# Supplementary material for: Impacts of dietary exposure to pesticides on faecal microbiome metabolism in adult twins
Source: PubMed Central journal article supplement (PMC9063241; doi:10.1186/s12940-022-00860-0), 2022-05-03

# GenomeScan Report

## Next Generation Sequencing

|                     |                                                                                                                                      |
|---------------------|--------------------------------------------------------------------------------------------------------------------------------------|
| Address:            | Robin Mesnage<br>King's College London<br>Dept of Medical and Molecular Genetics<br>8th floor<br>Tower Wing Guy's Hospital London UK |
| Project reference:  | 103613                                                                                                                               |
| Project start date: | 2019-02-28                                                                                                                           |
| Project manager:    | David van der Meer                                                                                                                   |
| Service type:       | Illumina Next Generation Sequencing                                                                                                  |
| Progress:           | Finished                                                                                                                             |
| Document status:    | v1 Final                                                                                                                             |

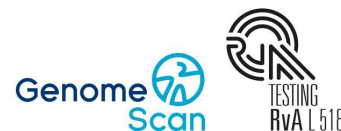

## Summary

This project report contains all information regarding submitted samples, qualitychecks, experimental procedures, and the resulting data that was generated in your project.

A total of 130 samples were sequenced using Illumina sequencing technology. Data analysis was not part of the scope of this project

If you have any additional questions regarding this report, please do not hesitate to contact our Project Manager.

## Materials

GenomeScan received in total 130 sample(s) in this batch. The samples were received in good condition on: 2019-03-05. To assess the quality of the samples, the concentration of the sample was determined using the Fragment Analyzer. Detailed quality metrics can be found in the Sample Summary table (Table 1) and the Appendix of this report. All sample(s) met our quality requirements.

Table 1. Sample information and quality metrics

| GS_ID          | Customer ID | RQN | Active | Entry QC (ng/ul) | Entry QC Passed |
|----------------|-------------|-----|--------|------------------|-----------------|
| 103613-001-001 | 60341       | N/A | Yes    | 106.77           | Yes             |
| 103613-001-002 | 85581       | N/A | Yes    | 10.28            | Yes             |
| 103613-001-003 | 79842       | N/A | Yes    | 6.78             | Yes             |
| 103613-001-004 | 73031       | N/A | Yes    | 47.87            | Yes             |
| 103613-001-005 | 79841       | N/A | Yes    | 5.09             | Yes             |
| 103613-001-006 | 54851       | N/A | Yes    | 95.25            | Yes             |
| 103613-001-007 | 79021       | N/A | Yes    | 52.77            | Yes             |
| 103613-001-008 | 51841       | N/A | Yes    | 136.65           | Yes             |
| 103613-001-009 | 81271       | N/A | Yes    | 102.60           | Yes             |
| 103613-001-010 | 76471       | N/A | Yes    | 154.97           | Yes             |
| 103613-001-011 | 50391       | N/A | Yes    | 43.04            | Yes             |

| GS_ID          | Customer ID | RQN | Active | Entry QC (ng/ul) | Entry QC Passed |
|----------------|-------------|-----|--------|------------------|-----------------|
| 103613-001-012 | 85462       | N/A | Yes    | 69.16            | Yes             |
| 103613-001-013 | 90692       | N/A | Yes    | 138.77           | Yes             |
| 103613-001-014 | 90691       | N/A | Yes    | 21.55            | Yes             |
| 103613-001-015 | 25022       | N/A | Yes    | 18.83            | Yes             |
| 103613-001-016 | 51842       | N/A | Yes    | 75.26            | Yes             |
| 103613-001-017 | 73532       | N/A | Yes    | 79.37            | Yes             |
| 103613-001-018 | 7112        | N/A | Yes    | 4.32             | Yes             |
| 103613-001-019 | 81202       | N/A | Yes    | 62.35            | Yes             |
| 103613-001-020 | 11332       | N/A | Yes    | 159.30           | Yes             |
| 103613-001-021 | 23932       | N/A | Yes    | 66.28            | Yes             |
| 103613-001-022 | 68172       | N/A | Yes    | 175.14           | Yes             |
| 103613-001-023 | NC1         | N/A | Yes    | 2.36             | Yes             |
| 103613-001-024 | PC3         | N/A | Yes    | 25.85            | Yes             |
| 103613-001-025 | 11331       | N/A | Yes    | 76.24            | Yes             |
| 103613-001-026 | 76841       | N/A | Yes    | 277.39           | Yes             |
| 103613-001-027 | 80971       | N/A | Yes    | 246.14           | Yes             |
| 103613-001-028 | 25021       | N/A | Yes    | 121.82           | Yes             |
| 103613-001-029 | 23191       | N/A | Yes    | 3.52             | Yes             |
| 103613-001-030 | 85582       | N/A | Yes    | 64.01            | Yes             |
| 103613-001-031 | 23192       | N/A | Yes    | 328.97           | Yes             |

| GS_ID          | Customer ID | RQN | Active | Entry QC (ng/ul) | Entry QC Passed |
|----------------|-------------|-----|--------|------------------|-----------------|
| 103613-001-032 | 96512       | N/A | Yes    | 195.22           | Yes             |
| 103613-001-033 | 64811       | N/A | Yes    | 180.13           | Yes             |
| 103613-001-034 | 58481       | N/A | Yes    | 118.17           | Yes             |
| 103613-001-035 | 80972       | N/A | Yes    | 57.78            | Yes             |
| 103613-001-036 | 23101       | N/A | Yes    | 146.06           | Yes             |
| 103613-001-037 | 10891       | N/A | Yes    | 12.96            | Yes             |
| 103613-001-038 | 83012       | N/A | Yes    | 33.23            | Yes             |
| 103613-001-039 | 83641       | N/A | Yes    | 220.38           | Yes             |
| 103613-001-040 | 81272       | N/A | Yes    | 169.65           | Yes             |
| 103613-001-041 | 23931       | N/A | Yes    | 232.35           | Yes             |
| 103613-001-042 | 60342       | N/A | Yes    | 14.89            | Yes             |
| 103613-001-043 | 64812       | N/A | Yes    | 150.02           | Yes             |
| 103613-001-044 | 85521       | N/A | Yes    | 152.93           | Yes             |
| 103613-001-045 | 85461       | N/A | Yes    | 23.27            | Yes             |
| 103613-001-046 | 76472       | N/A | Yes    | 124.64           | Yes             |
| 103613-001-047 | PC2         | N/A | Yes    | 32.37            | Yes             |
| 103613-001-048 | NC2         | N/A | Yes    | 2.02             | Yes             |
| 103613-001-049 | 83022       | N/A | Yes    | 7.34             | Yes             |
| 103613-001-050 | 23102       | N/A | Yes    | 10.33            | Yes             |
| 103613-001-051 | 6511        | N/A | Yes    | 186.95           | Yes             |

| GS_ID          | Customer ID | RQN | Active | Entry QC (ng/ul) | Entry QC Passed |
|----------------|-------------|-----|--------|------------------|-----------------|
| 103613-001-052 | 57992       | N/A | Yes    | 14.49            | Yes             |
| 103613-001-053 | 23801       | N/A | Yes    | 5.88             | Yes             |
| 103613-001-054 | 90702       | N/A | Yes    | 160.79           | Yes             |
| 103613-001-055 | 58482       | N/A | Yes    | 116.97           | Yes             |
| 103613-001-056 | 54852       | N/A | Yes    | 191.61           | Yes             |
| 103613-001-057 | 76262       | N/A | Yes    | 101.98           | Yes             |
| 103613-001-058 | 23802       | N/A | Yes    | 9.91             | Yes             |
| 103613-001-059 | 83802       | N/A | Yes    | 5.28             | Yes             |
| 103613-001-060 | 73111       | N/A | Yes    | 123.68           | Yes             |
| 103613-001-061 | 85522       | N/A | Yes    | 97.34            | Yes             |
| 103613-001-062 | 73531       | N/A | Yes    | 259.62           | Yes             |
| 103613-001-063 | 73512       | N/A | Yes    | 25.22            | Yes             |
| 103613-001-064 | 6512        | N/A | Yes    | 4.03             | Yes             |
| 103613-001-065 | 73511       | N/A | Yes    | 7.90             | Yes             |
| 103613-001-066 | 7431        | N/A | Yes    | 242.86           | Yes             |
| 103613-001-067 | 68171       | N/A | Yes    | 8.48             | Yes             |
| 103613-001-068 | 34371       | N/A | Yes    | 166.98           | Yes             |
| 103613-001-069 | 57991       | N/A | Yes    | 148.58           | Yes             |
| 103613-001-070 | 83011       | N/A | Yes    | 39.56            | Yes             |
| 103613-001-071 | 73112       | N/A | Yes    | 27.62            | Yes             |

| GS_ID          | Customer ID | RQN | Active | Entry QC (ng/ul) | Entry QC Passed |
|----------------|-------------|-----|--------|------------------|-----------------|
| 103613-001-072 | 90701       | N/A | Yes    | 230.10           | Yes             |
| 103613-001-073 | 96022       | N/A | Yes    | 278.20           | Yes             |
| 103613-001-074 | 10892       | N/A | Yes    | 6.09             | Yes             |
| 103613-001-075 | 78842       | N/A | Yes    | 31.76            | Yes             |
| 103613-001-076 | 24091       | N/A | Yes    | 215.40           | Yes             |
| 103613-001-077 | 90112       | N/A | Yes    | 7.21             | Yes             |
| 103613-001-078 | 83801       | N/A | Yes    | 34.21            | Yes             |
| 103613-001-079 | 7432        | N/A | Yes    | 111.64           | Yes             |
| 103613-001-080 | 94272       | N/A | Yes    | 293.50           | Yes             |
| 103613-001-081 | 24092       | N/A | Yes    | 242.05           | Yes             |
| 103613-001-082 | 4632        | N/A | Yes    | 8.23             | Yes             |
| 103613-001-083 | 57851       | N/A | Yes    | 134.56           | Yes             |
| 103613-001-084 | 94442       | N/A | Yes    | 336.54           | Yes             |
| 103613-001-085 | 81391       | N/A | Yes    | 4.10             | Yes             |
| 103613-001-086 | 57852       | N/A | Yes    | 54.42            | Yes             |
| 103613-001-087 | 33051       | N/A | Yes    | 139.28           | Yes             |
| 103613-001-088 | 83021       | N/A | Yes    | 32.19            | Yes             |
| 103613-001-089 | 82461       | N/A | Yes    | 11.95            | Yes             |
| 103613-001-090 | 32952       | N/A | Yes    | 3.09             | Yes             |
| 103613-001-091 | 81392       | N/A | Yes    | 283.12           | Yes             |

| GS_ID          | Customer ID | RQN | Active | Entry QC (ng/ul) | Entry QC Passed |
|----------------|-------------|-----|--------|------------------|-----------------|
| 103613-001-092 | 4631        | N/A | Yes    | 50.53            | Yes             |
| 103613-001-093 | 96021       | N/A | Yes    | 159.46           | Yes             |
| 103613-001-094 | 58101       | N/A | Yes    | 263.78           | Yes             |
| 103613-001-095 | NC3         | N/A | Yes    | 1.56             | Yes             |
| 103613-001-096 | PC3         | N/A | Yes    | 19.47            | Yes             |
| 103613-001-097 | 64231       | N/A | Yes    | 29.31            | Yes             |
| 103613-001-098 | 58102       | N/A | Yes    | 6.13             | Yes             |
| 103613-001-099 | 16372       | N/A | Yes    | 15.92            | Yes             |
| 103613-001-100 | 66982       | N/A | Yes    | 13.29            | Yes             |
| 103613-001-101 | 32951       | N/A | Yes    | 3.27             | Yes             |
| 103613-001-102 | 51442       | N/A | Yes    | 8.44             | Yes             |
| 103613-001-103 | 16302       | N/A | Yes    | 8.20             | Yes             |
| 103613-001-104 | 81201       | N/A | Yes    | 116.34           | Yes             |
| 103613-001-105 | 59341       | N/A | Yes    | 7.06             | Yes             |
| 103613-001-106 | 82462       | N/A | Yes    | 8.79             | Yes             |
| 103613-001-107 | 83642       | N/A | Yes    | 13.45            | Yes             |
| 103613-001-108 | 9972        | N/A | Yes    | 10.31            | Yes             |
| 103613-001-109 | 90111       | N/A | Yes    | 6.94             | Yes             |
| 103613-001-110 | 9971        | N/A | Yes    | 3.13             | Yes             |
| 103613-001-111 | 76261       | N/A | Yes    | 113.18           | Yes             |

| GS_ID          | Customer ID | RQN | Active | Entry QC (ng/ul) | Entry QC Passed |
|----------------|-------------|-----|--------|------------------|-----------------|
| 103613-001-112 | 17232       | N/A | Yes    | 167.76           | Yes             |
| 103613-001-113 | 76842       | N/A | Yes    | 49.18            | Yes             |
| 103613-001-114 | NC4         | N/A | Yes    | 3.45             | Yes             |
| 103613-001-115 | PC4         | N/A | Yes    | 31.86            | Yes             |
| 103613-001-116 | 82731       | N/A | Yes    | 177.74           | Yes             |
| 103613-001-117 | 94271       | N/A | Yes    | 31.83            | Yes             |
| 103613-001-118 | 201         | N/A | Yes    | 8.49             | Yes             |
| 103613-001-119 | 95882       | N/A | Yes    | 71.02            | Yes             |
| 103613-001-120 | 33052       | N/A | Yes    | 21.76            | Yes             |
| 103613-001-121 | 34372       | N/A | Yes    | 170.19           | Yes             |
| 103613-001-122 | 17231       | N/A | Yes    | 125.41           | Yes             |
| 103613-001-123 | 59342       | N/A | Yes    | 4.49             | Yes             |
| 103613-001-124 | 96511       | N/A | Yes    | 166.25           | Yes             |
| 103613-001-125 | 73032       | N/A | Yes    | 3.72             | Yes             |
| 103613-001-126 | 94441       | N/A | Yes    | 163.80           | Yes             |
| 103613-001-127 | 67751       | N/A | Yes    | 21.99            | Yes             |
| 103613-001-128 | 50392       | N/A | Yes    | 156.47           | Yes             |
| 103613-001-129 | 95881       | N/A | Yes    | 127.20           | Yes             |
| 103613-001-130 | 64232       | N/A | Yes    | 14.59            | Yes             |
| 103613-001-131 | 67752       | N/A | Yes    | 92.49            | Yes             |



| GS_ID          | Customer ID | RQN | Active | Entry QC (ng/ul) | Entry QC Passed |
|----------------|-------------|-----|--------|------------------|-----------------|
| 103613-001-132 | 79022       | N/A | Yes    | 15.91            | Yes             |
| 103613-001-133 | 16371       | N/A | Yes    | 4.77             | Yes             |
| 103613-001-134 | 66981       | N/A | Yes    | 7.65             | Yes             |
| 103613-001-135 | 78841       | N/A | Yes    | 102.71           | Yes             |
| 103613-001-136 | 51441       | N/A | Yes    | 18.25            | Yes             |
| 103613-001-137 | 16301       | N/A | Yes    | 2.59             | Yes             |
| 103613-001-138 | 7111        | N/A | Yes    | 49.10            | Yes             |

### Experimental procedures

The NEBNext® Ultra II FS DNA module (cat# NEB #E7810S/L) and the NEBNext® Ultra II Ligation module (cat# NEB #E7595S/L) were used to process the samples. Fragmentation, A-tailing and ligation of sequencing adapters of the resulting product was performed according to the procedure described in the NEBNext Ultra II FS DNA module and NEBNext Ultra II Ligation module Instruction Manual. The quality and yield after sample preparation was measured with the Fragment Analyzer (Table 2 and Appendices). The size of the resulting product was consistent with the expected size of approximately 500-700 bp.

Table 2. Library construction

| GS_ID          | Customer ID | Molarity (nM) | Index/Barcode | Prep QC Passed |
|----------------|-------------|---------------|---------------|----------------|
| 103613-001-001 | 60341       | 66.13         | dIDT97        | Yes            |
| 103613-001-001 | 60341       | 31.66         | dIDT97        | Yes            |
| 103613-001-002 | 85581       | 4.33          | dIDT98        | Yes            |
| 103613-001-002 | 85581       | 1.49          | dIDT98        | Yes            |
| 103613-001-003 | 79842       | 0.92          | dIDT99        | Yes            |
| 103613-001-003 | 79842       | 4.65          | dIDT99        | Yes            |
| 103613-001-004 | 73031       | 46.36         | dIDT100       | Yes            |

| GS_ID          | Customer ID | Molarity (nM) | Index/Barcode | Prep QC Passed |
|----------------|-------------|---------------|---------------|----------------|
| 103613-001-004 | 73031       | 7.37          | dIDT100       | Yes            |
| 103613-001-005 | 79841       | 0.40          | dIDT101       | Yes            |
| 103613-001-005 | 79841       | 4.74          | dIDT101       | Yes            |
| 103613-001-006 | 54851       | 7.58          | dIDT102       | Yes            |
| 103613-001-006 | 54851       | 60.44         | dIDT102       | Yes            |
| 103613-001-007 | 79021       | 10.00         | dIDT103       | Yes            |
| 103613-001-007 | 79021       | 59.08         | dIDT103       | Yes            |
| 103613-001-008 | 51841       | 7.60          | dIDT104       | Yes            |
| 103613-001-008 | 51841       | 68.05         | dIDT104       | Yes            |
| 103613-001-009 | 81271       | 27.12         | dIDT105       | Yes            |
| 103613-001-009 | 81271       | 45.66         | dIDT105       | Yes            |
| 103613-001-010 | 76471       | 57.35         | dIDT10        | Yes            |
| 103613-001-011 | 50391       | 43.98         | dIDT11        | Yes            |
| 103613-001-012 | 85462       | 68.04         | dIDT12        | Yes            |
| 103613-001-013 | 90692       | 56.71         | dIDT13        | Yes            |
| 103613-001-014 | 90691       | 6.22          | dIDT14        | Yes            |
| 103613-001-015 | 25022       | 4.52          | dIDT15        | Yes            |
| 103613-001-016 | 51842       | 57.59         | dIDT106       | Yes            |
| 103613-001-016 | 51842       | 21.18         | dIDT106       | Yes            |
| 103613-001-017 | 73532       | 19.87         | dIDT107       | Yes            |

| GS_ID          | Customer ID | Molarity (nM) | Index/Barcode | Prep QC Passed |
|----------------|-------------|---------------|---------------|----------------|
| 103613-001-017 | 73532       | 58.31         | dIDT107       | Yes            |
| 103613-001-018 | 7112        | 29.09         | dIDT108       | Yes            |
| 103613-001-018 | 7112        | 14.54         | dIDT108       | Yes            |
| 103613-001-019 | 81202       | 100.01        | dIDT19        | Yes            |
| 103613-001-020 | 11332       | 118.84        | dIDT20        | Yes            |
| 103613-001-021 | 23932       | 47.37         | dIDT21        | Yes            |
| 103613-001-022 | 68172       | 75.65         | dIDT22        | Yes            |
| 103613-001-023 | NC1         | 1.21          | dIDT23        | Yes            |
| 103613-001-024 | PC3         | 26.31         | dIDT24        | Yes            |
| 103613-001-025 | 11331       | 8.62          | dIDT109       | Yes            |
| 103613-001-025 | 11331       | 65.52         | dIDT109       | Yes            |
| 103613-001-026 | 76841       | 59.27         | dIDT26        | Yes            |
| 103613-001-027 | 80971       | 68.52         | dIDT27        | Yes            |
| 103613-001-028 | 25021       | 74.92         | dIDT28        | Yes            |
| 103613-001-029 | 23191       | 6.38          | dIDT29        | Yes            |
| 103613-001-030 | 85582       | 77.37         | dIDT30        | Yes            |
| 103613-001-031 | 23192       | 59.70         | dIDT31        | Yes            |
| 103613-001-032 | 96512       | 65.57         | dIDT32        | Yes            |
| 103613-001-033 | 64811       | 7.81          | dIDT110       | Yes            |
| 103613-001-033 | 64811       | 61.78         | dIDT110       | Yes            |

| GS_ID          | Customer ID | Molarity (nM) | Index/Barcode | Prep QC Passed |
|----------------|-------------|---------------|---------------|----------------|
| 103613-001-034 | 58481       | 64.48         | dIDT34        | Yes            |
| 103613-001-035 | 80972       | 76.25         | dIDT35        | Yes            |
| 103613-001-036 | 23101       | 78.87         | dIDT36        | Yes            |
| 103613-001-037 | 10891       | 5.10          | dIDT37        | Yes            |
| 103613-001-038 | 83012       | 32.55         | dIDT38        | Yes            |
| 103613-001-039 | 83641       | 53.22         | dIDT39        | Yes            |
| 103613-001-040 | 81272       | 74.07         | dIDT40        | Yes            |
| 103613-001-041 | 23931       | 77.17         | dIDT111       | Yes            |
| 103613-001-041 | 23931       | 9.91          | dIDT111       | Yes            |
| 103613-001-042 | 60342       | 5.12          | dIDT42        | Yes            |
| 103613-001-043 | 64812       | 65.76         | dIDT43        | Yes            |
| 103613-001-044 | 85521       | 60.40         | dIDT44        | Yes            |
| 103613-001-045 | 85461       | 5.59          | dIDT45        | Yes            |
| 103613-001-046 | 76472       | 77.18         | dIDT46        | Yes            |
| 103613-001-047 | PC2         | 29.25         | dIDT47        | Yes            |
| 103613-001-048 | NC2         | 1.23          | dIDT48        | Yes            |
| 103613-001-049 | 83022       | 6.24          | dIDT112       | Yes            |
| 103613-001-049 | 83022       | 1.26          | dIDT112       | Yes            |
| 103613-001-050 | 23102       | 4.44          | dIDT50        | Yes            |
| 103613-001-051 | 6511        | 89.26         | dIDT51        | Yes            |

| GS_ID          | Customer ID | Molarity (nM) | Index/Barcode | Prep QC Passed |
|----------------|-------------|---------------|---------------|----------------|
| 103613-001-052 | 57992       | 6.27          | dIDT52        | Yes            |
| 103613-001-053 | 23801       | 4.76          | dIDT53        | Yes            |
| 103613-001-054 | 90702       | 67.95         | dIDT54        | Yes            |
| 103613-001-055 | 58482       | 86.66         | dIDT55        | Yes            |
| 103613-001-056 | 54852       | 80.73         | dIDT56        | Yes            |
| 103613-001-057 | 76262       | 56.48         | dIDT113       | Yes            |
| 103613-001-057 | 76262       | 10.72         | dIDT113       | Yes            |
| 103613-001-058 | 23802       | 5.19          | dIDT58        | Yes            |
| 103613-001-059 | 83802       | 6.03          | dIDT59        | Yes            |
| 103613-001-060 | 73111       | 58.95         | dIDT60        | Yes            |
| 103613-001-061 | 85522       | 59.76         | dIDT61        | Yes            |
| 103613-001-062 | 73531       | 64.79         | dIDT62        | Yes            |
| 103613-001-063 | 73512       | 24.45         | dIDT63        | Yes            |
| 103613-001-064 | 6512        | 3.88          | dIDT64        | Yes            |
| 103613-001-065 | 73511       | 1.03          | dIDT114       | Yes            |
| 103613-001-065 | 73511       | 3.70          | dIDT114       | Yes            |
| 103613-001-066 | 7431        | 56.09         | dIDT66        | Yes            |
| 103613-001-067 | 68171       | 4.15          | dIDT67        | Yes            |
| 103613-001-068 | 34371       | 58.16         | dIDT68        | Yes            |
| 103613-001-069 | 57991       | 106.55        | dIDT69        | Yes            |

| GS_ID          | Customer ID | Molarity (nM) | Index/Barcode | Prep QC Passed |
|----------------|-------------|---------------|---------------|----------------|
| 103613-001-070 | 83011       | 32.20         | dIDT70        | Yes            |
| 103613-001-071 | 73112       | 29.78         | dIDT71        | Yes            |
| 103613-001-072 | 90701       | 61.81         | dIDT72        | Yes            |
| 103613-001-073 | 96022       | 11.42         | dIDT115       | Yes            |
| 103613-001-073 | 96022       | 44.96         | dIDT115       | Yes            |
| 103613-001-074 | 10892       | 4.54          | dIDT74        | Yes            |
| 103613-001-075 | 78842       | 25.00         | dIDT75        | Yes            |
| 103613-001-076 | 24091       | 34.39         | dIDT76        | Yes            |
| 103613-001-077 | 90112       | 4.77          | dIDT77        | Yes            |
| 103613-001-078 | 83801       | 19.91         | dIDT78        | Yes            |
| 103613-001-079 | 7432        | 93.42         | dIDT79        | Yes            |
| 103613-001-080 | 94272       | 61.14         | dIDT80        | Yes            |
| 103613-001-081 | 24092       | 15.35         | dIDT116       | Yes            |
| 103613-001-081 | 24092       | 71.18         | dIDT116       | Yes            |
| 103613-001-082 | 4632        | 4.58          | dIDT82        | Yes            |
| 103613-001-083 | 57851       | 43.54         | dIDT83        | Yes            |
| 103613-001-084 | 94442       | 43.83         | dIDT84        | Yes            |
| 103613-001-085 | 81391       | 2.84          | dIDT85        | Yes            |
| 103613-001-086 | 57852       | 42.92         | dIDT86        | Yes            |
| 103613-001-087 | 33051       | 41.91         | dIDT87        | Yes            |

| GS_ID          | Customer ID | Molarity (nM) | Index/Barcode | Prep QC Passed |
|----------------|-------------|---------------|---------------|----------------|
| 103613-001-088 | 83021       | 28.73         | dIDT88        | Yes            |
| 103613-001-089 | 82461       | 3.92          | dIDT117       | Yes            |
| 103613-001-089 | 82461       | 0.90          | dIDT117       | Yes            |
| 103613-001-090 | 32952       | 2.88          | dIDT90        | Yes            |
| 103613-001-091 | 81392       | 47.38         | dIDT91        | Yes            |
| 103613-001-092 | 4631        | 39.39         | dIDT92        | Yes            |
| 103613-001-093 | 96021       | 57.45         | dIDT93        | Yes            |
| 103613-001-094 | 58101       | 52.06         | dIDT94        | Yes            |
| 103613-001-095 | NC3         | 0.73          | dIDT95        | Yes            |
| 103613-001-096 | PC3         | 4.88          | dIDT96        | Yes            |
| 103613-001-097 | 64231       | 3.42          | dIDT97        | Yes            |
| 103613-001-098 | 58102       | 1.01          | dIDT98        | Yes            |
| 103613-001-099 | 16372       | 3.41          | dIDT99        | Yes            |
| 103613-001-100 | 66982       | 2.77          | dIDT100       | Yes            |
| 103613-001-101 | 32951       | 1.14          | dIDT101       | Yes            |
| 103613-001-102 | 51442       | 2.58          | dIDT102       | Yes            |
| 103613-001-103 | 16302       | 1.93          | dIDT103       | Yes            |
| 103613-001-104 | 81201       | 27.16         | dIDT104       | Yes            |
| 103613-001-105 | 59341       | 1.15          | dIDT105       | Yes            |
| 103613-001-106 | 82462       | 1.55          | dIDT106       | Yes            |

| GS_ID          | Customer ID | Molarity (nM) | Index/Barcode | Prep QC Passed |
|----------------|-------------|---------------|---------------|----------------|
| 103613-001-107 | 83642       | 1.93          | dIDT107       | Yes            |
| 103613-001-108 | 9972        | 4.75          | dIDT108       | Yes            |
| 103613-001-109 | 90111       | 0.95          | dIDT109       | Yes            |
| 103613-001-110 | 9971        | 1.08          | dIDT110       | Yes            |
| 103613-001-111 | 76261       | 26.42         | dIDT111       | Yes            |
| 103613-001-112 | 17232       | 8.85          | dIDT112       | Yes            |
| 103613-001-113 | 76842       | 20.76         | dIDT113       | Yes            |
| 103613-001-114 | NC4         | 0.21          | dIDT114       | Yes            |
| 103613-001-115 | PC4         | 8.10          | dIDT115       | Yes            |
| 103613-001-116 | 82731       | 17.27         | dIDT116       | Yes            |
| 103613-001-117 | 94271       | 12.61         | dIDT117       | Yes            |
| 103613-001-118 | 201         | 1.68          | dIDT118       | Yes            |
| 103613-001-119 | 95882       | 18.32         | dIDT119       | Yes            |
| 103613-001-120 | 33052       | 3.73          | dIDT120       | Yes            |
| 103613-001-121 | 34372       | 20.45         | dIDT121       | Yes            |
| 103613-001-122 | 17231       | 13.32         | dIDT122       | Yes            |
| 103613-001-123 | 59342       | 0.88          | dIDT123       | Yes            |
| 103613-001-124 | 96511       | 8.57          | dIDT124       | Yes            |
| 103613-001-125 | 73032       | 1.30          | dIDT125       | Yes            |
| 103613-001-126 | 94441       | 22.67         | dIDT126       | Yes            |



| GS_ID          | Customer ID | Molarity (nM) | Index/Barcode | Prep QC Passed |
|----------------|-------------|---------------|---------------|----------------|
| 103613-001-127 | 67751       | 11.92         | dIDT127       | Yes            |
| 103613-001-128 | 50392       | 11.58         | dIDT128       | Yes            |
| 103613-001-129 | 95881       | 20.19         | dIDT129       | Yes            |
| 103613-001-130 | 64232       | 2.19          | dIDT130       | Yes            |
| 103613-001-131 | 67752       | 16.58         | dIDT131       | Yes            |
| 103613-001-132 | 79022       | 1.95          | dIDT132       | Yes            |
| 103613-001-133 | 16371       | 1.33          | dIDT133       | Yes            |
| 103613-001-134 | 66981       | 1.13          | dIDT134       | Yes            |
| 103613-001-135 | 78841       | 9.60          | dIDT135       | Yes            |
| 103613-001-136 | 51441       | 1.57          | dIDT136       | Yes            |
| 103613-001-137 | 16301       | 1.53          | dIDT137       | Yes            |
| 103613-001-138 | 7111        | 11.76         | dIDT138       | Yes            |

Clustering and DNA sequencing using the NovaSeq6000 was performed according to manufacturer's protocols. A concentration of 1.1 nM of DNA was used. Detailed run information per flow cell can be found in Table 3. NovaSeq control software NCS v1.6 was used.

The experiments were performed at the following site(s): GenomeScan B.V., Plesmanlaan 1d, 2333 BZ, Leiden.

### Primary data analysis and results

Image analysis, base calling, and quality check was performed with the Illumina data analysis pipeline RTA3.4.4 and Bcl2fastq v2.20. Quality-filtered sequence tags are placed in the 'Raw Data' folder on the accompanying hard disk.

The flow cell information and total raw yield (Mb) for each sample are summarised in Tables 3 and 4.

Table 3. Run info

| Flowcell ID | Device       | Run length   |
|-------------|--------------|--------------|
| HL3NFDSXX   | Novaseq 6000 | 150-8-10-150 |

| Flowcell ID | Device       | Run length  |
|-------------|--------------|-------------|
| HLFNLDSXX   | Novaseq 6000 | 151-8-8-151 |
| HLC37DSXX   | Novaseq 6000 | 151-8-8-151 |

Table 4. Run yields per sample

| GS_ID          | Sample ID | Yield (Mb) | Clusters   | % >=Q30 |
|----------------|-----------|------------|------------|---------|
| 103613-001-001 | 60341     | 4,494      | 14,882,117 | 90.20   |
| 103613-001-002 | 85581     | 10,102     | 33,448,823 | 90.28   |
| 103613-001-003 | 79842     | 8,906      | 29,489,564 | 91.03   |
| 103613-001-004 | 73031     | 8,310      | 27,516,086 | 89.93   |
| 103613-001-005 | 79841     | 9,367      | 31,016,019 | 89.57   |
| 103613-001-006 | 54851     | 9,709      | 32,148,320 | 90.24   |
| 103613-001-007 | 79021     | 11,667     | 38,652,757 | 89.49   |
| 103613-001-008 | 51841     | 10,107     | 33,467,150 | 90.45   |
| 103613-001-009 | 81271     | 10,323     | 34,180,955 | 91.34   |
| 103613-001-010 | 76471     | 19,041     | 63,471,221 | 92.80   |
| 103613-001-011 | 50391     | 16,764     | 55,878,429 | 93.51   |
| 103613-001-012 | 85462     | 17,132     | 57,106,791 | 92.63   |
| 103613-001-013 | 90692     | 10,770     | 35,899,080 | 93.31   |
| 103613-001-014 | 90691     | 21,129     | 70,430,008 | 93.06   |
| 103613-001-015 | 25022     | 11,394     | 37,978,708 | 93.28   |
| 103613-001-016 | 51842     | 9,954      | 32,960,865 | 92.13   |

| GS_ID          | Sample ID | Yield (Mb) | Clusters   | % >=Q30 |
|----------------|-----------|------------|------------|---------|
| 103613-001-017 | 73532     | 8,441      | 27,950,780 | 92.03   |
| 103613-001-018 | 7112      | 5,547      | 18,399,607 | 91.54   |
| 103613-001-019 | 81202     | 9,565      | 31,884,998 | 92.00   |
| 103613-001-020 | 11332     | 19,914     | 66,381,512 | 88.50   |
| 103613-001-021 | 23932     | 7,810      | 26,034,029 | 92.25   |
| 103613-001-022 | 68172     | 8,382      | 27,940,911 | 91.88   |
| 103613-001-023 | NC1       | 513        | 1,709,335  | 75.09   |
| 103613-001-025 | 11331     | 7,790      | 25,794,642 | 90.56   |
| 103613-001-026 | 76841     | 7,650      | 25,499,739 | 93.33   |
| 103613-001-027 | 80971     | 6,340      | 21,134,182 | 92.89   |
| 103613-001-028 | 25021     | 7,908      | 26,360,241 | 92.22   |
| 103613-001-029 | 23191     | 8,331      | 27,768,773 | 92.76   |
| 103613-001-030 | 85582     | 6,568      | 21,892,287 | 92.30   |
| 103613-001-031 | 23192     | 7,086      | 23,618,848 | 93.47   |
| 103613-001-032 | 96512     | 9,867      | 32,889,842 | 93.17   |
| 103613-001-033 | 64811     | 10,231     | 33,876,451 | 90.25   |
| 103613-001-034 | 58481     | 6,286      | 20,953,627 | 92.12   |
| 103613-001-035 | 80972     | 5,353      | 17,841,863 | 93.22   |
| 103613-001-036 | 23101     | 7,678      | 25,594,749 | 91.78   |
| 103613-001-037 | 10891     | 8,112      | 27,039,711 | 94.15   |

| GS_ID          | Sample ID | Yield (Mb) | Clusters   | % >=Q30 |
|----------------|-----------|------------|------------|---------|
| 103613-001-038 | 83012     | 9,170      | 30,568,317 | 92.47   |
| 103613-001-039 | 83641     | 8,552      | 28,507,000 | 92.95   |
| 103613-001-040 | 81272     | 8,888      | 29,627,969 | 92.47   |
| 103613-001-041 | 23931     | 12,536     | 41,510,769 | 91.43   |
| 103613-001-042 | 60342     | 14,901     | 49,668,427 | 92.48   |
| 103613-001-043 | 64812     | 7,746      | 25,819,044 | 93.44   |
| 103613-001-044 | 85521     | 9,940      | 33,132,212 | 93.03   |
| 103613-001-045 | 85461     | 12,019     | 39,876,325 | 93.47   |
| 103613-001-046 | 76472     | 8,271      | 27,570,112 | 92.08   |
| 103613-001-047 | PC2       | 9,355      | 31,182,454 | 92.40   |
| 103613-001-049 | 83022     | 9,469      | 31,355,426 | 91.27   |
| 103613-001-050 | 23102     | 9,824      | 32,746,351 | 92.88   |
| 103613-001-051 | 6511      | 7,700      | 25,667,509 | 91.64   |
| 103613-001-052 | 57992     | 9,066      | 30,221,048 | 92.64   |
| 103613-001-053 | 23801     | 9,125      | 30,416,296 | 93.47   |
| 103613-001-054 | 90702     | 6,445      | 21,483,741 | 93.02   |
| 103613-001-055 | 58482     | 6,873      | 22,908,924 | 91.81   |
| 103613-001-056 | 54852     | 11,010     | 36,699,987 | 91.44   |
| 103613-001-057 | 76262     | 8,832      | 29,245,204 | 90.61   |
| 103613-001-058 | 23802     | 9,214      | 30,713,532 | 93.37   |

| GS_ID          | Sample ID | Yield (Mb) | Clusters   | % >=Q30 |
|----------------|-----------|------------|------------|---------|
| 103613-001-059 | 83802     | 7,717      | 25,723,602 | 93.65   |
| 103613-001-060 | 73111     | 7,785      | 25,950,066 | 93.17   |
| 103613-001-061 | 85522     | 8,175      | 27,250,317 | 93.54   |
| 103613-001-062 | 73531     | 10,097     | 33,657,420 | 92.94   |
| 103613-001-063 | 73512     | 9,098      | 30,325,944 | 93.36   |
| 103613-001-064 | 6512      | 16,760     | 55,866,227 | 93.72   |
| 103613-001-065 | 73511     | 6,975      | 23,097,054 | 91.42   |
| 103613-001-066 | 7431      | 9,532      | 31,772,964 | 93.42   |
| 103613-001-067 | 68171     | 11,609     | 38,696,166 | 93.66   |
| 103613-001-068 | 34371     | 6,168      | 20,561,598 | 93.52   |
| 103613-001-069 | 57991     | 7,721      | 25,735,596 | 92.05   |
| 103613-001-070 | 83011     | 6,853      | 22,842,872 | 93.52   |
| 103613-001-071 | 73112     | 8,155      | 27,184,617 | 93.47   |
| 103613-001-072 | 90701     | 10,982     | 36,607,384 | 93.48   |
| 103613-001-073 | 96022     | 8,894      | 29,451,437 | 91.25   |
| 103613-001-074 | 10892     | 11,608     | 38,692,310 | 93.96   |
| 103613-001-075 | 78842     | 8,575      | 28,584,127 | 93.79   |
| 103613-001-076 | 24091     | 9,931      | 33,103,057 | 92.80   |
| 103613-001-077 | 90112     | 9,088      | 30,292,906 | 93.68   |
| 103613-001-078 | 83801     | 9,092      | 30,305,115 | 93.69   |

| GS_ID          | Sample ID | Yield (Mb) | Clusters   | % >=Q30 |
|----------------|-----------|------------|------------|---------|
| 103613-001-079 | 7432      | 12,240     | 40,801,423 | 91.70   |
| 103613-001-080 | 94272     | 9,171      | 30,568,621 | 92.94   |
| 103613-001-081 | 24092     | 8,060      | 26,690,054 | 91.45   |
| 103613-001-082 | 4632      | 9,189      | 30,628,735 | 93.65   |
| 103613-001-083 | 57851     | 9,488      | 31,628,234 | 92.87   |
| 103613-001-084 | 94442     | 6,593      | 21,977,655 | 93.44   |
| 103613-001-085 | 81391     | 9,265      | 30,882,527 | 93.63   |
| 103613-001-086 | 57852     | 10,273     | 34,244,561 | 93.78   |
| 103613-001-087 | 33051     | 9,321      | 31,070,039 | 93.32   |
| 103613-001-088 | 83021     | 18,237     | 60,790,894 | 92.91   |
| 103613-001-089 | 82461     | 4,301      | 14,241,827 | 90.41   |
| 103613-001-090 | 32952     | 8,349      | 27,829,230 | 93.94   |
| 103613-001-091 | 81392     | 8,529      | 28,429,456 | 93.40   |
| 103613-001-092 | 4631      | 8,500      | 28,333,272 | 93.88   |
| 103613-001-093 | 96021     | 7,057      | 23,524,132 | 93.41   |
| 103613-001-094 | 58101     | 7,428      | 24,760,565 | 92.41   |
| 103613-001-097 | 64231     | 6,270      | 20,899,621 | 93.71   |
| 103613-001-098 | 58102     | 9,159      | 30,530,203 | 93.73   |
| 103613-001-099 | 16372     | 10,023     | 33,410,570 | 93.89   |
| 103613-001-100 | 66982     | 8,473      | 28,241,963 | 93.88   |

| GS_ID          | Sample ID | Yield (Mb) | Clusters   | % >=Q30 |
|----------------|-----------|------------|------------|---------|
| 103613-001-101 | 32951     | 6,051      | 20,169,530 | 93.66   |
| 103613-001-102 | 51442     | 9,858      | 32,858,360 | 93.80   |
| 103613-001-103 | 16302     | 10,355     | 34,517,748 | 93.80   |
| 103613-001-104 | 81201     | 12,287     | 40,957,267 | 93.98   |
| 103613-001-105 | 59341     | 6,861      | 22,869,496 | 93.56   |
| 103613-001-106 | 82462     | 9,925      | 33,082,903 | 93.93   |
| 103613-001-107 | 83642     | 6,048      | 20,159,918 | 93.12   |
| 103613-001-108 | 9972      | 13,264     | 44,213,859 | 93.78   |
| 103613-001-109 | 90111     | 6,984      | 23,280,720 | 93.29   |
| 103613-001-110 | 9971      | 5,827      | 19,423,101 | 92.35   |
| 103613-001-111 | 76261     | 12,980     | 43,268,316 | 93.87   |
| 103613-001-112 | 17232     | 23,356     | 77,535,454 | 92.77   |
| 103613-001-113 | 76842     | 18,970     | 62,965,490 | 92.39   |
| 103613-001-116 | 82731     | 16,916     | 56,147,909 | 92.16   |
| 103613-001-117 | 94271     | 17,174     | 56,998,192 | 93.18   |
| 103613-001-118 | 201       | 4,726      | 15,753,506 | 93.90   |
| 103613-001-119 | 95882     | 16,306     | 54,125,985 | 92.04   |
| 103613-001-120 | 33052     | 9,048      | 30,158,727 | 93.45   |
| 103613-001-121 | 34372     | 24,491     | 81,286,219 | 93.27   |
| 103613-001-122 | 17231     | 18,905     | 62,746,169 | 92.83   |

| GS_ID          | Sample ID | Yield (Mb) | Clusters    | % >=Q30 |
|----------------|-----------|------------|-------------|---------|
| 103613-001-123 | 59342     | 6,499      | 21,664,513  | 93.91   |
| 103613-001-124 | 96511     | 20,212     | 67,085,370  | 92.51   |
| 103613-001-125 | 73032     | 11,486     | 38,288,143  | 93.97   |
| 103613-001-126 | 94441     | 22,688     | 75,303,758  | 93.06   |
| 103613-001-127 | 67751     | 31,024     | 102,967,650 | 93.76   |
| 103613-001-128 | 50392     | 19,519     | 64,786,870  | 92.77   |
| 103613-001-129 | 95881     | 23,233     | 77,108,537  | 92.88   |
| 103613-001-130 | 64232     | 6,928      | 23,016,932  | 93.38   |
| 103613-001-131 | 67752     | 26,742     | 88,764,603  | 93.41   |
| 103613-001-132 | 79022     | 8,904      | 29,680,373  | 93.30   |
| 103613-001-133 | 16371     | 6,703      | 22,343,363  | 93.87   |
| 103613-001-134 | 66981     | 6,308      | 20,951,616  | 93.34   |
| 103613-001-135 | 78841     | 21,279     | 70,629,697  | 92.99   |
| 103613-001-136 | 51441     | 5,204      | 17,345,452  | 93.89   |
| 103613-001-137 | 16301     | 5,826      | 19,359,048  | 93.50   |
| 103613-001-138 | 7111      | 19,166     | 63,619,836  | 93.31   |

The raw data in the 'Raw data' directory are coded with the flow cell numbers and the per sample data can be found within these run folders.



### Deviations, additions, exclusions from the test method

This project was performed in compliance with the requirements and specifications set by GenomeScan and the customer. All data are within specifications.

There were no deviations from the standard test procedures.

### Data transfer and formats

The data files are stored on the accompanying data disk as part of the results delivery. The raw data can be found in the 'Raw data' folder on the disk. The report can be found in the 'Reports' folder. If data analysis is performed, the results can be found in the analysis folder.

All files provided are in either plain text (.txt), tab-delimited text (.tab, .txt), PDF format (.pdf), or OpenDocument format (.odt, .ods). Plain text files can be opened in any text editor although some files for the Next Generation Sequencing service may be too large and an editor optimised for large files is required. Tab-delimited files can be opened in any text editor or spreadsheet application. PDF files require Adobe Reader to open and OpenDocument files can be opened in Microsoft Office 2007 SP2 or later versions.

Tab delimited files (.tab) are formatted using a dot as decimal separator and without thousand separators. They should be opened using an English locale to avoid incorrect translation of decimal and thousand separators.

This project report was digitally signed by:

Gerard Gathier  
Technician

Stephanie van den Oever  
Project Manager

Date: 2019-07-22

## Fragment Analyzer Project Summary:

Data Files: 2019 06 18 13H 16M.raw, 2019 06 18 14H 35M.raw

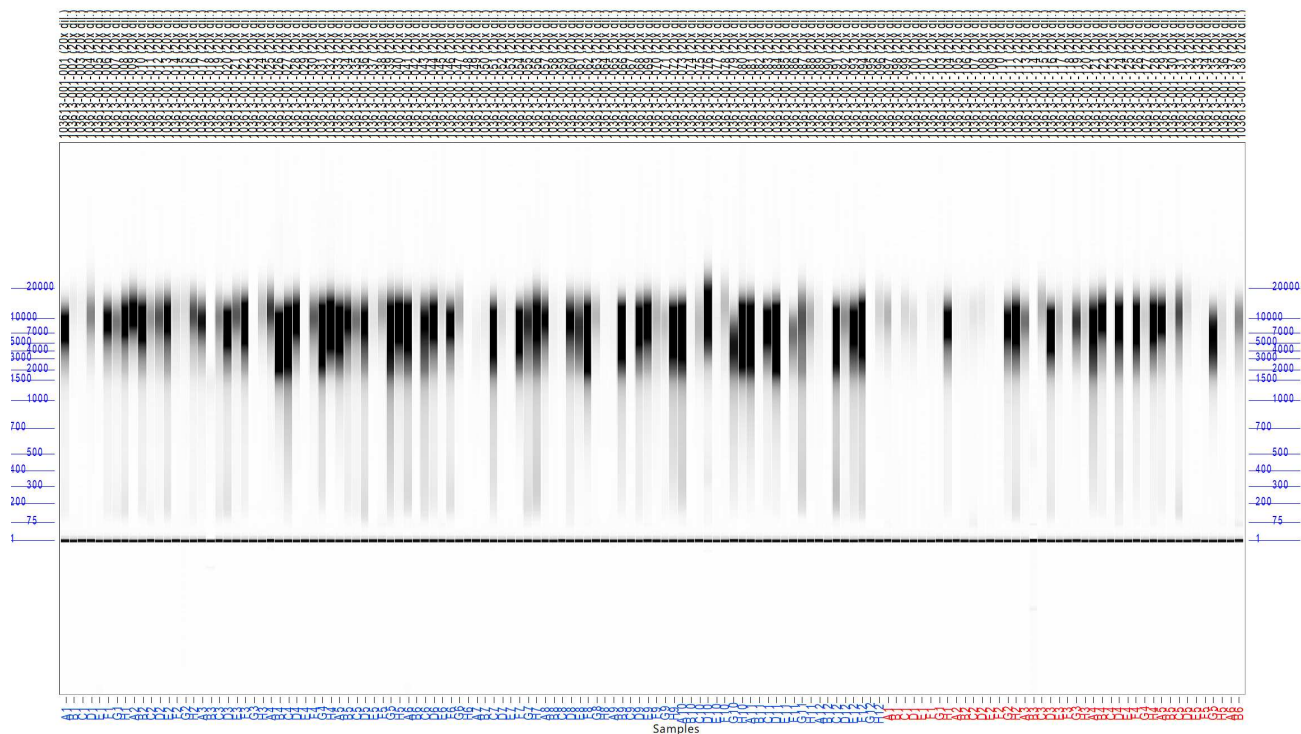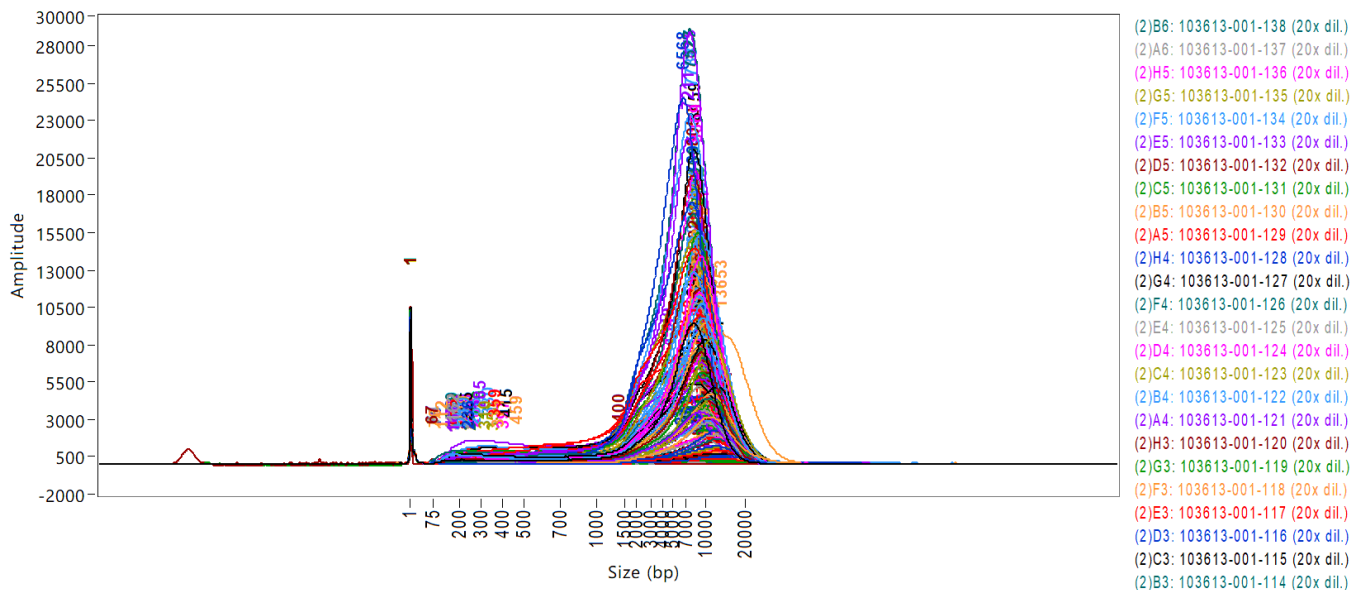

**Filename and Data Path:** X:\Lopende Opdrachten\GAIM103613\EntryQC\EntryQC\_gDNA HS\_103613(p11) 13-16-27\2019 06 18 13H 16M.raw

**Created:** Tuesday, June 18, 2019 1:45:41 PM

**# of Capillaries:** 96

**Array Serial #:** 111918-04SFS

**Effect Length:** 33 cm

**Array Usage Count:** 89

**FA Version #:** 1.2.0.11

**Device Serial #:** 3658

#### METHOD INFORMATION

**Method Name:** DNF-488-33 - HS Genomic DNA.mthds

**Gel Prime:** No

**Full Conditioning:** Yes

**Gel Prime to Buffer:** No

**Gel Selection:** Gel 1

**Perform Prerun:** 6.0 kV, 30 sec.

**Rinse:** No

**Marker 1:** No

**Rinse:** Tray: 3, Row: A, # Dips: 1

**Sample Injection:** 5.0 kV, 15 sec.

**Separation:** 6.0 kV, 50.0 min.

**Tray Name:** EntryQC\_gDNA HS\_103613(p11)

**Analysis Mode:** gDNA

#### NOTE

**Filename and Data Path:** X:\Lopende Opdrachten\GAI\103613\EntryQC\EntryQC\_gDNA HS\_103613(pl2)\_103713\_103165-032 14-35-54\2019 06 18 14H 35M.raw

**Created:** Tuesday, June 18, 2019 3:04:59 PM

**# of Capillaries:** 96

**Array Serial #:** 111918-04SFS

**Effect Length:** 33 cm

**Array Usage Count:** 90

**FA Version #:** 1.2.0.11

**Device Serial #:** 3658

#### METHOD INFORMATION

**Method Name:** DNF-488-33 - HS Genomic DNA.mthds

**Gel Prime:** No

**Full Conditioning:** Yes

**Gel Prime to Buffer:** No

**Gel Selection:** Gel 1

**Perform Prerun:** 6.0 kV, 30 sec.

**Rinse:** No

**Marker 1:** No

**Rinse:** Tray: 3, Row: A, # Dips: 1

**Sample Injection:** 5.0 kV, 15 sec.

**Separation:** 6.0 kV, 50.0 min.

**Tray Name:** EntryQC\_gDNA HS\_103613(pl2)\_103713\_103165-032

**Analysis Mode:** gDNA

#### NOTE

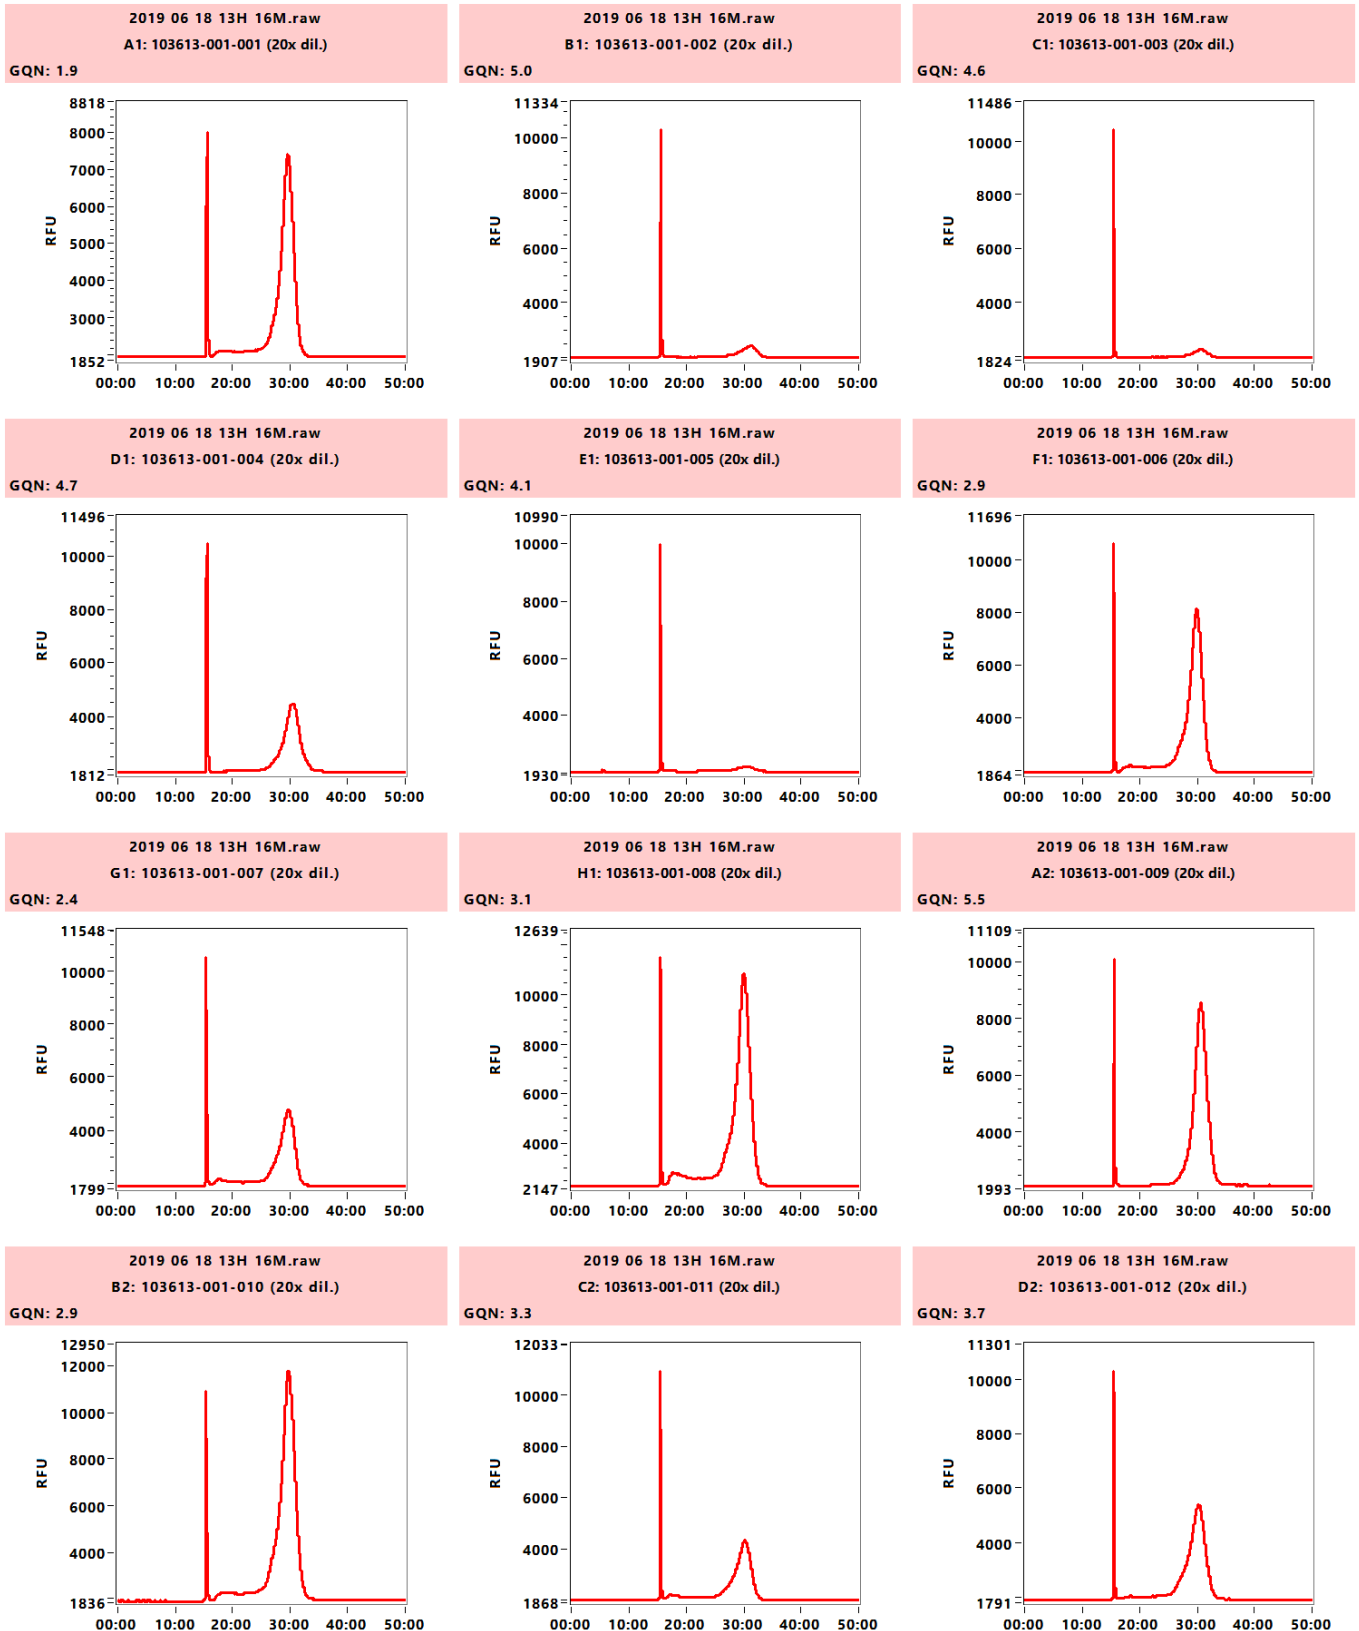

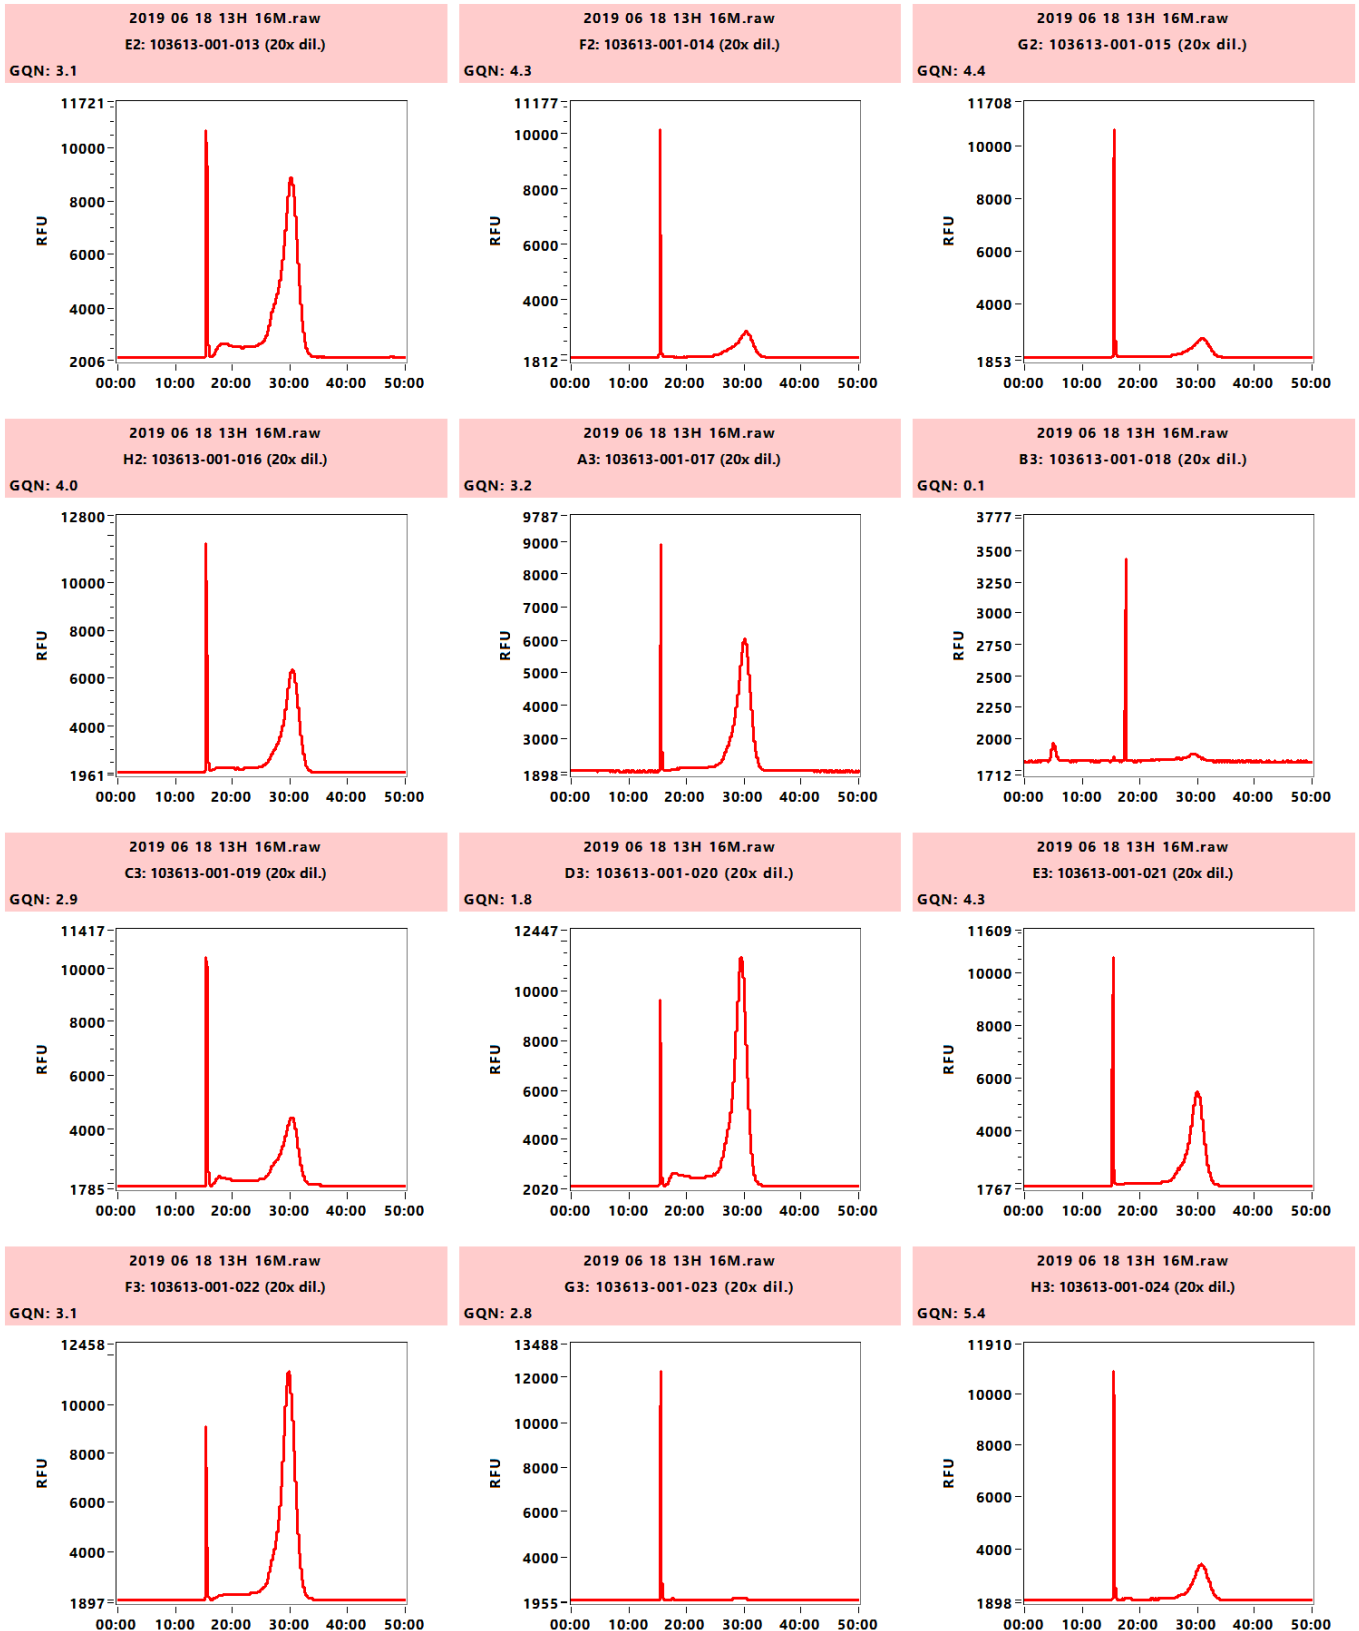

2019 06 18 13H 16M.raw  
A4: 103613-001-025 (20x dil.)  
GQN: 5.3

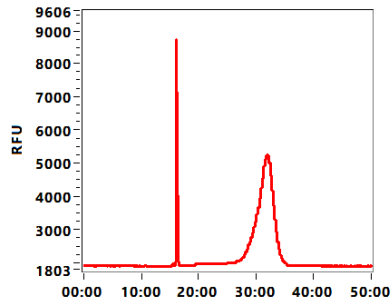

2019 06 18 13H 16M.raw  
B4: 103613-001-026 (20x dil.)  
GQN: 1.0

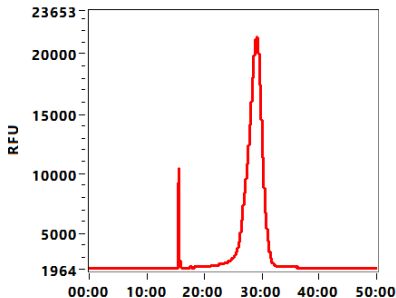

2019 06 18 13H 16M.raw  
C4: 103613-001-027 (20x dil.)  
GQN: 1.7

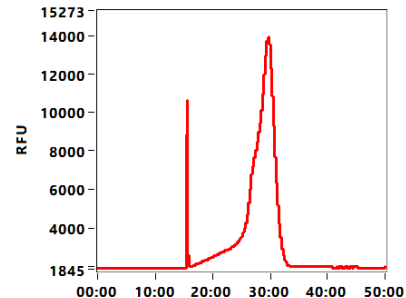

2019 06 18 13H 16M.raw  
D4: 103613-001-028 (20x dil.)  
GQN: 4.1

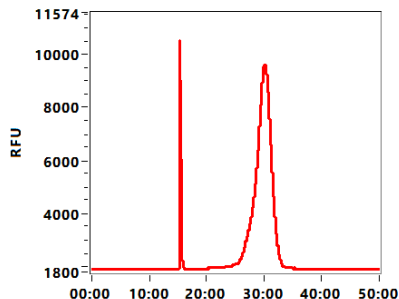

2019 06 18 13H 16M.raw  
E4: 103613-001-029 (20x dil.)  
GQN: 3.1

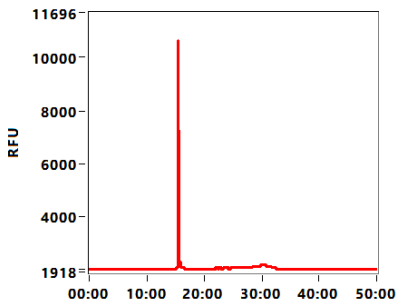

2019 06 18 13H 16M.raw  
F4: 103613-001-030 (20x dil.)  
GQN: 3.7

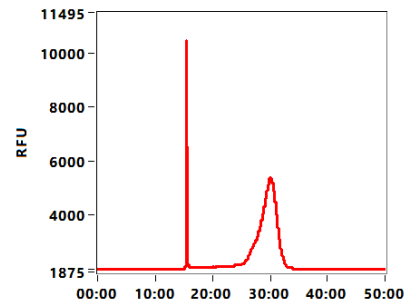

2019 06 18 13H 16M.raw  
G4: 103613-001-031 (20x dil.)  
GQN: 1.7

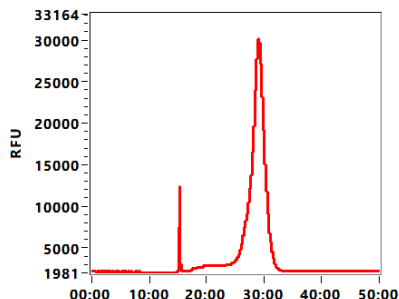

2019 06 18 13H 16M.raw  
H4: 103613-001-032 (20x dil.)  
GQN: 3.4

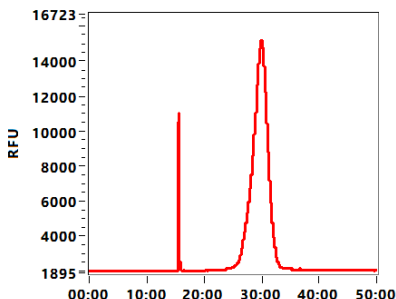

2019 06 18 13H 16M.raw  
A5: 103613-001-033 (20x dil.)  
GQN: 2.4

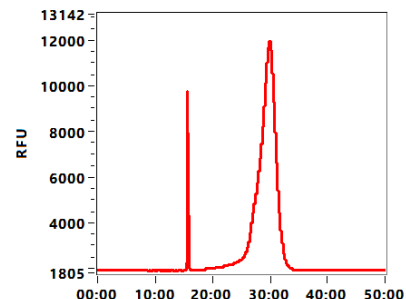

2019 06 18 13H 16M.raw  
B5: 103613-001-034 (20x dil.)  
GQN: 3.0

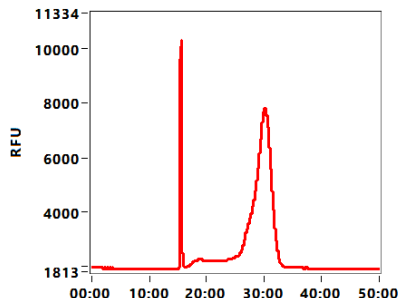

2019 06 18 13H 16M.raw  
C5: 103613-001-035 (20x dil.)  
GQN: 2.8

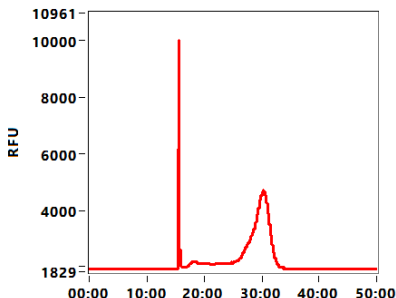

2019 06 18 13H 16M.raw  
D5: 103613-001-036 (20x dil.)  
GQN: 2.3

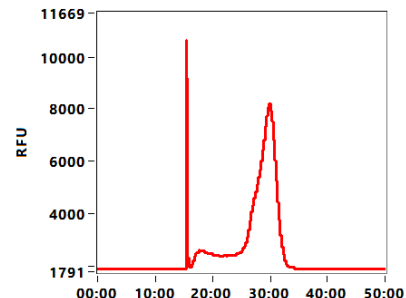

2019 06 18 13H 16M.raw  
E5: 103613-001-037 (20x dil.)  
GQN: 4.5

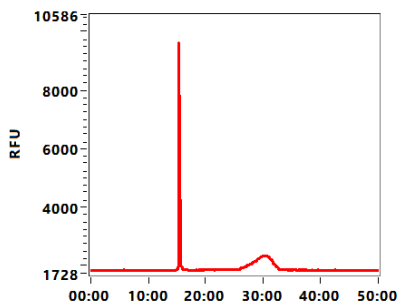

2019 06 18 13H 16M.raw  
F5: 103613-001-038 (20x dil.)  
GQN: 4.9

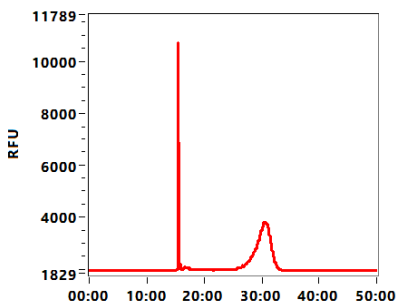

2019 06 18 13H 16M.raw  
G5: 103613-001-039 (20x dil.)  
GQN: 2.1

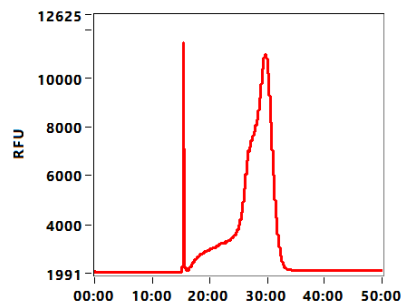

2019 06 18 13H 16M.raw  
H5: 103613-001-040 (20x dil.)  
GQN: 3.2

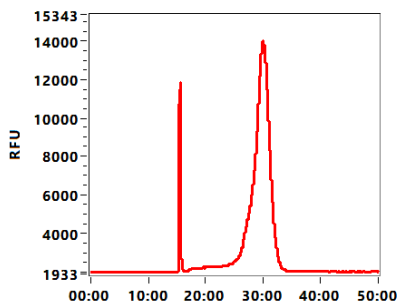

2019 06 18 13H 16M.raw  
A6: 103613-001-041 (20x dil.)  
GQN: 2.2

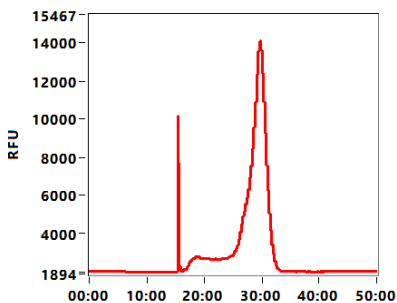

2019 06 18 13H 16M.raw  
B6: 103613-001-042 (20x dil.)  
GQN: 5.0

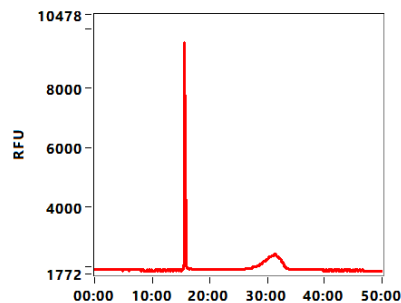

2019 06 18 13H 16M.raw  
C6: 103613-001-043 (20x dil.)  
GQN: 1.9

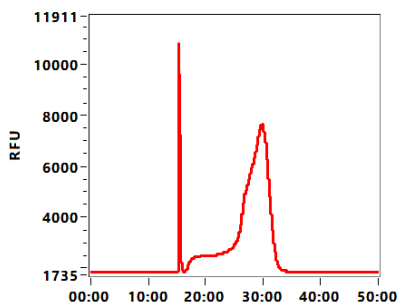

2019 06 18 13H 16M.raw  
D6: 103613-001-044 (20x dil.)  
GQN: 3.1

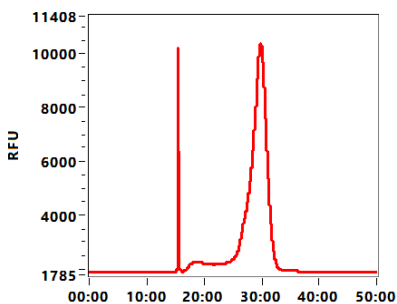

2019 06 18 13H 16M.raw  
E6: 103613-001-045 (20x dil.)  
GQN: 4.5

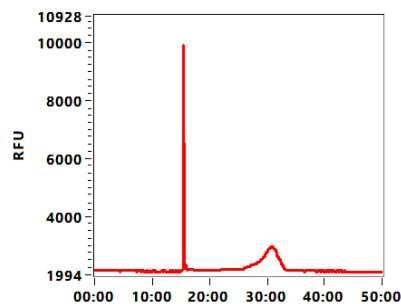

2019 06 18 13H 16M.raw  
F6: 103613-001-046 (20x dil.)  
GQN: 2.2

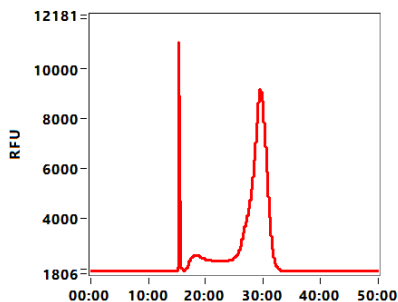

2019 06 18 13H 16M.raw  
G6: 103613-001-047 (20x dil.)  
GQN: 5.1

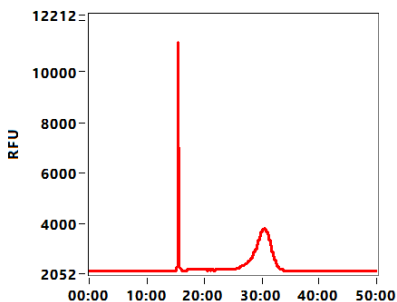

2019 06 18 13H 16M.raw  
H6: 103613-001-048 (20x dil.)  
GQN: 3.8

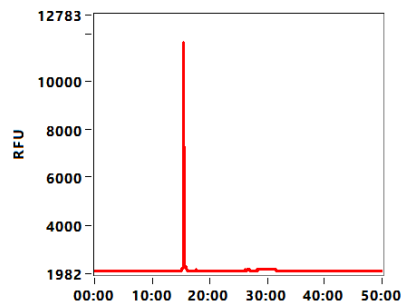



2019 06 18 13H 16M.raw  
A7: 103613-001-049 (20x dil.)  
GQN: 2.0

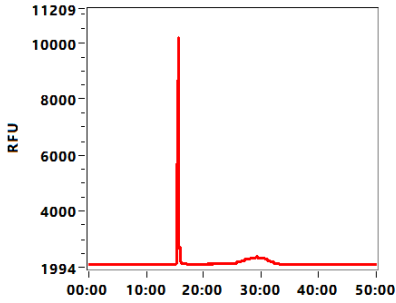

2019 06 18 13H 16M.raw  
B7: 103613-001-050 (20x dil.)  
GQN: 4.1

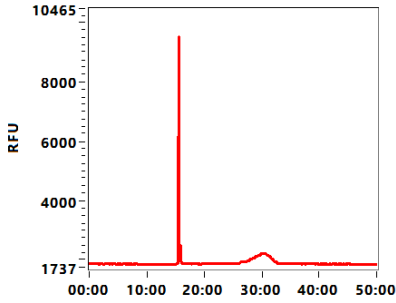

2019 06 18 13H 16M.raw  
C7: 103613-001-051 (20x dil.)  
GQN: 1.7

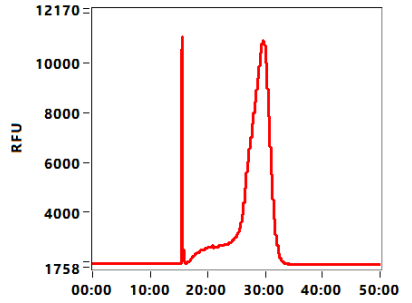

2019 06 18 13H 16M.raw  
D7: 103613-001-052 (20x dil.)  
GQN: 4.0

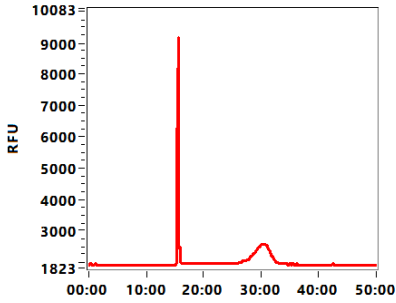

2019 06 18 13H 16M.raw  
E7: 103613-001-053 (20x dil.)  
GQN: 4.5

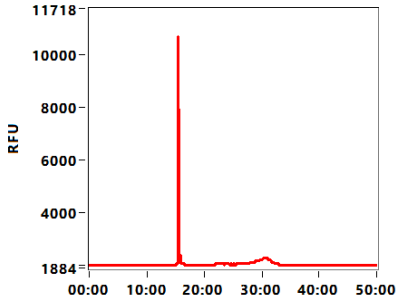

2019 06 18 13H 16M.raw  
F7: 103613-001-054 (20x dil.)  
GQN: 1.8

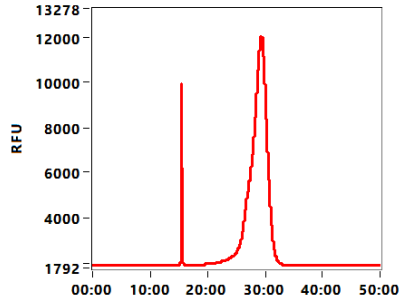

2019 06 18 13H 16M.raw  
G7: 103613-001-055 (20x dil.)  
GQN: 2.3

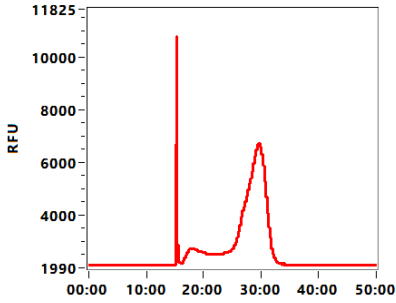

2019 06 18 13H 16M.raw  
H7: 103613-001-056 (20x dil.)  
GQN: 2.5

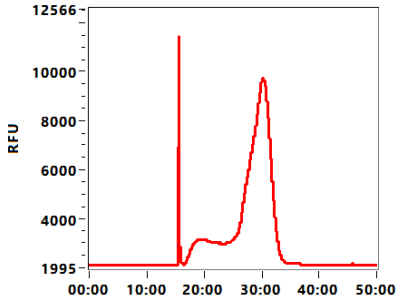

2019 06 18 13H 16M.raw  
A8: 103613-001-057 (20x dil.)  
GQN: 3.4

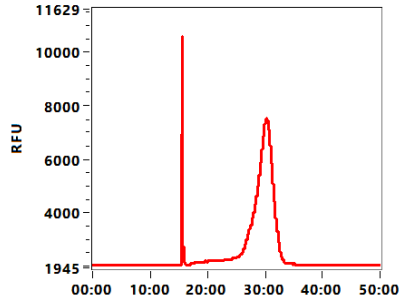

2019 06 18 13H 16M.raw  
B8: 103613-001-058 (20x dil.)  
GQN: 2.8

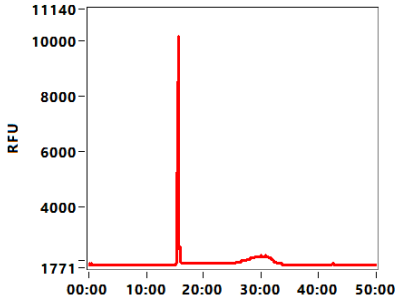

2019 06 18 13H 16M.raw  
C8: 103613-001-059 (20x dil.)  
GQN: 3.1

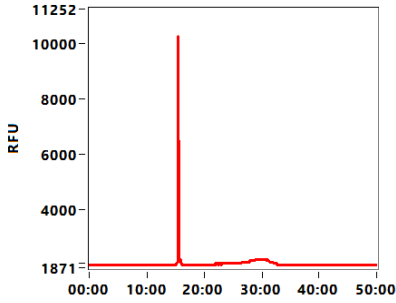

2019 06 18 13H 16M.raw  
D8: 103613-001-060 (20x dil.)  
GQN: 2.7

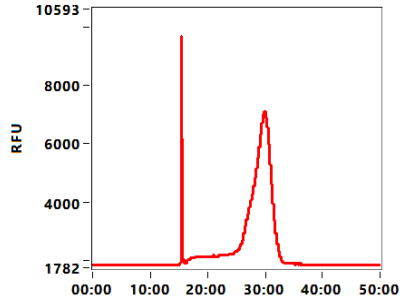

2019 06 18 13H 16M.raw  
E8: 103613-001-061 (20x dil.)  
GQN: 2.5

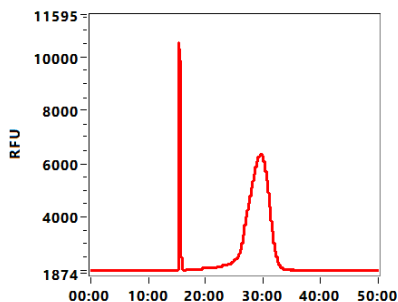

2019 06 18 13H 16M.raw  
F8: 103613-001-062 (20x dil.)  
GQN: 1.8

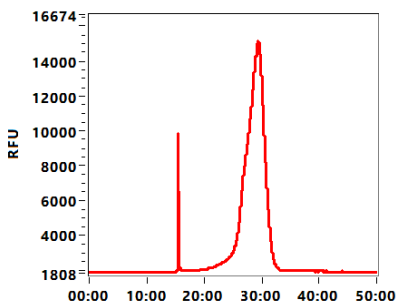

2019 06 18 13H 16M.raw  
G8: 103613-001-063 (20x dil.)  
GQN: 4.1

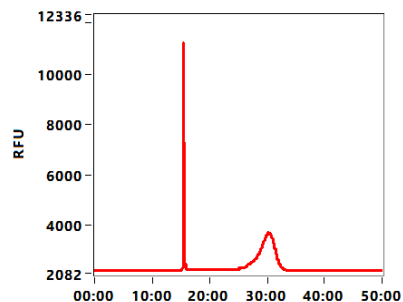

2019 06 18 13H 16M.raw  
H8: 103613-001-064 (20x dil.)  
GQN: 3.8

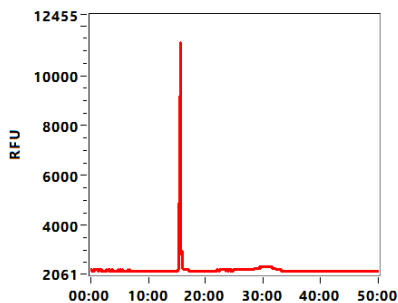

2019 06 18 13H 16M.raw  
A9: 103613-001-065 (20x dil.)  
GQN: 3.1

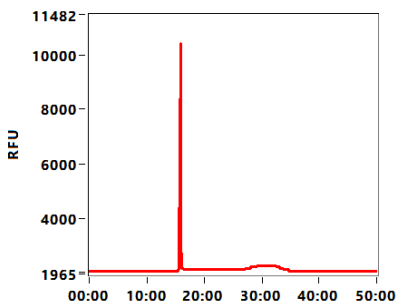

2019 06 18 13H 16M.raw  
B9: 103613-001-066 (20x dil.)  
GQN: 1.9

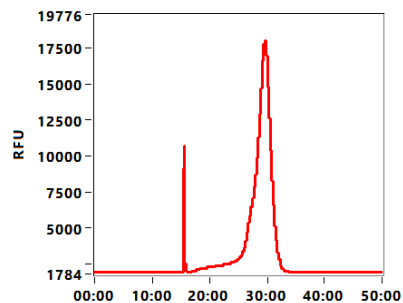

2019 06 18 13H 16M.raw  
C9: 103613-001-067 (20x dil.)  
GQN: 4.1

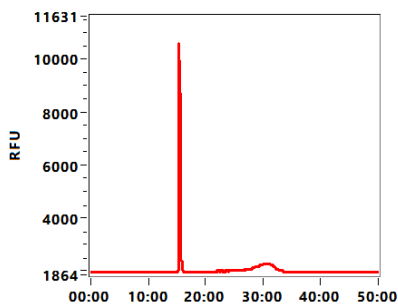

2019 06 18 13H 16M.raw  
D9: 103613-001-068 (20x dil.)  
GQN: 2.4

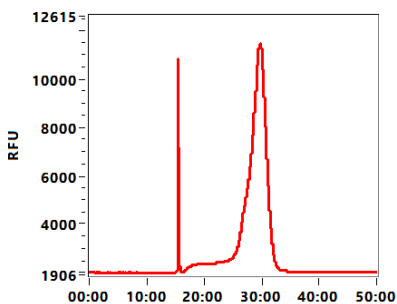

2019 06 18 13H 16M.raw  
E9: 103613-001-069 (20x dil.)  
GQN: 3.3

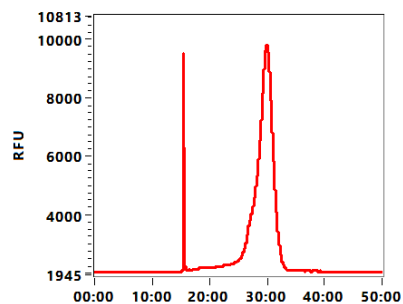

2019 06 18 13H 16M.raw  
F9: 103613-001-070 (20x dil.)  
GQN: 3.4

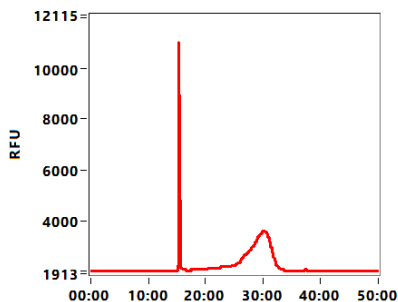

2019 06 18 13H 16M.raw  
G9: 103613-001-071 (20x dil.)  
GQN: 2.5

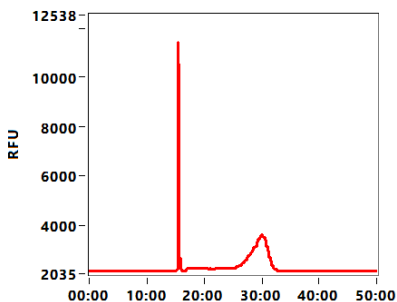

2019 06 18 13H 16M.raw  
H9: 103613-001-072 (20x dil.)  
GQN: 1.8

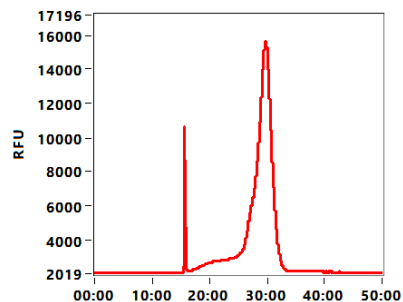

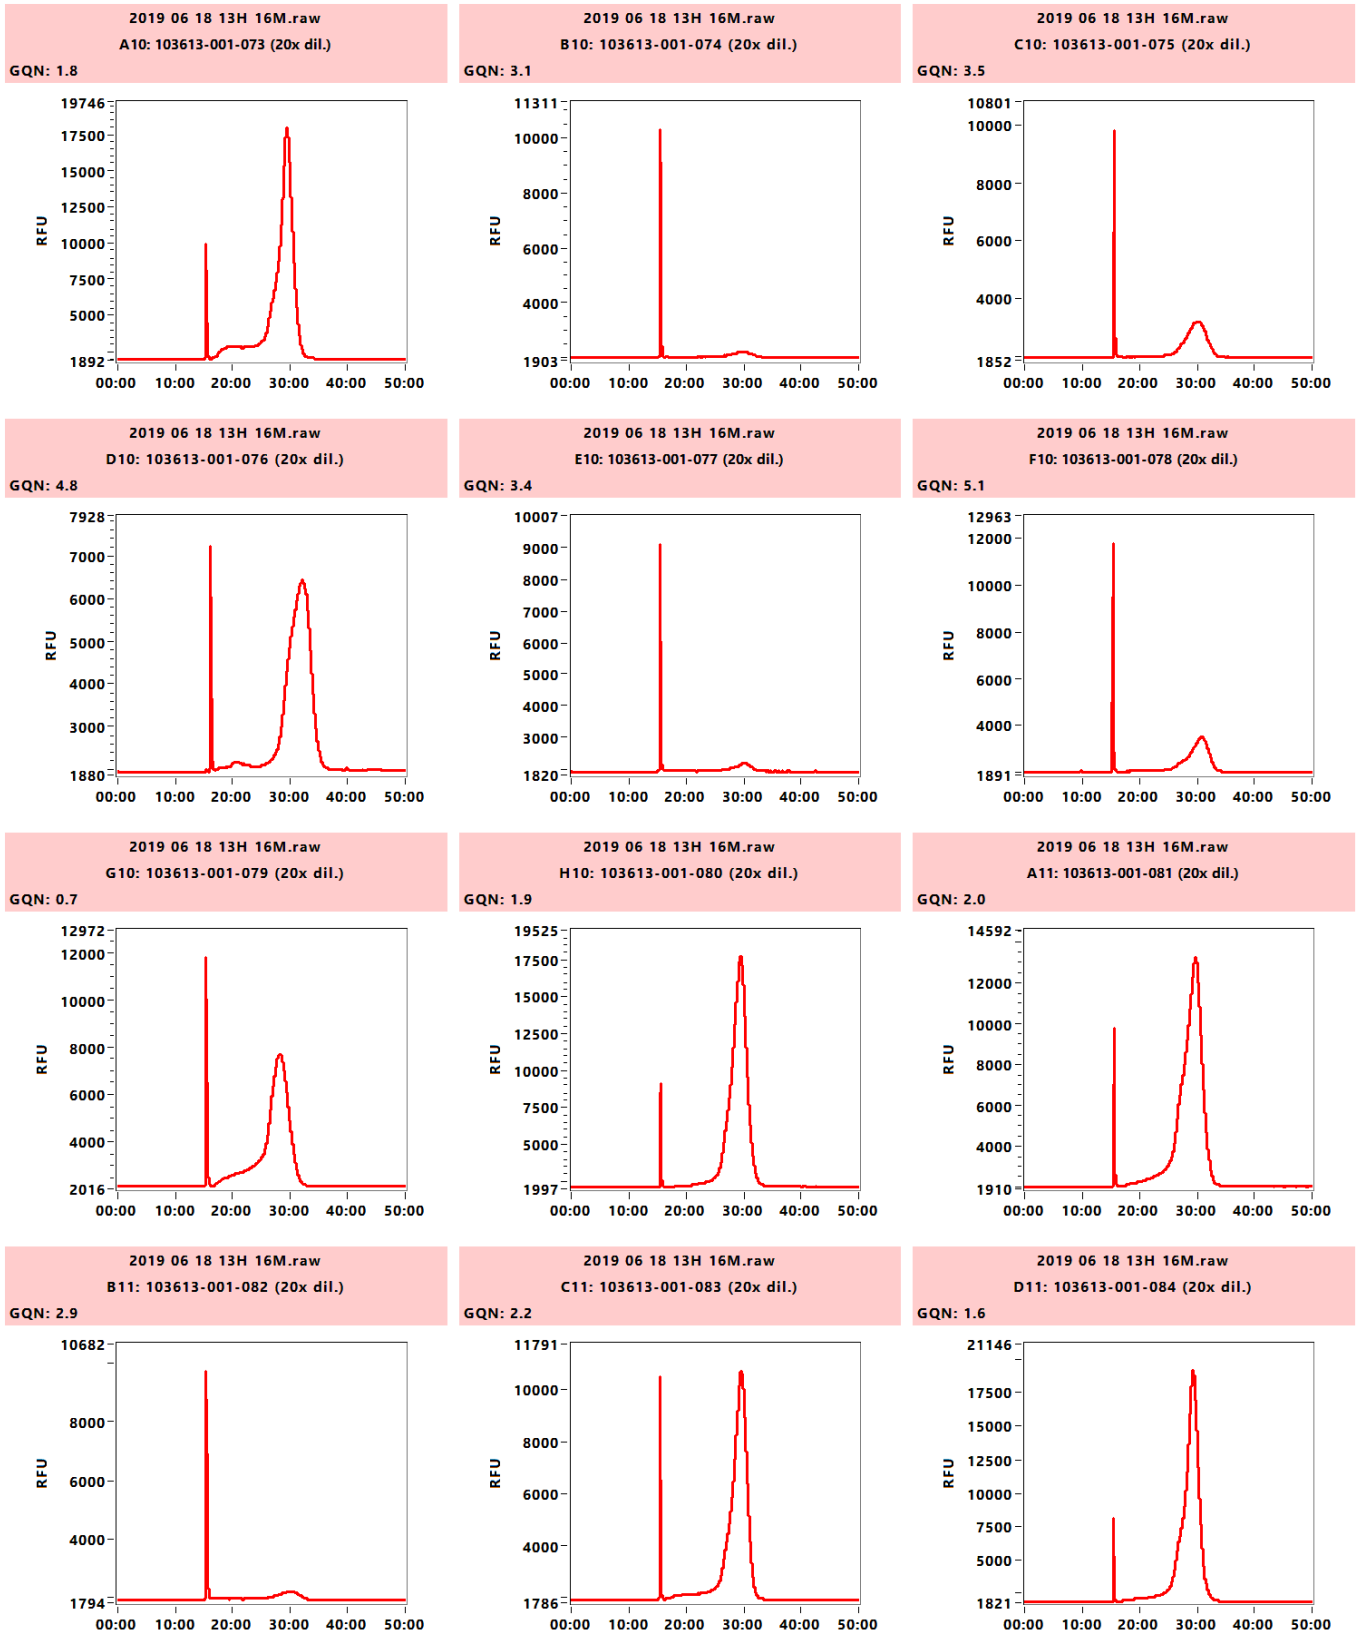

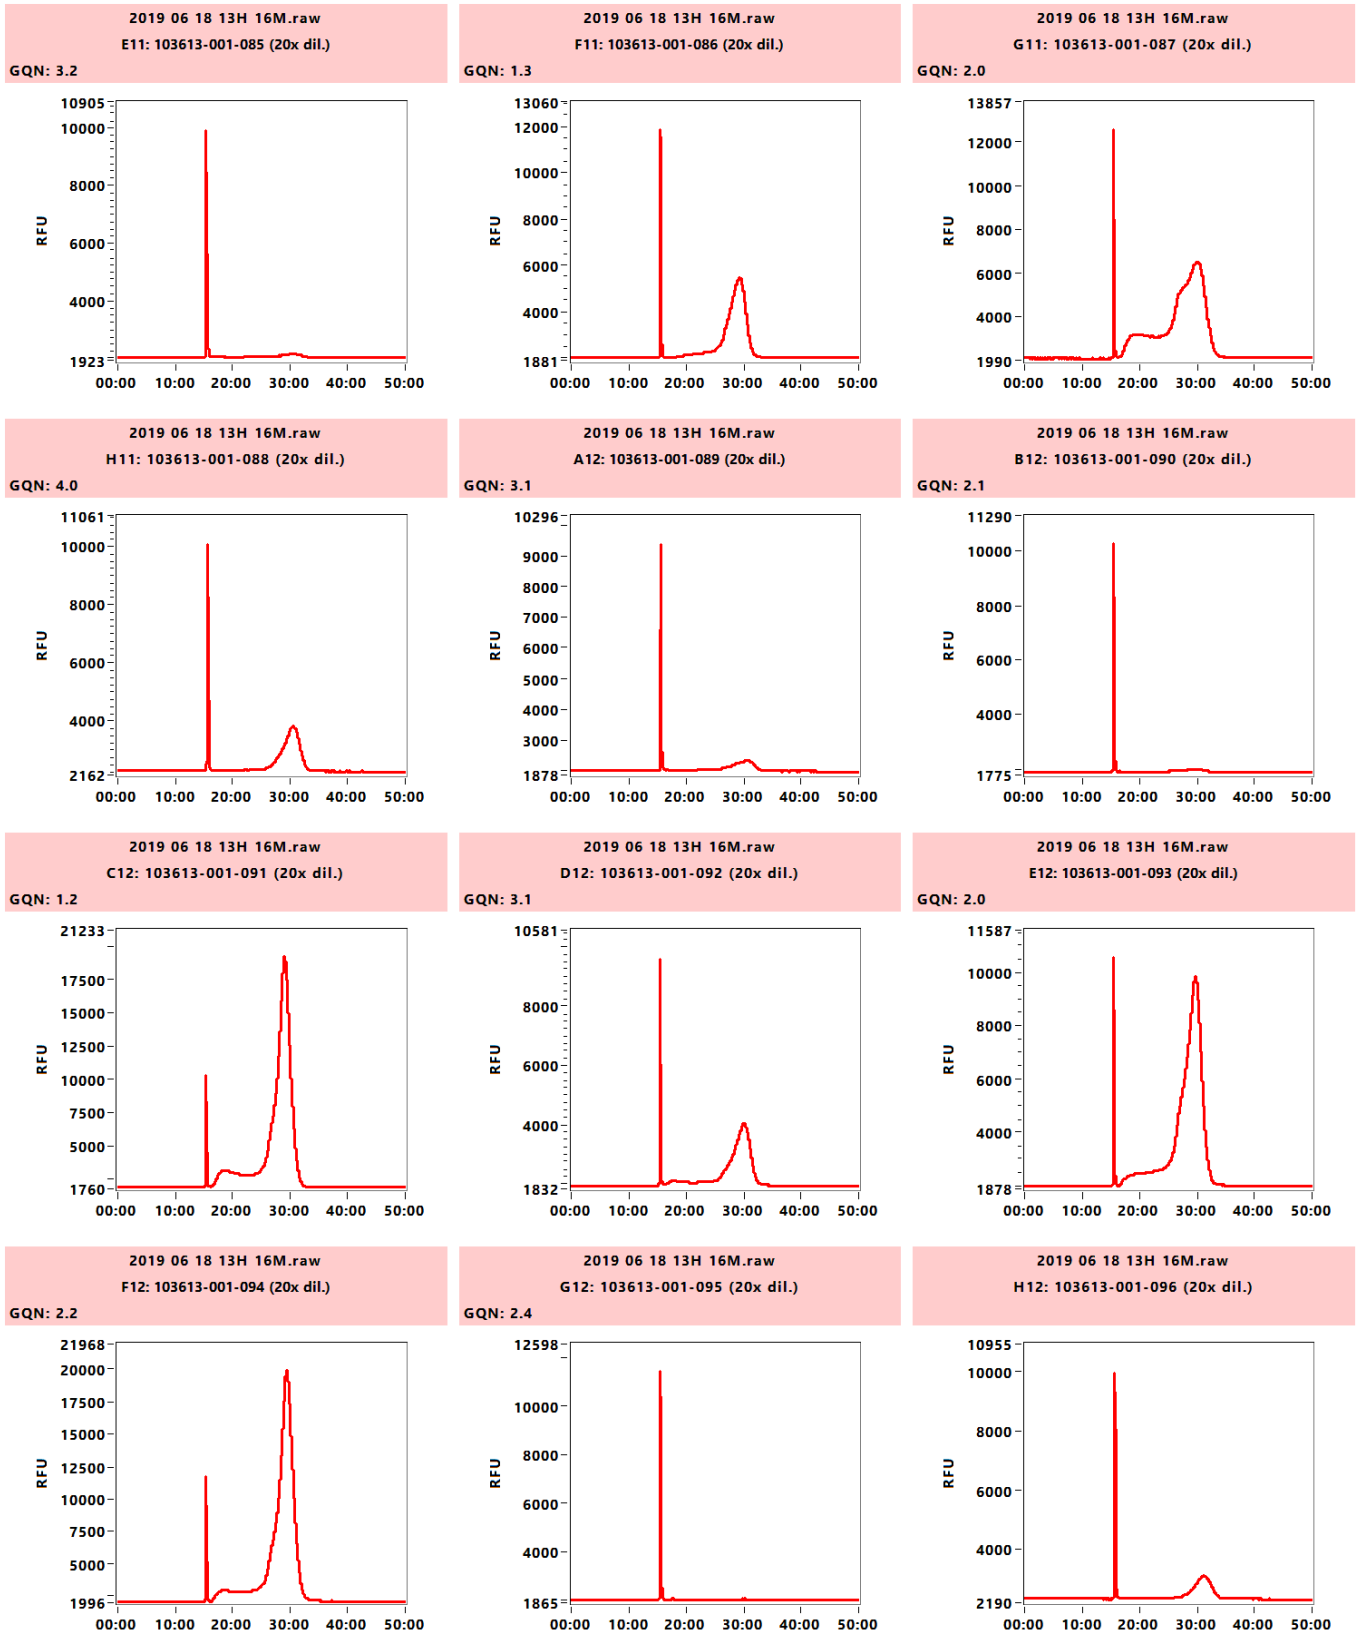

2019 06 18 14H 35M.raw  
A1: 103613-001-097 (20x dil.)  
GQN: 4.3

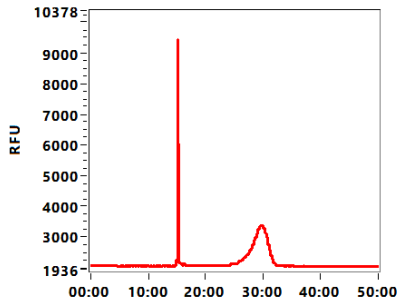

2019 06 18 14H 35M.raw  
B1: 103613-001-098 (20x dil.)  
GQN: 2.6

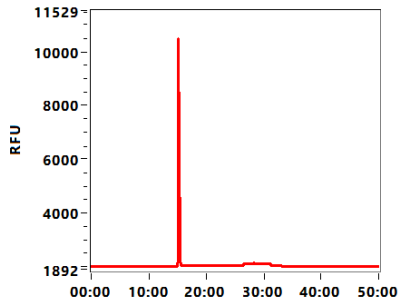

2019 06 18 14H 35M.raw  
C1: 103613-001-099 (20x dil.)  
GQN: 4.9

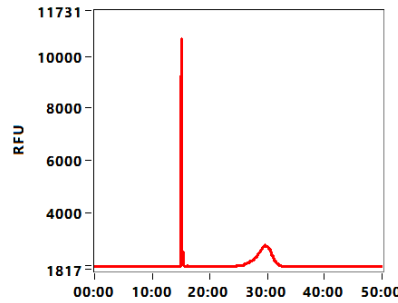

2019 06 18 14H 35M.raw  
D1: 103613-001-100 (20x dil.)  
GQN: 3.3

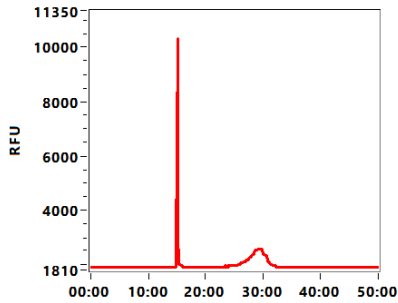

2019 06 18 14H 35M.raw  
E1: 103613-001-101 (20x dil.)  
GQN: 4.2

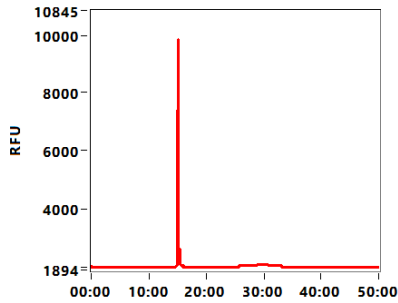

2019 06 18 14H 35M.raw  
F1: 103613-001-102 (20x dil.)  
GQN: 4.2

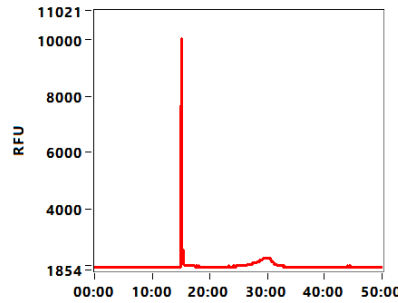

2019 06 18 14H 35M.raw  
G1: 103613-001-103 (20x dil.)  
GQN: 4.4

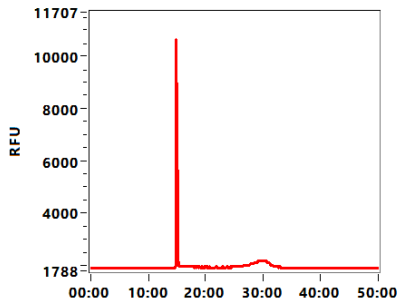

2019 06 18 14H 35M.raw  
H1: 103613-001-104 (20x dil.)  
GQN: 2.6

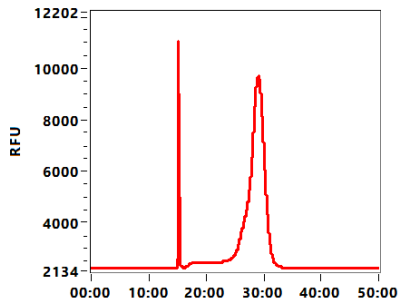

2019 06 18 14H 35M.raw  
A2: 103613-001-105 (20x dil.)  
GQN: 3.8

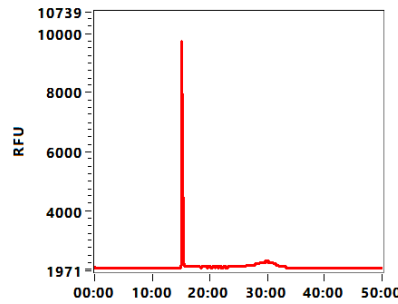

2019 06 18 14H 35M.raw  
B2: 103613-001-106 (20x dil.)  
GQN: 3.3

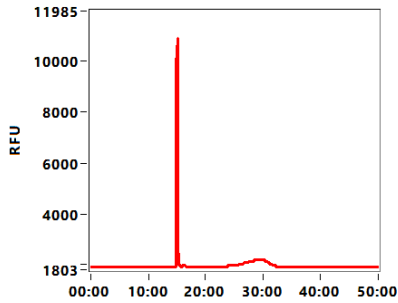

2019 06 18 14H 35M.raw  
C2: 103613-001-107 (20x dil.)  
GQN: 3.4

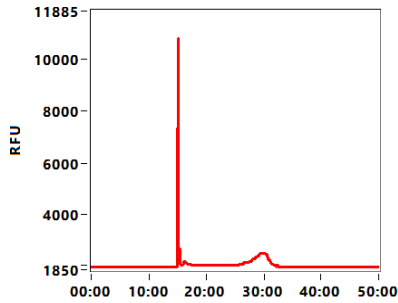

2019 06 18 14H 35M.raw  
D2: 103613-001-108 (20x dil.)  
GQN: 5.1

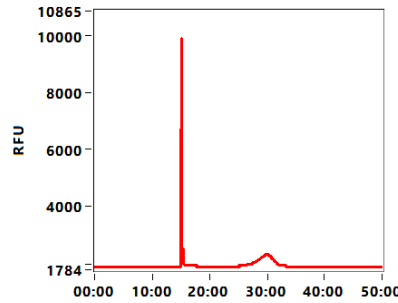

2019 06 18 14H 35M.raw  
E2: 103613-001-109 (20x dil.)  
GQN: 4.0

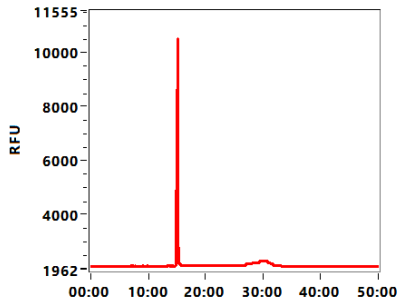

2019 06 18 14H 35M.raw  
F2: 103613-001-110 (20x dil.)  
GQN: 3.3

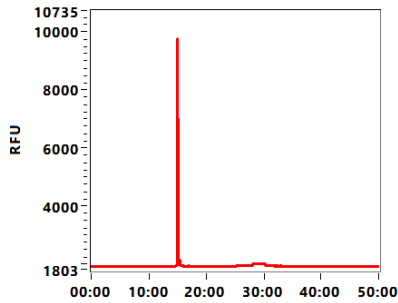

2019 06 18 14H 35M.raw  
G2: 103613-001-111 (20x dil.)  
GQN: 2.3

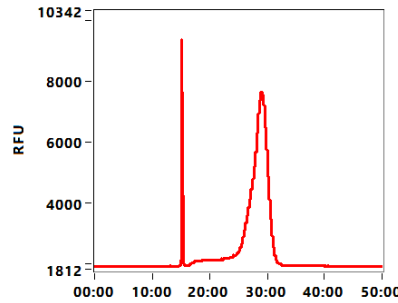

2019 06 18 14H 35M.raw  
H2: 103613-001-112 (20x dil.)  
GQN: 2.5

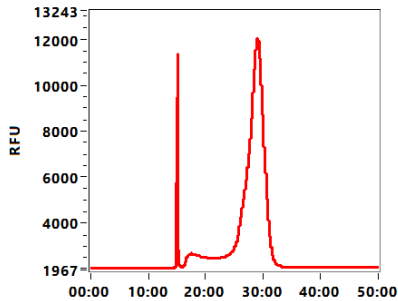

2019 06 18 14H 35M.raw  
A3: 103613-001-113 (20x dil.)  
GQN: 3.0

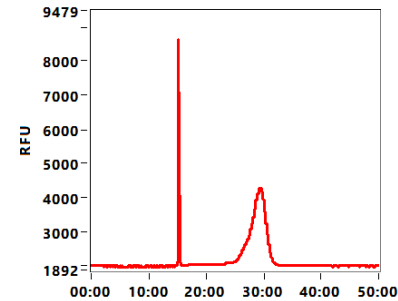

2019 06 18 14H 35M.raw  
B3: 103613-001-114 (20x dil.)  
GQN: 0.2

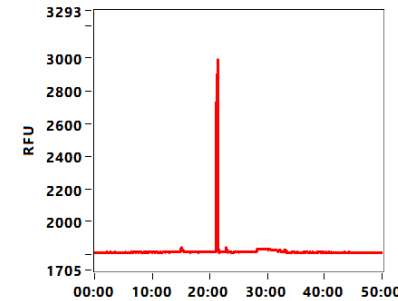

2019 06 18 14H 35M.raw  
C3: 103613-001-115 (20x dil.)  
GQN: 5.7

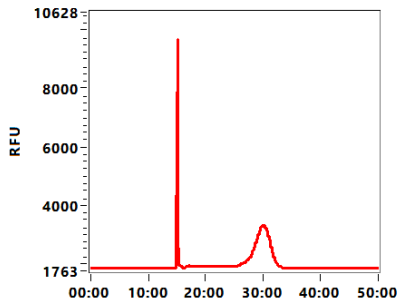

2019 06 18 14H 35M.raw  
D3: 103613-001-116 (20x dil.)  
GQN: 1.7

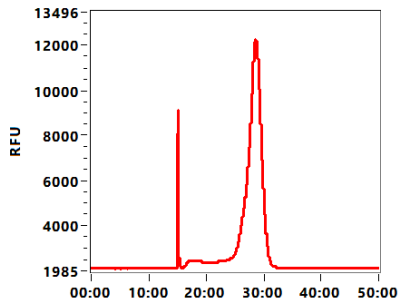

2019 06 18 14H 35M.raw  
E3: 103613-001-117 (20x dil.)  
GQN: 3.4

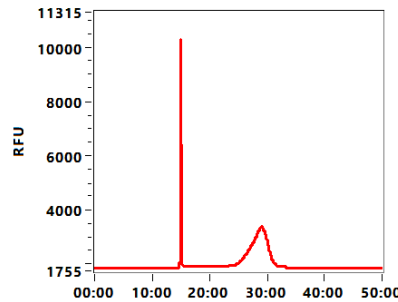

2019 06 18 14H 35M.raw  
F3: 103613-001-118 (20x dil.)  
GQN: 3.8

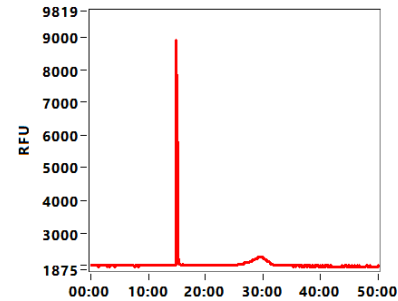

2019 06 18 14H 35M.raw  
G3: 103613-001-119 (20x dil.)  
GQN: 3.3

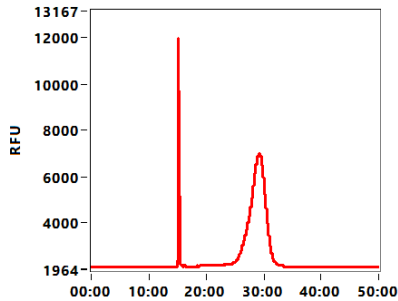

2019 06 18 14H 35M.raw  
H3: 103613-001-120 (20x dil.)  
GQN: 3.7

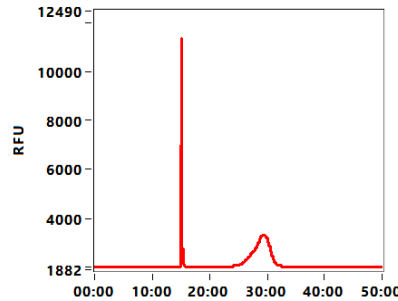

2019 06 18 14H 35M.raw  
A4: 103613-001-121 (20x dil.)  
GQN: 2.1

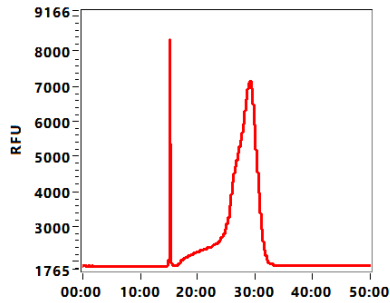

2019 06 18 14H 35M.raw  
B4: 103613-001-122 (20x dil.)  
GQN: 3.9

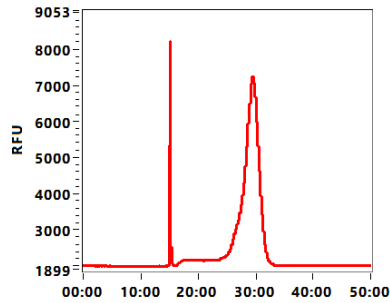

2019 06 18 14H 35M.raw  
C4: 103613-001-123 (20x dil.)  
GQN: 3.0

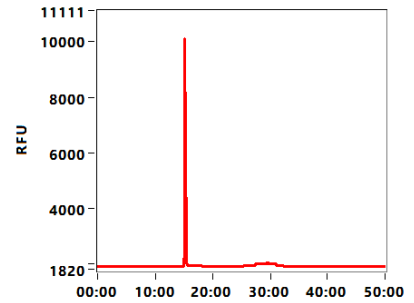

2019 06 18 14H 35M.raw  
D4: 103613-001-124 (20x dil.)  
GQN: 2.6

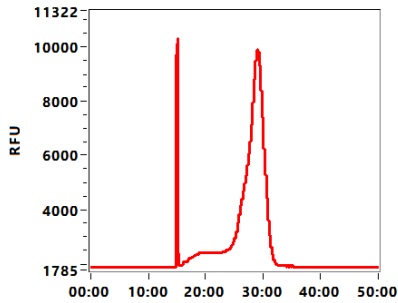

2019 06 18 14H 35M.raw  
E4: 103613-001-125 (20x dil.)  
GQN: 3.5

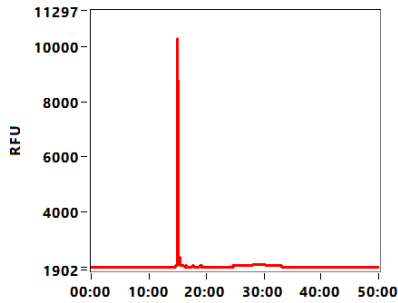

2019 06 18 14H 35M.raw  
F4: 103613-001-126 (20x dil.)  
GQN: 2.8

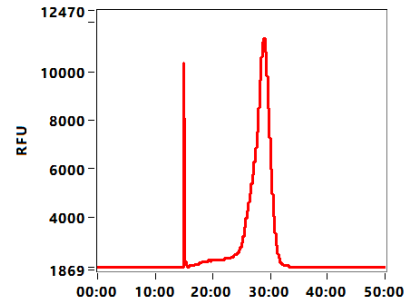

2019 06 18 14H 35M.raw  
G4: 103613-001-127 (20x dil.)  
GQN: 3.5

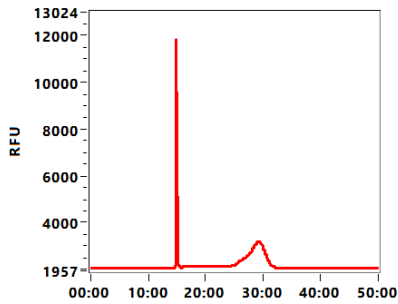

2019 06 18 14H 35M.raw  
H4: 103613-001-128 (20x dil.)  
GQN: 3.1

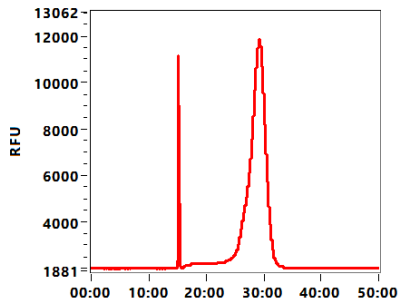

2019 06 18 14H 35M.raw  
A5: 103613-001-129 (20x dil.)  
GQN: 3.6

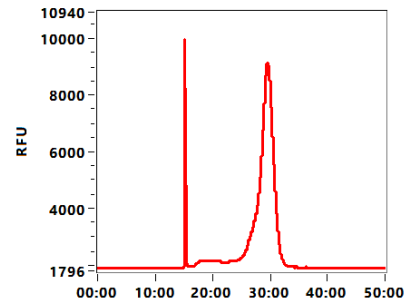

2019 06 18 14H 35M.raw  
B5: 103613-001-130 (20x dil.)  
GQN: 4.4

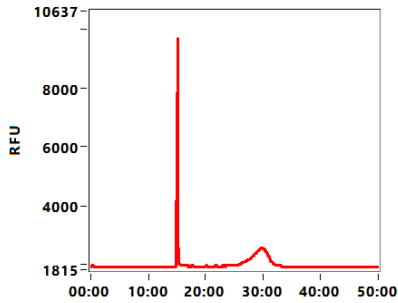

2019 06 18 14H 35M.raw  
C5: 103613-001-131 (20x dil.)  
GQN: 3.8

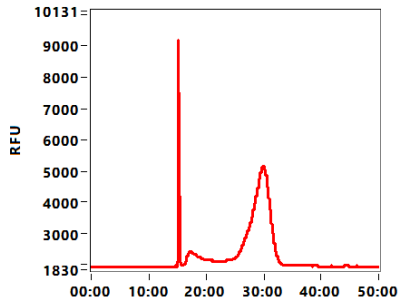

2019 06 18 14H 35M.raw  
D5: 103613-001-132 (20x dil.)  
GQN: 5.5

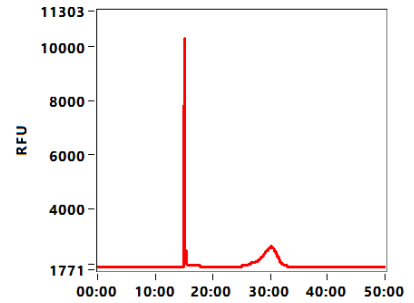

2019 06 18 14H 35M.raw  
E5: 103613-001-133 (20x dil.)  
GQN: 5.5

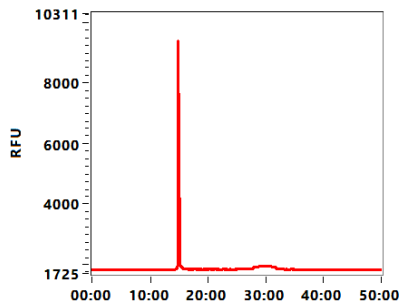

2019 06 18 14H 35M.raw  
F5: 103613-001-134 (20x dil.)  
GQN: 2.9

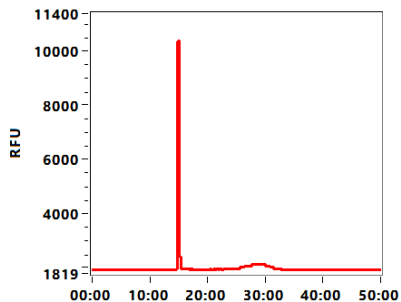

2019 06 18 14H 35M.raw  
G5: 103613-001-135 (20x dil.)  
GQN: 1.4

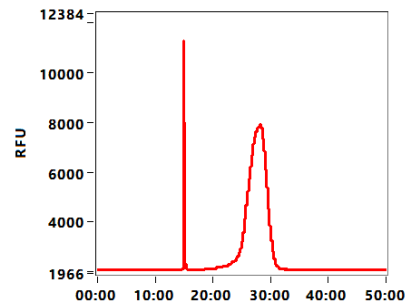

2019 06 18 14H 35M.raw  
H5: 103613-001-136 (20x dil.)  
GQN: 3.1

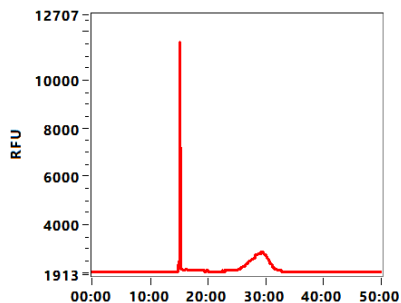

2019 06 18 14H 35M.raw  
A6: 103613-001-137 (20x dil.)  
GQN: 4.7

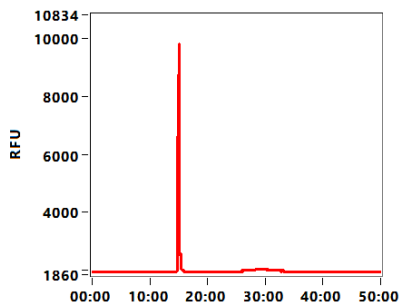

2019 06 18 14H 35M.raw  
B6: 103613-001-138 (20x dil.)  
GQN: 3.1

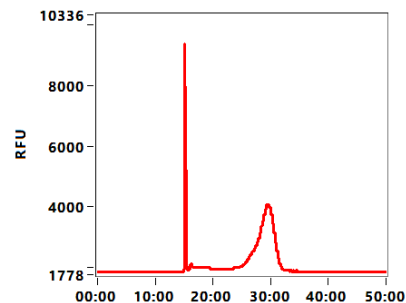



Data File: 2019 06 18 13H 16M.raw

Sample: 103613-001-001 (20x dil.)

Well Location: A1

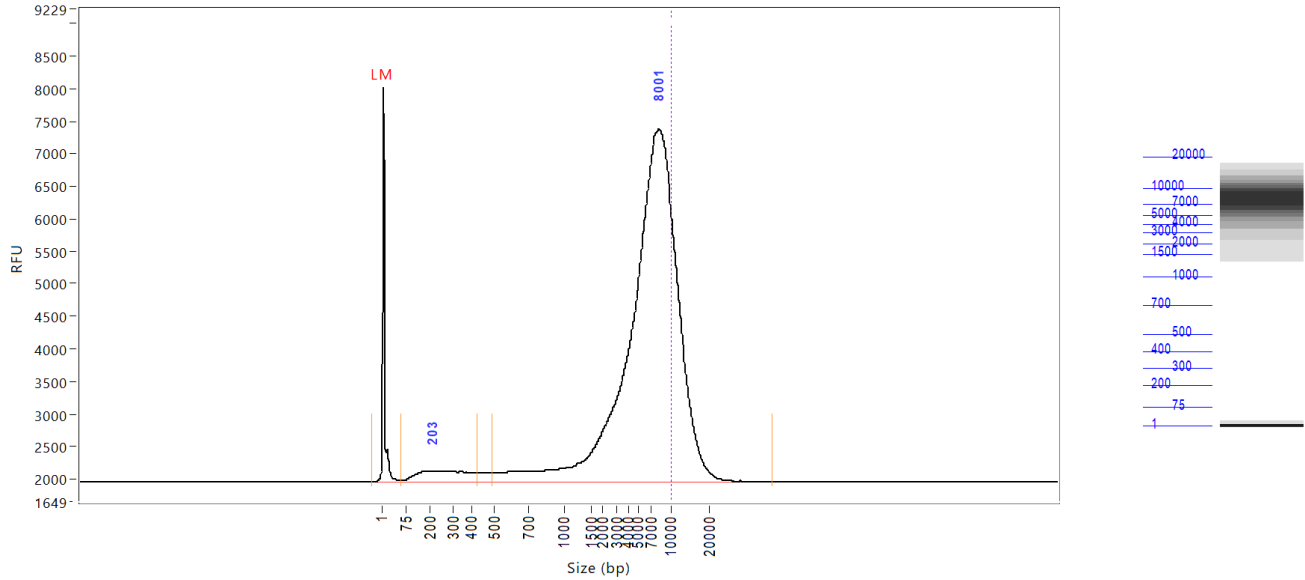

| Peak         | Size (bp) | Conc. (ng/uL) | From (bp) | To (bp) | Avg. Size (bp) | CV%    | RFU  | Corr. Peak Area |
|--------------|-----------|---------------|-----------|---------|----------------|--------|------|-----------------|
| 1            | 1 (LM)    | 0.0328        | 0         | 56      | 3              | 280.95 | 6056 | 42.247          |
| 2            | 203       | 0.2466        | 56        | 419     | 248            | 37.82  | 157  | 26.461          |
| 3            | 8001      | 5.0462        | 486       | 36480   | 7090           | 54.34  | 5427 | 541.573         |
| TIC:         |           | 5.2927        | ng/uL     |         |                |        |      |                 |
| TIM:         |           | 2.8068        | nmole/L   |         |                |        |      |                 |
| Total Conc.: |           | 5.3387        | ng/uL     |         |                |        |      |                 |
| GQN:         |           | 1.9           |           |         |                |        |      |                 |

Sample Peak Width (sec): 50    Sample Min Peak Height: 50    Sample Baseline V to V?: Y    Sample Baseline V to V pts: 3  
 Sample Filter: Binomial    # of Pts for Filter: 3    Sample Start Region (min): 0    Sample End Region (min): 50  
 Manual Baseline Start (min): 6    Manual Baseline End (min): 48  
 Marker Peak Width (sec): 5    Marker Min Peak Height: 200    Marker Baseline V to V?: Y    Marker Baseline V to V pts: 3  
 Lower Marker Selection: First Peak > 200 RFU    Upper Marker Selection: Last Peak > 200 RFU  
 Ladder Size (bp): 1, 75, 200, 300, 400, 500, 700, 1000, 1500, 2000, 3000, 4000, 5000, 7000, 10000, 20000  
 Quantification Using: Ladder    Final Concentration (ng/uL): 1.0417    Dilution Factor: 12.0  
 Size Threshold (b.p.): 10000

Data File: 2019 06 18 13H 16M.raw

Sample: 103613-001-002 (20x dil.)

Well Location: B1

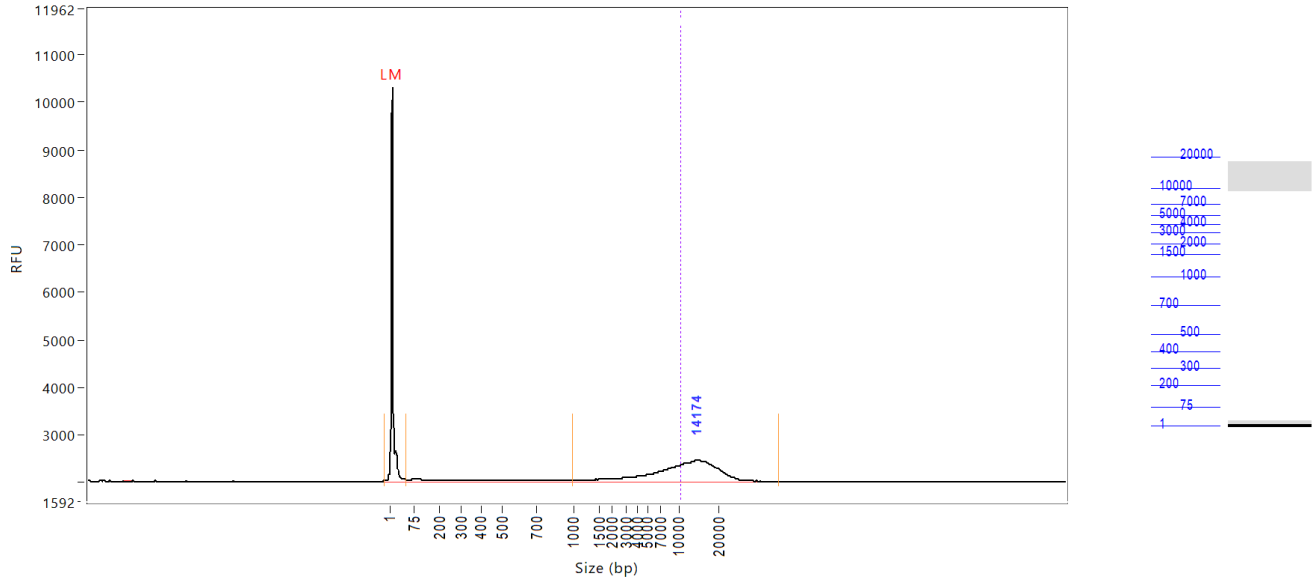

| Peak         | Size (bp) | Conc. (ng/uL) | From (bp) | To (bp) | Avg. Size (bp) | CV%    | RFU  | Corr. Peak Area |
|--------------|-----------|---------------|-----------|---------|----------------|--------|------|-----------------|
| 1            | 1 (LM)    | 0.0328        | 0         | 46      | 2              | 343.71 | 8281 | 57.356          |
| 2            | 14174     | 0.4549        | 997       | 36049   | 11681          | 53.01  | 440  | 66.280          |
| TIC:         |           | 0.4549        | ng/uL     |         |                |        |      |                 |
| TIM:         |           | 0.0641        | nmole/L   |         |                |        |      |                 |
| Total Conc.: |           | 0.5140        | ng/uL     |         |                |        |      |                 |
| GQN:         |           | 5.0           |           |         |                |        |      |                 |

Sample Peak Width (sec): 50    Sample Min Peak Height: 50    Sample Baseline V to V?: Y    Sample Baseline V to V pts: 3  
Sample Filter: Binomial    # of Pts for Filter: 3    Sample Start Region (min): 0    Sample End Region (min): 50  
Manual Baseline Start (min): 6    Manual Baseline End (min): 48  
Marker Peak Width (sec): 5    Marker Min Peak Height: 200    Marker Baseline V to V?: Y    Marker Baseline V to V pts: 3  
Lower Marker Selection: First Peak > 200 RFU    Upper Marker Selection: Last Peak > 200 RFU  
Ladder Size (bp): 1, 75, 200, 300, 400, 500, 700, 1000, 1500, 2000, 3000, 4000, 5000, 7000, 10000, 20000  
Quantification Using: Ladder    Final Concentration (ng/uL): 1.0417    Dilution Factor: 12.0  
Size Threshold (b.p.): 10000

Data File: 2019 06 18 13H 16M.raw

Sample: 103613-001-003 (20x dil.)

Well Location: C1

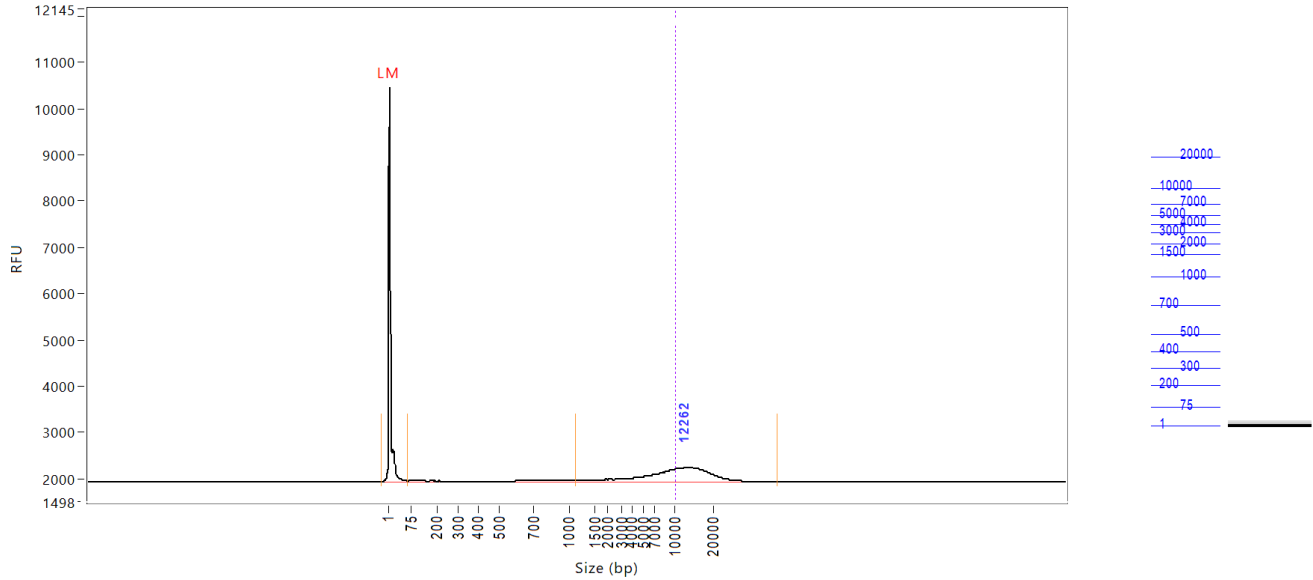

| Peak         | Size (bp) | Conc. (ng/uL) | From (bp) | To (bp) | Avg. Size (bp) | CV%    | RFU  | Corr. Peak Area |
|--------------|-----------|---------------|-----------|---------|----------------|--------|------|-----------------|
| 1            | 1 (LM)    | 0.0328        | 0         | 59      | 3              | 256.52 | 8511 | 60.187          |
| 2            | 12262     | 0.2970        | 1107      | 37084   | 11211          | 54.12  | 302  | 45.409          |
| TIC:         |           | 0.2970        | ng/uL     |         |                |        |      |                 |
| TIM:         |           | 0.0436        | nmole/L   |         |                |        |      |                 |
| Total Conc.: |           | 0.3388        | ng/uL     |         |                |        |      |                 |
| GQN:         |           | 4.6           |           |         |                |        |      |                 |

Sample Peak Width (sec): 50    Sample Min Peak Height: 50    Sample Baseline V to V?: Y    Sample Baseline V to V pts: 3  
 Sample Filter: Binomial    # of Pts for Filter: 3    Sample Start Region (min): 0    Sample End Region (min): 50  
 Manual Baseline Start (min): 6    Manual Baseline End (min): 48  
 Marker Peak Width (sec): 5    Marker Min Peak Height: 200    Marker Baseline V to V?: Y    Marker Baseline V to V pts: 3  
 Lower Marker Selection: First Peak > 200 RFU    Upper Marker Selection: Last Peak > 200 RFU  
 Ladder Size (bp): 1, 75, 200, 300, 400, 500, 700, 1000, 1500, 2000, 3000, 4000, 5000, 7000, 10000, 20000  
 Quantification Using: Ladder    Final Concentration (ng/uL): 1.0417    Dilution Factor: 12.0  
 Size Threshold (b.p.): 10000

Data File: 2019 06 18 13H 16M.raw

Sample: 103613-001-004 (20x dil.)

Well Location: D1

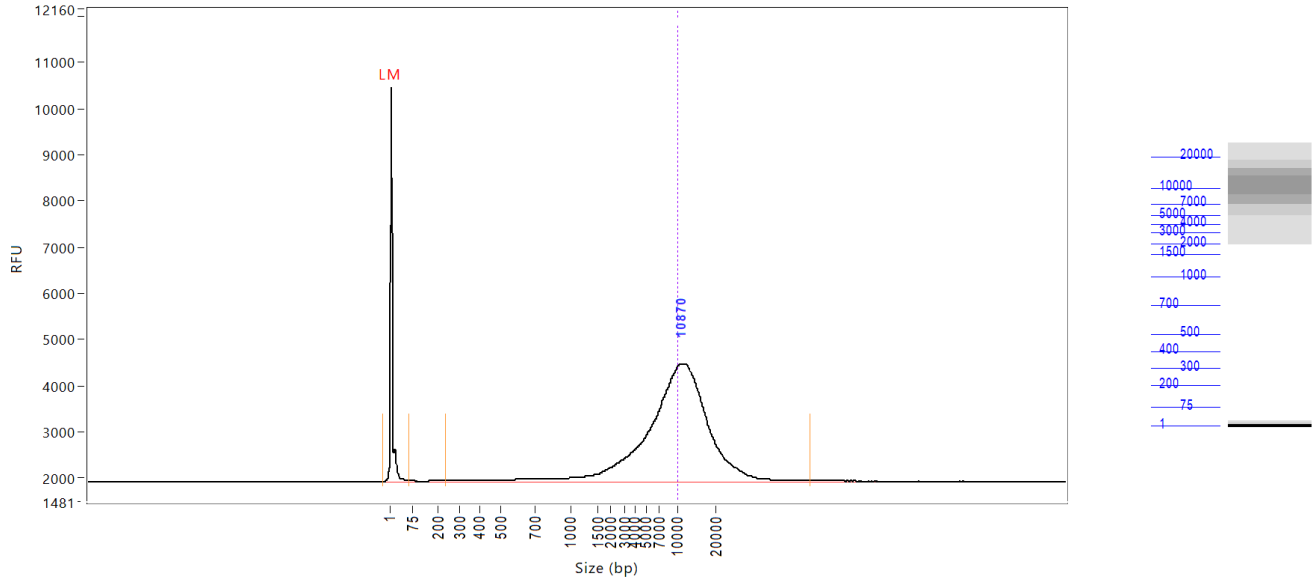

| Peak         | Size (bp) | Conc. (ng/uL) | From (bp) | To (bp) | Avg. Size (bp) | CV%    | RFU  | Corr. Peak Area |
|--------------|-----------|---------------|-----------|---------|----------------|--------|------|-----------------|
| 1            | 1 (LM)    | 0.0328        | 0         | 59      | 3              | 259.85 | 8534 | 60.185          |
| 2            | 10870     | 2.3670        | 231       | 44419   | 10369          | 60.76  | 2547 | 361.906         |
| TIC:         |           | 2.3670        | ng/uL     |         |                |        |      |                 |
| TIM:         |           | 0.3758        | nmole/L   |         |                |        |      |                 |
| Total Conc.: |           | 2.3934        | ng/uL     |         |                |        |      |                 |
| GQN:         |           | 4.7           |           |         |                |        |      |                 |

Sample Peak Width (sec): 50    Sample Min Peak Height: 50    Sample Baseline V to V?: Y    Sample Baseline V to V pts: 3  
 Sample Filter: Binomial    # of Pts for Filter: 3    Sample Start Region (min): 0    Sample End Region (min): 50  
 Manual Baseline Start (min): 6    Manual Baseline End (min): 48  
 Marker Peak Width (sec): 5    Marker Min Peak Height: 200    Marker Baseline V to V?: Y    Marker Baseline V to V pts: 3  
 Lower Marker Selection: First Peak > 200 RFU    Upper Marker Selection: Last Peak > 200 RFU  
 Ladder Size (bp): 1, 75, 200, 300, 400, 500, 700, 1000, 1500, 2000, 3000, 4000, 5000, 7000, 10000, 20000  
 Quantification Using: Ladder    Final Concentration (ng/uL): 1.0417    Dilution Factor: 12.0  
 Size Threshold (b.p.): 10000

Data File: 2019 06 18 13H 16M.raw

Sample: 103613-001-005 (20x dil.)

Well Location: E1

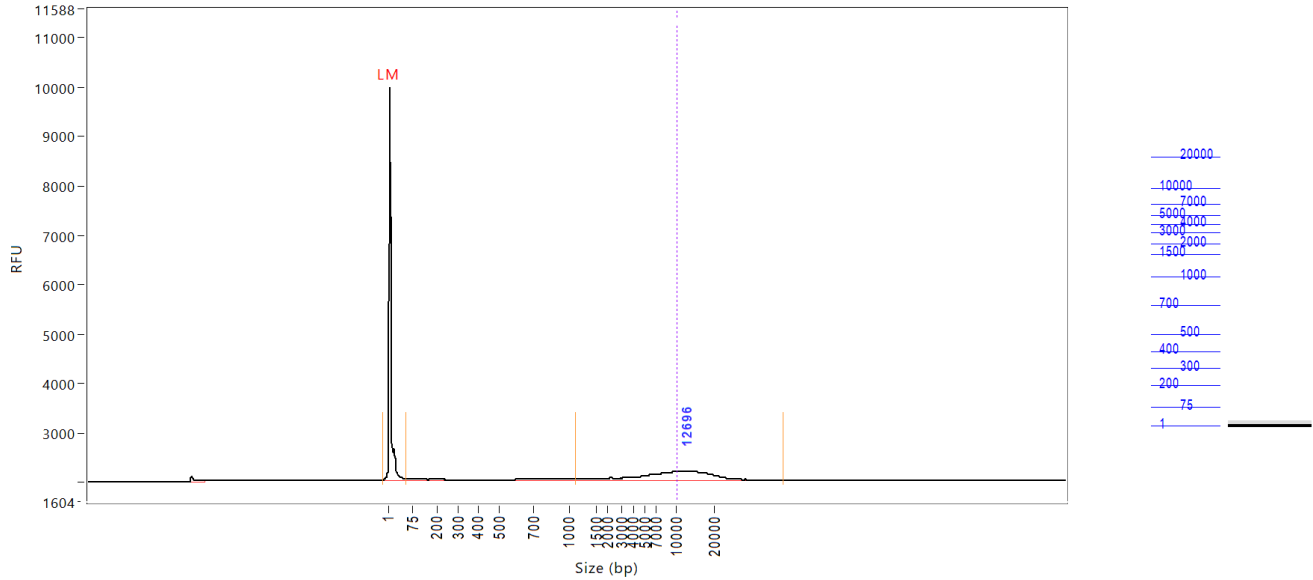

| Peak         | Size (bp) | Conc. (ng/uL) | From (bp) | To (bp) | Avg. Size (bp) | CV%    | RFU  | Corr. Peak Area |
|--------------|-----------|---------------|-----------|---------|----------------|--------|------|-----------------|
| 1            | 1 (LM)    | 0.0328        | 0         | 54      | 2              | 365.43 | 7947 | 55.740          |
| 2            | 12696     | 0.2140        | 1088      | 38034   | 10697          | 59.39  | 178  | 30.302          |
| TIC:         |           | 0.2140        | ng/uL     |         |                |        |      |                 |
| TIM:         |           | 0.0329        | nmole/L   |         |                |        |      |                 |
| Total Conc.: |           | 0.2547        | ng/uL     |         |                |        |      |                 |
| GQN:         |           | 4.1           |           |         |                |        |      |                 |

Sample Peak Width (sec): 50    Sample Min Peak Height: 50    Sample Baseline V to V?: Y    Sample Baseline V to V pts: 3  
 Sample Filter: Binomial    # of Pts for Filter: 3    Sample Start Region (min): 0    Sample End Region (min): 50  
 Manual Baseline Start (min): 6    Manual Baseline End (min): 48  
 Marker Peak Width (sec): 5    Marker Min Peak Height: 200    Marker Baseline V to V?: Y    Marker Baseline V to V pts: 3  
 Lower Marker Selection: First Peak > 200 RFU    Upper Marker Selection: Last Peak > 200 RFU  
 Ladder Size (bp): 1, 75, 200, 300, 400, 500, 700, 1000, 1500, 2000, 3000, 4000, 5000, 7000, 10000, 20000  
 Quantification Using: Ladder    Final Concentration (ng/uL): 1.0417    Dilution Factor: 12.0  
 Size Threshold (b.p.): 10000

Data File: 2019 06 18 13H 16M.raw

Sample: 103613-001-006 (20x dil.)

Well Location: F1

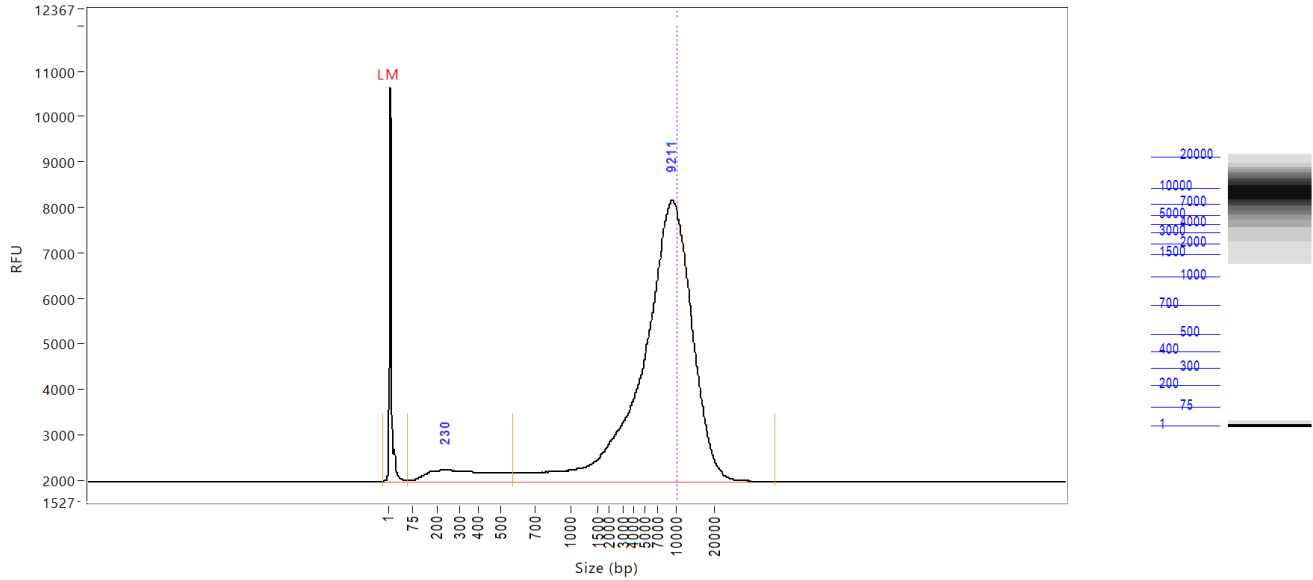

| Peak         | Size (bp) | Conc. (ng/uL) | From (bp) | To (bp) | Avg. Size (bp) | CV%    | RFU  | Corr. Peak Area |
|--------------|-----------|---------------|-----------|---------|----------------|--------|------|-----------------|
| 1            | 1 (LM)    | 0.0328        | 0         | 57      | 2              | 334.49 | 8665 | 60.067          |
| 2            | 230       | 0.3396        | 57        | 567     | 311            | 41.82  | 241  | 51.817          |
| 3            | 9211      | 4.4060        | 567       | 35704   | 8173           | 55.01  | 6185 | 672.339         |
| TIC:         |           | 4.7456        | ng/uL     |         |                |        |      |                 |
| TIM:         |           | 2.6836        | nmole/L   |         |                |        |      |                 |
| Total Conc.: |           | 4.7625        | ng/uL     |         |                |        |      |                 |
| GQN:         |           | 2.9           |           |         |                |        |      |                 |

Sample Peak Width (sec): 50    Sample Min Peak Height: 50    Sample Baseline V to V?: Y    Sample Baseline V to V pts: 3  
 Sample Filter: Binomial    # of Pts for Filter: 3    Sample Start Region (min): 0    Sample End Region (min): 50  
 Manual Baseline Start (min): 6    Manual Baseline End (min): 48  
 Marker Peak Width (sec): 5    Marker Min Peak Height: 200    Marker Baseline V to V?: Y    Marker Baseline V to V pts: 3  
 Lower Marker Selection: First Peak > 200 RFU    Upper Marker Selection: Last Peak > 200 RFU  
 Ladder Size (bp): 1, 75, 200, 300, 400, 500, 700, 1000, 1500, 2000, 3000, 4000, 5000, 7000, 10000, 20000  
 Quantification Using: Ladder    Final Concentration (ng/uL): 1.0417    Dilution Factor: 12.0  
 Size Threshold (b.p.): 10000

Data File: 2019 06 18 13H 16M.raw

Sample: 103613-001-007 (20x dil.)

Well Location: G1

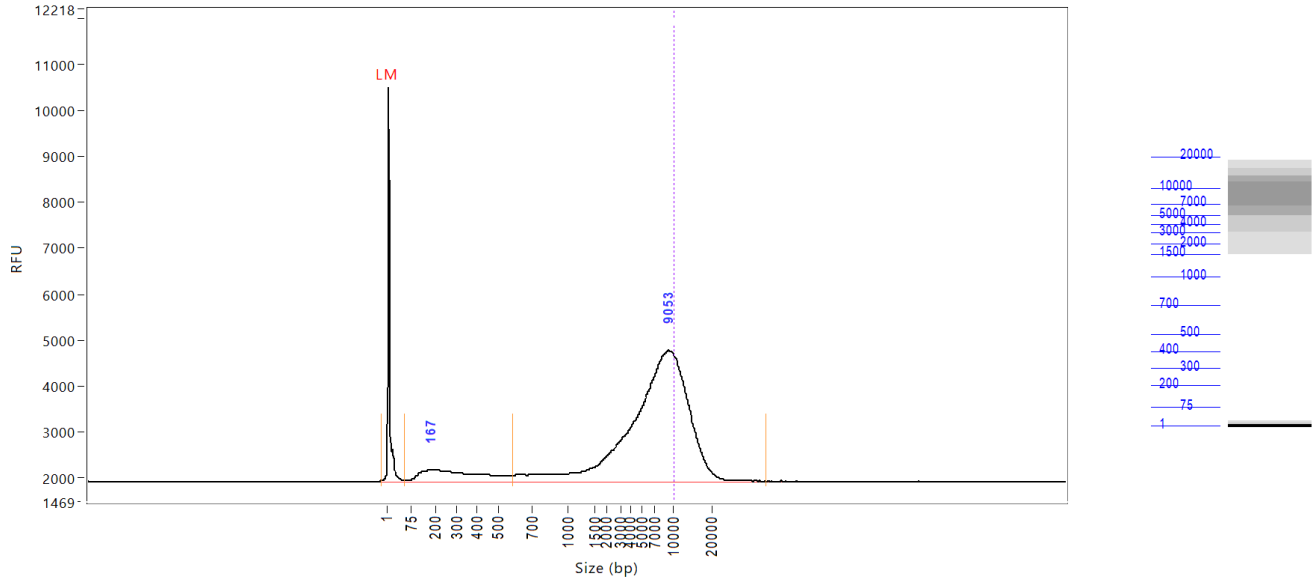

| Peak         | Size (bp) | Conc. (ng/uL) | From (bp) | To (bp) | Avg. Size (bp) | CV%    | RFU  | Corr. Peak Area |
|--------------|-----------|---------------|-----------|---------|----------------|--------|------|-----------------|
| 1            | 1 (LM)    | 0.0328        | 0         | 55      | 2              | 294.31 | 8583 | 59.634          |
| 2            | 167       | 0.3037        | 55        | 585     | 290            | 47.05  | 252  | 46.010          |
| 3            | 9053      | 2.3135        | 585       | 34582   | 7645           | 59.79  | 2849 | 350.487         |
| TIC:         |           | 2.6172        | ng/uL     |         |                |        |      |                 |
| TIM:         |           | 2.2208        | nmole/L   |         |                |        |      |                 |
| Total Conc.: |           | 2.6384        | ng/uL     |         |                |        |      |                 |
| GQN:         |           | 2.4           |           |         |                |        |      |                 |

Sample Peak Width (sec): 50    Sample Min Peak Height: 50    Sample Baseline V to V?: Y    Sample Baseline V to V pts: 3  
 Sample Filter: Binomial    # of Pts for Filter: 3    Sample Start Region (min): 0    Sample End Region (min): 50  
 Manual Baseline Start (min): 6    Manual Baseline End (min): 48  
 Marker Peak Width (sec): 5    Marker Min Peak Height: 200    Marker Baseline V to V?: Y    Marker Baseline V to V pts: 3  
 Lower Marker Selection: First Peak > 200 RFU    Upper Marker Selection: Last Peak > 200 RFU  
 Ladder Size (bp): 1, 75, 200, 300, 400, 500, 700, 1000, 1500, 2000, 3000, 4000, 5000, 7000, 10000, 20000  
 Quantification Using: Ladder    Final Concentration (ng/uL): 1.0417    Dilution Factor: 12.0  
 Size Threshold (b.p.): 10000

Data File: 2019 06 18 13H 16M.raw

Sample: 103613-001-008 (20x dil.)

Well Location: H1

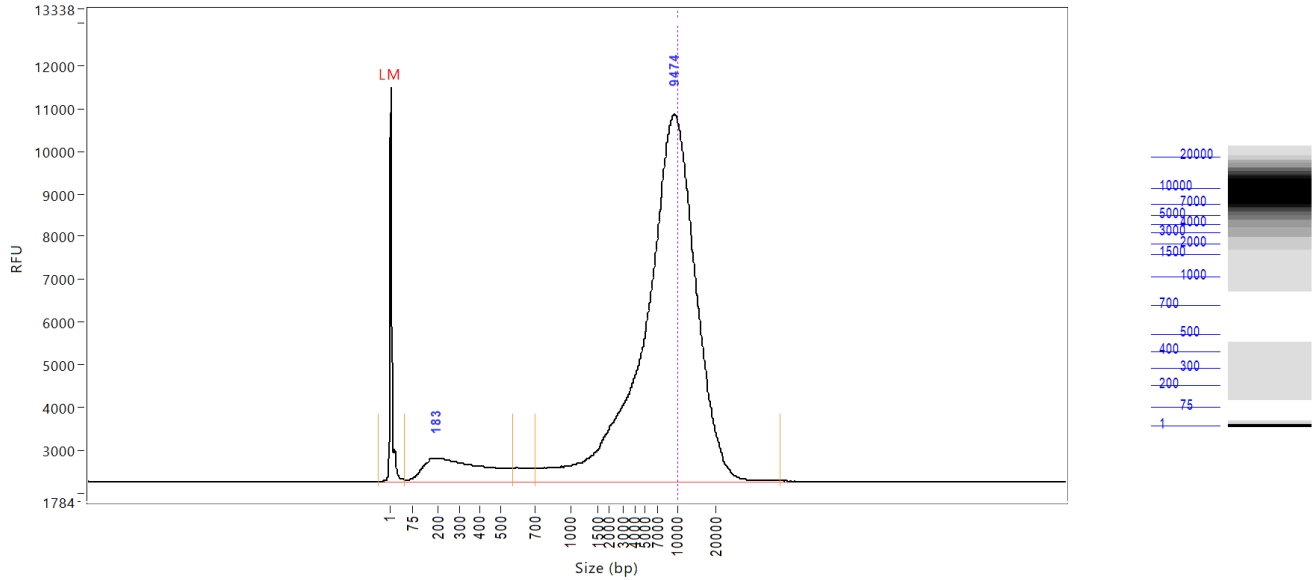

| Peak         | Size (bp) | Conc. (ng/uL) | From (bp) | To (bp) | Avg. Size (bp) | CV%    | RFU  | Corr. Peak Area |
|--------------|-----------|---------------|-----------|---------|----------------|--------|------|-----------------|
| 1            | 1 (LM)    | 0.0328        | 0         | 45      | 2              | 298.31 | 9229 | 64.057          |
| 2            | 183       | 0.6409        | 45        | 569     | 294            | 44.68  | 535  | 104.289         |
| 3            | 9474      | 6.0779        | 700       | 36912   | 8699           | 55.71  | 8601 | 989.062         |
| TIC:         |           | 6.7187        | ng/uL     |         |                |        |      |                 |
| TIM:         |           | 4.7358        | nmole/L   |         |                |        |      |                 |
| Total Conc.: |           | 6.8325        | ng/uL     |         |                |        |      |                 |
| GQN:         |           | 3.1           |           |         |                |        |      |                 |

Sample Peak Width (sec): 50    Sample Min Peak Height: 50    Sample Baseline V to V?: Y    Sample Baseline V to V pts: 3  
 Sample Filter: Binomial    # of Pts for Filter: 3    Sample Start Region (min): 0    Sample End Region (min): 50  
 Manual Baseline Start (min): 6    Manual Baseline End (min): 48  
 Marker Peak Width (sec): 5    Marker Min Peak Height: 200    Marker Baseline V to V?: Y    Marker Baseline V to V pts: 3  
 Lower Marker Selection: First Peak > 200 RFU    Upper Marker Selection: Last Peak > 200 RFU  
 Ladder Size (bp): 1, 75, 200, 300, 400, 500, 700, 1000, 1500, 2000, 3000, 4000, 5000, 7000, 10000, 20000  
 Quantification Using: Ladder    Final Concentration (ng/uL): 1.0417    Dilution Factor: 12.0  
 Size Threshold (b.p.): 10000



**Data File:** 2019 06 18 13H 16M.raw  
**Sample:** 103613-001-009 (20x dil.)  
**Well Location:** A2

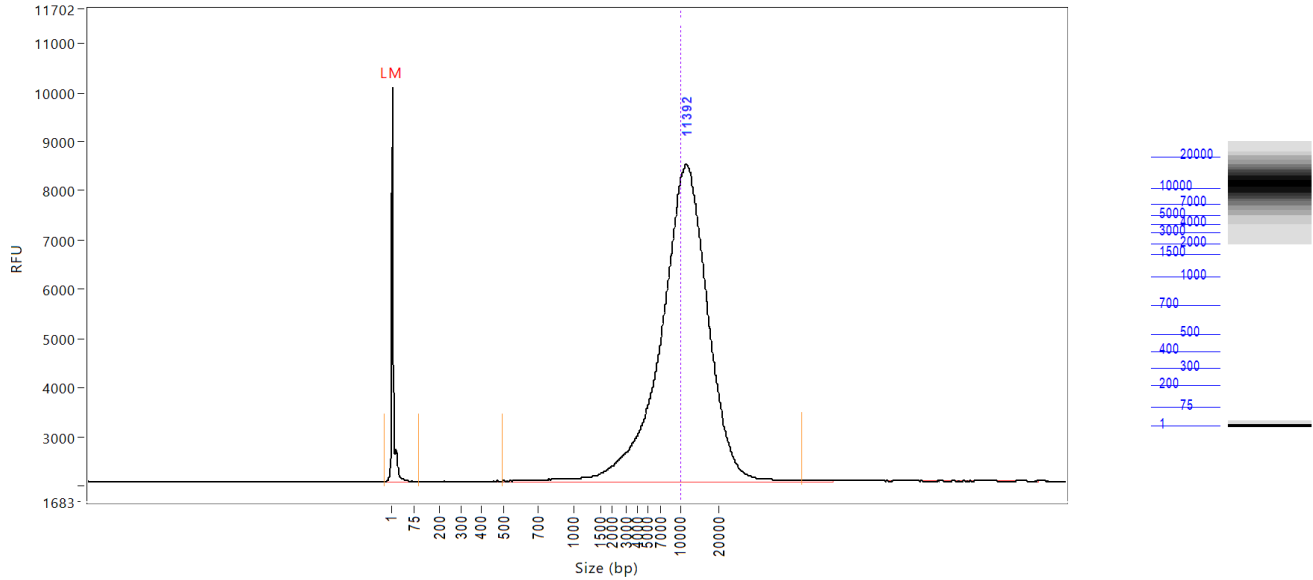

| Peak         | Size (bp) | Conc. (ng/uL) | From (bp) | To (bp) | Avg. Size (bp) | CV%    | RFU  | Corr. Peak Area |
|--------------|-----------|---------------|-----------|---------|----------------|--------|------|-----------------|
| 1            | 1 (LM)    | 0.0328        | 0         | 89      | 2              | 369.68 | 8004 | 55.378          |
| 2            | 11392     | 5.1074        | 497       | 41658   | 11116          | 46.31  | 6436 | 718.529         |
| TIC:         |           | 5.1074        | ng/uL     |         |                |        |      |                 |
| TIM:         |           | 0.7564        | nmole/L   |         |                |        |      |                 |
| Total Conc.: |           | 5.1300        | ng/uL     |         |                |        |      |                 |
| GQN:         |           | 5.5           |           |         |                |        |      |                 |

Sample Peak Width (sec): 50    Sample Min Peak Height: 50    Sample Baseline V to V?: Y    Sample Baseline V to V pts: 3  
Sample Filter: Binomial    # of Pts for Filter: 3    Sample Start Region (min): 0    Sample End Region (min): 50  
Manual Baseline Start (min): 6    Manual Baseline End (min): 48  
Marker Peak Width (sec): 5    Marker Min Peak Height: 200    Marker Baseline V to V?: Y    Marker Baseline V to V pts: 3  
Lower Marker Selection: First Peak > 200 RFU    Upper Marker Selection: Last Peak > 200 RFU  
Ladder Size (bp): 1, 75, 200, 300, 400, 500, 700, 1000, 1500, 2000, 3000, 4000, 5000, 7000, 10000, 20000  
Quantification Using: Ladder    Final Concentration (ng/uL): 1.0417    Dilution Factor: 12.0  
Size Threshold (b.p.): 10000

Data File: 2019 06 18 13H 16M.raw

Sample: 103613-001-010 (20x dil.)

Well Location: B2

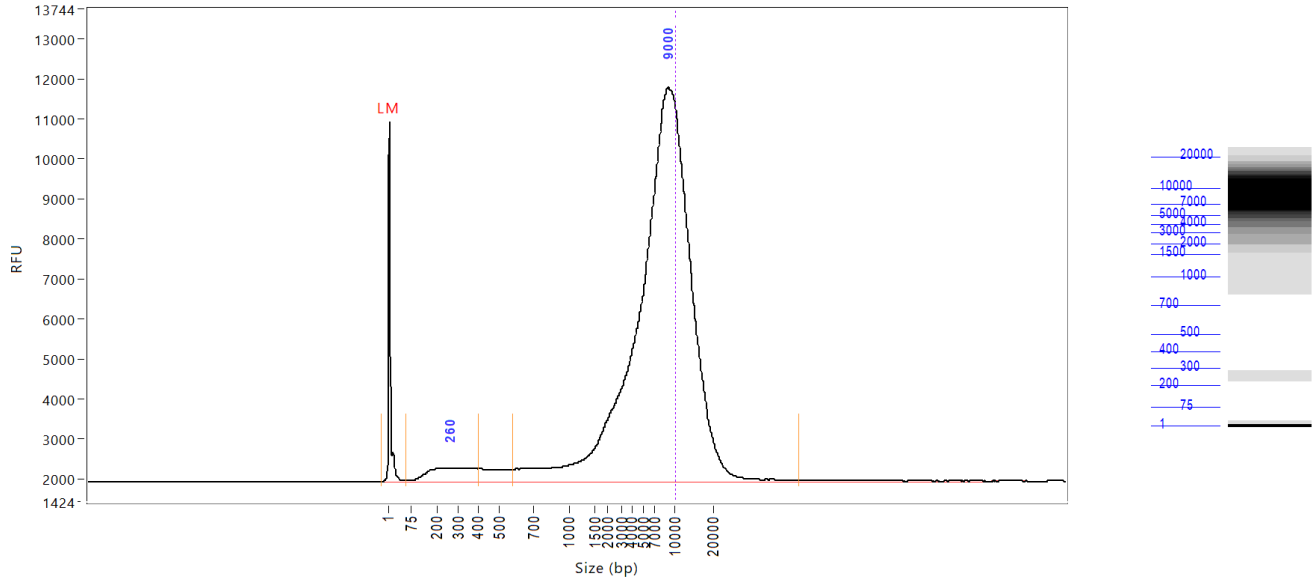

| Peak         | Size (bp) | Conc. (ng/uL) | From (bp) | To (bp) | Avg. Size (bp) | CV%    | RFU  | Corr. Peak Area |
|--------------|-----------|---------------|-----------|---------|----------------|--------|------|-----------------|
| 1            | 1 (LM)    | 0.0328        | 0         | 54      | 2              | 312.88 | 9012 | 62.003          |
| 2            | 260       | 0.3183        | 54        | 404     | 255            | 33.25  | 327  | 50.131          |
| 3            | 9000      | 7.2481        | 575       | 42520   | 8251           | 58.88  | 9839 | 1141.670        |
| TIC:         |           | 7.5664        | ng/uL     |         |                |        |      |                 |
| TIM:         |           | 3.4990        | nmole/L   |         |                |        |      |                 |
| Total Conc.: |           | 7.7485        | ng/uL     |         |                |        |      |                 |
| GQN:         |           | 2.9           |           |         |                |        |      |                 |

Sample Peak Width (sec): 50    Sample Min Peak Height: 50    Sample Baseline V to V?: Y    Sample Baseline V to V pts: 3  
 Sample Filter: Binomial    # of Pts for Filter: 3    Sample Start Region (min): 0    Sample End Region (min): 50  
 Manual Baseline Start (min): 6    Manual Baseline End (min): 48  
 Marker Peak Width (sec): 5    Marker Min Peak Height: 200    Marker Baseline V to V?: Y    Marker Baseline V to V pts: 3  
 Lower Marker Selection: First Peak > 200 RFU    Upper Marker Selection: Last Peak > 200 RFU  
 Ladder Size (bp): 1, 75, 200, 300, 400, 500, 700, 1000, 1500, 2000, 3000, 4000, 5000, 7000, 10000, 20000  
 Quantification Using: Ladder    Final Concentration (ng/uL): 1.0417    Dilution Factor: 12.0  
 Size Threshold (b.p.): 10000

**Data File:** 2019 06 18 13H 16M.raw  
**Sample:** 103613-001-011 (20x dil.)  
**Well Location:** C2

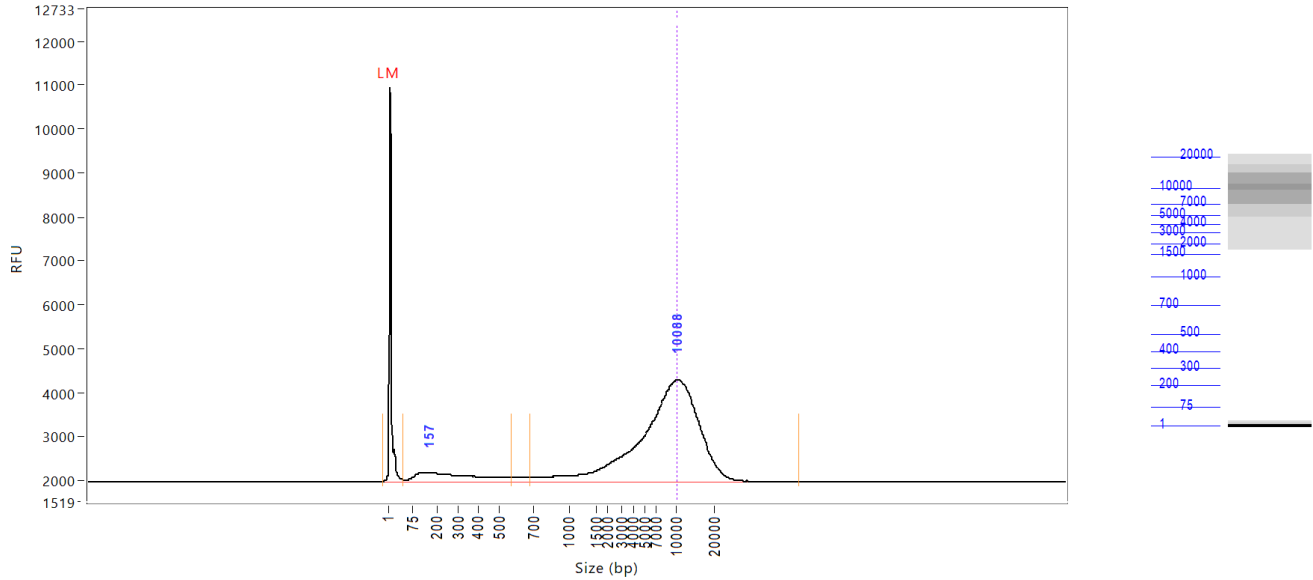

| Peak         | Size (bp) | Conc. (ng/uL) | From (bp) | To (bp) | Avg. Size (bp) | CV%    | RFU  | Corr. Peak Area |
|--------------|-----------|---------------|-----------|---------|----------------|--------|------|-----------------|
| 1            | 1 (LM)    | 0.0328        | 0         | 46      | 3              | 251.14 | 8963 | 63.299          |
| 2            | 157       | 0.2373        | 46        | 563     | 262            | 52.74  | 203  | 38.159          |
| 3            | 10088     | 1.8867        | 673       | 42089   | 8872           | 58.61  | 2315 | 303.398         |
| TIC:         |           | 2.1240        | ng/uL     |         |                |        |      |                 |
| TIM:         |           | 1.8398        | nmole/L   |         |                |        |      |                 |
| Total Conc.: |           | 2.1521        | ng/uL     |         |                |        |      |                 |
| GQN:         |           | 3.3           |           |         |                |        |      |                 |

Sample Peak Width (sec): 50    Sample Min Peak Height: 50    Sample Baseline V to V?: Y    Sample Baseline V to V pts: 3  
Sample Filter: Binomial    # of Pts for Filter: 3    Sample Start Region (min): 0    Sample End Region (min): 50  
Manual Baseline Start (min): 6    Manual Baseline End (min): 48  
Marker Peak Width (sec): 5    Marker Min Peak Height: 200    Marker Baseline V to V?: Y    Marker Baseline V to V pts: 3  
Lower Marker Selection: First Peak > 200 RFU    Upper Marker Selection: Last Peak > 200 RFU  
Ladder Size (bp): 1, 75, 200, 300, 400, 500, 700, 1000, 1500, 2000, 3000, 4000, 5000, 7000, 10000, 20000  
Quantification Using: Ladder    Final Concentration (ng/uL): 1.0417    Dilution Factor: 12.0  
Size Threshold (b.p.): 10000

**Data File:** 2019 06 18 13H 16M.raw  
**Sample:** 103613-001-012 (20x dil.)  
**Well Location:** D2

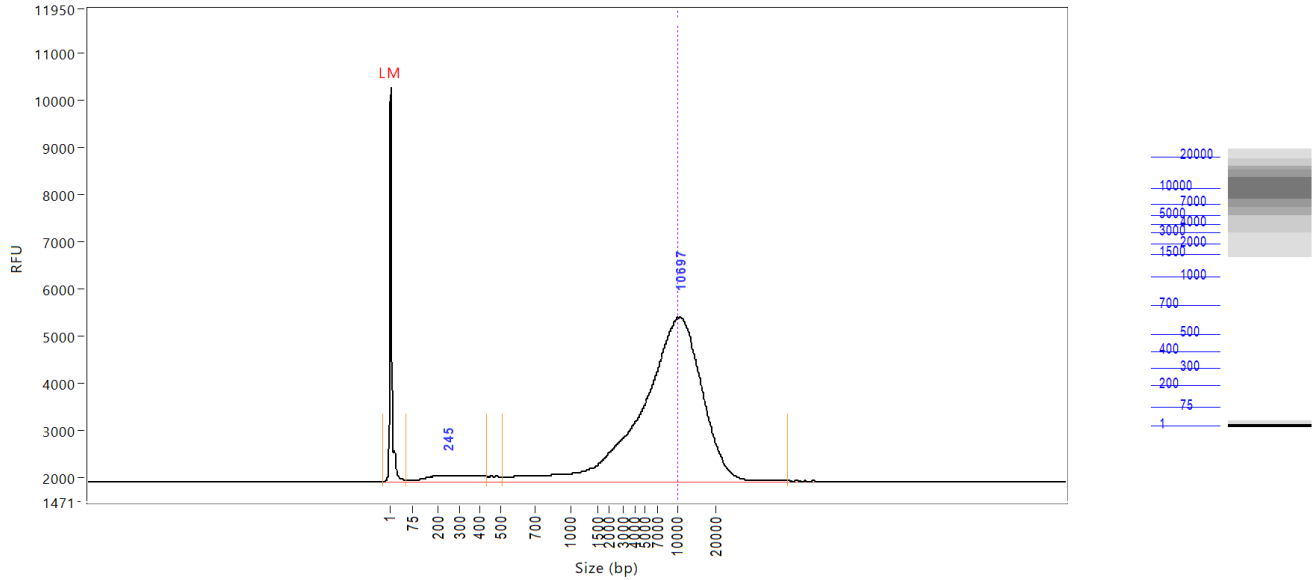

| Peak         | Size (bp) | Conc. (ng/uL) | From (bp) | To (bp) | Avg. Size (bp) | CV%    | RFU  | Corr. Peak Area |
|--------------|-----------|---------------|-----------|---------|----------------|--------|------|-----------------|
| 1            | 1 (LM)    | 0.0328        | 0         | 52      | 2              | 352.40 | 8377 | 58.911          |
| 2            | 245       | 0.1447        | 52        | 433     | 256            | 39.16  | 126  | 21.652          |
| 3            | 10697     | 3.2657        | 509       | 38983   | 9007           | 61.02  | 3497 | 488.745         |
| TIC:         |           | 3.4104        | ng/uL     |         |                |        |      |                 |
| TIM:         |           | 1.5264        | nmole/L   |         |                |        |      |                 |
| Total Conc.: |           | 3.4582        | ng/uL     |         |                |        |      |                 |
| GQN:         |           | 3.7           |           |         |                |        |      |                 |

Sample Peak Width (sec): 50    Sample Min Peak Height: 50    Sample Baseline V to V?: Y    Sample Baseline V to V pts: 3  
Sample Filter: Binomial    # of Pts for Filter: 3    Sample Start Region (min): 0    Sample End Region (min): 50  
Manual Baseline Start (min): 6    Manual Baseline End (min): 48  
Marker Peak Width (sec): 5    Marker Min Peak Height: 200    Marker Baseline V to V?: Y    Marker Baseline V to V pts: 3  
Lower Marker Selection: First Peak > 200 RFU    Upper Marker Selection: Last Peak > 200 RFU  
Ladder Size (bp): 1, 75, 200, 300, 400, 500, 700, 1000, 1500, 2000, 3000, 4000, 5000, 7000, 10000, 20000  
Quantification Using: Ladder    Final Concentration (ng/uL): 1.0417    Dilution Factor: 12.0  
Size Threshold (b.p.): 10000

Data File: 2019 06 18 13H 16M.raw

Sample: 103613-001-013 (20x dil.)

Well Location: E2

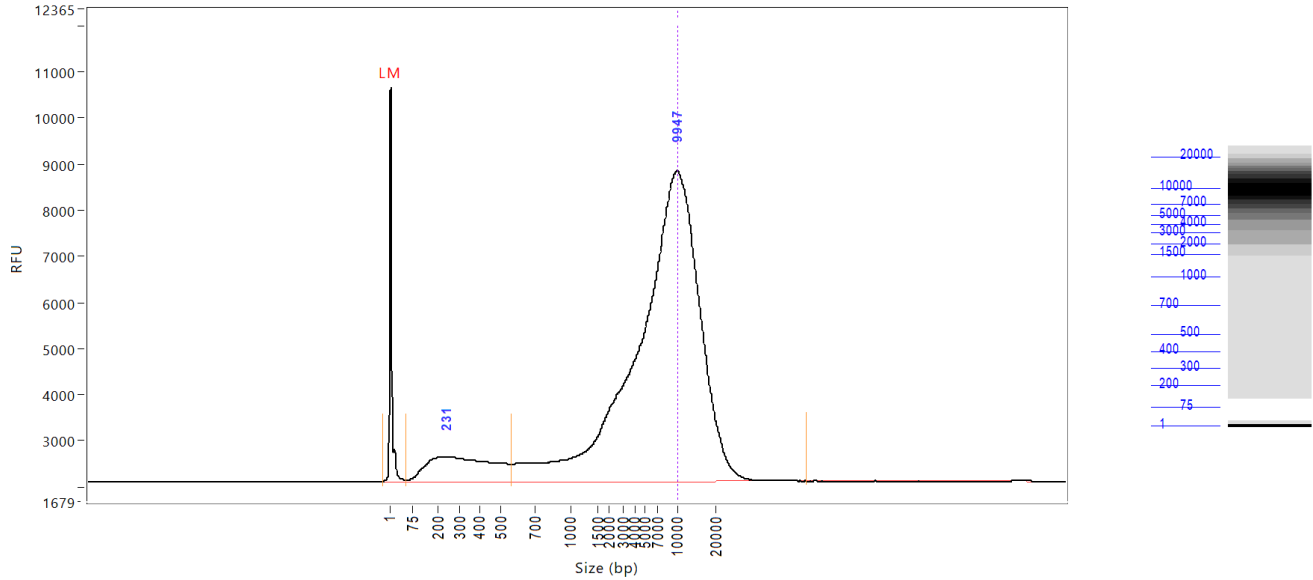

| Peak         | Size (bp) | Conc. (ng/uL) | From (bp) | To (bp) | Avg. Size (bp) | CV%    | RFU  | Corr. Peak Area |
|--------------|-----------|---------------|-----------|---------|----------------|--------|------|-----------------|
| 1            | 1 (LM)    | 0.0328        | 0         | 52      | 2              | 391.41 | 8535 | 60.521          |
| 2            | 231       | 0.7196        | 52        | 554     | 304            | 41.66  | 525  | 110.632         |
| 3            | 9947      | 6.2181        | 554       | 43556   | 8265           | 64.70  | 6748 | 956.017         |
| TIC:         |           | 6.9376        | ng/uL     |         |                |        |      |                 |
| TIM:         |           | 5.1322        | nmole/L   |         |                |        |      |                 |
| Total Conc.: |           | 6.9385        | ng/uL     |         |                |        |      |                 |
| GQN:         |           | 3.1           |           |         |                |        |      |                 |

Sample Peak Width (sec): 50    Sample Min Peak Height: 50    Sample Baseline V to V?: Y    Sample Baseline V to V pts: 3  
 Sample Filter: Binomial    # of Pts for Filter: 3    Sample Start Region (min): 0    Sample End Region (min): 50  
 Manual Baseline Start (min): 6    Manual Baseline End (min): 48  
 Marker Peak Width (sec): 5    Marker Min Peak Height: 200    Marker Baseline V to V?: Y    Marker Baseline V to V pts: 3  
 Lower Marker Selection: First Peak > 200 RFU    Upper Marker Selection: Last Peak > 200 RFU  
 Ladder Size (bp): 1, 75, 200, 300, 400, 500, 700, 1000, 1500, 2000, 3000, 4000, 5000, 7000, 10000, 20000  
 Quantification Using: Ladder    Final Concentration (ng/uL): 1.0417    Dilution Factor: 12.0  
 Size Threshold (b.p.): 10000

**Data File:** 2019 06 18 13H 16M.raw  
**Sample:** 103613-001-014 (20x dil.)  
**Well Location:** F2

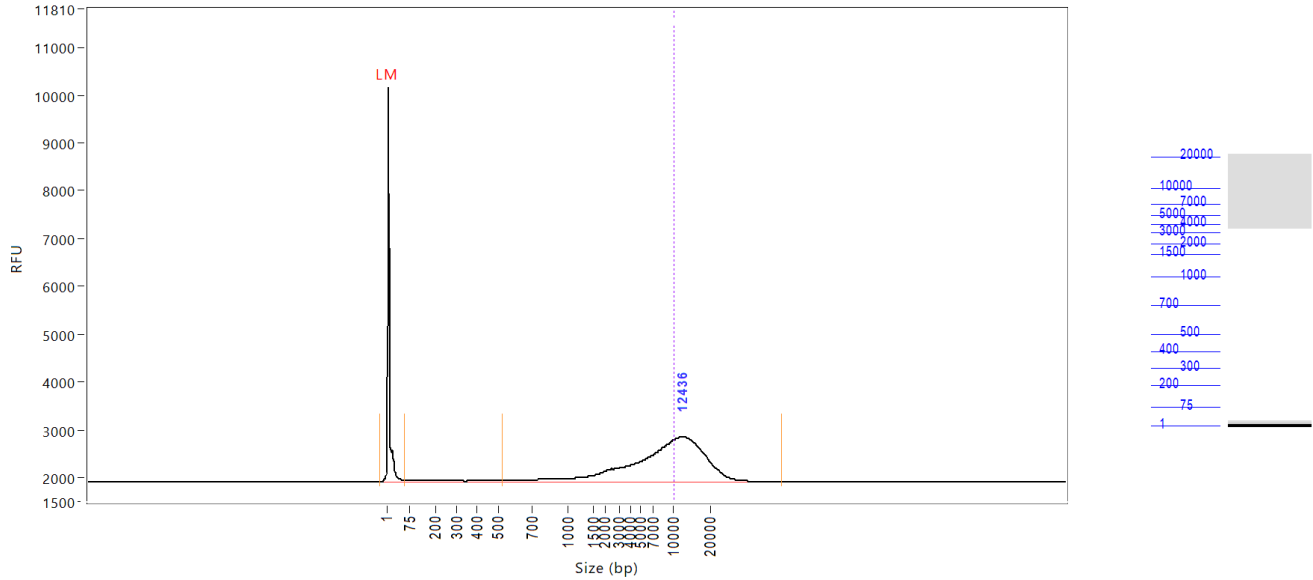

| Peak         | Size (bp) | Conc. (ng/uL) | From (bp) | To (bp) | Avg. Size (bp) | CV%    | RFU  | Corr. Peak Area |
|--------------|-----------|---------------|-----------|---------|----------------|--------|------|-----------------|
| 1            | 1 (LM)    | 0.0328        | 0         | 56      | 3              | 262.53 | 8240 | 57.864          |
| 2            | 12436     | 1.0381        | 524       | 38810   | 9648           | 63.95  | 927  | 152.600         |
| TIC:         |           | 1.0381        | ng/uL     |         |                |        |      |                 |
| TIM:         |           | 0.1771        | nmole/L   |         |                |        |      |                 |
| Total Conc.: |           | 1.0775        | ng/uL     |         |                |        |      |                 |
| GQN:         |           | 4.3           |           |         |                |        |      |                 |

Sample Peak Width (sec): 50    Sample Min Peak Height: 50    Sample Baseline V to V?: Y    Sample Baseline V to V pts: 3  
Sample Filter: Binomial    # of Pts for Filter: 3    Sample Start Region (min): 0    Sample End Region (min): 50  
Manual Baseline Start (min): 6    Manual Baseline End (min): 48  
Marker Peak Width (sec): 5    Marker Min Peak Height: 200    Marker Baseline V to V?: Y    Marker Baseline V to V pts: 3  
Lower Marker Selection: First Peak > 200 RFU    Upper Marker Selection: Last Peak > 200 RFU  
Ladder Size (bp): 1, 75, 200, 300, 400, 500, 700, 1000, 1500, 2000, 3000, 4000, 5000, 7000, 10000, 20000  
Quantification Using: Ladder    Final Concentration (ng/uL): 1.0417    Dilution Factor: 12.0  
Size Threshold (b.p.): 10000

**Data File:** 2019 06 18 13H 16M.raw  
**Sample:** 103613-001-015 (20x dil.)  
**Well Location:** G2

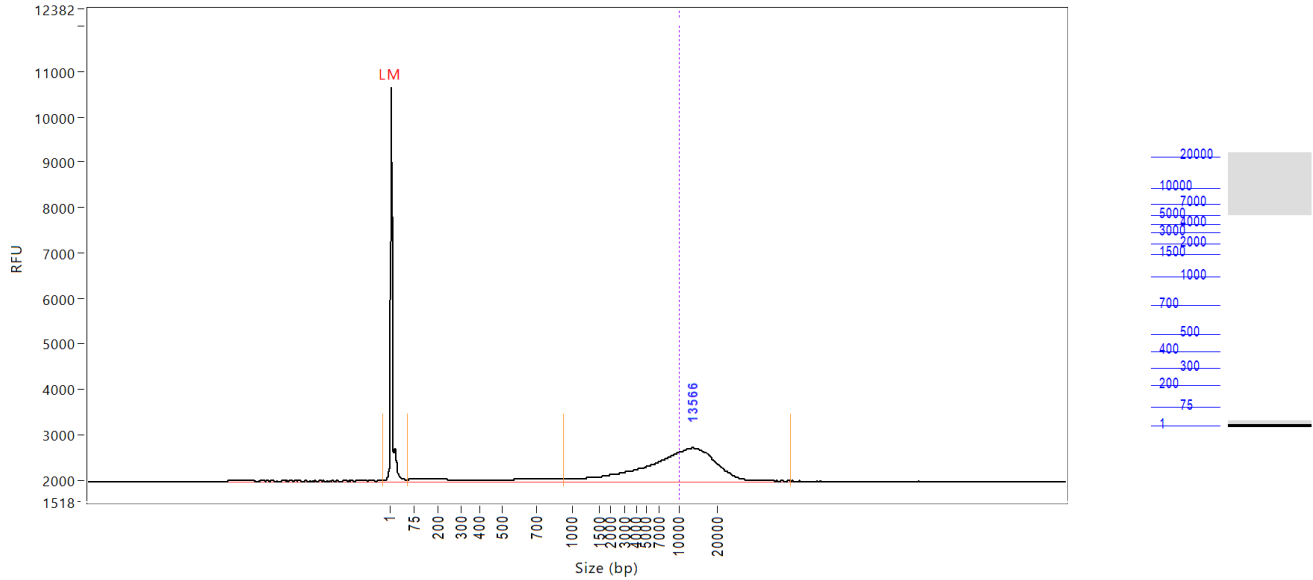

| Peak         | Size (bp) | Conc. (ng/uL) | From (bp) | To (bp) | Avg. Size (bp) | CV%    | RFU  | Corr. Peak Area |
|--------------|-----------|---------------|-----------|---------|----------------|--------|------|-----------------|
| 1            | 1 (LM)    | 0.0328        | 0         | 51      | 2              | 371.73 | 8680 | 62.575          |
| 2            | 13566     | 0.7907        | 927       | 39155   | 10868          | 61.21  | 740  | 125.697         |
| TIC:         |           | 0.7907        | ng/uL     |         |                |        |      |                 |
| TIM:         |           | 0.1198        | nmole/L   |         |                |        |      |                 |
| Total Conc.: |           | 0.9416        | ng/uL     |         |                |        |      |                 |
| GQN:         |           | 4.4           |           |         |                |        |      |                 |

Sample Peak Width (sec): 50    Sample Min Peak Height: 50    Sample Baseline V to V?: Y    Sample Baseline V to V pts: 3  
Sample Filter: Binomial    # of Pts for Filter: 3    Sample Start Region (min): 0    Sample End Region (min): 50  
Manual Baseline Start (min): 6    Manual Baseline End (min): 48  
Marker Peak Width (sec): 5    Marker Min Peak Height: 200    Marker Baseline V to V?: Y    Marker Baseline V to V pts: 3  
Lower Marker Selection: First Peak > 200 RFU    Upper Marker Selection: Last Peak > 200 RFU  
Ladder Size (bp): 1, 75, 200, 300, 400, 500, 700, 1000, 1500, 2000, 3000, 4000, 5000, 7000, 10000, 20000  
Quantification Using: Ladder    Final Concentration (ng/uL): 1.0417    Dilution Factor: 12.0  
Size Threshold (b.p.): 10000

Data File: 2019 06 18 13H 16M.raw

Sample: 103613-001-016 (20x dil.)

Well Location: H2

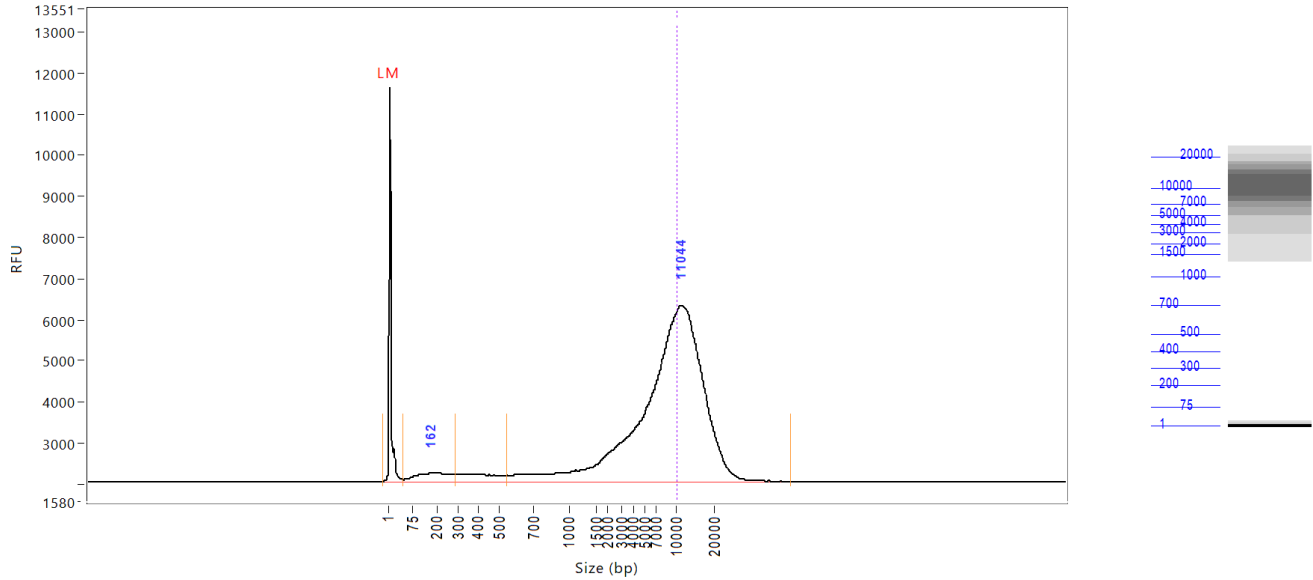

| Peak         | Size (bp) | Conc. (ng/uL) | From (bp) | To (bp) | Avg. Size (bp) | CV%    | RFU  | Corr. Peak Area |
|--------------|-----------|---------------|-----------|---------|----------------|--------|------|-----------------|
| 1            | 1 (LM)    | 0.0328        | 0         | 45      | 2              | 311.72 | 9570 | 66.534          |
| 2            | 162       | 0.1467        | 45        | 283     | 170            | 39.10  | 200  | 24.792          |
| 3            | 11044     | 3.4822        | 538       | 40191   | 9459           | 59.90  | 4274 | 588.573         |
| TIC:         |           | 3.6289        | ng/uL     |         |                |        |      |                 |
| TIM:         |           | 2.0244        | nmole/L   |         |                |        |      |                 |
| Total Conc.: |           | 3.7630        | ng/uL     |         |                |        |      |                 |
| GQN:         |           | 4.0           |           |         |                |        |      |                 |

Sample Peak Width (sec): 50    Sample Min Peak Height: 50    Sample Baseline V to V?: Y    Sample Baseline V to V pts: 3  
 Sample Filter: Binomial    # of Pts for Filter: 3    Sample Start Region (min): 0    Sample End Region (min): 50  
 Manual Baseline Start (min): 6    Manual Baseline End (min): 48  
 Marker Peak Width (sec): 5    Marker Min Peak Height: 200    Marker Baseline V to V?: Y    Marker Baseline V to V pts: 3  
 Lower Marker Selection: First Peak > 200 RFU    Upper Marker Selection: Last Peak > 200 RFU  
 Ladder Size (bp): 1, 75, 200, 300, 400, 500, 700, 1000, 1500, 2000, 3000, 4000, 5000, 7000, 10000, 20000  
 Quantification Using: Ladder    Final Concentration (ng/uL): 1.0417    Dilution Factor: 12.0  
 Size Threshold (b.p.): 10000



Data File: 2019 06 18 13H 16M.raw

Sample: 103613-001-017 (20x dil.)

Well Location: A3

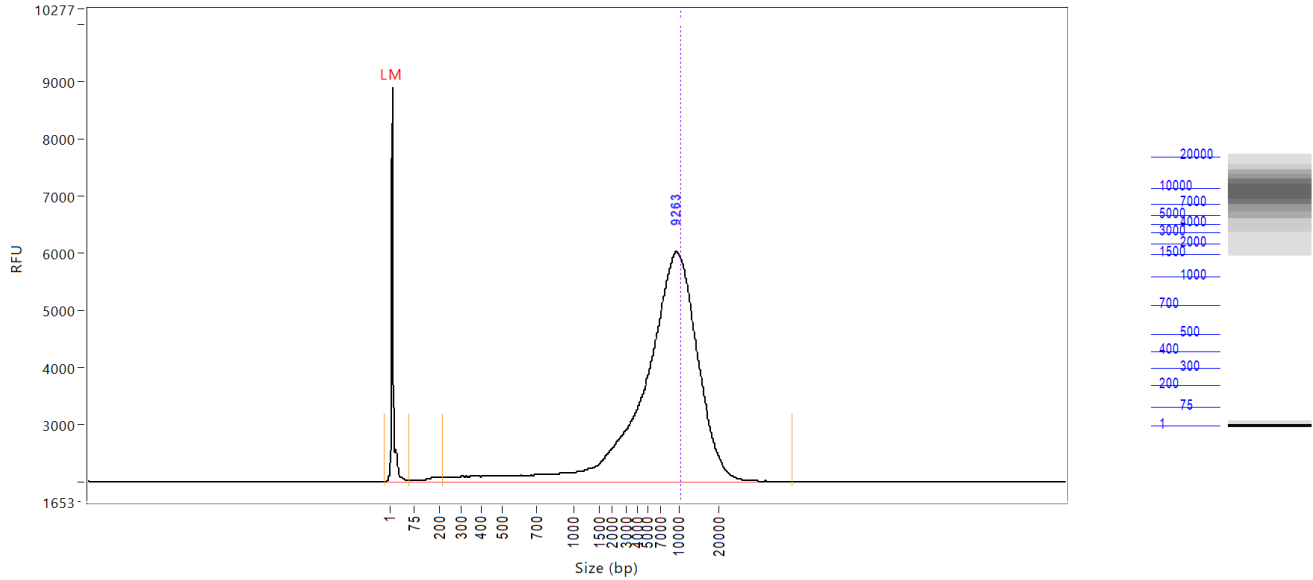

| Peak         | Size (bp) | Conc. (ng/uL) | From (bp) | To (bp) | Avg. Size (bp) | CV%    | RFU  | Corr. Peak Area |
|--------------|-----------|---------------|-----------|---------|----------------|--------|------|-----------------|
| 1            | 1 (LM)    | 0.0328        | 0         | 54      | 3              | 263.93 | 6891 | 48.261          |
| 2            | 9263      | 3.9261        | 209       | 39155   | 8146           | 60.07  | 4018 | 481.349         |
| TIC:         |           | 3.9261        | ng/uL     |         |                |        |      |                 |
| TIM:         |           | 0.7935        | nmole/L   |         |                |        |      |                 |
| Total Conc.: |           | 3.9684        | ng/uL     |         |                |        |      |                 |
| GQN:         |           | 3.2           |           |         |                |        |      |                 |

Sample Peak Width (sec): 50    Sample Min Peak Height: 50    Sample Baseline V to V?: Y    Sample Baseline V to V pts: 3  
 Sample Filter: Binomial    # of Pts for Filter: 3    Sample Start Region (min): 0    Sample End Region (min): 50  
 Manual Baseline Start (min): 6    Manual Baseline End (min): 48  
 Marker Peak Width (sec): 5    Marker Min Peak Height: 200    Marker Baseline V to V?: Y    Marker Baseline V to V pts: 3  
 Lower Marker Selection: First Peak > 200 RFU    Upper Marker Selection: Last Peak > 200 RFU  
 Ladder Size (bp): 1, 75, 200, 300, 400, 500, 700, 1000, 1500, 2000, 3000, 4000, 5000, 7000, 10000, 20000  
 Quantification Using: Ladder    Final Concentration (ng/uL): 1.0417    Dilution Factor: 12.0  
 Size Threshold (b.p.): 10000

**Data File:** 2019 06 18 13H 16M.raw  
**Sample:** 103613-001-018 (20x dil.)  
**Well Location:** B3

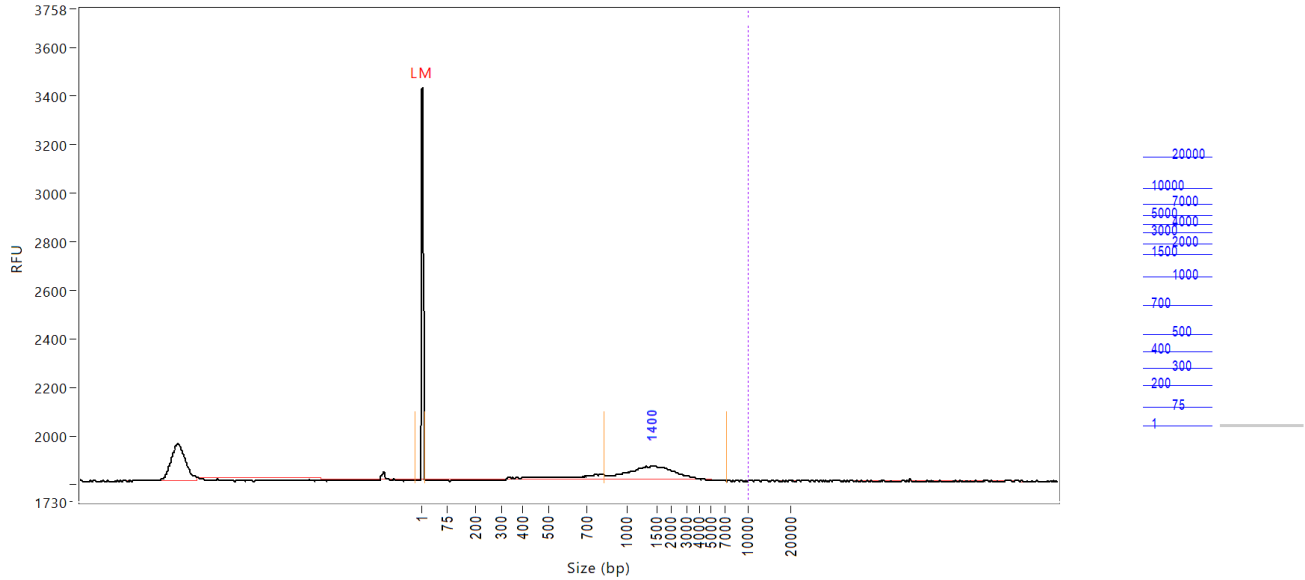

| Peak         | Size (bp) | Conc. (ng/uL) | From (bp) | To (bp) | Avg. Size (bp) | CV%     | RFU  | Corr. Peak Area |
|--------------|-----------|---------------|-----------|---------|----------------|---------|------|-----------------|
| 1            | 1 (LM)    | 0.0328        | 0         | 8       | 0              | -311.40 | 1608 | 11.910          |
| 2            | 1400      | 0.1617        | 832       | 7159    | 1510           | 37.46   | 56   | 4.892           |
| TIC:         |           | 0.1617        | ng/uL     |         |                |         |      |                 |
| TIM:         |           | 0.1762        | nmole/L   |         |                |         |      |                 |
| Total Conc.: |           | 0.2158        | ng/uL     |         |                |         |      |                 |
| GQN:         |           | 0.1           |           |         |                |         |      |                 |

Sample Peak Width (sec): 50    Sample Min Peak Height: 50    Sample Baseline V to V?: Y    Sample Baseline V to V pts: 3  
Sample Filter: Binomial    # of Pts for Filter: 3    Sample Start Region (min): 0    Sample End Region (min): 50  
Manual Baseline Start (min): 6    Manual Baseline End (min): 48  
Marker Peak Width (sec): 5    Marker Min Peak Height: 200    Marker Baseline V to V?: Y    Marker Baseline V to V pts: 3  
Lower Marker Selection: First Peak > 200 RFU    Upper Marker Selection: Last Peak > 200 RFU  
Ladder Size (bp): 1, 75, 200, 300, 400, 500, 700, 1000, 1500, 2000, 3000, 4000, 5000, 7000, 10000, 20000  
Quantification Using: Ladder    Final Concentration (ng/uL): 1.0417    Dilution Factor: 12.0  
Size Threshold (b.p.): 10000

**Data File:** 2019 06 18 13H 16M.raw  
**Sample:** 103613-001-019 (20x dil.)  
**Well Location:** C3

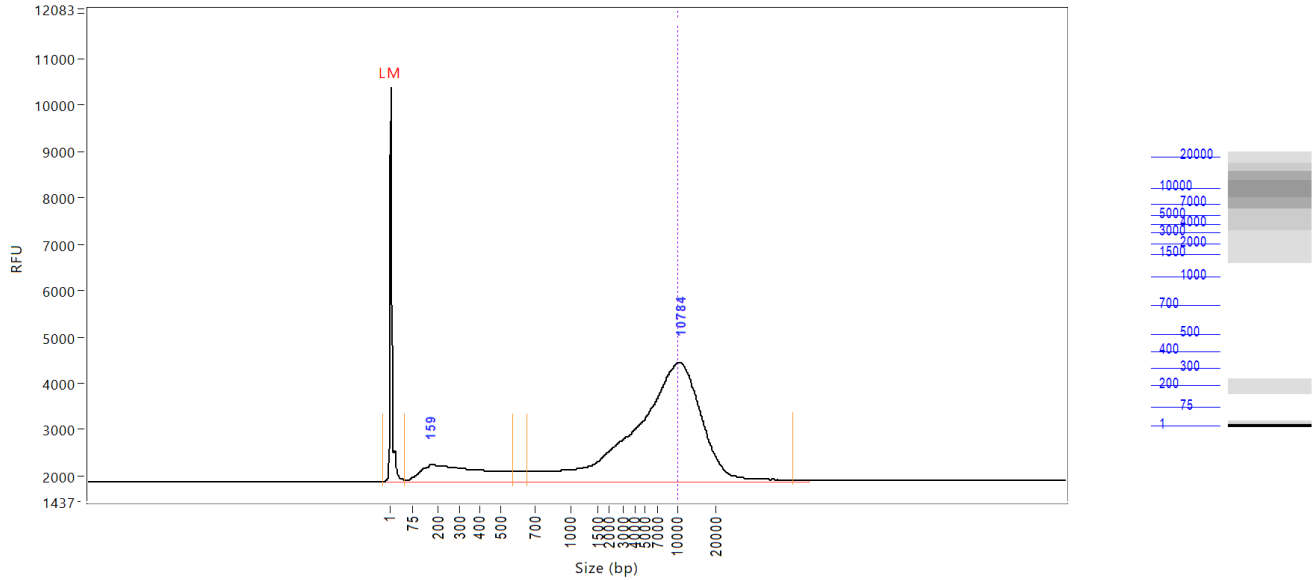

| Peak | Size (bp)    | Conc. (ng/uL) | From (bp) | To (bp) | Avg. Size (bp) | CV%    | RFU  | Corr. Peak Area |
|------|--------------|---------------|-----------|---------|----------------|--------|------|-----------------|
| 1    | 1 (LM)       | 0.0328        | 0         | 47      | 3              | 266.54 | 8507 | 59.207          |
| 2    | 159          | 0.4674        | 47        | 569     | 288            | 46.60  | 362  | 70.307          |
| 3    | 10784        | 2.5740        | 649       | 40277   | 8371           | 69.18  | 2556 | 387.155         |
|      | TIC:         | 3.0414        | ng/uL     |         |                |        |      |                 |
|      | TIM:         | 3.1759        | nmole/L   |         |                |        |      |                 |
|      | Total Conc.: | 3.1174        | ng/uL     |         |                |        |      |                 |
|      | GQN:         | 2.9           |           |         |                |        |      |                 |

Sample Peak Width (sec): 50    Sample Min Peak Height: 50    Sample Baseline V to V?: Y    Sample Baseline V to V pts: 3  
Sample Filter: Binomial    # of Pts for Filter: 3    Sample Start Region (min): 0    Sample End Region (min): 50  
Manual Baseline Start (min): 6    Manual Baseline End (min): 48  
Marker Peak Width (sec): 5    Marker Min Peak Height: 200    Marker Baseline V to V?: Y    Marker Baseline V to V pts: 3  
Lower Marker Selection: First Peak > 200 RFU    Upper Marker Selection: Last Peak > 200 RFU  
Ladder Size (bp): 1, 75, 200, 300, 400, 500, 700, 1000, 1500, 2000, 3000, 4000, 5000, 7000, 10000, 20000  
Quantification Using: Ladder    Final Concentration (ng/uL): 1.0417    Dilution Factor: 12.0  
Size Threshold (b.p.): 10000

Data File: 2019 06 18 13H 16M.raw

Sample: 103613-001-020 (20x dil.)

Well Location: D3

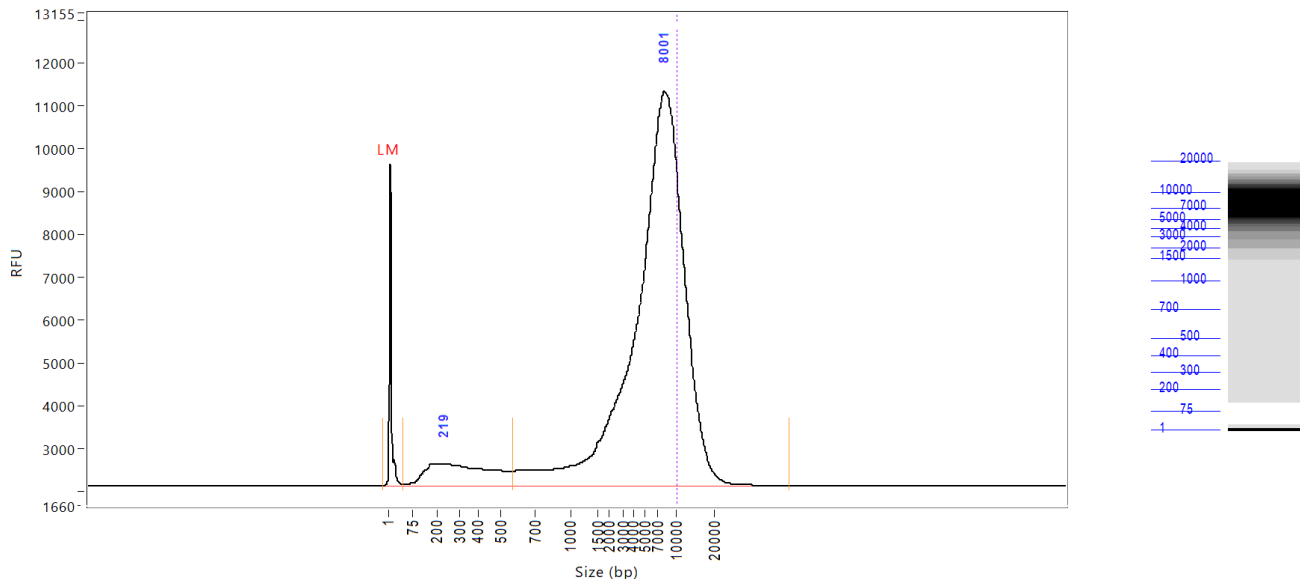

| Peak         | Size (bp) | Conc. (ng/uL) | From (bp) | To (bp) | Avg. Size (bp) | CV%    | RFU  | Corr. Peak Area |
|--------------|-----------|---------------|-----------|---------|----------------|--------|------|-----------------|
| 1            | 1 (LM)    | 0.0328        | 0         | 45      | 2              | 350.10 | 7499 | 52.311          |
| 2            | 219       | 0.7984        | 45        | 567     | 304            | 42.81  | 508  | 106.095         |
| 3            | 8001      | 7.1584        | 567       | 39414   | 6998           | 57.27  | 9188 | 951.291         |
| TIC:         |           | 7.9568        | ng/uL     |         |                |        |      |                 |
| TIM:         |           | 6.0040        | nmole/L   |         |                |        |      |                 |
| Total Conc.: |           | 7.9648        | ng/uL     |         |                |        |      |                 |
| GQN:         |           | 1.8           |           |         |                |        |      |                 |

Sample Peak Width (sec): 50    Sample Min Peak Height: 50    Sample Baseline V to V?: Y    Sample Baseline V to V pts: 3  
 Sample Filter: Binomial    # of Pts for Filter: 3    Sample Start Region (min): 0    Sample End Region (min): 50  
 Manual Baseline Start (min): 6    Manual Baseline End (min): 48  
 Marker Peak Width (sec): 5    Marker Min Peak Height: 200    Marker Baseline V to V?: Y    Marker Baseline V to V pts: 3  
 Lower Marker Selection: First Peak > 200 RFU    Upper Marker Selection: Last Peak > 200 RFU  
 Ladder Size (bp): 1, 75, 200, 300, 400, 500, 700, 1000, 1500, 2000, 3000, 4000, 5000, 7000, 10000, 20000  
 Quantification Using: Ladder    Final Concentration (ng/uL): 1.0417    Dilution Factor: 12.0  
 Size Threshold (b.p.): 10000

Data File: 2019 06 18 13H 16M.raw

Sample: 103613-001-021 (20x dil.)

Well Location: E3

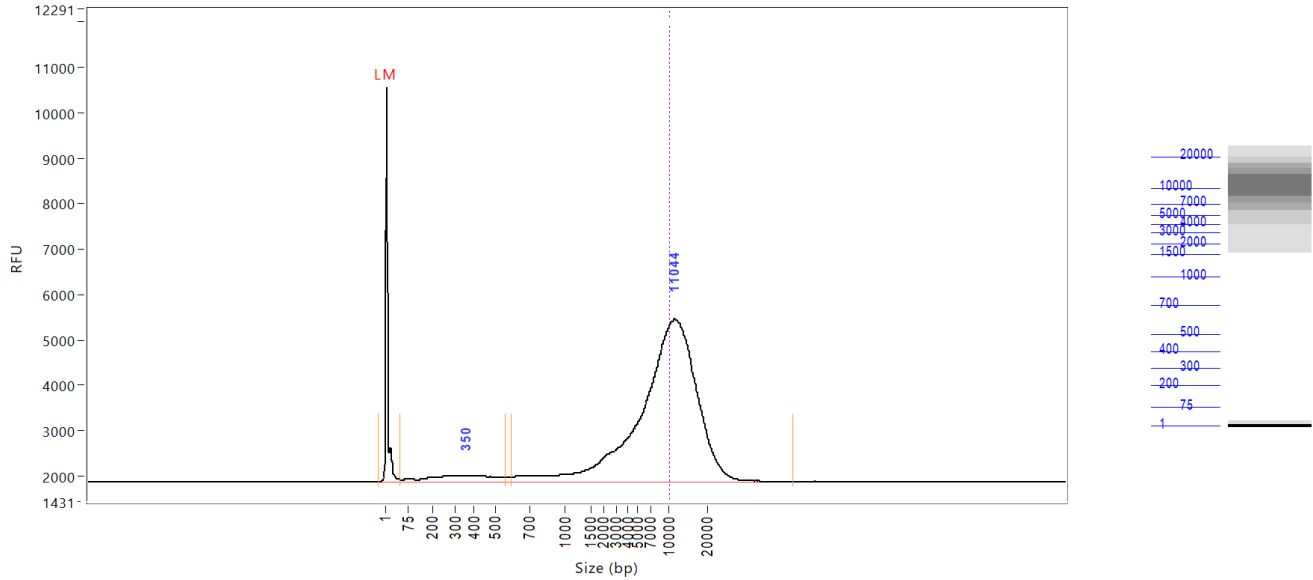

| Peak         | Size (bp) | Conc. (ng/uL) | From (bp) | To (bp) | Avg. Size (bp) | CV%    | RFU  | Corr. Peak Area |
|--------------|-----------|---------------|-----------|---------|----------------|--------|------|-----------------|
| 1            | 1 (LM)    | 0.0328        | 0         | 45      | 2              | 299.44 | 8682 | 60.687          |
| 2            | 350       | 0.1773        | 45        | 554     | 309            | 44.05  | 120  | 27.327          |
| 3            | 11044     | 3.1086        | 587       | 42866   | 9810           | 57.32  | 3575 | 479.257         |
| TIC:         |           | 3.2859        | ng/uL     |         |                |        |      |                 |
| TIM:         |           | 1.4653        | nmole/L   |         |                |        |      |                 |
| Total Conc.: |           | 3.3141        | ng/uL     |         |                |        |      |                 |
| GQN:         |           | 4.3           |           |         |                |        |      |                 |

Sample Peak Width (sec): 50    Sample Min Peak Height: 50    Sample Baseline V to V?: Y    Sample Baseline V to V pts: 3  
 Sample Filter: Binomial    # of Pts for Filter: 3    Sample Start Region (min): 0    Sample End Region (min): 50  
 Manual Baseline Start (min): 6    Manual Baseline End (min): 48  
 Marker Peak Width (sec): 5    Marker Min Peak Height: 200    Marker Baseline V to V?: Y    Marker Baseline V to V pts: 3  
 Lower Marker Selection: First Peak > 200 RFU    Upper Marker Selection: Last Peak > 200 RFU  
 Ladder Size (bp): 1, 75, 200, 300, 400, 500, 700, 1000, 1500, 2000, 3000, 4000, 5000, 7000, 10000, 20000  
 Quantification Using: Ladder    Final Concentration (ng/uL): 1.0417    Dilution Factor: 12.0  
 Size Threshold (b.p.): 10000

**Data File:** 2019 06 18 13H 16M.raw  
**Sample:** 103613-001-022 (20x dil.)  
**Well Location:** F3

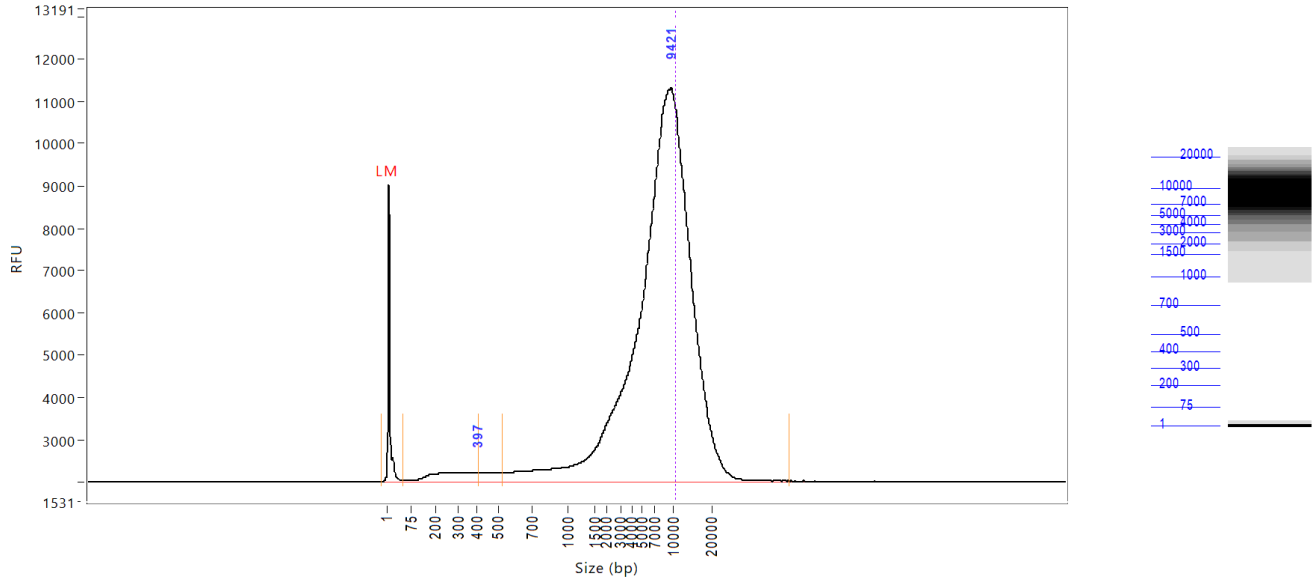

| Peak         | Size (bp) | Conc. (ng/uL) | From (bp) | To (bp) | Avg. Size (bp) | CV%    | RFU  | Corr. Peak Area |
|--------------|-----------|---------------|-----------|---------|----------------|--------|------|-----------------|
| 1            | 1 (LM)    | 0.0328        | 0         | 47      | 2              | 375.08 | 7043 | 50.374          |
| 2            | 397       | 0.2508        | 47        | 403     | 257            | 33.80  | 214  | 32.097          |
| 3            | 9421      | 8.3829        | 521       | 40104   | 8365           | 57.31  | 9321 | 1072.771        |
| TIC:         |           | 8.6337        | ng/uL     |         |                |        |      |                 |
| TIM:         |           | 3.2549        | nmole/L   |         |                |        |      |                 |
| Total Conc.: |           | 8.7568        | ng/uL     |         |                |        |      |                 |
| GQN:         |           | 3.1           |           |         |                |        |      |                 |

Sample Peak Width (sec): 50    Sample Min Peak Height: 50    Sample Baseline V to V?: Y    Sample Baseline V to V pts: 3  
Sample Filter: Binomial    # of Pts for Filter: 3    Sample Start Region (min): 0    Sample End Region (min): 50  
Manual Baseline Start (min): 6    Manual Baseline End (min): 48  
Marker Peak Width (sec): 5    Marker Min Peak Height: 200    Marker Baseline V to V?: Y    Marker Baseline V to V pts: 3  
Lower Marker Selection: First Peak > 200 RFU    Upper Marker Selection: Last Peak > 200 RFU  
Ladder Size (bp): 1, 75, 200, 300, 400, 500, 700, 1000, 1500, 2000, 3000, 4000, 5000, 7000, 10000, 20000  
Quantification Using: Ladder    Final Concentration (ng/uL): 1.0417    Dilution Factor: 12.0  
Size Threshold (b.p.): 10000

**Data File:** 2019 06 18 13H 16M.raw  
**Sample:** 103613-001-023 (20x dil.)  
**Well Location:** G3

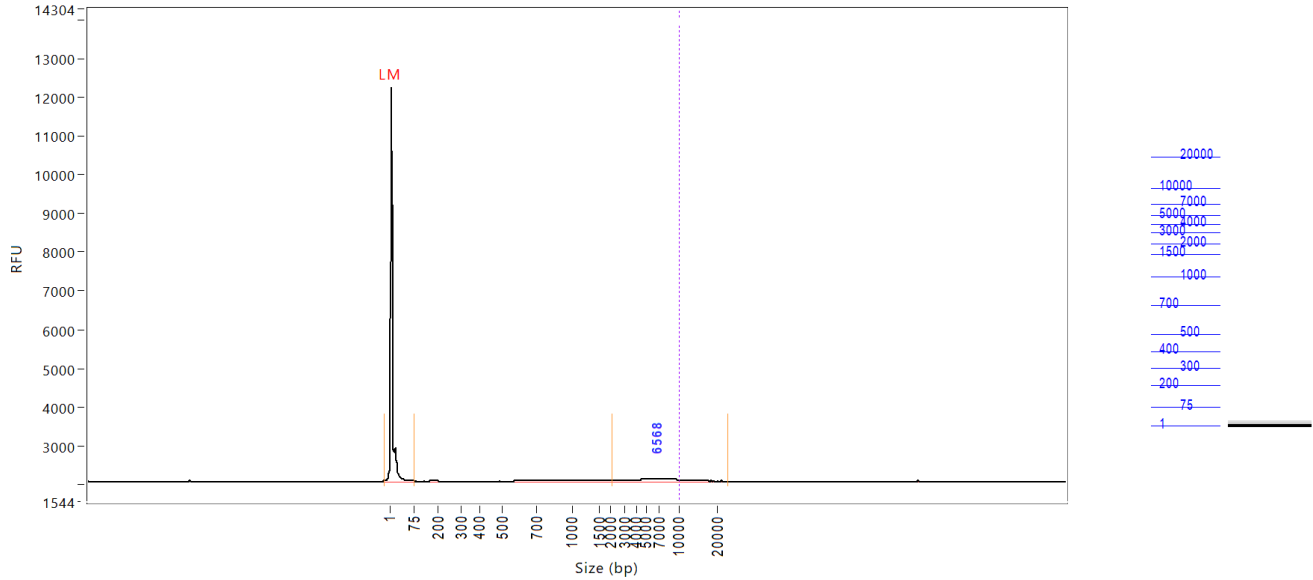

| Peak         | Size (bp) | Conc. (ng/uL) | From (bp) | To (bp) | Avg. Size (bp) | CV%    | RFU   | Corr. Peak Area |
|--------------|-----------|---------------|-----------|---------|----------------|--------|-------|-----------------|
| 1            | 1 (LM)    | 0.0328        | 0         | 74      | 2              | 348.44 | 10190 | 71.690          |
| 2            | 6568      | 0.0446        | 2120      | 23020   | 7949           | 56.73  | 70    | 8.125           |
| TIC:         |           | 0.0446        | ng/uL     |         |                |        |       |                 |
| TIM:         |           | 0.0092        | nmole/L   |         |                |        |       |                 |
| Total Conc.: |           | 0.1179        | ng/uL     |         |                |        |       |                 |
| GQN:         |           | 2.8           |           |         |                |        |       |                 |

Sample Peak Width (sec): 50    Sample Min Peak Height: 50    Sample Baseline V to V?: Y    Sample Baseline V to V pts: 3  
Sample Filter: Binomial    # of Pts for Filter: 3    Sample Start Region (min): 0    Sample End Region (min): 50  
Manual Baseline Start (min): 6    Manual Baseline End (min): 48  
Marker Peak Width (sec): 5    Marker Min Peak Height: 200    Marker Baseline V to V?: Y    Marker Baseline V to V pts: 3  
Lower Marker Selection: First Peak > 200 RFU    Upper Marker Selection: Last Peak > 200 RFU  
Ladder Size (bp): 1, 75, 200, 300, 400, 500, 700, 1000, 1500, 2000, 3000, 4000, 5000, 7000, 10000, 20000  
Quantification Using: Ladder    Final Concentration (ng/uL): 1.0417    Dilution Factor: 12.0  
Size Threshold (b.p.): 10000

Data File: 2019 06 18 13H 16M.raw

Sample: 103613-001-024 (20x dil.)

Well Location: H3

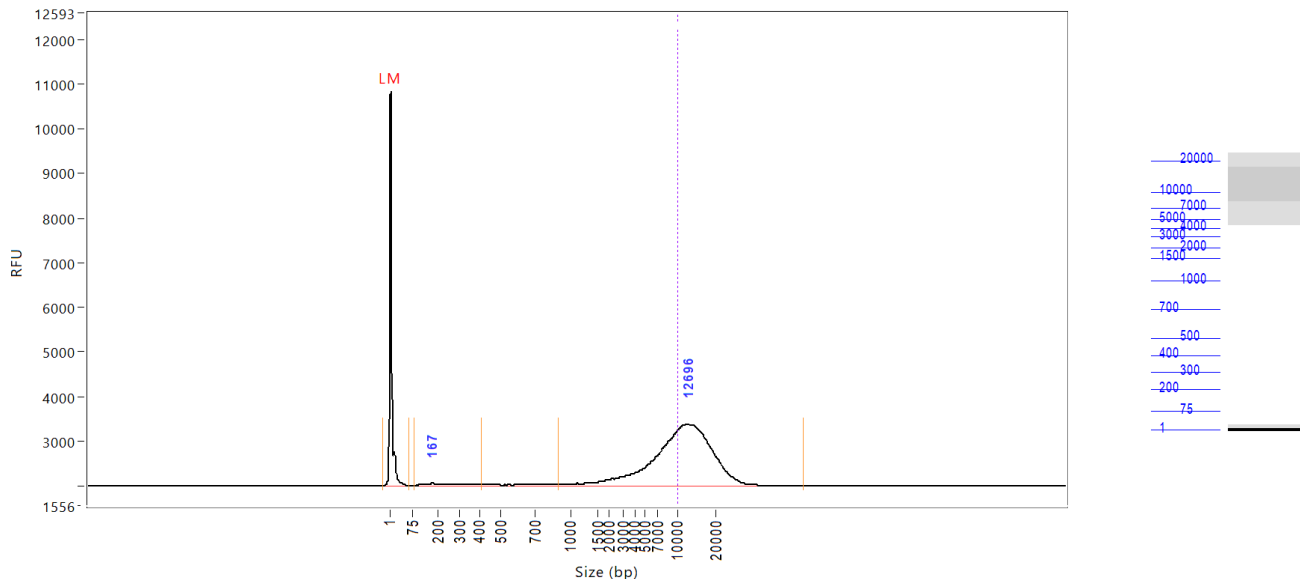

| Peak         | Size (bp) | Conc. (ng/uL) | From (bp) | To (bp) | Avg. Size (bp) | CV%    | RFU  | Corr. Peak Area |
|--------------|-----------|---------------|-----------|---------|----------------|--------|------|-----------------|
| 1            | 1 (LM)    | 0.0328        | 0         | 61      | 2              | 380.82 | 8820 | 62.806          |
| 2            | 167       | 0.0281        | 78        | 410     | 229            | 37.60  | 58   | 4.479           |
| 3            | 12696     | 1.2364        | 897       | 42866   | 11588          | 50.84  | 1376 | 197.275         |
| TIC:         |           | 1.2645        | ng/uL     |         |                |        |      |                 |
| TIM:         |           | 0.3773        | nmole/L   |         |                |        |      |                 |
| Total Conc.: |           | 1.2927        | ng/uL     |         |                |        |      |                 |
| GQN:         |           | 5.4           |           |         |                |        |      |                 |

Sample Peak Width (sec): 50    Sample Min Peak Height: 50    Sample Baseline V to V?: Y    Sample Baseline V to V pts: 3  
 Sample Filter: Binomial    # of Pts for Filter: 3    Sample Start Region (min): 0    Sample End Region (min): 50  
 Manual Baseline Start (min): 6    Manual Baseline End (min): 48  
 Marker Peak Width (sec): 5    Marker Min Peak Height: 200    Marker Baseline V to V?: Y    Marker Baseline V to V pts: 3  
 Lower Marker Selection: First Peak > 200 RFU    Upper Marker Selection: Last Peak > 200 RFU  
 Ladder Size (bp): 1, 75, 200, 300, 400, 500, 700, 1000, 1500, 2000, 3000, 4000, 5000, 7000, 10000, 20000  
 Quantification Using: Ladder    Final Concentration (ng/uL): 1.0417    Dilution Factor: 12.0  
 Size Threshold (b.p.): 10000



Data File: 2019 06 18 13H 16M.raw

Sample: 103613-001-025 (20x dil.)

Well Location: A4

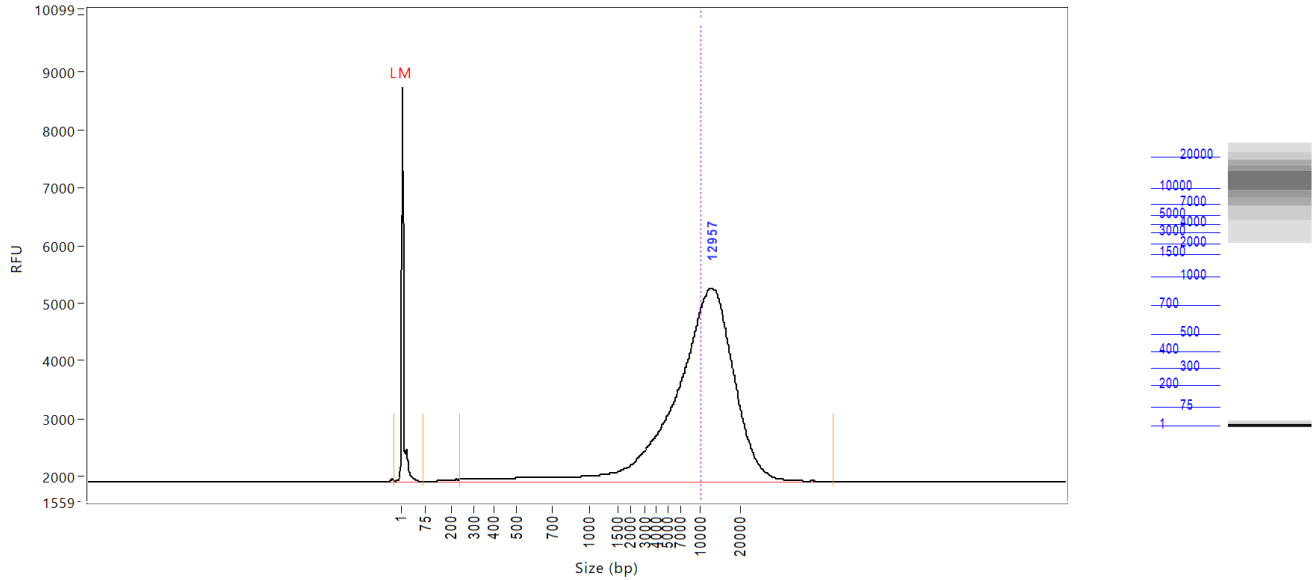

| Peak         | Size (bp) | Conc. (ng/uL) | From (bp) | To (bp) | Avg. Size (bp) | CV%    | RFU  | Corr. Peak Area |
|--------------|-----------|---------------|-----------|---------|----------------|--------|------|-----------------|
| 1            | 1 (LM)    | 0.0328        | 0         | 66      | 3              | 268.67 | 6825 | 48.574          |
| 2            | 12957     | 3.7897        | 233       | 43728   | 10741          | 55.98  | 3348 | 467.641         |
| TIC:         |           | 3.7897        | ng/uL     |         |                |        |      |                 |
| TIM:         |           | 0.5809        | nmole/L   |         |                |        |      |                 |
| Total Conc.: |           | 3.8122        | ng/uL     |         |                |        |      |                 |
| GQN:         |           | 5.3           |           |         |                |        |      |                 |

Sample Peak Width (sec): 50    Sample Min Peak Height: 50    Sample Baseline V to V?: Y    Sample Baseline V to V pts: 3  
 Sample Filter: Binomial    # of Pts for Filter: 3    Sample Start Region (min): 0    Sample End Region (min): 50  
 Manual Baseline Start (min): 6    Manual Baseline End (min): 48  
 Marker Peak Width (sec): 5    Marker Min Peak Height: 200    Marker Baseline V to V?: Y    Marker Baseline V to V pts: 3  
 Lower Marker Selection: First Peak > 200 RFU    Upper Marker Selection: Last Peak > 200 RFU  
 Ladder Size (bp): 1, 75, 200, 300, 400, 500, 700, 1000, 1500, 2000, 3000, 4000, 5000, 7000, 10000, 20000  
 Quantification Using: Ladder    Final Concentration (ng/uL): 1.0417    Dilution Factor: 12.0  
 Size Threshold (b.p.): 10000

Data File: 2019 06 18 13H 16M.raw

Sample: 103613-001-026 (20x dil.)

Well Location: B4

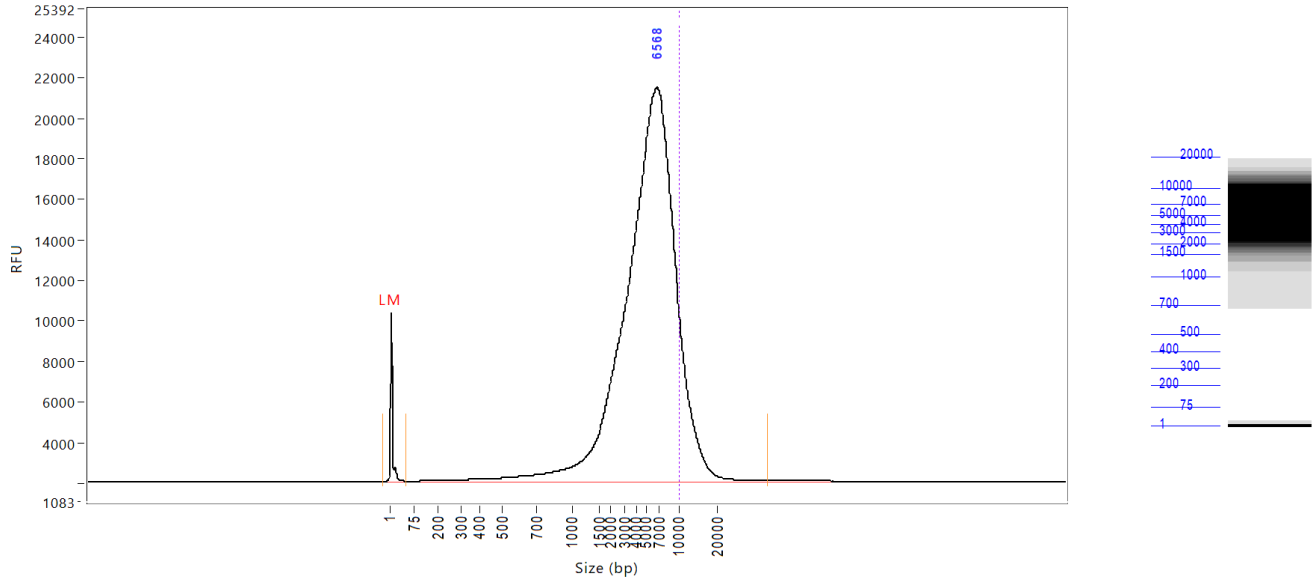

| Peak         | Size (bp) | Conc. (ng/uL) | From (bp) | To (bp) | Avg. Size (bp) | CV%    | RFU   | Corr. Peak Area |
|--------------|-----------|---------------|-----------|---------|----------------|--------|-------|-----------------|
| 1            | 1 (LM)    | 0.0328        | 0         | 50      | 2              | 357.22 | 8350  | 58.035          |
| 2            | 6568      | 13.7462       | 50        | 33202   | 5774           | 60.03  | 19437 | 2026.654        |
| TIC:         |           | 13.7462       | ng/uL     |         |                |        |       |                 |
| TIM:         |           | 3.9193        | nmole/L   |         |                |        |       |                 |
| Total Conc.: |           | 13.8695       | ng/uL     |         |                |        |       |                 |
| GQN:         |           | 1.0           |           |         |                |        |       |                 |

Sample Peak Width (sec): 50    Sample Min Peak Height: 50    Sample Baseline V to V?: Y    Sample Baseline V to V pts: 3  
 Sample Filter: Binomial    # of Pts for Filter: 3    Sample Start Region (min): 0    Sample End Region (min): 50  
 Manual Baseline Start (min): 6    Manual Baseline End (min): 48  
 Marker Peak Width (sec): 5    Marker Min Peak Height: 200    Marker Baseline V to V?: Y    Marker Baseline V to V pts: 3  
 Lower Marker Selection: First Peak > 200 RFU    Upper Marker Selection: Last Peak > 200 RFU  
 Ladder Size (bp): 1, 75, 200, 300, 400, 500, 700, 1000, 1500, 2000, 3000, 4000, 5000, 7000, 10000, 20000  
 Quantification Using: Ladder    Final Concentration (ng/uL): 1.0417    Dilution Factor: 12.0  
 Size Threshold (b.p.): 10000

Data File: 2019 06 18 13H 16M.raw

Sample: 103613-001-027 (20x dil.)

Well Location: C4

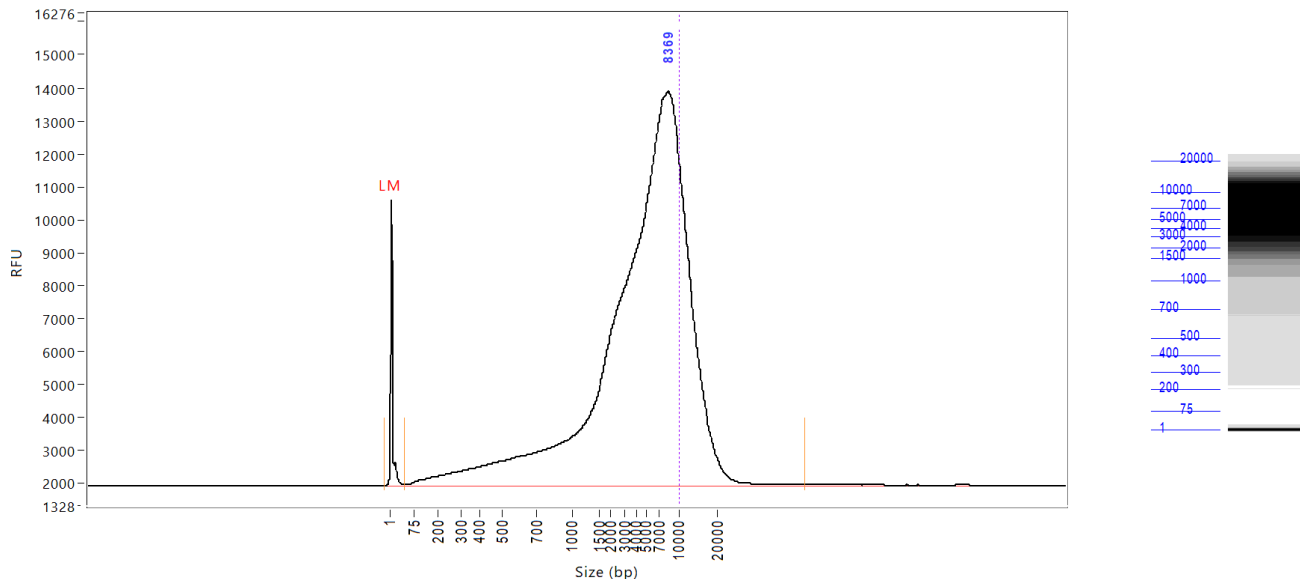

| Peak         | Size (bp) | Conc. (ng/uL) | From (bp) | To (bp) | Avg. Size (bp) | CV%    | RFU   | Corr. Peak Area |
|--------------|-----------|---------------|-----------|---------|----------------|--------|-------|-----------------|
| 1            | 1 (LM)    | 0.0328        | 0         | 46      | 2              | 288.02 | 8672  | 59.823          |
| 2            | 8369      | 12.2727       | 46        | 42866   | 5887           | 79.50  | 11943 | 1865.130        |
| TIC:         |           | 12.2727       | ng/uL     |         |                |        |       |                 |
| TIM:         |           | 3.4320        | nmole/L   |         |                |        |       |                 |
| Total Conc.: |           | 12.3069       | ng/uL     |         |                |        |       |                 |
| GQN:         |           | 1.7           |           |         |                |        |       |                 |

Sample Peak Width (sec): 50    Sample Min Peak Height: 50    Sample Baseline V to V?: Y    Sample Baseline V to V pts: 3  
 Sample Filter: Binomial    # of Pts for Filter: 3    Sample Start Region (min): 0    Sample End Region (min): 50  
 Manual Baseline Start (min): 6    Manual Baseline End (min): 48  
 Marker Peak Width (sec): 5    Marker Min Peak Height: 200    Marker Baseline V to V?: Y    Marker Baseline V to V pts: 3  
 Lower Marker Selection: First Peak > 200 RFU    Upper Marker Selection: Last Peak > 200 RFU  
 Ladder Size (bp): 1, 75, 200, 300, 400, 500, 700, 1000, 1500, 2000, 3000, 4000, 5000, 7000, 10000, 20000  
 Quantification Using: Ladder    Final Concentration (ng/uL): 1.0417    Dilution Factor: 12.0  
 Size Threshold (b.p.): 10000

Data File: 2019 06 18 13H 16M.raw

Sample: 103613-001-028 (20x dil.)

Well Location: D4

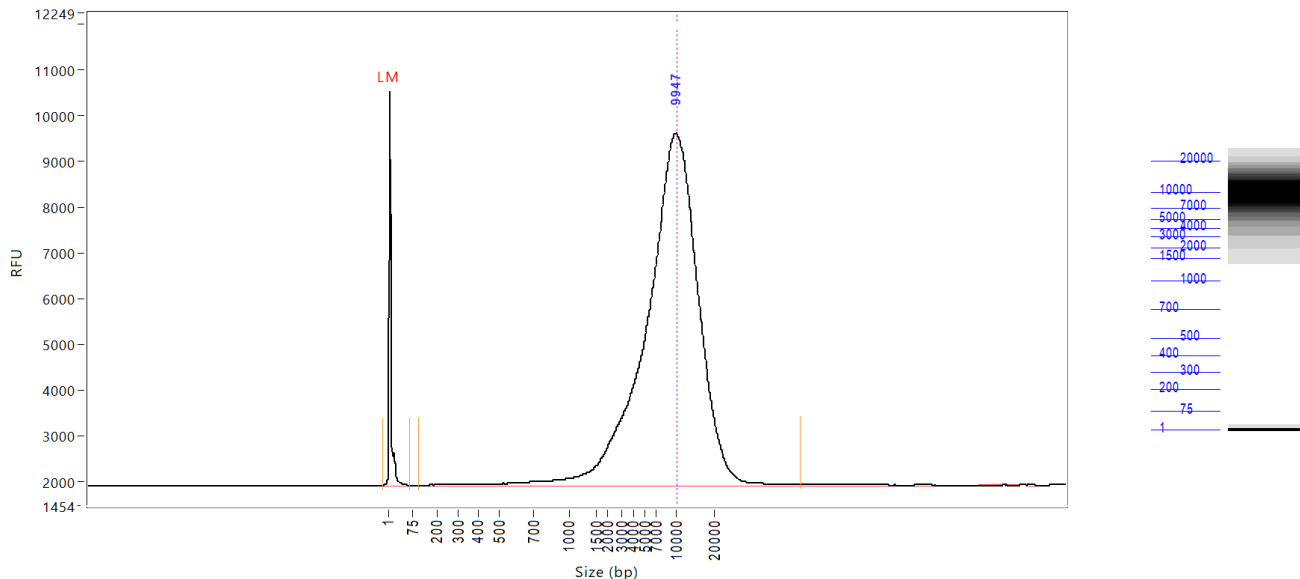

| Peak         | Size (bp) | Conc. (ng/uL) | From (bp) | To (bp) | Avg. Size (bp) | CV%    | RFU  | Corr. Peak Area |
|--------------|-----------|---------------|-----------|---------|----------------|--------|------|-----------------|
| 1            | 1 (LM)    | 0.0328        | 0         | 68      | 2              | 353.83 | 8626 | 60.059          |
| 2            | 9947      | 6.0662        | 106       | 42607   | 9448           | 54.47  | 7707 | 925.538         |
| TIC:         |           | 6.0662        | ng/uL     |         |                |        |      |                 |
| TIM:         |           | 1.0570        | nmole/L   |         |                |        |      |                 |
| Total Conc.: |           | 6.0911        | ng/uL     |         |                |        |      |                 |
| GQN:         |           | 4.1           |           |         |                |        |      |                 |

Sample Peak Width (sec): 50    Sample Min Peak Height: 50    Sample Baseline V to V?: Y    Sample Baseline V to V pts: 3  
 Sample Filter: Binomial    # of Pts for Filter: 3    Sample Start Region (min): 0    Sample End Region (min): 50  
 Manual Baseline Start (min): 6    Manual Baseline End (min): 48  
 Marker Peak Width (sec): 5    Marker Min Peak Height: 200    Marker Baseline V to V?: Y    Marker Baseline V to V pts: 3  
 Lower Marker Selection: First Peak > 200 RFU    Upper Marker Selection: Last Peak > 200 RFU  
 Ladder Size (bp): 1, 75, 200, 300, 400, 500, 700, 1000, 1500, 2000, 3000, 4000, 5000, 7000, 10000, 20000  
 Quantification Using: Ladder    Final Concentration (ng/uL): 1.0417    Dilution Factor: 12.0  
 Size Threshold (b.p.): 10000

Data File: 2019 06 18 13H 16M.raw

Sample: 103613-001-029 (20x dil.)

Well Location: E4

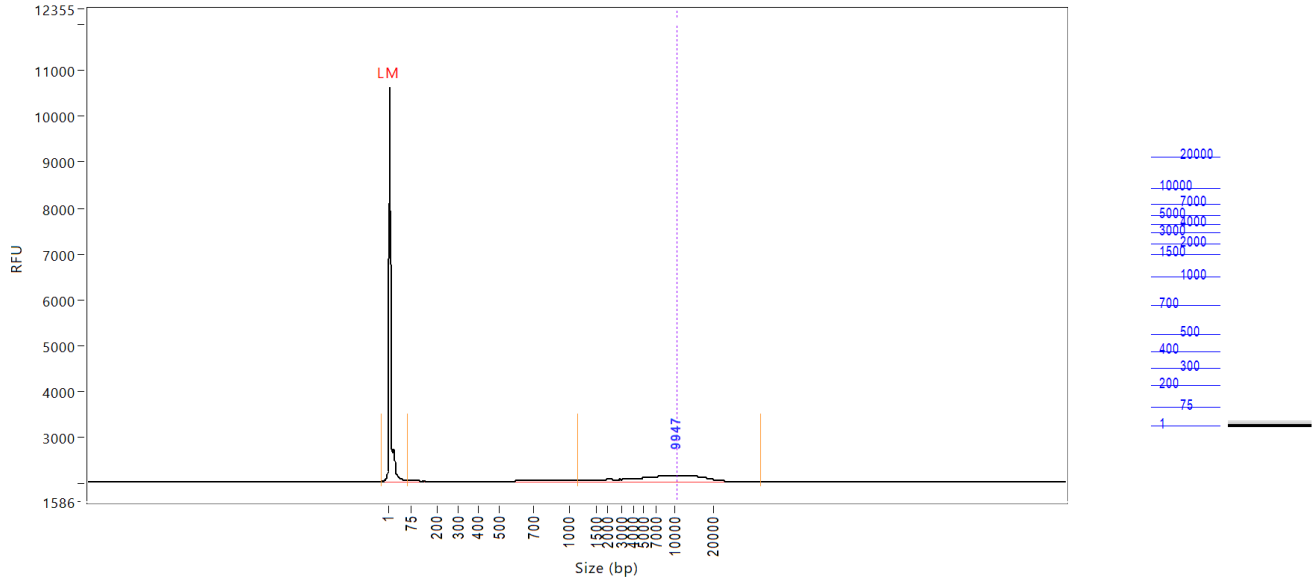

| Peak         | Size (bp) | Conc. (ng/uL) | From (bp) | To (bp) | Avg. Size (bp) | CV%    | RFU  | Corr. Peak Area |
|--------------|-----------|---------------|-----------|---------|----------------|--------|------|-----------------|
| 1            | 1 (LM)    | 0.0328        | 0         | 58      | 3              | 282.58 | 8603 | 59.757          |
| 2            | 9947      | 0.1426        | 1169      | 32511   | 8987           | 60.49  | 134  | 21.650          |
| TIC:         |           | 0.1426        | ng/uL     |         |                |        |      |                 |
| TIM:         |           | 0.0261        | nmole/L   |         |                |        |      |                 |
| Total Conc.: |           | 0.1760        | ng/uL     |         |                |        |      |                 |
| GQN:         |           | 3.1           |           |         |                |        |      |                 |

Sample Peak Width (sec): 50    Sample Min Peak Height: 50    Sample Baseline V to V?: Y    Sample Baseline V to V pts: 3  
 Sample Filter: Binomial    # of Pts for Filter: 3    Sample Start Region (min): 0    Sample End Region (min): 50  
 Manual Baseline Start (min): 6    Manual Baseline End (min): 48  
 Marker Peak Width (sec): 5    Marker Min Peak Height: 200    Marker Baseline V to V?: Y    Marker Baseline V to V pts: 3  
 Lower Marker Selection: First Peak > 200 RFU    Upper Marker Selection: Last Peak > 200 RFU  
 Ladder Size (bp): 1, 75, 200, 300, 400, 500, 700, 1000, 1500, 2000, 3000, 4000, 5000, 7000, 10000, 20000  
 Quantification Using: Ladder    Final Concentration (ng/uL): 1.0417    Dilution Factor: 12.0  
 Size Threshold (b.p.): 10000

**Data File:** 2019 06 18 13H 16M.raw  
**Sample:** 103613-001-030 (20x dil.)  
**Well Location:** F4

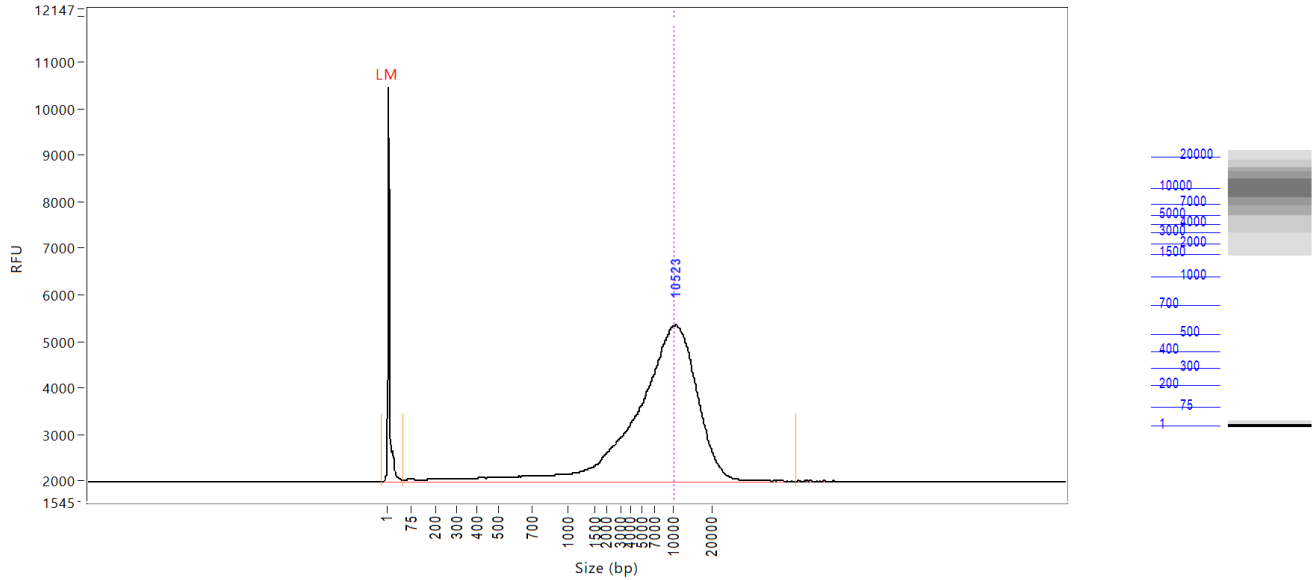

| Peak         | Size (bp) | Conc. (ng/uL) | From (bp) | To (bp) | Avg. Size (bp) | CV%    | RFU  | Corr. Peak Area |
|--------------|-----------|---------------|-----------|---------|----------------|--------|------|-----------------|
| 1            | 1 (LM)    | 0.0328        | 0         | 49      | 2              | 304.91 | 8473 | 58.820          |
| 2            | 10523     | 3.1891        | 49        | 42262   | 8549           | 64.35  | 3376 | 476.530         |
| TIC:         |           | 3.1891        | ng/uL     |         |                |        |      |                 |
| TIM:         |           | 0.6141        | nmole/L   |         |                |        |      |                 |
| Total Conc.: |           | 3.2003        | ng/uL     |         |                |        |      |                 |
| GQN:         |           | 3.7           |           |         |                |        |      |                 |

Sample Peak Width (sec): 50    Sample Min Peak Height: 50    Sample Baseline V to V?: Y    Sample Baseline V to V pts: 3  
Sample Filter: Binomial    # of Pts for Filter: 3    Sample Start Region (min): 0    Sample End Region (min): 50  
Manual Baseline Start (min): 6    Manual Baseline End (min): 48  
Marker Peak Width (sec): 5    Marker Min Peak Height: 200    Marker Baseline V to V?: Y    Marker Baseline V to V pts: 3  
Lower Marker Selection: First Peak > 200 RFU    Upper Marker Selection: Last Peak > 200 RFU  
Ladder Size (bp): 1, 75, 200, 300, 400, 500, 700, 1000, 1500, 2000, 3000, 4000, 5000, 7000, 10000, 20000  
Quantification Using: Ladder    Final Concentration (ng/uL): 1.0417    Dilution Factor: 12.0  
Size Threshold (b.p.): 10000

**Data File:** 2019 06 18 13H 16M.raw  
**Sample:** 103613-001-031 (20x dil.)  
**Well Location:** G4

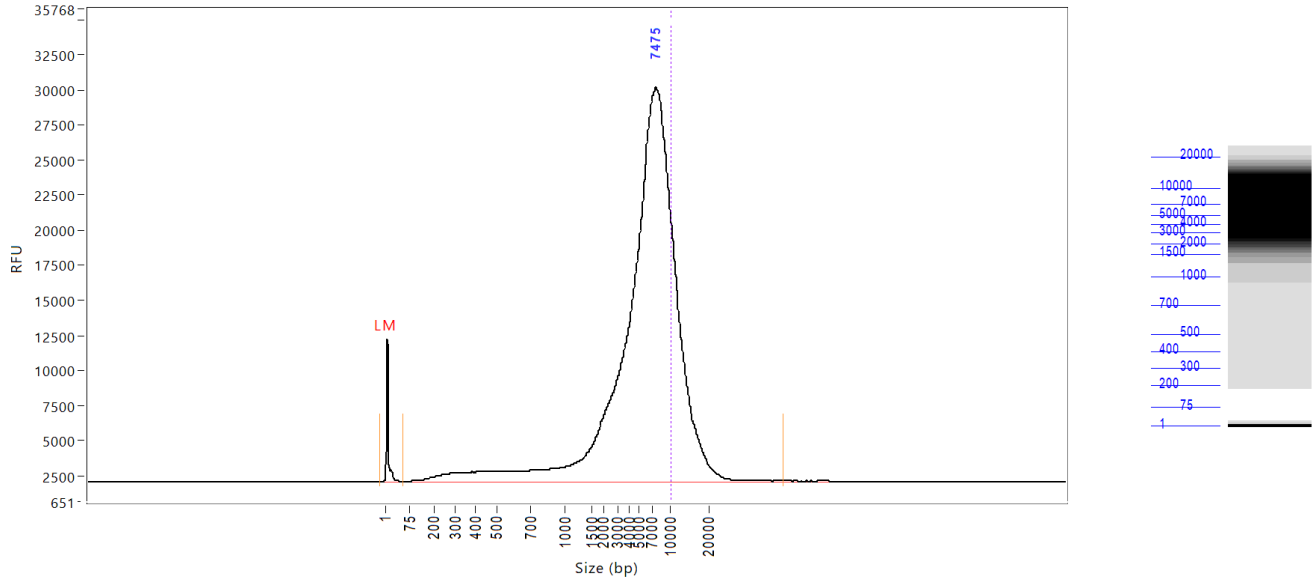

| Peak         | Size (bp) | Conc. (ng/uL) | From (bp) | To (bp) | Avg. Size (bp) | CV%    | RFU   | Corr. Peak Area |
|--------------|-----------|---------------|-----------|---------|----------------|--------|-------|-----------------|
| 1            | 1 (LM)    | 0.0328        | 0         | 53      | 3              | 274.11 | 10198 | 70.844          |
| 2            | 7475      | 16.3699       | 53        | 39932   | 6638           | 63.17  | 28073 | 2946.118        |
| TIC:         |           | 16.3699       | ng/uL     |         |                |        |       |                 |
| TIM:         |           | 4.0599        | nmole/L   |         |                |        |       |                 |
| Total Conc.: |           | 16.4484       | ng/uL     |         |                |        |       |                 |
| GQN:         |           | 1.7           |           |         |                |        |       |                 |

Sample Peak Width (sec): 50    Sample Min Peak Height: 50    Sample Baseline V to V?: Y    Sample Baseline V to V pts: 3  
Sample Filter: Binomial    # of Pts for Filter: 3    Sample Start Region (min): 0    Sample End Region (min): 50  
Manual Baseline Start (min): 6    Manual Baseline End (min): 48  
Marker Peak Width (sec): 5    Marker Min Peak Height: 200    Marker Baseline V to V?: Y    Marker Baseline V to V pts: 3  
Lower Marker Selection: First Peak > 200 RFU    Upper Marker Selection: Last Peak > 200 RFU  
Ladder Size (bp): 1, 75, 200, 300, 400, 500, 700, 1000, 1500, 2000, 3000, 4000, 5000, 7000, 10000, 20000  
Quantification Using: Ladder    Final Concentration (ng/uL): 1.0417    Dilution Factor: 12.0  
Size Threshold (b.p.): 10000

**Data File:** 2019 06 18 13H 16M.raw  
**Sample:** 103613-001-032 (20x dil.)  
**Well Location:** H4

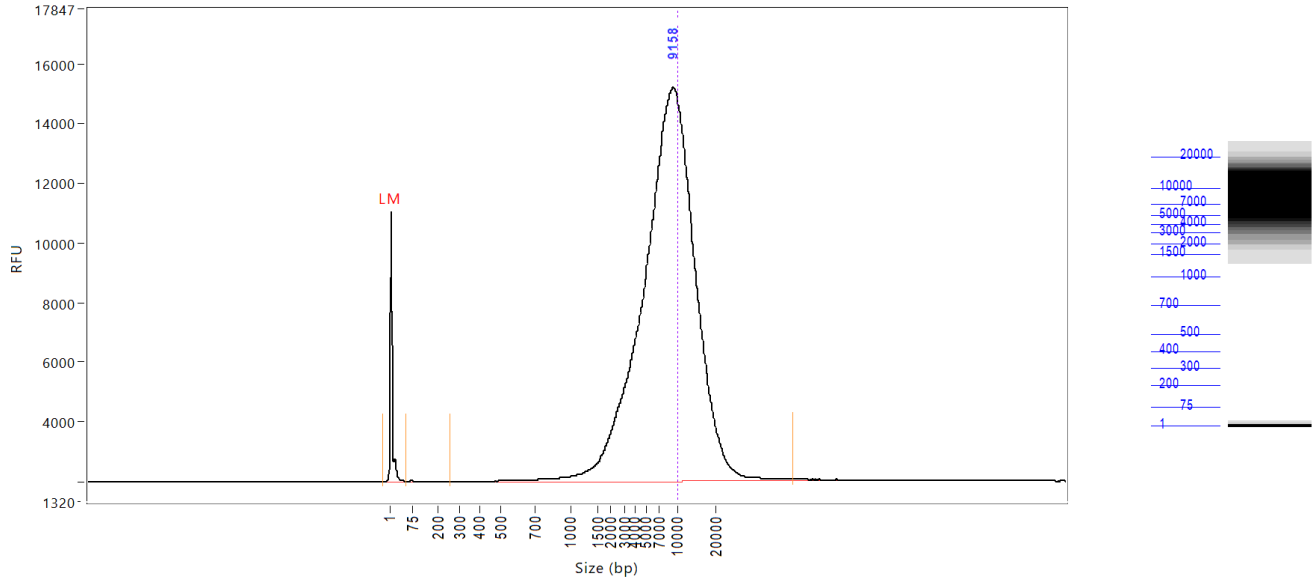

| Peak         | Size (bp) | Conc. (ng/uL) | From (bp) | To (bp) | Avg. Size (bp) | CV%    | RFU   | Corr. Peak Area |
|--------------|-----------|---------------|-----------|---------|----------------|--------|-------|-----------------|
| 1            | 1 (LM)    | 0.0328        | 0         | 50      | 2              | 301.08 | 9030  | 61.905          |
| 2            | 9158      | 9.6901        | 253       | 40018   | 8832           | 54.26  | 13188 | 1523.895        |
| TIC:         |           | 9.6901        | ng/uL     |         |                |        |       |                 |
| TIM:         |           | 1.8063        | nmole/L   |         |                |        |       |                 |
| Total Conc.: |           | 9.7610        | ng/uL     |         |                |        |       |                 |
| GQN:         |           | 3.4           |           |         |                |        |       |                 |

Sample Peak Width (sec): 50    Sample Min Peak Height: 50    Sample Baseline V to V?: Y    Sample Baseline V to V pts: 3  
Sample Filter: Binomial    # of Pts for Filter: 3    Sample Start Region (min): 0    Sample End Region (min): 50  
Manual Baseline Start (min): 6    Manual Baseline End (min): 48  
Marker Peak Width (sec): 5    Marker Min Peak Height: 200    Marker Baseline V to V?: Y    Marker Baseline V to V pts: 3  
Lower Marker Selection: First Peak > 200 RFU    Upper Marker Selection: Last Peak > 200 RFU  
Ladder Size (bp): 1, 75, 200, 300, 400, 500, 700, 1000, 1500, 2000, 3000, 4000, 5000, 7000, 10000, 20000  
Quantification Using: Ladder    Final Concentration (ng/uL): 1.0417    Dilution Factor: 12.0  
Size Threshold (b.p.): 10000



**Data File:** 2019 06 18 13H 16M.raw  
**Sample:** 103613-001-033 (20x dil.)  
**Well Location:** A5

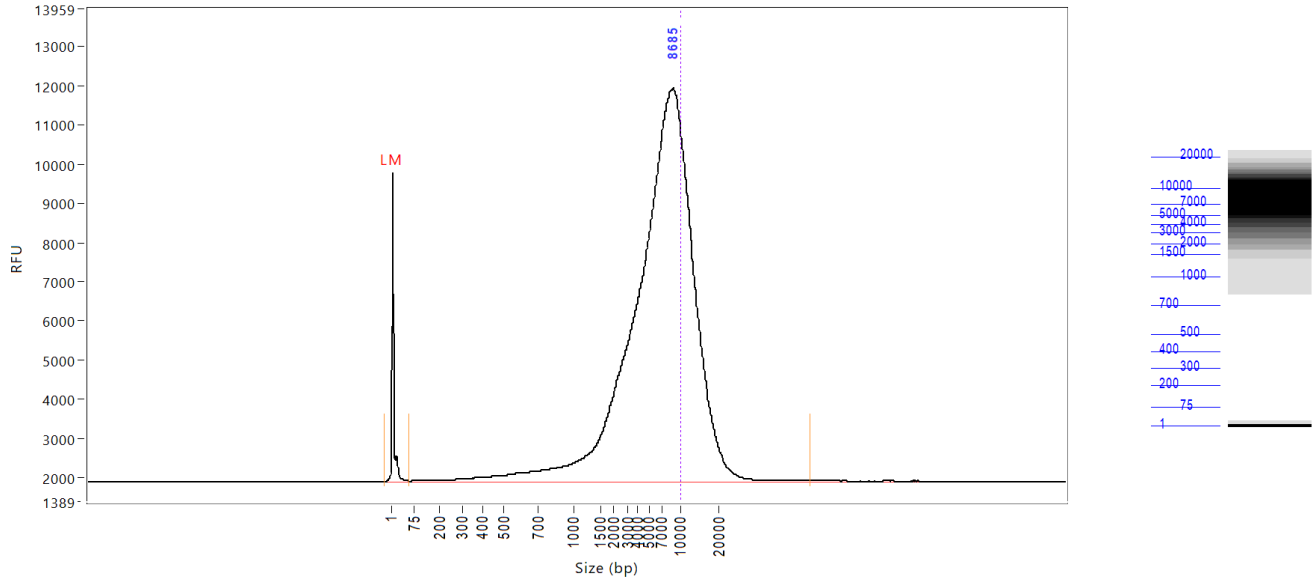

| Peak         | Size (bp) | Conc. (ng/uL) | From (bp) | To (bp) | Avg. Size (bp) | CV%    | RFU   | Corr. Peak Area |
|--------------|-----------|---------------|-----------|---------|----------------|--------|-------|-----------------|
| 1            | 1 (LM)    | 0.0328        | 0         | 55      | 2              | 318.46 | 7874  | 54.094          |
| 2            | 8685      | 8.9815        | 55        | 43556   | 7314           | 62.80  | 10042 | 1234.258        |
| TIC:         |           | 8.9815        | ng/uL     |         |                |        |       |                 |
| TIM:         |           | 2.0216        | nmole/L   |         |                |        |       |                 |
| Total Conc.: |           | 9.0065        | ng/uL     |         |                |        |       |                 |
| GQN:         |           | 2.4           |           |         |                |        |       |                 |

Sample Peak Width (sec): 50    Sample Min Peak Height: 50    Sample Baseline V to V?: Y    Sample Baseline V to V pts: 3  
Sample Filter: Binomial    # of Pts for Filter: 3    Sample Start Region (min): 0    Sample End Region (min): 50  
Manual Baseline Start (min): 6    Manual Baseline End (min): 48  
Marker Peak Width (sec): 5    Marker Min Peak Height: 200    Marker Baseline V to V?: Y    Marker Baseline V to V pts: 3  
Lower Marker Selection: First Peak > 200 RFU    Upper Marker Selection: Last Peak > 200 RFU  
Ladder Size (bp): 1, 75, 200, 300, 400, 500, 700, 1000, 1500, 2000, 3000, 4000, 5000, 7000, 10000, 20000  
Quantification Using: Ladder    Final Concentration (ng/uL): 1.0417    Dilution Factor: 12.0  
Size Threshold (b.p.): 10000

Data File: 2019 06 18 13H 16M.raw

Sample: 103613-001-034 (20x dil.)

Well Location: B5

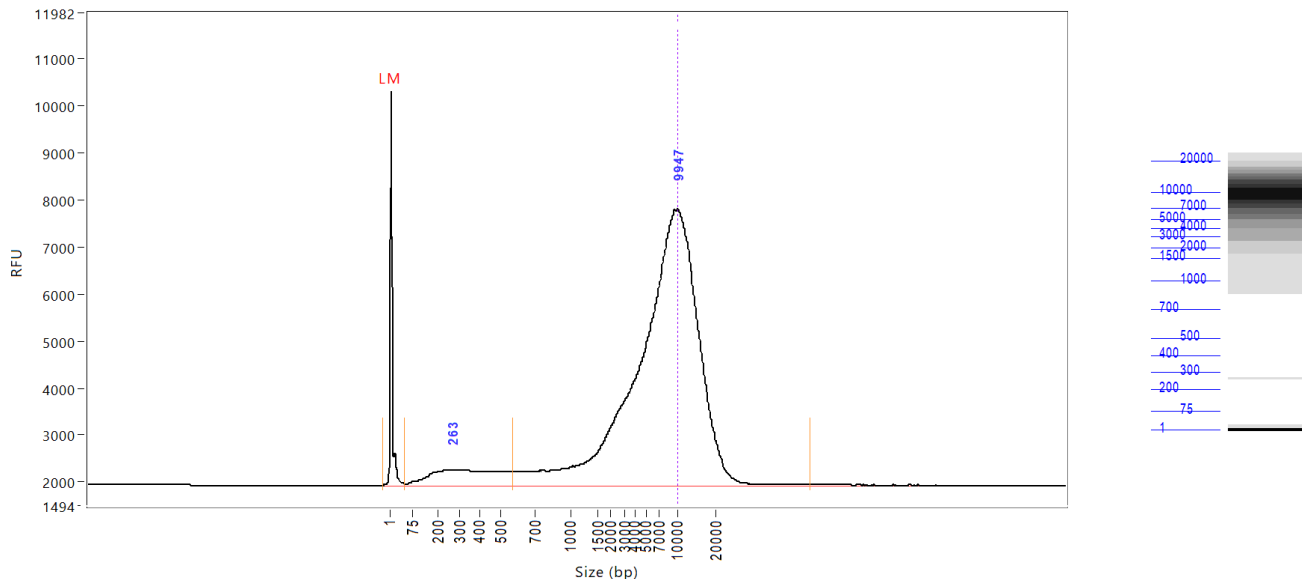

| Peak         | Size (bp) | Conc. (ng/uL) | From (bp) | To (bp) | Avg. Size (bp) | CV%    | RFU  | Corr. Peak Area |
|--------------|-----------|---------------|-----------|---------|----------------|--------|------|-----------------|
| 1            | 1 (LM)    | 0.0328        | 0         | 44      | 2              | 297.83 | 8374 | 57.654          |
| 2            | 263       | 0.4928        | 44        | 558     | 317            | 41.14  | 325  | 72.173          |
| 3            | 9947      | 5.4007        | 558       | 44591   | 8195           | 63.71  | 5880 | 791.017         |
| TIC:         |           | 5.8935        | ng/uL     |         |                |        |      |                 |
| TIM:         |           | 3.6421        | nmole/L   |         |                |        |      |                 |
| Total Conc.: |           | 5.9084        | ng/uL     |         |                |        |      |                 |
| GQN:         |           | 3.0           |           |         |                |        |      |                 |

Sample Peak Width (sec): 50    Sample Min Peak Height: 50    Sample Baseline V to V?: Y    Sample Baseline V to V pts: 3  
 Sample Filter: Binomial    # of Pts for Filter: 3    Sample Start Region (min): 0    Sample End Region (min): 50  
 Manual Baseline Start (min): 6    Manual Baseline End (min): 48  
 Marker Peak Width (sec): 5    Marker Min Peak Height: 200    Marker Baseline V to V?: Y    Marker Baseline V to V pts: 3  
 Lower Marker Selection: First Peak > 200 RFU    Upper Marker Selection: Last Peak > 200 RFU  
 Ladder Size (bp): 1, 75, 200, 300, 400, 500, 700, 1000, 1500, 2000, 3000, 4000, 5000, 7000, 10000, 20000  
 Quantification Using: Ladder    Final Concentration (ng/uL): 1.0417    Dilution Factor: 12.0  
 Size Threshold (b.p.): 10000

**Data File:** 2019 06 18 13H 16M.raw  
**Sample:** 103613-001-035 (20x dil.)  
**Well Location:** C5

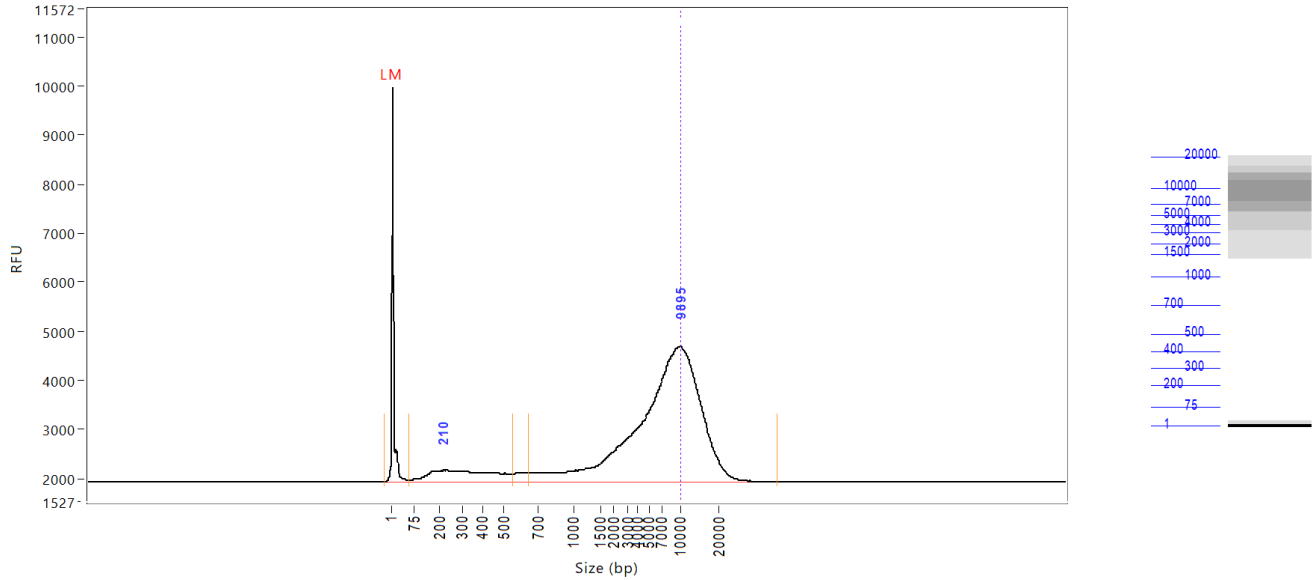

| Peak         | Size (bp) | Conc. (ng/uL) | From (bp) | To (bp) | Avg. Size (bp) | CV%    | RFU  | Corr. Peak Area |
|--------------|-----------|---------------|-----------|---------|----------------|--------|------|-----------------|
| 1            | 1 (LM)    | 0.0328        | 0         | 54      | 2              | 383.43 | 8030 | 57.469          |
| 2            | 210       | 0.3148        | 54        | 552     | 301            | 42.50  | 222  | 45.966          |
| 3            | 9895      | 2.5254        | 643       | 35186   | 8001           | 62.29  | 2771 | 368.686         |
| TIC:         |           | 2.8402        | ng/uL     |         |                |        |      |                 |
| TIM:         |           | 2.2402        | nmole/L   |         |                |        |      |                 |
| Total Conc.: |           | 2.8892        | ng/uL     |         |                |        |      |                 |
| GQN:         |           | 2.8           |           |         |                |        |      |                 |

Sample Peak Width (sec): 50    Sample Min Peak Height: 50    Sample Baseline V to V?: Y    Sample Baseline V to V pts: 3  
Sample Filter: Binomial    # of Pts for Filter: 3    Sample Start Region (min): 0    Sample End Region (min): 50  
Manual Baseline Start (min): 6    Manual Baseline End (min): 48  
Marker Peak Width (sec): 5    Marker Min Peak Height: 200    Marker Baseline V to V?: Y    Marker Baseline V to V pts: 3  
Lower Marker Selection: First Peak > 200 RFU    Upper Marker Selection: Last Peak > 200 RFU  
Ladder Size (bp): 1, 75, 200, 300, 400, 500, 700, 1000, 1500, 2000, 3000, 4000, 5000, 7000, 10000, 20000  
Quantification Using: Ladder    Final Concentration (ng/uL): 1.0417    Dilution Factor: 12.0  
Size Threshold (b.p.): 10000

**Data File:** 2019 06 18 13H 16M.raw  
**Sample:** 103613-001-036 (20x dil.)  
**Well Location:** D5

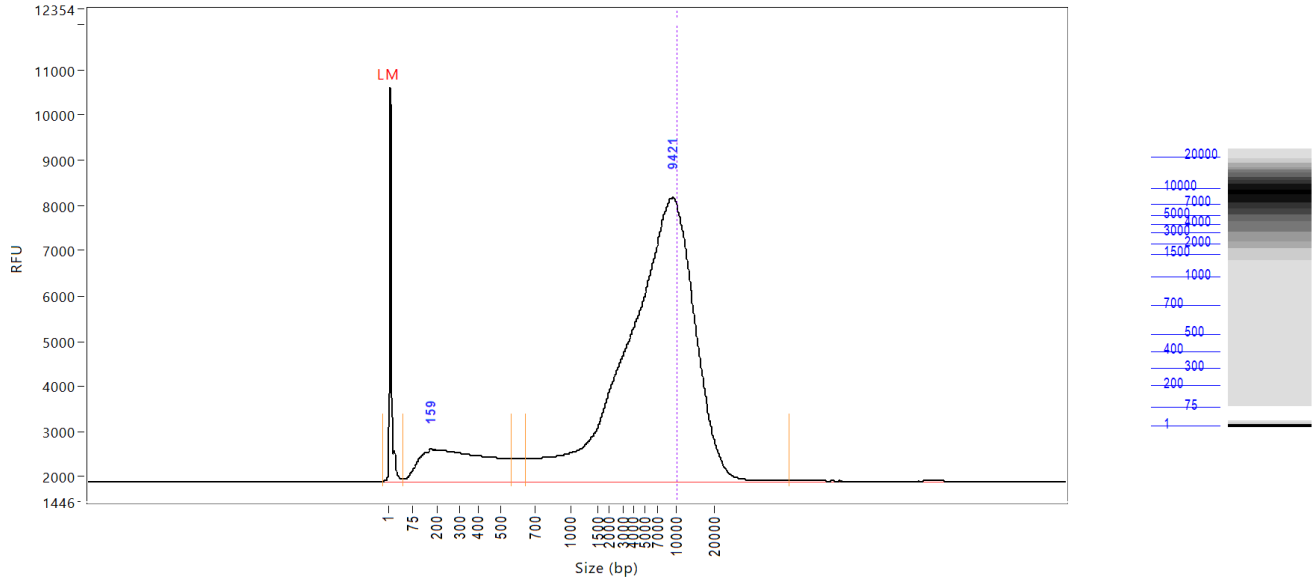

| Peak         | Size (bp) | Conc. (ng/uL) | From (bp) | To (bp) | Avg. Size (bp) | CV%    | RFU  | Corr. Peak Area |
|--------------|-----------|---------------|-----------|---------|----------------|--------|------|-----------------|
| 1            | 1 (LM)    | 0.0328        | 0         | 45      | 3              | 282.44 | 8718 | 60.522          |
| 2            | 159       | 1.0341        | 45        | 560     | 289            | 46.89  | 722  | 159.000         |
| 3            | 9421      | 6.1431        | 643       | 39500   | 7365           | 68.17  | 6297 | 944.511         |
| TIC:         |           | 7.1773        | ng/uL     |         |                |        |      |                 |
| TIM:         |           | 7.2591        | nmole/L   |         |                |        |      |                 |
| Total Conc.: |           | 7.3029        | ng/uL     |         |                |        |      |                 |
| GQN:         |           | 2.3           |           |         |                |        |      |                 |

Sample Peak Width (sec): 50    Sample Min Peak Height: 50    Sample Baseline V to V?: Y    Sample Baseline V to V pts: 3  
Sample Filter: Binomial    # of Pts for Filter: 3    Sample Start Region (min): 0    Sample End Region (min): 50  
Manual Baseline Start (min): 6    Manual Baseline End (min): 48  
Marker Peak Width (sec): 5    Marker Min Peak Height: 200    Marker Baseline V to V?: Y    Marker Baseline V to V pts: 3  
Lower Marker Selection: First Peak > 200 RFU    Upper Marker Selection: Last Peak > 200 RFU  
Ladder Size (bp): 1, 75, 200, 300, 400, 500, 700, 1000, 1500, 2000, 3000, 4000, 5000, 7000, 10000, 20000  
Quantification Using: Ladder    Final Concentration (ng/uL): 1.0417    Dilution Factor: 12.0  
Size Threshold (b.p.): 10000

**Data File:** 2019 06 18 13H 16M.raw  
**Sample:** 103613-001-037 (20x dil.)  
**Well Location:** E5

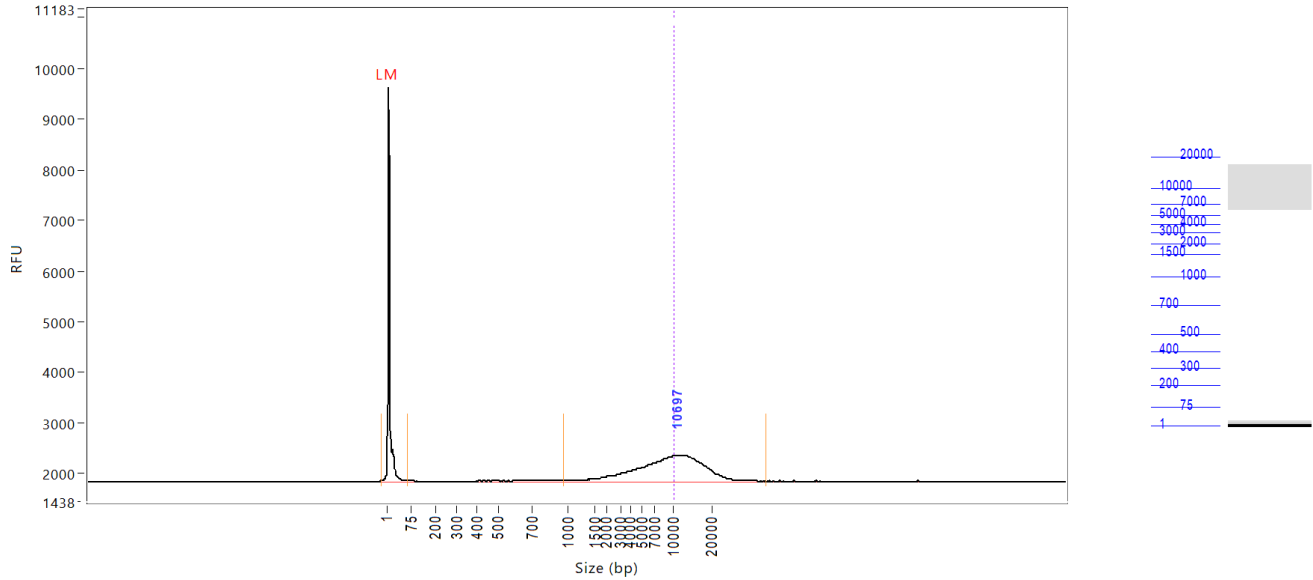

| Peak         | Size (bp) | Conc. (ng/uL) | From (bp) | To (bp) | Avg. Size (bp) | CV%    | RFU  | Corr. Peak Area |
|--------------|-----------|---------------|-----------|---------|----------------|--------|------|-----------------|
| 1            | 1 (LM)    | 0.0328        | 0         | 62      | 3              | 270.74 | 7783 | 54.599          |
| 2            | 10697     | 0.5855        | 966       | 34582   | 10189          | 57.98  | 513  | 81.216          |
| TIC:         |           | 0.5855        | ng/uL     |         |                |        |      |                 |
| TIM:         |           | 0.0946        | nmole/L   |         |                |        |      |                 |
| Total Conc.: |           | 0.6478        | ng/uL     |         |                |        |      |                 |
| GQN:         |           | 4.5           |           |         |                |        |      |                 |

Sample Peak Width (sec): 50    Sample Min Peak Height: 50    Sample Baseline V to V?: Y    Sample Baseline V to V pts: 3  
 Sample Filter: Binomial    # of Pts for Filter: 3    Sample Start Region (min): 0    Sample End Region (min): 50  
 Manual Baseline Start (min): 6    Manual Baseline End (min): 48  
 Marker Peak Width (sec): 5    Marker Min Peak Height: 200    Marker Baseline V to V?: Y    Marker Baseline V to V pts: 3  
 Lower Marker Selection: First Peak > 200 RFU    Upper Marker Selection: Last Peak > 200 RFU  
 Ladder Size (bp): 1, 75, 200, 300, 400, 500, 700, 1000, 1500, 2000, 3000, 4000, 5000, 7000, 10000, 20000  
 Quantification Using: Ladder    Final Concentration (ng/uL): 1.0417    Dilution Factor: 12.0  
 Size Threshold (b.p.): 10000

Data File: 2019 06 18 13H 16M.raw

Sample: 103613-001-038 (20x dil.)

Well Location: F5

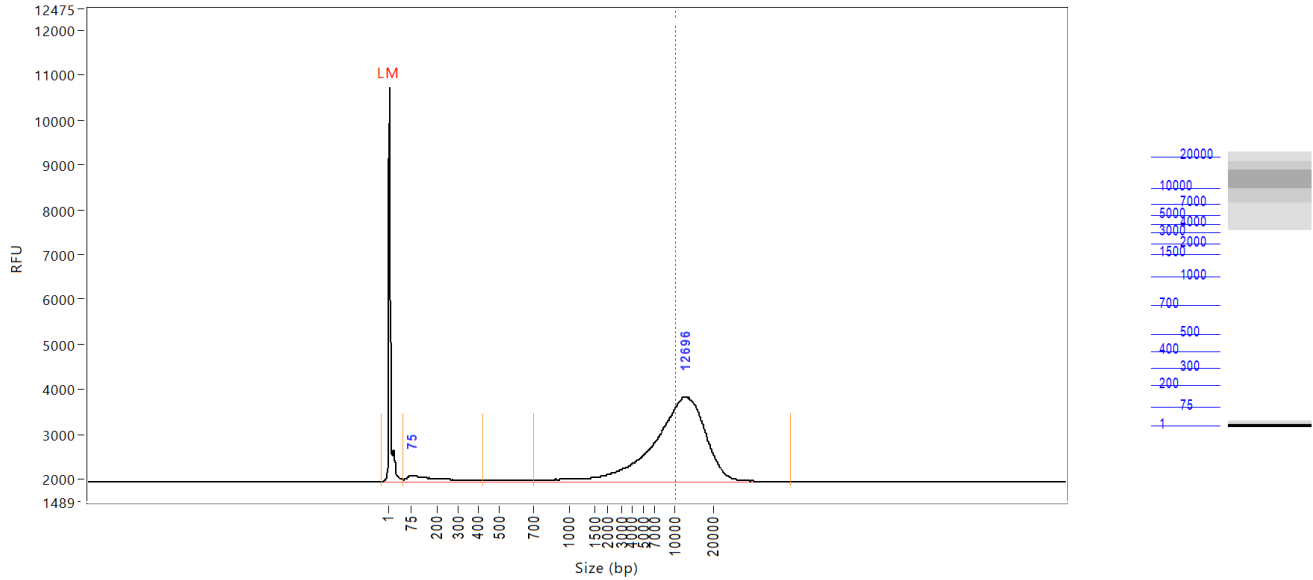

| Peak         | Size (bp) | Conc. (ng/uL) | From (bp) | To (bp) | Avg. Size (bp) | CV%    | RFU  | Corr. Peak Area |
|--------------|-----------|---------------|-----------|---------|----------------|--------|------|-----------------|
| 1            | 1 (LM)    | 0.0328        | 0         | 46      | 3              | 258.08 | 8782 | 62.008          |
| 2            | 75        | 0.0939        | 46        | 422     | 175            | 58.71  | 140  | 14.791          |
| 3            | 12696     | 1.5318        | 700       | 40450   | 10907          | 50.53  | 1881 | 241.300         |
| TIC:         |           | 1.6257        | ng/uL     |         |                |        |      |                 |
| TIM:         |           | 1.1132        | nmole/L   |         |                |        |      |                 |
| Total Conc.: |           | 1.6615        | ng/uL     |         |                |        |      |                 |
| GQN:         |           | 4.9           |           |         |                |        |      |                 |

Sample Peak Width (sec): 50    Sample Min Peak Height: 50    Sample Baseline V to V?: Y    Sample Baseline V to V pts: 3  
 Sample Filter: Binomial    # of Pts for Filter: 3    Sample Start Region (min): 0    Sample End Region (min): 50  
 Manual Baseline Start (min): 6    Manual Baseline End (min): 48  
 Marker Peak Width (sec): 5    Marker Min Peak Height: 200    Marker Baseline V to V?: Y    Marker Baseline V to V pts: 3  
 Lower Marker Selection: First Peak > 200 RFU    Upper Marker Selection: Last Peak > 200 RFU  
 Ladder Size (bp): 1, 75, 200, 300, 400, 500, 700, 1000, 1500, 2000, 3000, 4000, 5000, 7000, 10000, 20000  
 Quantification Using: Ladder    Final Concentration (ng/uL): 1.0417    Dilution Factor: 12.0  
 Size Threshold (b.p.): 10000

**Data File:** 2019 06 18 13H 16M.raw  
**Sample:** 103613-001-039 (20x dil.)  
**Well Location:** G5

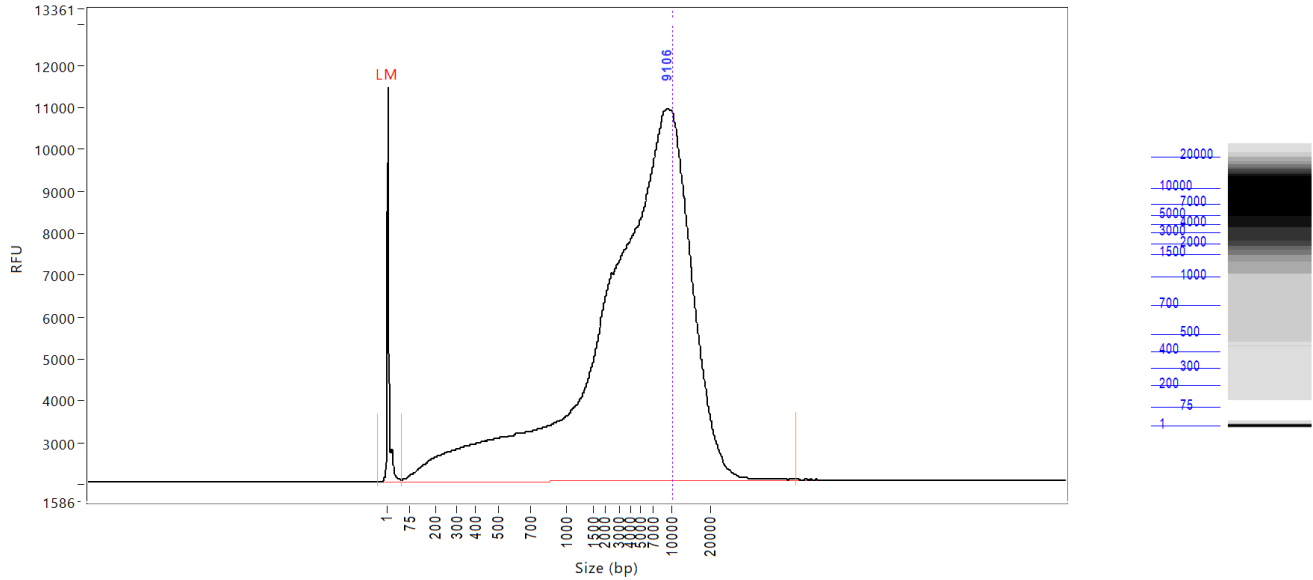

| Peak | Size (bp) | Conc. (ng/uL) | From (bp) | To (bp) | Avg. Size (bp) | CV%    | RFU  | Corr. Peak Area |
|------|-----------|---------------|-----------|---------|----------------|--------|------|-----------------|
| 1    | 1 (LM)    | 0.0328        | 0         | 45      | 2              | 321.85 | 9403 | 65.200          |
| 2    | 9106      | 10.9912       | 45        | 42607   | 5914           | 90.91  | 8883 | 1820.521        |

TIC: 10.9912 ng/uL  
 TIM: 3.0596 nmole/L  
 Total Conc.: 11.0192 ng/uL  
 GQN: 2.1

Sample Peak Width (sec): 50    Sample Min Peak Height: 50    Sample Baseline V to V?: Y    Sample Baseline V to V pts: 3  
 Sample Filter: Binomial    # of Pts for Filter: 3    Sample Start Region (min): 0    Sample End Region (min): 50  
 Manual Baseline Start (min): 6    Manual Baseline End (min): 48  
 Marker Peak Width (sec): 5    Marker Min Peak Height: 200    Marker Baseline V to V?: Y    Marker Baseline V to V pts: 3  
 Lower Marker Selection: First Peak > 200 RFU    Upper Marker Selection: Last Peak > 200 RFU  
 Ladder Size (bp): 1, 75, 200, 300, 400, 500, 700, 1000, 1500, 2000, 3000, 4000, 5000, 7000, 10000, 20000  
 Quantification Using: Ladder    Final Concentration (ng/uL): 1.0417    Dilution Factor: 12.0  
 Size Threshold (b.p.): 10000

Data File: 2019 06 18 13H 16M.raw  
 Sample: 103613-001-040 (20x dil.)  
 Well Location: H5

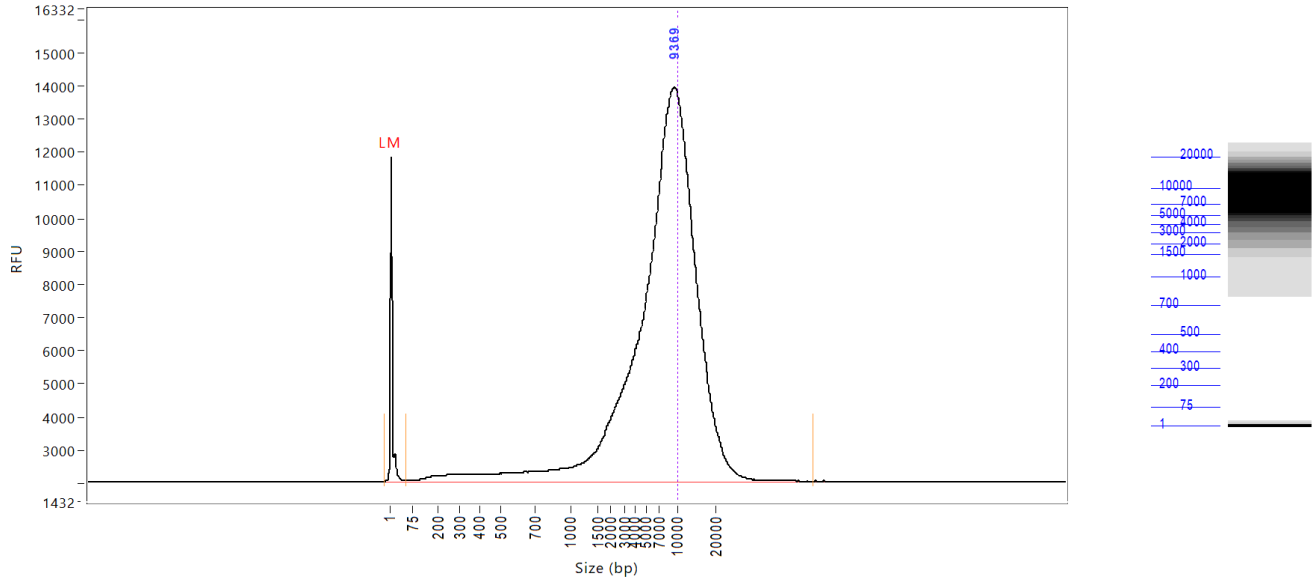

| Peak         | Size (bp) | Conc. (ng/uL) | From (bp) | To (bp) | Avg. Size (bp) | CV%    | RFU   | Corr. Peak Area |
|--------------|-----------|---------------|-----------|---------|----------------|--------|-------|-----------------|
| 1            | 1 (LM)    | 0.0328        | 0         | 49      | 3              | 274.98 | 9799  | 68.313          |
| 2            | 9369      | 8.4587        | 49        | 45454   | 8205           | 62.76  | 11913 | 1467.936        |
| TIC:         |           | 8.4587        | ng/uL     |         |                |        |       |                 |
| TIM:         |           | 1.6972        | nmole/L   |         |                |        |       |                 |
| Total Conc.: |           | 8.4827        | ng/uL     |         |                |        |       |                 |
| GQN:         |           | 3.2           |           |         |                |        |       |                 |

Sample Peak Width (sec): 50    Sample Min Peak Height: 50    Sample Baseline V to V?: Y    Sample Baseline V to V pts: 3  
 Sample Filter: Binomial    # of Pts for Filter: 3    Sample Start Region (min): 0    Sample End Region (min): 50  
 Manual Baseline Start (min): 6    Manual Baseline End (min): 48  
 Marker Peak Width (sec): 5    Marker Min Peak Height: 200    Marker Baseline V to V?: Y    Marker Baseline V to V pts: 3  
 Lower Marker Selection: First Peak > 200 RFU    Upper Marker Selection: Last Peak > 200 RFU  
 Ladder Size (bp): 1, 75, 200, 300, 400, 500, 700, 1000, 1500, 2000, 3000, 4000, 5000, 7000, 10000, 20000  
 Quantification Using: Ladder    Final Concentration (ng/uL): 1.0417    Dilution Factor: 12.0  
 Size Threshold (b.p.): 10000



**Data File:** 2019 06 18 13H 16M.raw  
**Sample:** 103613-001-041 (20x dil.)  
**Well Location:** A6

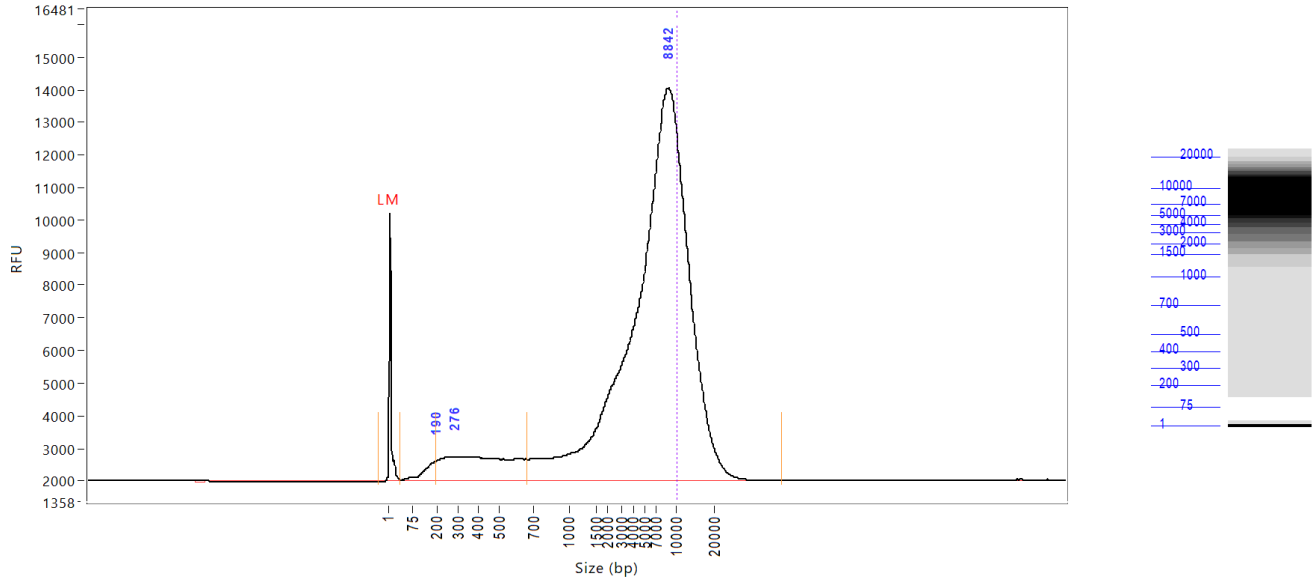

| Peak         | Size (bp) | Conc. (ng/uL) | From (bp) | To (bp) | Avg. Size (bp) | CV%    | RFU   | Corr. Peak Area |
|--------------|-----------|---------------|-----------|---------|----------------|--------|-------|-----------------|
| 1            | 1 (LM)    | 0.0328        | 0         | 35      | 2              | 280.15 | 8174  | 53.964          |
| 2            | 190       | 0.1712        | 35        | 192     | 145            | 25.40  | 588   | 23.469          |
| 3            | 276       | 1.1303        | 192       | 657     | 400            | 32.78  | 717   | 154.948         |
| 4            | 8842      | 10.3208       | 657       | 37602   | 7423           | 60.51  | 12036 | 1414.884        |
| TIC:         |           | 11.6222       | ng/uL     |         |                |        |       |                 |
| TIM:         |           | 8.8783        | nmole/L   |         |                |        |       |                 |
| Total Conc.: |           | 11.6176       | ng/uL     |         |                |        |       |                 |
| GQN:         |           | 2.2           |           |         |                |        |       |                 |

Sample Peak Width (sec): 50    Sample Min Peak Height: 50    Sample Baseline V to V?: Y    Sample Baseline V to V pts: 3  
Sample Filter: Binomial    # of Pts for Filter: 3    Sample Start Region (min): 0    Sample End Region (min): 50  
Manual Baseline Start (min): 6    Manual Baseline End (min): 48  
Marker Peak Width (sec): 5    Marker Min Peak Height: 200    Marker Baseline V to V?: Y    Marker Baseline V to V pts: 3  
Lower Marker Selection: First Peak > 200 RFU    Upper Marker Selection: Last Peak > 200 RFU  
Ladder Size (bp): 1, 75, 200, 300, 400, 500, 700, 1000, 1500, 2000, 3000, 4000, 5000, 7000, 10000, 20000  
Quantification Using: Ladder    Final Concentration (ng/uL): 1.0417    Dilution Factor: 12.0  
Size Threshold (b.p.): 10000

Data File: 2019 06 18 13H 16M.raw

Sample: 103613-001-042 (20x dil.)

Well Location: B6

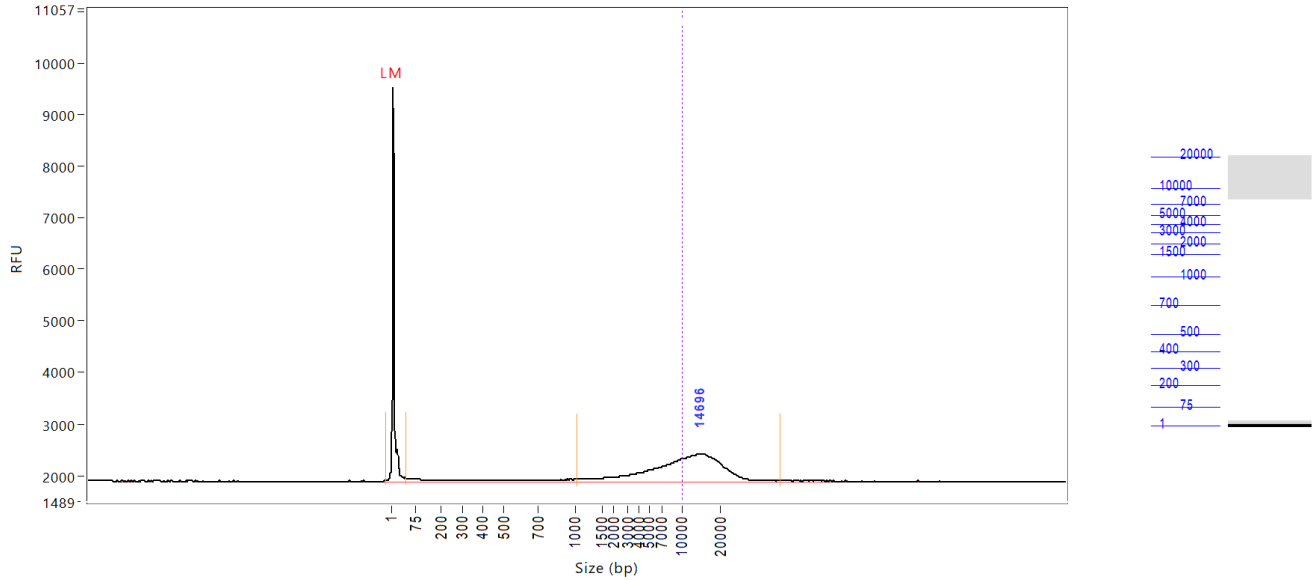

| Peak         | Size (bp) | Conc. (ng/uL) | From (bp) | To (bp) | Avg. Size (bp) | CV%    | RFU  | Corr. Peak Area |
|--------------|-----------|---------------|-----------|---------|----------------|--------|------|-----------------|
| 1            | 1 (LM)    | 0.0328        | 0         | 45      | 3              | 272.13 | 7638 | 53.675          |
| 2            | 14696     | 0.6437        | 1020      | 35790   | 11614          | 55.76  | 532  | 87.769          |
| TIC:         |           | 0.6437        | ng/uL     |         |                |        |      |                 |
| TIM:         |           | 0.0912        | nmole/L   |         |                |        |      |                 |
| Total Conc.: |           | 0.7446        | ng/uL     |         |                |        |      |                 |
| GQN:         |           | 5.0           |           |         |                |        |      |                 |

Sample Peak Width (sec): 50    Sample Min Peak Height: 50    Sample Baseline V to V?: Y    Sample Baseline V to V pts: 3  
 Sample Filter: Binomial    # of Pts for Filter: 3    Sample Start Region (min): 0    Sample End Region (min): 50  
 Manual Baseline Start (min): 6    Manual Baseline End (min): 48  
 Marker Peak Width (sec): 5    Marker Min Peak Height: 200    Marker Baseline V to V?: Y    Marker Baseline V to V pts: 3  
 Lower Marker Selection: First Peak > 200 RFU    Upper Marker Selection: Last Peak > 200 RFU  
 Ladder Size (bp): 1, 75, 200, 300, 400, 500, 700, 1000, 1500, 2000, 3000, 4000, 5000, 7000, 10000, 20000  
 Quantification Using: Ladder    Final Concentration (ng/uL): 1.0417    Dilution Factor: 12.0  
 Size Threshold (b.p.): 10000

**Data File:** 2019 06 18 13H 16M.raw  
**Sample:** 103613-001-043 (20x dil.)  
**Well Location:** C6

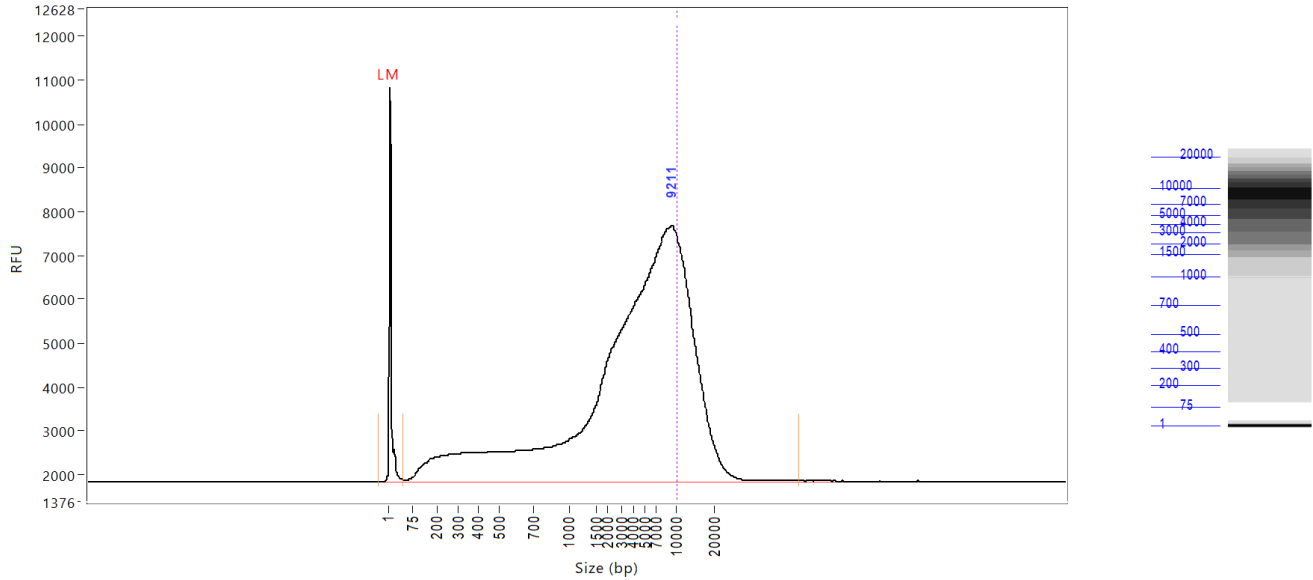

| Peak         | Size (bp) | Conc. (ng/uL) | From (bp) | To (bp) | Avg. Size (bp) | CV%    | RFU  | Corr. Peak Area |
|--------------|-----------|---------------|-----------|---------|----------------|--------|------|-----------------|
| 1            | 1 (LM)    | 0.0328        | 0         | 46      | 3              | 259.35 | 8995 | 63.234          |
| 2            | 9211      | 7.4777        | 46        | 42262   | 5643           | 91.65  | 5841 | 1201.227        |
| TIC:         |           | 7.4777        | ng/uL     |         |                |        |      |                 |
| TIM:         |           | 2.1816        | nmole/L   |         |                |        |      |                 |
| Total Conc.: |           | 7.5011        | ng/uL     |         |                |        |      |                 |
| GQN:         |           | 1.9           |           |         |                |        |      |                 |

Sample Peak Width (sec): 50    Sample Min Peak Height: 50    Sample Baseline V to V?: Y    Sample Baseline V to V pts: 3  
 Sample Filter: Binomial    # of Pts for Filter: 3    Sample Start Region (min): 0    Sample End Region (min): 50  
 Manual Baseline Start (min): 6    Manual Baseline End (min): 48  
 Marker Peak Width (sec): 5    Marker Min Peak Height: 200    Marker Baseline V to V?: Y    Marker Baseline V to V pts: 3  
 Lower Marker Selection: First Peak > 200 RFU    Upper Marker Selection: Last Peak > 200 RFU  
 Ladder Size (bp): 1, 75, 200, 300, 400, 500, 700, 1000, 1500, 2000, 3000, 4000, 5000, 7000, 10000, 20000  
 Quantification Using: Ladder    Final Concentration (ng/uL): 1.0417    Dilution Factor: 12.0  
 Size Threshold (b.p.): 10000

**Data File:** 2019 06 18 13H 16M.raw  
**Sample:** 103613-001-044 (20x dil.)  
**Well Location:** D6

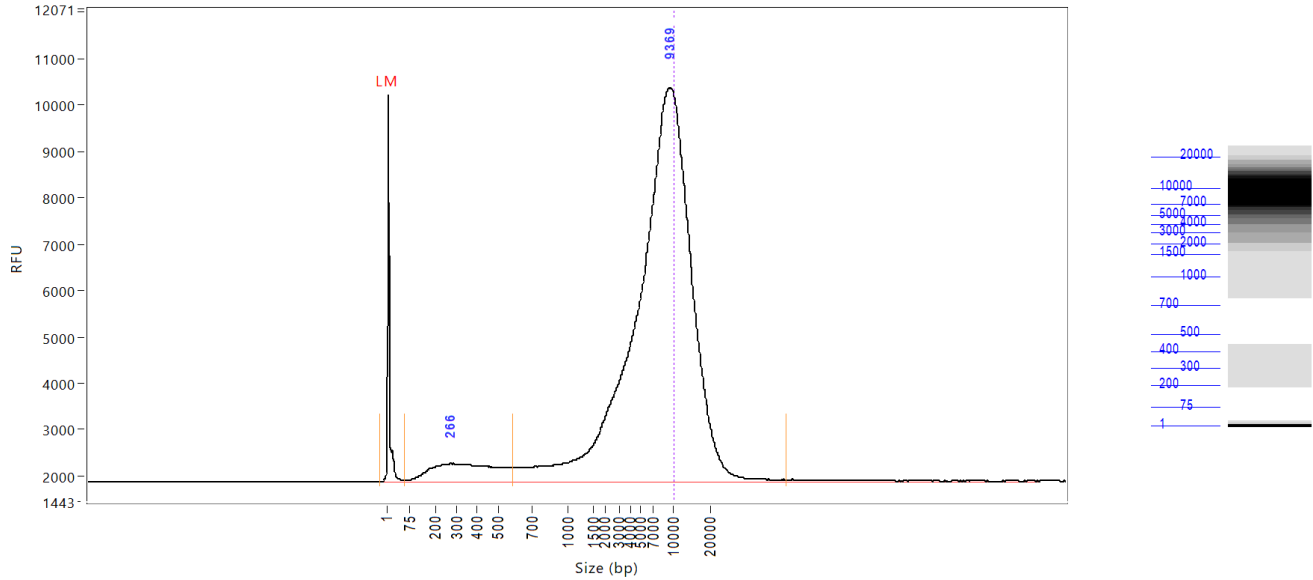

| Peak         | Size (bp) | Conc. (ng/uL) | From (bp) | To (bp) | Avg. Size (bp) | CV%    | RFU  | Corr. Peak Area |
|--------------|-----------|---------------|-----------|---------|----------------|--------|------|-----------------|
| 1            | 1 (LM)    | 0.0328        | 0         | 54      | 3              | 262.68 | 8332 | 58.386          |
| 2            | 266       | 0.5573        | 54        | 587     | 333            | 39.28  | 385  | 82.665          |
| 3            | 9369      | 7.0463        | 587       | 39759   | 8408           | 60.15  | 8489 | 1045.140        |
| TIC:         |           | 7.6036        | ng/uL     |         |                |        |      |                 |
| TIM:         |           | 4.1329        | nmole/L   |         |                |        |      |                 |
| Total Conc.: |           | 7.6465        | ng/uL     |         |                |        |      |                 |
| GQN:         |           | 3.1           |           |         |                |        |      |                 |

Sample Peak Width (sec): 50    Sample Min Peak Height: 50    Sample Baseline V to V?: Y    Sample Baseline V to V pts: 3  
Sample Filter: Binomial    # of Pts for Filter: 3    Sample Start Region (min): 0    Sample End Region (min): 50  
Manual Baseline Start (min): 6    Manual Baseline End (min): 48  
Marker Peak Width (sec): 5    Marker Min Peak Height: 200    Marker Baseline V to V?: Y    Marker Baseline V to V pts: 3  
Lower Marker Selection: First Peak > 200 RFU    Upper Marker Selection: Last Peak > 200 RFU  
Ladder Size (bp): 1, 75, 200, 300, 400, 500, 700, 1000, 1500, 2000, 3000, 4000, 5000, 7000, 10000, 20000  
Quantification Using: Ladder    Final Concentration (ng/uL): 1.0417    Dilution Factor: 12.0  
Size Threshold (b.p.): 10000

Data File: 2019 06 18 13H 16M.raw

Sample: 103613-001-045 (20x dil.)

Well Location: E6

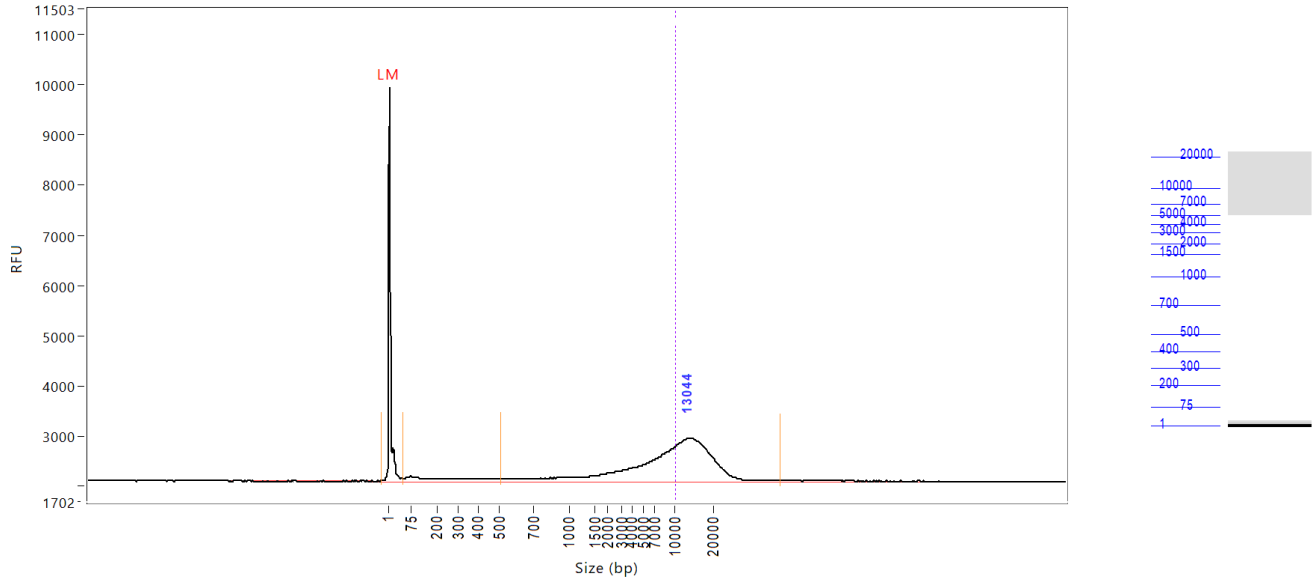

| Peak         | Size (bp) | Conc. (ng/uL) | From (bp) | To (bp) | Avg. Size (bp) | CV%    | RFU  | Corr. Peak Area |
|--------------|-----------|---------------|-----------|---------|----------------|--------|------|-----------------|
| 1            | 1 (LM)    | 0.0328        | 0         | 46      | 3              | 250.98 | 7822 | 55.407          |
| 2            | 13044     | 1.0278        | 503       | 37947   | 10348          | 65.67  | 843  | 144.667         |
| TIC:         |           | 1.0278        | ng/uL     |         |                |        |      |                 |
| TIM:         |           | 0.1635        | nmole/L   |         |                |        |      |                 |
| Total Conc.: |           | 1.1634        | ng/uL     |         |                |        |      |                 |
| GQN:         |           | 4.5           |           |         |                |        |      |                 |

Sample Peak Width (sec): 50    Sample Min Peak Height: 50    Sample Baseline V to V?: Y    Sample Baseline V to V pts: 3  
 Sample Filter: Binomial    # of Pts for Filter: 3    Sample Start Region (min): 0    Sample End Region (min): 50  
 Manual Baseline Start (min): 6    Manual Baseline End (min): 48  
 Marker Peak Width (sec): 5    Marker Min Peak Height: 200    Marker Baseline V to V?: Y    Marker Baseline V to V pts: 3  
 Lower Marker Selection: First Peak > 200 RFU    Upper Marker Selection: Last Peak > 200 RFU  
 Ladder Size (bp): 1, 75, 200, 300, 400, 500, 700, 1000, 1500, 2000, 3000, 4000, 5000, 7000, 10000, 20000  
 Quantification Using: Ladder    Final Concentration (ng/uL): 1.0417    Dilution Factor: 12.0  
 Size Threshold (b.p.): 10000

Data File: 2019 06 18 13H 16M.raw

Sample: 103613-001-046 (20x dil.)

Well Location: F6

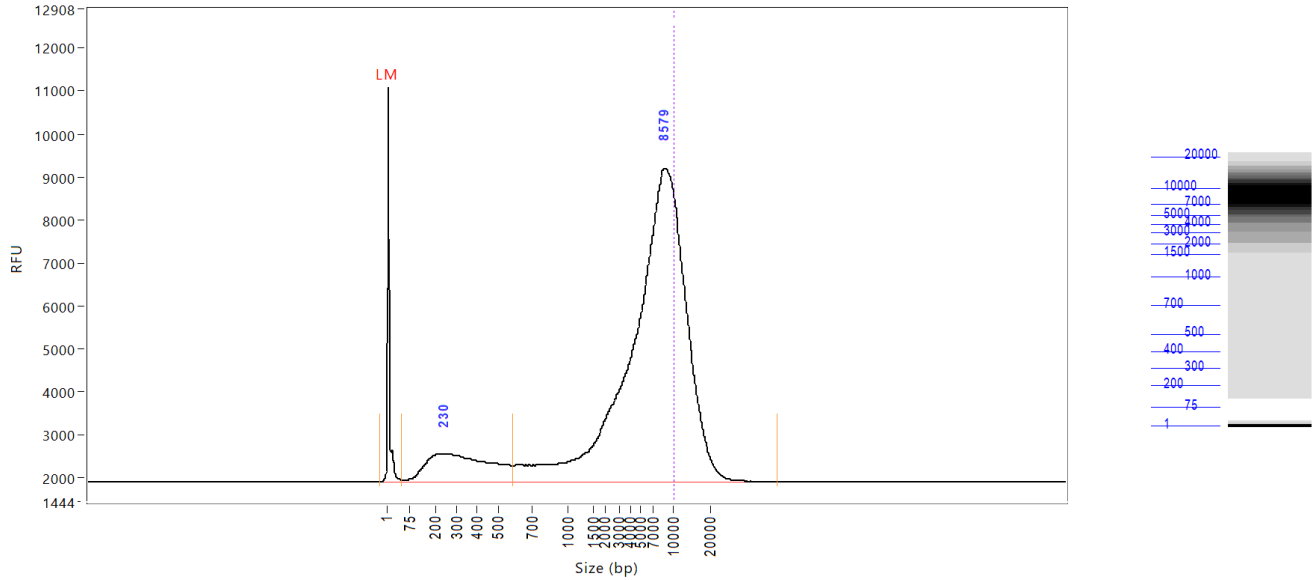

| Peak         | Size (bp) | Conc. (ng/uL) | From (bp) | To (bp) | Avg. Size (bp) | CV%    | RFU  | Corr. Peak Area |
|--------------|-----------|---------------|-----------|---------|----------------|--------|------|-----------------|
| 1            | 1 (LM)    | 0.0328        | 0         | 46      | 2              | 303.26 | 9165 | 63.509          |
| 2            | 230       | 0.8117        | 46        | 587     | 315            | 41.49  | 643  | 130.953         |
| 3            | 8579      | 5.4094        | 587       | 37688   | 7439           | 60.99  | 7288 | 872.752         |
| TIC:         |           | 6.2211        | ng/uL     |         |                |        |      |                 |
| TIM:         |           | 5.4358        | nmole/L   |         |                |        |      |                 |
| Total Conc.: |           | 6.2318        | ng/uL     |         |                |        |      |                 |
| GQN:         |           | 2.2           |           |         |                |        |      |                 |

Sample Peak Width (sec): 50    Sample Min Peak Height: 50    Sample Baseline V to V?: Y    Sample Baseline V to V pts: 3  
 Sample Filter: Binomial    # of Pts for Filter: 3    Sample Start Region (min): 0    Sample End Region (min): 50  
 Manual Baseline Start (min): 6    Manual Baseline End (min): 48  
 Marker Peak Width (sec): 5    Marker Min Peak Height: 200    Marker Baseline V to V?: Y    Marker Baseline V to V pts: 3  
 Lower Marker Selection: First Peak > 200 RFU    Upper Marker Selection: Last Peak > 200 RFU  
 Ladder Size (bp): 1, 75, 200, 300, 400, 500, 700, 1000, 1500, 2000, 3000, 4000, 5000, 7000, 10000, 20000  
 Quantification Using: Ladder    Final Concentration (ng/uL): 1.0417    Dilution Factor: 12.0  
 Size Threshold (b.p.): 10000

**Data File:** 2019 06 18 13H 16M.raw  
**Sample:** 103613-001-047 (20x dil.)  
**Well Location:** G6

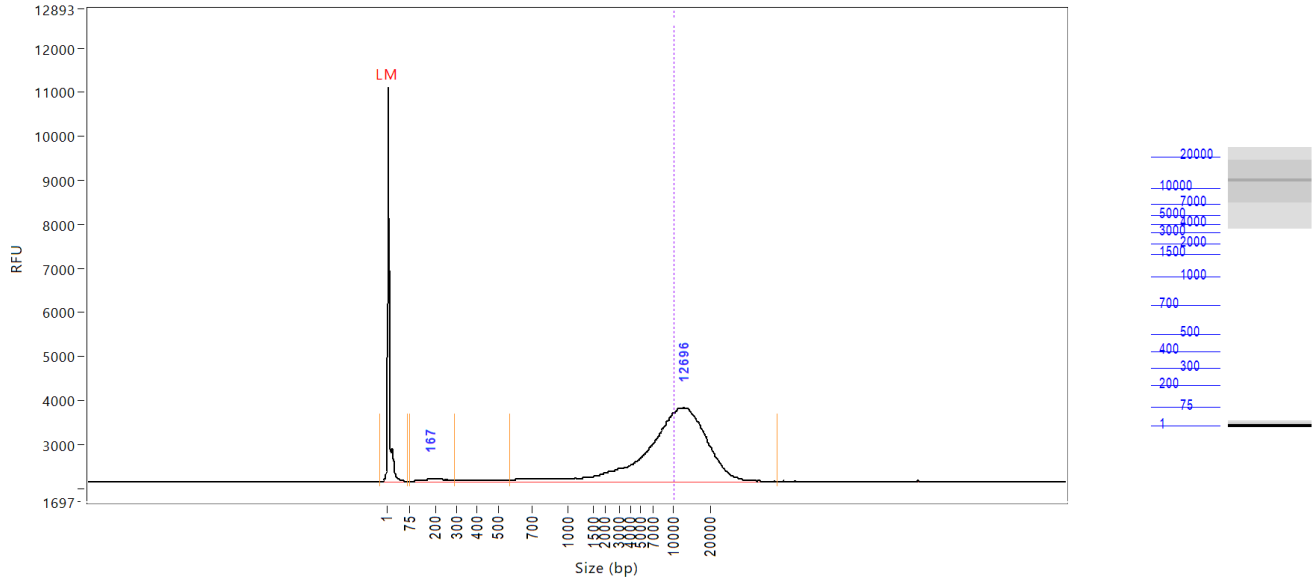

| Peak         | Size (bp) | Conc. (ng/uL) | From (bp) | To (bp) | Avg. Size (bp) | CV%    | RFU  | Corr. Peak Area |
|--------------|-----------|---------------|-----------|---------|----------------|--------|------|-----------------|
| 1            | 1 (LM)    | 0.0328        | 0         | 62      | 2              | 279.10 | 8944 | 62.212          |
| 2            | 167       | 0.0306        | 71        | 283     | 189            | 27.73  | 72   | 4.829           |
| 3            | 12696     | 1.5506        | 563       | 37775   | 10961          | 54.60  | 1666 | 245.065         |
| TIC:         |           | 1.5812        | ng/uL     |         |                |        |      |                 |
| TIM:         |           | 0.4987        | nmole/L   |         |                |        |      |                 |
| Total Conc.: |           | 1.6183        | ng/uL     |         |                |        |      |                 |
| GQN:         |           | 5.1           |           |         |                |        |      |                 |

Sample Peak Width (sec): 50    Sample Min Peak Height: 50    Sample Baseline V to V?: Y    Sample Baseline V to V pts: 3  
Sample Filter: Binomial    # of Pts for Filter: 3    Sample Start Region (min): 0    Sample End Region (min): 50  
Manual Baseline Start (min): 6    Manual Baseline End (min): 48  
Marker Peak Width (sec): 5    Marker Min Peak Height: 200    Marker Baseline V to V?: Y    Marker Baseline V to V pts: 3  
Lower Marker Selection: First Peak > 200 RFU    Upper Marker Selection: Last Peak > 200 RFU  
Ladder Size (bp): 1, 75, 200, 300, 400, 500, 700, 1000, 1500, 2000, 3000, 4000, 5000, 7000, 10000, 20000  
Quantification Using: Ladder    Final Concentration (ng/uL): 1.0417    Dilution Factor: 12.0  
Size Threshold (b.p.): 10000

Data File: 2019 06 18 13H 16M.raw

Sample: 103613-001-048 (20x dil.)

Well Location: H6

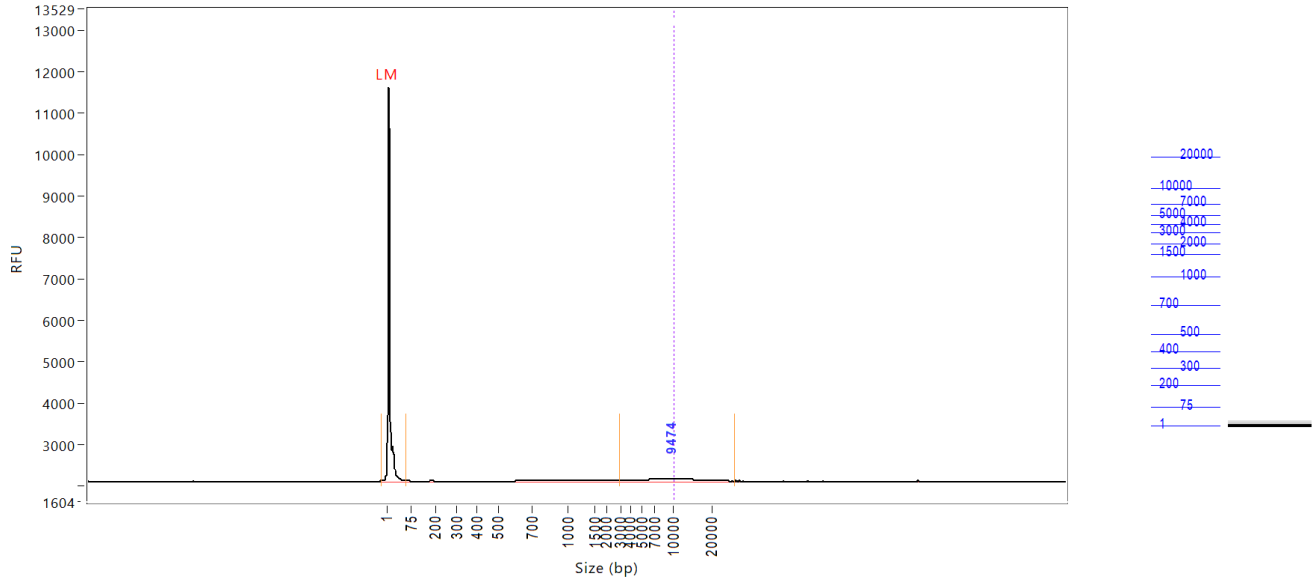

| Peak         | Size (bp) | Conc. (ng/uL) | From (bp) | To (bp) | Avg. Size (bp) | CV%    | RFU  | Corr. Peak Area |
|--------------|-----------|---------------|-----------|---------|----------------|--------|------|-----------------|
| 1            | 1 (LM)    | 0.0328        | 0         | 57      | 3              | 241.17 | 9522 | 68.529          |
| 2            | 9474      | 0.0508        | 2881      | 26299   | 10538          | 49.46  | 70   | 8.851           |
| TIC:         |           | 0.0508        | ng/uL     |         |                |        |      |                 |
| TIM:         |           | 0.0079        | nmole/L   |         |                |        |      |                 |
| Total Conc.: |           | 0.1010        | ng/uL     |         |                |        |      |                 |
| GQN:         |           | 3.8           |           |         |                |        |      |                 |

Sample Peak Width (sec): 50    Sample Min Peak Height: 50    Sample Baseline V to V?: Y    Sample Baseline V to V pts: 3  
 Sample Filter: Binomial    # of Pts for Filter: 3    Sample Start Region (min): 0    Sample End Region (min): 50  
 Manual Baseline Start (min): 6    Manual Baseline End (min): 48  
 Marker Peak Width (sec): 5    Marker Min Peak Height: 200    Marker Baseline V to V?: Y    Marker Baseline V to V pts: 3  
 Lower Marker Selection: First Peak > 200 RFU    Upper Marker Selection: Last Peak > 200 RFU  
 Ladder Size (bp): 1, 75, 200, 300, 400, 500, 700, 1000, 1500, 2000, 3000, 4000, 5000, 7000, 10000, 20000  
 Quantification Using: Ladder    Final Concentration (ng/uL): 1.0417    Dilution Factor: 12.0  
 Size Threshold (b.p.): 10000



Data File: 2019 06 18 13H 16M.raw

Sample: 103613-001-049 (20x dil.)

Well Location: A7

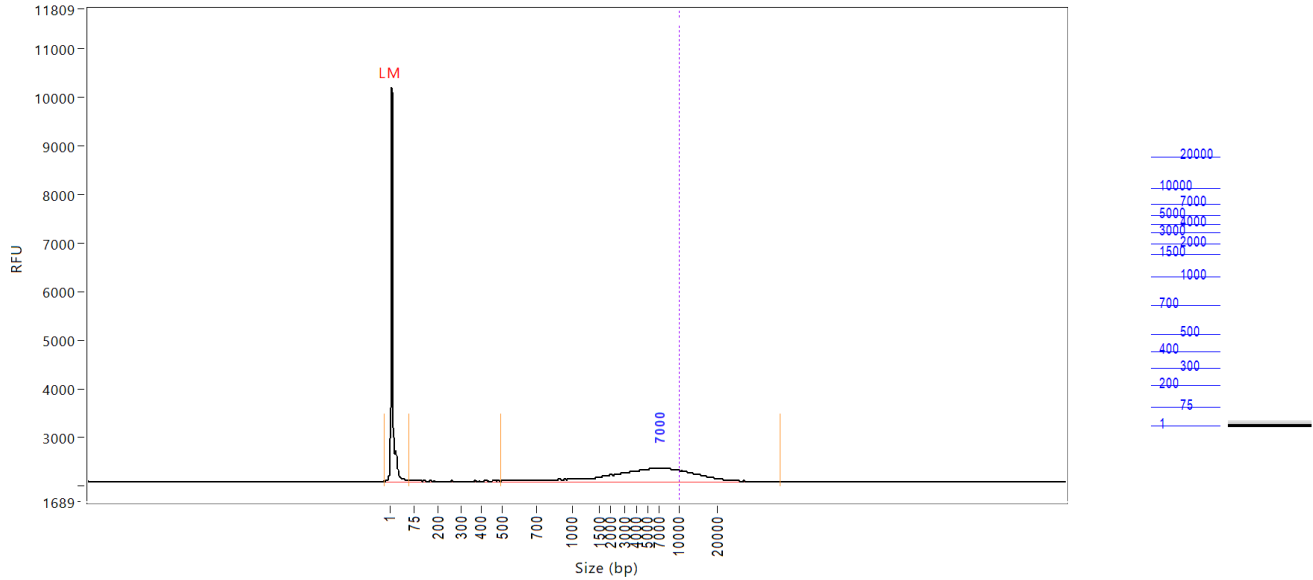

| Peak         | Size (bp) | Conc. (ng/uL) | From (bp) | To (bp) | Avg. Size (bp) | CV%    | RFU  | Corr. Peak Area |
|--------------|-----------|---------------|-----------|---------|----------------|--------|------|-----------------|
| 1            | 1 (LM)    | 0.0328        | 0         | 57      | 3              | 261.15 | 8084 | 57.246          |
| 2            | 7000      | 0.3474        | 492       | 36567   | 6479           | 81.68  | 261  | 50.522          |
| TIC:         |           | 0.3474        | ng/uL     |         |                |        |      |                 |
| TIM:         |           | 0.0883        | nmole/L   |         |                |        |      |                 |
| Total Conc.: |           | 0.3670        | ng/uL     |         |                |        |      |                 |
| GQN:         |           | 2.0           |           |         |                |        |      |                 |

Sample Peak Width (sec): 50    Sample Min Peak Height: 50    Sample Baseline V to V?: Y    Sample Baseline V to V pts: 3  
 Sample Filter: Binomial    # of Pts for Filter: 3    Sample Start Region (min): 0    Sample End Region (min): 50  
 Manual Baseline Start (min): 6    Manual Baseline End (min): 48  
 Marker Peak Width (sec): 5    Marker Min Peak Height: 200    Marker Baseline V to V?: Y    Marker Baseline V to V pts: 3  
 Lower Marker Selection: First Peak > 200 RFU    Upper Marker Selection: Last Peak > 200 RFU  
 Ladder Size (bp): 1, 75, 200, 300, 400, 500, 700, 1000, 1500, 2000, 3000, 4000, 5000, 7000, 10000, 20000  
 Quantification Using: Ladder    Final Concentration (ng/uL): 1.0417    Dilution Factor: 12.0  
 Size Threshold (b.p.): 10000

**Data File:** 2019 06 18 13H 16M.raw  
**Sample:** 103613-001-050 (20x dil.)  
**Well Location:** B7

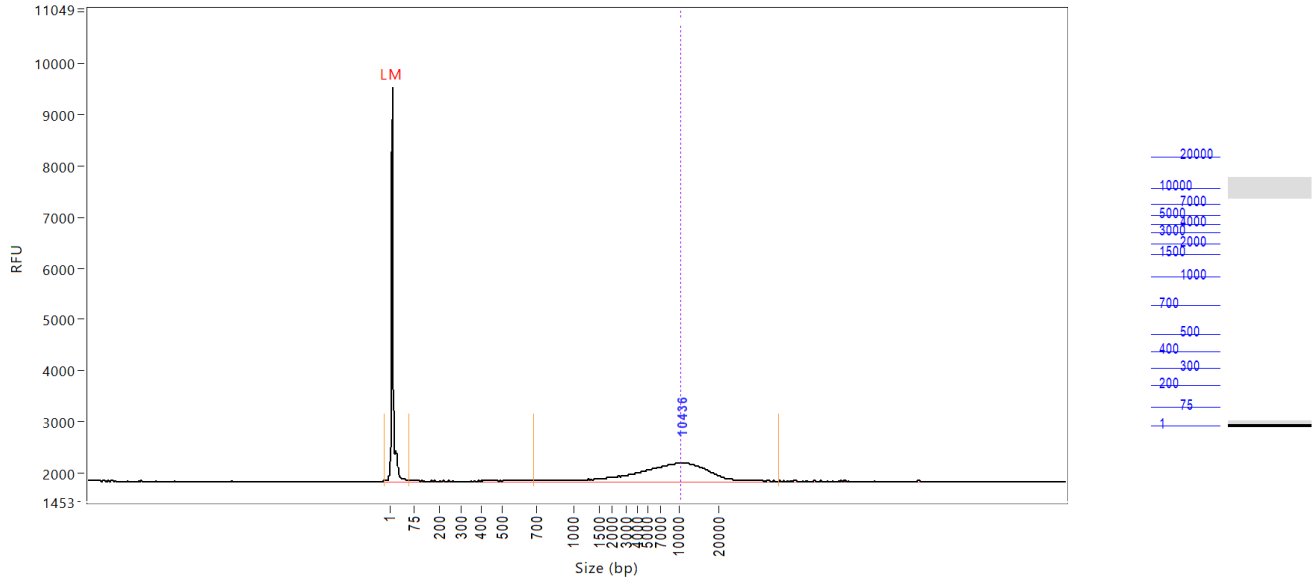

| Peak         | Size (bp) | Conc. (ng/uL) | From (bp) | To (bp) | Avg. Size (bp) | CV%    | RFU  | Corr. Peak Area |
|--------------|-----------|---------------|-----------|---------|----------------|--------|------|-----------------|
| 1            | 1 (LM)    | 0.0328        | 0         | 57      | 3              | 274.44 | 7663 | 53.430          |
| 2            | 10436     | 0.4405        | 679       | 35876   | 9239           | 67.15  | 367  | 59.796          |
| TIC:         |           | 0.4405        | ng/uL     |         |                |        |      |                 |
| TIM:         |           | 0.0785        | nmole/L   |         |                |        |      |                 |
| Total Conc.: |           | 0.5167        | ng/uL     |         |                |        |      |                 |
| GQN:         |           | 4.1           |           |         |                |        |      |                 |

Sample Peak Width (sec): 50    Sample Min Peak Height: 50    Sample Baseline V to V?: Y    Sample Baseline V to V pts: 3  
Sample Filter: Binomial    # of Pts for Filter: 3    Sample Start Region (min): 0    Sample End Region (min): 50  
Manual Baseline Start (min): 6    Manual Baseline End (min): 48  
Marker Peak Width (sec): 5    Marker Min Peak Height: 200    Marker Baseline V to V?: Y    Marker Baseline V to V pts: 3  
Lower Marker Selection: First Peak > 200 RFU    Upper Marker Selection: Last Peak > 200 RFU  
Ladder Size (bp): 1, 75, 200, 300, 400, 500, 700, 1000, 1500, 2000, 3000, 4000, 5000, 7000, 10000, 20000  
Quantification Using: Ladder    Final Concentration (ng/uL): 1.0417    Dilution Factor: 12.0  
Size Threshold (b.p.): 10000

**Data File:** 2019 06 18 13H 16M.raw  
**Sample:** 103613-001-051 (20x dil.)  
**Well Location:** C7

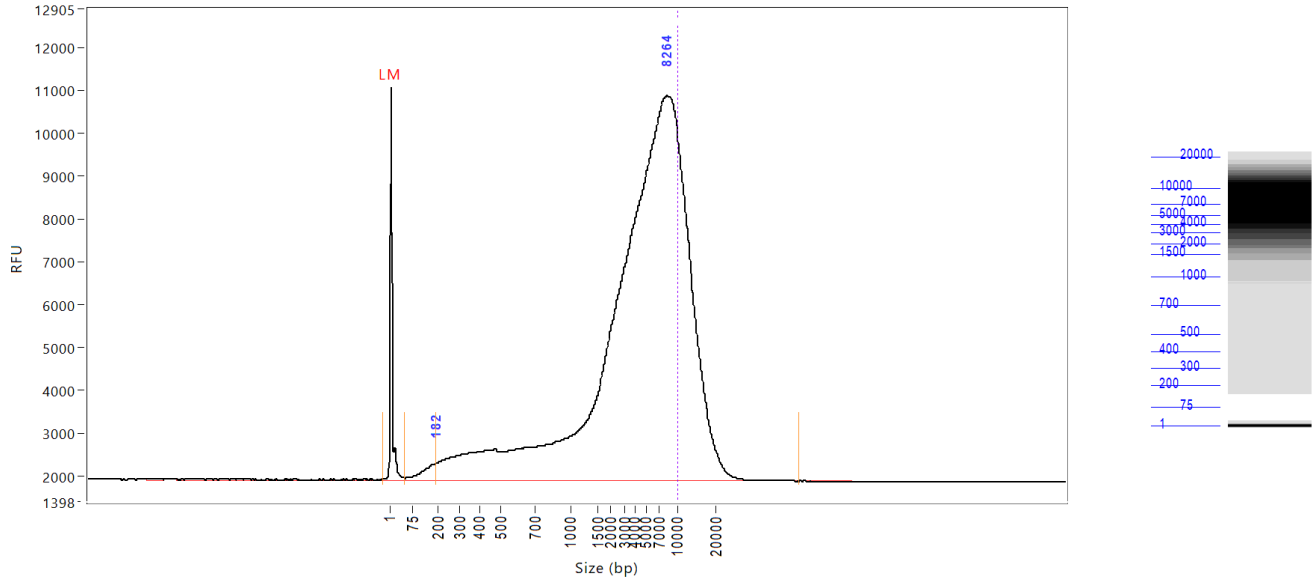

| Peak         | Size (bp) | Conc. (ng/uL) | From (bp) | To (bp) | Avg. Size (bp) | CV%    | RFU  | Corr. Peak Area |
|--------------|-----------|---------------|-----------|---------|----------------|--------|------|-----------------|
| 1            | 1 (LM)    | 0.0328        | 0         | 45      | 2              | 301.79 | 9159 | 63.777          |
| 2            | 182       | 0.1080        | 45        | 183     | 133            | 28.06  | 392  | 17.491          |
| 3            | 8264      | 9.2401        | 183       | 41571   | 5817           | 78.24  | 8986 | 1497.085        |
| TIC:         |           | 9.3481        | ng/uL     |         |                |        |      |                 |
| TIM:         |           | 3.9488        | nmole/L   |         |                |        |      |                 |
| Total Conc.: |           | 9.3473        | ng/uL     |         |                |        |      |                 |
| GQN:         |           | 1.7           |           |         |                |        |      |                 |

Sample Peak Width (sec): 50    Sample Min Peak Height: 50    Sample Baseline V to V?: Y    Sample Baseline V to V pts: 3  
Sample Filter: Binomial    # of Pts for Filter: 3    Sample Start Region (min): 0    Sample End Region (min): 50  
Manual Baseline Start (min): 6    Manual Baseline End (min): 48  
Marker Peak Width (sec): 5    Marker Min Peak Height: 200    Marker Baseline V to V?: Y    Marker Baseline V to V pts: 3  
Lower Marker Selection: First Peak > 200 RFU    Upper Marker Selection: Last Peak > 200 RFU  
Ladder Size (bp): 1, 75, 200, 300, 400, 500, 700, 1000, 1500, 2000, 3000, 4000, 5000, 7000, 10000, 20000  
Quantification Using: Ladder    Final Concentration (ng/uL): 1.0417    Dilution Factor: 12.0  
Size Threshold (b.p.): 10000

**Data File:** 2019 06 18 13H 16M.raw  
**Sample:** 103613-001-052 (20x dil.)  
**Well Location:** D7

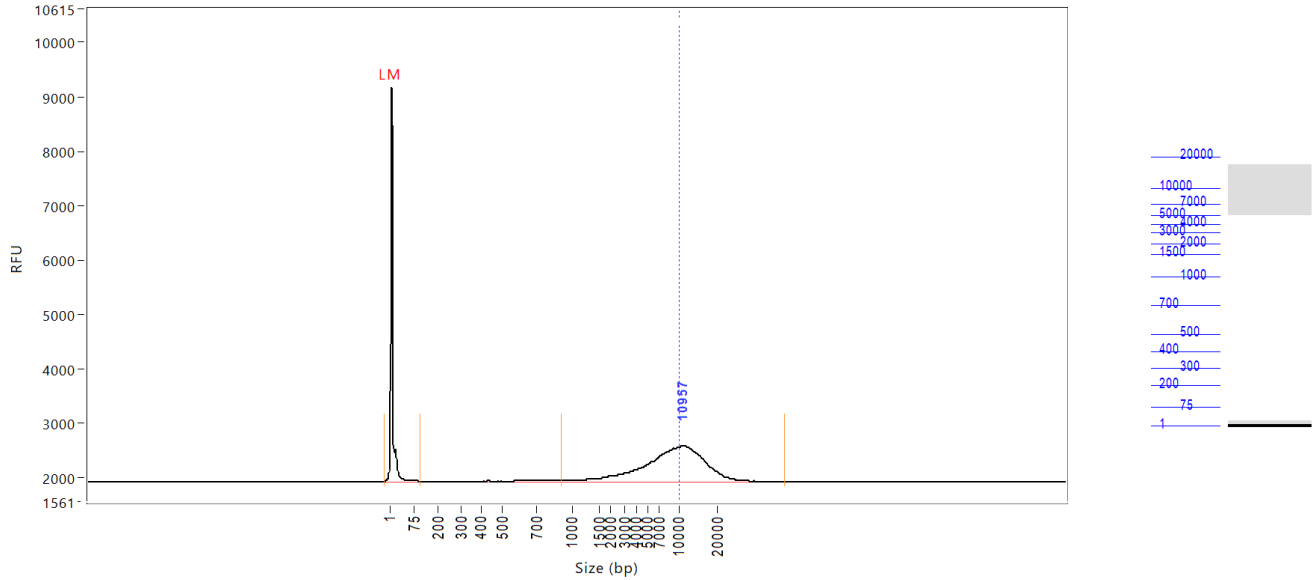

| Peak         | Size (bp) | Conc. (ng/uL) | From (bp) | To (bp) | Avg. Size (bp) | CV%    | RFU  | Corr. Peak Area |
|--------------|-----------|---------------|-----------|---------|----------------|--------|------|-----------------|
| 1            | 1 (LM)    | 0.0328        | 0         | 102     | 3              | 392.87 | 7238 | 52.168          |
| 2            | 10957     | 0.6769        | 902       | 37516   | 9670           | 57.10  | 656  | 89.713          |
| TIC:         |           | 0.6769        | ng/uL     |         |                |        |      |                 |
| TIM:         |           | 0.1152        | nmole/L   |         |                |        |      |                 |
| Total Conc.: |           | 0.7245        | ng/uL     |         |                |        |      |                 |
| GQN:         |           | 4.0           |           |         |                |        |      |                 |

Sample Peak Width (sec): 50    Sample Min Peak Height: 50    Sample Baseline V to V?: Y    Sample Baseline V to V pts: 3  
Sample Filter: Binomial    # of Pts for Filter: 3    Sample Start Region (min): 0    Sample End Region (min): 50  
Manual Baseline Start (min): 6    Manual Baseline End (min): 48  
Marker Peak Width (sec): 5    Marker Min Peak Height: 200    Marker Baseline V to V?: Y    Marker Baseline V to V pts: 3  
Lower Marker Selection: First Peak > 200 RFU    Upper Marker Selection: Last Peak > 200 RFU  
Ladder Size (bp): 1, 75, 200, 300, 400, 500, 700, 1000, 1500, 2000, 3000, 4000, 5000, 7000, 10000, 20000  
Quantification Using: Ladder    Final Concentration (ng/uL): 1.0417    Dilution Factor: 12.0  
Size Threshold (b.p.): 10000

**Data File:** 2019 06 18 13H 16M.raw  
**Sample:** 103613-001-053 (20x dil.)  
**Well Location:** E7

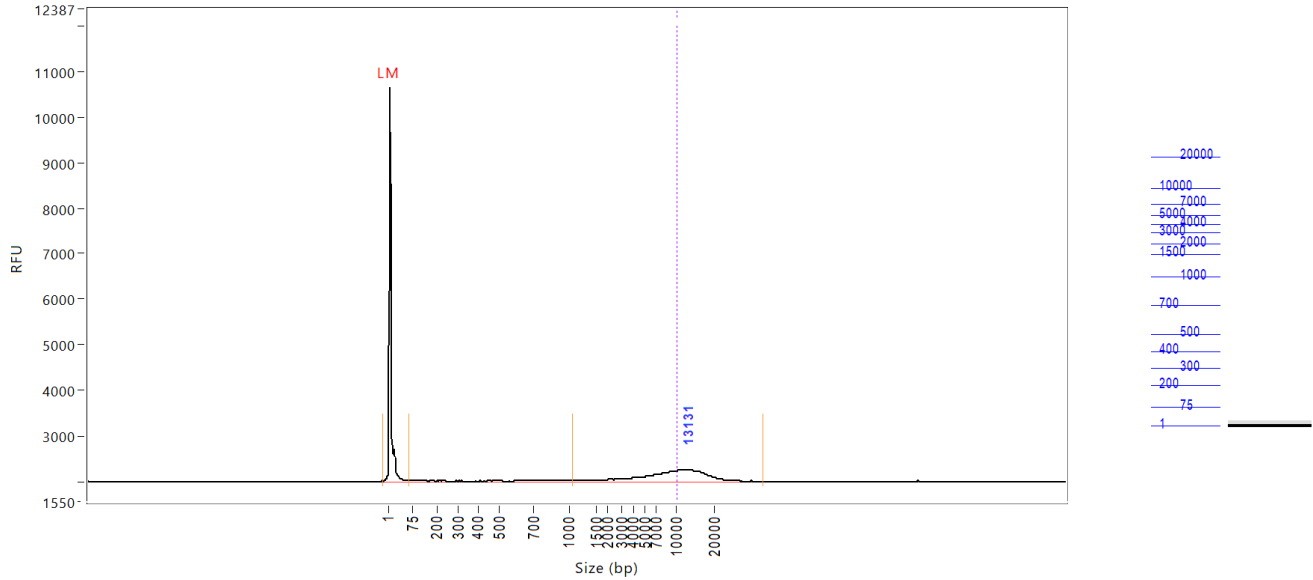

| Peak         | Size (bp) | Conc. (ng/uL) | From (bp) | To (bp) | Avg. Size (bp) | CV%    | RFU  | Corr. Peak Area |
|--------------|-----------|---------------|-----------|---------|----------------|--------|------|-----------------|
| 1            | 1 (LM)    | 0.0328        | 0         | 64      | 3              | 303.95 | 8653 | 60.176          |
| 2            | 13131     | 0.2364        | 1045      | 33115   | 10427          | 56.04  | 247  | 36.144          |
| TIC:         |           | 0.2364        | ng/uL     |         |                |        |      |                 |
| TIM:         |           | 0.0373        | nmole/L   |         |                |        |      |                 |
| Total Conc.: |           | 0.2938        | ng/uL     |         |                |        |      |                 |
| GQN:         |           | 4.5           |           |         |                |        |      |                 |

Sample Peak Width (sec): 50    Sample Min Peak Height: 50    Sample Baseline V to V?: Y    Sample Baseline V to V pts: 3  
Sample Filter: Binomial    # of Pts for Filter: 3    Sample Start Region (min): 0    Sample End Region (min): 50  
Manual Baseline Start (min): 6    Manual Baseline End (min): 48  
Marker Peak Width (sec): 5    Marker Min Peak Height: 200    Marker Baseline V to V?: Y    Marker Baseline V to V pts: 3  
Lower Marker Selection: First Peak > 200 RFU    Upper Marker Selection: Last Peak > 200 RFU  
Ladder Size (bp): 1, 75, 200, 300, 400, 500, 700, 1000, 1500, 2000, 3000, 4000, 5000, 7000, 10000, 20000  
Quantification Using: Ladder    Final Concentration (ng/uL): 1.0417    Dilution Factor: 12.0  
Size Threshold (b.p.): 10000

Data File: 2019 06 18 13H 16M.raw

Sample: 103613-001-054 (20x dil.)

Well Location: F7

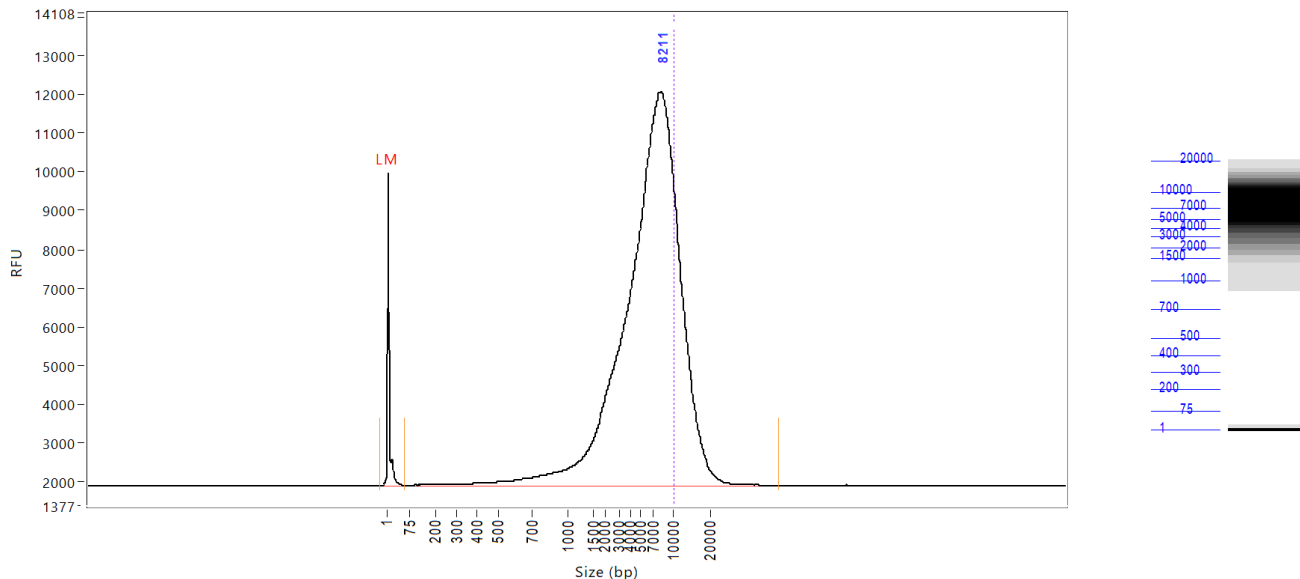

| Peak         | Size (bp) | Conc. (ng/uL) | From (bp) | To (bp) | Avg. Size (bp) | CV%    | RFU   | Corr. Peak Area |
|--------------|-----------|---------------|-----------|---------|----------------|--------|-------|-----------------|
| 1            | 1 (LM)    | 0.0328        | 0         | 56      | 2              | 340.52 | 8095  | 56.639          |
| 2            | 8211      | 8.0243        | 56        | 38206   | 6816           | 59.27  | 10174 | 1154.586        |
| TIC:         |           | 8.0243        | ng/uL     |         |                |        |       |                 |
| TIM:         |           | 1.9382        | nmole/L   |         |                |        |       |                 |
| Total Conc.: |           | 8.0393        | ng/uL     |         |                |        |       |                 |
| GQN:         |           | 1.8           |           |         |                |        |       |                 |

Sample Peak Width (sec): 50    Sample Min Peak Height: 50    Sample Baseline V to V?: Y    Sample Baseline V to V pts: 3  
 Sample Filter: Binomial    # of Pts for Filter: 3    Sample Start Region (min): 0    Sample End Region (min): 50  
 Manual Baseline Start (min): 6    Manual Baseline End (min): 48  
 Marker Peak Width (sec): 5    Marker Min Peak Height: 200    Marker Baseline V to V?: Y    Marker Baseline V to V pts: 3  
 Lower Marker Selection: First Peak > 200 RFU    Upper Marker Selection: Last Peak > 200 RFU  
 Ladder Size (bp): 1, 75, 200, 300, 400, 500, 700, 1000, 1500, 2000, 3000, 4000, 5000, 7000, 10000, 20000  
 Quantification Using: Ladder    Final Concentration (ng/uL): 1.0417    Dilution Factor: 12.0  
 Size Threshold (b.p.): 10000

Data File: 2019 06 18 13H 16M.raw

Sample: 103613-001-055 (20x dil.)

Well Location: G7

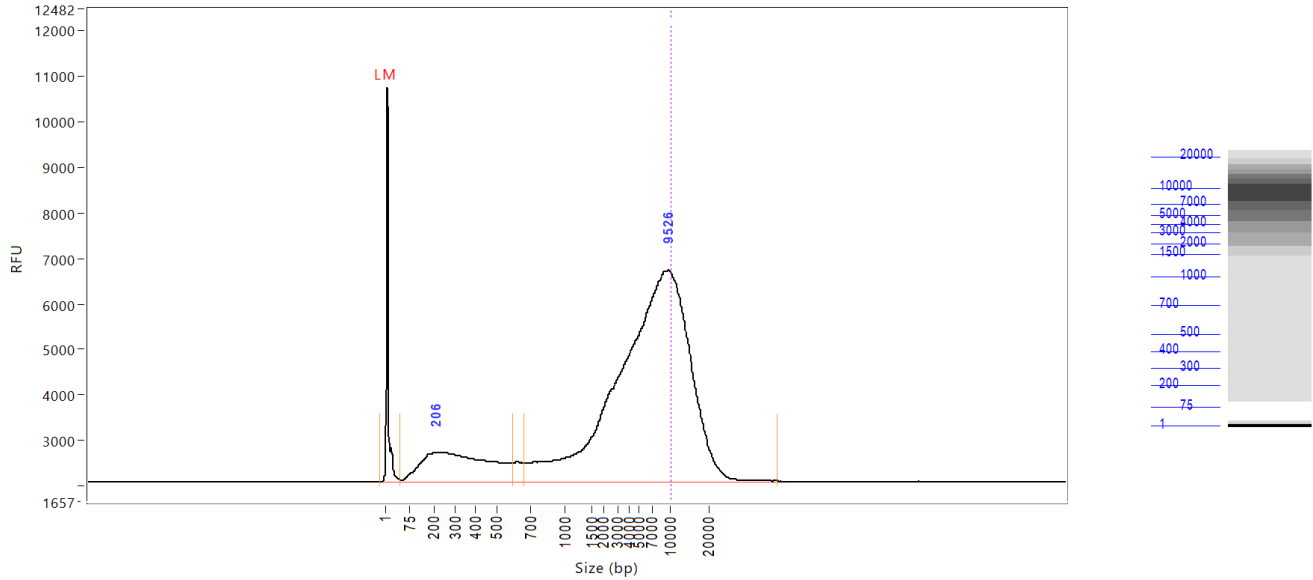

| Peak         | Size (bp) | Conc. (ng/uL) | From (bp) | To (bp) | Avg. Size (bp) | CV%    | RFU  | Corr. Peak Area |
|--------------|-----------|---------------|-----------|---------|----------------|--------|------|-----------------|
| 1            | 1 (LM)    | 0.0328        | 0         | 45      | 3              | 281.28 | 8652 | 60.785          |
| 2            | 206       | 0.8996        | 45        | 595     | 308            | 45.14  | 634  | 138.912         |
| 3            | 9526      | 4.8578        | 657       | 38120   | 7366           | 69.79  | 4642 | 750.131         |
| TIC:         |           | 5.7574        | ng/uL     |         |                |        |      |                 |
| TIM:         |           | 5.8902        | nmole/L   |         |                |        |      |                 |
| Total Conc.: |           | 5.8487        | ng/uL     |         |                |        |      |                 |
| GQN:         |           | 2.3           |           |         |                |        |      |                 |

Sample Peak Width (sec): 50    Sample Min Peak Height: 50    Sample Baseline V to V?: Y    Sample Baseline V to V pts: 3  
 Sample Filter: Binomial    # of Pts for Filter: 3    Sample Start Region (min): 0    Sample End Region (min): 50  
 Manual Baseline Start (min): 6    Manual Baseline End (min): 48  
 Marker Peak Width (sec): 5    Marker Min Peak Height: 200    Marker Baseline V to V?: Y    Marker Baseline V to V pts: 3  
 Lower Marker Selection: First Peak > 200 RFU    Upper Marker Selection: Last Peak > 200 RFU  
 Ladder Size (bp): 1, 75, 200, 300, 400, 500, 700, 1000, 1500, 2000, 3000, 4000, 5000, 7000, 10000, 20000  
 Quantification Using: Ladder    Final Concentration (ng/uL): 1.0417    Dilution Factor: 12.0  
 Size Threshold (b.p.): 10000

**Data File:** 2019 06 18 13H 16M.raw  
**Sample:** 103613-001-056 (20x dil.)  
**Well Location:** H7

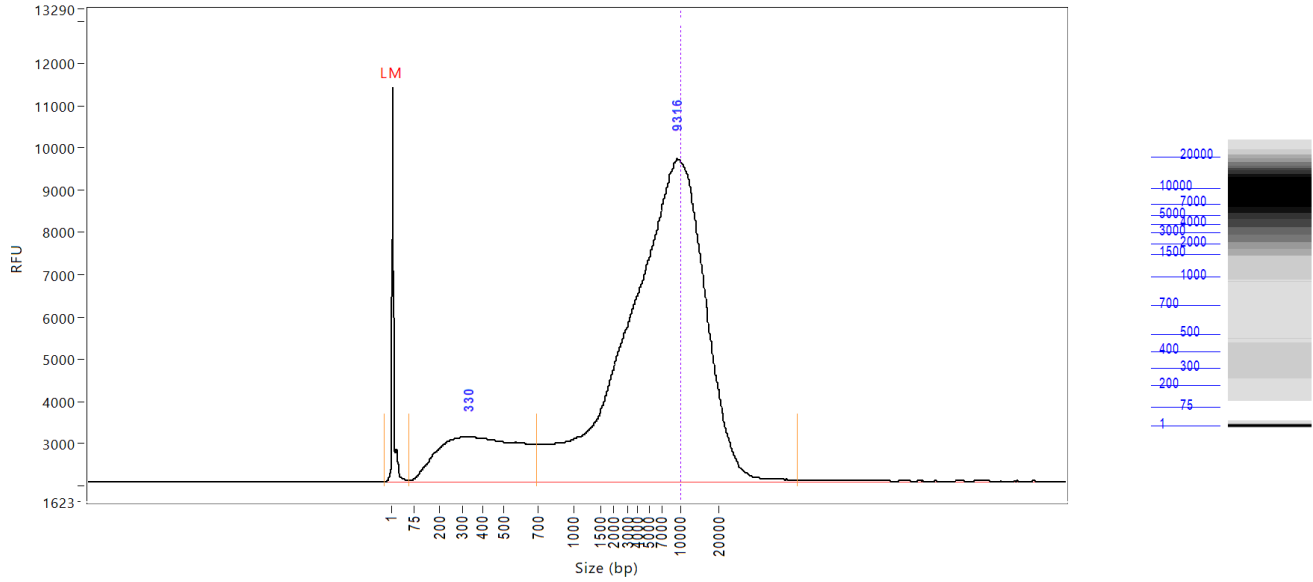

| Peak         | Size (bp) | Conc. (ng/uL) | From (bp) | To (bp) | Avg. Size (bp) | CV%    | RFU  | Corr. Peak Area |
|--------------|-----------|---------------|-----------|---------|----------------|--------|------|-----------------|
| 1            | 1 (LM)    | 0.0328        | 0         | 52      | 2              | 381.72 | 9325 | 66.014          |
| 2            | 330       | 1.5903        | 52        | 688     | 380            | 41.54  | 1044 | 266.704         |
| 3            | 9316      | 7.9449        | 688       | 40191   | 7851           | 72.04  | 7640 | 1332.394        |
| TIC:         |           | 9.5352        | ng/uL     |         |                |        |      |                 |
| TIM:         |           | 8.5514        | nmole/L   |         |                |        |      |                 |
| Total Conc.: |           | 9.5807        | ng/uL     |         |                |        |      |                 |
| GQN:         |           | 2.5           |           |         |                |        |      |                 |

Sample Peak Width (sec): 50    Sample Min Peak Height: 50    Sample Baseline V to V?: Y    Sample Baseline V to V pts: 3  
Sample Filter: Binomial    # of Pts for Filter: 3    Sample Start Region (min): 0    Sample End Region (min): 50  
Manual Baseline Start (min): 6    Manual Baseline End (min): 48  
Marker Peak Width (sec): 5    Marker Min Peak Height: 200    Marker Baseline V to V?: Y    Marker Baseline V to V pts: 3  
Lower Marker Selection: First Peak > 200 RFU    Upper Marker Selection: Last Peak > 200 RFU  
Ladder Size (bp): 1, 75, 200, 300, 400, 500, 700, 1000, 1500, 2000, 3000, 4000, 5000, 7000, 10000, 20000  
Quantification Using: Ladder    Final Concentration (ng/uL): 1.0417    Dilution Factor: 12.0  
Size Threshold (b.p.): 10000



Data File: 2019 06 18 13H 16M.raw

Sample: 103613-001-057 (20x dil.)

Well Location: A8

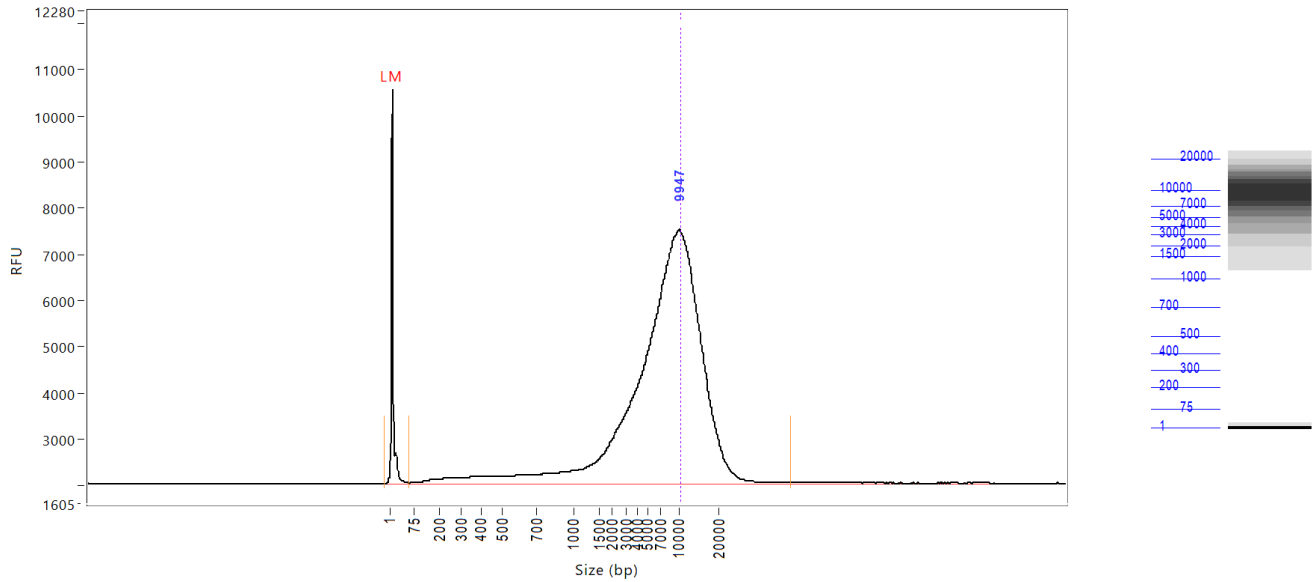

| Peak         | Size (bp) | Conc. (ng/uL) | From (bp) | To (bp) | Avg. Size (bp) | CV%    | RFU  | Corr. Peak Area |
|--------------|-----------|---------------|-----------|---------|----------------|--------|------|-----------------|
| 1            | 1 (LM)    | 0.0328        | 0         | 54      | 2              | 296.17 | 8530 | 58.585          |
| 2            | 9947      | 5.0735        | 54        | 38810   | 8187           | 64.92  | 5494 | 755.082         |
| TIC:         |           | 5.0735        | ng/uL     |         |                |        |      |                 |
| TIM:         |           | 1.0202        | nmole/L   |         |                |        |      |                 |
| Total Conc.: |           | 5.0992        | ng/uL     |         |                |        |      |                 |
| GQN:         |           | 3.4           |           |         |                |        |      |                 |

Sample Peak Width (sec): 50    Sample Min Peak Height: 50    Sample Baseline V to V?: Y    Sample Baseline V to V pts: 3  
 Sample Filter: Binomial    # of Pts for Filter: 3    Sample Start Region (min): 0    Sample End Region (min): 50  
 Manual Baseline Start (min): 6    Manual Baseline End (min): 48  
 Marker Peak Width (sec): 5    Marker Min Peak Height: 200    Marker Baseline V to V?: Y    Marker Baseline V to V pts: 3  
 Lower Marker Selection: First Peak > 200 RFU    Upper Marker Selection: Last Peak > 200 RFU  
 Ladder Size (bp): 1, 75, 200, 300, 400, 500, 700, 1000, 1500, 2000, 3000, 4000, 5000, 7000, 10000, 20000  
 Quantification Using: Ladder    Final Concentration (ng/uL): 1.0417    Dilution Factor: 12.0  
 Size Threshold (b.p.): 10000

Data File: 2019 06 18 13H 16M.raw

Sample: 103613-001-058 (20x dil.)

Well Location: B8

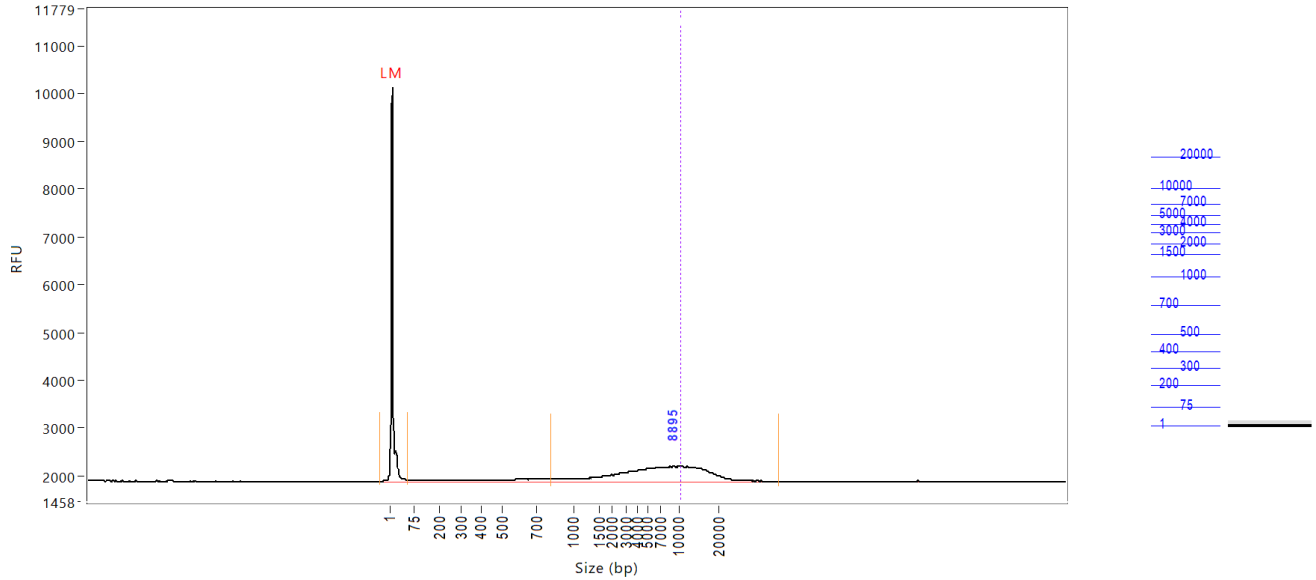

| Peak         | Size (bp) | Conc. (ng/uL) | From (bp) | To (bp) | Avg. Size (bp) | CV%    | RFU  | Corr. Peak Area |
|--------------|-----------|---------------|-----------|---------|----------------|--------|------|-----------------|
| 1            | 1 (LM)    | 0.0328        | 0         | 53      | 2              | 360.04 | 8238 | 57.529          |
| 2            | 8895      | 0.4232        | 810       | 36049   | 8142           | 72.10  | 312  | 61.850          |
| TIC:         |           | 0.4232        | ng/uL     |         |                |        |      |                 |
| TIM:         |           | 0.0856        | nmole/L   |         |                |        |      |                 |
| Total Conc.: |           | 0.4956        | ng/uL     |         |                |        |      |                 |
| GQN:         |           | 2.8           |           |         |                |        |      |                 |

Sample Peak Width (sec): 50    Sample Min Peak Height: 50    Sample Baseline V to V?: Y    Sample Baseline V to V pts: 3  
 Sample Filter: Binomial    # of Pts for Filter: 3    Sample Start Region (min): 0    Sample End Region (min): 50  
 Manual Baseline Start (min): 6    Manual Baseline End (min): 48  
 Marker Peak Width (sec): 5    Marker Min Peak Height: 200    Marker Baseline V to V?: Y    Marker Baseline V to V pts: 3  
 Lower Marker Selection: First Peak > 200 RFU    Upper Marker Selection: Last Peak > 200 RFU  
 Ladder Size (bp): 1, 75, 200, 300, 400, 500, 700, 1000, 1500, 2000, 3000, 4000, 5000, 7000, 10000, 20000  
 Quantification Using: Ladder    Final Concentration (ng/uL): 1.0417    Dilution Factor: 12.0  
 Size Threshold (b.p.): 10000

**Data File:** 2019 06 18 13H 16M.raw  
**Sample:** 103613-001-059 (20x dil.)  
**Well Location:** C8

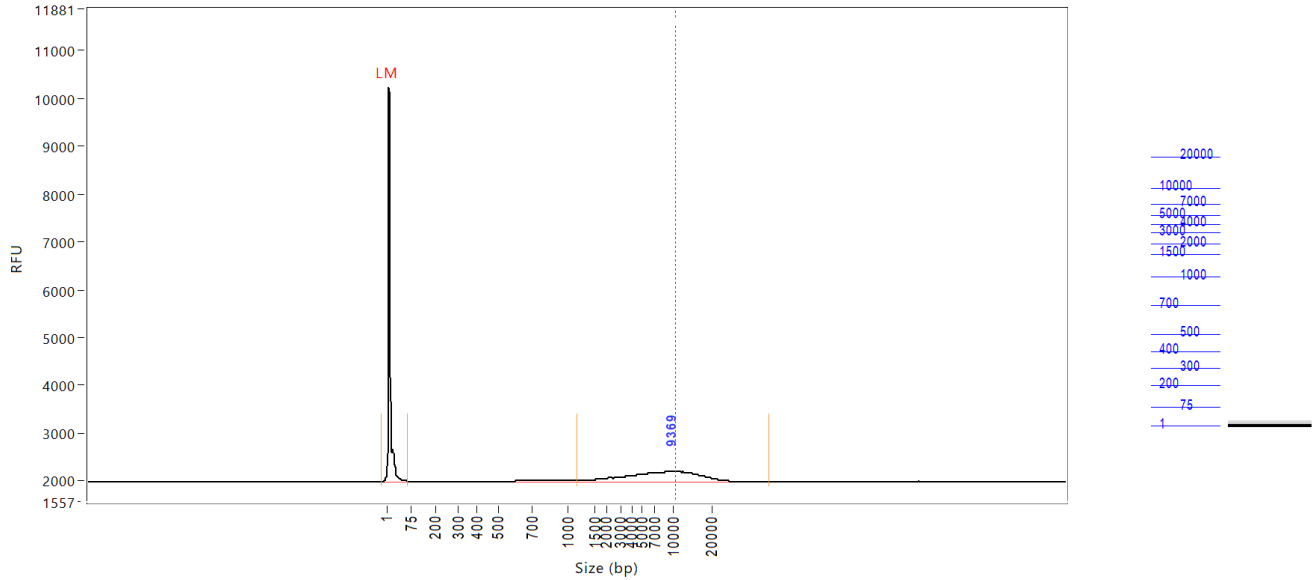

| Peak         | Size (bp) | Conc. (ng/uL) | From (bp) | To (bp) | Avg. Size (bp) | CV%    | RFU  | Corr. Peak Area |
|--------------|-----------|---------------|-----------|---------|----------------|--------|------|-----------------|
| 1            | 1 (LM)    | 0.0328        | 0         | 60      | 3              | 255.52 | 8252 | 58.864          |
| 2            | 9369      | 0.2326        | 1144      | 34927   | 8678           | 63.06  | 207  | 34.782          |
| TIC:         |           | 0.2326        | ng/uL     |         |                |        |      |                 |
| TIM:         |           | 0.0441        | nmole/L   |         |                |        |      |                 |
| Total Conc.: |           | 0.2641        | ng/uL     |         |                |        |      |                 |
| GQN:         |           | 3.1           |           |         |                |        |      |                 |

Sample Peak Width (sec): 50    Sample Min Peak Height: 50    Sample Baseline V to V?: Y    Sample Baseline V to V pts: 3  
Sample Filter: Binomial    # of Pts for Filter: 3    Sample Start Region (min): 0    Sample End Region (min): 50  
Manual Baseline Start (min): 6    Manual Baseline End (min): 48  
Marker Peak Width (sec): 5    Marker Min Peak Height: 200    Marker Baseline V to V?: Y    Marker Baseline V to V pts: 3  
Lower Marker Selection: First Peak > 200 RFU    Upper Marker Selection: Last Peak > 200 RFU  
Ladder Size (bp): 1, 75, 200, 300, 400, 500, 700, 1000, 1500, 2000, 3000, 4000, 5000, 7000, 10000, 20000  
Quantification Using: Ladder    Final Concentration (ng/uL): 1.0417    Dilution Factor: 12.0  
Size Threshold (b.p.): 10000

**Data File:** 2019 06 18 13H 16M.raw  
**Sample:** 103613-001-060 (20x dil.)  
**Well Location:** D8

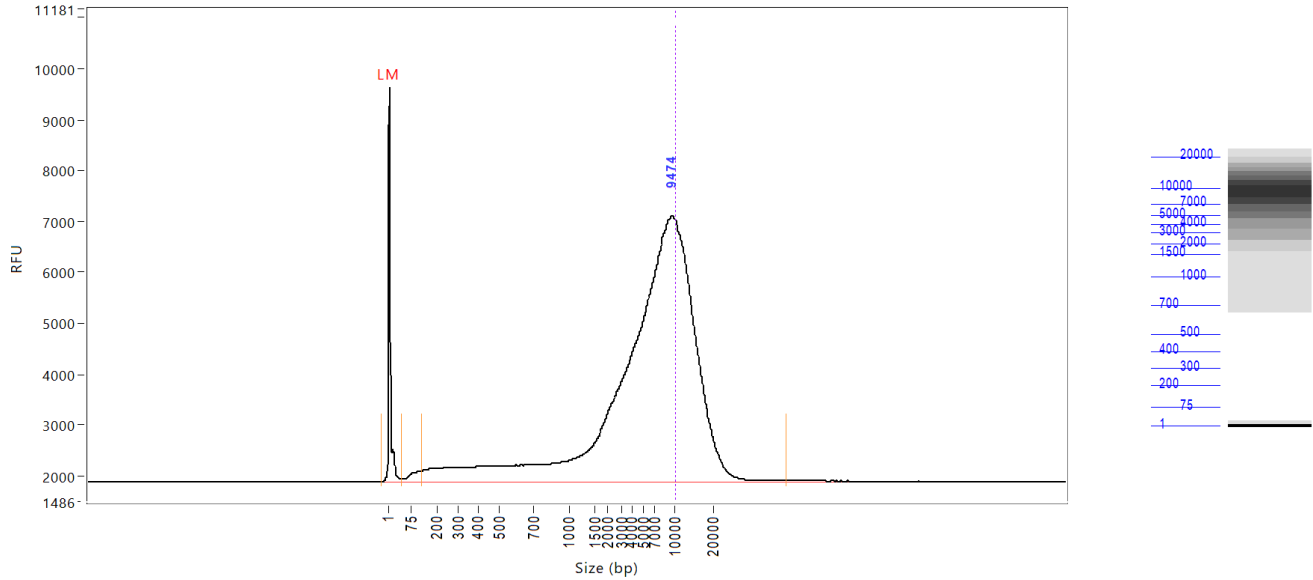

| Peak         | Size (bp) | Conc. (ng/uL) | From (bp) | To (bp) | Avg. Size (bp) | CV%    | RFU  | Corr. Peak Area |
|--------------|-----------|---------------|-----------|---------|----------------|--------|------|-----------------|
| 1            | 1 (LM)    | 0.0328        | 0         | 43      | 2              | 303.18 | 7748 | 53.663          |
| 2            | 9474      | 6.1033        | 122       | 39155   | 7179           | 75.19  | 5231 | 832.046         |
| TIC:         |           | 6.1033        | ng/uL     |         |                |        |      |                 |
| TIM:         |           | 1.3996        | nmole/L   |         |                |        |      |                 |
| Total Conc.: |           | 6.1841        | ng/uL     |         |                |        |      |                 |
| GQN:         |           | 2.7           |           |         |                |        |      |                 |

Sample Peak Width (sec): 50    Sample Min Peak Height: 50    Sample Baseline V to V?: Y    Sample Baseline V to V pts: 3  
Sample Filter: Binomial    # of Pts for Filter: 3    Sample Start Region (min): 0    Sample End Region (min): 50  
Manual Baseline Start (min): 6    Manual Baseline End (min): 48  
Marker Peak Width (sec): 5    Marker Min Peak Height: 200    Marker Baseline V to V?: Y    Marker Baseline V to V pts: 3  
Lower Marker Selection: First Peak > 200 RFU    Upper Marker Selection: Last Peak > 200 RFU  
Ladder Size (bp): 1, 75, 200, 300, 400, 500, 700, 1000, 1500, 2000, 3000, 4000, 5000, 7000, 10000, 20000  
Quantification Using: Ladder    Final Concentration (ng/uL): 1.0417    Dilution Factor: 12.0  
Size Threshold (b.p.): 10000

Data File: 2019 06 18 13H 16M.raw

Sample: 103613-001-061 (20x dil.)

Well Location: E8

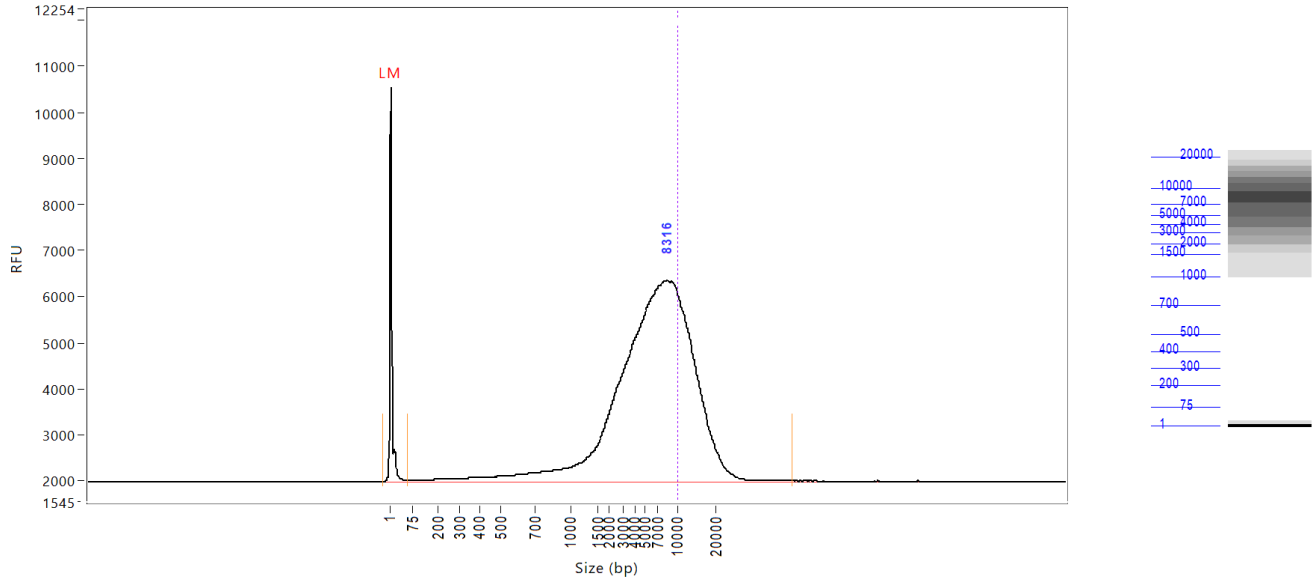

| Peak         | Size (bp) | Conc. (ng/uL) | From (bp) | To (bp) | Avg. Size (bp) | CV%    | RFU  | Corr. Peak Area |
|--------------|-----------|---------------|-----------|---------|----------------|--------|------|-----------------|
| 1            | 1 (LM)    | 0.0328        | 0         | 53      | 2              | 295.07 | 8561 | 59.499          |
| 2            | 8316      | 4.8282        | 53        | 39932   | 7150           | 71.71  | 4364 | 729.801         |
| TIC:         |           | 4.8282        | ng/uL     |         |                |        |      |                 |
| TIM:         |           | 1.1117        | nmole/L   |         |                |        |      |                 |
| Total Conc.: |           | 4.8671        | ng/uL     |         |                |        |      |                 |
| GQN:         |           | 2.5           |           |         |                |        |      |                 |

Sample Peak Width (sec): 50    Sample Min Peak Height: 50    Sample Baseline V to V?: Y    Sample Baseline V to V pts: 3  
 Sample Filter: Binomial    # of Pts for Filter: 3    Sample Start Region (min): 0    Sample End Region (min): 50  
 Manual Baseline Start (min): 6    Manual Baseline End (min): 48  
 Marker Peak Width (sec): 5    Marker Min Peak Height: 200    Marker Baseline V to V?: Y    Marker Baseline V to V pts: 3  
 Lower Marker Selection: First Peak > 200 RFU    Upper Marker Selection: Last Peak > 200 RFU  
 Ladder Size (bp): 1, 75, 200, 300, 400, 500, 700, 1000, 1500, 2000, 3000, 4000, 5000, 7000, 10000, 20000  
 Quantification Using: Ladder    Final Concentration (ng/uL): 1.0417    Dilution Factor: 12.0  
 Size Threshold (b.p.): 10000

Data File: 2019 06 18 13H 16M.raw

Sample: 103613-001-062 (20x dil.)

Well Location: F8

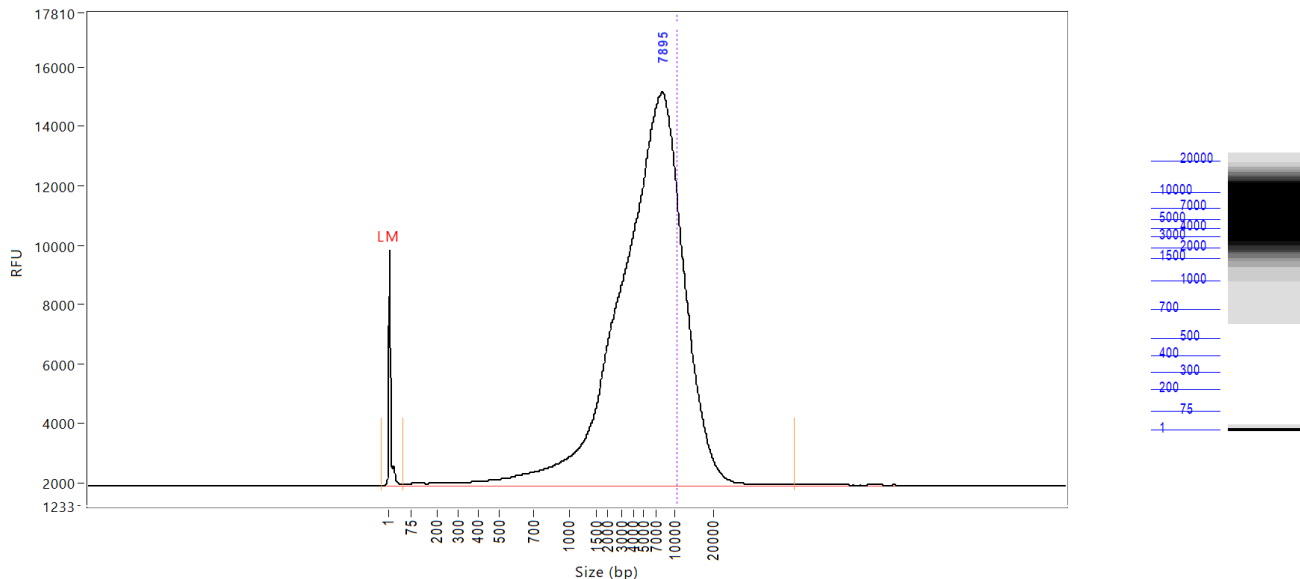

| Peak         | Size (bp) | Conc. (ng/uL) | From (bp) | To (bp) | Avg. Size (bp) | CV%    | RFU   | Corr. Peak Area |
|--------------|-----------|---------------|-----------|---------|----------------|--------|-------|-----------------|
| 1            | 1 (LM)    | 0.0328        | 0         | 46      | 2              | 328.22 | 7952  | 55.401          |
| 2            | 7895      | 12.9344       | 46        | 41312   | 6404           | 69.12  | 13247 | 1820.399        |
| TIC:         |           | 12.9344       | ng/uL     |         |                |        |       |                 |
| TIM:         |           | 3.3251        | nmole/L   |         |                |        |       |                 |
| Total Conc.: |           | 12.9809       | ng/uL     |         |                |        |       |                 |
| GQN:         |           | 1.8           |           |         |                |        |       |                 |

Sample Peak Width (sec): 50    Sample Min Peak Height: 50    Sample Baseline V to V?: Y    Sample Baseline V to V pts: 3  
 Sample Filter: Binomial    # of Pts for Filter: 3    Sample Start Region (min): 0    Sample End Region (min): 50  
 Manual Baseline Start (min): 6    Manual Baseline End (min): 48  
 Marker Peak Width (sec): 5    Marker Min Peak Height: 200    Marker Baseline V to V?: Y    Marker Baseline V to V pts: 3  
 Lower Marker Selection: First Peak > 200 RFU    Upper Marker Selection: Last Peak > 200 RFU  
 Ladder Size (bp): 1, 75, 200, 300, 400, 500, 700, 1000, 1500, 2000, 3000, 4000, 5000, 7000, 10000, 20000  
 Quantification Using: Ladder    Final Concentration (ng/uL): 1.0417    Dilution Factor: 12.0  
 Size Threshold (b.p.): 10000

**Data File:** 2019 06 18 13H 16M.raw  
**Sample:** 103613-001-063 (20x dil.)  
**Well Location:** G8

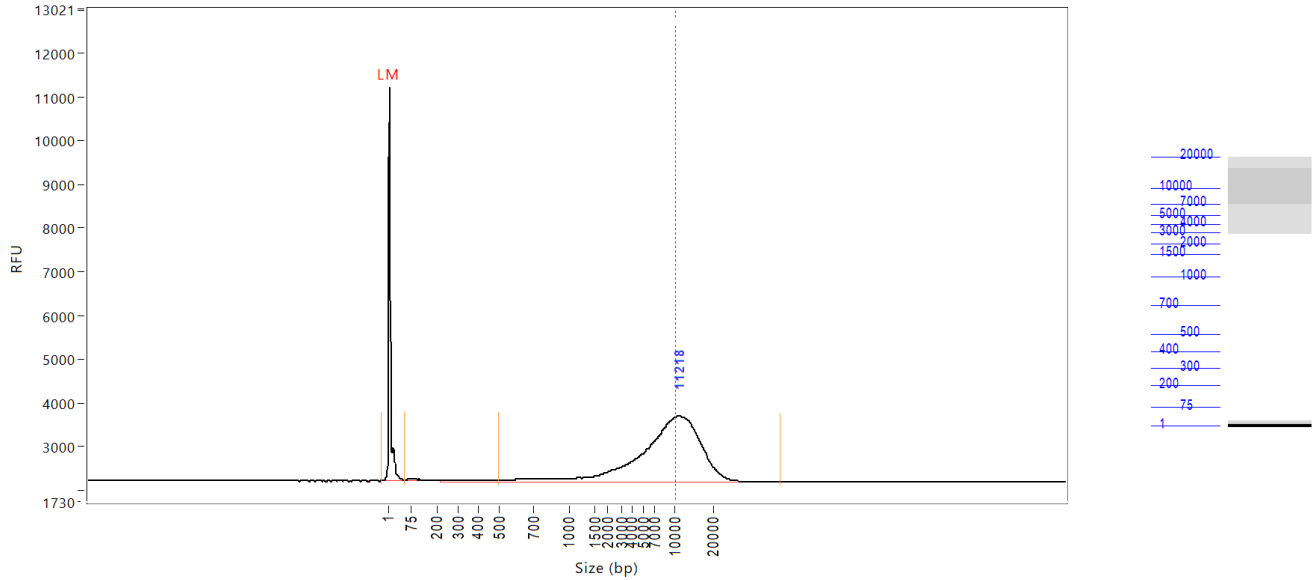

| Peak         | Size (bp) | Conc. (ng/uL) | From (bp) | To (bp) | Avg. Size (bp) | CV%    | RFU  | Corr. Peak Area |
|--------------|-----------|---------------|-----------|---------|----------------|--------|------|-----------------|
| 1            | 1 (LM)    | 0.0328        | 0         | 53      | 3              | 264.71 | 9009 | 64.040          |
| 2            | 11218     | 1.2195        | 495       | 37688   | 9360           | 55.46  | 1506 | 198.396         |
| TIC:         |           | 1.2195        | ng/uL     |         |                |        |      |                 |
| TIM:         |           | 0.2145        | nmole/L   |         |                |        |      |                 |
| Total Conc.: |           | 1.2608        | ng/uL     |         |                |        |      |                 |
| GQN:         |           | 4.1           |           |         |                |        |      |                 |

Sample Peak Width (sec): 50    Sample Min Peak Height: 50    Sample Baseline V to V?: Y    Sample Baseline V to V pts: 3  
Sample Filter: Binomial    # of Pts for Filter: 3    Sample Start Region (min): 0    Sample End Region (min): 50  
Manual Baseline Start (min): 6    Manual Baseline End (min): 48  
Marker Peak Width (sec): 5    Marker Min Peak Height: 200    Marker Baseline V to V?: Y    Marker Baseline V to V pts: 3  
Lower Marker Selection: First Peak > 200 RFU    Upper Marker Selection: Last Peak > 200 RFU  
Ladder Size (bp): 1, 75, 200, 300, 400, 500, 700, 1000, 1500, 2000, 3000, 4000, 5000, 7000, 10000, 20000  
Quantification Using: Ladder    Final Concentration (ng/uL): 1.0417    Dilution Factor: 12.0  
Size Threshold (b.p.): 10000

**Data File:** 2019 06 18 13H 16M.raw  
**Sample:** 103613-001-064 (20x dil.)  
**Well Location:** H8

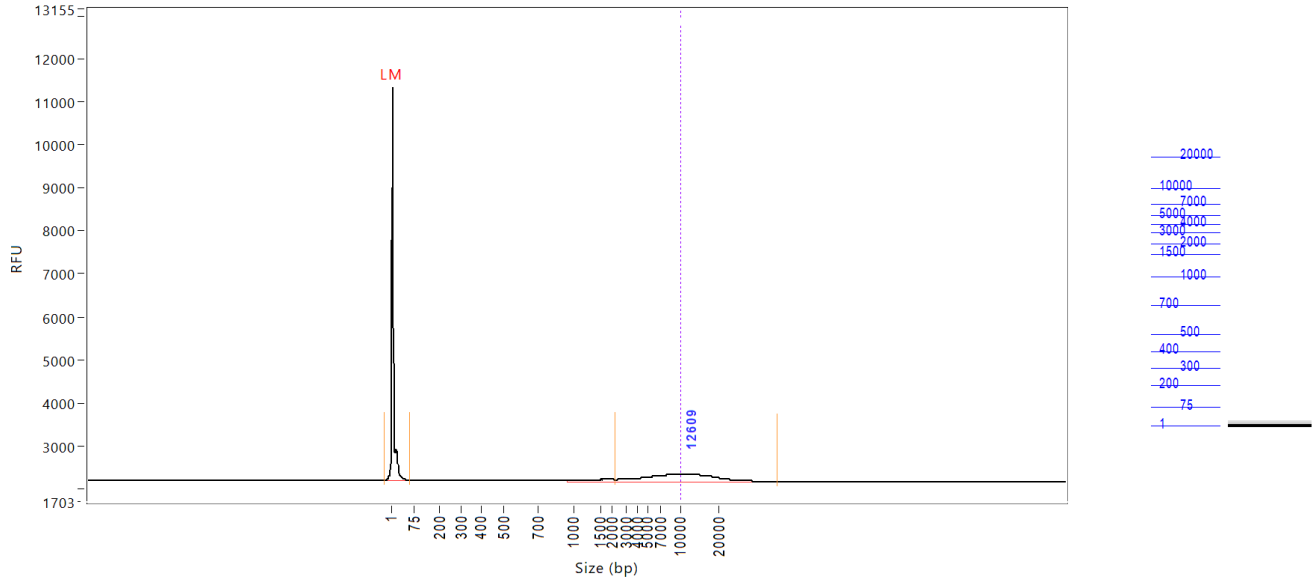

| Peak         | Size (bp) | Conc. (ng/uL) | From (bp) | To (bp) | Avg. Size (bp) | CV%    | RFU  | Corr. Peak Area |
|--------------|-----------|---------------|-----------|---------|----------------|--------|------|-----------------|
| 1            | 1 (LM)    | 0.0328        | 0         | 58      | 2              | 300.49 | 9132 | 63.645          |
| 2            | 12609     | 0.1563        | 2168      | 35359   | 10838          | 53.22  | 151  | 25.267          |
| TIC:         |           | 0.1563        | ng/uL     |         |                |        |      |                 |
| TIM:         |           | 0.0237        | nmole/L   |         |                |        |      |                 |
| Total Conc.: |           | 0.2017        | ng/uL     |         |                |        |      |                 |
| GQN:         |           | 3.8           |           |         |                |        |      |                 |

Sample Peak Width (sec): 50    Sample Min Peak Height: 50    Sample Baseline V to V?: Y    Sample Baseline V to V pts: 3  
Sample Filter: Binomial    # of Pts for Filter: 3    Sample Start Region (min): 0    Sample End Region (min): 50  
Manual Baseline Start (min): 6    Manual Baseline End (min): 48  
Marker Peak Width (sec): 5    Marker Min Peak Height: 200    Marker Baseline V to V?: Y    Marker Baseline V to V pts: 3  
Lower Marker Selection: First Peak > 200 RFU    Upper Marker Selection: Last Peak > 200 RFU  
Ladder Size (bp): 1, 75, 200, 300, 400, 500, 700, 1000, 1500, 2000, 3000, 4000, 5000, 7000, 10000, 20000  
Quantification Using: Ladder    Final Concentration (ng/uL): 1.0417    Dilution Factor: 12.0  
Size Threshold (b.p.): 10000



**Data File:** 2019 06 18 13H 16M.raw  
**Sample:** 103613-001-065 (20x dil.)  
**Well Location:** A9

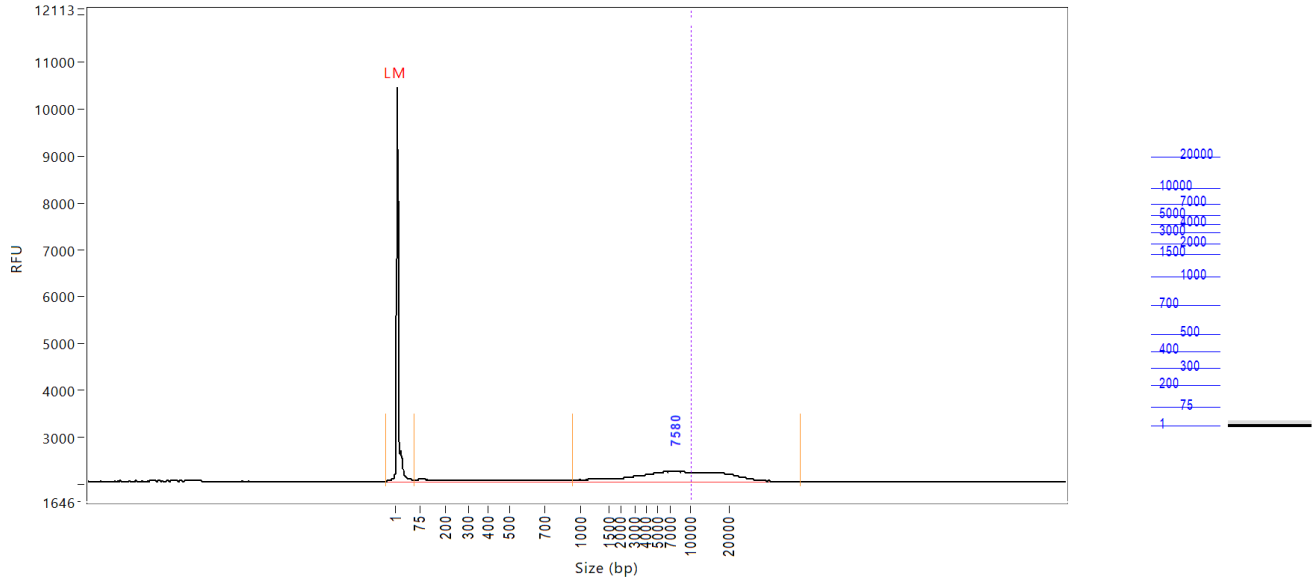

| Peak         | Size (bp) | Conc. (ng/uL) | From (bp) | To (bp) | Avg. Size (bp) | CV%    | RFU  | Corr. Peak Area |
|--------------|-----------|---------------|-----------|---------|----------------|--------|------|-----------------|
| 1            | 1 (LM)    | 0.0328        | 0         | 56      | 2              | 397.20 | 8360 | 58.688          |
| 2            | 7580      | 0.3220        | 927       | 38206   | 9759           | 72.17  | 203  | 48.007          |
| TIC:         |           | 0.3220        | ng/uL     |         |                |        |      |                 |
| TIM:         |           | 0.0543        | nmole/L   |         |                |        |      |                 |
| Total Conc.: |           | 0.3952        | ng/uL     |         |                |        |      |                 |
| GQN:         |           | 3.1           |           |         |                |        |      |                 |

Sample Peak Width (sec): 50    Sample Min Peak Height: 50    Sample Baseline V to V?: Y    Sample Baseline V to V pts: 3  
Sample Filter: Binomial    # of Pts for Filter: 3    Sample Start Region (min): 0    Sample End Region (min): 50  
Manual Baseline Start (min): 6    Manual Baseline End (min): 48  
Marker Peak Width (sec): 5    Marker Min Peak Height: 200    Marker Baseline V to V?: Y    Marker Baseline V to V pts: 3  
Lower Marker Selection: First Peak > 200 RFU    Upper Marker Selection: Last Peak > 200 RFU  
Ladder Size (bp): 1, 75, 200, 300, 400, 500, 700, 1000, 1500, 2000, 3000, 4000, 5000, 7000, 10000, 20000  
Quantification Using: Ladder    Final Concentration (ng/uL): 1.0417    Dilution Factor: 12.0  
Size Threshold (b.p.): 10000

Data File: 2019 06 18 13H 16M.raw

Sample: 103613-001-066 (20x dil.)

Well Location: B9

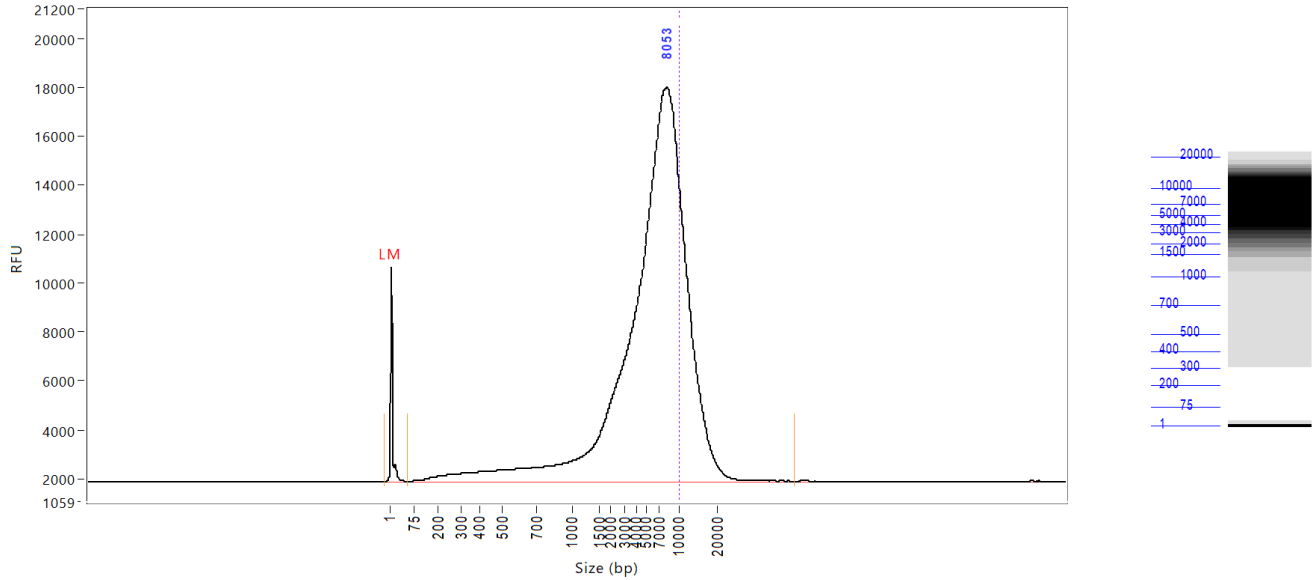

| Peak         | Size (bp) | Conc. (ng/uL) | From (bp) | To (bp) | Avg. Size (bp) | CV%    | RFU   | Corr. Peak Area |
|--------------|-----------|---------------|-----------|---------|----------------|--------|-------|-----------------|
| 1            | 1 (LM)    | 0.0328        | 0         | 55      | 2              | 316.35 | 8748  | 60.227          |
| 2            | 8053      | 12.1277       | 55        | 40450   | 6641           | 64.10  | 16094 | 1855.558        |
| TIC:         |           | 12.1277       | ng/uL     |         |                |        |       |                 |
| TIM:         |           | 3.0065        | nmole/L   |         |                |        |       |                 |
| Total Conc.: |           | 12.1430       | ng/uL     |         |                |        |       |                 |
| GQN:         |           | 1.9           |           |         |                |        |       |                 |

Sample Peak Width (sec): 50    Sample Min Peak Height: 50    Sample Baseline V to V?: Y    Sample Baseline V to V pts: 3  
 Sample Filter: Binomial    # of Pts for Filter: 3    Sample Start Region (min): 0    Sample End Region (min): 50  
 Manual Baseline Start (min): 6    Manual Baseline End (min): 48  
 Marker Peak Width (sec): 5    Marker Min Peak Height: 200    Marker Baseline V to V?: Y    Marker Baseline V to V pts: 3  
 Lower Marker Selection: First Peak > 200 RFU    Upper Marker Selection: Last Peak > 200 RFU  
 Ladder Size (bp): 1, 75, 200, 300, 400, 500, 700, 1000, 1500, 2000, 3000, 4000, 5000, 7000, 10000, 20000  
 Quantification Using: Ladder    Final Concentration (ng/uL): 1.0417    Dilution Factor: 12.0  
 Size Threshold (b.p.): 10000

**Data File:** 2019 06 18 13H 16M.raw  
**Sample:** 103613-001-067 (20x dil.)  
**Well Location:** C9

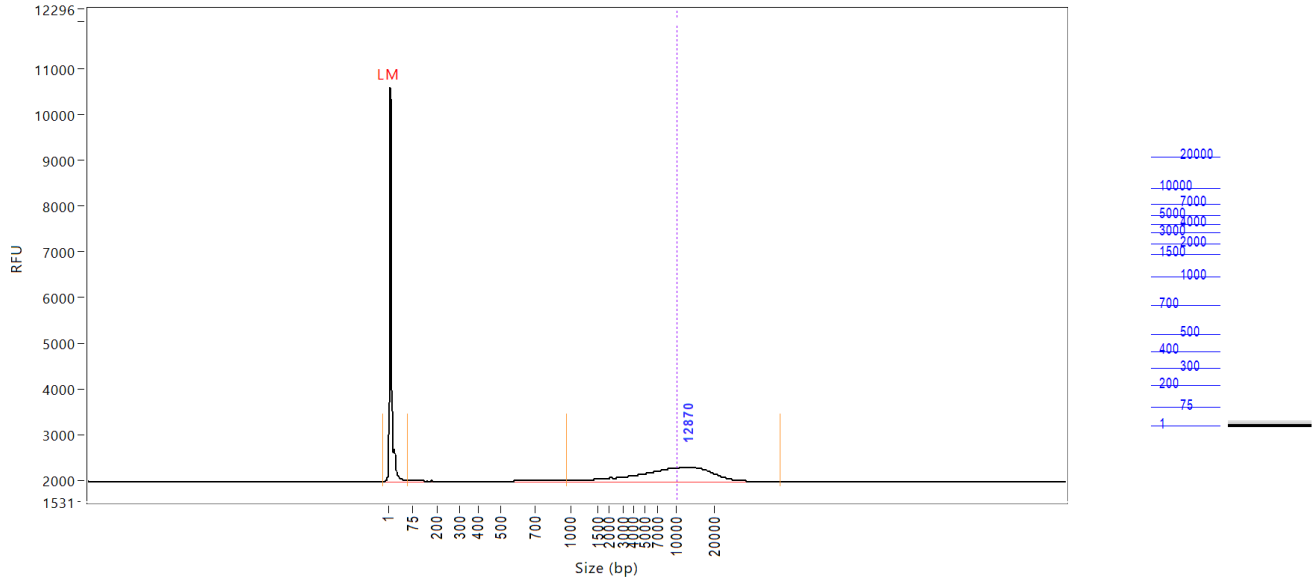

| Peak         | Size (bp) | Conc. (ng/uL) | From (bp) | To (bp) | Avg. Size (bp) | CV%    | RFU  | Corr. Peak Area |
|--------------|-----------|---------------|-----------|---------|----------------|--------|------|-----------------|
| 1            | 1 (LM)    | 0.0328        | 0         | 56      | 3              | 273.68 | 8606 | 59.830          |
| 2            | 12870     | 0.3682        | 961       | 37343   | 10354          | 62.73  | 316  | 55.971          |
| TIC:         |           | 0.3682        | ng/uL     |         |                |        |      |                 |
| TIM:         |           | 0.0586        | nmole/L   |         |                |        |      |                 |
| Total Conc.: |           | 0.4240        | ng/uL     |         |                |        |      |                 |
| GQN:         |           | 4.1           |           |         |                |        |      |                 |

Sample Peak Width (sec): 50    Sample Min Peak Height: 50    Sample Baseline V to V?: Y    Sample Baseline V to V pts: 3  
Sample Filter: Binomial    # of Pts for Filter: 3    Sample Start Region (min): 0    Sample End Region (min): 50  
Manual Baseline Start (min): 6    Manual Baseline End (min): 48  
Marker Peak Width (sec): 5    Marker Min Peak Height: 200    Marker Baseline V to V?: Y    Marker Baseline V to V pts: 3  
Lower Marker Selection: First Peak > 200 RFU    Upper Marker Selection: Last Peak > 200 RFU  
Ladder Size (bp): 1, 75, 200, 300, 400, 500, 700, 1000, 1500, 2000, 3000, 4000, 5000, 7000, 10000, 20000  
Quantification Using: Ladder    Final Concentration (ng/uL): 1.0417    Dilution Factor: 12.0  
Size Threshold (b.p.): 10000

**Data File:** 2019 06 18 13H 16M.raw  
**Sample:** 103613-001-068 (20x dil.)  
**Well Location:** D9

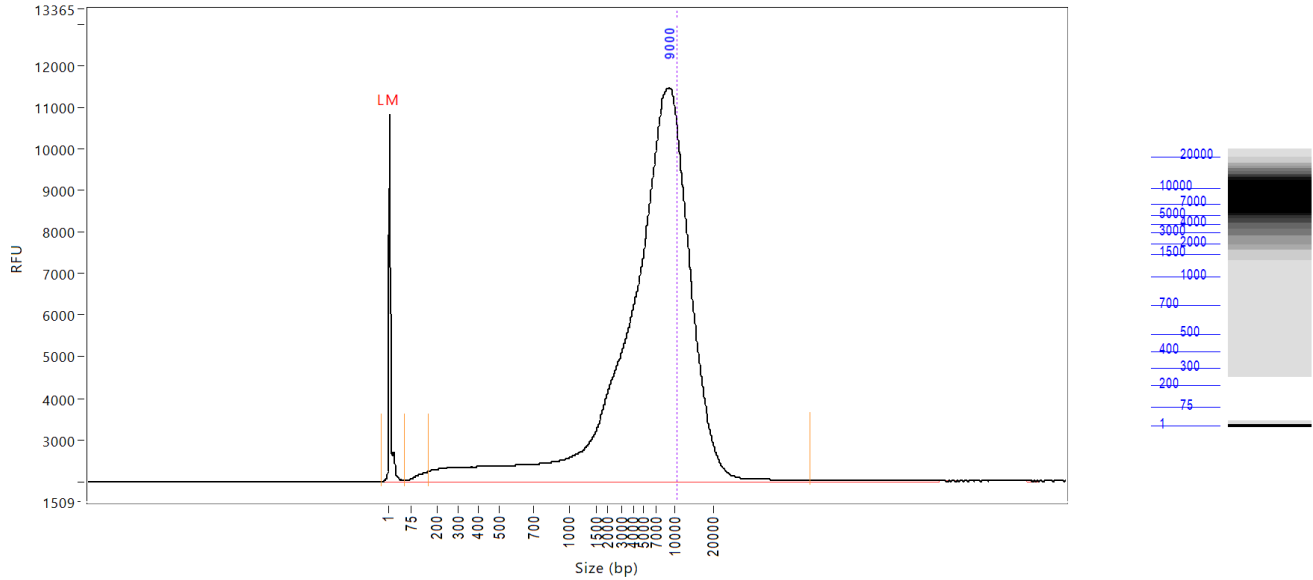

| Peak         | Size (bp) | Conc. (ng/uL) | From (bp) | To (bp) | Avg. Size (bp) | CV%    | RFU  | Corr. Peak Area |
|--------------|-----------|---------------|-----------|---------|----------------|--------|------|-----------------|
| 1            | 1 (LM)    | 0.0328        | 0         | 50      | 2              | 323.94 | 8844 | 60.674          |
| 2            | 9000      | 8.2598        | 154       | 45368   | 7115           | 70.56  | 9467 | 1273.141        |
| TIC:         |           | 8.2598        | ng/uL     |         |                |        |      |                 |
| TIM:         |           | 1.9112        | nmole/L   |         |                |        |      |                 |
| Total Conc.: |           | 8.3488        | ng/uL     |         |                |        |      |                 |
| GQN:         |           | 2.4           |           |         |                |        |      |                 |

Sample Peak Width (sec): 50    Sample Min Peak Height: 50    Sample Baseline V to V?: Y    Sample Baseline V to V pts: 3  
Sample Filter: Binomial    # of Pts for Filter: 3    Sample Start Region (min): 0    Sample End Region (min): 50  
Manual Baseline Start (min): 6    Manual Baseline End (min): 48  
Marker Peak Width (sec): 5    Marker Min Peak Height: 200    Marker Baseline V to V?: Y    Marker Baseline V to V pts: 3  
Lower Marker Selection: First Peak > 200 RFU    Upper Marker Selection: Last Peak > 200 RFU  
Ladder Size (bp): 1, 75, 200, 300, 400, 500, 700, 1000, 1500, 2000, 3000, 4000, 5000, 7000, 10000, 20000  
Quantification Using: Ladder    Final Concentration (ng/uL): 1.0417    Dilution Factor: 12.0  
Size Threshold (b.p.): 10000

**Data File:** 2019 06 18 13H 16M.raw  
**Sample:** 103613-001-069 (20x dil.)  
**Well Location:** E9

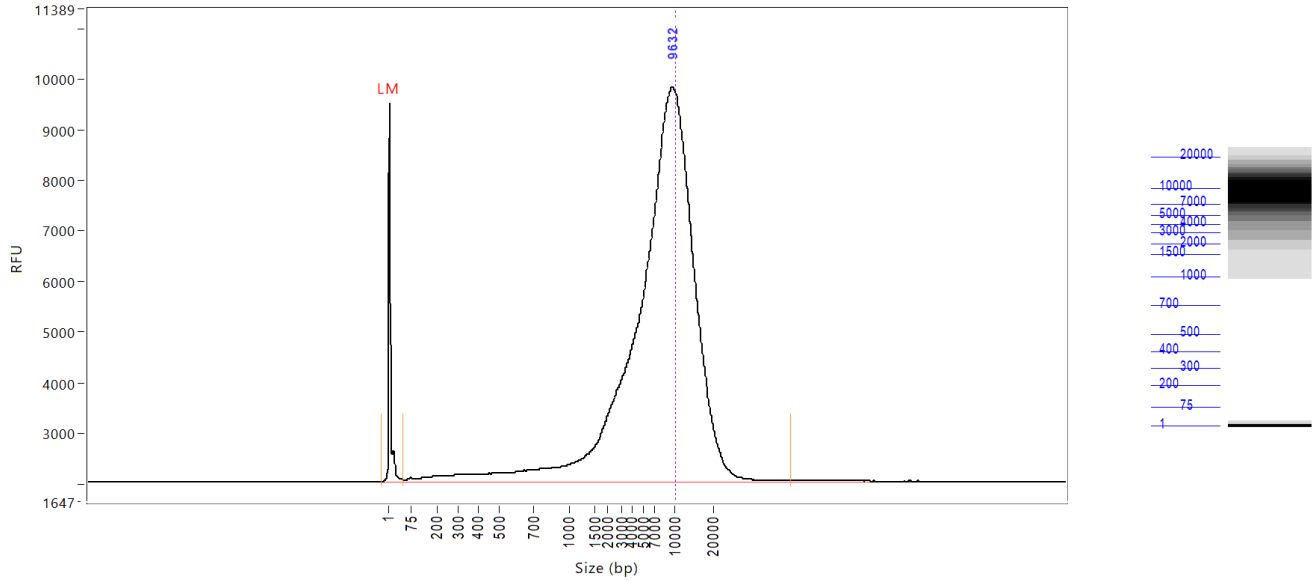

| Peak         | Size (bp) | Conc. (ng/uL) | From (bp) | To (bp) | Avg. Size (bp) | CV%    | RFU  | Corr. Peak Area |
|--------------|-----------|---------------|-----------|---------|----------------|--------|------|-----------------|
| 1            | 1 (LM)    | 0.0328        | 0         | 46      | 3              | 254.98 | 7487 | 52.609          |
| 2            | 9632      | 7.4061        | 46        | 40277   | 8227           | 62.62  | 7780 | 989.823         |
| TIC:         |           | 7.4061        | ng/uL     |         |                |        |      |                 |
| TIM:         |           | 1.4820        | nmole/L   |         |                |        |      |                 |
| Total Conc.: |           | 7.4291        | ng/uL     |         |                |        |      |                 |
| GQN:         |           | 3.3           |           |         |                |        |      |                 |

Sample Peak Width (sec): 50    Sample Min Peak Height: 50    Sample Baseline V to V?: Y    Sample Baseline V to V pts: 3  
Sample Filter: Binomial    # of Pts for Filter: 3    Sample Start Region (min): 0    Sample End Region (min): 50  
Manual Baseline Start (min): 6    Manual Baseline End (min): 48  
Marker Peak Width (sec): 5    Marker Min Peak Height: 200    Marker Baseline V to V?: Y    Marker Baseline V to V pts: 3  
Lower Marker Selection: First Peak > 200 RFU    Upper Marker Selection: Last Peak > 200 RFU  
Ladder Size (bp): 1, 75, 200, 300, 400, 500, 700, 1000, 1500, 2000, 3000, 4000, 5000, 7000, 10000, 20000  
Quantification Using: Ladder    Final Concentration (ng/uL): 1.0417    Dilution Factor: 12.0  
Size Threshold (b.p.): 10000

**Data File:** 2019 06 18 13H 16M.raw  
**Sample:** 103613-001-070 (20x dil.)  
**Well Location:** F9

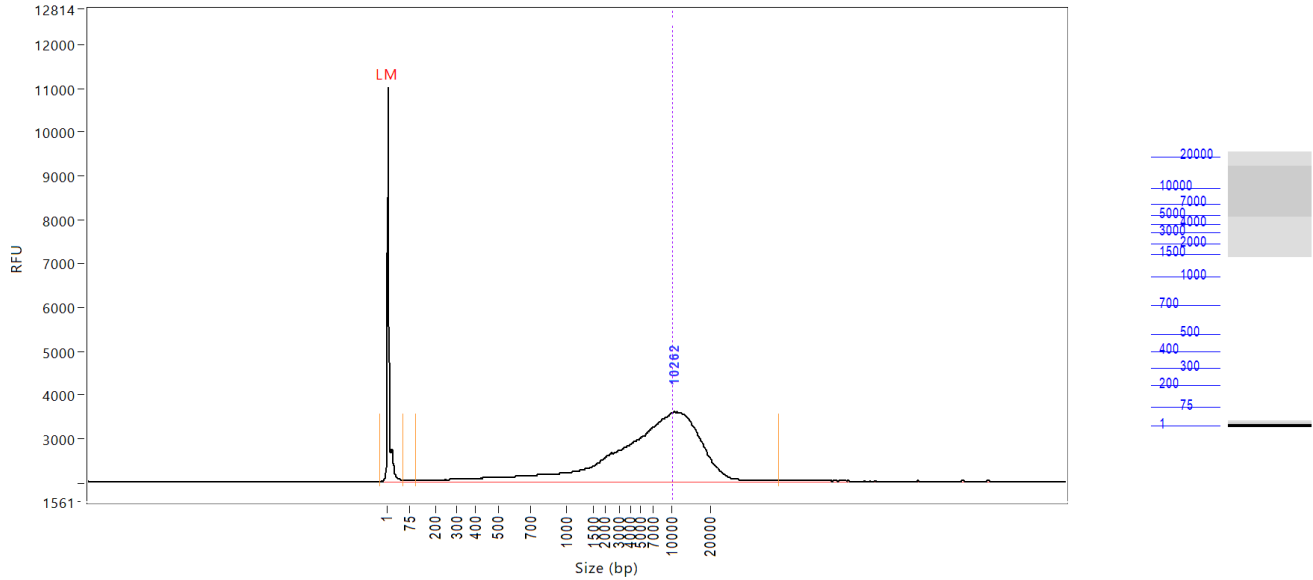

| Peak         | Size (bp) | Conc. (ng/uL) | From (bp) | To (bp) | Avg. Size (bp) | CV%    | RFU  | Corr. Peak Area |
|--------------|-----------|---------------|-----------|---------|----------------|--------|------|-----------------|
| 1            | 1 (LM)    | 0.0328        | 0         | 50      | 3              | 278.67 | 8991 | 62.398          |
| 2            | 10262     | 1.9288        | 101       | 38034   | 7903           | 77.88  | 1596 | 305.755         |
| TIC:         |           | 1.9288        | ng/uL     |         |                |        |      |                 |
| TIM:         |           | 0.4018        | nmole/L   |         |                |        |      |                 |
| Total Conc.: |           | 1.9781        | ng/uL     |         |                |        |      |                 |
| GQN:         |           | 3.4           |           |         |                |        |      |                 |

Sample Peak Width (sec): 50    Sample Min Peak Height: 50    Sample Baseline V to V?: Y    Sample Baseline V to V pts: 3  
Sample Filter: Binomial    # of Pts for Filter: 3    Sample Start Region (min): 0    Sample End Region (min): 50  
Manual Baseline Start (min): 6    Manual Baseline End (min): 48  
Marker Peak Width (sec): 5    Marker Min Peak Height: 200    Marker Baseline V to V?: Y    Marker Baseline V to V pts: 3  
Lower Marker Selection: First Peak > 200 RFU    Upper Marker Selection: Last Peak > 200 RFU  
Ladder Size (bp): 1, 75, 200, 300, 400, 500, 700, 1000, 1500, 2000, 3000, 4000, 5000, 7000, 10000, 20000  
Quantification Using: Ladder    Final Concentration (ng/uL): 1.0417    Dilution Factor: 12.0  
Size Threshold (b.p.): 10000

Data File: 2019 06 18 13H 16M.raw

Sample: 103613-001-071 (20x dil.)

Well Location: G9

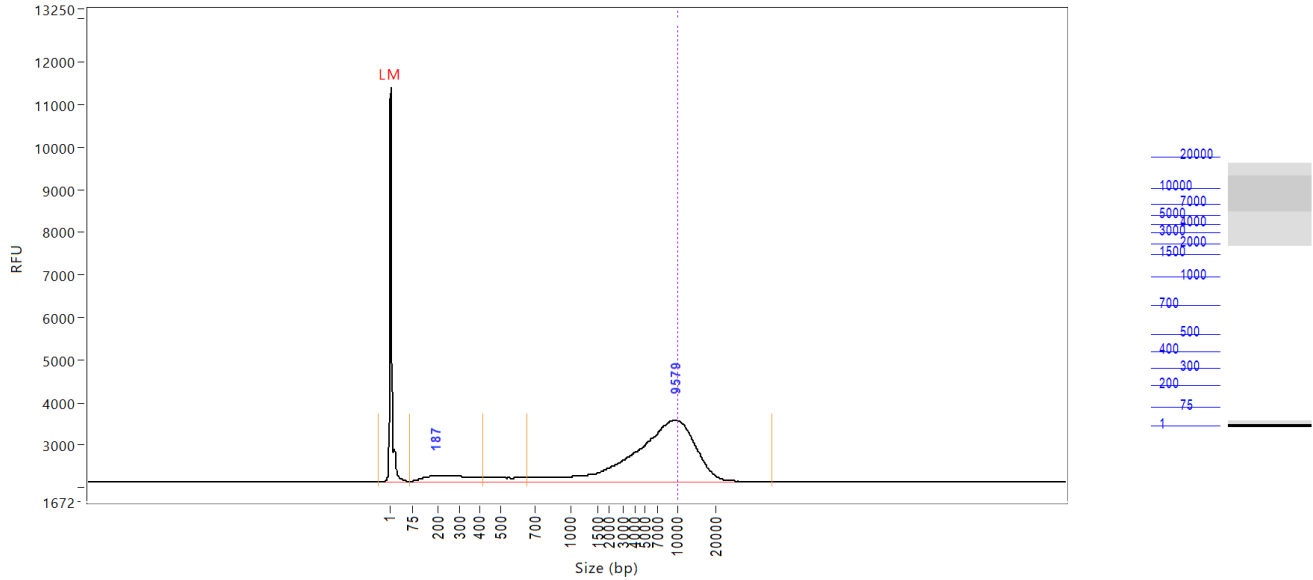

| Peak         | Size (bp) | Conc. (ng/uL) | From (bp) | To (bp) | Avg. Size (bp) | CV%    | RFU  | Corr. Peak Area |
|--------------|-----------|---------------|-----------|---------|----------------|--------|------|-----------------|
| 1            | 1 (LM)    | 0.0328        | 0         | 64      | 2              | 371.97 | 9255 | 65.471          |
| 2            | 187       | 0.1296        | 64        | 416     | 246            | 36.31  | 139  | 21.554          |
| 3            | 9579      | 1.1824        | 651       | 34582   | 7696           | 63.02  | 1455 | 196.655         |
| TIC:         |           | 1.3119        | ng/uL     |         |                |        |      |                 |
| TIM:         |           | 1.1193        | nmole/L   |         |                |        |      |                 |
| Total Conc.: |           | 1.3810        | ng/uL     |         |                |        |      |                 |
| GQN:         |           | 2.5           |           |         |                |        |      |                 |

Sample Peak Width (sec): 50    Sample Min Peak Height: 50    Sample Baseline V to V?: Y    Sample Baseline V to V pts: 3  
 Sample Filter: Binomial    # of Pts for Filter: 3    Sample Start Region (min): 0    Sample End Region (min): 50  
 Manual Baseline Start (min): 6    Manual Baseline End (min): 48  
 Marker Peak Width (sec): 5    Marker Min Peak Height: 200    Marker Baseline V to V?: Y    Marker Baseline V to V pts: 3  
 Lower Marker Selection: First Peak > 200 RFU    Upper Marker Selection: Last Peak > 200 RFU  
 Ladder Size (bp): 1, 75, 200, 300, 400, 500, 700, 1000, 1500, 2000, 3000, 4000, 5000, 7000, 10000, 20000  
 Quantification Using: Ladder    Final Concentration (ng/uL): 1.0417    Dilution Factor: 12.0  
 Size Threshold (b.p.): 10000

**Data File:** 2019 06 18 13H 16M.raw  
**Sample:** 103613-001-072 (20x dil.)  
**Well Location:** H9

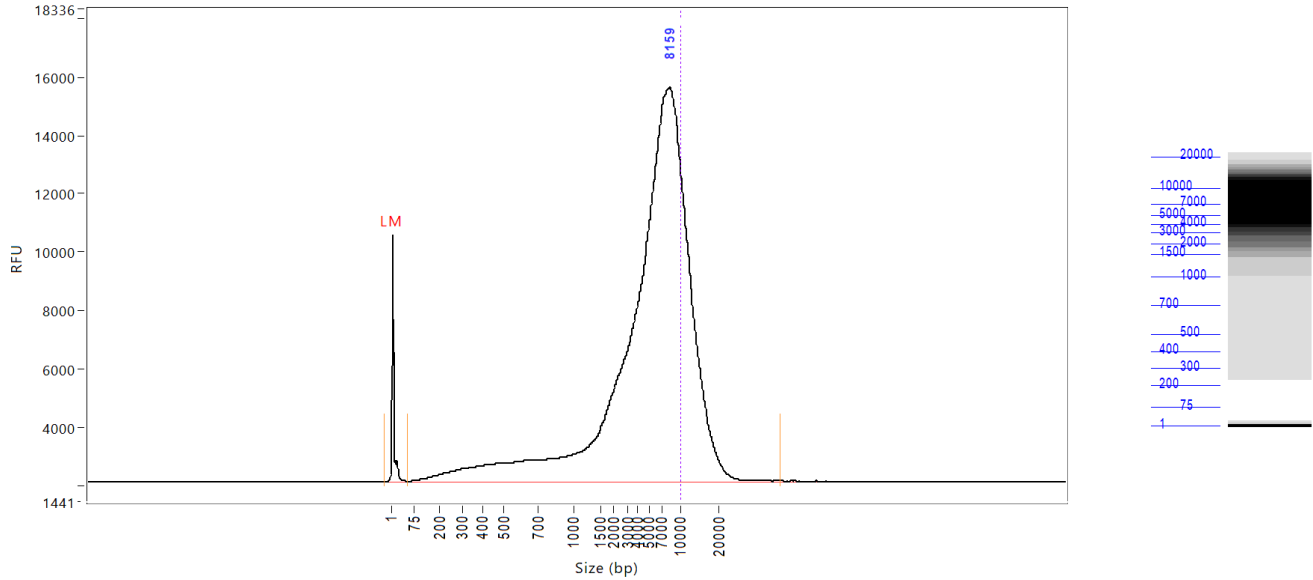

| Peak         | Size (bp) | Conc. (ng/uL) | From (bp) | To (bp) | Avg. Size (bp) | CV%    | RFU   | Corr. Peak Area |
|--------------|-----------|---------------|-----------|---------|----------------|--------|-------|-----------------|
| 1            | 1 (LM)    | 0.0328        | 0         | 50      | 2              | 294.31 | 8473  | 58.404          |
| 2            | 8159      | 11.4566       | 50        | 35876   | 6321           | 69.46  | 13507 | 1699.829        |
| TIC:         |           | 11.4566       | ng/uL     |         |                |        |       |                 |
| TIM:         |           | 2.9838        | nmole/L   |         |                |        |       |                 |
| Total Conc.: |           | 11.5051       | ng/uL     |         |                |        |       |                 |
| GQN:         |           | 1.8           |           |         |                |        |       |                 |

Sample Peak Width (sec): 50    Sample Min Peak Height: 50    Sample Baseline V to V?: Y    Sample Baseline V to V pts: 3  
Sample Filter: Binomial    # of Pts for Filter: 3    Sample Start Region (min): 0    Sample End Region (min): 50  
Manual Baseline Start (min): 6    Manual Baseline End (min): 48  
Marker Peak Width (sec): 5    Marker Min Peak Height: 200    Marker Baseline V to V?: Y    Marker Baseline V to V pts: 3  
Lower Marker Selection: First Peak > 200 RFU    Upper Marker Selection: Last Peak > 200 RFU  
Ladder Size (bp): 1, 75, 200, 300, 400, 500, 700, 1000, 1500, 2000, 3000, 4000, 5000, 7000, 10000, 20000  
Quantification Using: Ladder    Final Concentration (ng/uL): 1.0417    Dilution Factor: 12.0  
Size Threshold (b.p.): 10000



**Data File:** 2019 06 18 13H 16M.raw  
**Sample:** 103613-001-073 (20x dil.)  
**Well Location:** A10

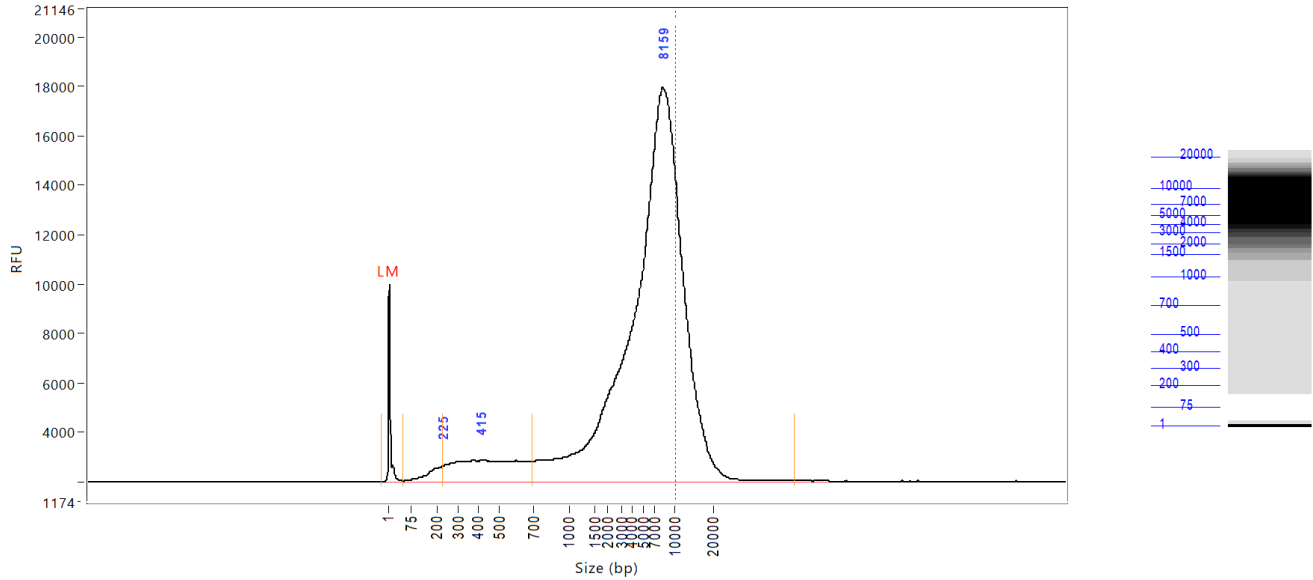

| Peak         | Size (bp) | Conc. (ng/uL) | From (bp) | To (bp) | Avg. Size (bp) | CV%    | RFU   | Corr. Peak Area |
|--------------|-----------|---------------|-----------|---------|----------------|--------|-------|-----------------|
| 1            | 1 (LM)    | 0.0328        | 0         | 45      | 2              | 329.85 | 7962  | 55.243          |
| 2            | 225       | 0.2354        | 45        | 227     | 168            | 27.25  | 652   | 33.029          |
| 3            | 415       | 1.3025        | 227       | 694     | 444            | 29.75  | 841   | 182.788         |
| 4            | 8159      | 12.3491       | 694       | 41658   | 7044           | 60.93  | 15958 | 1733.077        |
| TIC:         |           | 13.8869       | ng/uL     |         |                |        |       |                 |
| TIM:         |           | 10.0158       | nmole/L   |         |                |        |       |                 |
| Total Conc.: |           | 13.9100       | ng/uL     |         |                |        |       |                 |
| GQN:         |           | 1.8           |           |         |                |        |       |                 |

Sample Peak Width (sec): 50    Sample Min Peak Height: 50    Sample Baseline V to V?: Y    Sample Baseline V to V pts: 3  
Sample Filter: Binomial    # of Pts for Filter: 3    Sample Start Region (min): 0    Sample End Region (min): 50  
Manual Baseline Start (min): 6    Manual Baseline End (min): 48  
Marker Peak Width (sec): 5    Marker Min Peak Height: 200    Marker Baseline V to V?: Y    Marker Baseline V to V pts: 3  
Lower Marker Selection: First Peak > 200 RFU    Upper Marker Selection: Last Peak > 200 RFU  
Ladder Size (bp): 1, 75, 200, 300, 400, 500, 700, 1000, 1500, 2000, 3000, 4000, 5000, 7000, 10000, 20000  
Quantification Using: Ladder    Final Concentration (ng/uL): 1.0417    Dilution Factor: 12.0  
Size Threshold (b.p.): 10000

**Data File:** 2019 06 18 13H 16M.raw  
**Sample:** 103613-001-074 (20x dil.)  
**Well Location:** B10

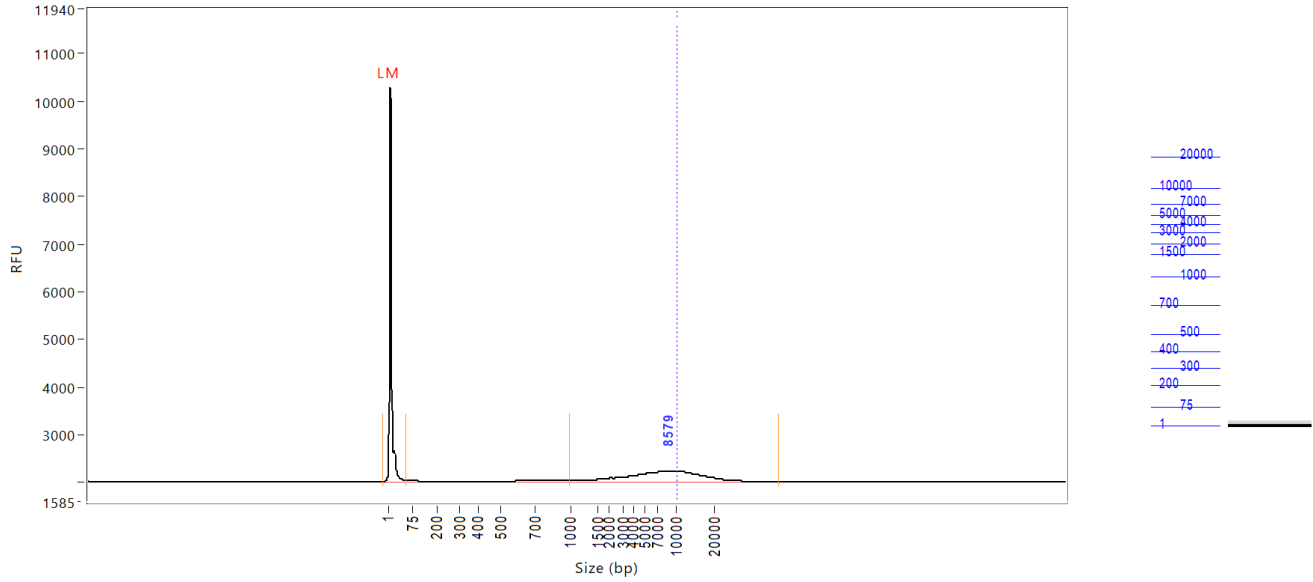

| Peak         | Size (bp) | Conc. (ng/uL) | From (bp) | To (bp) | Avg. Size (bp) | CV%    | RFU  | Corr. Peak Area |
|--------------|-----------|---------------|-----------|---------|----------------|--------|------|-----------------|
| 1            | 1 (LM)    | 0.0328        | 0         | 52      | 3              | 269.51 | 8277 | 57.647          |
| 2            | 8579      | 0.2579        | 992       | 36998   | 8927           | 69.58  | 217  | 37.762          |
| TIC:         |           | 0.2579        | ng/uL     |         |                |        |      |                 |
| TIM:         |           | 0.0476        | nmole/L   |         |                |        |      |                 |
| Total Conc.: |           | 0.3045        | ng/uL     |         |                |        |      |                 |
| GQN:         |           | 3.1           |           |         |                |        |      |                 |

Sample Peak Width (sec): 50    Sample Min Peak Height: 50    Sample Baseline V to V?: Y    Sample Baseline V to V pts: 3  
Sample Filter: Binomial    # of Pts for Filter: 3    Sample Start Region (min): 0    Sample End Region (min): 50  
Manual Baseline Start (min): 6    Manual Baseline End (min): 48  
Marker Peak Width (sec): 5    Marker Min Peak Height: 200    Marker Baseline V to V?: Y    Marker Baseline V to V pts: 3  
Lower Marker Selection: First Peak > 200 RFU    Upper Marker Selection: Last Peak > 200 RFU  
Ladder Size (bp): 1, 75, 200, 300, 400, 500, 700, 1000, 1500, 2000, 3000, 4000, 5000, 7000, 10000, 20000  
Quantification Using: Ladder    Final Concentration (ng/uL): 1.0417    Dilution Factor: 12.0  
Size Threshold (b.p.): 10000

**Data File:** 2019 06 18 13H 16M.raw  
**Sample:** 103613-001-075 (20x dil.)  
**Well Location:** C10

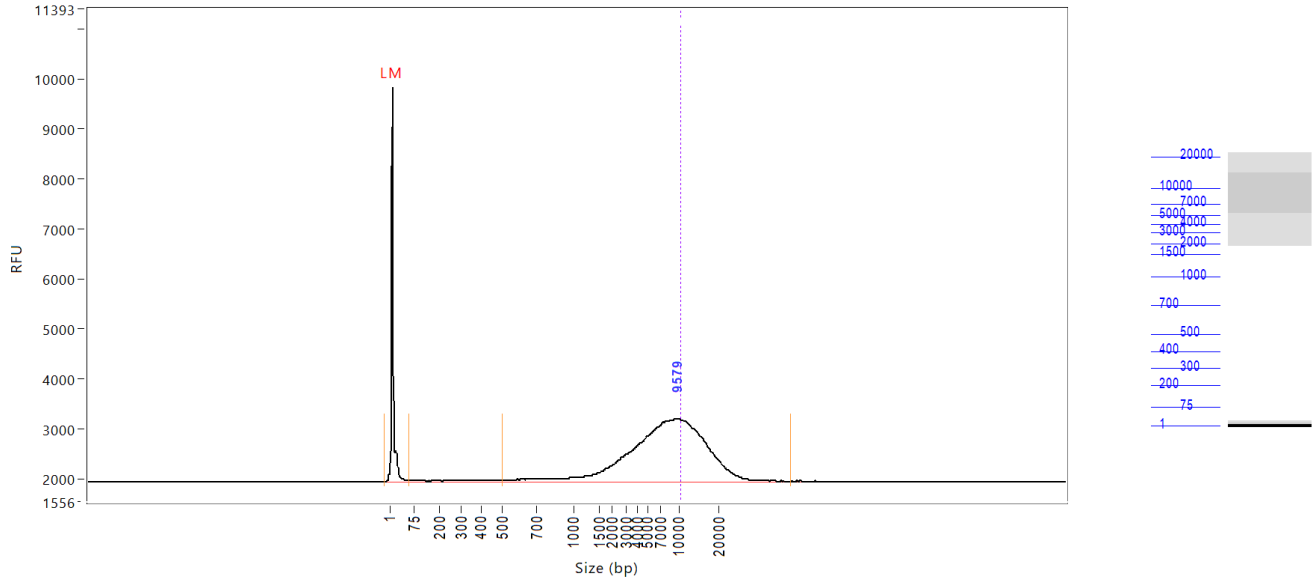

| Peak         | Size (bp) | Conc. (ng/uL) | From (bp) | To (bp) | Avg. Size (bp) | CV%    | RFU  | Corr. Peak Area |
|--------------|-----------|---------------|-----------|---------|----------------|--------|------|-----------------|
| 1            | 1 (LM)    | 0.0328        | 0         | 57      | 3              | 265.17 | 7863 | 55.838          |
| 2            | 9579      | 1.5377        | 498       | 38810   | 8757           | 67.30  | 1255 | 218.119         |
| TIC:         |           | 1.5377        | ng/uL     |         |                |        |      |                 |
| TIM:         |           | 0.2891        | nmole/L   |         |                |        |      |                 |
| Total Conc.: |           | 1.5879        | ng/uL     |         |                |        |      |                 |
| GQN:         |           | 3.5           |           |         |                |        |      |                 |

Sample Peak Width (sec): 50    Sample Min Peak Height: 50    Sample Baseline V to V?: Y    Sample Baseline V to V pts: 3  
Sample Filter: Binomial    # of Pts for Filter: 3    Sample Start Region (min): 0    Sample End Region (min): 50  
Manual Baseline Start (min): 6    Manual Baseline End (min): 48  
Marker Peak Width (sec): 5    Marker Min Peak Height: 200    Marker Baseline V to V?: Y    Marker Baseline V to V pts: 3  
Lower Marker Selection: First Peak > 200 RFU    Upper Marker Selection: Last Peak > 200 RFU  
Ladder Size (bp): 1, 75, 200, 300, 400, 500, 700, 1000, 1500, 2000, 3000, 4000, 5000, 7000, 10000, 20000  
Quantification Using: Ladder    Final Concentration (ng/uL): 1.0417    Dilution Factor: 12.0  
Size Threshold (b.p.): 10000

**Data File:** 2019 06 18 13H 16M.raw  
**Sample:** 103613-001-076 (20x dil.)  
**Well Location:** D10

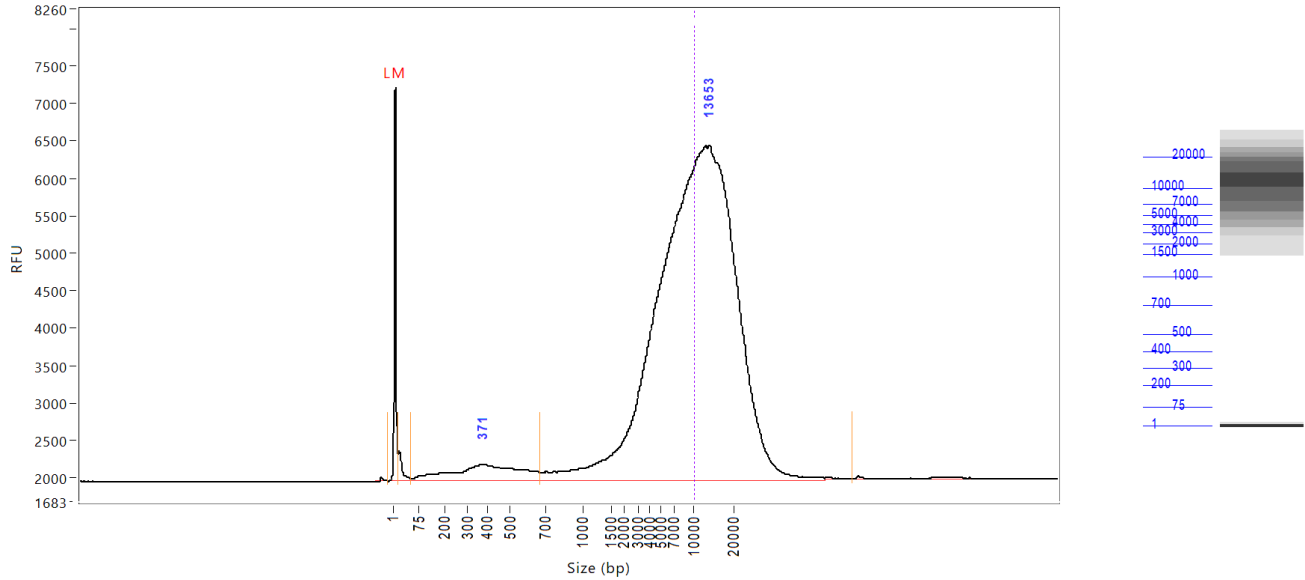

| Peak         | Size (bp) | Conc. (ng/uL) | From (bp) | To (bp) | Avg. Size (bp) | CV%      | RFU  | Corr. Peak Area |
|--------------|-----------|---------------|-----------|---------|----------------|----------|------|-----------------|
| 1            | 1 (LM)    | 0.0328        | 0         | 9       | 0              | -1709.09 | 5248 | 32.840          |
| 2            | 371       | 0.4908        | 49        | 665     | 365            | 42.35    | 218  | 40.942          |
| 3            | 13653     | 10.1617       | 665       | 49596   | 11288          | 59.55    | 4461 | 847.763         |
| TIC:         |           | 10.6525       | ng/uL     |         |                |          |      |                 |
| TIM:         |           | 3.6941        | nmole/L   |         |                |          |      |                 |
| Total Conc.: |           | 10.7700       | ng/uL     |         |                |          |      |                 |
| GQN:         |           | 4.8           |           |         |                |          |      |                 |

Sample Peak Width (sec): 50    Sample Min Peak Height: 50    Sample Baseline V to V?: Y    Sample Baseline V to V pts: 3  
Sample Filter: Binomial    # of Pts for Filter: 3    Sample Start Region (min): 0    Sample End Region (min): 50  
Manual Baseline Start (min): 6    Manual Baseline End (min): 48  
Marker Peak Width (sec): 5    Marker Min Peak Height: 200    Marker Baseline V to V?: Y    Marker Baseline V to V pts: 3  
Lower Marker Selection: First Peak > 200 RFU    Upper Marker Selection: Last Peak > 200 RFU  
Ladder Size (bp): 1, 75, 200, 300, 400, 500, 700, 1000, 1500, 2000, 3000, 4000, 5000, 7000, 10000, 20000  
Quantification Using: Ladder    Final Concentration (ng/uL): 1.0417    Dilution Factor: 12.0  
Size Threshold (b.p.): 10000

Data File: 2019 06 18 13H 16M.raw

Sample: 103613-001-077 (20x dil.)

Well Location: E10

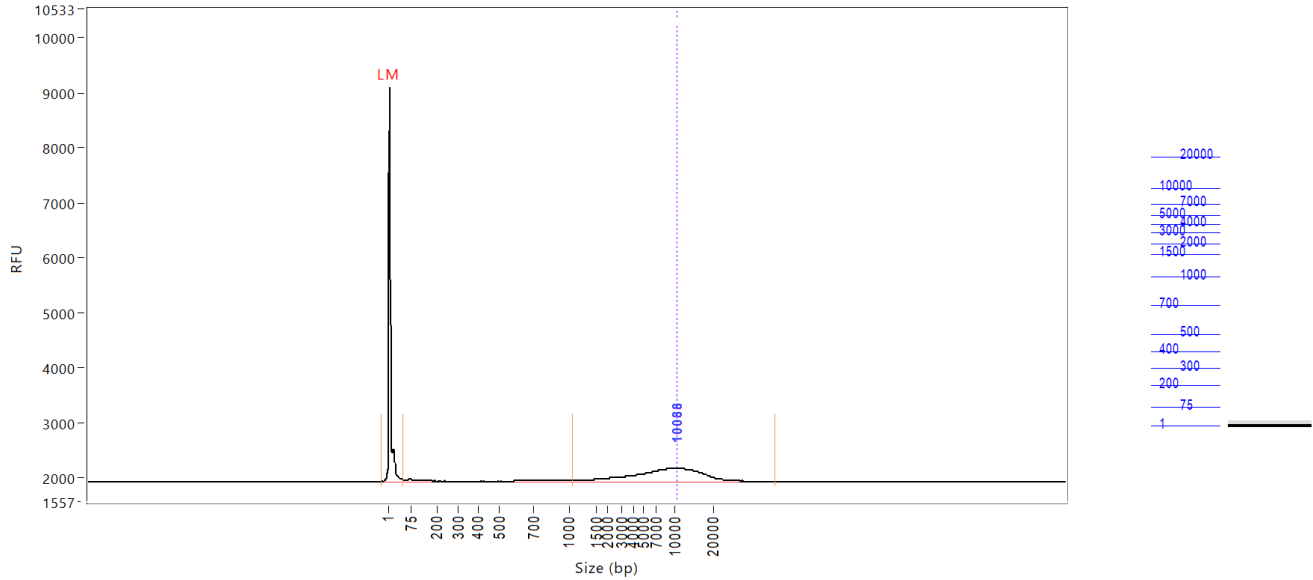

| Peak         | Size (bp) | Conc. (ng/uL) | From (bp) | To (bp) | Avg. Size (bp) | CV%    | RFU  | Corr. Peak Area |
|--------------|-----------|---------------|-----------|---------|----------------|--------|------|-----------------|
| 1            | 1 (LM)    | 0.0328        | 0         | 45      | 2              | 374.94 | 7174 | 51.276          |
| 2            | 10088     | 0.2924        | 1038      | 36222   | 9344           | 63.31  | 241  | 38.090          |
| TIC:         |           | 0.2924        | ng/uL     |         |                |        |      |                 |
| TIM:         |           | 0.0515        | nmole/L   |         |                |        |      |                 |
| Total Conc.: |           | 0.3605        | ng/uL     |         |                |        |      |                 |
| GQN:         |           | 3.4           |           |         |                |        |      |                 |

Sample Peak Width (sec): 50    Sample Min Peak Height: 50    Sample Baseline V to V?: Y    Sample Baseline V to V pts: 3  
 Sample Filter: Binomial    # of Pts for Filter: 3    Sample Start Region (min): 0    Sample End Region (min): 50  
 Manual Baseline Start (min): 6    Manual Baseline End (min): 48  
 Marker Peak Width (sec): 5    Marker Min Peak Height: 200    Marker Baseline V to V?: Y    Marker Baseline V to V pts: 3  
 Lower Marker Selection: First Peak > 200 RFU    Upper Marker Selection: Last Peak > 200 RFU  
 Ladder Size (bp): 1, 75, 200, 300, 400, 500, 700, 1000, 1500, 2000, 3000, 4000, 5000, 7000, 10000, 20000  
 Quantification Using: Ladder    Final Concentration (ng/uL): 1.0417    Dilution Factor: 12.0  
 Size Threshold (b.p.): 10000

**Data File:** 2019 06 18 13H 16M.raw  
**Sample:** 103613-001-078 (20x dil.)  
**Well Location:** F10

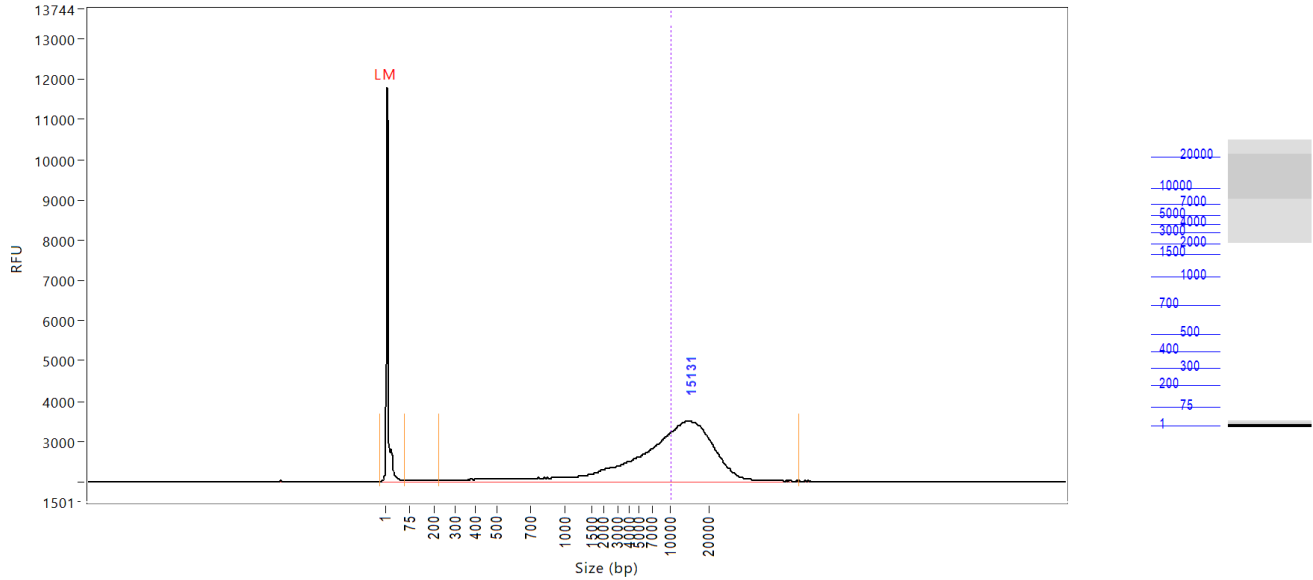

| Peak | Size (bp) | Conc. (ng/uL) | From (bp) | To (bp) | Avg. Size (bp) | CV%    | RFU  | Corr. Peak Area |
|------|-----------|---------------|-----------|---------|----------------|--------|------|-----------------|
| 1    | 1 (LM)    | 0.0328        | 0         | 57      | 2              | 332.82 | 9783 | 68.736          |
| 2    | 15131     | 1.6756        | 215       | 43901   | 10871          | 68.35  | 1516 | 292.598         |

TIC: 1.6756 ng/uL  
 TIM: 0.2538 nmole/L  
 Total Conc.: 1.7106 ng/uL  
 GQN: 5.1

Sample Peak Width (sec): 50    Sample Min Peak Height: 50    Sample Baseline V to V?: Y    Sample Baseline V to V pts: 3  
 Sample Filter: Binomial    # of Pts for Filter: 3    Sample Start Region (min): 0    Sample End Region (min): 50  
 Manual Baseline Start (min): 6    Manual Baseline End (min): 48  
 Marker Peak Width (sec): 5    Marker Min Peak Height: 200    Marker Baseline V to V?: Y    Marker Baseline V to V pts: 3  
 Lower Marker Selection: First Peak > 200 RFU    Upper Marker Selection: Last Peak > 200 RFU  
 Ladder Size (bp): 1, 75, 200, 300, 400, 500, 700, 1000, 1500, 2000, 3000, 4000, 5000, 7000, 10000, 20000  
 Quantification Using: Ladder    Final Concentration (ng/uL): 1.0417    Dilution Factor: 12.0  
 Size Threshold (b.p.): 10000

**Data File:** 2019 06 18 13H 16M.raw  
**Sample:** 103613-001-079 (20x dil.)  
**Well Location:** G10

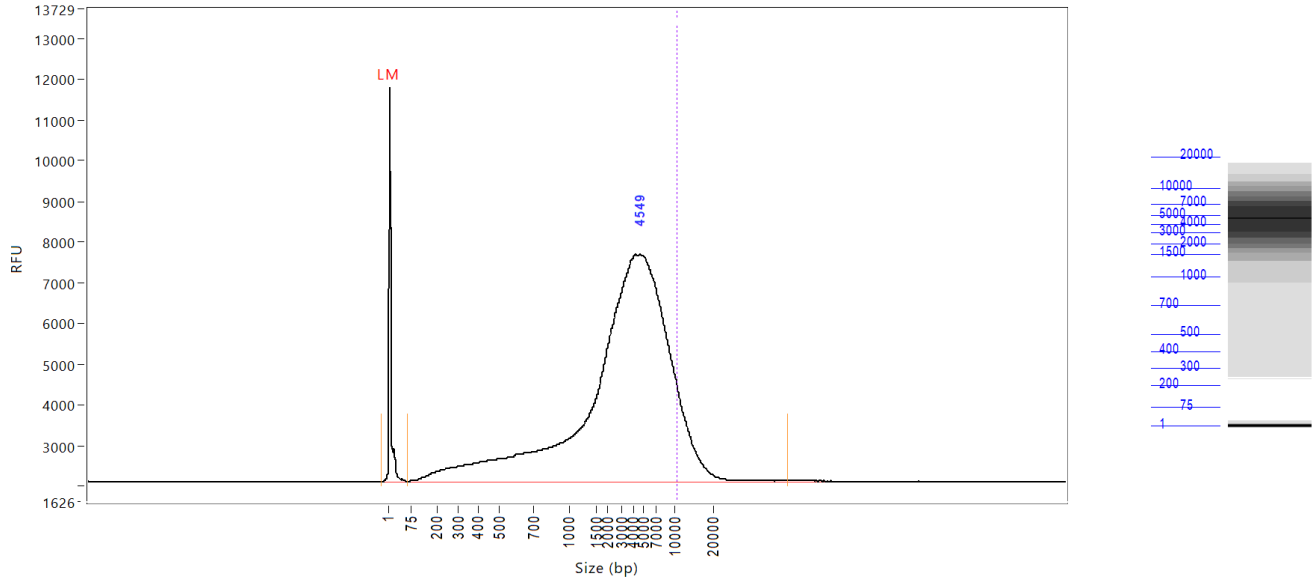

| Peak         | Size (bp) | Conc. (ng/uL) | From (bp) | To (bp) | Avg. Size (bp) | CV%    | RFU  | Corr. Peak Area |
|--------------|-----------|---------------|-----------|---------|----------------|--------|------|-----------------|
| 1            | 1 (LM)    | 0.0328        | 0         | 60      | 3              | 248.31 | 9673 | 68.696          |
| 2            | 4549      | 5.5618        | 60        | 39414   | 4161           | 89.85  | 5587 | 970.619         |
| TIC:         |           | 5.5618        | ng/uL     |         |                |        |      |                 |
| TIM:         |           | 2.2005        | nmole/L   |         |                |        |      |                 |
| Total Conc.: |           | 5.5820        | ng/uL     |         |                |        |      |                 |
| GQN:         |           | 0.7           |           |         |                |        |      |                 |

Sample Peak Width (sec): 50    Sample Min Peak Height: 50    Sample Baseline V to V?: Y    Sample Baseline V to V pts: 3  
Sample Filter: Binomial    # of Pts for Filter: 3    Sample Start Region (min): 0    Sample End Region (min): 50  
Manual Baseline Start (min): 6    Manual Baseline End (min): 48  
Marker Peak Width (sec): 5    Marker Min Peak Height: 200    Marker Baseline V to V?: Y    Marker Baseline V to V pts: 3  
Lower Marker Selection: First Peak > 200 RFU    Upper Marker Selection: Last Peak > 200 RFU  
Ladder Size (bp): 1, 75, 200, 300, 400, 500, 700, 1000, 1500, 2000, 3000, 4000, 5000, 7000, 10000, 20000  
Quantification Using: Ladder    Final Concentration (ng/uL): 1.0417    Dilution Factor: 12.0  
Size Threshold (b.p.): 10000

**Data File:** 2019 06 18 13H 16M.raw  
**Sample:** 103613-001-080 (20x dil.)  
**Well Location:** H10

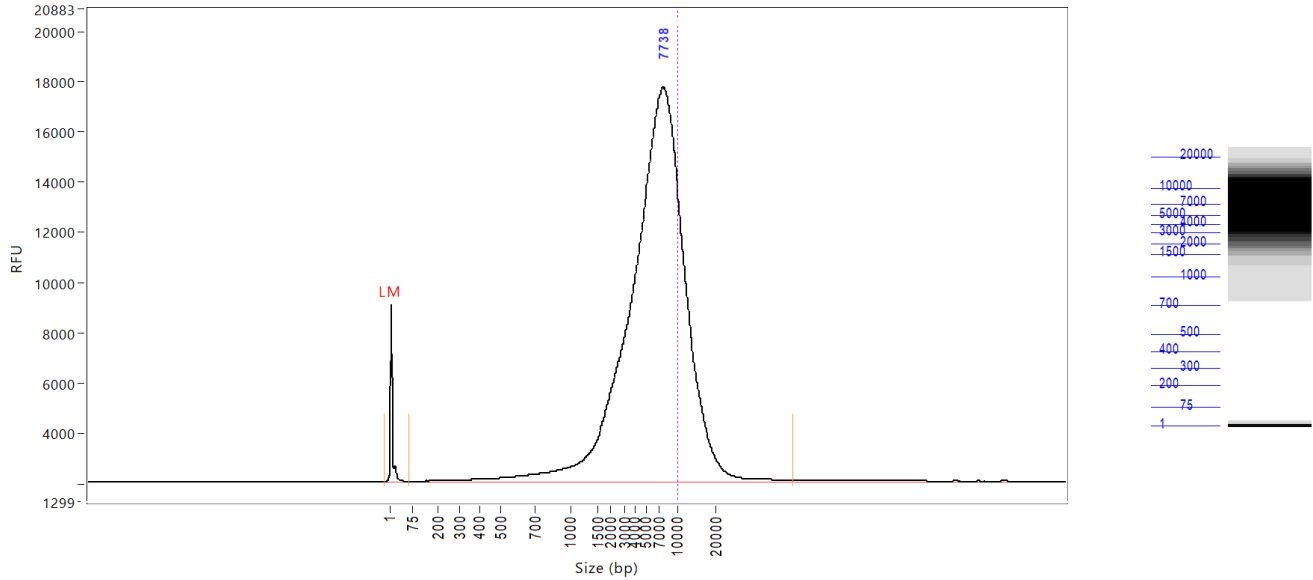

| Peak         | Size (bp) | Conc. (ng/uL) | From (bp) | To (bp) | Avg. Size (bp) | CV%    | RFU   | Corr. Peak Area |
|--------------|-----------|---------------|-----------|---------|----------------|--------|-------|-----------------|
| 1            | 1 (LM)    | 0.0328        | 0         | 59      | 2              | 254.60 | 7033  | 48.964          |
| 2            | 7738      | 14.5603       | 59        | 40277   | 6925           | 62.86  | 15646 | 1811.145        |
| TIC:         |           | 14.5603       | ng/uL     |         |                |        |       |                 |
| TIM:         |           | 3.4615        | nmole/L   |         |                |        |       |                 |
| Total Conc.: |           | 14.6748       | ng/uL     |         |                |        |       |                 |
| GQN:         |           | 1.9           |           |         |                |        |       |                 |

Sample Peak Width (sec): 50    Sample Min Peak Height: 50    Sample Baseline V to V?: Y    Sample Baseline V to V pts: 3  
Sample Filter: Binomial    # of Pts for Filter: 3    Sample Start Region (min): 0    Sample End Region (min): 50  
Manual Baseline Start (min): 6    Manual Baseline End (min): 48  
Marker Peak Width (sec): 5    Marker Min Peak Height: 200    Marker Baseline V to V?: Y    Marker Baseline V to V pts: 3  
Lower Marker Selection: First Peak > 200 RFU    Upper Marker Selection: Last Peak > 200 RFU  
Ladder Size (bp): 1, 75, 200, 300, 400, 500, 700, 1000, 1500, 2000, 3000, 4000, 5000, 7000, 10000, 20000  
Quantification Using: Ladder    Final Concentration (ng/uL): 1.0417    Dilution Factor: 12.0  
Size Threshold (b.p.): 10000



Data File: 2019 06 18 13H 16M.raw

Sample: 103613-001-081 (20x dil.)

Well Location: A11

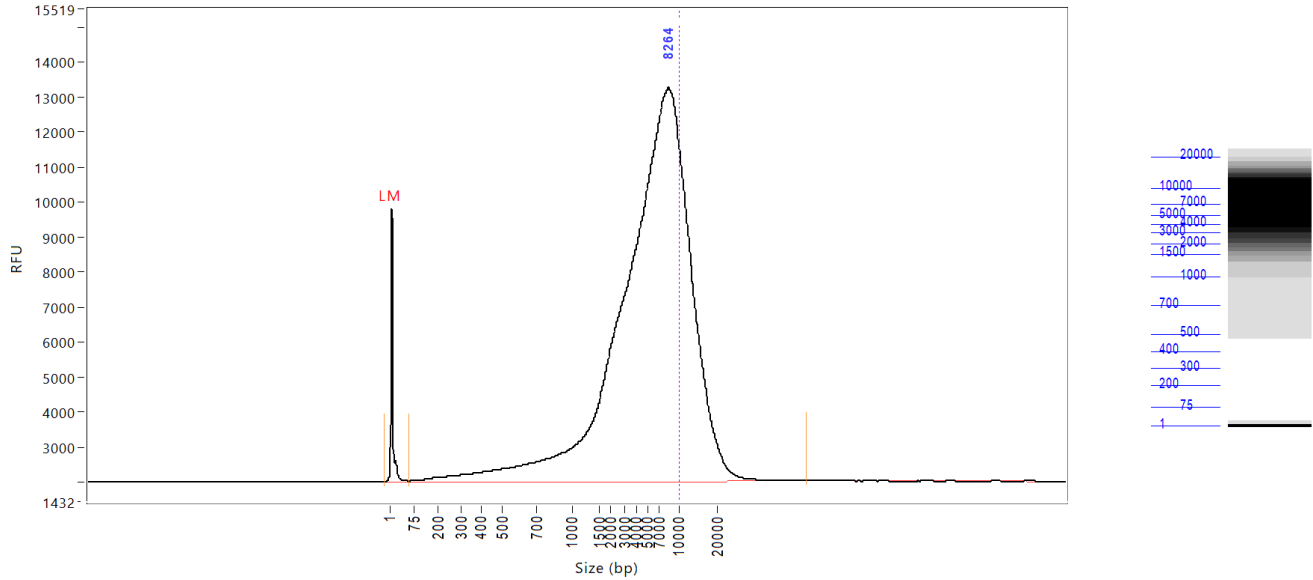

| Peak         | Size (bp) | Conc. (ng/uL) | From (bp) | To (bp) | Avg. Size (bp) | CV%    | RFU   | Corr. Peak Area |
|--------------|-----------|---------------|-----------|---------|----------------|--------|-------|-----------------|
| 1            | 1 (LM)    | 0.0328        | 0         | 55      | 2              | 280.31 | 7782  | 53.318          |
| 2            | 8264      | 12.0904       | 55        | 43124   | 6539           | 71.34  | 11243 | 1637.631        |
| TIC:         |           | 12.0904       | ng/uL     |         |                |        |       |                 |
| TIM:         |           | 3.0439        | nmole/L   |         |                |        |       |                 |
| Total Conc.: |           | 12.1026       | ng/uL     |         |                |        |       |                 |
| GQN:         |           | 2.0           |           |         |                |        |       |                 |

Sample Peak Width (sec): 50    Sample Min Peak Height: 50    Sample Baseline V to V?: Y    Sample Baseline V to V pts: 3  
 Sample Filter: Binomial    # of Pts for Filter: 3    Sample Start Region (min): 0    Sample End Region (min): 50  
 Manual Baseline Start (min): 6    Manual Baseline End (min): 48  
 Marker Peak Width (sec): 5    Marker Min Peak Height: 200    Marker Baseline V to V?: Y    Marker Baseline V to V pts: 3  
 Lower Marker Selection: First Peak > 200 RFU    Upper Marker Selection: Last Peak > 200 RFU  
 Ladder Size (bp): 1, 75, 200, 300, 400, 500, 700, 1000, 1500, 2000, 3000, 4000, 5000, 7000, 10000, 20000  
 Quantification Using: Ladder    Final Concentration (ng/uL): 1.0417    Dilution Factor: 12.0  
 Size Threshold (b.p.): 10000

**Data File:** 2019 06 18 13H 16M.raw  
**Sample:** 103613-001-082 (20x dil.)  
**Well Location:** B11

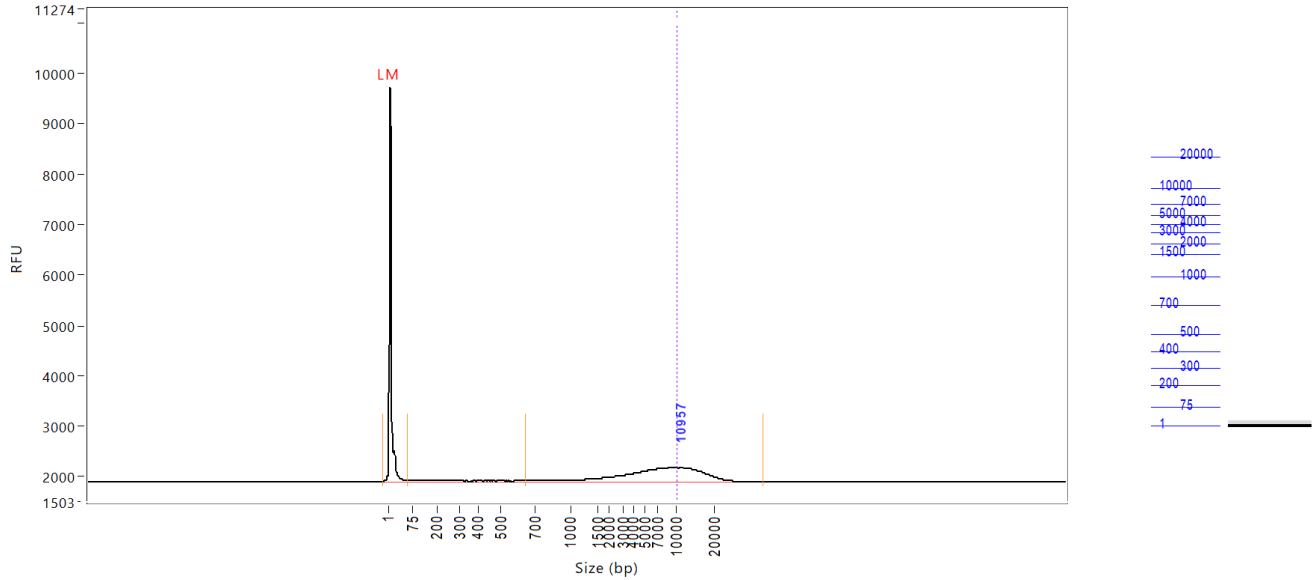

| Peak         | Size (bp) | Conc. (ng/uL) | From (bp) | To (bp) | Avg. Size (bp) | CV%    | RFU  | Corr. Peak Area |
|--------------|-----------|---------------|-----------|---------|----------------|--------|------|-----------------|
| 1            | 1 (LM)    | 0.0328        | 0         | 55      | 2              | 371.45 | 7811 | 55.244          |
| 2            | 10957     | 0.3598        | 643       | 32943   | 8092           | 69.53  | 279  | 50.491          |
| TIC:         |           | 0.3598        | ng/uL     |         |                |        |      |                 |
| TIM:         |           | 0.0732        | nmole/L   |         |                |        |      |                 |
| Total Conc.: |           | 0.4116        | ng/uL     |         |                |        |      |                 |
| GQN:         |           | 2.9           |           |         |                |        |      |                 |

Sample Peak Width (sec): 50    Sample Min Peak Height: 50    Sample Baseline V to V?: Y    Sample Baseline V to V pts: 3  
Sample Filter: Binomial    # of Pts for Filter: 3    Sample Start Region (min): 0    Sample End Region (min): 50  
Manual Baseline Start (min): 6    Manual Baseline End (min): 48  
Marker Peak Width (sec): 5    Marker Min Peak Height: 200    Marker Baseline V to V?: Y    Marker Baseline V to V pts: 3  
Lower Marker Selection: First Peak > 200 RFU    Upper Marker Selection: Last Peak > 200 RFU  
Ladder Size (bp): 1, 75, 200, 300, 400, 500, 700, 1000, 1500, 2000, 3000, 4000, 5000, 7000, 10000, 20000  
Quantification Using: Ladder    Final Concentration (ng/uL): 1.0417    Dilution Factor: 12.0  
Size Threshold (b.p.): 10000

**Data File:** 2019 06 18 13H 16M.raw  
**Sample:** 103613-001-083 (20x dil.)  
**Well Location:** C11

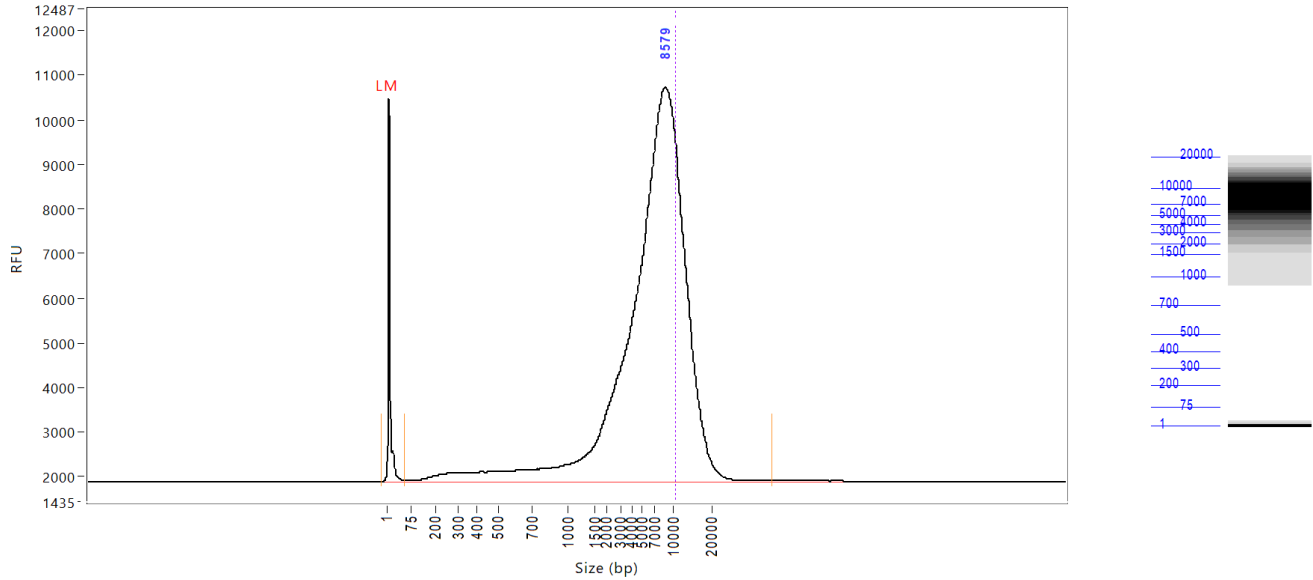

| Peak         | Size (bp) | Conc. (ng/uL) | From (bp) | To (bp) | Avg. Size (bp) | CV%    | RFU  | Corr. Peak Area |
|--------------|-----------|---------------|-----------|---------|----------------|--------|------|-----------------|
| 1            | 1 (LM)    | 0.0328        | 0         | 54      | 3              | 283.33 | 8597 | 60.022          |
| 2            | 8579      | 6.7014        | 54        | 35790   | 7069           | 61.73  | 8831 | 1021.830        |
| TIC:         |           | 6.7014        | ng/uL     |         |                |        |      |                 |
| TIM:         |           | 1.5607        | nmole/L   |         |                |        |      |                 |
| Total Conc.: |           | 6.7278        | ng/uL     |         |                |        |      |                 |
| GQN:         |           | 2.2           |           |         |                |        |      |                 |

Sample Peak Width (sec): 50    Sample Min Peak Height: 50    Sample Baseline V to V?: Y    Sample Baseline V to V pts: 3  
Sample Filter: Binomial    # of Pts for Filter: 3    Sample Start Region (min): 0    Sample End Region (min): 50  
Manual Baseline Start (min): 6    Manual Baseline End (min): 48  
Marker Peak Width (sec): 5    Marker Min Peak Height: 200    Marker Baseline V to V?: Y    Marker Baseline V to V pts: 3  
Lower Marker Selection: First Peak > 200 RFU    Upper Marker Selection: Last Peak > 200 RFU  
Ladder Size (bp): 1, 75, 200, 300, 400, 500, 700, 1000, 1500, 2000, 3000, 4000, 5000, 7000, 10000, 20000  
Quantification Using: Ladder    Final Concentration (ng/uL): 1.0417    Dilution Factor: 12.0  
Size Threshold (b.p.): 10000

**Data File:** 2019 06 18 13H 16M.raw  
**Sample:** 103613-001-084 (20x dil.)  
**Well Location:** D11

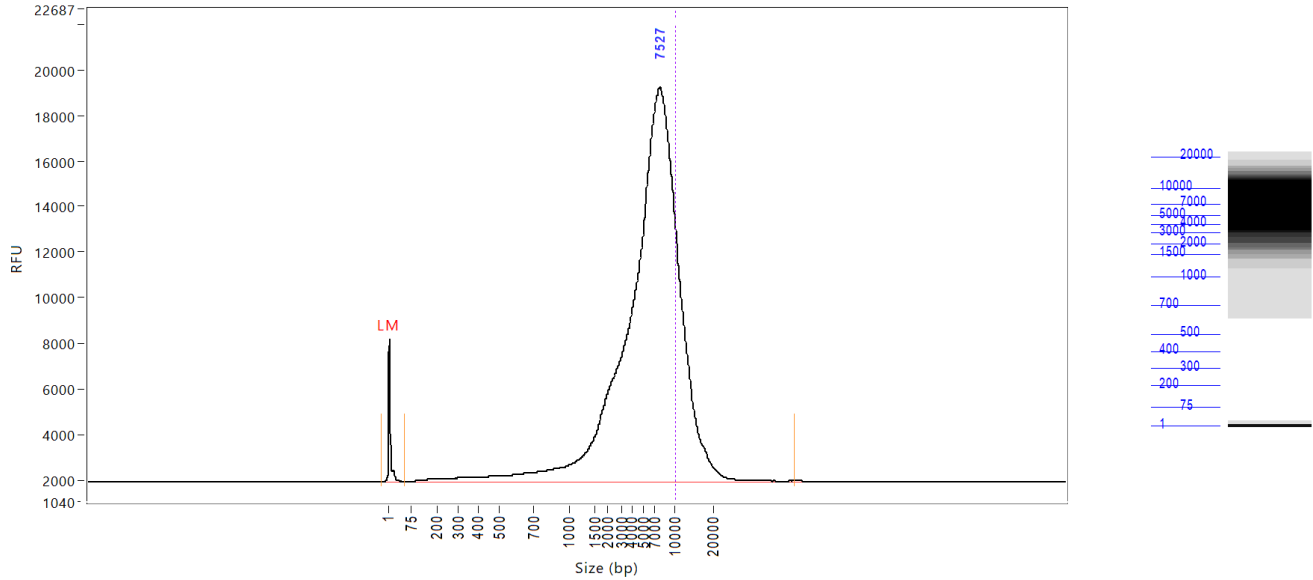

| Peak         | Size (bp) | Conc. (ng/uL) | From (bp) | To (bp) | Avg. Size (bp) | CV%    | RFU   | Corr. Peak Area |
|--------------|-----------|---------------|-----------|---------|----------------|--------|-------|-----------------|
| 1            | 1 (LM)    | 0.0328        | 0         | 52      | 2              | 315.00 | 6245  | 43.060          |
| 2            | 7527      | 16.7949       | 52        | 41485   | 6567           | 61.80  | 17300 | 1837.206        |
| TIC:         |           | 16.7949       | ng/uL     |         |                |        |       |                 |
| TIM:         |           | 4.2104        | nmole/L   |         |                |        |       |                 |
| Total Conc.: |           | 16.8271       | ng/uL     |         |                |        |       |                 |
| GQN:         |           | 1.6           |           |         |                |        |       |                 |

Sample Peak Width (sec): 50    Sample Min Peak Height: 50    Sample Baseline V to V?: Y    Sample Baseline V to V pts: 3  
Sample Filter: Binomial    # of Pts for Filter: 3    Sample Start Region (min): 0    Sample End Region (min): 50  
Manual Baseline Start (min): 6    Manual Baseline End (min): 48  
Marker Peak Width (sec): 5    Marker Min Peak Height: 200    Marker Baseline V to V?: Y    Marker Baseline V to V pts: 3  
Lower Marker Selection: First Peak > 200 RFU    Upper Marker Selection: Last Peak > 200 RFU  
Ladder Size (bp): 1, 75, 200, 300, 400, 500, 700, 1000, 1500, 2000, 3000, 4000, 5000, 7000, 10000, 20000  
Quantification Using: Ladder    Final Concentration (ng/uL): 1.0417    Dilution Factor: 12.0  
Size Threshold (b.p.): 10000

**Data File:** 2019 06 18 13H 16M.raw  
**Sample:** 103613-001-085 (20x dil.)  
**Well Location:** E11

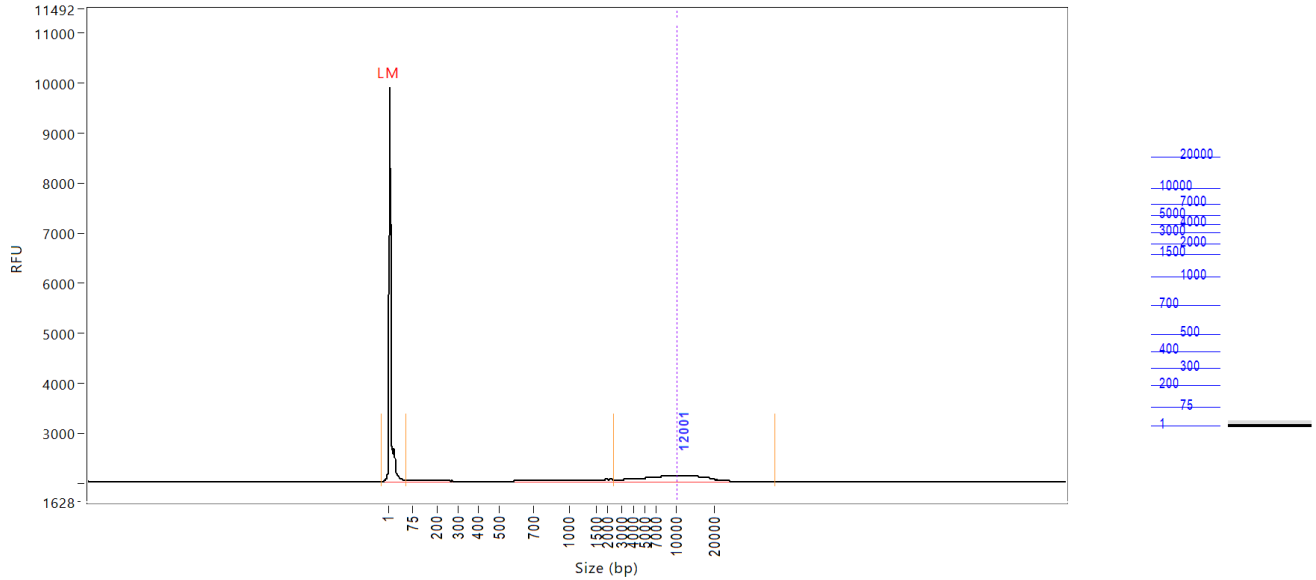

| Peak         | Size (bp) | Conc. (ng/uL) | From (bp) | To (bp) | Avg. Size (bp) | CV%    | RFU  | Corr. Peak Area |
|--------------|-----------|---------------|-----------|---------|----------------|--------|------|-----------------|
| 1            | 1 (LM)    | 0.0328        | 0         | 53      | 2              | 375.32 | 7881 | 55.810          |
| 2            | 12001     | 0.1329        | 2310      | 35963   | 10688          | 54.42  | 120  | 18.841          |
| TIC:         |           | 0.1329        | ng/uL     |         |                |        |      |                 |
| TIM:         |           | 0.0205        | nmole/L   |         |                |        |      |                 |
| Total Conc.: |           | 0.2048        | ng/uL     |         |                |        |      |                 |
| GQN:         |           | 3.2           |           |         |                |        |      |                 |

Sample Peak Width (sec): 50    Sample Min Peak Height: 50    Sample Baseline V to V?: Y    Sample Baseline V to V pts: 3  
Sample Filter: Binomial    # of Pts for Filter: 3    Sample Start Region (min): 0    Sample End Region (min): 50  
Manual Baseline Start (min): 6    Manual Baseline End (min): 48  
Marker Peak Width (sec): 5    Marker Min Peak Height: 200    Marker Baseline V to V?: Y    Marker Baseline V to V pts: 3  
Lower Marker Selection: First Peak > 200 RFU    Upper Marker Selection: Last Peak > 200 RFU  
Ladder Size (bp): 1, 75, 200, 300, 400, 500, 700, 1000, 1500, 2000, 3000, 4000, 5000, 7000, 10000, 20000  
Quantification Using: Ladder    Final Concentration (ng/uL): 1.0417    Dilution Factor: 12.0  
Size Threshold (b.p.): 10000

**Data File:** 2019 06 18 13H 16M.raw  
**Sample:** 103613-001-086 (20x dil.)  
**Well Location:** F11

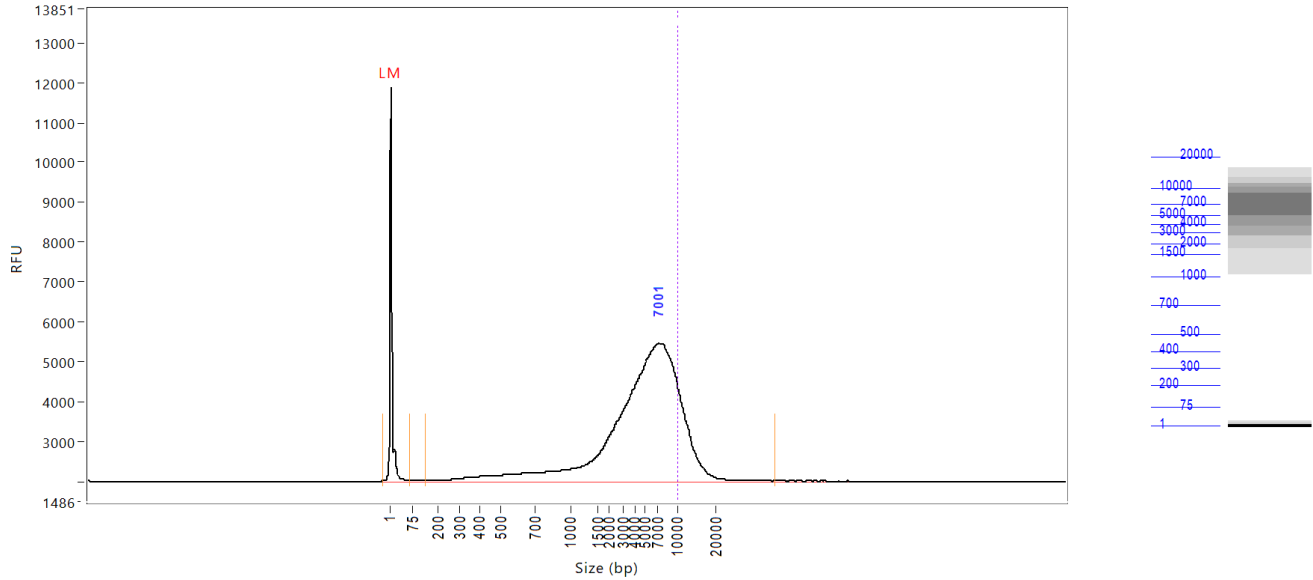

| Peak         | Size (bp) | Conc. (ng/uL) | From (bp) | To (bp) | Avg. Size (bp) | CV%    | RFU  | Corr. Peak Area |
|--------------|-----------|---------------|-----------|---------|----------------|--------|------|-----------------|
| 1            | 1 (LM)    | 0.0328        | 0         | 64      | 3              | 282.89 | 9874 | 69.253          |
| 2            | 7001      | 2.6811        | 139       | 35359   | 5711           | 71.43  | 3470 | 471.682         |
| TIC:         |           | 2.6811        | ng/uL     |         |                |        |      |                 |
| TIM:         |           | 0.7729        | nmole/L   |         |                |        |      |                 |
| Total Conc.: |           | 2.7210        | ng/uL     |         |                |        |      |                 |
| GQN:         |           | 1.3           |           |         |                |        |      |                 |

Sample Peak Width (sec): 50    Sample Min Peak Height: 50    Sample Baseline V to V?: Y    Sample Baseline V to V pts: 3  
Sample Filter: Binomial    # of Pts for Filter: 3    Sample Start Region (min): 0    Sample End Region (min): 50  
Manual Baseline Start (min): 6    Manual Baseline End (min): 48  
Marker Peak Width (sec): 5    Marker Min Peak Height: 200    Marker Baseline V to V?: Y    Marker Baseline V to V pts: 3  
Lower Marker Selection: First Peak > 200 RFU    Upper Marker Selection: Last Peak > 200 RFU  
Ladder Size (bp): 1, 75, 200, 300, 400, 500, 700, 1000, 1500, 2000, 3000, 4000, 5000, 7000, 10000, 20000  
Quantification Using: Ladder    Final Concentration (ng/uL): 1.0417    Dilution Factor: 12.0  
Size Threshold (b.p.): 10000

**Data File:** 2019 06 18 13H 16M.raw  
**Sample:** 103613-001-087 (20x dil.)  
**Well Location:** G11

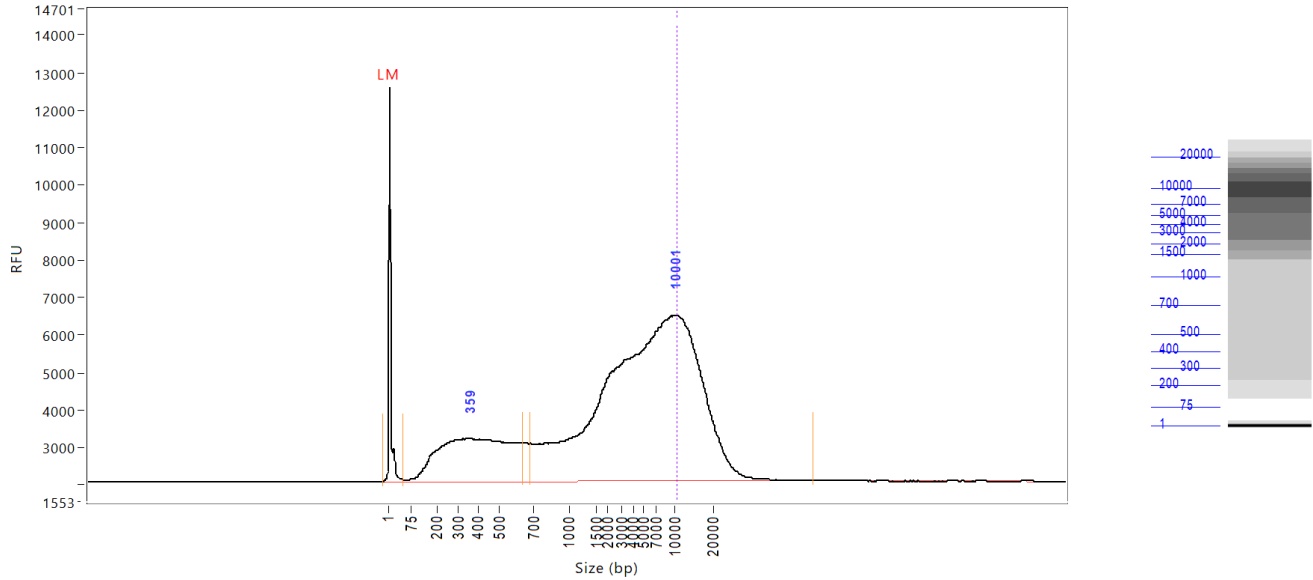

| Peak         | Size (bp) | Conc. (ng/uL) | From (bp) | To (bp) | Avg. Size (bp) | CV%    | RFU   | Corr. Peak Area |
|--------------|-----------|---------------|-----------|---------|----------------|--------|-------|-----------------|
| 1            | 1 (LM)    | 0.0328        | 0         | 46      | 2              | 270.92 | 10501 | 72.250          |
| 2            | 359       | 1.4282        | 46        | 630     | 367            | 38.03  | 1120  | 262.129         |
| 3            | 10001     | 5.4513        | 671       | 46403   | 7061           | 84.19  | 4401  | 1000.550        |
| TIC:         |           | 6.8794        | ng/uL     |         |                |        |       |                 |
| TIM:         |           | 7.6731        | nmole/L   |         |                |        |       |                 |
| Total Conc.: |           | 6.9641        | ng/uL     |         |                |        |       |                 |
| GQN:         |           | 2.0           |           |         |                |        |       |                 |

Sample Peak Width (sec): 50    Sample Min Peak Height: 50    Sample Baseline V to V?: Y    Sample Baseline V to V pts: 3  
Sample Filter: Binomial    # of Pts for Filter: 3    Sample Start Region (min): 0    Sample End Region (min): 50  
Manual Baseline Start (min): 6    Manual Baseline End (min): 48  
Marker Peak Width (sec): 5    Marker Min Peak Height: 200    Marker Baseline V to V?: Y    Marker Baseline V to V pts: 3  
Lower Marker Selection: First Peak > 200 RFU    Upper Marker Selection: Last Peak > 200 RFU  
Ladder Size (bp): 1, 75, 200, 300, 400, 500, 700, 1000, 1500, 2000, 3000, 4000, 5000, 7000, 10000, 20000  
Quantification Using: Ladder    Final Concentration (ng/uL): 1.0417    Dilution Factor: 12.0  
Size Threshold (b.p.): 10000

**Data File:** 2019 06 18 13H 16M.raw  
**Sample:** 103613-001-088 (20x dil.)  
**Well Location:** H11

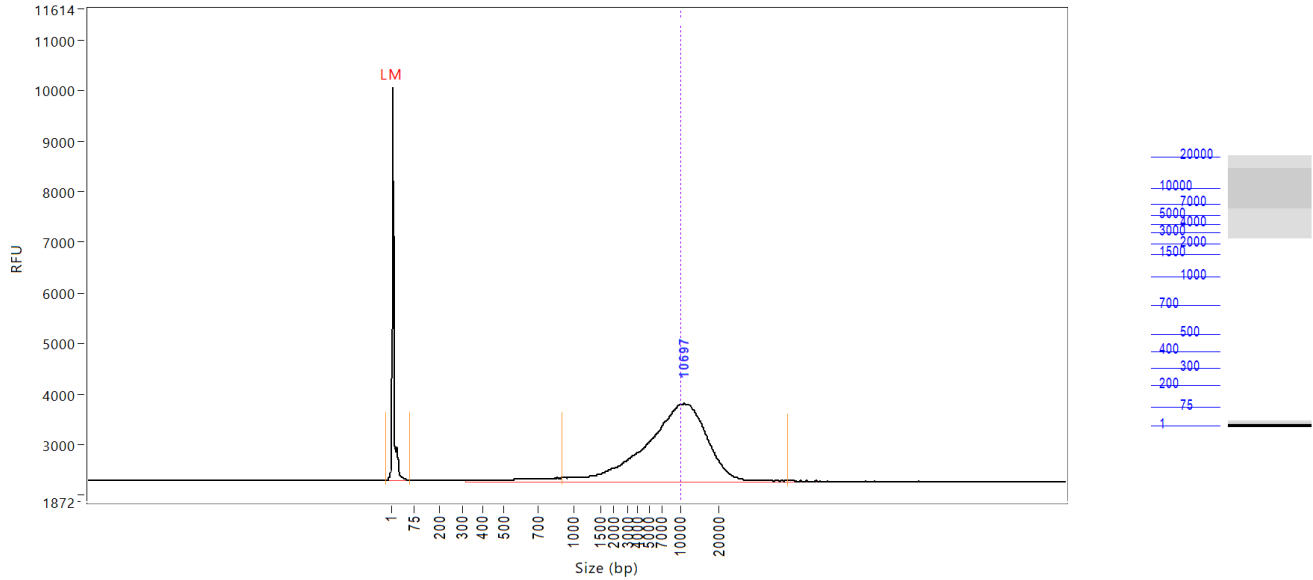

| Peak         | Size (bp) | Conc. (ng/uL) | From (bp) | To (bp) | Avg. Size (bp) | CV%    | RFU  | Corr. Peak Area |
|--------------|-----------|---------------|-----------|---------|----------------|--------|------|-----------------|
| 1            | 1 (LM)    | 0.0328        | 0         | 59      | 3              | 262.91 | 7772 | 55.043          |
| 2            | 10697     | 1.5150        | 902       | 37602   | 9451           | 56.88  | 1533 | 211.843         |
| TIC:         |           | 1.5150        | ng/uL     |         |                |        |      |                 |
| TIM:         |           | 0.2639        | nmole/L   |         |                |        |      |                 |
| Total Conc.: |           | 1.6095        | ng/uL     |         |                |        |      |                 |
| GQN:         |           | 4.0           |           |         |                |        |      |                 |

Sample Peak Width (sec): 50    Sample Min Peak Height: 50    Sample Baseline V to V?: Y    Sample Baseline V to V pts: 3  
Sample Filter: Binomial    # of Pts for Filter: 3    Sample Start Region (min): 0    Sample End Region (min): 50  
Manual Baseline Start (min): 6    Manual Baseline End (min): 48  
Marker Peak Width (sec): 5    Marker Min Peak Height: 200    Marker Baseline V to V?: Y    Marker Baseline V to V pts: 3  
Lower Marker Selection: First Peak > 200 RFU    Upper Marker Selection: Last Peak > 200 RFU  
Ladder Size (bp): 1, 75, 200, 300, 400, 500, 700, 1000, 1500, 2000, 3000, 4000, 5000, 7000, 10000, 20000  
Quantification Using: Ladder    Final Concentration (ng/uL): 1.0417    Dilution Factor: 12.0  
Size Threshold (b.p.): 10000



**Data File:** 2019 06 18 13H 16M.raw  
**Sample:** 103613-001-089 (20x dil.)  
**Well Location:** A12

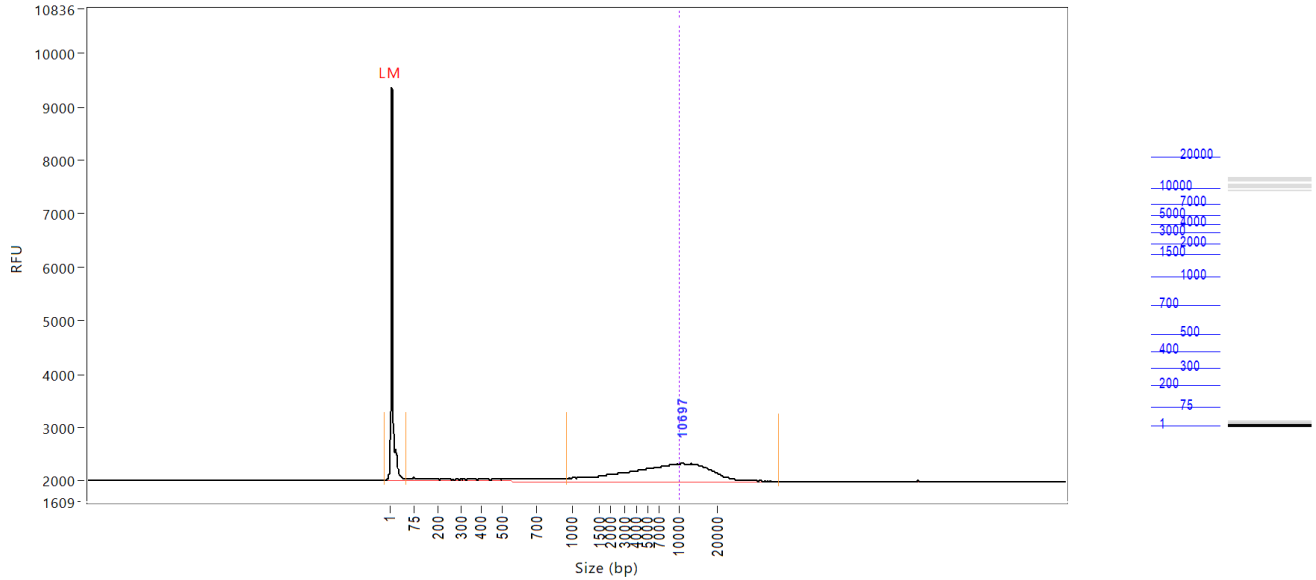

| Peak         | Size (bp) | Conc. (ng/uL) | From (bp) | To (bp) | Avg. Size (bp) | CV%    | RFU  | Corr. Peak Area |
|--------------|-----------|---------------|-----------|---------|----------------|--------|------|-----------------|
| 1            | 1 (LM)    | 0.0328        | 0         | 46      | 3              | 251.85 | 7360 | 52.402          |
| 2            | 10697     | 0.4756        | 944       | 35876   | 8872           | 69.25  | 335  | 63.314          |
| TIC:         |           | 0.4756        | ng/uL     |         |                |        |      |                 |
| TIM:         |           | 0.0883        | nmole/L   |         |                |        |      |                 |
| Total Conc.: |           | 0.5975        | ng/uL     |         |                |        |      |                 |
| GQN:         |           | 3.1           |           |         |                |        |      |                 |

Sample Peak Width (sec): 50    Sample Min Peak Height: 50    Sample Baseline V to V?: Y    Sample Baseline V to V pts: 3  
Sample Filter: Binomial    # of Pts for Filter: 3    Sample Start Region (min): 0    Sample End Region (min): 50  
Manual Baseline Start (min): 6    Manual Baseline End (min): 48  
Marker Peak Width (sec): 5    Marker Min Peak Height: 200    Marker Baseline V to V?: Y    Marker Baseline V to V pts: 3  
Lower Marker Selection: First Peak > 200 RFU    Upper Marker Selection: Last Peak > 200 RFU  
Ladder Size (bp): 1, 75, 200, 300, 400, 500, 700, 1000, 1500, 2000, 3000, 4000, 5000, 7000, 10000, 20000  
Quantification Using: Ladder    Final Concentration (ng/uL): 1.0417    Dilution Factor: 12.0  
Size Threshold (b.p.): 10000

**Data File:** 2019 06 18 13H 16M.raw  
**Sample:** 103613-001-090 (20x dil.)  
**Well Location:** B12

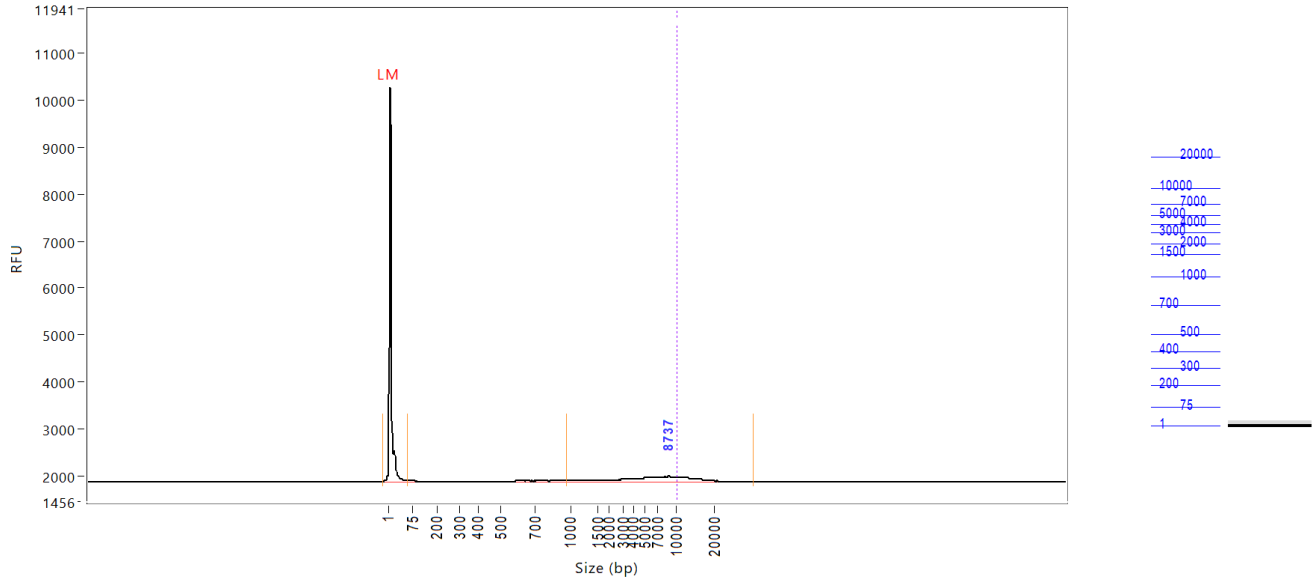

| Peak         | Size (bp) | Conc. (ng/uL) | From (bp) | To (bp) | Avg. Size (bp) | CV%    | RFU  | Corr. Peak Area |
|--------------|-----------|---------------|-----------|---------|----------------|--------|------|-----------------|
| 1            | 1 (LM)    | 0.0328        | 0         | 54      | 2              | 364.65 | 8384 | 59.169          |
| 2            | 8737      | 0.1167        | 969       | 30268   | 7501           | 69.37  | 111  | 17.540          |
| TIC:         |           | 0.1167        | ng/uL     |         |                |        |      |                 |
| TIM:         |           | 0.0256        | nmole/L   |         |                |        |      |                 |
| Total Conc.: |           | 0.1545        | ng/uL     |         |                |        |      |                 |
| GQN:         |           | 2.1           |           |         |                |        |      |                 |

Sample Peak Width (sec): 50    Sample Min Peak Height: 50    Sample Baseline V to V?: Y    Sample Baseline V to V pts: 3  
Sample Filter: Binomial    # of Pts for Filter: 3    Sample Start Region (min): 0    Sample End Region (min): 50  
Manual Baseline Start (min): 6    Manual Baseline End (min): 48  
Marker Peak Width (sec): 5    Marker Min Peak Height: 200    Marker Baseline V to V?: Y    Marker Baseline V to V pts: 3  
Lower Marker Selection: First Peak > 200 RFU    Upper Marker Selection: Last Peak > 200 RFU  
Ladder Size (bp): 1, 75, 200, 300, 400, 500, 700, 1000, 1500, 2000, 3000, 4000, 5000, 7000, 10000, 20000  
Quantification Using: Ladder    Final Concentration (ng/uL): 1.0417    Dilution Factor: 12.0  
Size Threshold (b.p.): 10000

**Data File:** 2019 06 18 13H 16M.raw  
**Sample:** 103613-001-091 (20x dil.)  
**Well Location:** C12

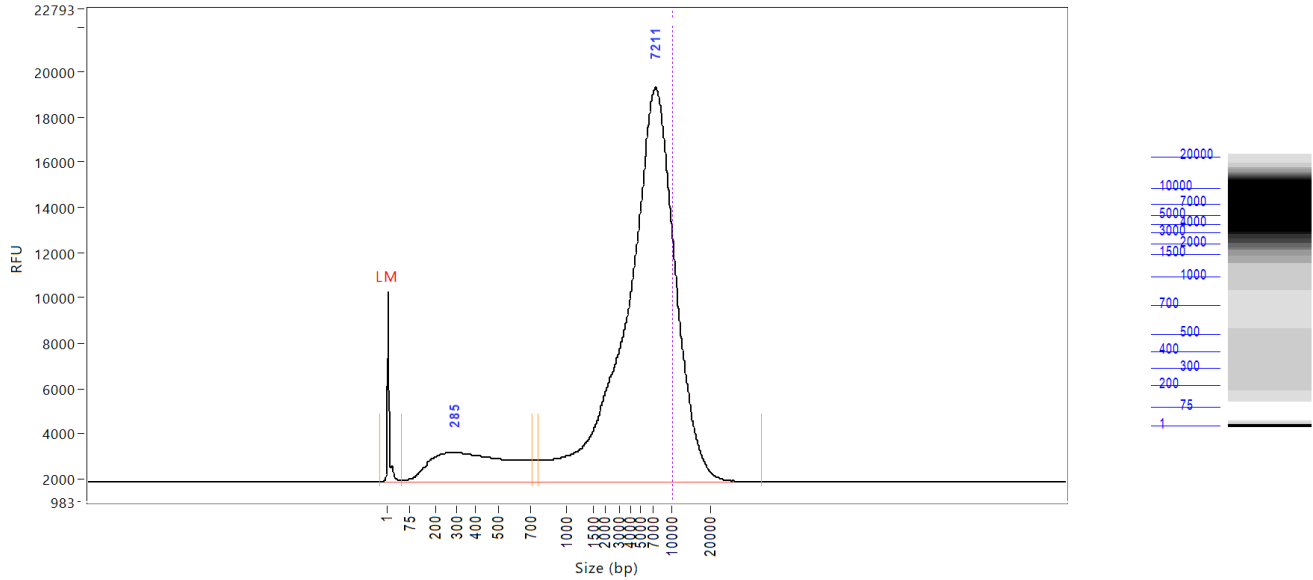

| Peak         | Size (bp) | Conc. (ng/uL) | From (bp) | To (bp) | Avg. Size (bp) | CV%    | RFU   | Corr. Peak Area |
|--------------|-----------|---------------|-----------|---------|----------------|--------|-------|-----------------|
| 1            | 1 (LM)    | 0.0328        | 0         | 46      | 3              | 247.86 | 8387  | 59.915          |
| 2            | 285       | 2.0884        | 46        | 707     | 374            | 43.51  | 1274  | 317.868         |
| 3            | 7211      | 11.9762       | 751       | 33719   | 6441           | 57.91  | 17438 | 1822.872        |
| TIC:         |           | 14.0646       | ng/uL     |         |                |        |       |                 |
| TIM:         |           | 12.2478       | nmole/L   |         |                |        |       |                 |
| Total Conc.: |           | 14.1562       | ng/uL     |         |                |        |       |                 |
| GQN:         |           | 1.2           |           |         |                |        |       |                 |

Sample Peak Width (sec): 50    Sample Min Peak Height: 50    Sample Baseline V to V?: Y    Sample Baseline V to V pts: 3  
Sample Filter: Binomial    # of Pts for Filter: 3    Sample Start Region (min): 0    Sample End Region (min): 50  
Manual Baseline Start (min): 6    Manual Baseline End (min): 48  
Marker Peak Width (sec): 5    Marker Min Peak Height: 200    Marker Baseline V to V?: Y    Marker Baseline V to V pts: 3  
Lower Marker Selection: First Peak > 200 RFU    Upper Marker Selection: Last Peak > 200 RFU  
Ladder Size (bp): 1, 75, 200, 300, 400, 500, 700, 1000, 1500, 2000, 3000, 4000, 5000, 7000, 10000, 20000  
Quantification Using: Ladder    Final Concentration (ng/uL): 1.0417    Dilution Factor: 12.0  
Size Threshold (b.p.): 10000

**Data File:** 2019 06 18 13H 16M.raw  
**Sample:** 103613-001-092 (20x dil.)  
**Well Location:** D12

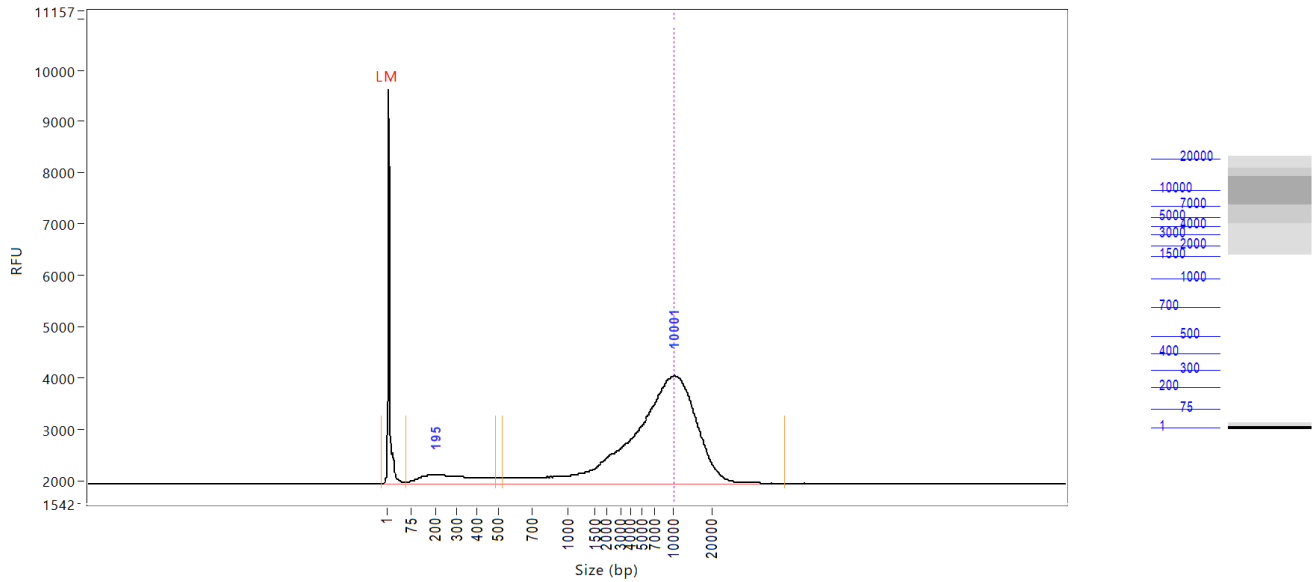

| Peak         | Size (bp) | Conc. (ng/uL) | From (bp) | To (bp) | Avg. Size (bp) | CV%    | RFU  | Corr. Peak Area |
|--------------|-----------|---------------|-----------|---------|----------------|--------|------|-----------------|
| 1            | 1 (LM)    | 0.0328        | 0         | 56      | 3              | 278.75 | 7687 | 53.677          |
| 2            | 195       | 0.2237        | 56        | 483     | 263            | 43.22  | 163  | 30.502          |
| 3            | 10001     | 2.2690        | 522       | 39155   | 8323           | 65.36  | 2112 | 309.404         |
| TIC:         |           | 2.4927        | ng/uL     |         |                |        |      |                 |
| TIM:         |           | 1.8477        | nmole/L   |         |                |        |      |                 |
| Total Conc.: |           | 2.5263        | ng/uL     |         |                |        |      |                 |
| GQN:         |           | 3.1           |           |         |                |        |      |                 |

Sample Peak Width (sec): 50    Sample Min Peak Height: 50    Sample Baseline V to V?: Y    Sample Baseline V to V pts: 3  
Sample Filter: Binomial    # of Pts for Filter: 3    Sample Start Region (min): 0    Sample End Region (min): 50  
Manual Baseline Start (min): 6    Manual Baseline End (min): 48  
Marker Peak Width (sec): 5    Marker Min Peak Height: 200    Marker Baseline V to V?: Y    Marker Baseline V to V pts: 3  
Lower Marker Selection: First Peak > 200 RFU    Upper Marker Selection: Last Peak > 200 RFU  
Ladder Size (bp): 1, 75, 200, 300, 400, 500, 700, 1000, 1500, 2000, 3000, 4000, 5000, 7000, 10000, 20000  
Quantification Using: Ladder    Final Concentration (ng/uL): 1.0417    Dilution Factor: 12.0  
Size Threshold (b.p.): 10000

**Data File:** 2019 06 18 13H 16M.raw  
**Sample:** 103613-001-093 (20x dil.)  
**Well Location:** E12

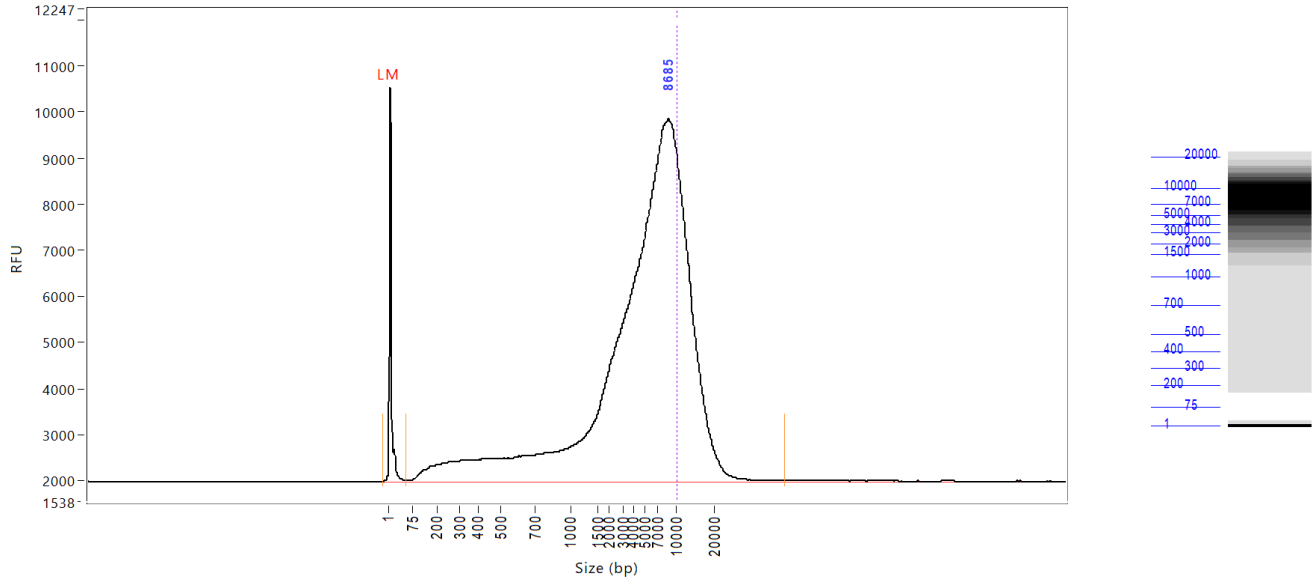

| Peak         | Size (bp) | Conc. (ng/uL) | From (bp) | To (bp) | Avg. Size (bp) | CV%    | RFU  | Corr. Peak Area |
|--------------|-----------|---------------|-----------|---------|----------------|--------|------|-----------------|
| 1            | 1 (LM)    | 0.0328        | 0         | 51      | 2              | 351.69 | 8558 | 59.862          |
| 2            | 8685      | 7.9380        | 51        | 38206   | 6170           | 77.84  | 7866 | 1207.153        |
| TIC:         |           | 7.9380        | ng/uL     |         |                |        |      |                 |
| TIM:         |           | 2.1180        | nmole/L   |         |                |        |      |                 |
| Total Conc.: |           | 7.9732        | ng/uL     |         |                |        |      |                 |
| GQN:         |           | 2.0           |           |         |                |        |      |                 |

Sample Peak Width (sec): 50    Sample Min Peak Height: 50    Sample Baseline V to V?: Y    Sample Baseline V to V pts: 3  
Sample Filter: Binomial    # of Pts for Filter: 3    Sample Start Region (min): 0    Sample End Region (min): 50  
Manual Baseline Start (min): 6    Manual Baseline End (min): 48  
Marker Peak Width (sec): 5    Marker Min Peak Height: 200    Marker Baseline V to V?: Y    Marker Baseline V to V pts: 3  
Lower Marker Selection: First Peak > 200 RFU    Upper Marker Selection: Last Peak > 200 RFU  
Ladder Size (bp): 1, 75, 200, 300, 400, 500, 700, 1000, 1500, 2000, 3000, 4000, 5000, 7000, 10000, 20000  
Quantification Using: Ladder    Final Concentration (ng/uL): 1.0417    Dilution Factor: 12.0  
Size Threshold (b.p.): 10000

**Data File:** 2019 06 18 13H 16M.raw  
**Sample:** 103613-001-094 (20x dil.)  
**Well Location:** F12

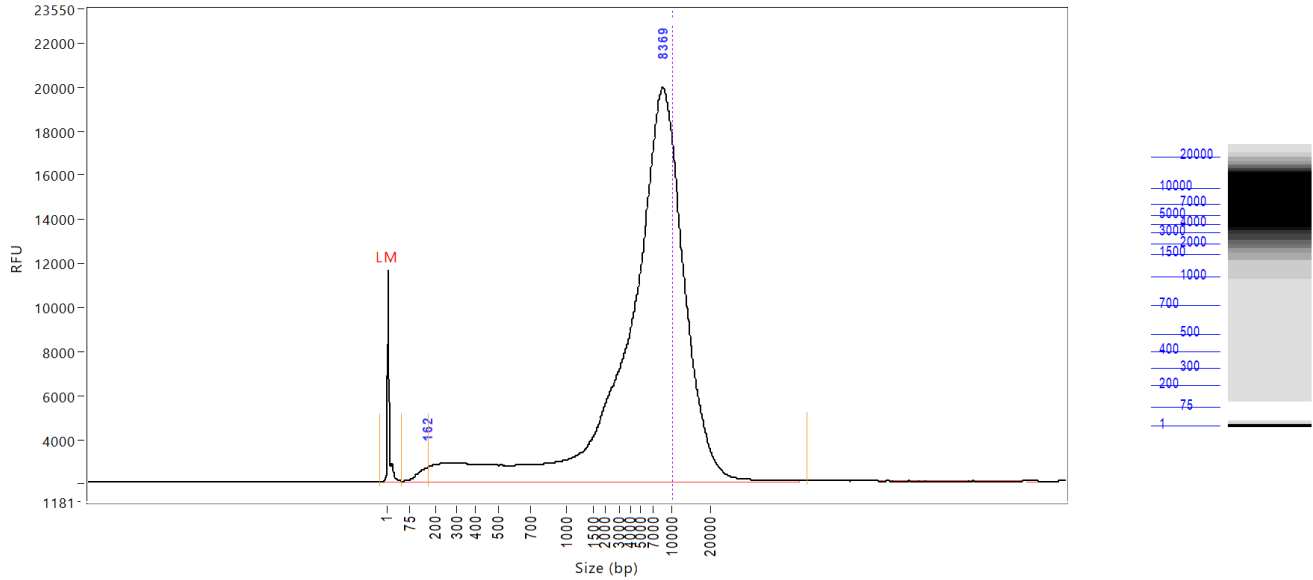

| Peak         | Size (bp) | Conc. (ng/uL) | From (bp) | To (bp) | Avg. Size (bp) | CV%    | RFU   | Corr. Peak Area |
|--------------|-----------|---------------|-----------|---------|----------------|--------|-------|-----------------|
| 1            | 1 (LM)    | 0.0328        | 0         | 46      | 3              | 244.55 | 9594  | 67.293          |
| 2            | 162       | 0.1396        | 46        | 164     | 125            | 22.29  | 693   | 23.873          |
| 3            | 8369      | 13.0397       | 164       | 45713   | 6912           | 70.60  | 17859 | 2229.174        |
| TIC:         |           | 13.1794       | ng/uL     |         |                |        |       |                 |
| TIM:         |           | 4.9413        | nmole/L   |         |                |        |       |                 |
| Total Conc.: |           | 13.1890       | ng/uL     |         |                |        |       |                 |
| GQN:         |           | 2.2           |           |         |                |        |       |                 |

Sample Peak Width (sec): 50    Sample Min Peak Height: 50    Sample Baseline V to V?: Y    Sample Baseline V to V pts: 3  
Sample Filter: Binomial    # of Pts for Filter: 3    Sample Start Region (min): 0    Sample End Region (min): 50  
Manual Baseline Start (min): 6    Manual Baseline End (min): 48  
Marker Peak Width (sec): 5    Marker Min Peak Height: 200    Marker Baseline V to V?: Y    Marker Baseline V to V pts: 3  
Lower Marker Selection: First Peak > 200 RFU    Upper Marker Selection: Last Peak > 200 RFU  
Ladder Size (bp): 1, 75, 200, 300, 400, 500, 700, 1000, 1500, 2000, 3000, 4000, 5000, 7000, 10000, 20000  
Quantification Using: Ladder    Final Concentration (ng/uL): 1.0417    Dilution Factor: 12.0  
Size Threshold (b.p.): 10000

**Data File:** 2019 06 18 13H 16M.raw  
**Sample:** 103613-001-095 (20x dil.)  
**Well Location:** G12

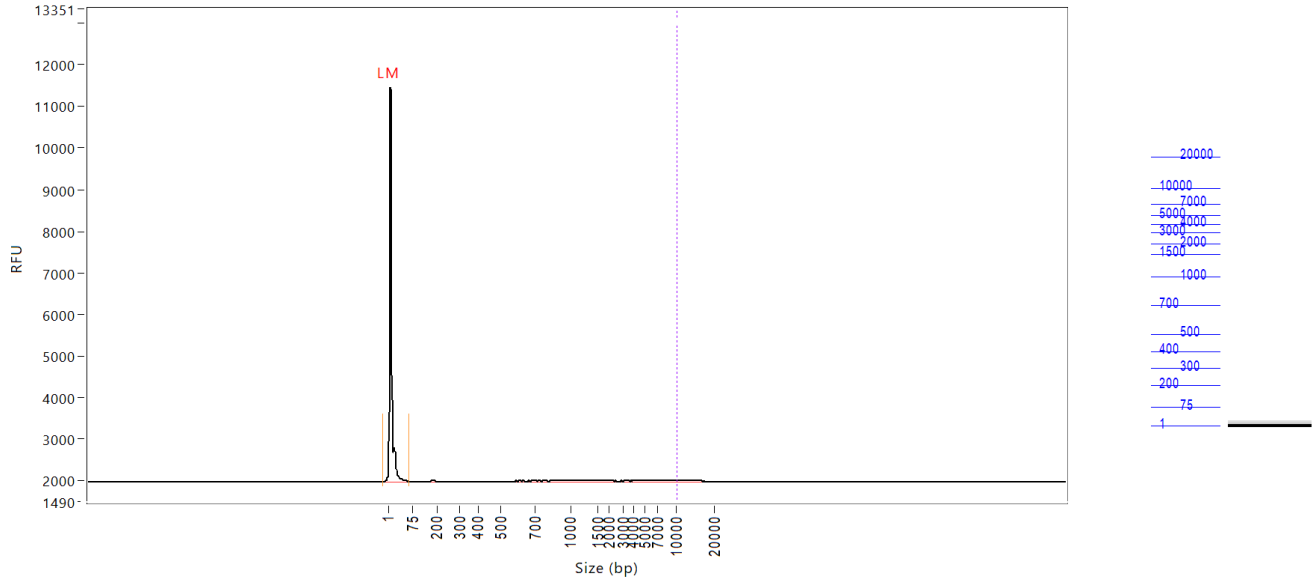

| Peak | Size (bp)    | Conc. (ng/uL) | From (bp) | To (bp) | Avg. Size (bp) | CV%    | RFU  | Corr. Peak Area |
|------|--------------|---------------|-----------|---------|----------------|--------|------|-----------------|
| 1    | 1 (LM)       | 0.0328        | 0         | 62      | 3              | 253.78 | 9481 | 67.743          |
|      | TIC:         | 0.0000        | ng/uL     |         |                |        |      |                 |
|      | TIM:         | 0.0000        | nmole/L   |         |                |        |      |                 |
|      | Total Conc.: | 0.0780        | ng/uL     |         |                |        |      |                 |
|      | GQN:         | 2.4           |           |         |                |        |      |                 |

Sample Peak Width (sec): 50    Sample Min Peak Height: 50    Sample Baseline V to V?: Y    Sample Baseline V to V pts: 3  
Sample Filter: Binomial    # of Pts for Filter: 3    Sample Start Region (min): 0    Sample End Region (min): 50  
Manual Baseline Start (min): 6    Manual Baseline End (min): 48  
Marker Peak Width (sec): 5    Marker Min Peak Height: 200    Marker Baseline V to V?: Y    Marker Baseline V to V pts: 3  
Lower Marker Selection: First Peak > 200 RFU    Upper Marker Selection: Last Peak > 200 RFU  
Ladder Size (bp): 1, 75, 200, 300, 400, 500, 700, 1000, 1500, 2000, 3000, 4000, 5000, 7000, 10000, 20000  
Quantification Using: Ladder    Final Concentration (ng/uL): 1.0417    Dilution Factor: 12.0  
Size Threshold (b.p.): 10000

Data File: 2019 06 18 13H 16M.raw

Sample: 103613-001-096 (20x dil.)

Well Location: H12

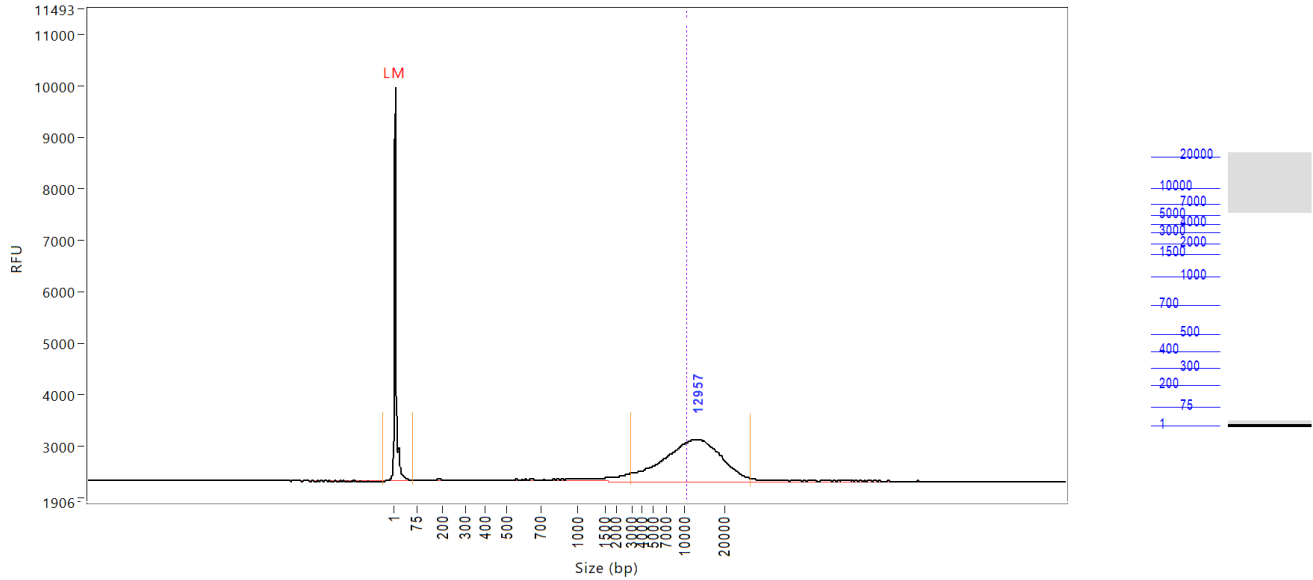

| Peak         | Size (bp) | Conc. (ng/uL) | From (bp) | To (bp) | Avg. Size (bp) | CV%    | RFU  | Corr. Peak Area |
|--------------|-----------|---------------|-----------|---------|----------------|--------|------|-----------------|
| 1            | 1 (LM)    | 0.0328        | 0         | 59      | 2              | 292.54 | 7644 | 52.892          |
| 2            | 12957     | 0.8468        | 2976      | 26816   | 12000          | 44.47  | 807  | 113.785         |
| TIC:         |           | 0.8468        | ng/uL     |         |                |        |      |                 |
| TIM:         |           | 0.1162        | nmole/L   |         |                |        |      |                 |
| Total Conc.: |           | 0.9735        | ng/uL     |         |                |        |      |                 |

Sample Peak Width (sec): 8    Sample Min Peak Height: 200    Sample Baseline V to V?: Y    Sample Baseline V to V pts: 3  
 Sample Filter: Binomial    # of Pts for Filter: 3    Sample Start Region (min): 0    Sample End Region (min): 50  
 Manual Baseline Start (min): 6    Manual Baseline End (min): 48  
 Marker Peak Width (sec): 5    Marker Min Peak Height: 200    Marker Baseline V to V?: Y    Marker Baseline V to V pts: 3  
 Lower Marker Selection: First Peak > 200 RFU    Upper Marker Selection: Last Peak > 200 RFU  
 Ladder Size (bp): 1, 75, 200, 300, 400, 500, 700, 1000, 1500, 2000, 3000, 4000, 5000, 7000, 10000, 20000  
 Quantification Using: Ladder    Final Concentration (ng/uL): 1.0417    Dilution Factor: 12.0  
 Size Threshold (b.p.): 10000



Data File: 2019 06 18 14H 35M.raw

Sample: 103613-001-097 (20x dil.)

Well Location: A1

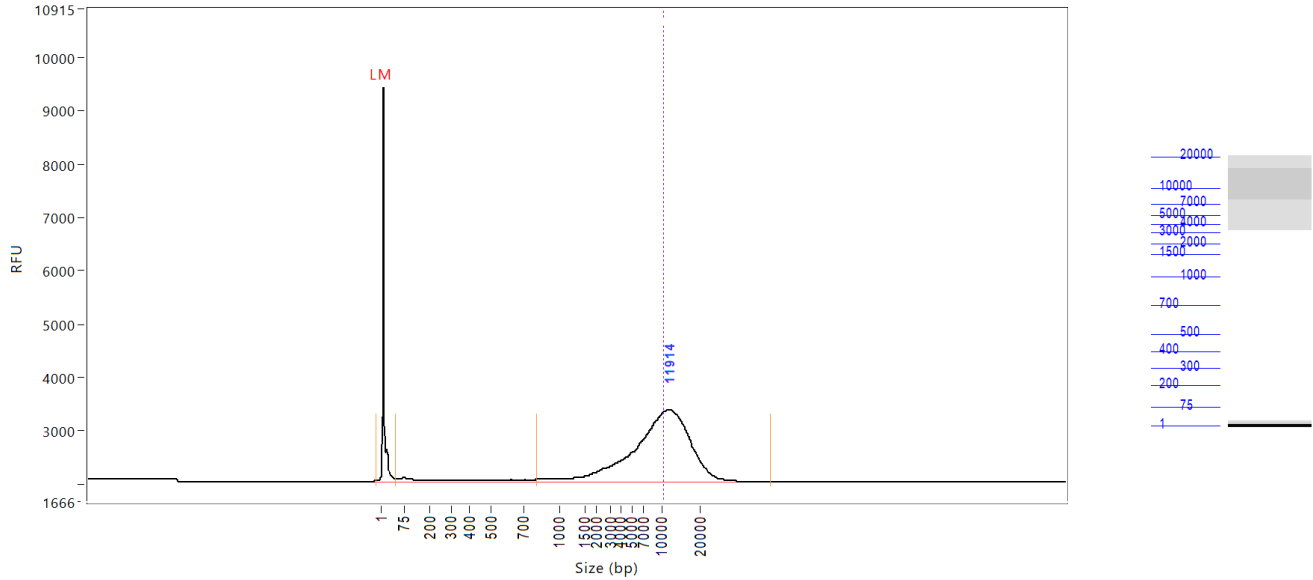

| Peak         | Size (bp) | Conc. (ng/uL) | From (bp) | To (bp) | Avg. Size (bp) | CV%    | RFU  | Corr. Peak Area |
|--------------|-----------|---------------|-----------|---------|----------------|--------|------|-----------------|
| 1            | 1 (LM)    | 0.0328        | 0         | 46      | 3              | 249.21 | 7390 | 53.009          |
| 2            | 11914     | 1.3483        | 807       | 38896   | 10067          | 54.80  | 1346 | 181.573         |
| TIC:         |           | 1.3483        | ng/uL     |         |                |        |      |                 |
| TIM:         |           | 0.2205        | nmole/L   |         |                |        |      |                 |
| Total Conc.: |           | 1.4657        | ng/uL     |         |                |        |      |                 |
| GQN:         |           | 4.3           |           |         |                |        |      |                 |

Sample Peak Width (sec): 50    Sample Min Peak Height: 50    Sample Baseline V to V?: Y    Sample Baseline V to V pts: 3  
 Sample Filter: Binomial    # of Pts for Filter: 3    Sample Start Region (min): 0    Sample End Region (min): 50  
 Manual Baseline Start (min): 6    Manual Baseline End (min): 48  
 Marker Peak Width (sec): 5    Marker Min Peak Height: 200    Marker Baseline V to V?: Y    Marker Baseline V to V pts: 3  
 Lower Marker Selection: First Peak > 200 RFU    Upper Marker Selection: Last Peak > 200 RFU  
 Ladder Size (bp): 1, 75, 200, 300, 400, 500, 700, 1000, 1500, 2000, 3000, 4000, 5000, 7000, 10000, 20000  
 Quantification Using: Ladder    Final Concentration (ng/uL): 1.0417    Dilution Factor: 12.0  
 Size Threshold (b.p.): 10000

Data File: 2019 06 18 14H 35M.raw

Sample: 103613-001-098 (20x dil.)

Well Location: B1

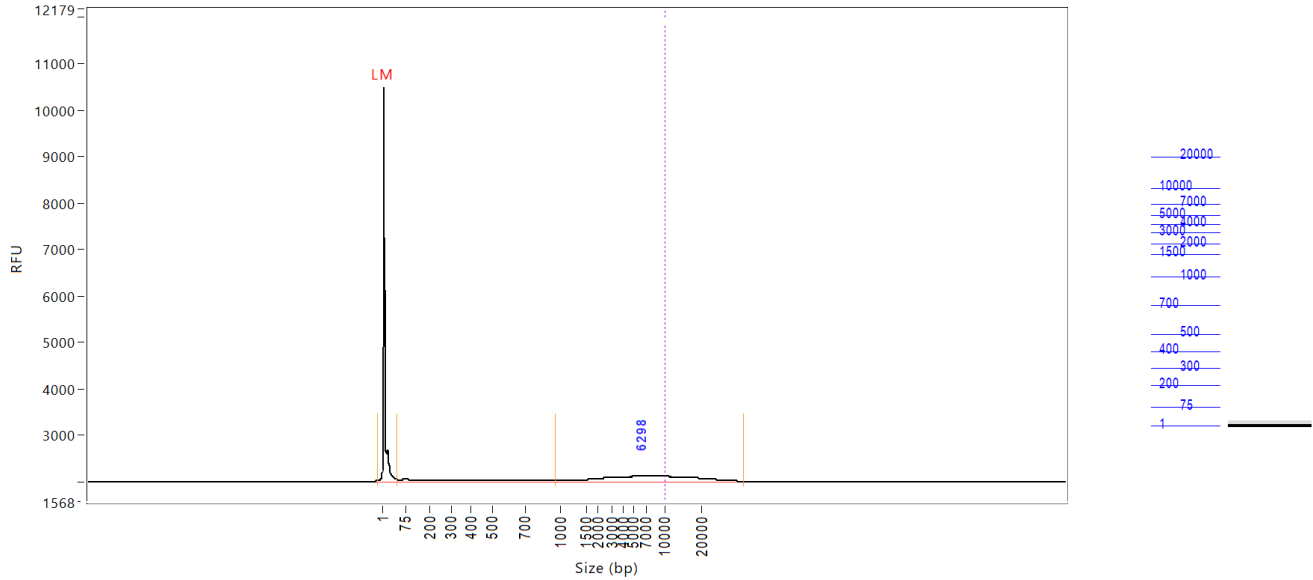

| Peak         | Size (bp) | Conc. (ng/uL) | From (bp) | To (bp) | Avg. Size (bp) | CV%    | RFU  | Corr. Peak Area |
|--------------|-----------|---------------|-----------|---------|----------------|--------|------|-----------------|
| 1            | 1 (LM)    | 0.0328        | 0         | 47      | 2              | 310.49 | 8478 | 58.950          |
| 2            | 6298      | 0.1938        | 950       | 31217   | 9011           | 78.47  | 123  | 29.023          |
| TIC:         |           | 0.1938        | ng/uL     |         |                |        |      |                 |
| TIM:         |           | 0.0354        | nmole/L   |         |                |        |      |                 |
| Total Conc.: |           | 0.3066        | ng/uL     |         |                |        |      |                 |
| GQN:         |           | 2.6           |           |         |                |        |      |                 |

Sample Peak Width (sec): 50    Sample Min Peak Height: 50    Sample Baseline V to V?: Y    Sample Baseline V to V pts: 3  
 Sample Filter: Binomial    # of Pts for Filter: 3    Sample Start Region (min): 0    Sample End Region (min): 50  
 Manual Baseline Start (min): 6    Manual Baseline End (min): 48  
 Marker Peak Width (sec): 5    Marker Min Peak Height: 200    Marker Baseline V to V?: Y    Marker Baseline V to V pts: 3  
 Lower Marker Selection: First Peak > 200 RFU    Upper Marker Selection: Last Peak > 200 RFU  
 Ladder Size (bp): 1, 75, 200, 300, 400, 500, 700, 1000, 1500, 2000, 3000, 4000, 5000, 7000, 10000, 20000  
 Quantification Using: Ladder    Final Concentration (ng/uL): 1.0417    Dilution Factor: 12.0  
 Size Threshold (b.p.): 10000

**Data File:** 2019 06 18 14H 35M.raw  
**Sample:** 103613-001-099 (20x dil.)  
**Well Location:** C1

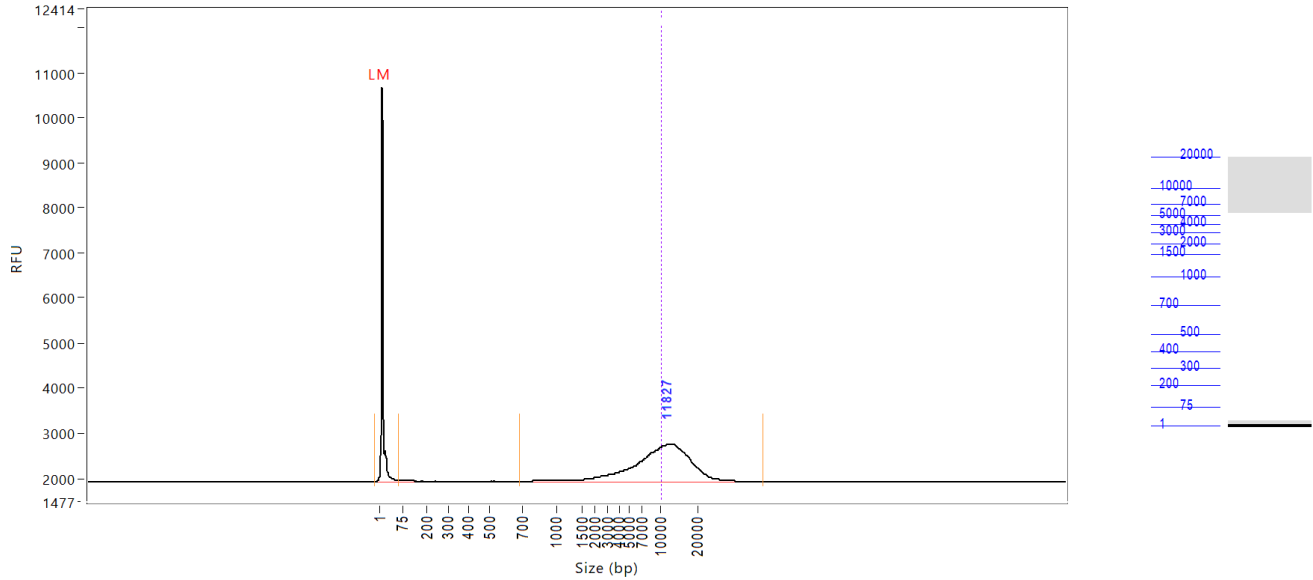

| Peak         | Size (bp) | Conc. (ng/uL) | From (bp) | To (bp) | Avg. Size (bp) | CV%    | RFU  | Corr. Peak Area |
|--------------|-----------|---------------|-----------|---------|----------------|--------|------|-----------------|
| 1            | 1 (LM)    | 0.0328        | 0         | 57      | 2              | 336.98 | 8747 | 61.198          |
| 2            | 11827     | 0.7416        | 688       | 38034   | 10778          | 54.18  | 829  | 115.298         |
| TIC:         |           | 0.7416        | ng/uL     |         |                |        |      |                 |
| TIM:         |           | 0.1133        | nmole/L   |         |                |        |      |                 |
| Total Conc.: |           | 0.7962        | ng/uL     |         |                |        |      |                 |
| GQN:         |           | 4.9           |           |         |                |        |      |                 |

Sample Peak Width (sec): 50    Sample Min Peak Height: 50    Sample Baseline V to V?: Y    Sample Baseline V to V pts: 3  
Sample Filter: Binomial    # of Pts for Filter: 3    Sample Start Region (min): 0    Sample End Region (min): 50  
Manual Baseline Start (min): 6    Manual Baseline End (min): 48  
Marker Peak Width (sec): 5    Marker Min Peak Height: 200    Marker Baseline V to V?: Y    Marker Baseline V to V pts: 3  
Lower Marker Selection: First Peak > 200 RFU    Upper Marker Selection: Last Peak > 200 RFU  
Ladder Size (bp): 1, 75, 200, 300, 400, 500, 700, 1000, 1500, 2000, 3000, 4000, 5000, 7000, 10000, 20000  
Quantification Using: Ladder    Final Concentration (ng/uL): 1.0417    Dilution Factor: 12.0  
Size Threshold (b.p.): 10000

**Data File:** 2019 06 18 14H 35M.raw  
**Sample:** 103613-001-100 (20x dil.)  
**Well Location:** D1

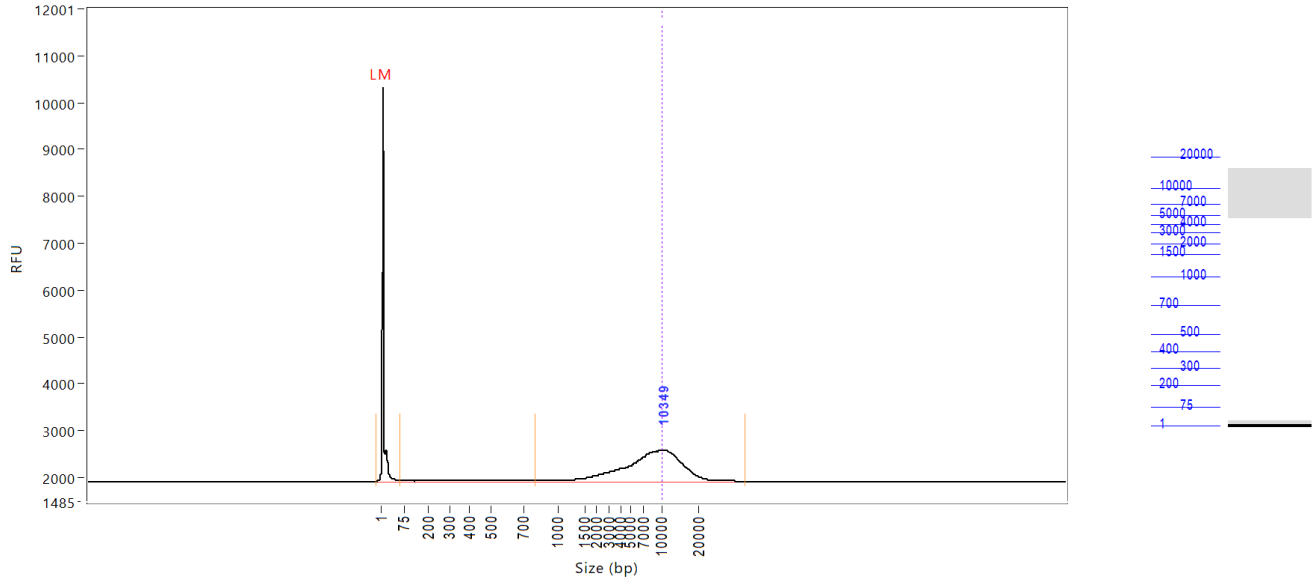

| Peak         | Size (bp) | Conc. (ng/uL) | From (bp) | To (bp) | Avg. Size (bp) | CV%    | RFU  | Corr. Peak Area |
|--------------|-----------|---------------|-----------|---------|----------------|--------|------|-----------------|
| 1            | 1 (LM)    | 0.0328        | 0         | 57      | 2              | 343.07 | 8408 | 58.824          |
| 2            | 10349     | 0.5912        | 804       | 32080   | 8714           | 58.62  | 674  | 88.353          |
| TIC:         |           | 0.5912        | ng/uL     |         |                |        |      |                 |
| TIM:         |           | 0.1117        | nmole/L   |         |                |        |      |                 |
| Total Conc.: |           | 0.6646        | ng/uL     |         |                |        |      |                 |
| GQN:         |           | 3.3           |           |         |                |        |      |                 |

Sample Peak Width (sec): 50    Sample Min Peak Height: 50    Sample Baseline V to V?: Y    Sample Baseline V to V pts: 3  
Sample Filter: Binomial    # of Pts for Filter: 3    Sample Start Region (min): 0    Sample End Region (min): 50  
Manual Baseline Start (min): 6    Manual Baseline End (min): 48  
Marker Peak Width (sec): 5    Marker Min Peak Height: 200    Marker Baseline V to V?: Y    Marker Baseline V to V pts: 3  
Lower Marker Selection: First Peak > 200 RFU    Upper Marker Selection: Last Peak > 200 RFU  
Ladder Size (bp): 1, 75, 200, 300, 400, 500, 700, 1000, 1500, 2000, 3000, 4000, 5000, 7000, 10000, 20000  
Quantification Using: Ladder    Final Concentration (ng/uL): 1.0417    Dilution Factor: 12.0  
Size Threshold (b.p.): 10000

Data File: 2019 06 18 14H 35M.raw

Sample: 103613-001-101 (20x dil.)

Well Location: E1

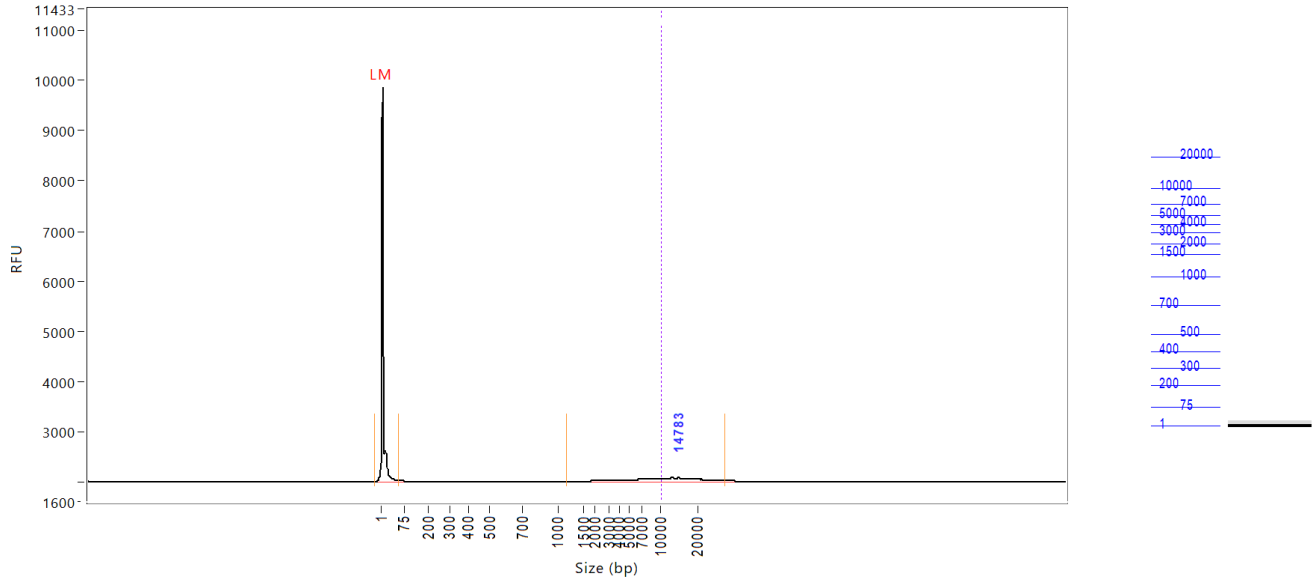

| Peak         | Size (bp) | Conc. (ng/uL) | From (bp) | To (bp) | Avg. Size (bp) | CV%    | RFU  | Corr. Peak Area |
|--------------|-----------|---------------|-----------|---------|----------------|--------|------|-----------------|
| 1            | 1 (LM)    | 0.0328        | 0         | 58      | 2              | 333.23 | 7864 | 55.421          |
| 2            | 14783     | 0.1062        | 1169      | 27248   | 11118          | 60.39  | 77   | 14.953          |
| TIC:         |           | 0.1062        | ng/uL     |         |                |        |      |                 |
| TIM:         |           | 0.0157        | nmole/L   |         |                |        |      |                 |
| Total Conc.: |           | 0.1635        | ng/uL     |         |                |        |      |                 |
| GQN:         |           | 4.2           |           |         |                |        |      |                 |

Sample Peak Width (sec): 50    Sample Min Peak Height: 50    Sample Baseline V to V?: Y    Sample Baseline V to V pts: 3  
 Sample Filter: Binomial    # of Pts for Filter: 3    Sample Start Region (min): 0    Sample End Region (min): 50  
 Manual Baseline Start (min): 6    Manual Baseline End (min): 48  
 Marker Peak Width (sec): 5    Marker Min Peak Height: 200    Marker Baseline V to V?: Y    Marker Baseline V to V pts: 3  
 Lower Marker Selection: First Peak > 200 RFU    Upper Marker Selection: Last Peak > 200 RFU  
 Ladder Size (bp): 1, 75, 200, 300, 400, 500, 700, 1000, 1500, 2000, 3000, 4000, 5000, 7000, 10000, 20000  
 Quantification Using: Ladder    Final Concentration (ng/uL): 1.0417    Dilution Factor: 12.0  
 Size Threshold (b.p.): 10000

**Data File:** 2019 06 18 14H 35M.raw  
**Sample:** 103613-001-102 (20x dil.)  
**Well Location:** F1

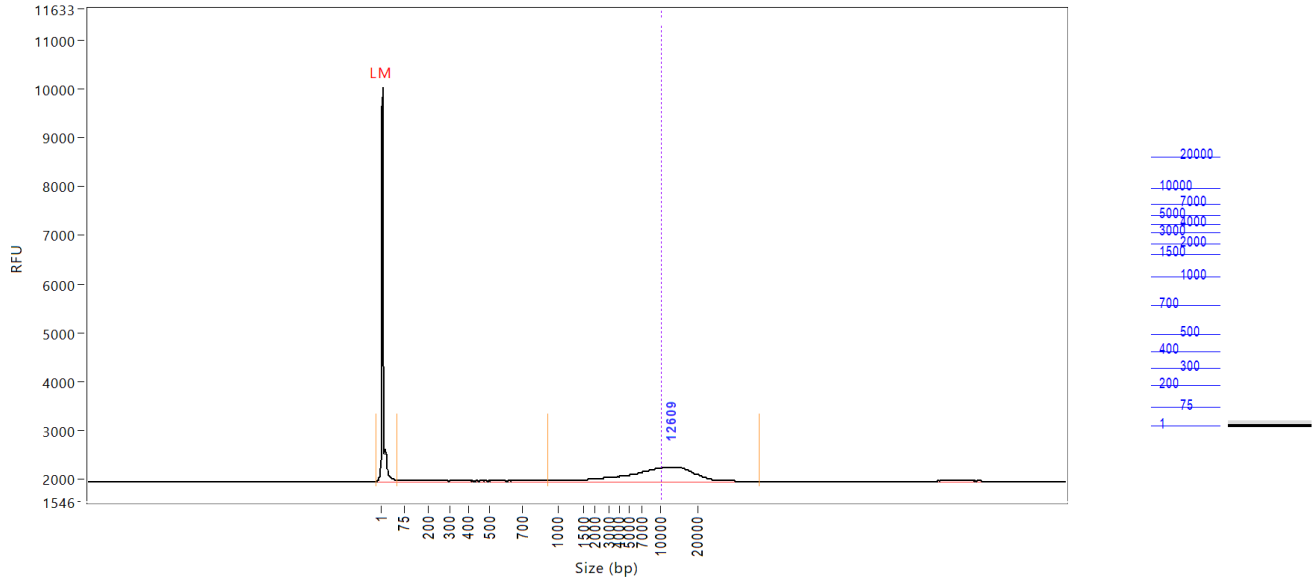

| Peak         | Size (bp) | Conc. (ng/uL) | From (bp) | To (bp) | Avg. Size (bp) | CV%    | RFU  | Corr. Peak Area |
|--------------|-----------|---------------|-----------|---------|----------------|--------|------|-----------------|
| 1            | 1 (LM)    | 0.0328        | 0         | 54      | 2              | 354.68 | 8065 | 56.716          |
| 2            | 12609     | 0.3388        | 916       | 36480   | 10497          | 59.79  | 303  | 48.815          |
| TIC:         |           | 0.3388        | ng/uL     |         |                |        |      |                 |
| TIM:         |           | 0.0531        | nmole/L   |         |                |        |      |                 |
| Total Conc.: |           | 0.4222        | ng/uL     |         |                |        |      |                 |
| GQN:         |           | 4.2           |           |         |                |        |      |                 |

Sample Peak Width (sec): 50    Sample Min Peak Height: 50    Sample Baseline V to V?: Y    Sample Baseline V to V pts: 3  
Sample Filter: Binomial    # of Pts for Filter: 3    Sample Start Region (min): 0    Sample End Region (min): 50  
Manual Baseline Start (min): 6    Manual Baseline End (min): 48  
Marker Peak Width (sec): 5    Marker Min Peak Height: 200    Marker Baseline V to V?: Y    Marker Baseline V to V pts: 3  
Lower Marker Selection: First Peak > 200 RFU    Upper Marker Selection: Last Peak > 200 RFU  
Ladder Size (bp): 1, 75, 200, 300, 400, 500, 700, 1000, 1500, 2000, 3000, 4000, 5000, 7000, 10000, 20000  
Quantification Using: Ladder    Final Concentration (ng/uL): 1.0417    Dilution Factor: 12.0  
Size Threshold (b.p.): 10000

**Data File:** 2019 06 18 14H 35M.raw  
**Sample:** 103613-001-103 (20x dil.)  
**Well Location:** G1

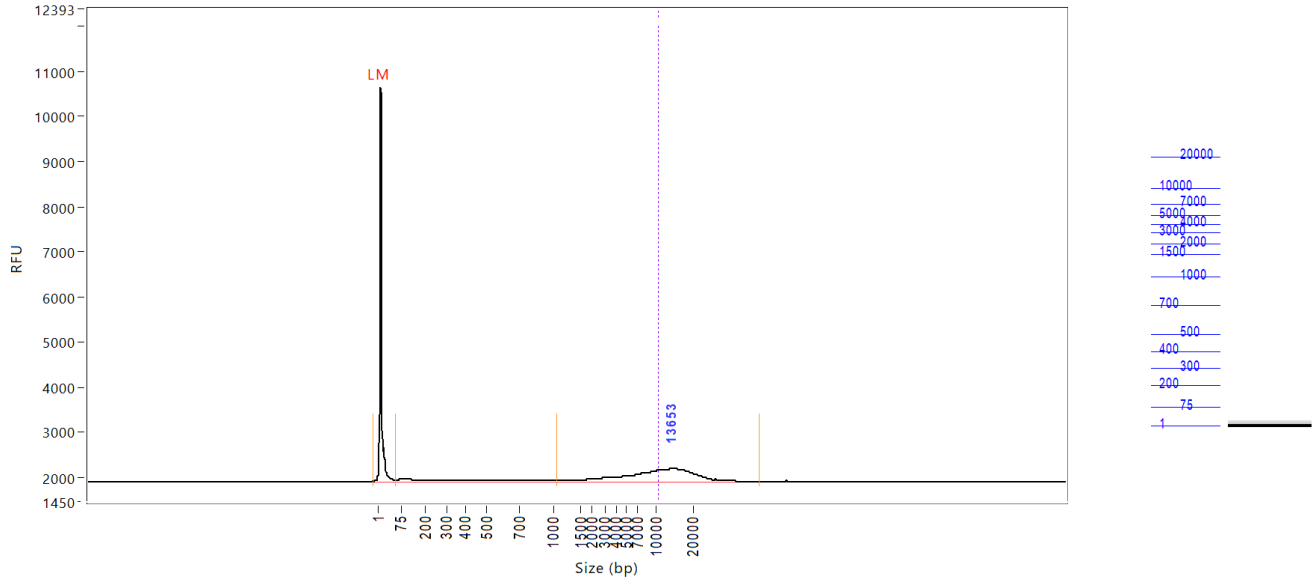

| Peak         | Size (bp) | Conc. (ng/uL) | From (bp) | To (bp) | Avg. Size (bp) | CV%    | RFU  | Corr. Peak Area |
|--------------|-----------|---------------|-----------|---------|----------------|--------|------|-----------------|
| 1            | 1 (LM)    | 0.0328        | 0         | 52      | 3              | 256.57 | 8743 | 62.491          |
| 2            | 13653     | 0.3150        | 1038      | 37861   | 11562          | 61.66  | 274  | 50.001          |
| TIC:         |           | 0.3150        | ng/uL     |         |                |        |      |                 |
| TIM:         |           | 0.0448        | nmole/L   |         |                |        |      |                 |
| Total Conc.: |           | 0.4098        | ng/uL     |         |                |        |      |                 |
| GQN:         |           | 4.4           |           |         |                |        |      |                 |

Sample Peak Width (sec): 50    Sample Min Peak Height: 50    Sample Baseline V to V?: Y    Sample Baseline V to V pts: 3  
Sample Filter: Binomial    # of Pts for Filter: 3    Sample Start Region (min): 0    Sample End Region (min): 50  
Manual Baseline Start (min): 6    Manual Baseline End (min): 48  
Marker Peak Width (sec): 5    Marker Min Peak Height: 200    Marker Baseline V to V?: Y    Marker Baseline V to V pts: 3  
Lower Marker Selection: First Peak > 200 RFU    Upper Marker Selection: Last Peak > 200 RFU  
Ladder Size (bp): 1, 75, 200, 300, 400, 500, 700, 1000, 1500, 2000, 3000, 4000, 5000, 7000, 10000, 20000  
Quantification Using: Ladder    Final Concentration (ng/uL): 1.0417    Dilution Factor: 12.0  
Size Threshold (b.p.): 10000

Data File: 2019 06 18 14H 35M.raw

Sample: 103613-001-104 (20x dil.)

Well Location: H1

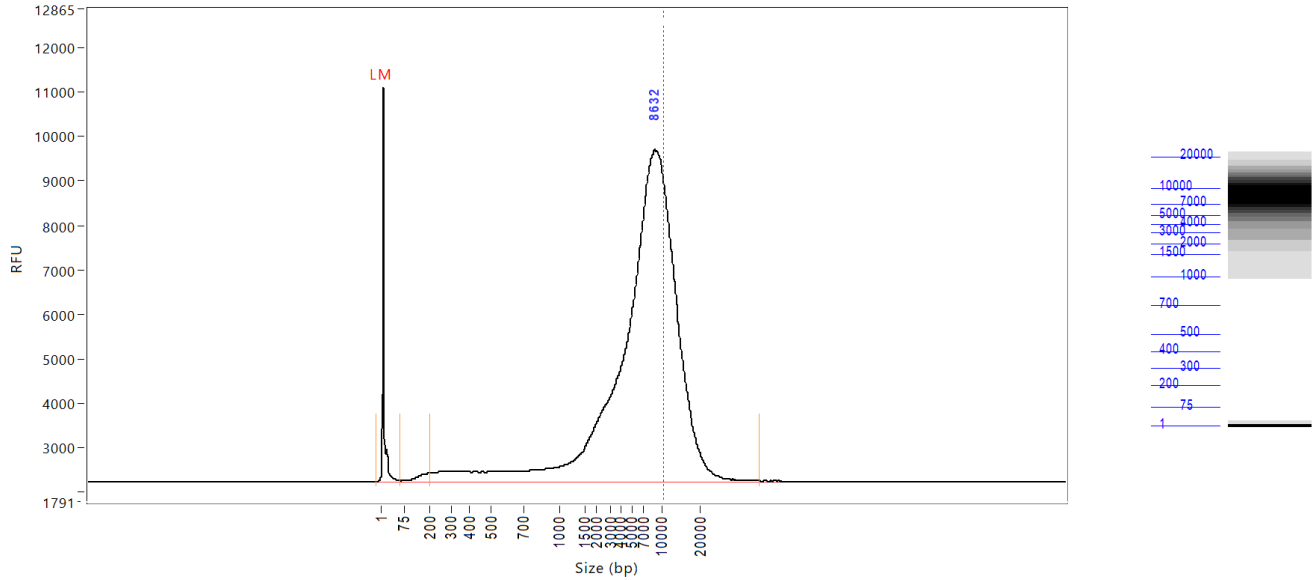

| Peak         | Size (bp) | Conc. (ng/uL) | From (bp) | To (bp) | Avg. Size (bp) | CV%    | RFU  | Corr. Peak Area |
|--------------|-----------|---------------|-----------|---------|----------------|--------|------|-----------------|
| 1            | 1 (LM)    | 0.0328        | 0         | 60      | 3              | 303.10 | 8855 | 61.602          |
| 2            | 8632      | 5.7375        | 200       | 36049   | 7487           | 64.03  | 7468 | 897.894         |
| TIC:         |           | 5.7375        | ng/uL     |         |                |        |      |                 |
| TIM:         |           | 1.2616        | nmole/L   |         |                |        |      |                 |
| Total Conc.: |           | 5.8172        | ng/uL     |         |                |        |      |                 |
| GQN:         |           | 2.6           |           |         |                |        |      |                 |

Sample Peak Width (sec): 50    Sample Min Peak Height: 50    Sample Baseline V to V?: Y    Sample Baseline V to V pts: 3  
 Sample Filter: Binomial    # of Pts for Filter: 3    Sample Start Region (min): 0    Sample End Region (min): 50  
 Manual Baseline Start (min): 6    Manual Baseline End (min): 48  
 Marker Peak Width (sec): 5    Marker Min Peak Height: 200    Marker Baseline V to V?: Y    Marker Baseline V to V pts: 3  
 Lower Marker Selection: First Peak > 200 RFU    Upper Marker Selection: Last Peak > 200 RFU  
 Ladder Size (bp): 1, 75, 200, 300, 400, 500, 700, 1000, 1500, 2000, 3000, 4000, 5000, 7000, 10000, 20000  
 Quantification Using: Ladder    Final Concentration (ng/uL): 1.0417    Dilution Factor: 12.0  
 Size Threshold (b.p.): 10000



**Data File:** 2019 06 18 14H 35M.raw  
**Sample:** 103613-001-105 (20x dil.)  
**Well Location:** A2

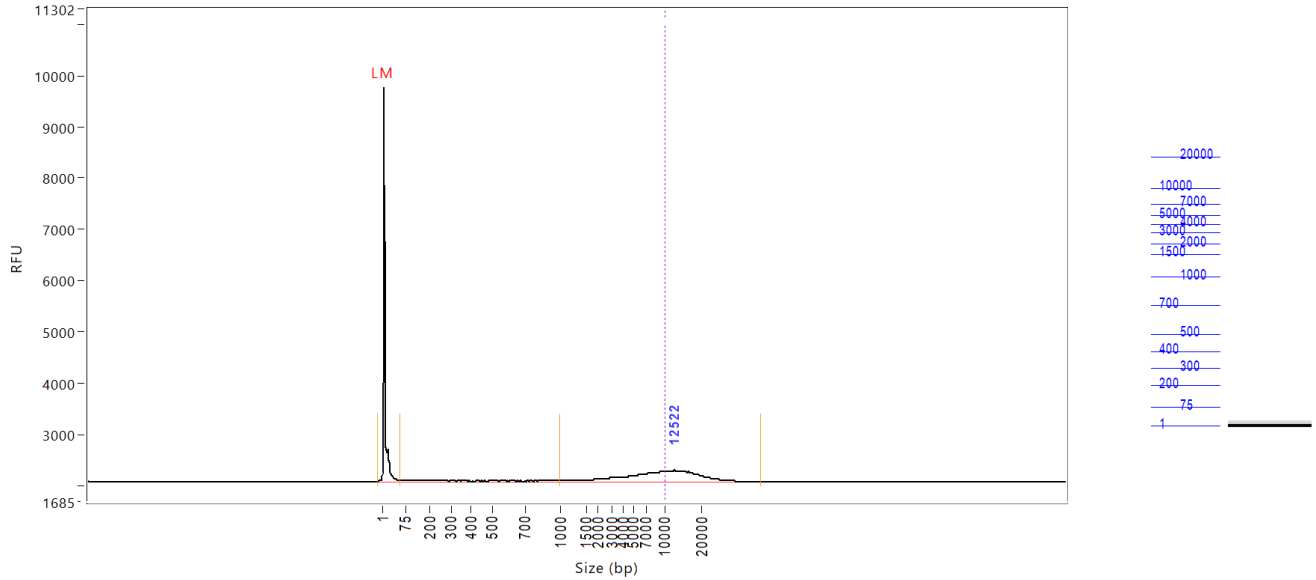

| Peak         | Size (bp) | Conc. (ng/uL) | From (bp) | To (bp) | Avg. Size (bp) | CV%    | RFU  | Corr. Peak Area |
|--------------|-----------|---------------|-----------|---------|----------------|--------|------|-----------------|
| 1            | 1 (LM)    | 0.0328        | 0         | 57      | 3              | 263.97 | 7691 | 54.682          |
| 2            | 12522     | 0.2802        | 994       | 35790   | 10398          | 64.21  | 213  | 38.920          |
| TIC:         |           | 0.2802        | ng/uL     |         |                |        |      |                 |
| TIM:         |           | 0.0444        | nmole/L   |         |                |        |      |                 |
| Total Conc.: |           | 0.3532        | ng/uL     |         |                |        |      |                 |
| GQN:         |           | 3.8           |           |         |                |        |      |                 |

Sample Peak Width (sec): 50    Sample Min Peak Height: 50    Sample Baseline V to V?: Y    Sample Baseline V to V pts: 3  
Sample Filter: Binomial    # of Pts for Filter: 3    Sample Start Region (min): 0    Sample End Region (min): 50  
Manual Baseline Start (min): 6    Manual Baseline End (min): 48  
Marker Peak Width (sec): 5    Marker Min Peak Height: 200    Marker Baseline V to V?: Y    Marker Baseline V to V pts: 3  
Lower Marker Selection: First Peak > 200 RFU    Upper Marker Selection: Last Peak > 200 RFU  
Ladder Size (bp): 1, 75, 200, 300, 400, 500, 700, 1000, 1500, 2000, 3000, 4000, 5000, 7000, 10000, 20000  
Quantification Using: Ladder    Final Concentration (ng/uL): 1.0417    Dilution Factor: 12.0  
Size Threshold (b.p.): 10000

**Data File:** 2019 06 18 14H 35M.raw  
**Sample:** 103613-001-106 (20x dil.)  
**Well Location:** B2

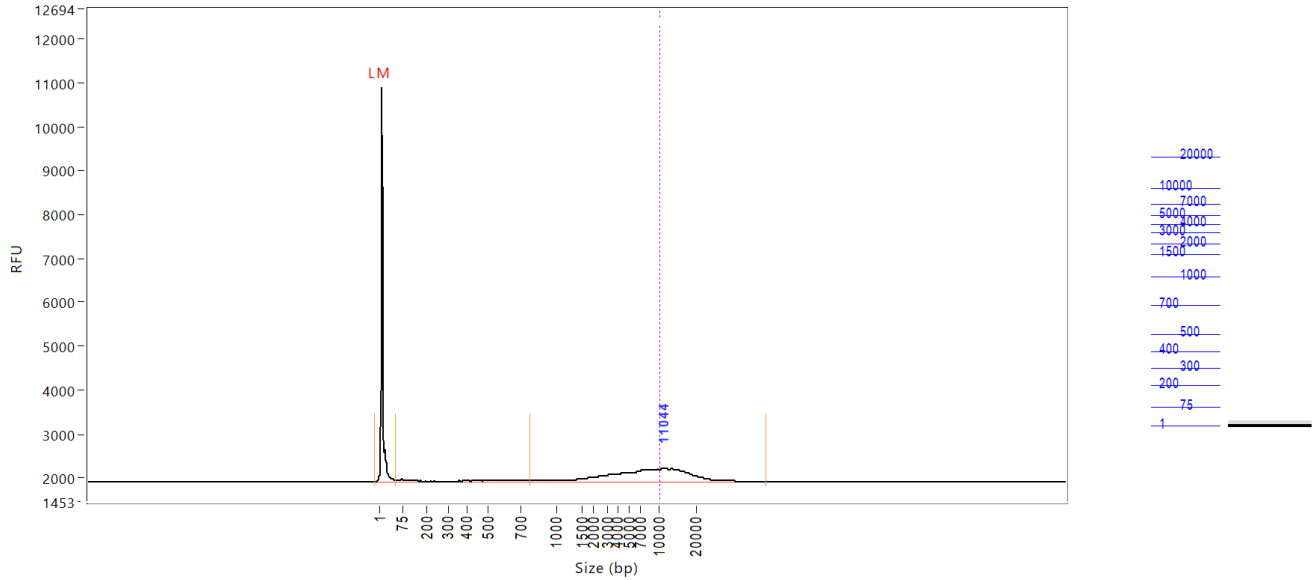

| Peak         | Size (bp) | Conc. (ng/uL) | From (bp) | To (bp) | Avg. Size (bp) | CV%    | RFU  | Corr. Peak Area |
|--------------|-----------|---------------|-----------|---------|----------------|--------|------|-----------------|
| 1            | 1 (LM)    | 0.0328        | 0         | 48      | 2              | 303.30 | 8991 | 62.461          |
| 2            | 11044     | 0.3659        | 762       | 38896   | 9065           | 73.32  | 287  | 58.055          |
| TIC:         |           | 0.3659        | ng/uL     |         |                |        |      |                 |
| TIM:         |           | 0.0664        | nmole/L   |         |                |        |      |                 |
| Total Conc.: |           | 0.4397        | ng/uL     |         |                |        |      |                 |
| GQN:         |           | 3.3           |           |         |                |        |      |                 |

Sample Peak Width (sec): 50    Sample Min Peak Height: 50    Sample Baseline V to V?: Y    Sample Baseline V to V pts: 3  
Sample Filter: Binomial    # of Pts for Filter: 3    Sample Start Region (min): 0    Sample End Region (min): 50  
Manual Baseline Start (min): 6    Manual Baseline End (min): 48  
Marker Peak Width (sec): 5    Marker Min Peak Height: 200    Marker Baseline V to V?: Y    Marker Baseline V to V pts: 3  
Lower Marker Selection: First Peak > 200 RFU    Upper Marker Selection: Last Peak > 200 RFU  
Ladder Size (bp): 1, 75, 200, 300, 400, 500, 700, 1000, 1500, 2000, 3000, 4000, 5000, 7000, 10000, 20000  
Quantification Using: Ladder    Final Concentration (ng/uL): 1.0417    Dilution Factor: 12.0  
Size Threshold (b.p.): 10000

**Data File:** 2019 06 18 14H 35M.raw  
**Sample:** 103613-001-107 (20x dil.)  
**Well Location:** C2

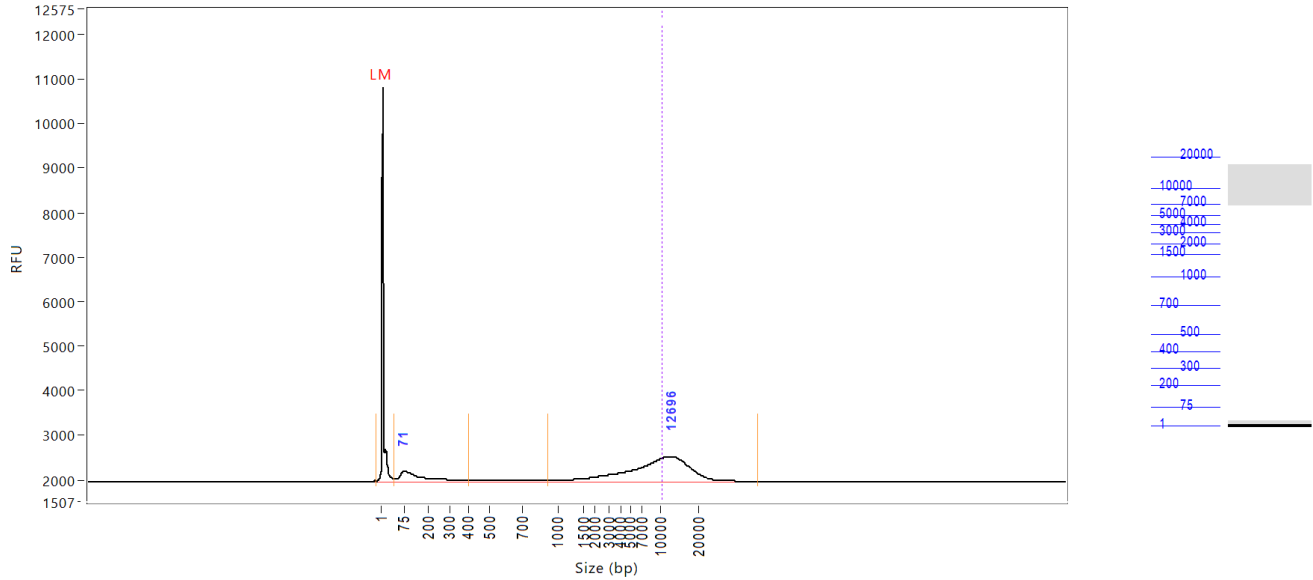

| Peak         | Size (bp) | Conc. (ng/uL) | From (bp) | To (bp) | Avg. Size (bp) | CV%    | RFU  | Corr. Peak Area |
|--------------|-----------|---------------|-----------|---------|----------------|--------|------|-----------------|
| 1            | 1 (LM)    | 0.0328        | 0         | 44      | 2              | 376.11 | 8847 | 63.024          |
| 2            | 71        | 0.1195        | 44        | 393     | 153            | 60.61  | 221  | 19.126          |
| 3            | 12696     | 0.5004        | 919       | 36049   | 9916           | 58.66  | 557  | 80.118          |
| TIC:         |           | 0.6199        | ng/uL     |         |                |        |      |                 |
| TIM:         |           | 1.3663        | nmole/L   |         |                |        |      |                 |
| Total Conc.: |           | 0.6727        | ng/uL     |         |                |        |      |                 |
| GQN:         |           | 3.4           |           |         |                |        |      |                 |

Sample Peak Width (sec): 50    Sample Min Peak Height: 50    Sample Baseline V to V?: Y    Sample Baseline V to V pts: 3  
Sample Filter: Binomial    # of Pts for Filter: 3    Sample Start Region (min): 0    Sample End Region (min): 50  
Manual Baseline Start (min): 6    Manual Baseline End (min): 48  
Marker Peak Width (sec): 5    Marker Min Peak Height: 200    Marker Baseline V to V?: Y    Marker Baseline V to V pts: 3  
Lower Marker Selection: First Peak > 200 RFU    Upper Marker Selection: Last Peak > 200 RFU  
Ladder Size (bp): 1, 75, 200, 300, 400, 500, 700, 1000, 1500, 2000, 3000, 4000, 5000, 7000, 10000, 20000  
Quantification Using: Ladder    Final Concentration (ng/uL): 1.0417    Dilution Factor: 12.0  
Size Threshold (b.p.): 10000

Data File: 2019 06 18 14H 35M.raw

Sample: 103613-001-108 (20x dil.)

Well Location: D2

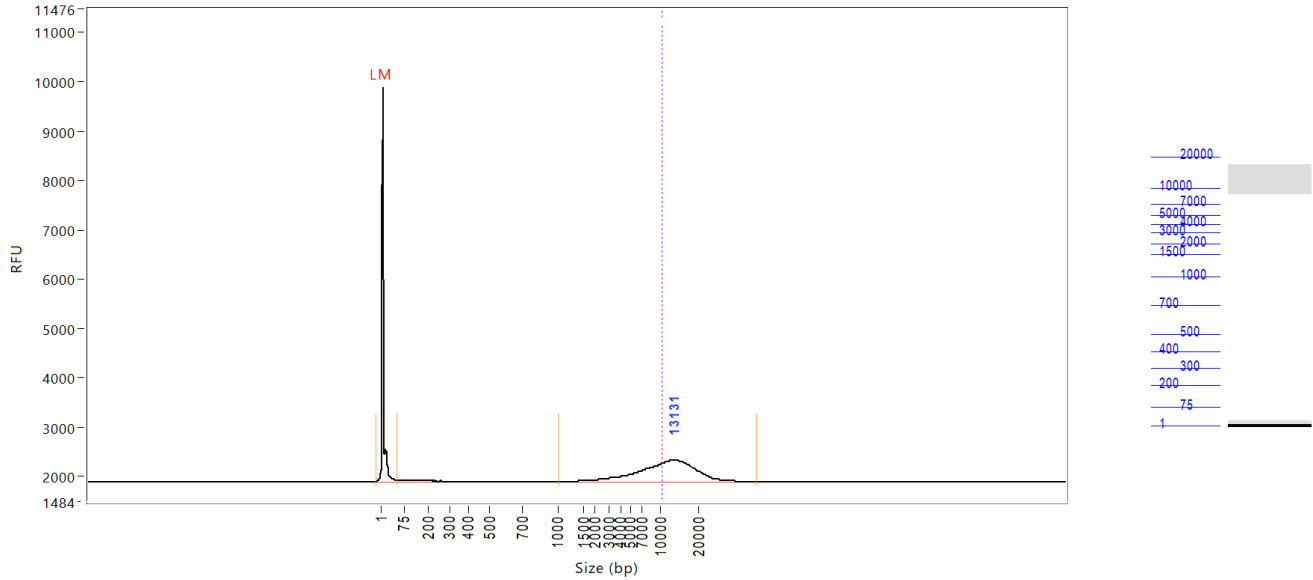

| Peak         | Size (bp) | Conc. (ng/uL) | From (bp) | To (bp) | Avg. Size (bp) | CV%    | RFU  | Corr. Peak Area |
|--------------|-----------|---------------|-----------|---------|----------------|--------|------|-----------------|
| 1            | 1 (LM)    | 0.0328        | 0         | 52      | 2              | 376.46 | 7992 | 56.961          |
| 2            | 13131     | 0.4454        | 1007      | 35531   | 11689          | 52.48  | 440  | 64.446          |
| TIC:         |           | 0.4454        | ng/uL     |         |                |        |      |                 |
| TIM:         |           | 0.0627        | nmole/L   |         |                |        |      |                 |
| Total Conc.: |           | 0.5156        | ng/uL     |         |                |        |      |                 |
| GQN:         |           | 5.1           |           |         |                |        |      |                 |

Sample Peak Width (sec): 50    Sample Min Peak Height: 50    Sample Baseline V to V?: Y    Sample Baseline V to V pts: 3  
 Sample Filter: Binomial    # of Pts for Filter: 3    Sample Start Region (min): 0    Sample End Region (min): 50  
 Manual Baseline Start (min): 6    Manual Baseline End (min): 48  
 Marker Peak Width (sec): 5    Marker Min Peak Height: 200    Marker Baseline V to V?: Y    Marker Baseline V to V pts: 3  
 Lower Marker Selection: First Peak > 200 RFU    Upper Marker Selection: Last Peak > 200 RFU  
 Ladder Size (bp): 1, 75, 200, 300, 400, 500, 700, 1000, 1500, 2000, 3000, 4000, 5000, 7000, 10000, 20000  
 Quantification Using: Ladder    Final Concentration (ng/uL): 1.0417    Dilution Factor: 12.0  
 Size Threshold (b.p.): 10000

**Data File:** 2019 06 18 14H 35M.raw  
**Sample:** 103613-001-109 (20x dil.)  
**Well Location:** E2

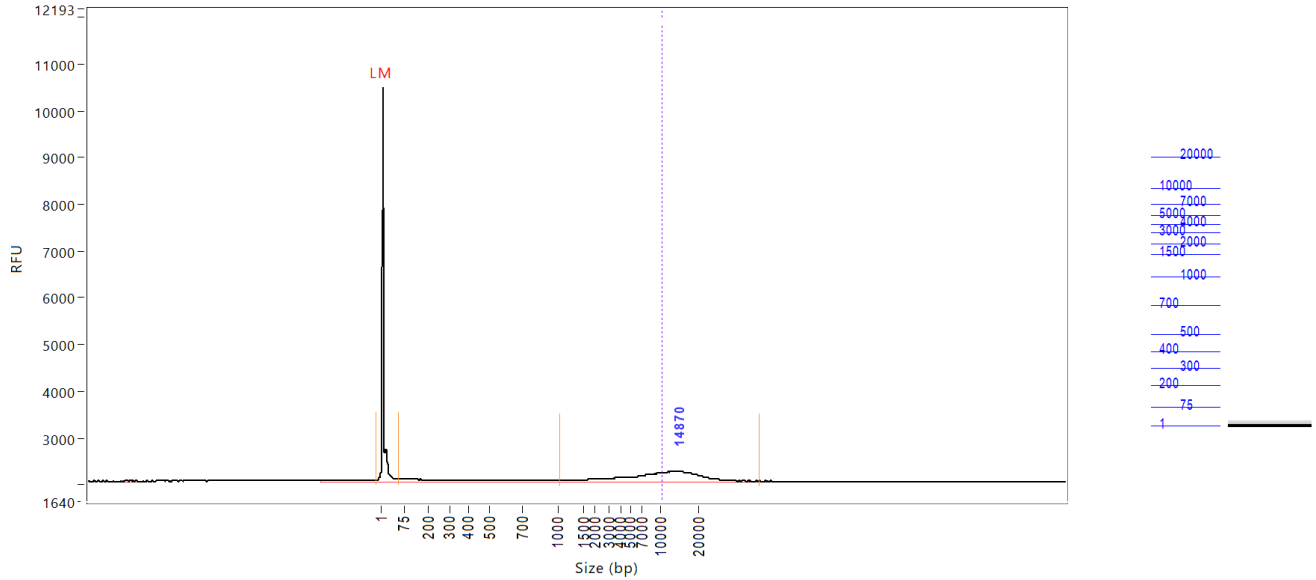

| Peak         | Size (bp) | Conc. (ng/uL) | From (bp) | To (bp) | Avg. Size (bp) | CV%    | RFU  | Corr. Peak Area |
|--------------|-----------|---------------|-----------|---------|----------------|--------|------|-----------------|
| 1            | 1 (LM)    | 0.0328        | 0         | 54      | 3              | 282.26 | 8423 | 59.451          |
| 2            | 14870     | 0.2481        | 1026      | 36135   | 11311          | 63.15  | 205  | 37.471          |
| TIC:         |           | 0.2481        | ng/uL     |         |                |        |      |                 |
| TIM:         |           | 0.0361        | nmole/L   |         |                |        |      |                 |
| Total Conc.: |           | 0.3472        | ng/uL     |         |                |        |      |                 |
| GQN:         |           | 4.0           |           |         |                |        |      |                 |

Sample Peak Width (sec): 50    Sample Min Peak Height: 50    Sample Baseline V to V?: Y    Sample Baseline V to V pts: 3  
Sample Filter: Binomial    # of Pts for Filter: 3    Sample Start Region (min): 0    Sample End Region (min): 50  
Manual Baseline Start (min): 6    Manual Baseline End (min): 48  
Marker Peak Width (sec): 5    Marker Min Peak Height: 200    Marker Baseline V to V?: Y    Marker Baseline V to V pts: 3  
Lower Marker Selection: First Peak > 200 RFU    Upper Marker Selection: Last Peak > 200 RFU  
Ladder Size (bp): 1, 75, 200, 300, 400, 500, 700, 1000, 1500, 2000, 3000, 4000, 5000, 7000, 10000, 20000  
Quantification Using: Ladder    Final Concentration (ng/uL): 1.0417    Dilution Factor: 12.0  
Size Threshold (b.p.): 10000

**Data File:** 2019 06 18 14H 35M.raw  
**Sample:** 103613-001-110 (20x dil.)  
**Well Location:** F2

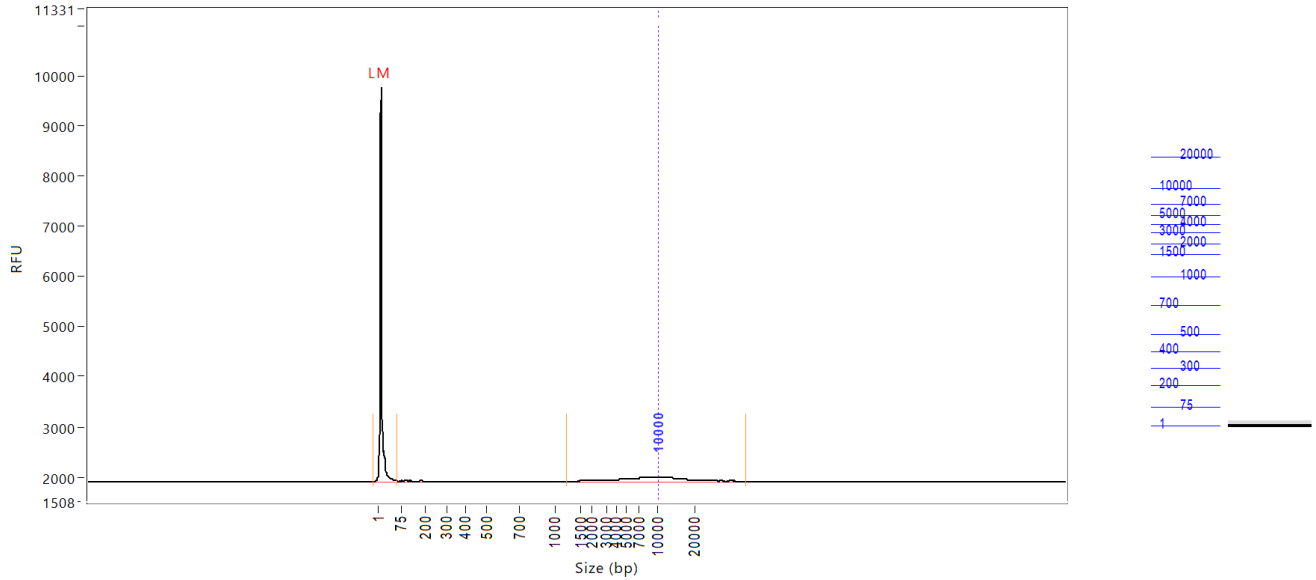

| Peak         | Size (bp) | Conc. (ng/uL) | From (bp) | To (bp) | Avg. Size (bp) | CV%    | RFU  | Corr. Peak Area |
|--------------|-----------|---------------|-----------|---------|----------------|--------|------|-----------------|
| 1            | 1 (LM)    | 0.0328        | 0         | 59      | 2              | 335.84 | 7855 | 55.308          |
| 2            | 10000     | 0.1114        | 1226      | 34151   | 10249          | 68.27  | 88   | 15.654          |
| TIC:         |           | 0.1114        | ng/uL     |         |                |        |      |                 |
| TIM:         |           | 0.0179        | nmole/L   |         |                |        |      |                 |
| Total Conc.: |           | 0.1563        | ng/uL     |         |                |        |      |                 |
| GQN:         |           | 3.3           |           |         |                |        |      |                 |

Sample Peak Width (sec): 50    Sample Min Peak Height: 50    Sample Baseline V to V?: Y    Sample Baseline V to V pts: 3  
Sample Filter: Binomial    # of Pts for Filter: 3    Sample Start Region (min): 0    Sample End Region (min): 50  
Manual Baseline Start (min): 6    Manual Baseline End (min): 48  
Marker Peak Width (sec): 5    Marker Min Peak Height: 200    Marker Baseline V to V?: Y    Marker Baseline V to V pts: 3  
Lower Marker Selection: First Peak > 200 RFU    Upper Marker Selection: Last Peak > 200 RFU  
Ladder Size (bp): 1, 75, 200, 300, 400, 500, 700, 1000, 1500, 2000, 3000, 4000, 5000, 7000, 10000, 20000  
Quantification Using: Ladder    Final Concentration (ng/uL): 1.0417    Dilution Factor: 12.0  
Size Threshold (b.p.): 10000

**Data File:** 2019 06 18 14H 35M.raw  
**Sample:** 103613-001-111 (20x dil.)  
**Well Location:** G2

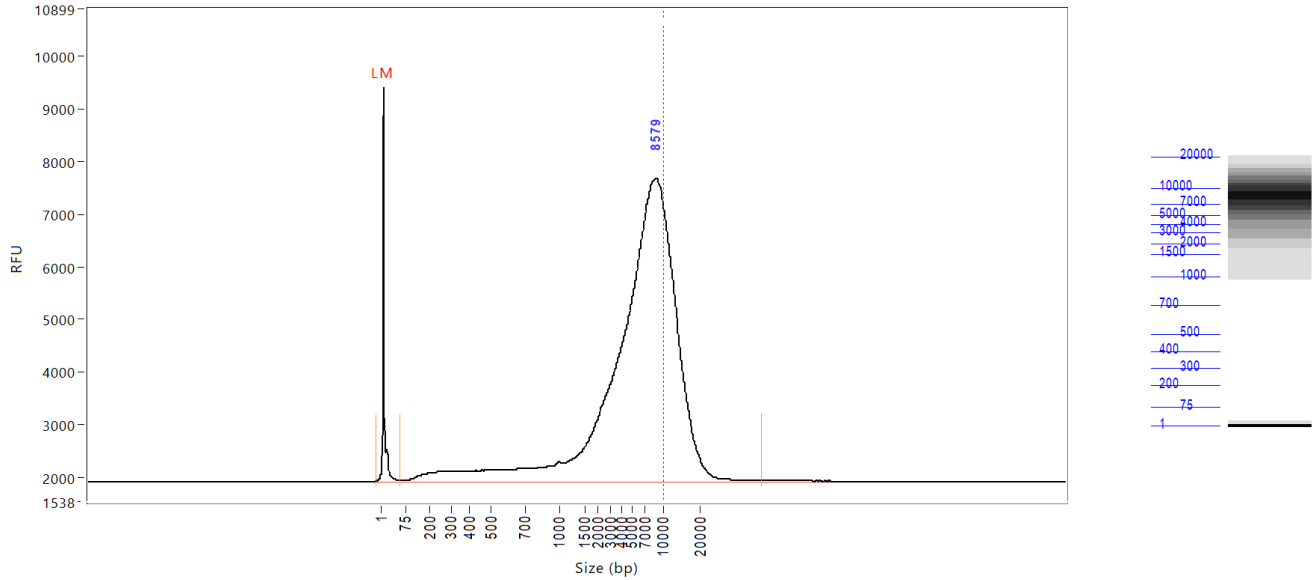

| Peak | Size (bp) | Conc. (ng/uL) | From (bp) | To (bp) | Avg. Size (bp) | CV%    | RFU  | Corr. Peak Area |
|------|-----------|---------------|-----------|---------|----------------|--------|------|-----------------|
| 1    | 1 (LM)    | 0.0328        | 0         | 55      | 2              | 355.71 | 7482 | 52.584          |
| 2    | 8579      | 5.6168        | 55        | 36567   | 6925           | 67.95  | 5752 | 750.319         |

TIC: 5.6168 ng/uL  
 TIM: 1.3353 nmole/L  
 Total Conc.: 5.6588 ng/uL  
 GQN: 2.3

Sample Peak Width (sec): 50    Sample Min Peak Height: 50    Sample Baseline V to V?: Y    Sample Baseline V to V pts: 3  
 Sample Filter: Binomial    # of Pts for Filter: 3    Sample Start Region (min): 0    Sample End Region (min): 50  
 Manual Baseline Start (min): 6    Manual Baseline End (min): 48  
 Marker Peak Width (sec): 5    Marker Min Peak Height: 200    Marker Baseline V to V?: Y    Marker Baseline V to V pts: 3  
 Lower Marker Selection: First Peak > 200 RFU    Upper Marker Selection: Last Peak > 200 RFU  
 Ladder Size (bp): 1, 75, 200, 300, 400, 500, 700, 1000, 1500, 2000, 3000, 4000, 5000, 7000, 10000, 20000  
 Quantification Using: Ladder    Final Concentration (ng/uL): 1.0417    Dilution Factor: 12.0  
 Size Threshold (b.p.): 10000

Data File: 2019 06 18 14H 35M.raw

Sample: 103613-001-112 (20x dil.)

Well Location: H2

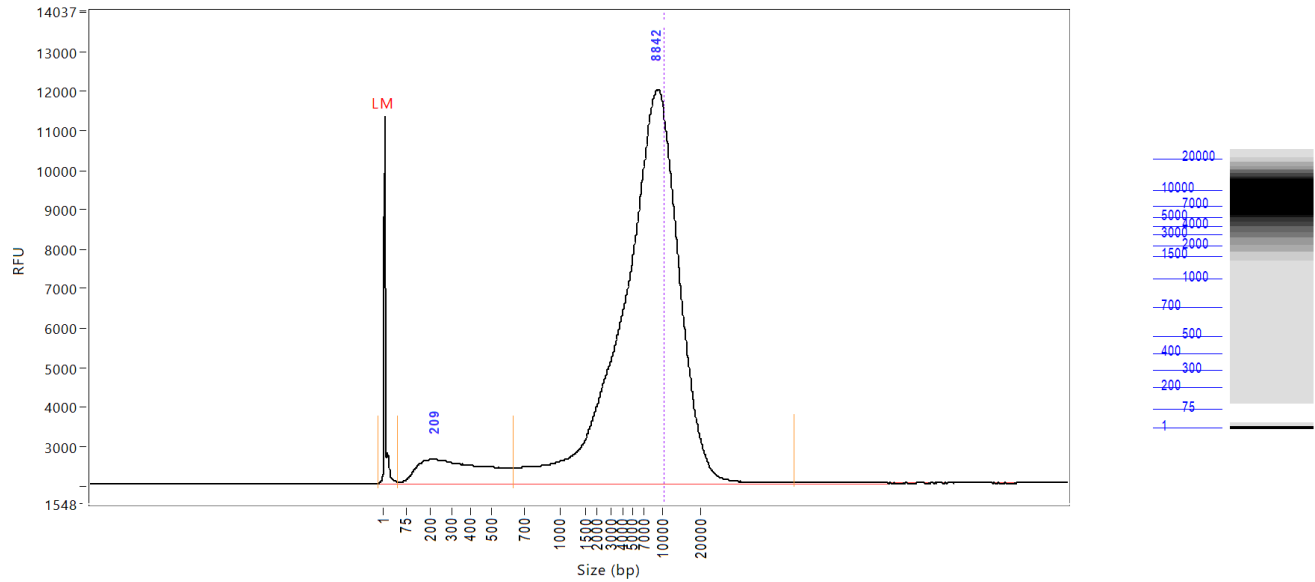

| Peak         | Size (bp) | Conc. (ng/uL) | From (bp) | To (bp) | Avg. Size (bp) | CV%    | RFU  | Corr. Peak Area |
|--------------|-----------|---------------|-----------|---------|----------------|--------|------|-----------------|
| 1            | 1 (LM)    | 0.0328        | 0         | 46      | 2              | 360.05 | 9301 | 65.533          |
| 2            | 209       | 0.8236        | 46        | 626     | 320            | 46.27  | 605  | 137.108         |
| 3            | 8842      | 7.5495        | 626       | 45109   | 7855           | 61.97  | 9975 | 1256.851        |
| TIC:         |           | 8.3731        | ng/uL     |         |                |        |      |                 |
| TIM:         |           | 5.8160        | nmole/L   |         |                |        |      |                 |
| Total Conc.: |           | 8.3880        | ng/uL     |         |                |        |      |                 |
| GQN:         |           | 2.5           |           |         |                |        |      |                 |

Sample Peak Width (sec): 50    Sample Min Peak Height: 50    Sample Baseline V to V?: Y    Sample Baseline V to V pts: 3  
 Sample Filter: Binomial    # of Pts for Filter: 3    Sample Start Region (min): 0    Sample End Region (min): 50  
 Manual Baseline Start (min): 6    Manual Baseline End (min): 48  
 Marker Peak Width (sec): 5    Marker Min Peak Height: 200    Marker Baseline V to V?: Y    Marker Baseline V to V pts: 3  
 Lower Marker Selection: First Peak > 200 RFU    Upper Marker Selection: Last Peak > 200 RFU  
 Ladder Size (bp): 1, 75, 200, 300, 400, 500, 700, 1000, 1500, 2000, 3000, 4000, 5000, 7000, 10000, 20000  
 Quantification Using: Ladder    Final Concentration (ng/uL): 1.0417    Dilution Factor: 12.0  
 Size Threshold (b.p.): 10000



Data File: 2019 06 18 14H 35M.raw

Sample: 103613-001-113 (20x dil.)

Well Location: A3

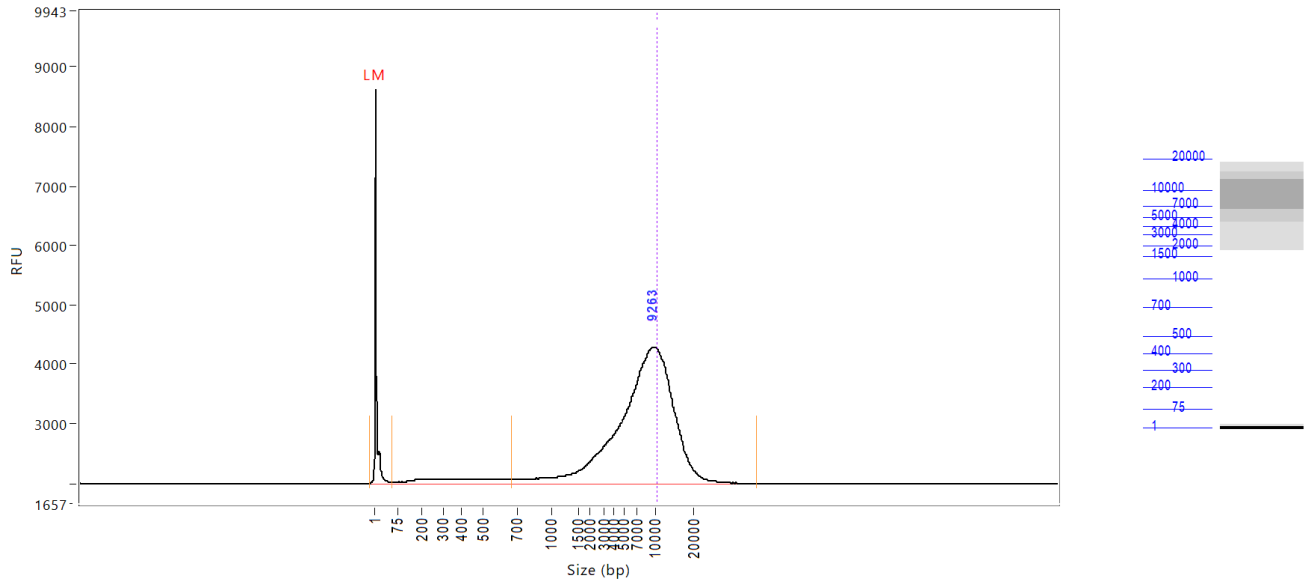

| Peak         | Size (bp) | Conc. (ng/uL) | From (bp) | To (bp) | Avg. Size (bp) | CV%    | RFU  | Corr. Peak Area |
|--------------|-----------|---------------|-----------|---------|----------------|--------|------|-----------------|
| 1            | 1 (LM)    | 0.0328        | 0         | 56      | 2              | 381.39 | 6626 | 47.710          |
| 2            | 9263      | 2.2790        | 663       | 36912   | 8358           | 57.36  | 2290 | 276.223         |
| TIC:         |           | 2.2790        | ng/uL     |         |                |        |      |                 |
| TIM:         |           | 0.4489        | nmole/L   |         |                |        |      |                 |
| Total Conc.: |           | 2.4589        | ng/uL     |         |                |        |      |                 |
| GQN:         |           | 3.0           |           |         |                |        |      |                 |

Sample Peak Width (sec): 50    Sample Min Peak Height: 50    Sample Baseline V to V?: Y    Sample Baseline V to V pts: 3  
 Sample Filter: Binomial    # of Pts for Filter: 3    Sample Start Region (min): 0    Sample End Region (min): 50  
 Manual Baseline Start (min): 6    Manual Baseline End (min): 48  
 Marker Peak Width (sec): 5    Marker Min Peak Height: 200    Marker Baseline V to V?: Y    Marker Baseline V to V pts: 3  
 Lower Marker Selection: First Peak > 200 RFU    Upper Marker Selection: Last Peak > 200 RFU  
 Ladder Size (bp): 1, 75, 200, 300, 400, 500, 700, 1000, 1500, 2000, 3000, 4000, 5000, 7000, 10000, 20000  
 Quantification Using: Ladder    Final Concentration (ng/uL): 1.0417    Dilution Factor: 12.0  
 Size Threshold (b.p.): 10000

Data File: 2019 06 18 14H 35M.raw

Sample: 103613-001-114 (20x dil.)

Well Location: B3

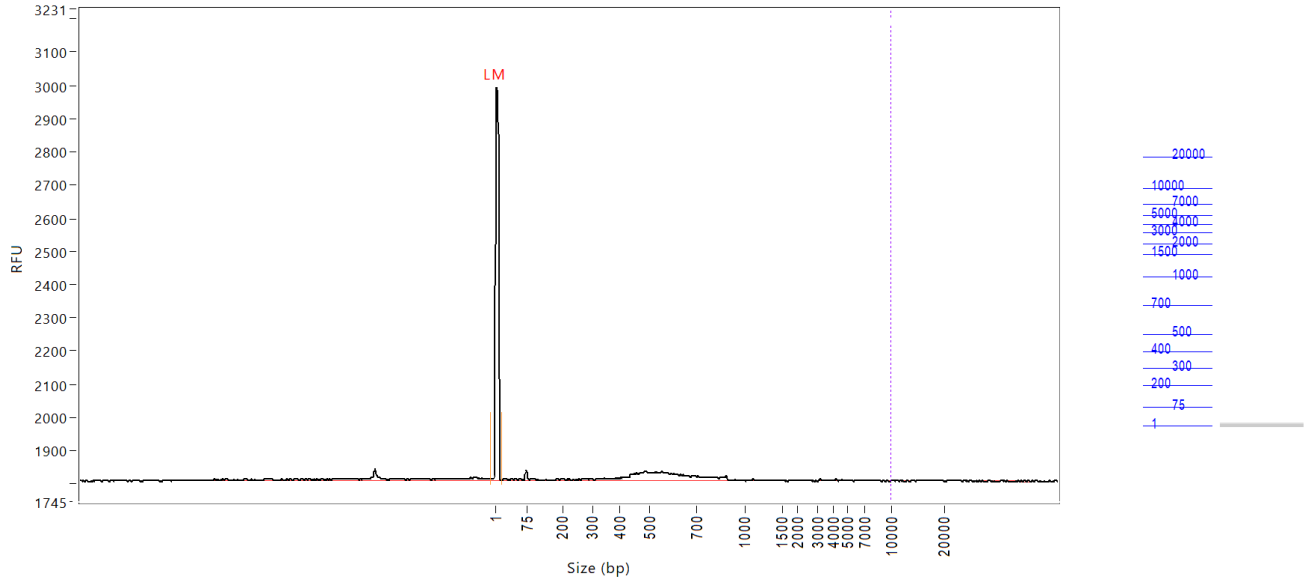

| Peak | Size (bp)    | Conc. (ng/uL) | From (bp) | To (bp) | Avg. Size (bp) | CV%    | RFU  | Corr. Peak Area |
|------|--------------|---------------|-----------|---------|----------------|--------|------|-----------------|
| 1    | 1 (LM)       | 0.0328        | 0         | 13      | 1              | 281.11 | 1185 | 10.579          |
|      | TIC:         | 0.0000        | ng/uL     |         |                |        |      |                 |
|      | TIM:         | 0.0000        | nmole/L   |         |                |        |      |                 |
|      | Total Conc.: | 0.1725        | ng/uL     |         |                |        |      |                 |
|      | GQN:         | 0.2           |           |         |                |        |      |                 |

Sample Peak Width (sec): 50    Sample Min Peak Height: 50    Sample Baseline V to V?: Y    Sample Baseline V to V pts: 3  
 Sample Filter: Binomial    # of Pts for Filter: 3    Sample Start Region (min): 0    Sample End Region (min): 50  
 Manual Baseline Start (min): 6    Manual Baseline End (min): 48  
 Marker Peak Width (sec): 5    Marker Min Peak Height: 200    Marker Baseline V to V?: Y    Marker Baseline V to V pts: 3  
 Lower Marker Selection: First Peak > 200 RFU    Upper Marker Selection: Last Peak > 200 RFU  
 Ladder Size (bp): 1, 75, 200, 300, 400, 500, 700, 1000, 1500, 2000, 3000, 4000, 5000, 7000, 10000, 20000  
 Quantification Using: Ladder    Final Concentration (ng/uL): 1.0417    Dilution Factor: 12.0  
 Size Threshold (b.p.): 10000

**Data File:** 2019 06 18 14H 35M.raw  
**Sample:** 103613-001-115 (20x dil.)  
**Well Location:** C3

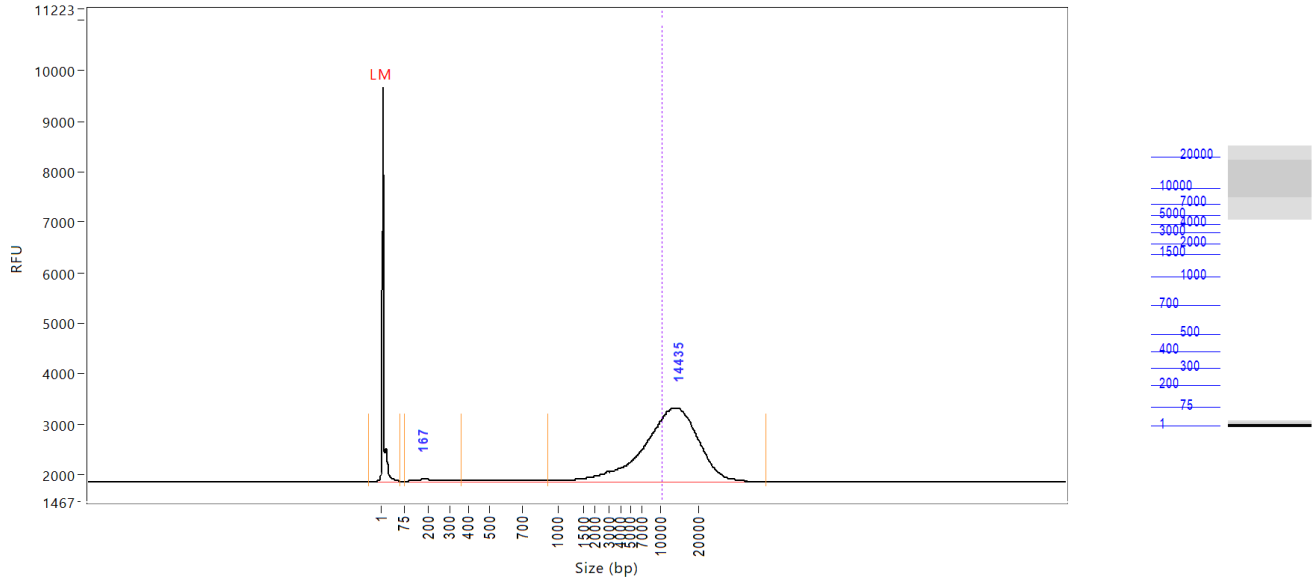

| Peak         | Size (bp) | Conc. (ng/uL) | From (bp) | To (bp) | Avg. Size (bp) | CV%    | RFU  | Corr. Peak Area |
|--------------|-----------|---------------|-----------|---------|----------------|--------|------|-----------------|
| 1            | 1 (LM)    | 0.0328        | 0         | 62      | 3              | 271.67 | 7802 | 56.136          |
| 2            | 167       | 0.0434        | 74        | 357     | 215            | 34.48  | 71   | 6.193           |
| 3            | 14435     | 1.4953        | 911       | 38292   | 12253          | 48.84  | 1455 | 213.247         |
| TIC:         |           | 1.5388        | ng/uL     |         |                |        |      |                 |
| TIM:         |           | 0.5330        | nmole/L   |         |                |        |      |                 |
| Total Conc.: |           | 1.5931        | ng/uL     |         |                |        |      |                 |
| GQN:         |           | 5.7           |           |         |                |        |      |                 |

Sample Peak Width (sec): 50    Sample Min Peak Height: 50    Sample Baseline V to V?: Y    Sample Baseline V to V pts: 3  
Sample Filter: Binomial    # of Pts for Filter: 3    Sample Start Region (min): 0    Sample End Region (min): 50  
Manual Baseline Start (min): 6    Manual Baseline End (min): 48  
Marker Peak Width (sec): 5    Marker Min Peak Height: 200    Marker Baseline V to V?: Y    Marker Baseline V to V pts: 3  
Lower Marker Selection: First Peak > 200 RFU    Upper Marker Selection: Last Peak > 200 RFU  
Ladder Size (bp): 1, 75, 200, 300, 400, 500, 700, 1000, 1500, 2000, 3000, 4000, 5000, 7000, 10000, 20000  
Quantification Using: Ladder    Final Concentration (ng/uL): 1.0417    Dilution Factor: 12.0  
Size Threshold (b.p.): 10000

Data File: 2019 06 18 14H 35M.raw  
 Sample: 103613-001-116 (20x dil.)  
 Well Location: D3

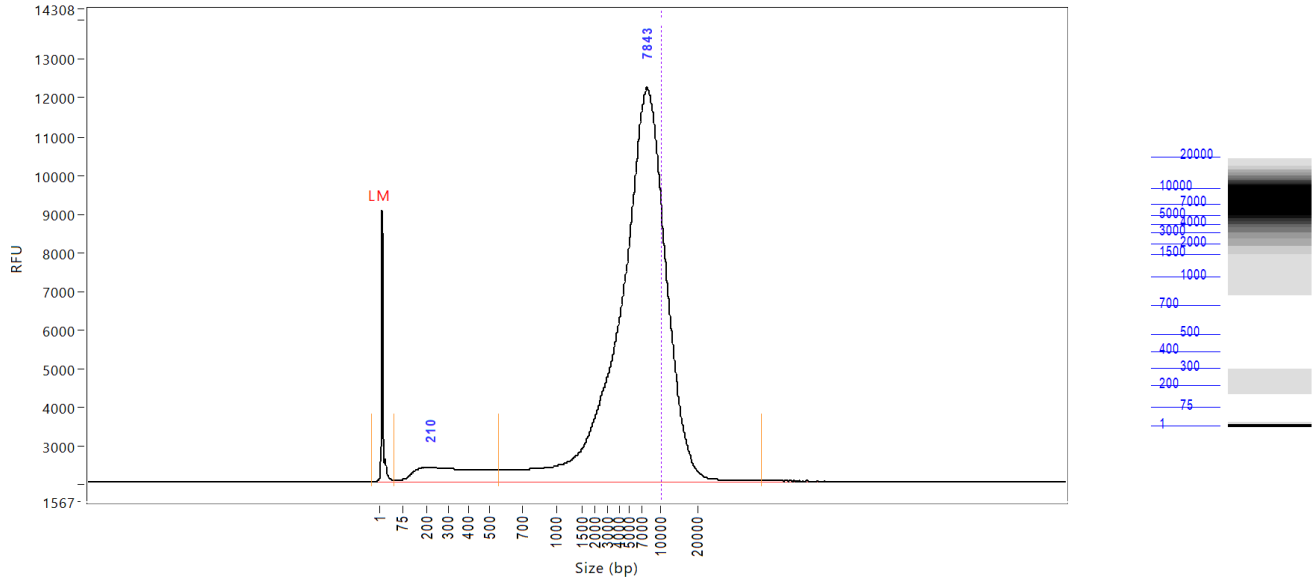

| Peak         | Size (bp) | Conc. (ng/uL) | From (bp) | To (bp) | Avg. Size (bp) | CV%    | RFU   | Corr. Peak Area |
|--------------|-----------|---------------|-----------|---------|----------------|--------|-------|-----------------|
| 1            | 1 (LM)    | 0.0328        | 0         | 45      | 2              | 366.55 | 7034  | 49.417          |
| 2            | 210       | 0.6276        | 45        | 550     | 300            | 43.45  | 364   | 78.792          |
| 3            | 7843      | 8.2263        | 550       | 37602   | 6952           | 56.82  | 10184 | 1032.726        |
| TIC:         |           | 8.8540        | ng/uL     |         |                |        |       |                 |
| TIM:         |           | 5.3894        | nmole/L   |         |                |        |       |                 |
| Total Conc.: |           | 8.8871        | ng/uL     |         |                |        |       |                 |
| GQN:         |           | 1.7           |           |         |                |        |       |                 |

Sample Peak Width (sec): 50    Sample Min Peak Height: 50    Sample Baseline V to V?: Y    Sample Baseline V to V pts: 3  
 Sample Filter: Binomial    # of Pts for Filter: 3    Sample Start Region (min): 0    Sample End Region (min): 50  
 Manual Baseline Start (min): 6    Manual Baseline End (min): 48  
 Marker Peak Width (sec): 5    Marker Min Peak Height: 200    Marker Baseline V to V?: Y    Marker Baseline V to V pts: 3  
 Lower Marker Selection: First Peak > 200 RFU    Upper Marker Selection: Last Peak > 200 RFU  
 Ladder Size (bp): 1, 75, 200, 300, 400, 500, 700, 1000, 1500, 2000, 3000, 4000, 5000, 7000, 10000, 20000  
 Quantification Using: Ladder    Final Concentration (ng/uL): 1.0417    Dilution Factor: 12.0  
 Size Threshold (b.p.): 10000

Data File: 2019 06 18 14H 35M.raw

Sample: 103613-001-117 (20x dil.)

Well Location: E3

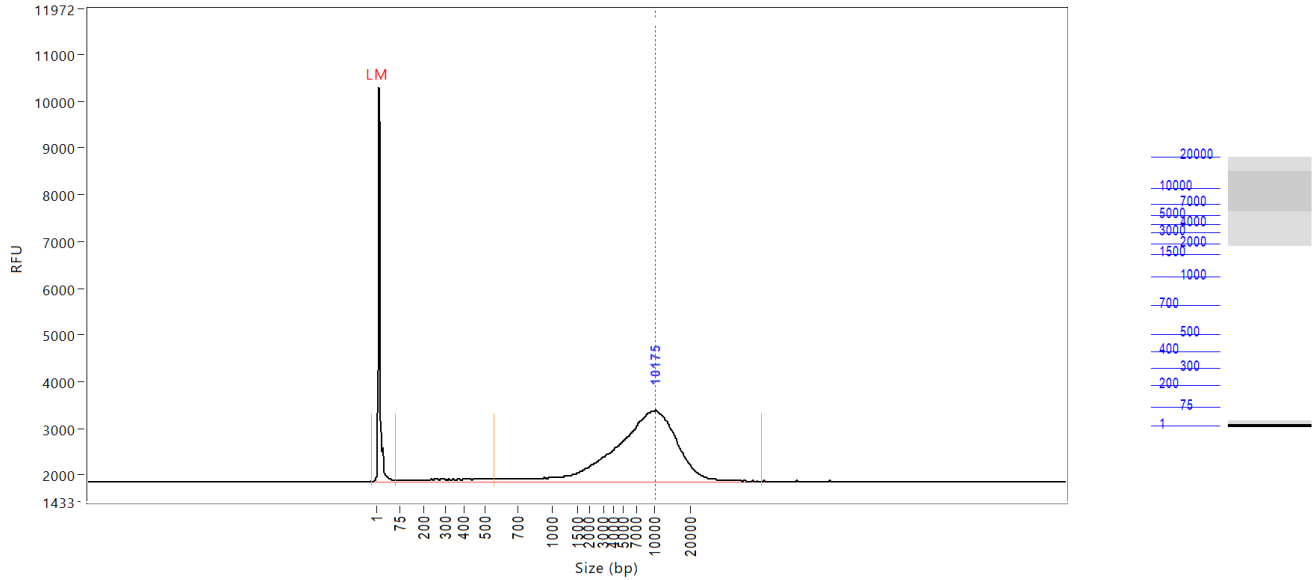

| Peak         | Size (bp) | Conc. (ng/uL) | From (bp) | To (bp) | Avg. Size (bp) | CV%    | RFU  | Corr. Peak Area |
|--------------|-----------|---------------|-----------|---------|----------------|--------|------|-----------------|
| 1            | 1 (LM)    | 0.0328        | 0         | 56      | 2              | 329.74 | 8427 | 59.756          |
| 2            | 10175     | 1.4780        | 556       | 39414   | 8666           | 65.30  | 1518 | 224.363         |
| TIC:         |           | 1.4780        | ng/uL     |         |                |        |      |                 |
| TIM:         |           | 0.2808        | nmole/L   |         |                |        |      |                 |
| Total Conc.: |           | 1.5914        | ng/uL     |         |                |        |      |                 |
| GQN:         |           | 3.4           |           |         |                |        |      |                 |

Sample Peak Width (sec): 50    Sample Min Peak Height: 50    Sample Baseline V to V?: Y    Sample Baseline V to V pts: 3  
 Sample Filter: Binomial    # of Pts for Filter: 3    Sample Start Region (min): 0    Sample End Region (min): 50  
 Manual Baseline Start (min): 6    Manual Baseline End (min): 48  
 Marker Peak Width (sec): 5    Marker Min Peak Height: 200    Marker Baseline V to V?: Y    Marker Baseline V to V pts: 3  
 Lower Marker Selection: First Peak > 200 RFU    Upper Marker Selection: Last Peak > 200 RFU  
 Ladder Size (bp): 1, 75, 200, 300, 400, 500, 700, 1000, 1500, 2000, 3000, 4000, 5000, 7000, 10000, 20000  
 Quantification Using: Ladder    Final Concentration (ng/uL): 1.0417    Dilution Factor: 12.0  
 Size Threshold (b.p.): 10000

**Data File:** 2019 06 18 14H 35M.raw  
**Sample:** 103613-001-118 (20x dil.)  
**Well Location:** F3

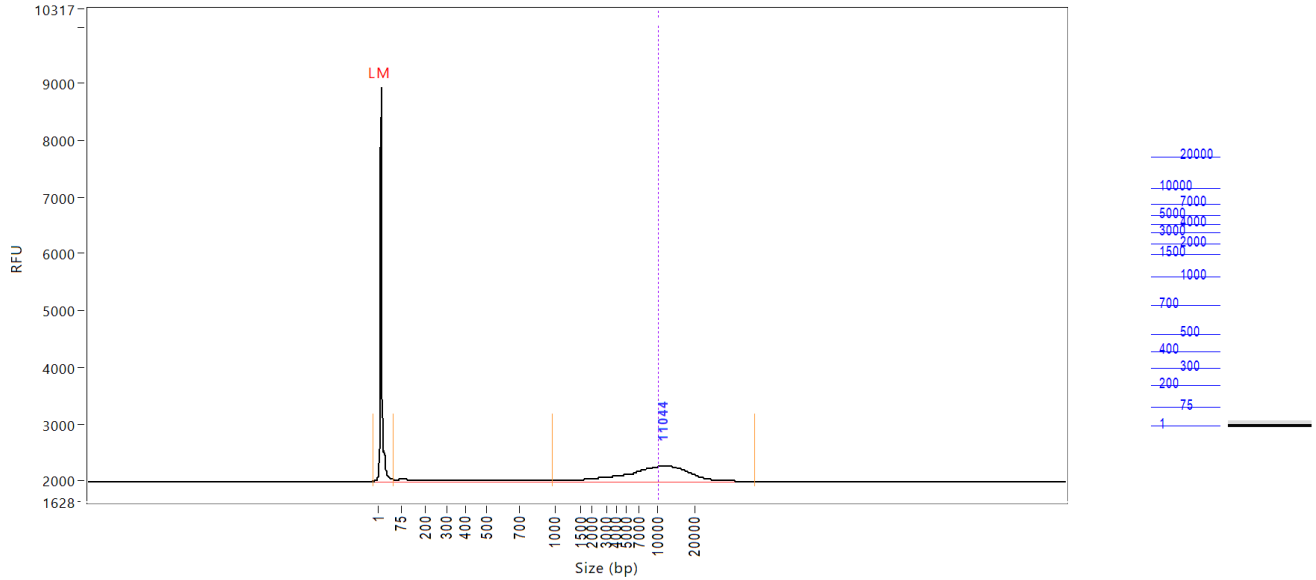

| Peak         | Size (bp) | Conc. (ng/uL) | From (bp) | To (bp) | Avg. Size (bp) | CV%    | RFU  | Corr. Peak Area |
|--------------|-----------|---------------|-----------|---------|----------------|--------|------|-----------------|
| 1            | 1 (LM)    | 0.0328        | 0         | 46      | 3              | 280.03 | 6942 | 48.700          |
| 2            | 11044     | 0.3470        | 983       | 36480   | 10470          | 58.80  | 273  | 42.931          |
| TIC:         |           | 0.3470        | ng/uL     |         |                |        |      |                 |
| TIM:         |           | 0.0546        | nmole/L   |         |                |        |      |                 |
| Total Conc.: |           | 0.4243        | ng/uL     |         |                |        |      |                 |
| GQN:         |           | 3.8           |           |         |                |        |      |                 |

Sample Peak Width (sec): 50    Sample Min Peak Height: 50    Sample Baseline V to V?: Y    Sample Baseline V to V pts: 3  
Sample Filter: Binomial    # of Pts for Filter: 3    Sample Start Region (min): 0    Sample End Region (min): 50  
Manual Baseline Start (min): 6    Manual Baseline End (min): 48  
Marker Peak Width (sec): 5    Marker Min Peak Height: 200    Marker Baseline V to V?: Y    Marker Baseline V to V pts: 3  
Lower Marker Selection: First Peak > 200 RFU    Upper Marker Selection: Last Peak > 200 RFU  
Ladder Size (bp): 1, 75, 200, 300, 400, 500, 700, 1000, 1500, 2000, 3000, 4000, 5000, 7000, 10000, 20000  
Quantification Using: Ladder    Final Concentration (ng/uL): 1.0417    Dilution Factor: 12.0  
Size Threshold (b.p.): 10000

**Data File:** 2019 06 18 14H 35M.raw  
**Sample:** 103613-001-119 (20x dil.)  
**Well Location:** G3

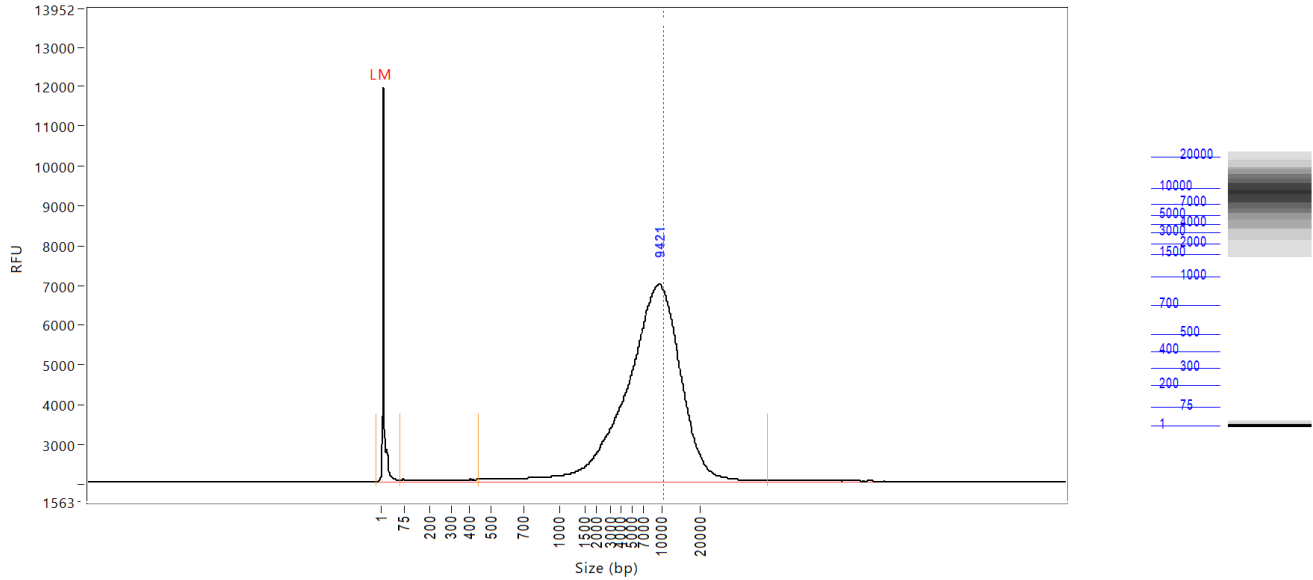

| Peak         | Size (bp) | Conc. (ng/uL) | From (bp) | To (bp) | Avg. Size (bp) | CV%    | RFU  | Corr. Peak Area |
|--------------|-----------|---------------|-----------|---------|----------------|--------|------|-----------------|
| 1            | 1 (LM)    | 0.0328        | 0         | 56      | 3              | 265.97 | 9905 | 70.450          |
| 2            | 9421      | 3.4545        | 439       | 38206   | 8547           | 58.74  | 4952 | 618.253         |
| TIC:         |           | 3.4545        | ng/uL     |         |                |        |      |                 |
| TIM:         |           | 0.6654        | nmole/L   |         |                |        |      |                 |
| Total Conc.: |           | 3.5509        | ng/uL     |         |                |        |      |                 |
| GQN:         |           | 3.3           |           |         |                |        |      |                 |

Sample Peak Width (sec): 50    Sample Min Peak Height: 50    Sample Baseline V to V?: Y    Sample Baseline V to V pts: 3  
Sample Filter: Binomial    # of Pts for Filter: 3    Sample Start Region (min): 0    Sample End Region (min): 50  
Manual Baseline Start (min): 6    Manual Baseline End (min): 48  
Marker Peak Width (sec): 5    Marker Min Peak Height: 200    Marker Baseline V to V?: Y    Marker Baseline V to V pts: 3  
Lower Marker Selection: First Peak > 200 RFU    Upper Marker Selection: Last Peak > 200 RFU  
Ladder Size (bp): 1, 75, 200, 300, 400, 500, 700, 1000, 1500, 2000, 3000, 4000, 5000, 7000, 10000, 20000  
Quantification Using: Ladder    Final Concentration (ng/uL): 1.0417    Dilution Factor: 12.0  
Size Threshold (b.p.): 10000

Data File: 2019 06 18 14H 35M.raw

Sample: 103613-001-120 (20x dil.)

Well Location: H3

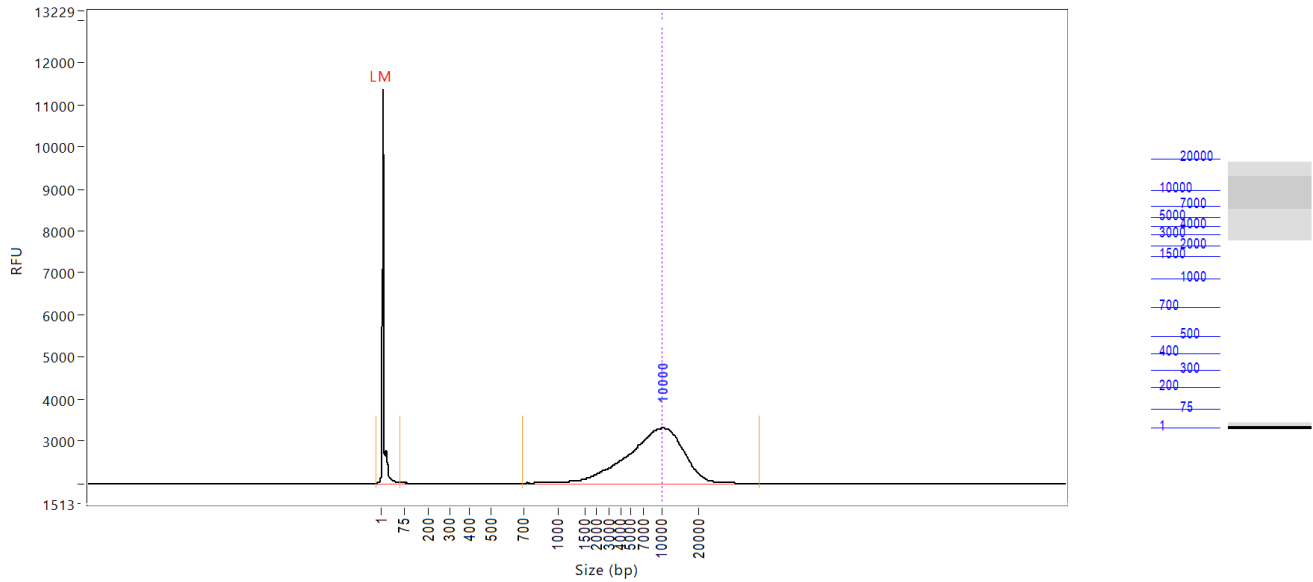

| Peak         | Size (bp) | Conc. (ng/uL) | From (bp) | To (bp) | Avg. Size (bp) | CV%    | RFU  | Corr. Peak Area |
|--------------|-----------|---------------|-----------|---------|----------------|--------|------|-----------------|
| 1            | 1 (LM)    | 0.0328        | 0         | 57      | 2              | 342.35 | 9367 | 65.698          |
| 2            | 10000     | 1.0526        | 690       | 36308   | 8974           | 56.50  | 1325 | 175.684         |
| TIC:         |           | 1.0526        | ng/uL     |         |                |        |      |                 |
| TIM:         |           | 0.1931        | nmole/L   |         |                |        |      |                 |
| Total Conc.: |           | 1.0879        | ng/uL     |         |                |        |      |                 |
| GQN:         |           | 3.7           |           |         |                |        |      |                 |

Sample Peak Width (sec): 50    Sample Min Peak Height: 50    Sample Baseline V to V?: Y    Sample Baseline V to V pts: 3  
 Sample Filter: Binomial    # of Pts for Filter: 3    Sample Start Region (min): 0    Sample End Region (min): 50  
 Manual Baseline Start (min): 6    Manual Baseline End (min): 48  
 Marker Peak Width (sec): 5    Marker Min Peak Height: 200    Marker Baseline V to V?: Y    Marker Baseline V to V pts: 3  
 Lower Marker Selection: First Peak > 200 RFU    Upper Marker Selection: Last Peak > 200 RFU  
 Ladder Size (bp): 1, 75, 200, 300, 400, 500, 700, 1000, 1500, 2000, 3000, 4000, 5000, 7000, 10000, 20000  
 Quantification Using: Ladder    Final Concentration (ng/uL): 1.0417    Dilution Factor: 12.0  
 Size Threshold (b.p.): 10000



**Data File:** 2019 06 18 14H 35M.raw  
**Sample:** 103613-001-121 (20x dil.)  
**Well Location:** A4

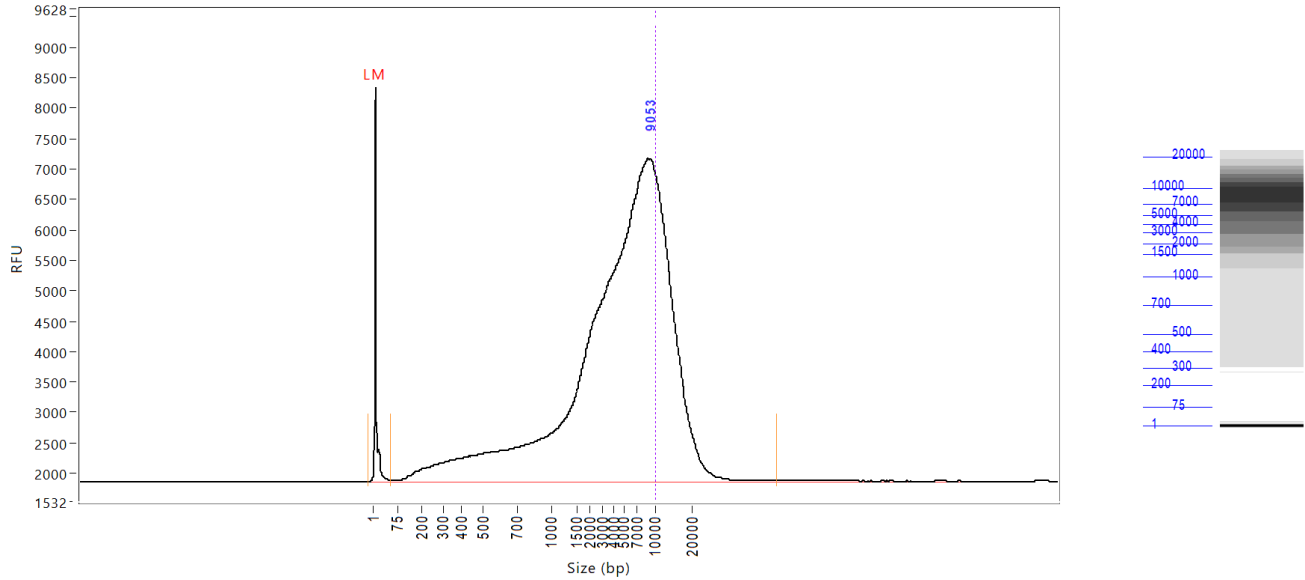

| Peak         | Size (bp) | Conc. (ng/uL) | From (bp) | To (bp) | Avg. Size (bp) | CV%    | RFU  | Corr. Peak Area |
|--------------|-----------|---------------|-----------|---------|----------------|--------|------|-----------------|
| 1            | 1 (LM)    | 0.0328        | 0         | 52      | 2              | 363.80 | 6473 | 45.886          |
| 2            | 9053      | 8.4676        | 52        | 42434   | 6094           | 84.79  | 5303 | 987.049         |
| TIC:         |           | 8.4676        | ng/uL     |         |                |        |      |                 |
| TIM:         |           | 2.2875        | nmole/L   |         |                |        |      |                 |
| Total Conc.: |           | 8.5093        | ng/uL     |         |                |        |      |                 |
| GQN:         |           | 2.1           |           |         |                |        |      |                 |

Sample Peak Width (sec): 50    Sample Min Peak Height: 50    Sample Baseline V to V?: Y    Sample Baseline V to V pts: 3  
Sample Filter: Binomial    # of Pts for Filter: 3    Sample Start Region (min): 0    Sample End Region (min): 50  
Manual Baseline Start (min): 6    Manual Baseline End (min): 48  
Marker Peak Width (sec): 5    Marker Min Peak Height: 200    Marker Baseline V to V?: Y    Marker Baseline V to V pts: 3  
Lower Marker Selection: First Peak > 200 RFU    Upper Marker Selection: Last Peak > 200 RFU  
Ladder Size (bp): 1, 75, 200, 300, 400, 500, 700, 1000, 1500, 2000, 3000, 4000, 5000, 7000, 10000, 20000  
Quantification Using: Ladder    Final Concentration (ng/uL): 1.0417    Dilution Factor: 12.0  
Size Threshold (b.p.): 10000

Data File: 2019 06 18 14H 35M.raw

Sample: 103613-001-122 (20x dil.)

Well Location: B4

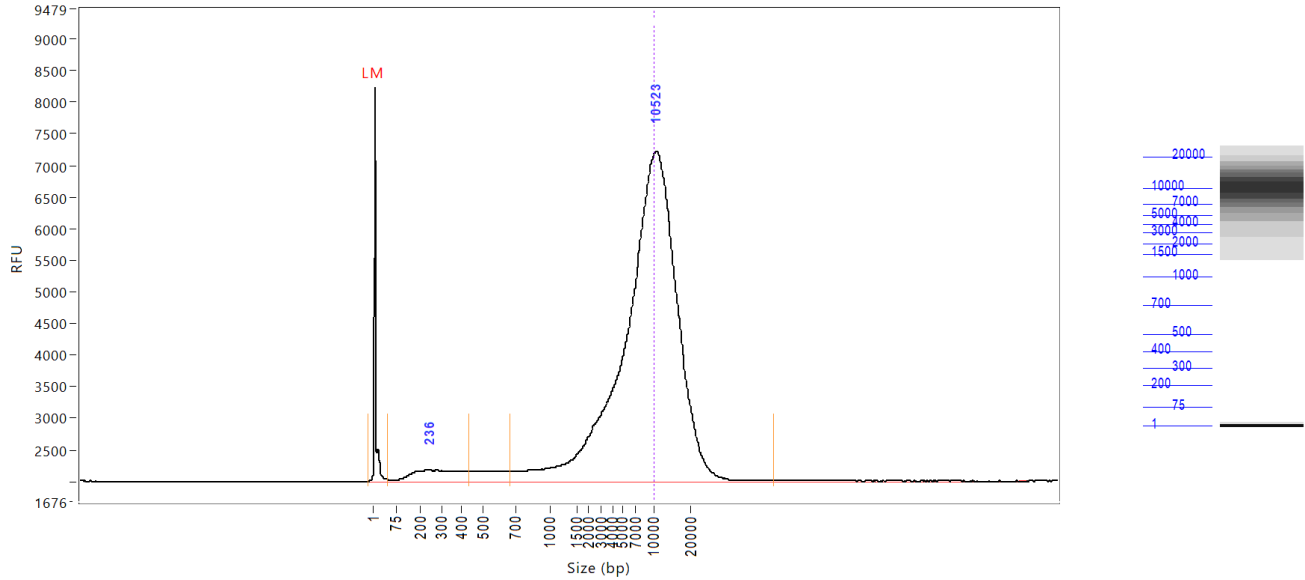

| Peak | Size (bp)    | Conc. (ng/uL) | From (bp) | To (bp) | Avg. Size (bp) | CV%    | RFU  | Corr. Peak Area |
|------|--------------|---------------|-----------|---------|----------------|--------|------|-----------------|
| 1    | 1 (LM)       | 0.0328        | 0         | 45      | 2              | 358.19 | 6238 | 43.621          |
| 2    | 236          | 0.2708        | 45        | 435     | 263            | 37.21  | 172  | 30.004          |
| 3    | 10523        | 5.8320        | 665       | 42089   | 9420           | 56.33  | 5224 | 646.277         |
|      | TIC:         | 6.1027        | ng/uL     |         |                |        |      |                 |
|      | TIM:         | 2.7125        | nmole/L   |         |                |        |      |                 |
|      | Total Conc.: | 6.2705        | ng/uL     |         |                |        |      |                 |
|      | GQN:         | 3.9           |           |         |                |        |      |                 |

Sample Peak Width (sec): 50    Sample Min Peak Height: 50    Sample Baseline V to V?: Y    Sample Baseline V to V pts: 3  
 Sample Filter: Binomial    # of Pts for Filter: 3    Sample Start Region (min): 0    Sample End Region (min): 50  
 Manual Baseline Start (min): 6    Manual Baseline End (min): 48  
 Marker Peak Width (sec): 5    Marker Min Peak Height: 200    Marker Baseline V to V?: Y    Marker Baseline V to V pts: 3  
 Lower Marker Selection: First Peak > 200 RFU    Upper Marker Selection: Last Peak > 200 RFU  
 Ladder Size (bp): 1, 75, 200, 300, 400, 500, 700, 1000, 1500, 2000, 3000, 4000, 5000, 7000, 10000, 20000  
 Quantification Using: Ladder    Final Concentration (ng/uL): 1.0417    Dilution Factor: 12.0  
 Size Threshold (b.p.): 10000

**Data File:** 2019 06 18 14H 35M.raw  
**Sample:** 103613-001-123 (20x dil.)  
**Well Location:** C4

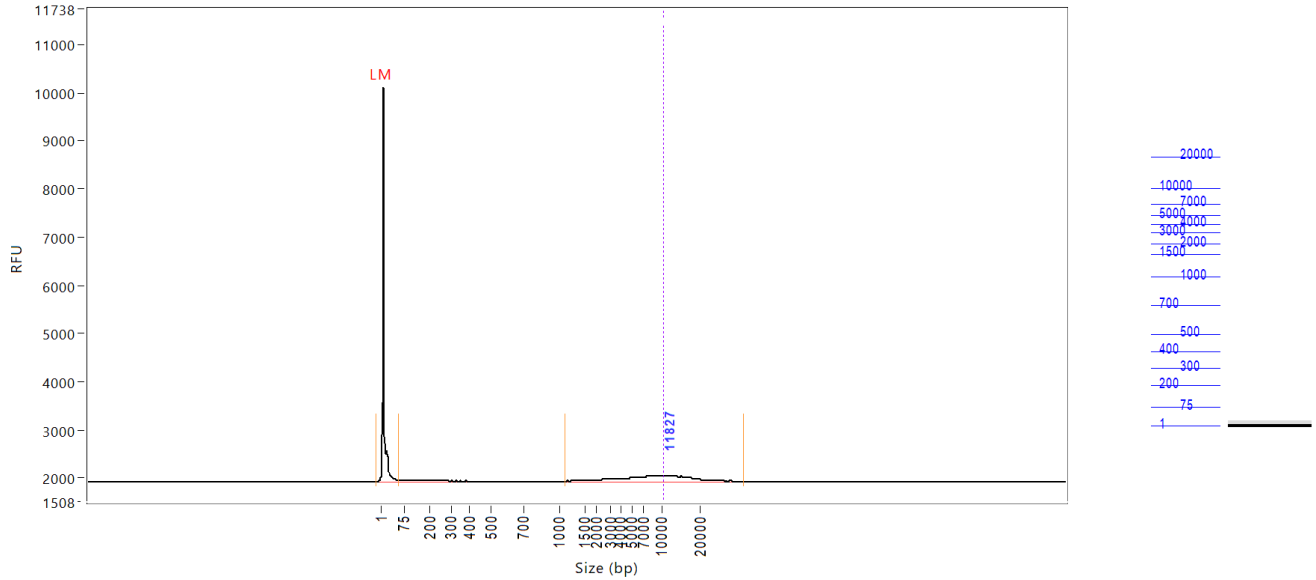

| Peak         | Size (bp) | Conc. (ng/uL) | From (bp) | To (bp) | Avg. Size (bp) | CV%    | RFU  | Corr. Peak Area |
|--------------|-----------|---------------|-----------|---------|----------------|--------|------|-----------------|
| 1            | 1 (LM)    | 0.0328        | 0         | 52      | 3              | 282.86 | 8181 | 57.085          |
| 2            | 11827     | 0.1566        | 1120      | 31735   | 9578           | 66.37  | 128  | 22.714          |
| TIC:         |           | 0.1566        | ng/uL     |         |                |        |      |                 |
| TIM:         |           | 0.0269        | nmole/L   |         |                |        |      |                 |
| Total Conc.: |           | 0.2246        | ng/uL     |         |                |        |      |                 |
| GQN:         |           | 3.0           |           |         |                |        |      |                 |

Sample Peak Width (sec): 50    Sample Min Peak Height: 50    Sample Baseline V to V?: Y    Sample Baseline V to V pts: 3  
Sample Filter: Binomial    # of Pts for Filter: 3    Sample Start Region (min): 0    Sample End Region (min): 50  
Manual Baseline Start (min): 6    Manual Baseline End (min): 48  
Marker Peak Width (sec): 5    Marker Min Peak Height: 200    Marker Baseline V to V?: Y    Marker Baseline V to V pts: 3  
Lower Marker Selection: First Peak > 200 RFU    Upper Marker Selection: Last Peak > 200 RFU  
Ladder Size (bp): 1, 75, 200, 300, 400, 500, 700, 1000, 1500, 2000, 3000, 4000, 5000, 7000, 10000, 20000  
Quantification Using: Ladder    Final Concentration (ng/uL): 1.0417    Dilution Factor: 12.0  
Size Threshold (b.p.): 10000

**Data File:** 2019 06 18 14H 35M.raw  
**Sample:** 103613-001-124 (20x dil.)  
**Well Location:** D4

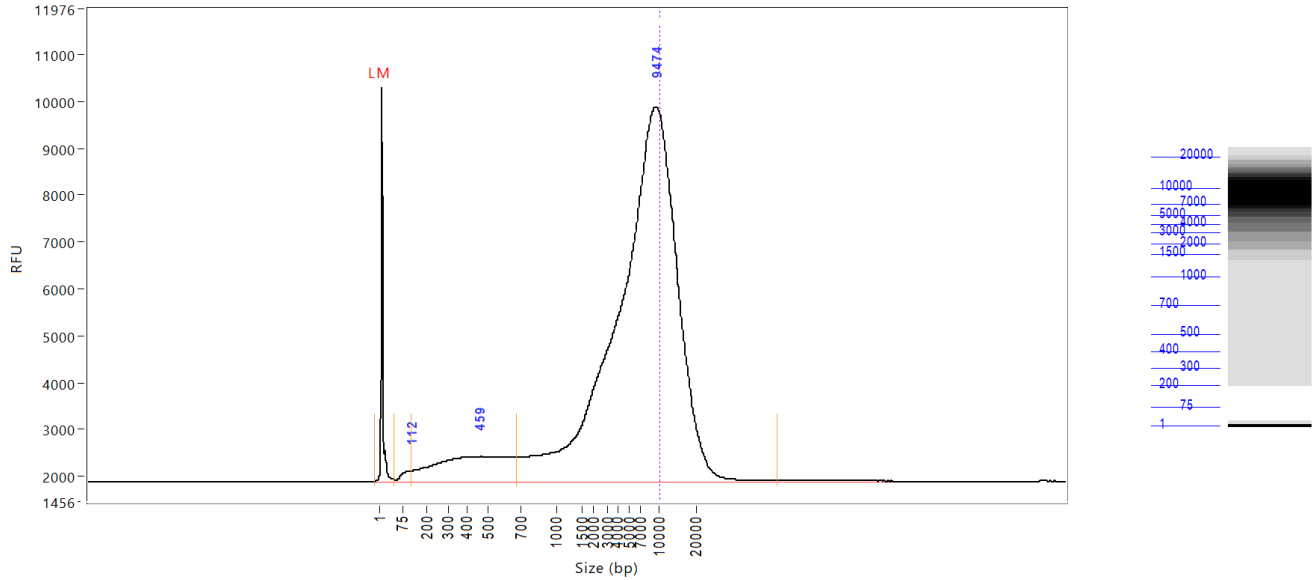

| Peak         | Size (bp) | Conc. (ng/uL) | From (bp) | To (bp) | Avg. Size (bp) | CV%    | RFU  | Corr. Peak Area |
|--------------|-----------|---------------|-----------|---------|----------------|--------|------|-----------------|
| 1            | 1 (LM)    | 0.0328        | 0         | 44      | 2              | 321.26 | 8411 | 58.455          |
| 2            | 112       | 0.0550        | 44        | 114     | 83             | 22.22  | 224  | 8.165           |
| 3            | 459       | 0.8562        | 114       | 673     | 400            | 37.40  | 535  | 127.147         |
| 4            | 9474      | 7.3636        | 673       | 41830   | 7848           | 65.09  | 7996 | 1093.489        |
| TIC:         |           | 8.2748        | ng/uL     |         |                |        |      |                 |
| TIM:         |           | 6.1538        | nmole/L   |         |                |        |      |                 |
| Total Conc.: |           | 8.3127        | ng/uL     |         |                |        |      |                 |
| GQN:         |           | 2.6           |           |         |                |        |      |                 |

Sample Peak Width (sec): 50    Sample Min Peak Height: 50    Sample Baseline V to V?: Y    Sample Baseline V to V pts: 3  
 Sample Filter: Binomial    # of Pts for Filter: 3    Sample Start Region (min): 0    Sample End Region (min): 50  
 Manual Baseline Start (min): 6    Manual Baseline End (min): 48  
 Marker Peak Width (sec): 5    Marker Min Peak Height: 200    Marker Baseline V to V?: Y    Marker Baseline V to V pts: 3  
 Lower Marker Selection: First Peak > 200 RFU    Upper Marker Selection: Last Peak > 200 RFU  
 Ladder Size (bp): 1, 75, 200, 300, 400, 500, 700, 1000, 1500, 2000, 3000, 4000, 5000, 7000, 10000, 20000  
 Quantification Using: Ladder    Final Concentration (ng/uL): 1.0417    Dilution Factor: 12.0  
 Size Threshold (b.p.): 10000

Data File: 2019 06 18 14H 35M.raw

Sample: 103613-001-125 (20x dil.)

Well Location: E4

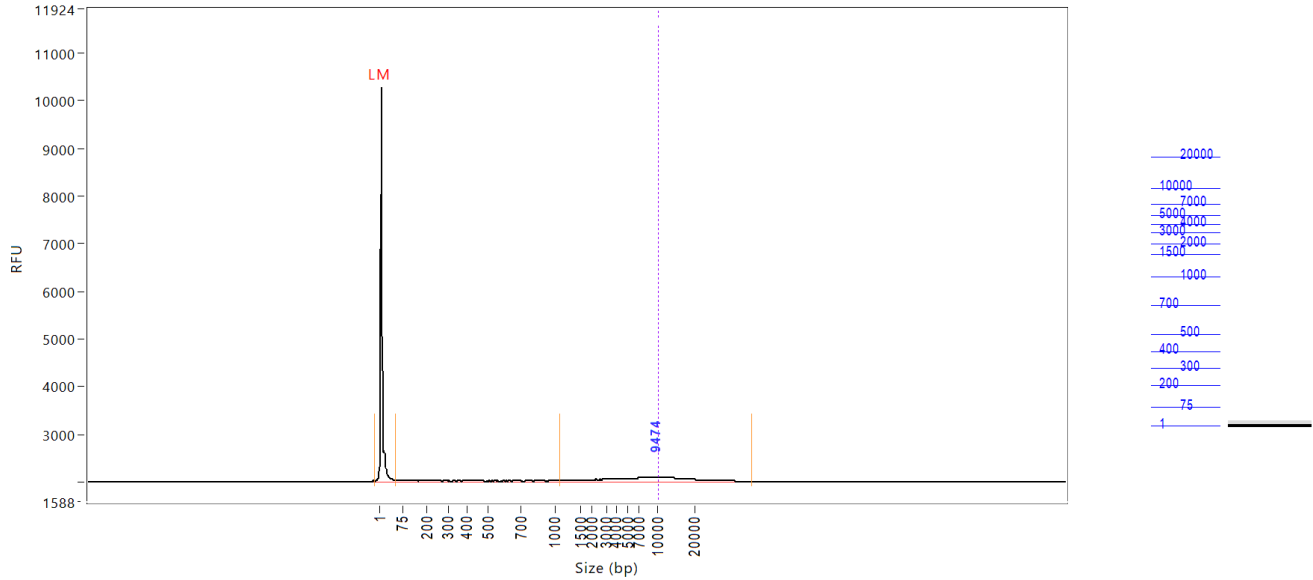

| Peak         | Size (bp) | Conc. (ng/uL) | From (bp) | To (bp) | Avg. Size (bp) | CV%    | RFU  | Corr. Peak Area |
|--------------|-----------|---------------|-----------|---------|----------------|--------|------|-----------------|
| 1            | 1 (LM)    | 0.0328        | 0         | 52      | 2              | 298.28 | 8258 | 57.498          |
| 2            | 9474      | 0.1268        | 1088      | 35445   | 10375          | 74.28  | 85   | 18.528          |
| TIC:         |           | 0.1268        | ng/uL     |         |                |        |      |                 |
| TIM:         |           | 0.0201        | nmole/L   |         |                |        |      |                 |
| Total Conc.: |           | 0.1861        | ng/uL     |         |                |        |      |                 |
| GQN:         |           | 3.5           |           |         |                |        |      |                 |

Sample Peak Width (sec): 50    Sample Min Peak Height: 50    Sample Baseline V to V?: Y    Sample Baseline V to V pts: 3  
 Sample Filter: Binomial    # of Pts for Filter: 3    Sample Start Region (min): 0    Sample End Region (min): 50  
 Manual Baseline Start (min): 6    Manual Baseline End (min): 48  
 Marker Peak Width (sec): 5    Marker Min Peak Height: 200    Marker Baseline V to V?: Y    Marker Baseline V to V pts: 3  
 Lower Marker Selection: First Peak > 200 RFU    Upper Marker Selection: Last Peak > 200 RFU  
 Ladder Size (bp): 1, 75, 200, 300, 400, 500, 700, 1000, 1500, 2000, 3000, 4000, 5000, 7000, 10000, 20000  
 Quantification Using: Ladder    Final Concentration (ng/uL): 1.0417    Dilution Factor: 12.0  
 Size Threshold (b.p.): 10000

Data File: 2019 06 18 14H 35M.raw

Sample: 103613-001-126 (20x dil.)

Well Location: F4

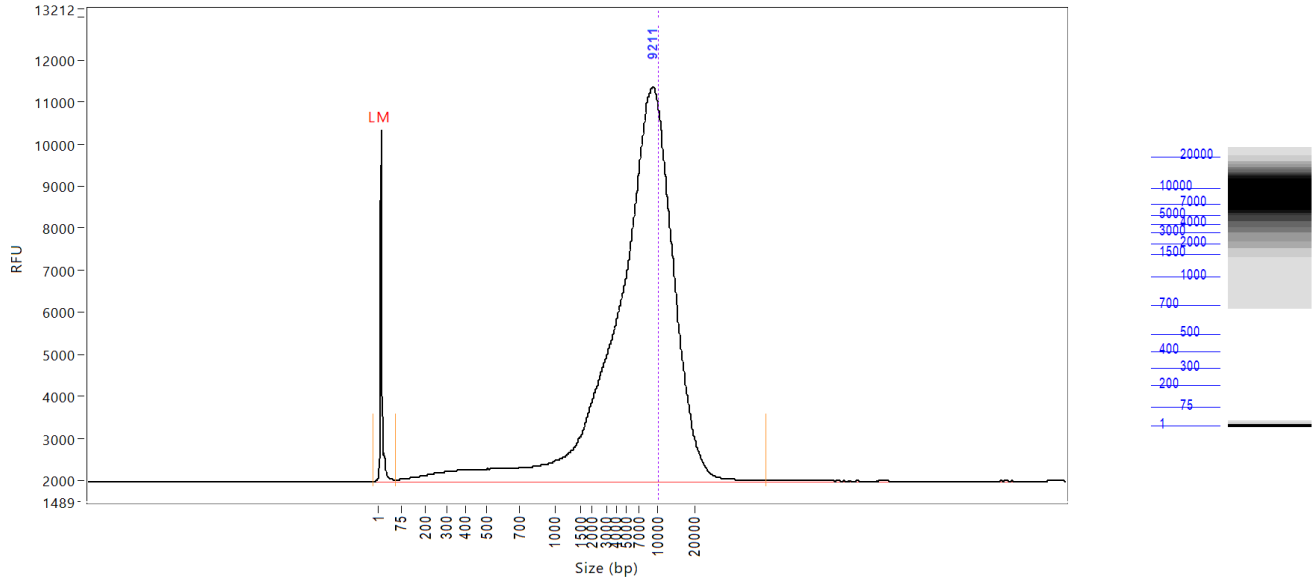

| Peak         | Size (bp) | Conc. (ng/uL) | From (bp) | To (bp) | Avg. Size (bp) | CV%    | RFU  | Corr. Peak Area |
|--------------|-----------|---------------|-----------|---------|----------------|--------|------|-----------------|
| 1            | 1 (LM)    | 0.0328        | 0         | 52      | 3              | 257.35 | 8369 | 59.035          |
| 2            | 9211      | 8.1644        | 52        | 39328   | 7511           | 66.33  | 9366 | 1224.450        |
| TIC:         |           | 8.1644        | ng/uL     |         |                |        |      |                 |
| TIM:         |           | 1.7895        | nmole/L   |         |                |        |      |                 |
| Total Conc.: |           | 8.1902        | ng/uL     |         |                |        |      |                 |
| GQN:         |           | 2.8           |           |         |                |        |      |                 |

Sample Peak Width (sec): 50    Sample Min Peak Height: 50    Sample Baseline V to V?: Y    Sample Baseline V to V pts: 3  
 Sample Filter: Binomial    # of Pts for Filter: 3    Sample Start Region (min): 0    Sample End Region (min): 50  
 Manual Baseline Start (min): 6    Manual Baseline End (min): 48  
 Marker Peak Width (sec): 5    Marker Min Peak Height: 200    Marker Baseline V to V?: Y    Marker Baseline V to V pts: 3  
 Lower Marker Selection: First Peak > 200 RFU    Upper Marker Selection: Last Peak > 200 RFU  
 Ladder Size (bp): 1, 75, 200, 300, 400, 500, 700, 1000, 1500, 2000, 3000, 4000, 5000, 7000, 10000, 20000  
 Quantification Using: Ladder    Final Concentration (ng/uL): 1.0417    Dilution Factor: 12.0  
 Size Threshold (b.p.): 10000

**Data File:** 2019 06 18 14H 35M.raw  
**Sample:** 103613-001-127 (20x dil.)  
**Well Location:** G4

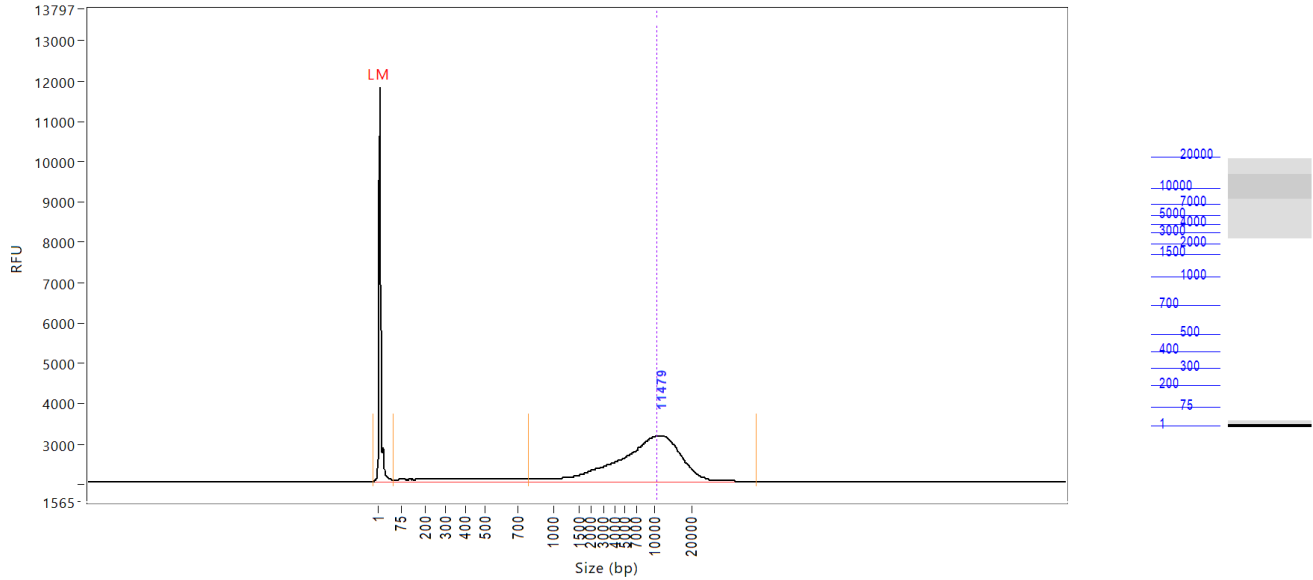

| Peak         | Size (bp) | Conc. (ng/uL) | From (bp) | To (bp) | Avg. Size (bp) | CV%    | RFU  | Corr. Peak Area |
|--------------|-----------|---------------|-----------|---------|----------------|--------|------|-----------------|
| 1            | 1 (LM)    | 0.0328        | 0         | 49      | 2              | 369.96 | 9781 | 69.998          |
| 2            | 11479     | 0.9595        | 779       | 37516   | 9026           | 62.76  | 1149 | 170.622         |
| TIC:         |           | 0.9595        | ng/uL     |         |                |        |      |                 |
| TIM:         |           | 0.1750        | nmole/L   |         |                |        |      |                 |
| Total Conc.: |           | 1.0997        | ng/uL     |         |                |        |      |                 |
| GQN:         |           | 3.5           |           |         |                |        |      |                 |

Sample Peak Width (sec): 50    Sample Min Peak Height: 50    Sample Baseline V to V?: Y    Sample Baseline V to V pts: 3  
Sample Filter: Binomial    # of Pts for Filter: 3    Sample Start Region (min): 0    Sample End Region (min): 50  
Manual Baseline Start (min): 6    Manual Baseline End (min): 48  
Marker Peak Width (sec): 5    Marker Min Peak Height: 200    Marker Baseline V to V?: Y    Marker Baseline V to V pts: 3  
Lower Marker Selection: First Peak > 200 RFU    Upper Marker Selection: Last Peak > 200 RFU  
Ladder Size (bp): 1, 75, 200, 300, 400, 500, 700, 1000, 1500, 2000, 3000, 4000, 5000, 7000, 10000, 20000  
Quantification Using: Ladder    Final Concentration (ng/uL): 1.0417    Dilution Factor: 12.0  
Size Threshold (b.p.): 10000

**Data File:** 2019 06 18 14H 35M.raw  
**Sample:** 103613-001-128 (20x dil.)  
**Well Location:** H4

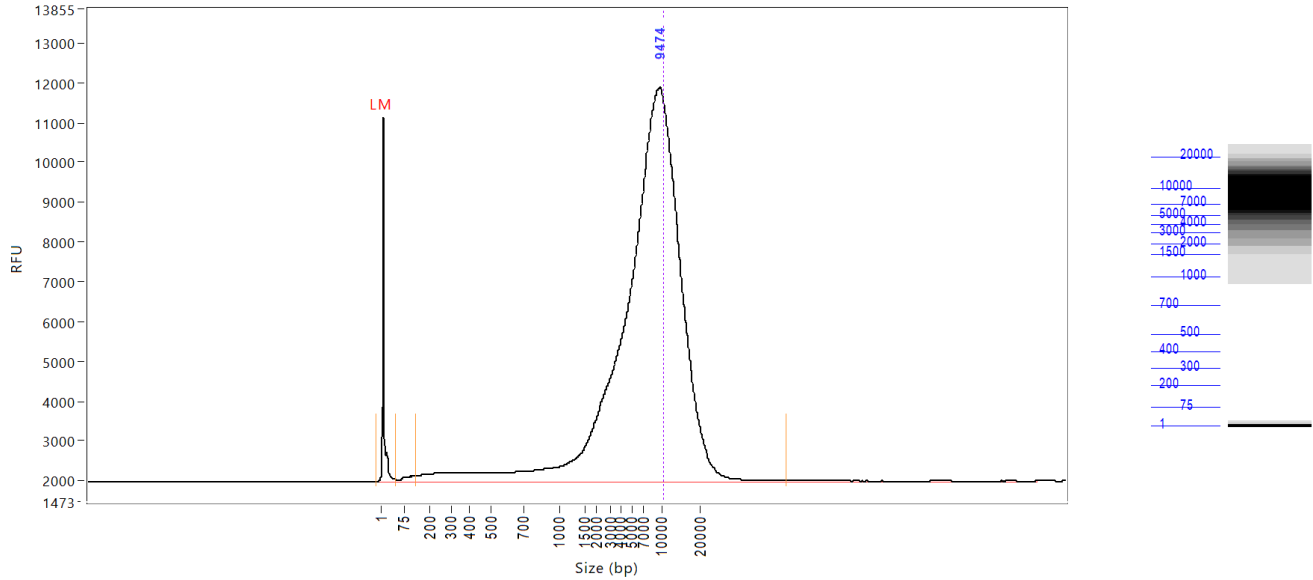

| Peak         | Size (bp) | Conc. (ng/uL) | From (bp) | To (bp) | Avg. Size (bp) | CV%    | RFU  | Corr. Peak Area |
|--------------|-----------|---------------|-----------|---------|----------------|--------|------|-----------------|
| 1            | 1 (LM)    | 0.0328        | 0         | 46      | 2              | 277.85 | 9150 | 63.888          |
| 2            | 9474      | 7.7474        | 129       | 43038   | 8129           | 63.34  | 9894 | 1257.417        |
| TIC:         |           | 7.7474        | ng/uL     |         |                |        |      |                 |
| TIM:         |           | 1.5690        | nmole/L   |         |                |        |      |                 |
| Total Conc.: |           | 7.8234        | ng/uL     |         |                |        |      |                 |
| GQN:         |           | 3.1           |           |         |                |        |      |                 |

Sample Peak Width (sec): 50    Sample Min Peak Height: 50    Sample Baseline V to V?: Y    Sample Baseline V to V pts: 3  
Sample Filter: Binomial    # of Pts for Filter: 3    Sample Start Region (min): 0    Sample End Region (min): 50  
Manual Baseline Start (min): 6    Manual Baseline End (min): 48  
Marker Peak Width (sec): 5    Marker Min Peak Height: 200    Marker Baseline V to V?: Y    Marker Baseline V to V pts: 3  
Lower Marker Selection: First Peak > 200 RFU    Upper Marker Selection: Last Peak > 200 RFU  
Ladder Size (bp): 1, 75, 200, 300, 400, 500, 700, 1000, 1500, 2000, 3000, 4000, 5000, 7000, 10000, 20000  
Quantification Using: Ladder    Final Concentration (ng/uL): 1.0417    Dilution Factor: 12.0  
Size Threshold (b.p.): 10000



Data File: 2019 06 18 14H 35M.raw

Sample: 103613-001-129 (20x dil.)

Well Location: A5

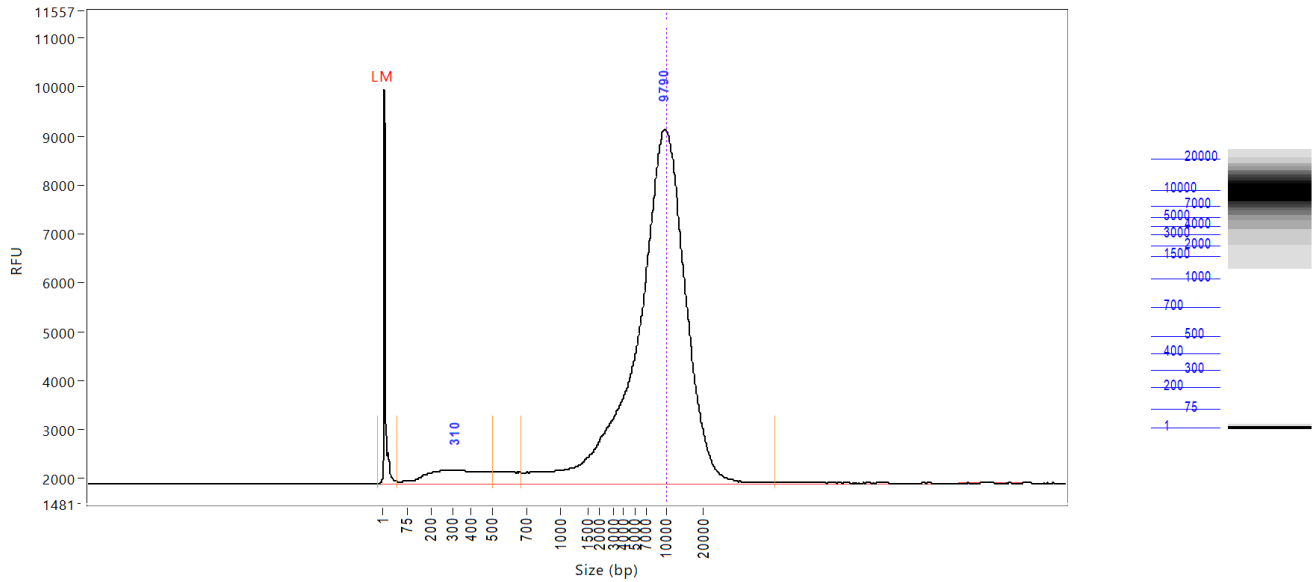

| Peak         | Size (bp) | Conc. (ng/uL) | From (bp) | To (bp) | Avg. Size (bp) | CV%    | RFU  | Corr. Peak Area |
|--------------|-----------|---------------|-----------|---------|----------------|--------|------|-----------------|
| 1            | 1 (LM)    | 0.0328        | 0         | 43      | 2              | 344.59 | 8055 | 54.245          |
| 2            | 310       | 0.3609        | 43        | 494     | 298            | 38.09  | 255  | 49.739          |
| 3            | 9790      | 5.8692        | 667       | 38896   | 9099           | 54.38  | 7229 | 808.802         |
| TIC:         |           | 6.2301        | ng/uL     |         |                |        |      |                 |
| TIM:         |           | 3.0543        | nmole/L   |         |                |        |      |                 |
| Total Conc.: |           | 6.3598        | ng/uL     |         |                |        |      |                 |
| GQN:         |           | 3.6           |           |         |                |        |      |                 |

Sample Peak Width (sec): 50    Sample Min Peak Height: 50    Sample Baseline V to V?: Y    Sample Baseline V to V pts: 3  
 Sample Filter: Binomial    # of Pts for Filter: 3    Sample Start Region (min): 0    Sample End Region (min): 50  
 Manual Baseline Start (min): 6    Manual Baseline End (min): 48  
 Marker Peak Width (sec): 5    Marker Min Peak Height: 200    Marker Baseline V to V?: Y    Marker Baseline V to V pts: 3  
 Lower Marker Selection: First Peak > 200 RFU    Upper Marker Selection: Last Peak > 200 RFU  
 Ladder Size (bp): 1, 75, 200, 300, 400, 500, 700, 1000, 1500, 2000, 3000, 4000, 5000, 7000, 10000, 20000  
 Quantification Using: Ladder    Final Concentration (ng/uL): 1.0417    Dilution Factor: 12.0  
 Size Threshold (b.p.): 10000

**Data File:** 2019 06 18 14H 35M.raw  
**Sample:** 103613-001-130 (20x dil.)  
**Well Location:** B5

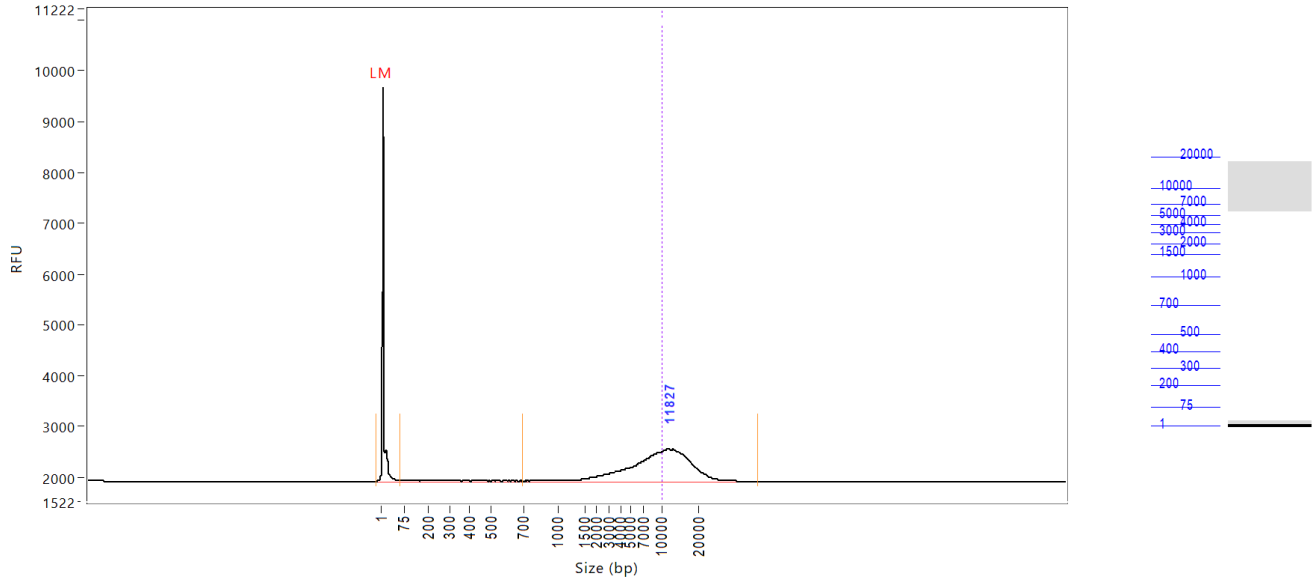

| Peak         | Size (bp) | Conc. (ng/uL) | From (bp) | To (bp) | Avg. Size (bp) | CV%    | RFU  | Corr. Peak Area |
|--------------|-----------|---------------|-----------|---------|----------------|--------|------|-----------------|
| 1            | 1 (LM)    | 0.0328        | 0         | 57      | 2              | 311.14 | 7755 | 53.879          |
| 2            | 11827     | 0.6749        | 688       | 35790   | 10128          | 57.25  | 644  | 92.375          |
| TIC:         |           | 0.6749        | ng/uL     |         |                |        |      |                 |
| TIM:         |           | 0.1097        | nmole/L   |         |                |        |      |                 |
| Total Conc.: |           | 0.7293        | ng/uL     |         |                |        |      |                 |
| GQN:         |           | 4.4           |           |         |                |        |      |                 |

Sample Peak Width (sec): 50    Sample Min Peak Height: 50    Sample Baseline V to V?: Y    Sample Baseline V to V pts: 3  
Sample Filter: Binomial    # of Pts for Filter: 3    Sample Start Region (min): 0    Sample End Region (min): 50  
Manual Baseline Start (min): 6    Manual Baseline End (min): 48  
Marker Peak Width (sec): 5    Marker Min Peak Height: 200    Marker Baseline V to V?: Y    Marker Baseline V to V pts: 3  
Lower Marker Selection: First Peak > 200 RFU    Upper Marker Selection: Last Peak > 200 RFU  
Ladder Size (bp): 1, 75, 200, 300, 400, 500, 700, 1000, 1500, 2000, 3000, 4000, 5000, 7000, 10000, 20000  
Quantification Using: Ladder    Final Concentration (ng/uL): 1.0417    Dilution Factor: 12.0  
Size Threshold (b.p.): 10000

Data File: 2019 06 18 14H 35M.raw

Sample: 103613-001-131 (20x dil.)

Well Location: C5

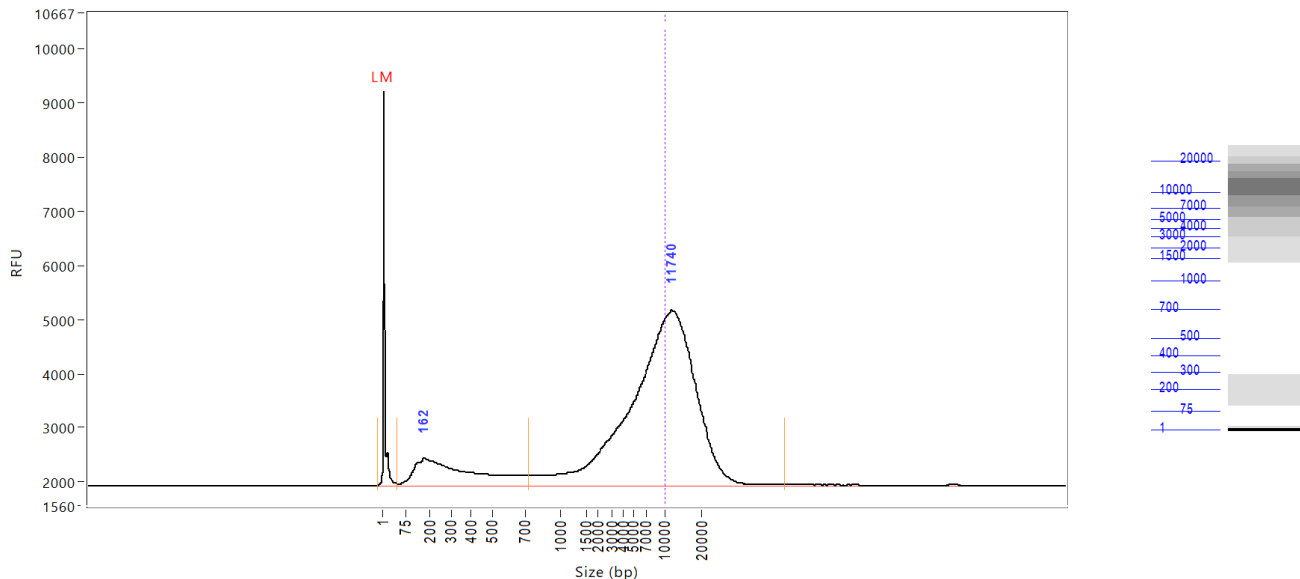

| Peak         | Size (bp) | Conc. (ng/uL) | From (bp) | To (bp) | Avg. Size (bp) | CV%    | RFU  | Corr. Peak Area |
|--------------|-----------|---------------|-----------|---------|----------------|--------|------|-----------------|
| 1            | 1 (LM)    | 0.0328        | 0         | 44      | 2              | 395.22 | 7283 | 52.157          |
| 2            | 162       | 0.6937        | 44        | 718     | 311            | 54.40  | 499  | 91.916          |
| 3            | 11740     | 3.8993        | 718       | 42262   | 9943           | 62.05  | 3238 | 516.658         |
| TIC:         |           | 4.5930        | ng/uL     |         |                |        |      |                 |
| TIM:         |           | 4.3149        | nmole/L   |         |                |        |      |                 |
| Total Conc.: |           | 4.6247        | ng/uL     |         |                |        |      |                 |
| GQN:         |           | 3.8           |           |         |                |        |      |                 |

Sample Peak Width (sec): 50    Sample Min Peak Height: 50    Sample Baseline V to V?: Y    Sample Baseline V to V pts: 3  
Sample Filter: Binomial    # of Pts for Filter: 3    Sample Start Region (min): 0    Sample End Region (min): 50  
Manual Baseline Start (min): 6    Manual Baseline End (min): 48  
Marker Peak Width (sec): 5    Marker Min Peak Height: 200    Marker Baseline V to V?: Y    Marker Baseline V to V pts: 3  
Lower Marker Selection: First Peak > 200 RFU    Upper Marker Selection: Last Peak > 200 RFU  
Ladder Size (bp): 1, 75, 200, 300, 400, 500, 700, 1000, 1500, 2000, 3000, 4000, 5000, 7000, 10000, 20000  
Quantification Using: Ladder    Final Concentration (ng/uL): 1.0417    Dilution Factor: 12.0  
Size Threshold (b.p.): 10000

**Data File:** 2019 06 18 14H 35M.raw  
**Sample:** 103613-001-132 (20x dil.)  
**Well Location:** D5

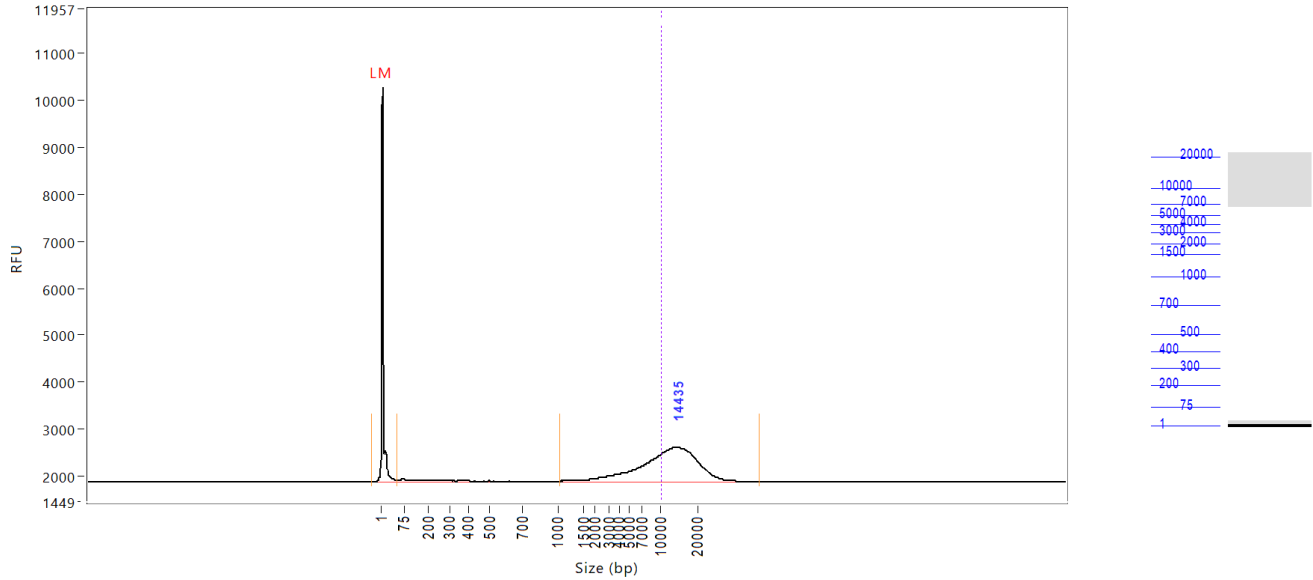

| Peak         | Size (bp) | Conc. (ng/uL) | From (bp) | To (bp) | Avg. Size (bp) | CV%    | RFU  | Corr. Peak Area |
|--------------|-----------|---------------|-----------|---------|----------------|--------|------|-----------------|
| 1            | 1 (LM)    | 0.0328        | 0         | 52      | 2              | 367.93 | 8401 | 59.306          |
| 2            | 14435     | 0.7239        | 1038      | 36308   | 12162          | 49.76  | 742  | 109.062         |
| TIC:         |           | 0.7239        | ng/uL     |         |                |        |      |                 |
| TIM:         |           | 0.0980        | nmole/L   |         |                |        |      |                 |
| Total Conc.: |           | 0.7954        | ng/uL     |         |                |        |      |                 |
| GQN:         |           | 5.5           |           |         |                |        |      |                 |

Sample Peak Width (sec): 50    Sample Min Peak Height: 50    Sample Baseline V to V?: Y    Sample Baseline V to V pts: 3  
Sample Filter: Binomial    # of Pts for Filter: 3    Sample Start Region (min): 0    Sample End Region (min): 50  
Manual Baseline Start (min): 6    Manual Baseline End (min): 48  
Marker Peak Width (sec): 5    Marker Min Peak Height: 200    Marker Baseline V to V?: Y    Marker Baseline V to V pts: 3  
Lower Marker Selection: First Peak > 200 RFU    Upper Marker Selection: Last Peak > 200 RFU  
Ladder Size (bp): 1, 75, 200, 300, 400, 500, 700, 1000, 1500, 2000, 3000, 4000, 5000, 7000, 10000, 20000  
Quantification Using: Ladder    Final Concentration (ng/uL): 1.0417    Dilution Factor: 12.0  
Size Threshold (b.p.): 10000

**Data File:** 2019 06 18 14H 35M.raw  
**Sample:** 103613-001-133 (20x dil.)  
**Well Location:** E5

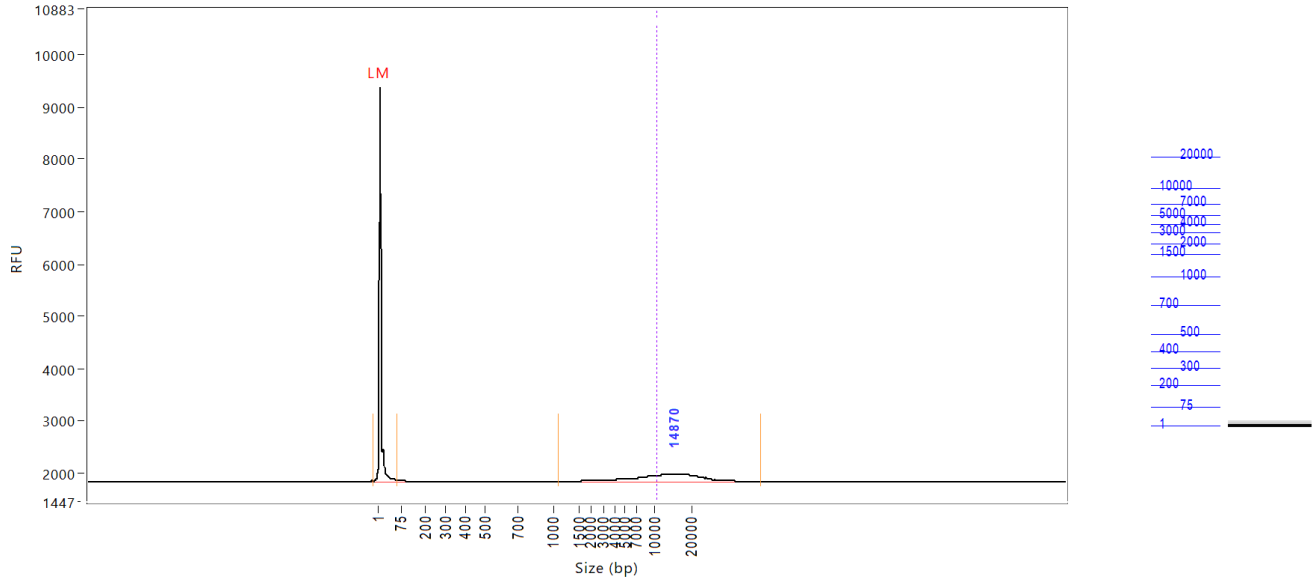

| Peak         | Size (bp) | Conc. (ng/uL) | From (bp) | To (bp) | Avg. Size (bp) | CV%    | RFU  | Corr. Peak Area |
|--------------|-----------|---------------|-----------|---------|----------------|--------|------|-----------------|
| 1            | 1 (LM)    | 0.0328        | 0         | 60      | 3              | 262.71 | 7541 | 54.432          |
| 2            | 14870     | 0.1952        | 1101      | 38638   | 13416          | 55.82  | 146  | 26.986          |
| TIC:         |           | 0.1952        | ng/uL     |         |                |        |      |                 |
| TIM:         |           | 0.0239        | nmole/L   |         |                |        |      |                 |
| Total Conc.: |           | 0.2387        | ng/uL     |         |                |        |      |                 |
| GQN:         |           | 5.5           |           |         |                |        |      |                 |

Sample Peak Width (sec): 50    Sample Min Peak Height: 50    Sample Baseline V to V?: Y    Sample Baseline V to V pts: 3  
Sample Filter: Binomial    # of Pts for Filter: 3    Sample Start Region (min): 0    Sample End Region (min): 50  
Manual Baseline Start (min): 6    Manual Baseline End (min): 48  
Marker Peak Width (sec): 5    Marker Min Peak Height: 200    Marker Baseline V to V?: Y    Marker Baseline V to V pts: 3  
Lower Marker Selection: First Peak > 200 RFU    Upper Marker Selection: Last Peak > 200 RFU  
Ladder Size (bp): 1, 75, 200, 300, 400, 500, 700, 1000, 1500, 2000, 3000, 4000, 5000, 7000, 10000, 20000  
Quantification Using: Ladder    Final Concentration (ng/uL): 1.0417    Dilution Factor: 12.0  
Size Threshold (b.p.): 10000

**Data File:** 2019 06 18 14H 35M.raw  
**Sample:** 103613-001-134 (20x dil.)  
**Well Location:** F5

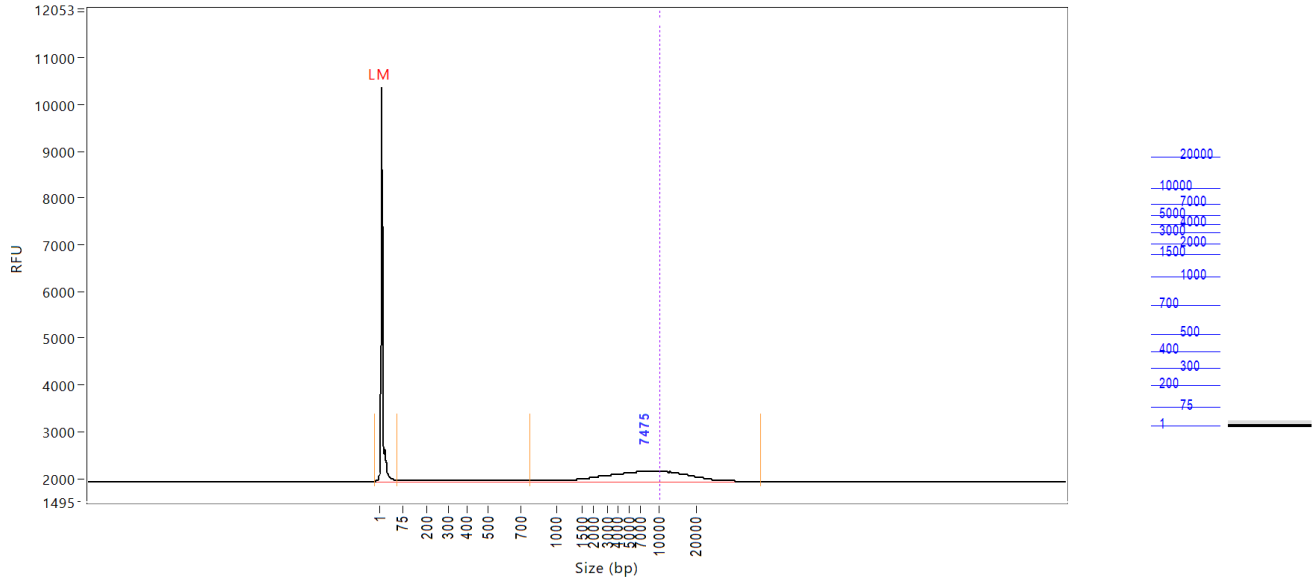

| Peak         | Size (bp) | Conc. (ng/uL) | From (bp) | To (bp) | Avg. Size (bp) | CV%    | RFU  | Corr. Peak Area |
|--------------|-----------|---------------|-----------|---------|----------------|--------|------|-----------------|
| 1            | 1 (LM)    | 0.0328        | 0         | 55      | 2              | 377.58 | 8443 | 60.643          |
| 2            | 7475      | 0.3142        | 768       | 37343   | 8782           | 77.22  | 226  | 48.400          |
| TIC:         |           | 0.3142        | ng/uL     |         |                |        |      |                 |
| TIM:         |           | 0.0589        | nmole/L   |         |                |        |      |                 |
| Total Conc.: |           | 0.3825        | ng/uL     |         |                |        |      |                 |
| GQN:         |           | 2.9           |           |         |                |        |      |                 |

Sample Peak Width (sec): 50    Sample Min Peak Height: 50    Sample Baseline V to V?: Y    Sample Baseline V to V pts: 3  
Sample Filter: Binomial    # of Pts for Filter: 3    Sample Start Region (min): 0    Sample End Region (min): 50  
Manual Baseline Start (min): 6    Manual Baseline End (min): 48  
Marker Peak Width (sec): 5    Marker Min Peak Height: 200    Marker Baseline V to V?: Y    Marker Baseline V to V pts: 3  
Lower Marker Selection: First Peak > 200 RFU    Upper Marker Selection: Last Peak > 200 RFU  
Ladder Size (bp): 1, 75, 200, 300, 400, 500, 700, 1000, 1500, 2000, 3000, 4000, 5000, 7000, 10000, 20000  
Quantification Using: Ladder    Final Concentration (ng/uL): 1.0417    Dilution Factor: 12.0  
Size Threshold (b.p.): 10000

**Data File:** 2019 06 18 14H 35M.raw  
**Sample:** 103613-001-135 (20x dil.)  
**Well Location:** G5

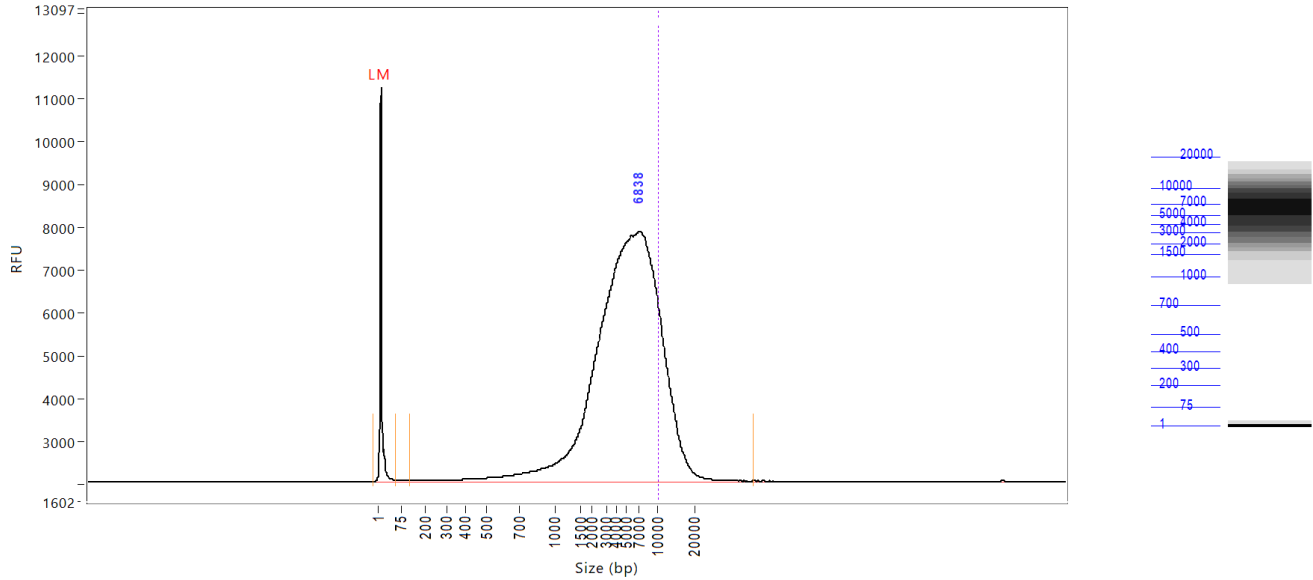

| Peak         | Size (bp) | Conc. (ng/uL) | From (bp) | To (bp) | Avg. Size (bp) | CV%    | RFU  | Corr. Peak Area |
|--------------|-----------|---------------|-----------|---------|----------------|--------|------|-----------------|
| 1            | 1 (LM)    | 0.0328        | 0         | 51      | 2              | 351.35 | 9192 | 65.005          |
| 2            | 6838      | 5.1028        | 116       | 35876   | 5850           | 67.46  | 5847 | 842.672         |
| TIC:         |           | 5.1028        | ng/uL     |         |                |        |      |                 |
| TIM:         |           | 1.4360        | nmole/L   |         |                |        |      |                 |
| Total Conc.: |           | 5.1356        | ng/uL     |         |                |        |      |                 |
| GQN:         |           | 1.4           |           |         |                |        |      |                 |

Sample Peak Width (sec): 50    Sample Min Peak Height: 50    Sample Baseline V to V?: Y    Sample Baseline V to V pts: 3  
Sample Filter: Binomial    # of Pts for Filter: 3    Sample Start Region (min): 0    Sample End Region (min): 50  
Manual Baseline Start (min): 6    Manual Baseline End (min): 48  
Marker Peak Width (sec): 5    Marker Min Peak Height: 200    Marker Baseline V to V?: Y    Marker Baseline V to V pts: 3  
Lower Marker Selection: First Peak > 200 RFU    Upper Marker Selection: Last Peak > 200 RFU  
Ladder Size (bp): 1, 75, 200, 300, 400, 500, 700, 1000, 1500, 2000, 3000, 4000, 5000, 7000, 10000, 20000  
Quantification Using: Ladder    Final Concentration (ng/uL): 1.0417    Dilution Factor: 12.0  
Size Threshold (b.p.): 10000

**Data File:** 2019 06 18 14H 35M.raw  
**Sample:** 103613-001-136 (20x dil.)  
**Well Location:** H5

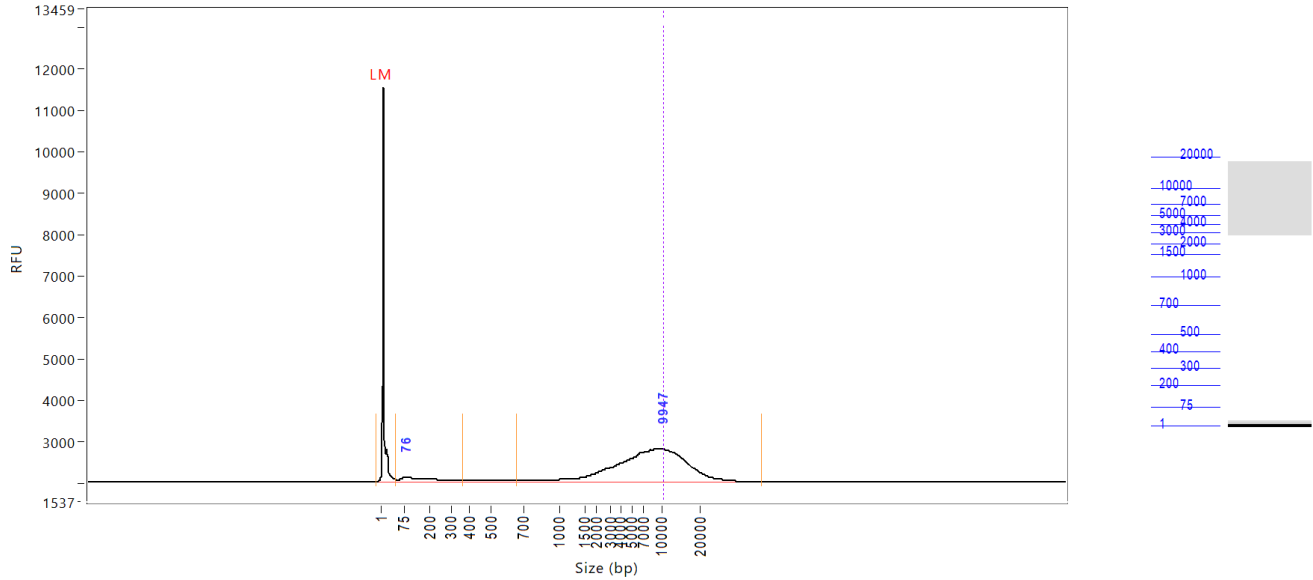

| Peak         | Size (bp) | Conc. (ng/uL) | From (bp) | To (bp) | Avg. Size (bp) | CV%    | RFU  | Corr. Peak Area |
|--------------|-----------|---------------|-----------|---------|----------------|--------|------|-----------------|
| 1            | 1 (LM)    | 0.0328        | 0         | 45      | 2              | 306.22 | 9533 | 66.455          |
| 2            | 76        | 0.0715        | 45        | 362     | 169            | 53.22  | 105  | 12.066          |
| 3            | 9947      | 0.7928        | 657       | 36739   | 8665           | 67.28  | 795  | 133.842         |
| TIC:         |           | 0.8643        | ng/uL     |         |                |        |      |                 |
| TIM:         |           | 0.8458        | nmole/L   |         |                |        |      |                 |
| Total Conc.: |           | 0.9127        | ng/uL     |         |                |        |      |                 |
| GQN:         |           | 3.1           |           |         |                |        |      |                 |

Sample Peak Width (sec): 50    Sample Min Peak Height: 50    Sample Baseline V to V?: Y    Sample Baseline V to V pts: 3  
Sample Filter: Binomial    # of Pts for Filter: 3    Sample Start Region (min): 0    Sample End Region (min): 50  
Manual Baseline Start (min): 6    Manual Baseline End (min): 48  
Marker Peak Width (sec): 5    Marker Min Peak Height: 200    Marker Baseline V to V?: Y    Marker Baseline V to V pts: 3  
Lower Marker Selection: First Peak > 200 RFU    Upper Marker Selection: Last Peak > 200 RFU  
Ladder Size (bp): 1, 75, 200, 300, 400, 500, 700, 1000, 1500, 2000, 3000, 4000, 5000, 7000, 10000, 20000  
Quantification Using: Ladder    Final Concentration (ng/uL): 1.0417    Dilution Factor: 12.0  
Size Threshold (b.p.): 10000



**Data File:** 2019 06 18 14H 35M.raw  
**Sample:** 103613-001-137 (20x dil.)  
**Well Location:** A6

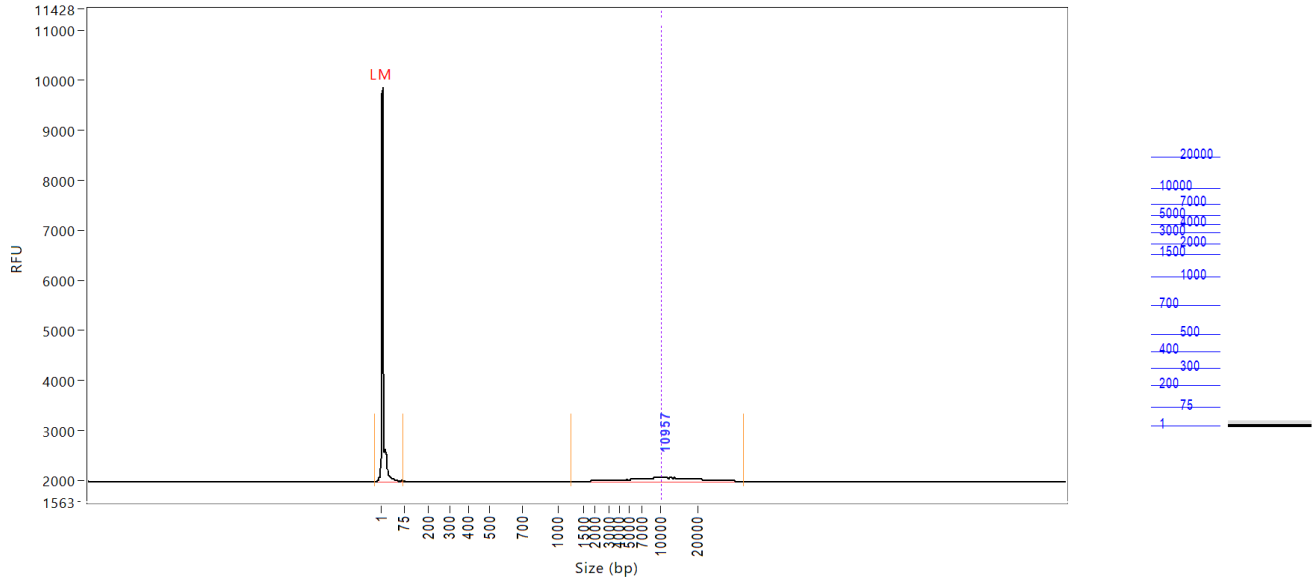

| Peak         | Size (bp) | Conc. (ng/uL) | From (bp) | To (bp) | Avg. Size (bp) | CV%    | RFU  | Corr. Peak Area |
|--------------|-----------|---------------|-----------|---------|----------------|--------|------|-----------------|
| 1            | 1 (LM)    | 0.0328        | 0         | 71      | 2              | 375.78 | 7888 | 56.511          |
| 2            | 10957     | 0.1085        | 1269      | 32339   | 11501          | 61.96  | 77   | 15.579          |
| TIC:         |           | 0.1085        | ng/uL     |         |                |        |      |                 |
| TIM:         |           | 0.0155        | nmole/L   |         |                |        |      |                 |
| Total Conc.: |           | 0.1295        | ng/uL     |         |                |        |      |                 |
| GQN:         |           | 4.7           |           |         |                |        |      |                 |

Sample Peak Width (sec): 50    Sample Min Peak Height: 50    Sample Baseline V to V?: Y    Sample Baseline V to V pts: 3  
Sample Filter: Binomial    # of Pts for Filter: 3    Sample Start Region (min): 0    Sample End Region (min): 50  
Manual Baseline Start (min): 6    Manual Baseline End (min): 48  
Marker Peak Width (sec): 5    Marker Min Peak Height: 200    Marker Baseline V to V?: Y    Marker Baseline V to V pts: 3  
Lower Marker Selection: First Peak > 200 RFU    Upper Marker Selection: Last Peak > 200 RFU  
Ladder Size (bp): 1, 75, 200, 300, 400, 500, 700, 1000, 1500, 2000, 3000, 4000, 5000, 7000, 10000, 20000  
Quantification Using: Ladder    Final Concentration (ng/uL): 1.0417    Dilution Factor: 12.0  
Size Threshold (b.p.): 10000

Data File: 2019 06 18 14H 35M.raw

Sample: 103613-001-138 (20x dil.)

Well Location: B6

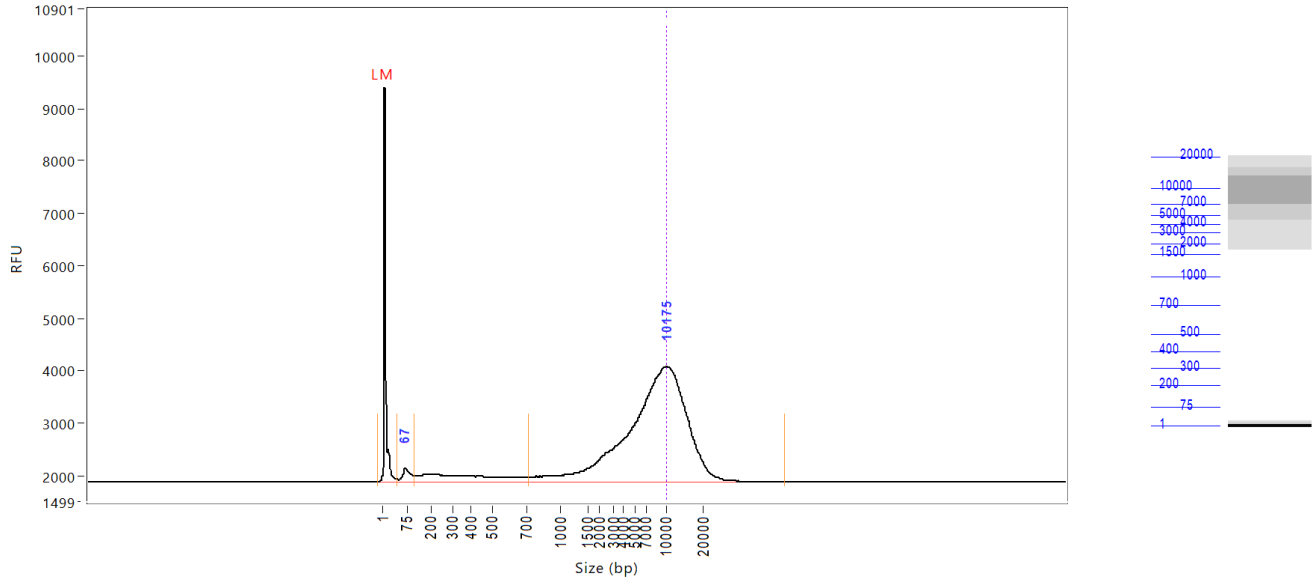

| Peak         | Size (bp) | Conc. (ng/uL) | From (bp) | To (bp) | Avg. Size (bp) | CV%    | RFU  | Corr. Peak Area |
|--------------|-----------|---------------|-----------|---------|----------------|--------|------|-----------------|
| 1            | 1 (LM)    | 0.0328        | 0         | 44      | 3              | 255.39 | 7517 | 52.938          |
| 2            | 67        | 0.0550        | 44        | 111     | 74             | 21.93  | 245  | 7.403           |
| 3            | 10175     | 2.1444        | 709       | 41830   | 8627           | 59.97  | 2195 | 288.384         |
| TIC:         |           | 2.1994        | ng/uL     |         |                |        |      |                 |
| TIM:         |           | 1.6297        | nmole/L   |         |                |        |      |                 |
| Total Conc.: |           | 2.4550        | ng/uL     |         |                |        |      |                 |
| GQN:         |           | 3.1           |           |         |                |        |      |                 |

Sample Peak Width (sec): 50    Sample Min Peak Height: 50    Sample Baseline V to V?: Y    Sample Baseline V to V pts: 3  
 Sample Filter: Binomial    # of Pts for Filter: 3    Sample Start Region (min): 0    Sample End Region (min): 50  
 Manual Baseline Start (min): 6    Manual Baseline End (min): 48  
 Marker Peak Width (sec): 5    Marker Min Peak Height: 200    Marker Baseline V to V?: Y    Marker Baseline V to V pts: 3  
 Lower Marker Selection: First Peak > 200 RFU    Upper Marker Selection: Last Peak > 200 RFU  
 Ladder Size (bp): 1, 75, 200, 300, 400, 500, 700, 1000, 1500, 2000, 3000, 4000, 5000, 7000, 10000, 20000  
 Quantification Using: Ladder    Final Concentration (ng/uL): 1.0417    Dilution Factor: 12.0  
 Size Threshold (b.p.): 10000

**Fragment Analyzer Run Summary:**

**Filename and Data Path:** X:\Lopende Opdrachten\GAII\103613\PrepQC\_NGS HS\_103665\_103165-031\_103613\_103724\_103641 15-56-34\2019 06 21 15H 56M.raw

**Created:** Friday, June 21, 2019 4:25:48 PM

**# of Capillaries:** 42

**Array Serial #:** 112118-01SFS

**Effect Length:** 33 cm

**Array Usage Count:** 228

**FA Version #:** 1.2.0.11

**Device Serial #:** 3003

**METHOD INFORMATION**

**Method Name:** DNF-474-33 - HS NGS Fragment 1-6000bp.mthds

**Gel Prime:** No

**Full Conditioning:** Yes

**Gel Prime to Buffer:** No

**Gel Selection:** Gel 1

**Perform Prerun:** 6.0 kV, 30 sec.

**Rinse:** No

**Marker 1:** No

**Rinse:** Tray: 3, Row: A, # Dips: 1

**Sample Injection:** 5.0 kV, 30 sec.

**Separation:** 6.0 kV, 50.0 min.

**Tray Name:** PrepQC\_NGS HS\_103665\_103165-031\_103613\_103724\_103641

**Analysis Mode:** NGS

**NOTES**

### Gel Image

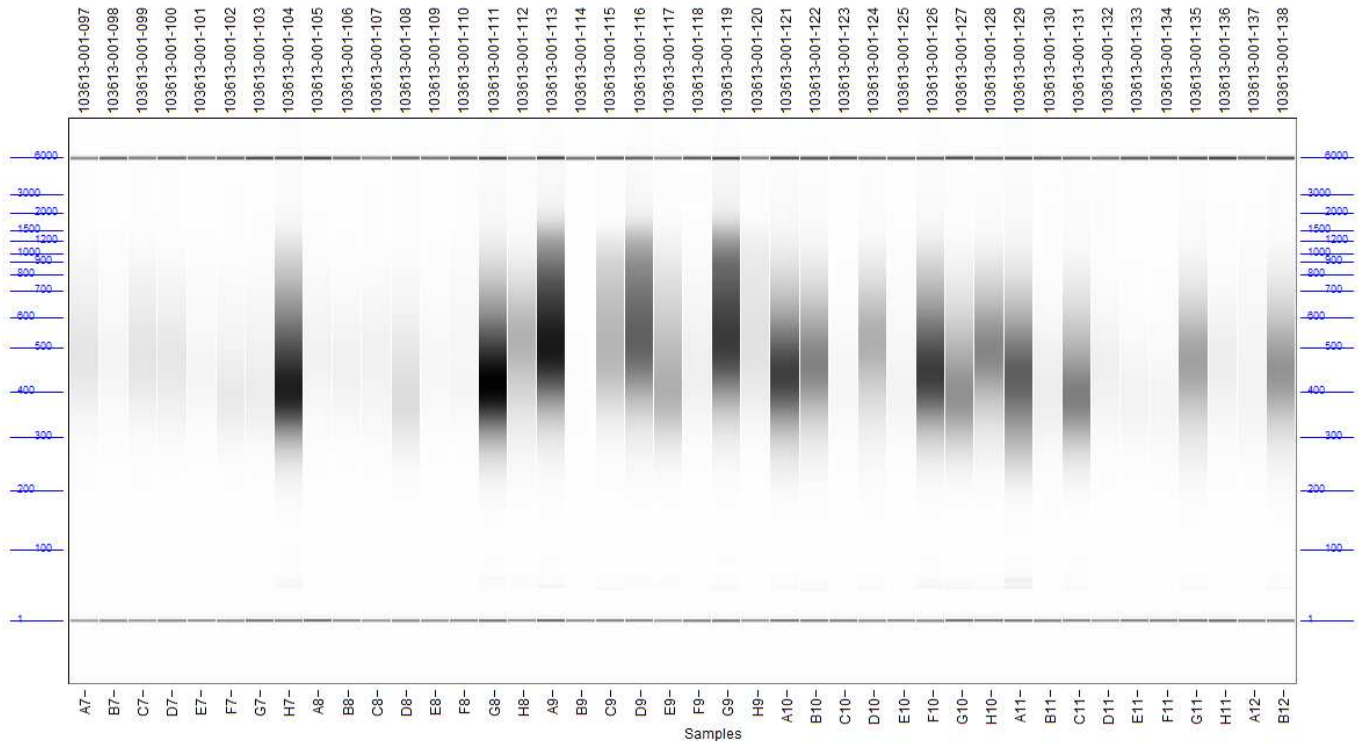

Filename and Data Path: X:\Lopende Opdrachten\GAI\103613\PrepQC\_NGS HS\_103665\_103165-031\_103613\_103724\_103641 15-56-34\2019 06 21 15H 56M.raw

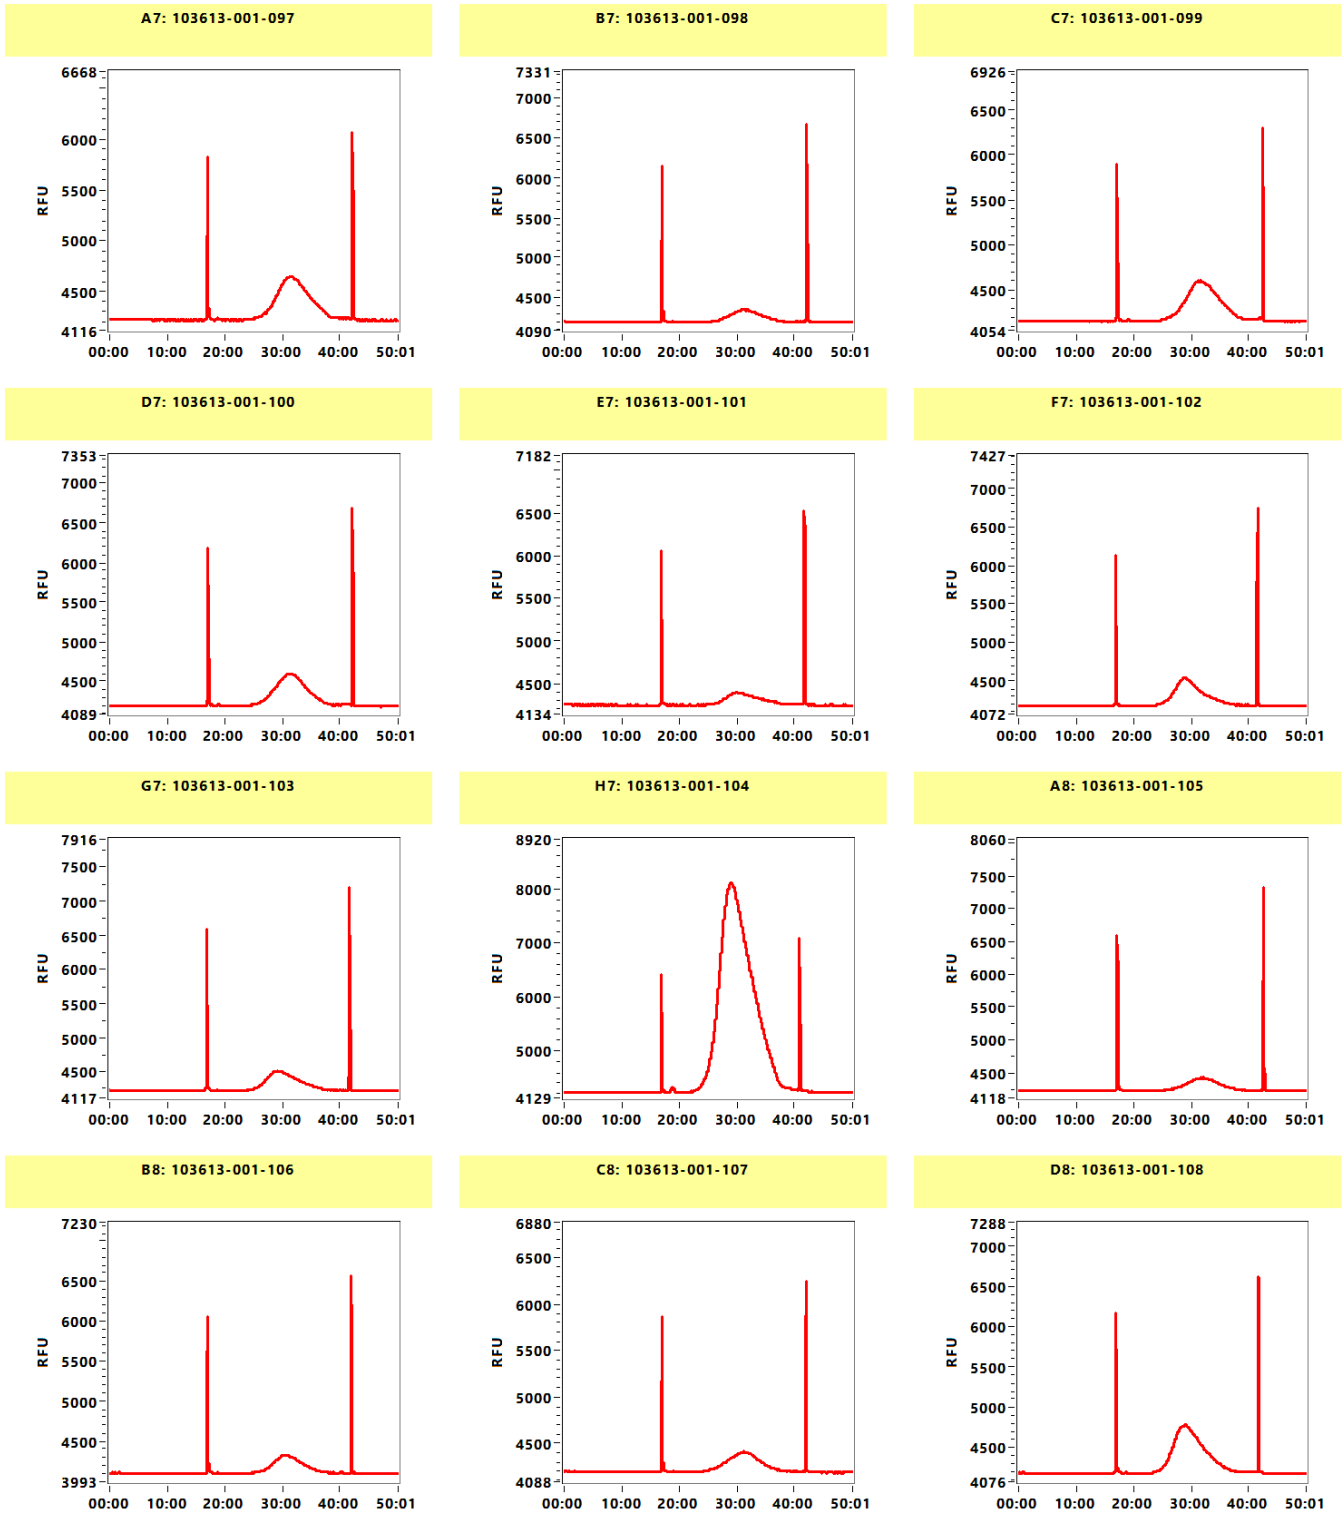

Filename and Data Path: X:\Lopende Opdrachten\GAI\103613\PrepQC\_NGS HS\_103665\_103165-031\_103613\_103724\_103641 15-56-34\2019 06 21 15H 56M.raw

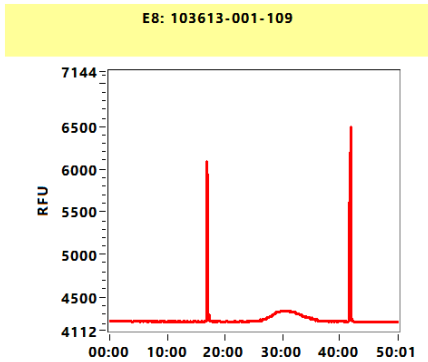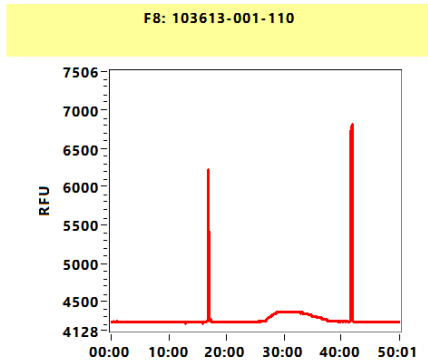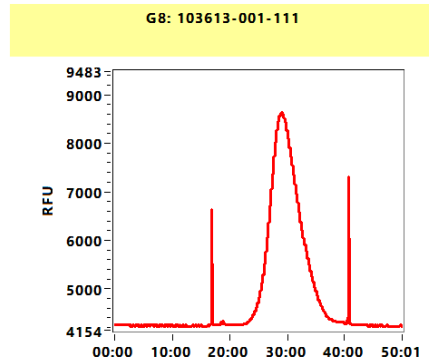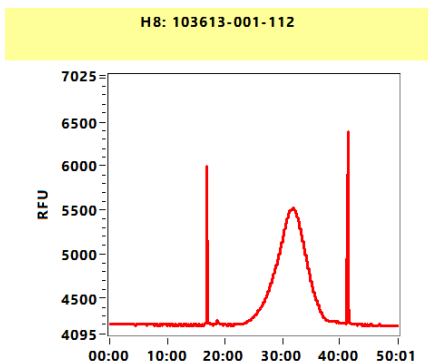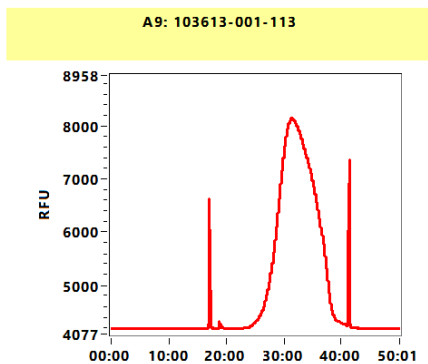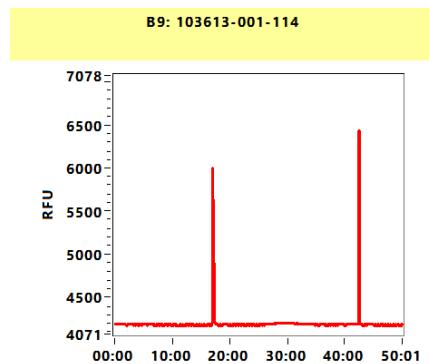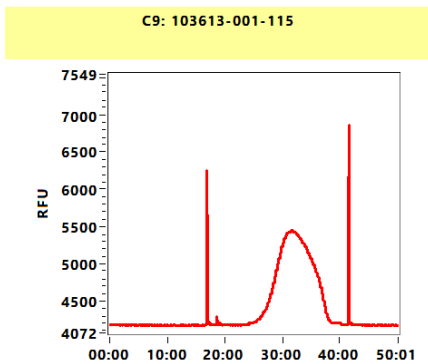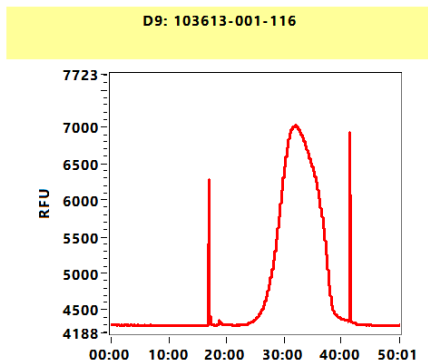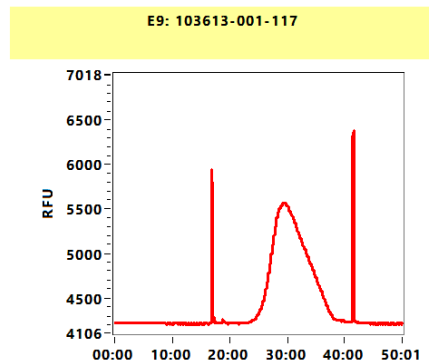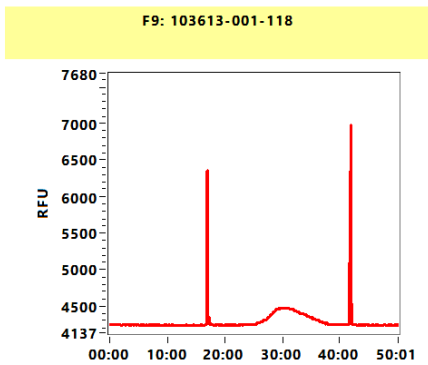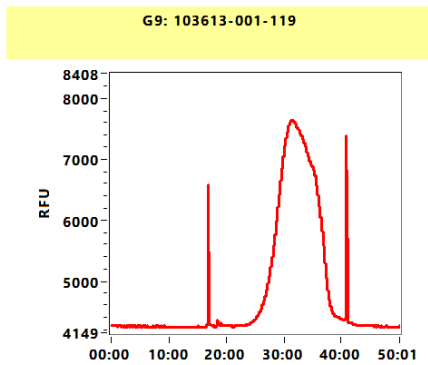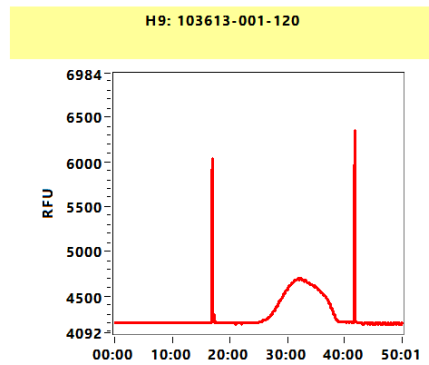

Filename and Data Path: X:\Lopende Opdrachten\GAI\103613\PrepQC\_NGS HS\_103665\_103165-031\_103613\_103724\_103641 15-56-34\2019 06 21 15H 56M.raw

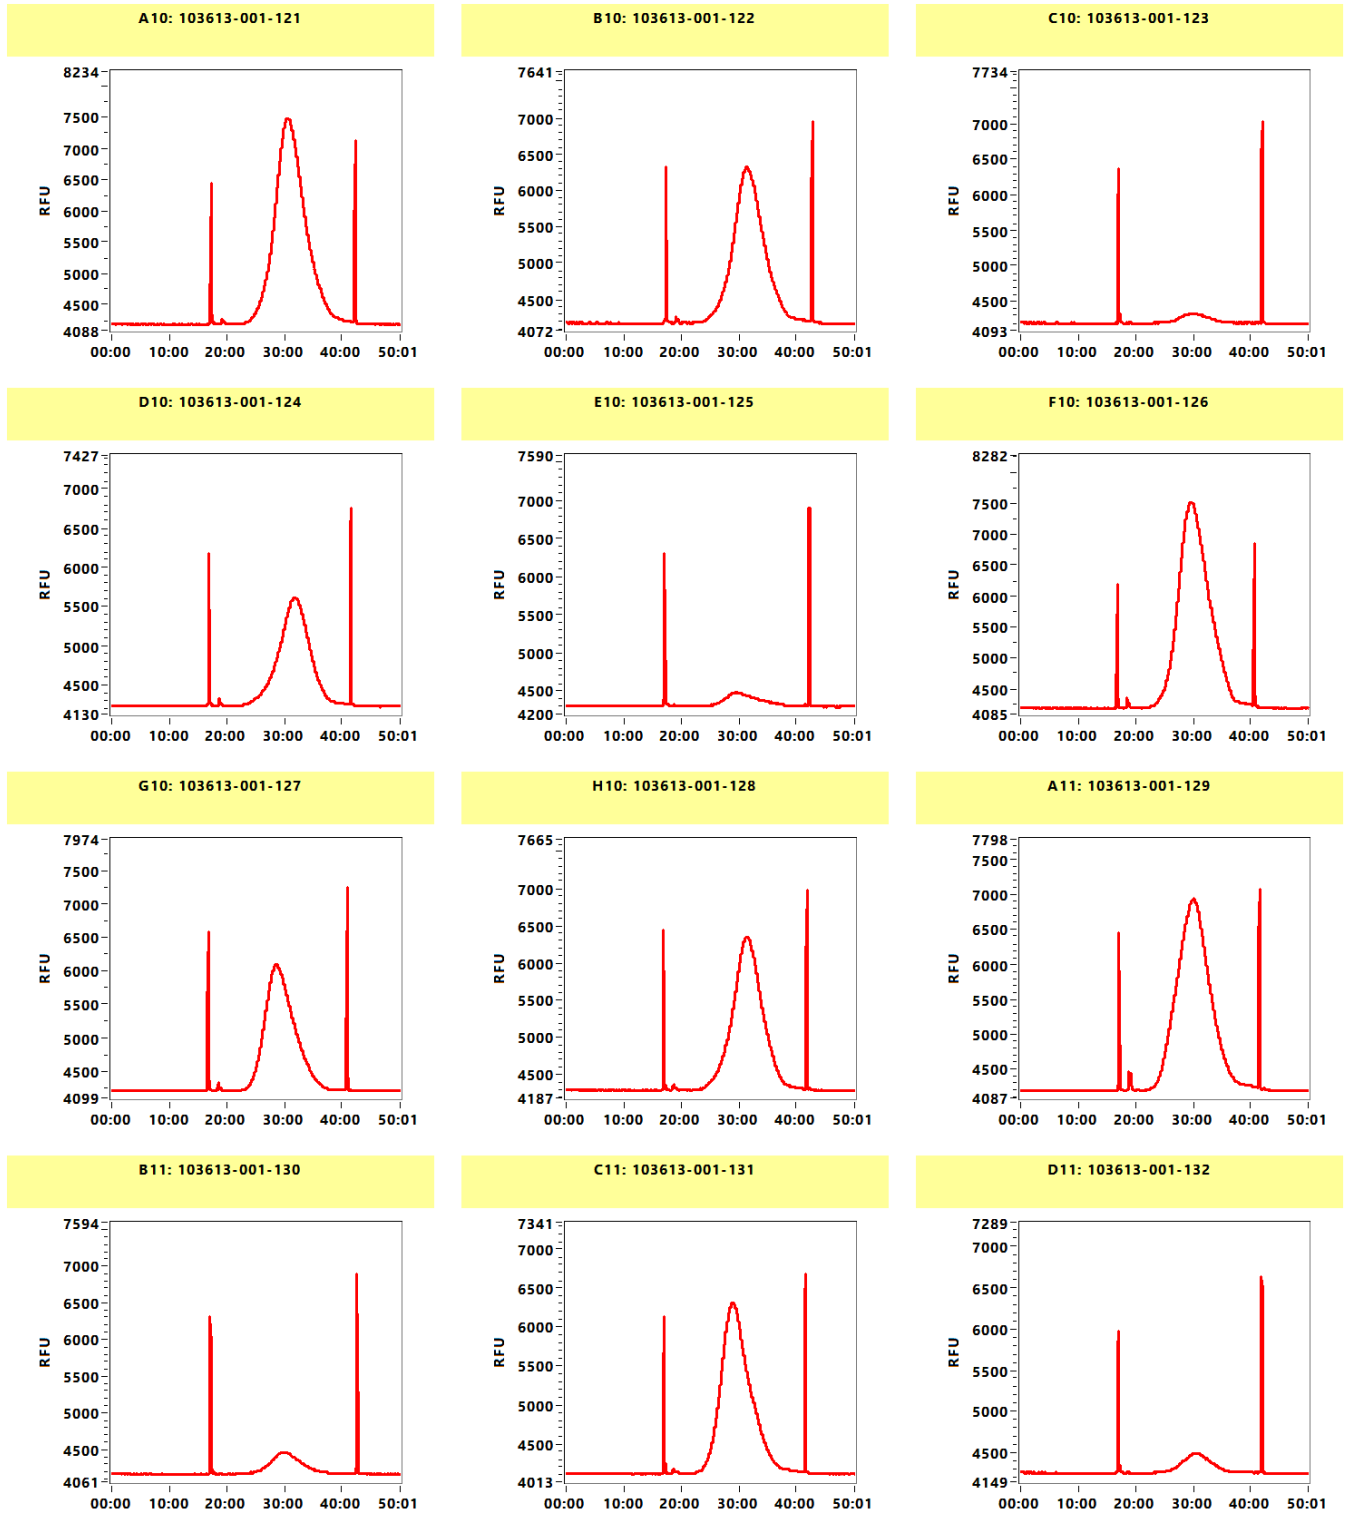

Filename and Data Path: X:\Lopende Opdrachten\GAI\103613\PrepQC\_NGS HS\_103665\_103165-031\_103613\_103724\_103641 15-56-34\2019 06 21 15H 56M.raw

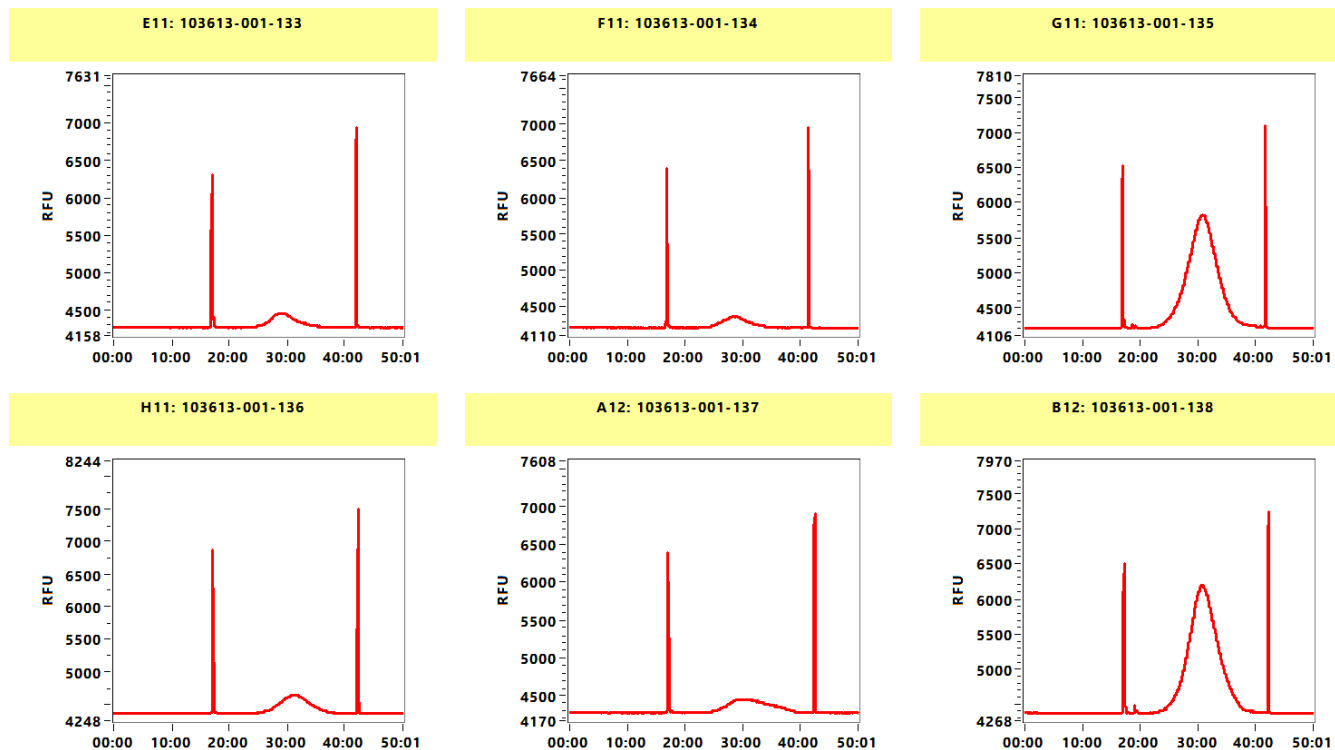



**Sample:** 103613-001-097

**Well Location:** A7

**Created:** Friday, June 21, 2019 4:25:48 PM

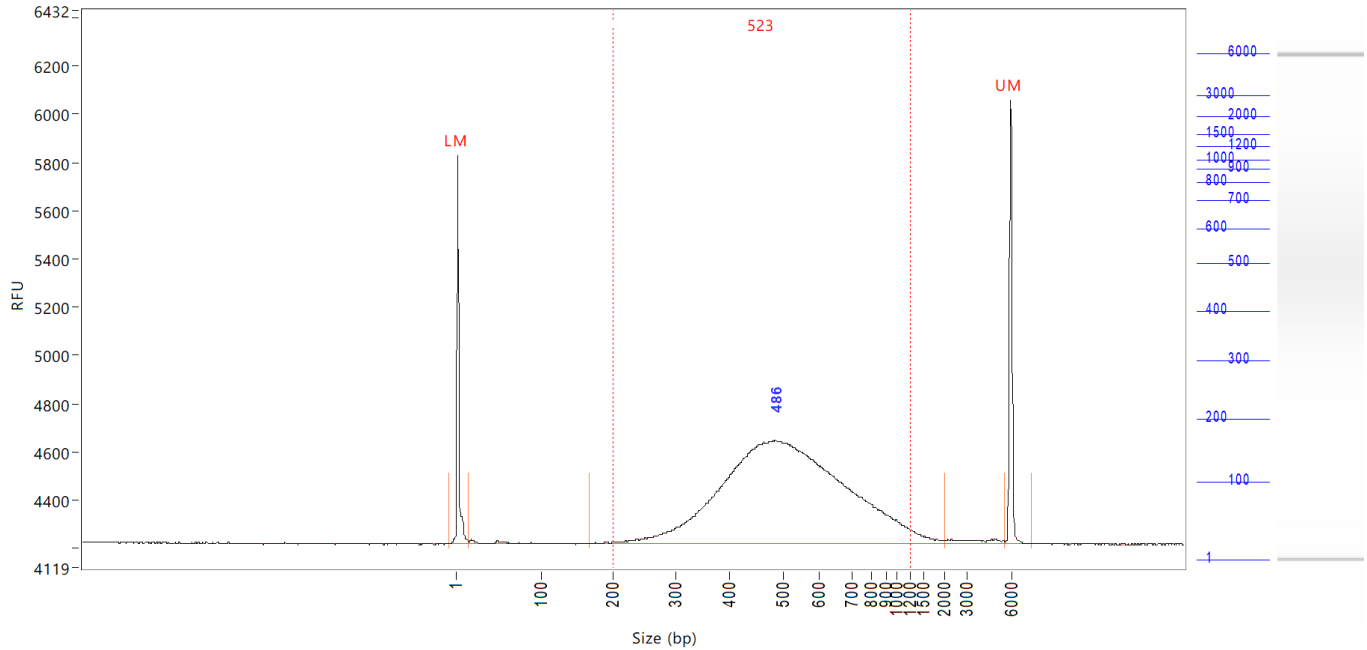

| Peak         | Size (bp) | Conc. (ng/uL) | From (bp) | To (bp) | RFU  |
|--------------|-----------|---------------|-----------|---------|------|
| 1            | 1 (LM)    | 0.0103        | 0         | 14      | 1611 |
| 2            | 486       | 1.1042        | 166       | 2018    | 431  |
| 3            | 6000 (UM) | 0.0067        | 5593      | 7364    | 1846 |
| TIC:         |           | 1.1042        | ng/uL     |         |      |
| TIM:         |           | 3.3965        | nmole/L   |         |      |
| Total Conc.: |           | 1.1316        | ng/uL     |         |      |

Smear Analysis      200 bp to 1200 bp      1.0862 ng/ul      96.0 %Total      3.4192 nmole/L      523 Avg. Size (b.p.)      30.14 %CV

Sample Peak Width (sec): 50    Sample Min Peak Height: 25    Sample Baseline V to V?: Y    Sample Baseline V to V pts: 3  
 Sample Filter: Binomial    # of Pts for Filter: 3    Sample Start Region (min): 0    Sample End Region (min): 50  
 Manual Baseline Start (min): 10    Manual Baseline End (min): 48  
 Marker Peak Width (sec): 5    Marker Min Peak Height: 200    Marker Baseline V to V?: Y    Marker Baseline V to V pts: 3  
 Lower Marker Selection: First Peak > 200 RFU    Upper Marker Selection: Last Peak > 200 RFU  
 Ladder Size (bp): 1, 100, 200, 300, 400, 500, 600, 700, 800, 900, 1000, 1200, 1500, 2000, 3000, 6000  
 Quantification Using: Ladder    Final Concentration (ng/uL): 0.0830    Dilution Factor: 12.0

**Sample:** 103613-001-098

**Well Location:** B7

**Created:** Friday, June 21, 2019 4:25:48 PM

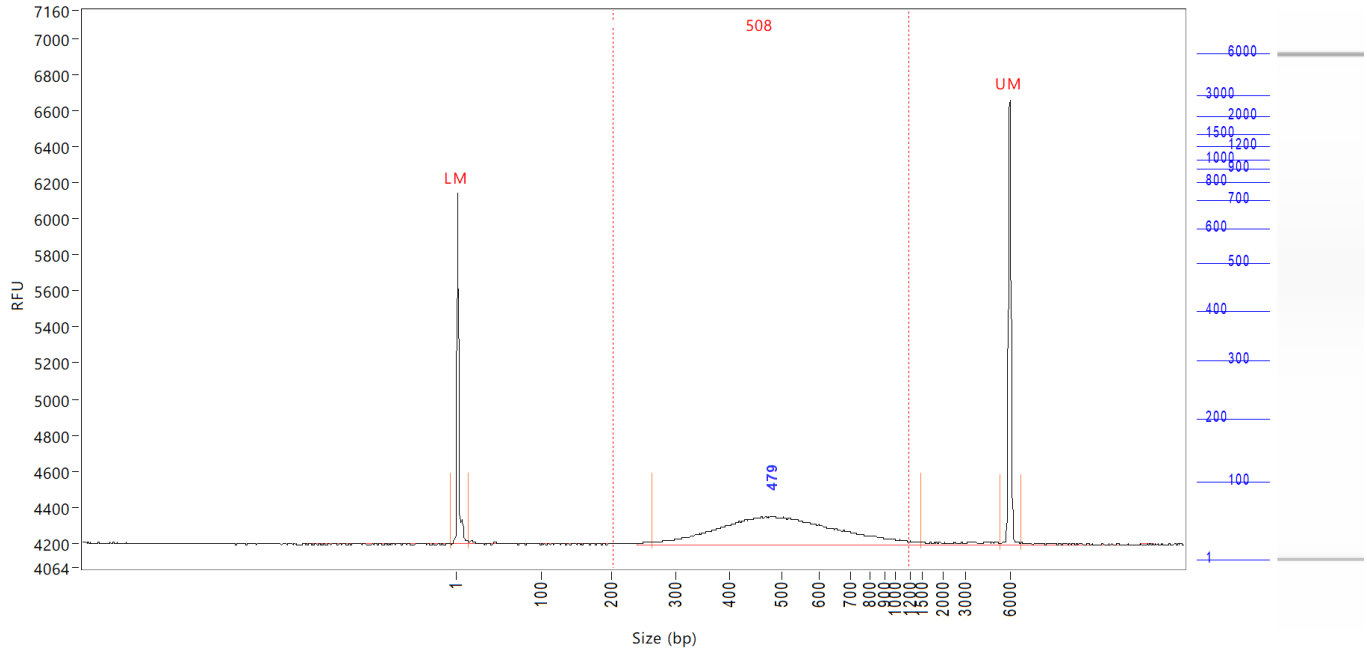

| Peak         | Size (bp) | Conc. (ng/uL) | From (bp) | To (bp) | RFU  |
|--------------|-----------|---------------|-----------|---------|------|
| 1            | 1 (LM)    | 0.0103        | 0         | 15      | 1950 |
| 2            | 479       | 0.3104        | 262       | 1473    | 155  |
| 3            | 6000 (UM) | 0.0073        | 5365      | 6732    | 2473 |
| TIC:         |           | 0.3104        | ng/uL     |         |      |
| TIM:         |           | 0.9879        | nmole/L   |         |      |
| Total Conc.: |           | 0.3304        | ng/uL     |         |      |

Smear Analysis      200 bp to 1200 bp      0.3125 ng/ul      94.6 %Total      1.0120 nmole/L      508 Avg. Size (b.p.)      29.60 %CV

Sample Peak Width (sec): 50      Sample Min Peak Height: 25      Sample Baseline V to V?: Y      Sample Baseline V to V pts: 3  
 Sample Filter: Binomial      # of Pts for Filter: 3      Sample Start Region (min): 0      Sample End Region (min): 50  
 Manual Baseline Start (min): 10      Manual Baseline End (min): 48  
 Marker Peak Width (sec): 5      Marker Min Peak Height: 200      Marker Baseline V to V?: Y      Marker Baseline V to V pts: 3  
 Lower Marker Selection: First Peak > 200 RFU      Upper Marker Selection: Last Peak > 200 RFU  
 Ladder Size (bp): 1, 100, 200, 300, 400, 500, 600, 700, 800, 900, 1000, 1200, 1500, 2000, 3000, 6000  
 Quantification Using: Ladder      Final Concentration (ng/uL): 0.0830      Dilution Factor: 12.0

Sample: 103613-001-099

Well Location: C7

Created: Friday, June 21, 2019 4:25:48 PM

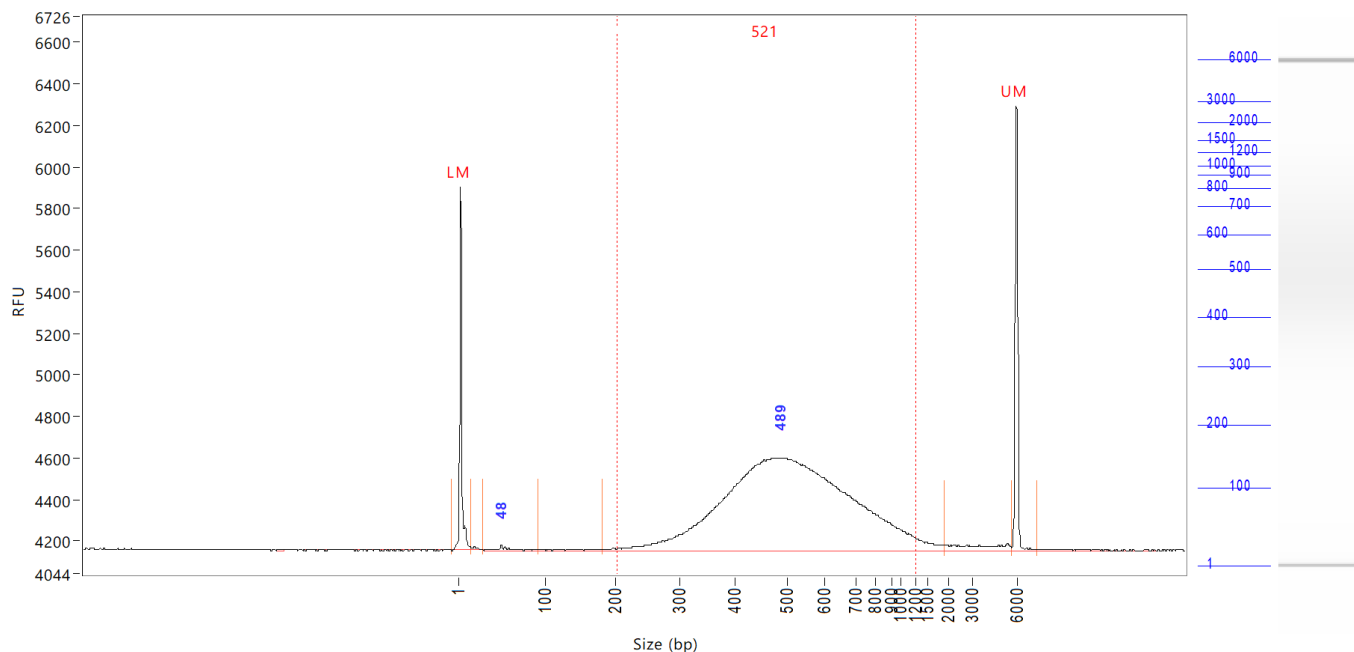

| Peak | Size (bp) | Conc. (ng/uL) | From (bp) | To (bp) | RFU  |
|------|-----------|---------------|-----------|---------|------|
| 1    | 1 (LM)    | 0.0103        | 0         | 14      | 1748 |
| 2    | 48        | 0.0067        | 28        | 91      | 25   |
| 3    | 489       | 1.0969        | 180       | 1889    | 447  |
| 4    | 6000 (UM) | 0.0072        | 5695      | 7389    | 2142 |

TIC: 1.1035 ng/uL  
 TIM: 3.5813 nmole/L  
 Total Conc.: 1.1303 ng/uL

Smear Analysis      200 bp to 1200 bp      1.0808 ng/uL      95.6 %Total      3.4132 nmole/L      521 Avg. Size (b.p.)      30.19 %CV

Sample Peak Width (sec): 50      Sample Min Peak Height: 25      Sample Baseline V to V?: Y      Sample Baseline V to V pts: 3  
 Sample Filter: Binomial      # of Pts for Filter: 3      Sample Start Region (min): 0      Sample End Region (min): 50  
 Manual Baseline Start (min): 10      Manual Baseline End (min): 48  
 Marker Peak Width (sec): 5      Marker Min Peak Height: 200      Marker Baseline V to V?: Y      Marker Baseline V to V pts: 3  
 Lower Marker Selection: First Peak > 200 RFU      Upper Marker Selection: Last Peak > 200 RFU  
 Ladder Size (bp): 1, 100, 200, 300, 400, 500, 600, 700, 800, 900, 1000, 1200, 1500, 2000, 3000, 6000  
 Quantification Using: Ladder      Final Concentration (ng/uL): 0.0830      Dilution Factor: 12.0

**Sample:** 103613-001-100

**Well Location:** D7

**Created:** Friday, June 21, 2019 4:25:48 PM

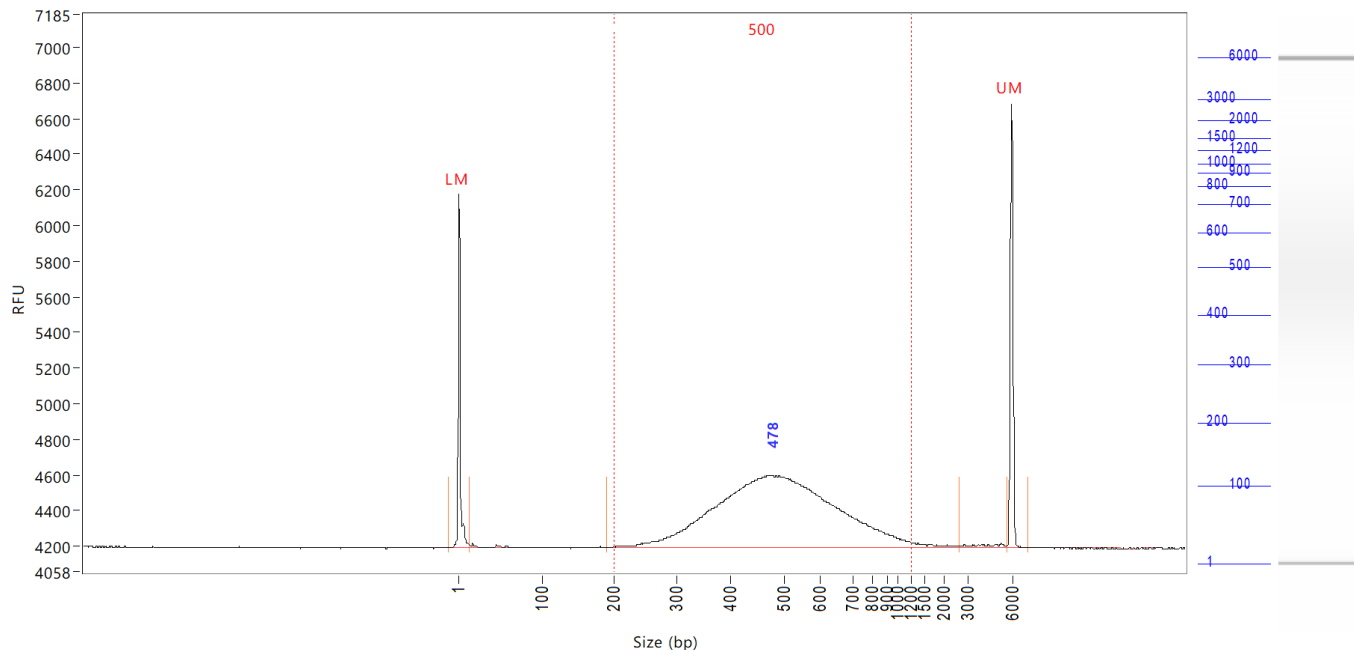

| Peak         | Size (bp) | Conc. (ng/uL) | From (bp) | To (bp) | RFU  |
|--------------|-----------|---------------|-----------|---------|------|
| 1            | 1 (LM)    | 0.0103        | 0         | 15      | 1988 |
| 2            | 478       | 0.8526        | 190       | 2634    | 408  |
| 3            | 6000 (UM) | 0.0074        | 5695      | 7061    | 2496 |
| TIC:         |           | 0.8526        | ng/uL     |         |      |
| TIM:         |           | 2.7294        | nmole/L   |         |      |
| Total Conc.: |           | 0.8696        | ng/uL     |         |      |

Smear Analysis      200 bp to 1200 bp      0.8419 ng/ul      96.8 %Total      2.7685 nmole/L      500 Avg. Size (b.p.)      29.08 %CV

Sample Peak Width (sec): 50      Sample Min Peak Height: 25      Sample Baseline V to V?: Y      Sample Baseline V to V pts: 3  
 Sample Filter: Binomial      # of Pts for Filter: 3      Sample Start Region (min): 0      Sample End Region (min): 50  
 Manual Baseline Start (min): 10      Manual Baseline End (min): 48  
 Marker Peak Width (sec): 5      Marker Min Peak Height: 200      Marker Baseline V to V?: Y      Marker Baseline V to V pts: 3  
 Lower Marker Selection: First Peak > 200 RFU      Upper Marker Selection: Last Peak > 200 RFU  
 Ladder Size (bp): 1, 100, 200, 300, 400, 500, 600, 700, 800, 900, 1000, 1200, 1500, 2000, 3000, 6000  
 Quantification Using: Ladder      Final Concentration (ng/uL): 0.0830      Dilution Factor: 12.0

Sample: 103613-001-101

Well Location: E7

Created: Friday, June 21, 2019 4:25:48 PM

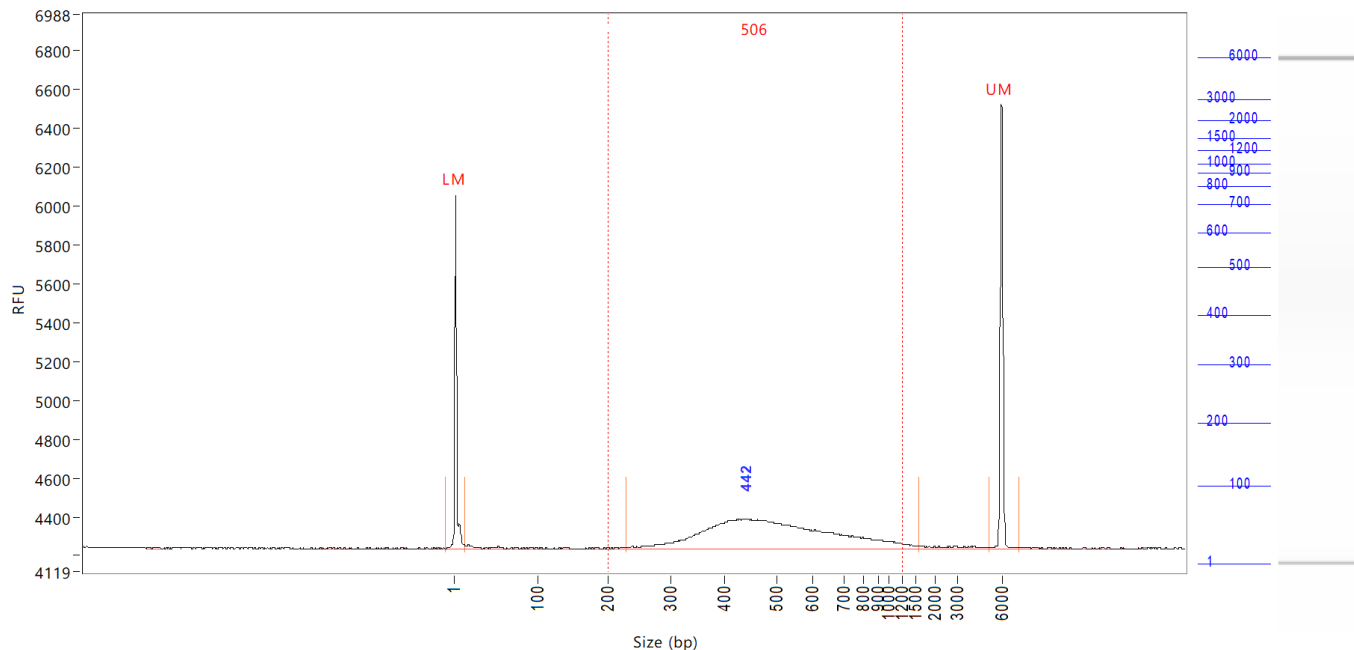

| Peak         | Size (bp) | Conc. (ng/uL) | From (bp) | To (bp) | RFU  |
|--------------|-----------|---------------|-----------|---------|------|
| 1            | 1 (LM)    | 0.0103        | 0         | 15      | 1816 |
| 2            | 442       | 0.3537        | 230       | 1612    | 154  |
| 3            | 6000 (UM) | 0.0074        | 5187      | 7162    | 2291 |
| TIC:         |           | 0.3537        | ng/uL     |         |      |
| TIM:         |           | 1.1259        | nmole/L   |         |      |
| Total Conc.: |           | 0.3679        | ng/uL     |         |      |

Smear Analysis      200 bp to 1200 bp      0.3507 ng/ul      95.3 %Total      1.1397 nmole/L      506 Avg. Size (b.p.)      31.80 %CV

Sample Peak Width (sec): 50      Sample Min Peak Height: 25      Sample Baseline V to V?: Y      Sample Baseline V to V pts: 3  
 Sample Filter: Binomial      # of Pts for Filter: 3      Sample Start Region (min): 0      Sample End Region (min): 50  
 Manual Baseline Start (min): 10      Manual Baseline End (min): 48  
 Marker Peak Width (sec): 5      Marker Min Peak Height: 200      Marker Baseline V to V?: Y      Marker Baseline V to V pts: 3  
 Lower Marker Selection: First Peak > 200 RFU      Upper Marker Selection: Last Peak > 200 RFU  
 Ladder Size (bp): 1, 100, 200, 300, 400, 500, 600, 700, 800, 900, 1000, 1200, 1500, 2000, 3000, 6000  
 Quantification Using: Ladder      Final Concentration (ng/uL): 0.0830      Dilution Factor: 12.0

Sample: 103613-001-102

Well Location: F7

Created: Friday, June 21, 2019 4:25:48 PM

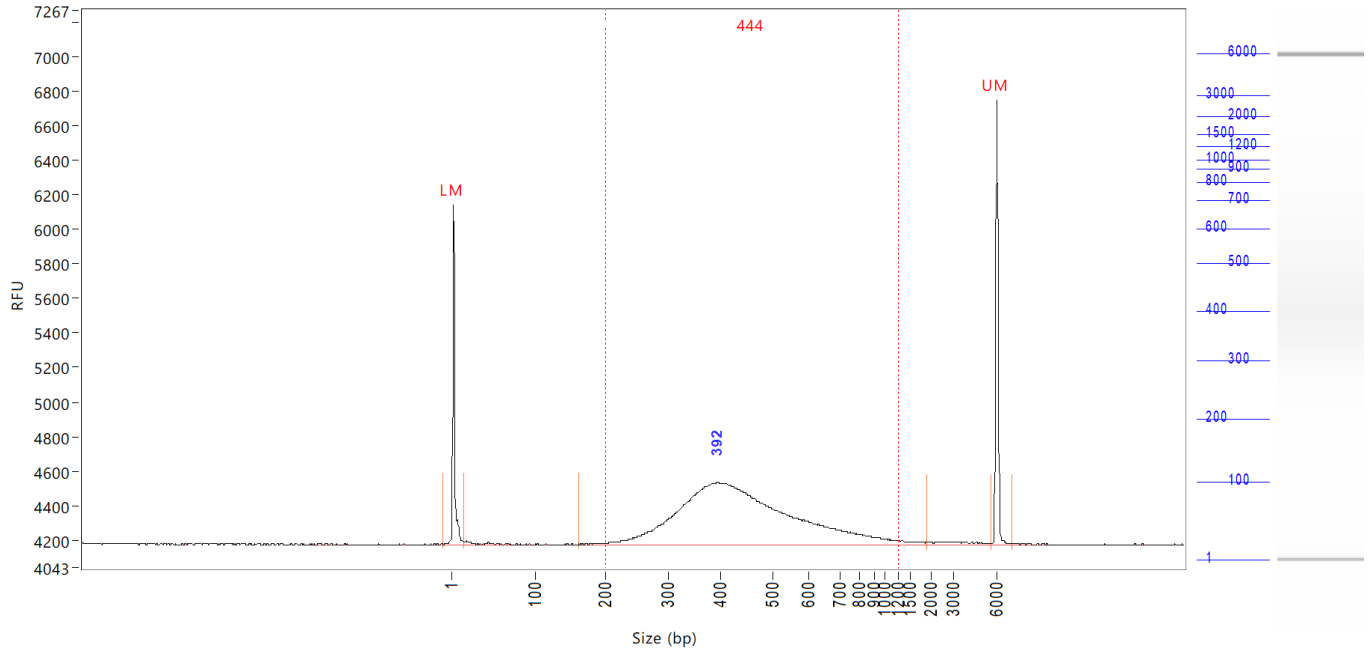

| Peak         | Size (bp) | Conc. (ng/uL) | From (bp) | To (bp) | RFU  |
|--------------|-----------|---------------|-----------|---------|------|
| 1            | 1 (LM)    | 0.0103        | 0         | 14      | 1960 |
| 2            | 392       | 0.7038        | 161       | 1889    | 359  |
| 3            | 6000 (UM) | 0.0077        | 5619      | 7010    | 2576 |
| TIC:         |           | 0.7038        | ng/uL     |         |      |
| TIM:         |           | 2.5678        | nmole/L   |         |      |
| Total Conc.: |           | 0.7172        | ng/uL     |         |      |

Smear Analysis      200 bp to 1200 bp      0.6972 ng/ul      97.2 %Total      2.5838 nmole/L      444 Avg. Size (b.p.)      31.00 %CV

Sample Peak Width (sec): 50      Sample Min Peak Height: 25      Sample Baseline V to V?: Y      Sample Baseline V to V pts: 3  
 Sample Filter: Binomial      # of Pts for Filter: 3      Sample Start Region (min): 0      Sample End Region (min): 50  
 Manual Baseline Start (min): 10      Manual Baseline End (min): 48  
 Marker Peak Width (sec): 5      Marker Min Peak Height: 200      Marker Baseline V to V?: Y      Marker Baseline V to V pts: 3  
 Lower Marker Selection: First Peak > 200 RFU      Upper Marker Selection: Last Peak > 200 RFU  
 Ladder Size (bp): 1, 100, 200, 300, 400, 500, 600, 700, 800, 900, 1000, 1200, 1500, 2000, 3000, 6000  
 Quantification Using: Ladder      Final Concentration (ng/uL): 0.0830      Dilution Factor: 12.0

Sample: 103613-001-103

Well Location: G7

Created: Friday, June 21, 2019 4:25:48 PM

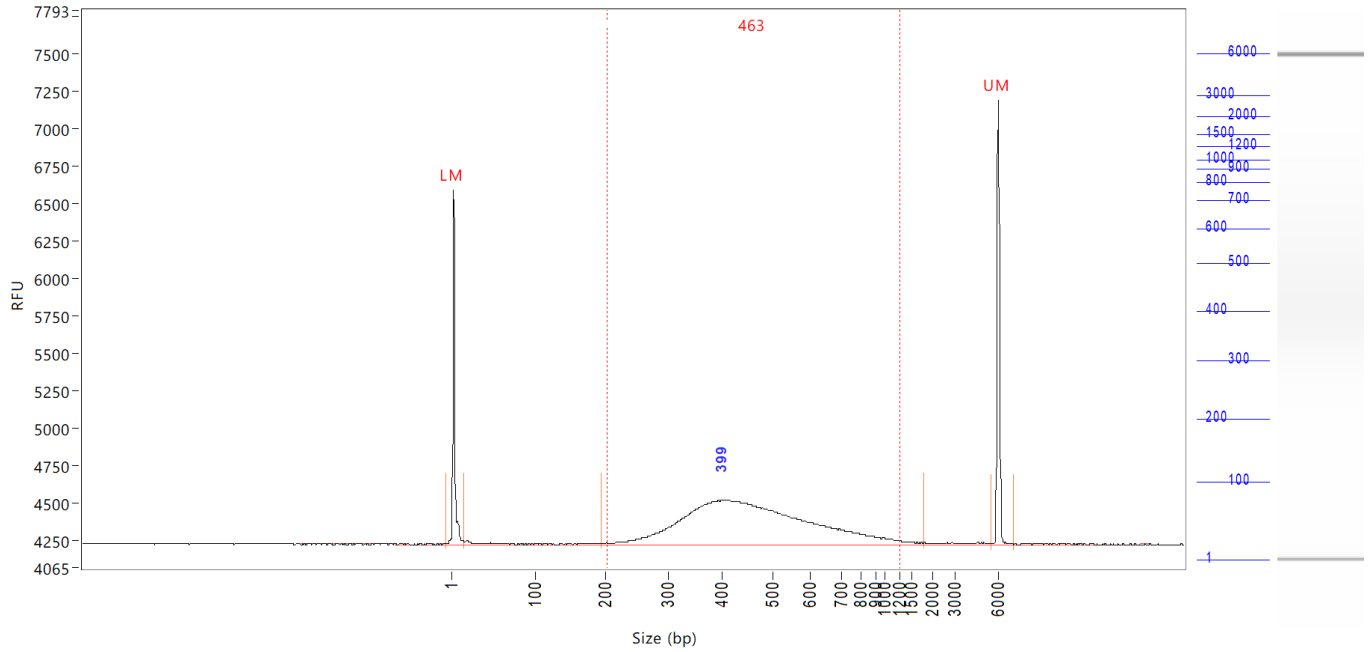

| Peak         | Size (bp) | Conc. (ng/uL) | From (bp) | To (bp) | RFU  |
|--------------|-----------|---------------|-----------|---------|------|
| 1            | 1 (LM)    | 0.0103        | 0         | 15      | 2372 |
| 2            | 399       | 0.5467        | 193       | 1806    | 299  |
| 3            | 6000 (UM) | 0.0074        | 5543      | 7061    | 2978 |
| TIC:         |           | 0.5467        | ng/uL     |         |      |
| TIM:         |           | 1.9140        | nmole/L   |         |      |
| Total Conc.: |           | 0.5615        | ng/uL     |         |      |

Smear Analysis      200 bp to 1200 bp      0.5421 ng/uL      96.6 %Total      1.9257 nmole/L      463 Avg. Size (b.p.)      31.67 %CV

Sample Peak Width (sec): 50    Sample Min Peak Height: 25    Sample Baseline V to V?: Y    Sample Baseline V to V pts: 3  
 Sample Filter: Binomial    # of Pts for Filter: 3    Sample Start Region (min): 0    Sample End Region (min): 50  
 Manual Baseline Start (min): 10    Manual Baseline End (min): 48  
 Marker Peak Width (sec): 5    Marker Min Peak Height: 200    Marker Baseline V to V?: Y    Marker Baseline V to V pts: 3  
 Lower Marker Selection: First Peak > 200 RFU    Upper Marker Selection: Last Peak > 200 RFU  
 Ladder Size (bp): 1, 100, 200, 300, 400, 500, 600, 700, 800, 900, 1000, 1200, 1500, 2000, 3000, 6000  
 Quantification Using: Ladder    Final Concentration (ng/uL): 0.0830    Dilution Factor: 12.0

**Sample:** 103613-001-104

**Well Location:** H7

**Created:** Friday, June 21, 2019 4:25:48 PM

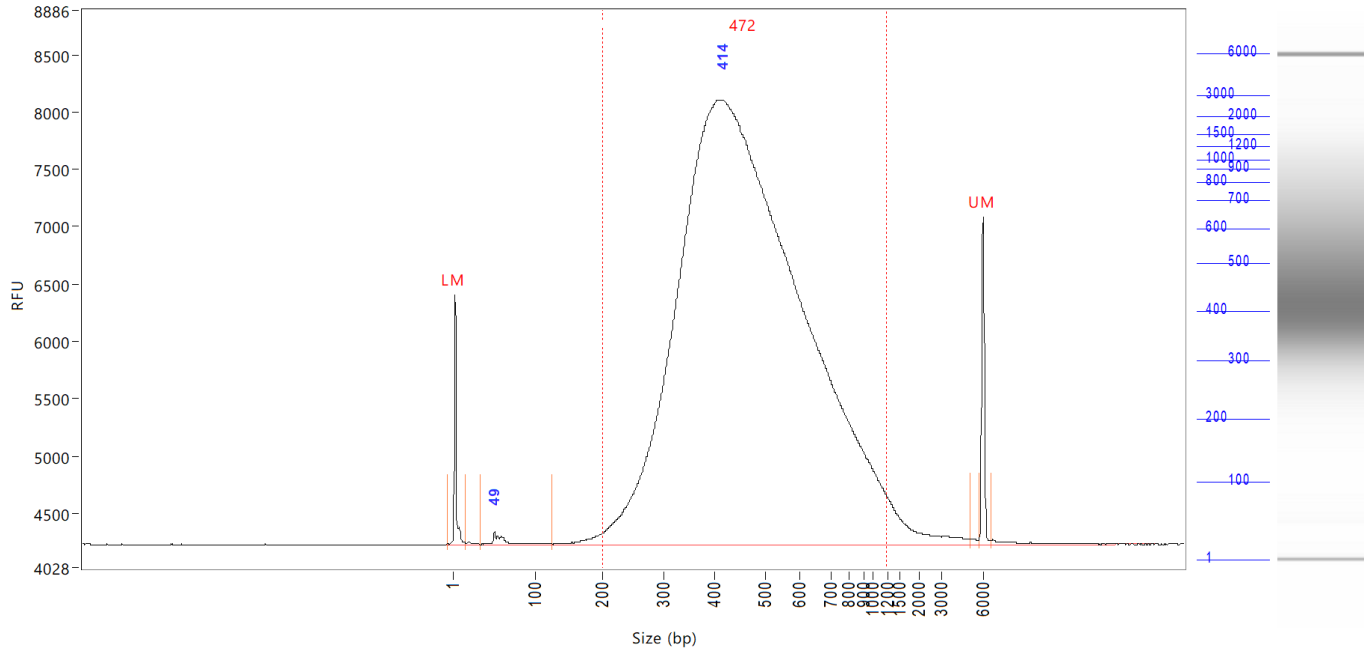

| Peak | Size (bp) | Conc. (ng/uL) | From (bp) | To (bp) | RFU  |
|------|-----------|---------------|-----------|---------|------|
| 1    | 1 (LM)    | 0.0103        | 0         | 15      | 2180 |
| 2    | 49        | 0.0343        | 33        | 125     | 114  |
| 3    | 414       | 7.9371        | 125       | 5085    | 3882 |
| 4    | 6000 (UM) | 0.0079        | 5695      | 6556    | 2853 |

TIC: 7.9714 ng/uL  
 TIM: 27.3027 nmole/L  
 Total Conc.: 7.9796 ng/uL

Smear Analysis      200 bp to 1200 bp      7.7867 ng/uL      97.6 %Total      27.1562 nmole/L      472 Avg. Size (b.p.)      32.40 %CV

Sample Peak Width (sec): 50      Sample Min Peak Height: 25      Sample Baseline V to V?: Y      Sample Baseline V to V pts: 3  
 Sample Filter: Binomial      # of Pts for Filter: 3      Sample Start Region (min): 0      Sample End Region (min): 50  
 Manual Baseline Start (min): 10      Manual Baseline End (min): 48  
 Marker Peak Width (sec): 5      Marker Min Peak Height: 200      Marker Baseline V to V?: Y      Marker Baseline V to V pts: 3  
 Lower Marker Selection: First Peak > 200 RFU      Upper Marker Selection: Last Peak > 200 RFU  
 Ladder Size (bp): 1, 100, 200, 300, 400, 500, 600, 700, 800, 900, 1000, 1200, 1500, 2000, 3000, 6000  
 Quantification Using: Ladder      Final Concentration (ng/uL): 0.0830      Dilution Factor: 12.0



**Sample:** 103613-001-105

**Well Location:** A8

**Created:** Friday, June 21, 2019 4:25:48 PM

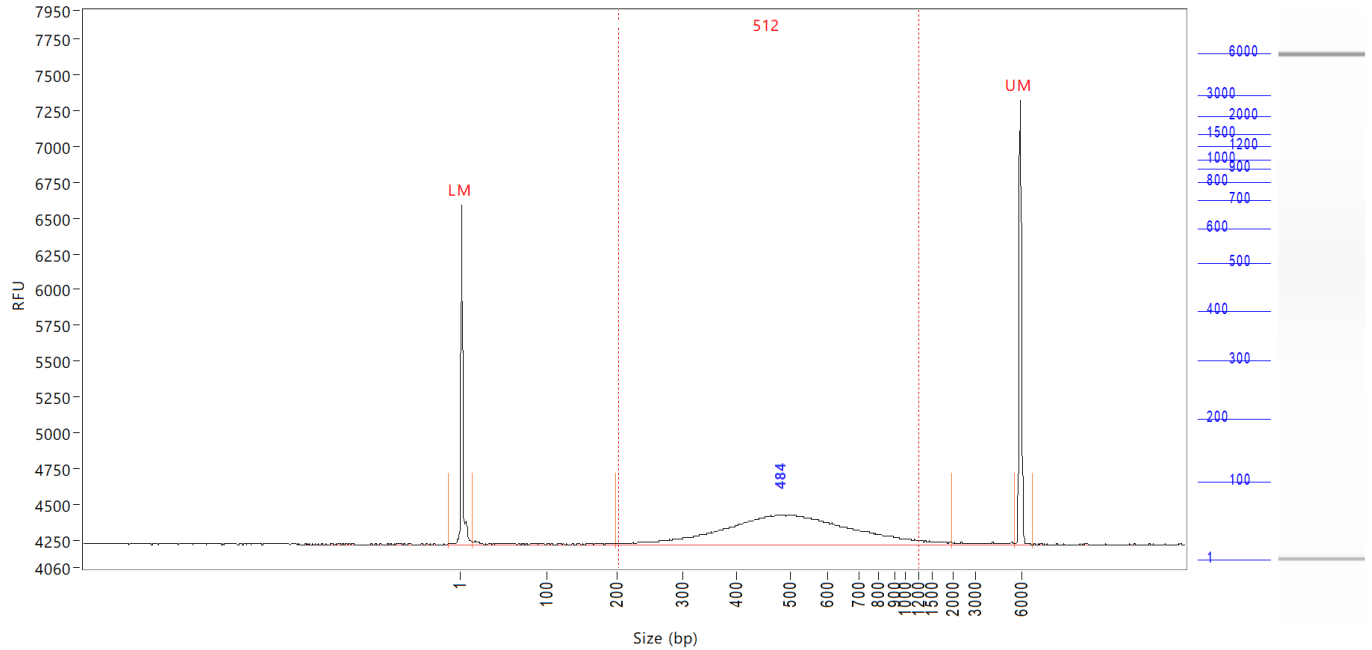

| Peak         | Size (bp) | Conc. (ng/uL) | From (bp) | To (bp) | RFU  |
|--------------|-----------|---------------|-----------|---------|------|
| 1            | 1 (LM)    | 0.0103        | 0         | 15      | 2365 |
| 2            | 484       | 0.3623        | 198       | 1972    | 206  |
| 3            | 6000 (UM) | 0.0073        | 5593      | 6783    | 3107 |
| TIC:         |           | 0.3623        | ng/uL     |         |      |
| TIM:         |           | 1.1291        | nmole/L   |         |      |
| Total Conc.: |           | 0.3763        | ng/uL     |         |      |

Smear Analysis      200 bp to 1200 bp      0.3563 ng/uL      94.7 %Total      1.1458 nmole/L      512 Avg. Size (b.p.)      30.60 %CV

Sample Peak Width (sec): 50      Sample Min Peak Height: 25      Sample Baseline V to V?: Y      Sample Baseline V to V pts: 3  
 Sample Filter: Binomial      # of Pts for Filter: 3      Sample Start Region (min): 0      Sample End Region (min): 50  
 Manual Baseline Start (min): 10      Manual Baseline End (min): 48  
 Marker Peak Width (sec): 5      Marker Min Peak Height: 200      Marker Baseline V to V?: Y      Marker Baseline V to V pts: 3  
 Lower Marker Selection: First Peak > 200 RFU      Upper Marker Selection: Last Peak > 200 RFU  
 Ladder Size (bp): 1, 100, 200, 300, 400, 500, 600, 700, 800, 900, 1000, 1200, 1500, 2000, 3000, 6000  
 Quantification Using: Ladder      Final Concentration (ng/uL): 0.0830      Dilution Factor: 12.0

Sample: 103613-001-106

Well Location: B8

Created: Friday, June 21, 2019 4:25:48 PM

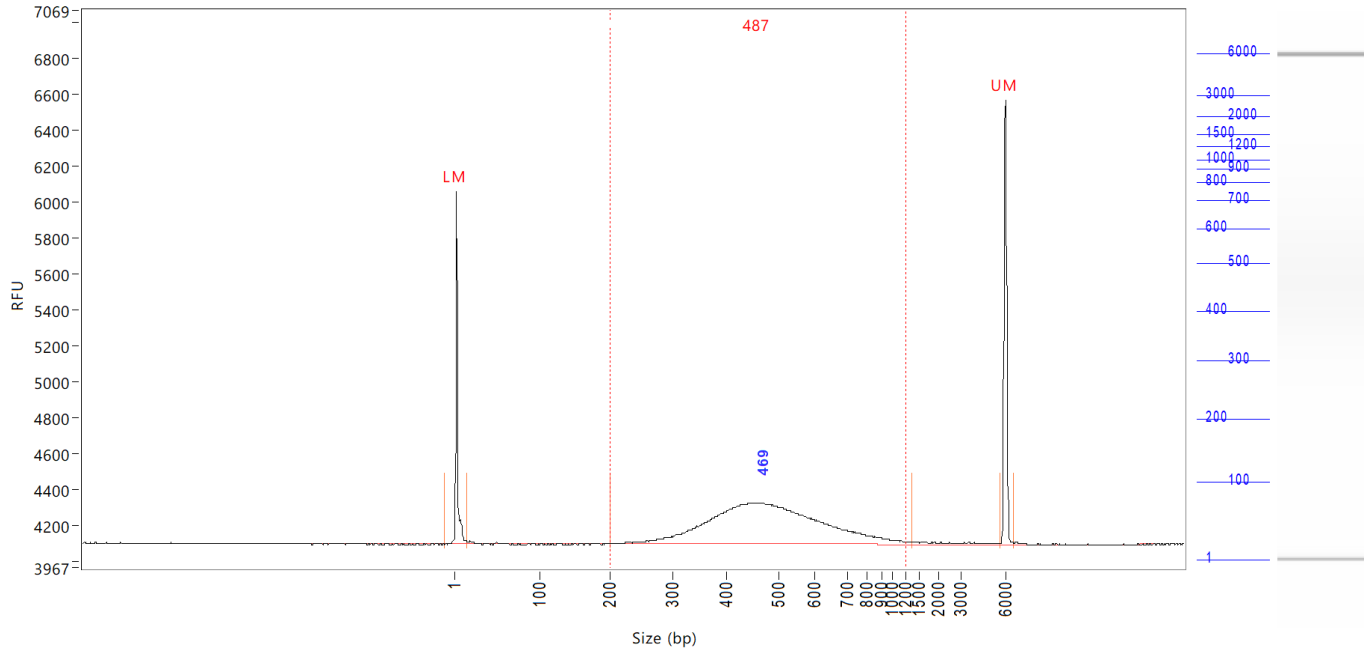

| Peak         | Size (bp) | Conc. (ng/uL) | From (bp) | To (bp) | RFU  |
|--------------|-----------|---------------|-----------|---------|------|
| 1            | 1 (LM)    | 0.0103        | 0         | 15      | 1960 |
| 2            | 469       | 0.4609        | 199       | 1346    | 232  |
| 3            | 6000 (UM) | 0.0075        | 5670      | 6581    | 2477 |
| TIC:         |           | 0.4609        | ng/uL     |         |      |
| TIM:         |           | 1.5509        | nmole/L   |         |      |
| Total Conc.: |           | 0.4726        | ng/uL     |         |      |

Smear Analysis      200 bp to 1200 bp      0.4598 ng/ul      97.3 %Total      1.5535 nmole/L      487 Avg. Size (b.p.)      28.21 %CV

Sample Peak Width (sec): 50    Sample Min Peak Height: 25    Sample Baseline V to V?: Y    Sample Baseline V to V pts: 3  
 Sample Filter: Binomial    # of Pts for Filter: 3    Sample Start Region (min): 0    Sample End Region (min): 50  
 Manual Baseline Start (min): 10    Manual Baseline End (min): 48  
 Marker Peak Width (sec): 5    Marker Min Peak Height: 200    Marker Baseline V to V?: Y    Marker Baseline V to V pts: 3  
 Lower Marker Selection: First Peak > 200 RFU    Upper Marker Selection: Last Peak > 200 RFU  
 Ladder Size (bp): 1, 100, 200, 300, 400, 500, 600, 700, 800, 900, 1000, 1200, 1500, 2000, 3000, 6000  
 Quantification Using: Ladder    Final Concentration (ng/uL): 0.0830    Dilution Factor: 12.0

**Sample:** 103613-001-107

**Well Location:** C8

**Created:** Friday, June 21, 2019 4:25:48 PM

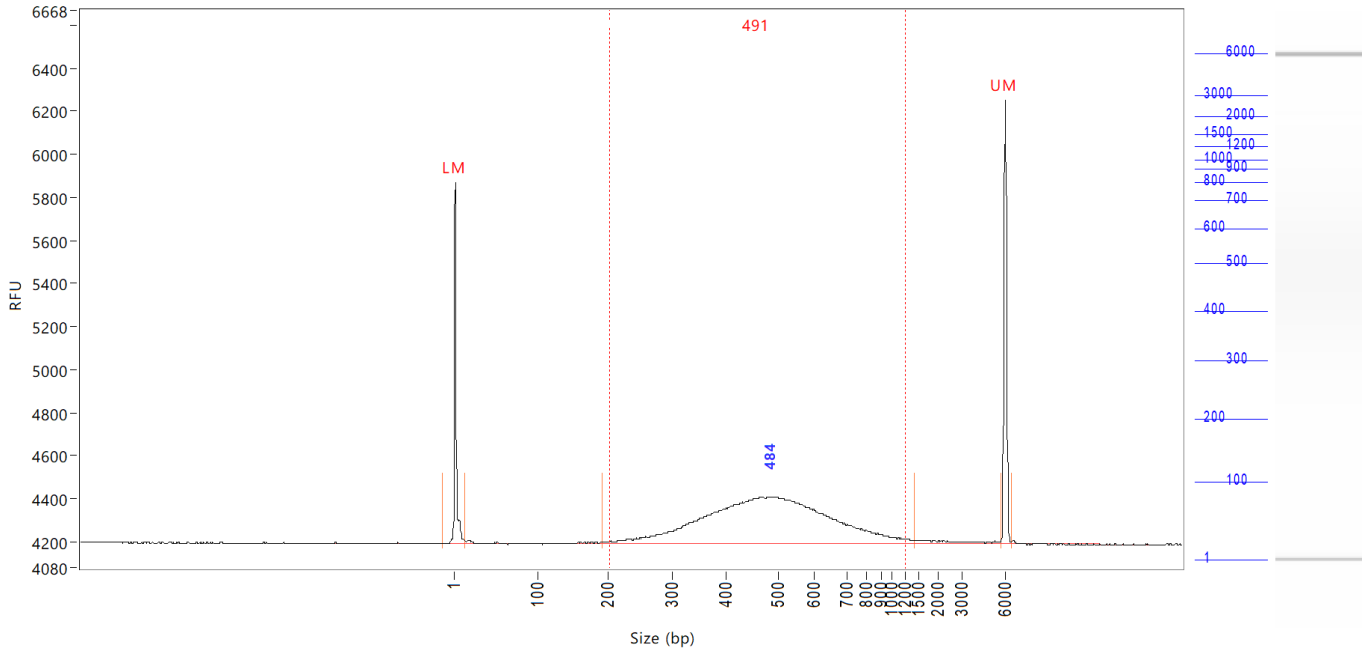

| Peak         | Size (bp) | Conc. (ng/uL) | From (bp) | To (bp) | RFU  |
|--------------|-----------|---------------|-----------|---------|------|
| 1            | 1 (LM)    | 0.0103        | 0         | 14      | 1674 |
| 2            | 484       | 0.5788        | 191       | 1428    | 219  |
| 3            | 6000 (UM) | 0.0073        | 5695      | 6404    | 2066 |
| TIC:         |           | 0.5788        | ng/uL     |         |      |
| TIM:         |           | 1.9281        | nmole/L   |         |      |
| Total Conc.: |           | 0.5984        | ng/uL     |         |      |

Smear Analysis      200 bp to 1200 bp      0.5750 ng/uL      96.1 %Total      1.9288 nmole/L      491 Avg. Size (b.p.)      30.60 %CV

Sample Peak Width (sec): 50      Sample Min Peak Height: 25      Sample Baseline V to V?: Y      Sample Baseline V to V pts: 3  
 Sample Filter: Binomial      # of Pts for Filter: 3      Sample Start Region (min): 0      Sample End Region (min): 50  
 Manual Baseline Start (min): 10      Manual Baseline End (min): 48  
 Marker Peak Width (sec): 5      Marker Min Peak Height: 200      Marker Baseline V to V?: Y      Marker Baseline V to V pts: 3  
 Lower Marker Selection: First Peak > 200 RFU      Upper Marker Selection: Last Peak > 200 RFU  
 Ladder Size (bp): 1, 100, 200, 300, 400, 500, 600, 700, 800, 900, 1000, 1200, 1500, 2000, 3000, 6000  
 Quantification Using: Ladder      Final Concentration (ng/uL): 0.0830      Dilution Factor: 12.0

Sample: 103613-001-108

Well Location: D8

Created: Friday, June 21, 2019 4:25:48 PM

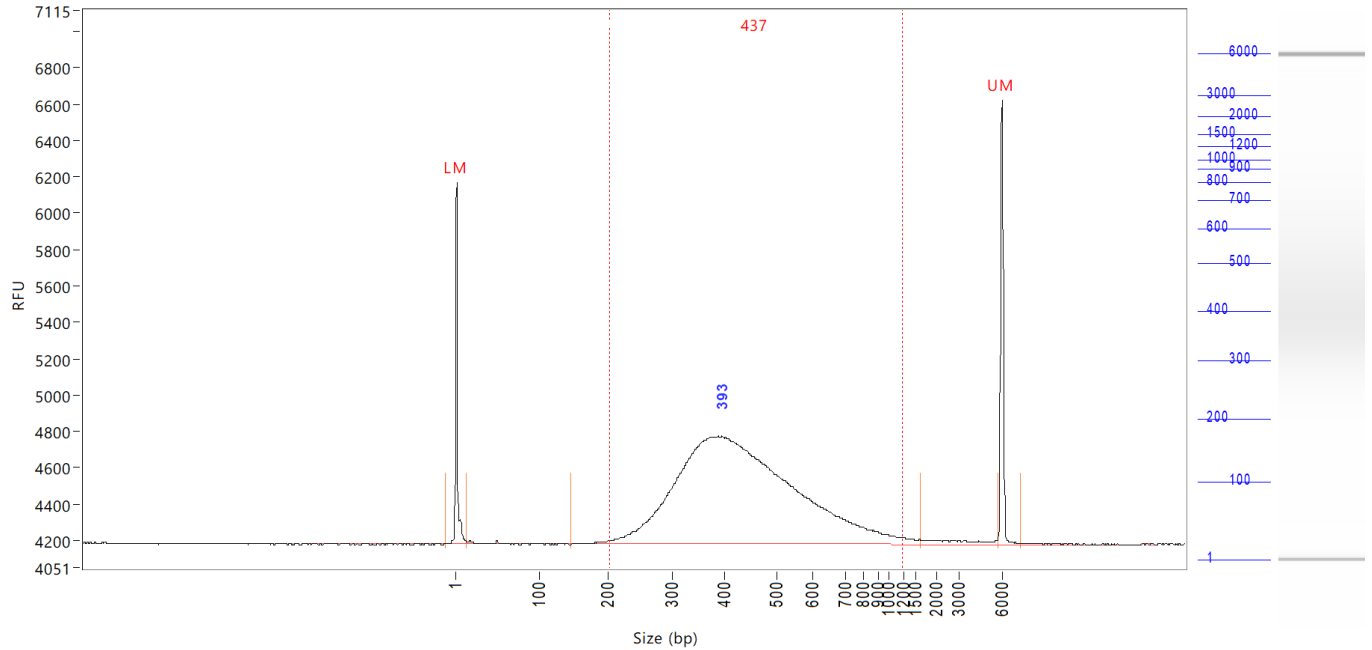

| Peak         | Size (bp) | Conc. (ng/uL) | From (bp) | To (bp) | RFU  |
|--------------|-----------|---------------|-----------|---------|------|
| 1            | 1 (LM)    | 0.0103        | 0         | 14      | 1987 |
| 2            | 393       | 1.2724        | 145       | 1630    | 593  |
| 3            | 6000 (UM) | 0.0074        | 5720      | 7288    | 2447 |
| TIC:         |           | 1.2724        | ng/uL     |         |      |
| TIM:         |           | 4.7475        | nmole/L   |         |      |
| Total Conc.: |           | 1.2929        | ng/uL     |         |      |

Smear Analysis      200 bp to 1200 bp      1.2621 ng/ul      97.6 %Total      4.7532 nmole/L      437 Avg. Size (b.p.)      31.09 %CV

Sample Peak Width (sec): 50    Sample Min Peak Height: 25    Sample Baseline V to V?: Y    Sample Baseline V to V pts: 3  
 Sample Filter: Binomial    # of Pts for Filter: 3    Sample Start Region (min): 0    Sample End Region (min): 50  
 Manual Baseline Start (min): 10    Manual Baseline End (min): 48  
 Marker Peak Width (sec): 5    Marker Min Peak Height: 200    Marker Baseline V to V?: Y    Marker Baseline V to V pts: 3  
 Lower Marker Selection: First Peak > 200 RFU    Upper Marker Selection: Last Peak > 200 RFU  
 Ladder Size (bp): 1, 100, 200, 300, 400, 500, 600, 700, 800, 900, 1000, 1200, 1500, 2000, 3000, 6000  
 Quantification Using: Ladder    Final Concentration (ng/uL): 0.0830    Dilution Factor: 12.0

**Sample:** 103613-001-109

**Well Location:** E8

**Created:** Friday, June 21, 2019 4:25:48 PM

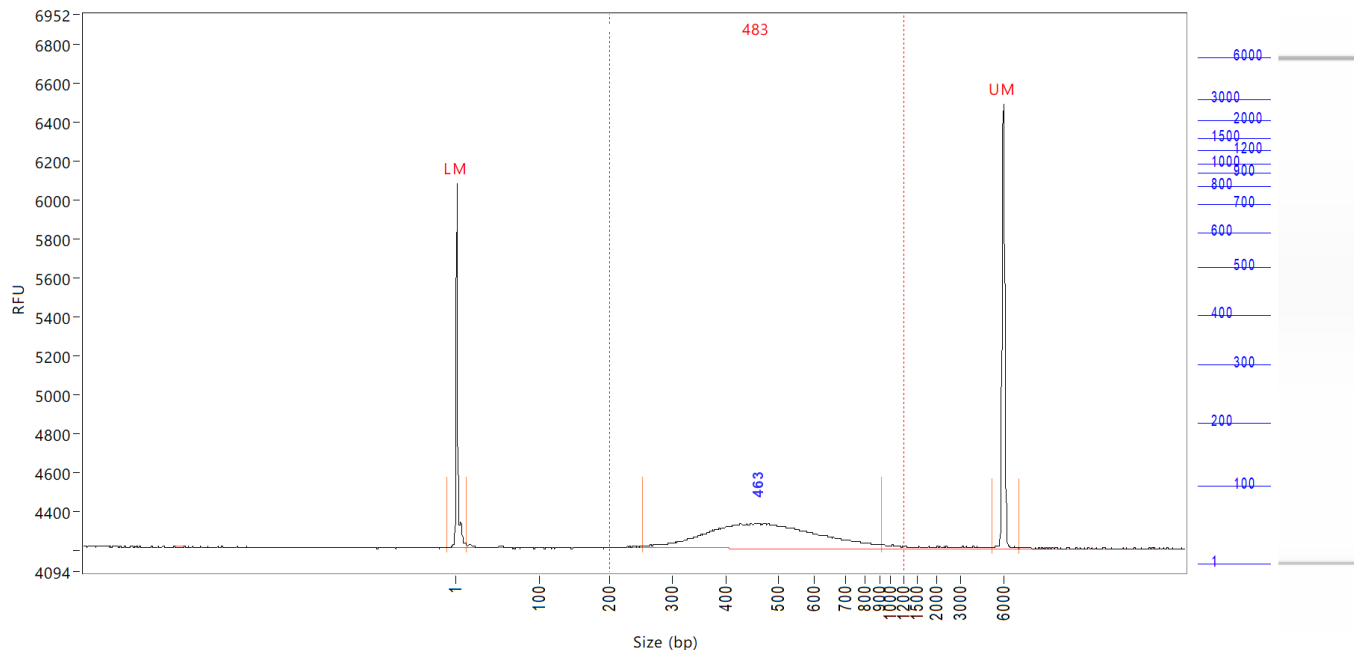

| Peak         | Size (bp) | Conc. (ng/uL) | From (bp) | To (bp) | RFU  |
|--------------|-----------|---------------|-----------|---------|------|
| 1            | 1 (LM)    | 0.0103        | 0         | 15      | 1868 |
| 2            | 463       | 0.2710        | 251       | 920     | 127  |
| 3            | 6000 (UM) | 0.0074        | 5187      | 7061    | 2283 |
| TIC:         |           | 0.2710        | ng/uL     |         |      |
| TIM:         |           | 0.9310        | nmole/L   |         |      |
| Total Conc.: |           | 0.2960        | ng/uL     |         |      |

Smear Analysis      200 bp to 1200 bp      0.2791 ng/ul      94.3 %Total      0.9508 nmole/L      483 Avg. Size (b.p.)      29.09 %CV

Sample Peak Width (sec): 50      Sample Min Peak Height: 25      Sample Baseline V to V?: Y      Sample Baseline V to V pts: 3  
 Sample Filter: Binomial      # of Pts for Filter: 3      Sample Start Region (min): 0      Sample End Region (min): 50  
 Manual Baseline Start (min): 10      Manual Baseline End (min): 48  
 Marker Peak Width (sec): 5      Marker Min Peak Height: 200      Marker Baseline V to V?: Y      Marker Baseline V to V pts: 3  
 Lower Marker Selection: First Peak > 200 RFU      Upper Marker Selection: Last Peak > 200 RFU  
 Ladder Size (bp): 1, 100, 200, 300, 400, 500, 600, 700, 800, 900, 1000, 1200, 1500, 2000, 3000, 6000  
 Quantification Using: Ladder      Final Concentration (ng/uL): 0.0830      Dilution Factor: 12.0

Sample: 103613-001-110

Well Location: F8

Created: Friday, June 21, 2019 4:25:48 PM

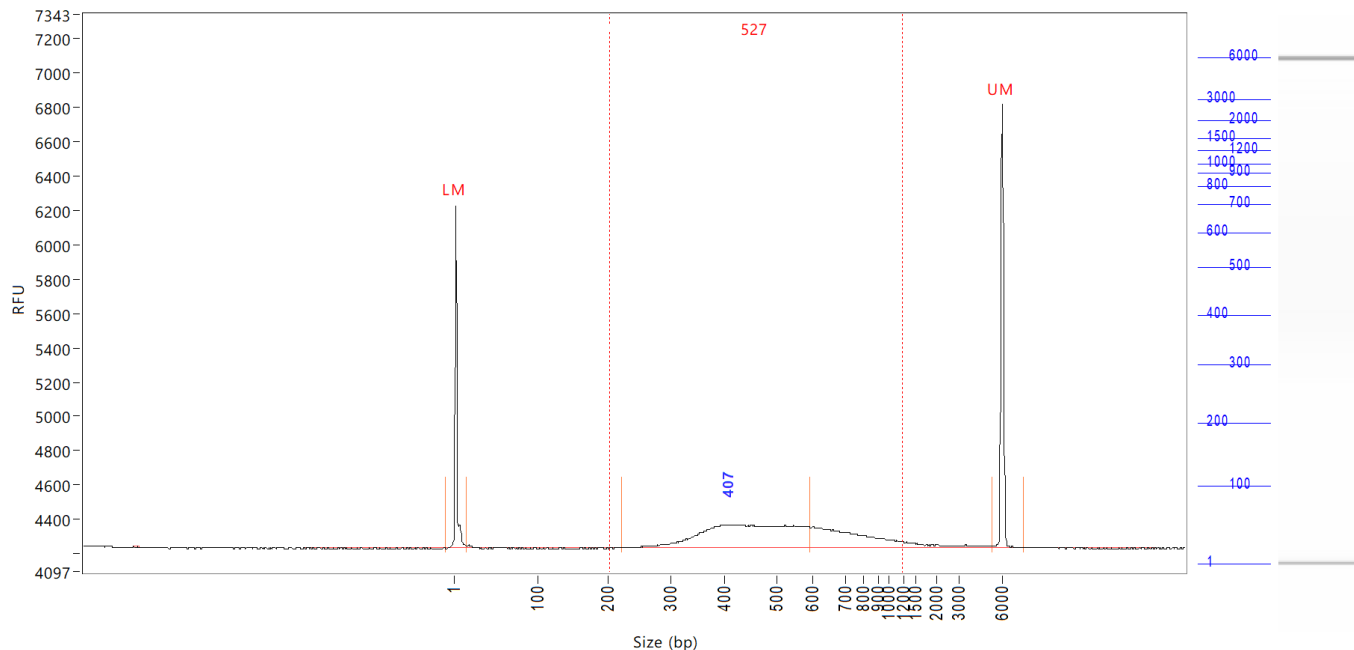

| Peak         | Size (bp) | Conc. (ng/uL) | From (bp) | To (bp) | RFU  |
|--------------|-----------|---------------|-----------|---------|------|
| 1            | 1 (LM)    | 0.0103        | 0         | 15      | 1992 |
| 2            | 407       | 0.2479        | 222       | 593     | 137  |
| 3            | 6000 (UM) | 0.0079        | 5339      | 7465    | 2591 |
| TIC:         |           | 0.2479        | ng/uL     |         |      |
| TIM:         |           | 0.9248        | nmole/L   |         |      |
| Total Conc.: |           | 0.3688        | ng/uL     |         |      |

Smear Analysis      200 bp to 1200 bp      0.3466 ng/ul      94.0 %Total      1.0828 nmole/L      527 Avg. Size (b.p.)      32.45 %CV

Sample Peak Width (sec): 50      Sample Min Peak Height: 25      Sample Baseline V to V?: Y      Sample Baseline V to V pts: 3  
 Sample Filter: Binomial      # of Pts for Filter: 3      Sample Start Region (min): 0      Sample End Region (min): 50  
 Manual Baseline Start (min): 10      Manual Baseline End (min): 48  
 Marker Peak Width (sec): 5      Marker Min Peak Height: 200      Marker Baseline V to V?: Y      Marker Baseline V to V pts: 3  
 Lower Marker Selection: First Peak > 200 RFU      Upper Marker Selection: Last Peak > 200 RFU  
 Ladder Size (bp): 1, 100, 200, 300, 400, 500, 600, 700, 800, 900, 1000, 1200, 1500, 2000, 3000, 6000  
 Quantification Using: Ladder      Final Concentration (ng/uL): 0.0830      Dilution Factor: 12.0

Sample: 103613-001-111

Well Location: G8

Created: Friday, June 21, 2019 4:25:48 PM

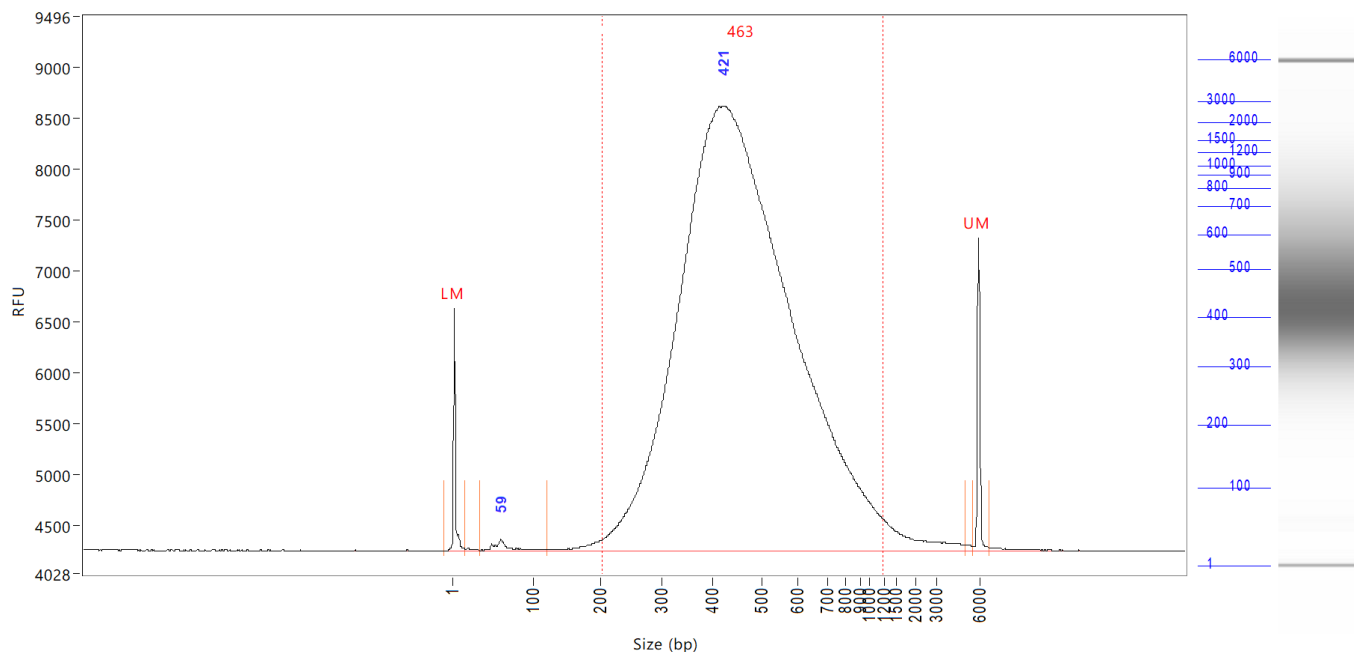

| Peak | Size (bp) | Conc. (ng/uL) | From (bp) | To (bp) | RFU  |
|------|-----------|---------------|-----------|---------|------|
| 1    | 1 (LM)    | 0.0103        | 0         | 16      | 2377 |
| 2    | 59        | 0.0339        | 33        | 120     | 107  |
| 3    | 421       | 7.5651        | 120       | 5085    | 4370 |
| 4    | 6000 (UM) | 0.0079        | 5543      | 6758    | 3064 |

TIC: 7.5990 ng/uL  
 TIM: 26.5339 nmole/L  
 Total Conc.: 7.6053 ng/uL

Smear Analysis      200 bp to 1200 bp      7.4332 ng/uL      97.7 %Total      26.4241 nmole/L      463 Avg. Size (b.p.)      30.25 %CV

Sample Peak Width (sec): 50      Sample Min Peak Height: 25      Sample Baseline V to V?: Y      Sample Baseline V to V pts: 3  
 Sample Filter: Binomial      # of Pts for Filter: 3      Sample Start Region (min): 0      Sample End Region (min): 50  
 Manual Baseline Start (min): 10      Manual Baseline End (min): 48  
 Marker Peak Width (sec): 5      Marker Min Peak Height: 200      Marker Baseline V to V?: Y      Marker Baseline V to V pts: 3  
 Lower Marker Selection: First Peak > 200 RFU      Upper Marker Selection: Last Peak > 200 RFU  
 Ladder Size (bp): 1, 100, 200, 300, 400, 500, 600, 700, 800, 900, 1000, 1200, 1500, 2000, 3000, 6000  
 Quantification Using: Ladder      Final Concentration (ng/uL): 0.0830      Dilution Factor: 12.0

Sample: 103613-001-112

Well Location: H8

Created: Friday, June 21, 2019 4:25:48 PM

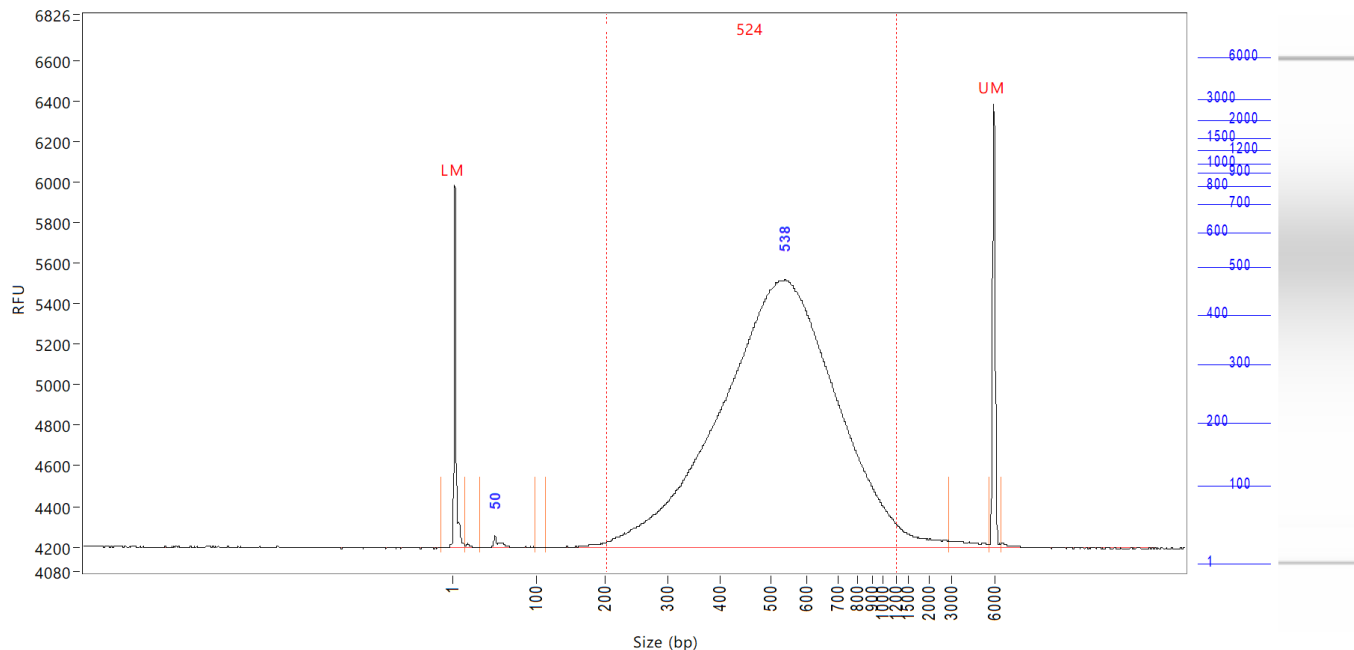

| Peak         | Size (bp) | Conc. (ng/uL) | From (bp) | To (bp) | RFU  |
|--------------|-----------|---------------|-----------|---------|------|
| 1            | 1 (LM)    | 0.0103        | 0         | 15      | 1787 |
| 2            | 50        | 0.0129        | 32        | 97      | 57   |
| 3            | 538       | 2.8673        | 114       | 2900    | 1323 |
| 4            | 6000 (UM) | 0.0069        | 5670      | 6480    | 2191 |
| TIC:         |           | 2.8802        | ng/uL     |         |      |
| TIM:         |           | 9.1238        | nmole/L   |         |      |
| Total Conc.: |           | 2.8969        | ng/uL     |         |      |

Smear Analysis      200 bp to 1200 bp      2.8186 ng/uL      97.3 %Total      8.8479 nmole/L      524 Avg. Size (b.p.)      29.04 %CV

Sample Peak Width (sec): 50      Sample Min Peak Height: 25      Sample Baseline V to V?: Y      Sample Baseline V to V pts: 3  
 Sample Filter: Binomial      # of Pts for Filter: 3      Sample Start Region (min): 0      Sample End Region (min): 50  
 Manual Baseline Start (min): 10      Manual Baseline End (min): 48  
 Marker Peak Width (sec): 5      Marker Min Peak Height: 200      Marker Baseline V to V?: Y      Marker Baseline V to V pts: 3  
 Lower Marker Selection: First Peak > 200 RFU      Upper Marker Selection: Last Peak > 200 RFU  
 Ladder Size (bp): 1, 100, 200, 300, 400, 500, 600, 700, 800, 900, 1000, 1200, 1500, 2000, 3000, 6000  
 Quantification Using: Ladder      Final Concentration (ng/uL): 0.0830      Dilution Factor: 12.0



Sample: 103613-001-113

Well Location: A9

Created: Friday, June 21, 2019 4:25:48 PM

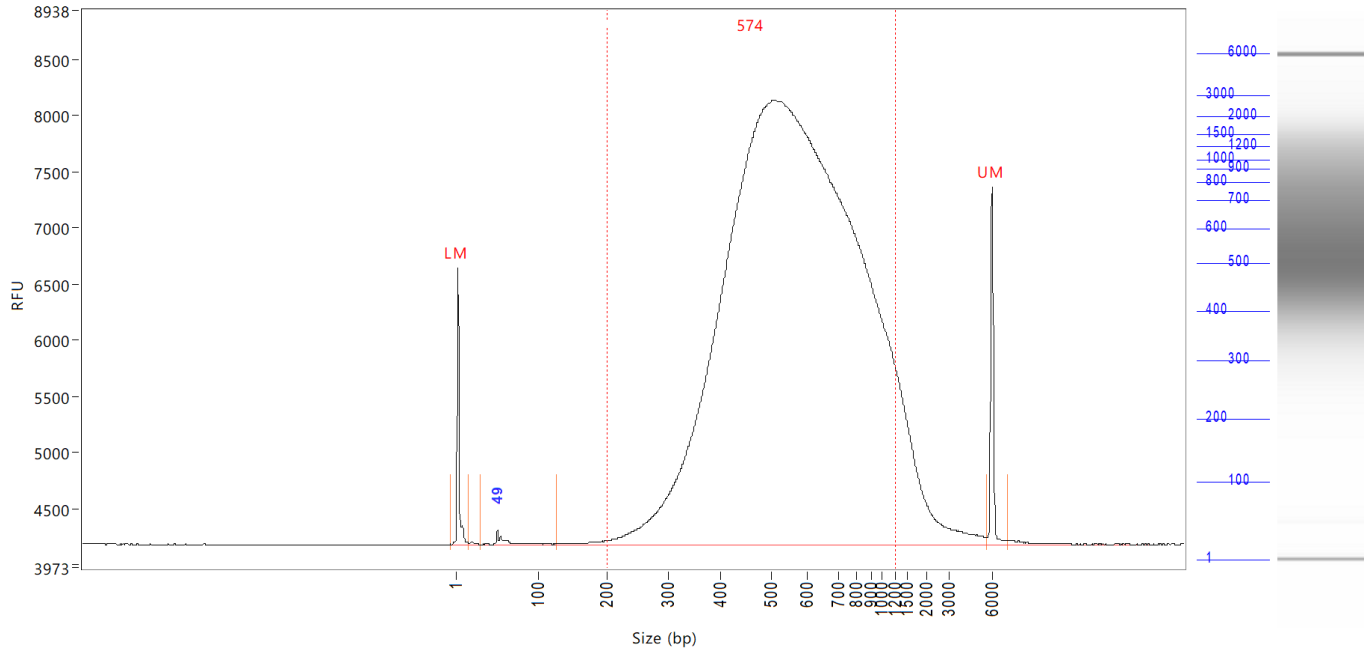

| Peak         | Size (bp) | Conc. (ng/uL) | From (bp) | To (bp) | RFU  |
|--------------|-----------|---------------|-----------|---------|------|
| 1            | 1 (LM)    | 0.0103        | 0         | 14      | 2472 |
| 2            | 49        | 0.0234        | 30        | 125     | 134  |
| 3            | 6000 (UM) | 0.0080        | 5695      | 7162    | 3188 |
| TIC:         |           | 0.0234        | ng/uL     |         |      |
| TIM:         |           | 0.5998        | nmole/L   |         |      |
| Total Conc.: |           | 7.6600        | ng/uL     |         |      |

Smear Analysis      200 bp to 1200 bp      7.2382 ng/uL      94.5 %Total      20.7624 nmole/L      574 Avg. Size (b.p.)      31.91 %CV

Sample Peak Width (sec): 50      Sample Min Peak Height: 25      Sample Baseline V to V?: Y      Sample Baseline V to V pts: 3  
 Sample Filter: Binomial      # of Pts for Filter: 3      Sample Start Region (min): 0      Sample End Region (min): 50  
 Manual Baseline Start (min): 10      Manual Baseline End (min): 48  
 Marker Peak Width (sec): 5      Marker Min Peak Height: 200      Marker Baseline V to V?: Y      Marker Baseline V to V pts: 3  
 Lower Marker Selection: First Peak > 200 RFU      Upper Marker Selection: Last Peak > 200 RFU  
 Ladder Size (bp): 1, 100, 200, 300, 400, 500, 600, 700, 800, 900, 1000, 1200, 1500, 2000, 3000, 6000  
 Quantification Using: Ladder      Final Concentration (ng/uL): 0.0830      Dilution Factor: 12.0

Sample: 103613-001-114

Well Location: B9

Created: Friday, June 21, 2019 4:25:48 PM

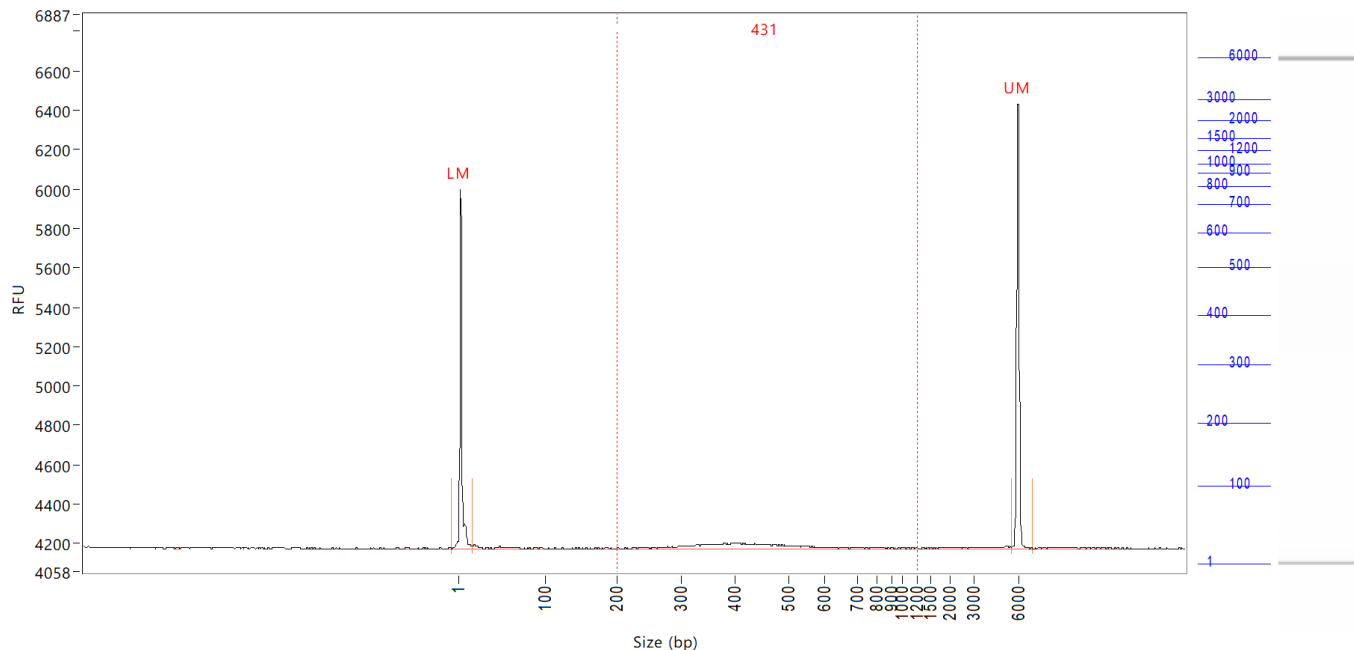

| Peak         | Size (bp) | Conc. (ng/uL) | From (bp) | To (bp) | RFU  |
|--------------|-----------|---------------|-----------|---------|------|
| 1            | 1 (LM)    | 0.0103        | 0         | 15      | 1821 |
| 2            | 6000 (UM) | 0.0073        | 5543      | 6985    | 2261 |
| TIC:         |           | 0.0000        | ng/uL     |         |      |
| TIM:         |           | 0.0000        | nmole/L   |         |      |
| Total Conc.: |           | 0.0698        | ng/uL     |         |      |

Smear Analysis      200 bp to 1200 bp      0.0545 ng/ul      78.2 %Total      0.2080 nmole/L      431 Avg. Size (b.p.)      31.39 %CV

Sample Peak Width (sec): 50    Sample Min Peak Height: 25    Sample Baseline V to V?: Y    Sample Baseline V to V pts: 3  
 Sample Filter: Binomial    # of Pts for Filter: 3    Sample Start Region (min): 0    Sample End Region (min): 50  
 Manual Baseline Start (min): 10    Manual Baseline End (min): 48  
 Marker Peak Width (sec): 5    Marker Min Peak Height: 200    Marker Baseline V to V?: Y    Marker Baseline V to V pts: 3  
 Lower Marker Selection: First Peak > 200 RFU    Upper Marker Selection: Last Peak > 200 RFU  
 Ladder Size (bp): 1, 100, 200, 300, 400, 500, 600, 700, 800, 900, 1000, 1200, 1500, 2000, 3000, 6000  
 Quantification Using: Ladder    Final Concentration (ng/uL): 0.0830    Dilution Factor: 12.0

Sample: 103613-001-115

Well Location: C9

Created: Friday, June 21, 2019 4:25:48 PM

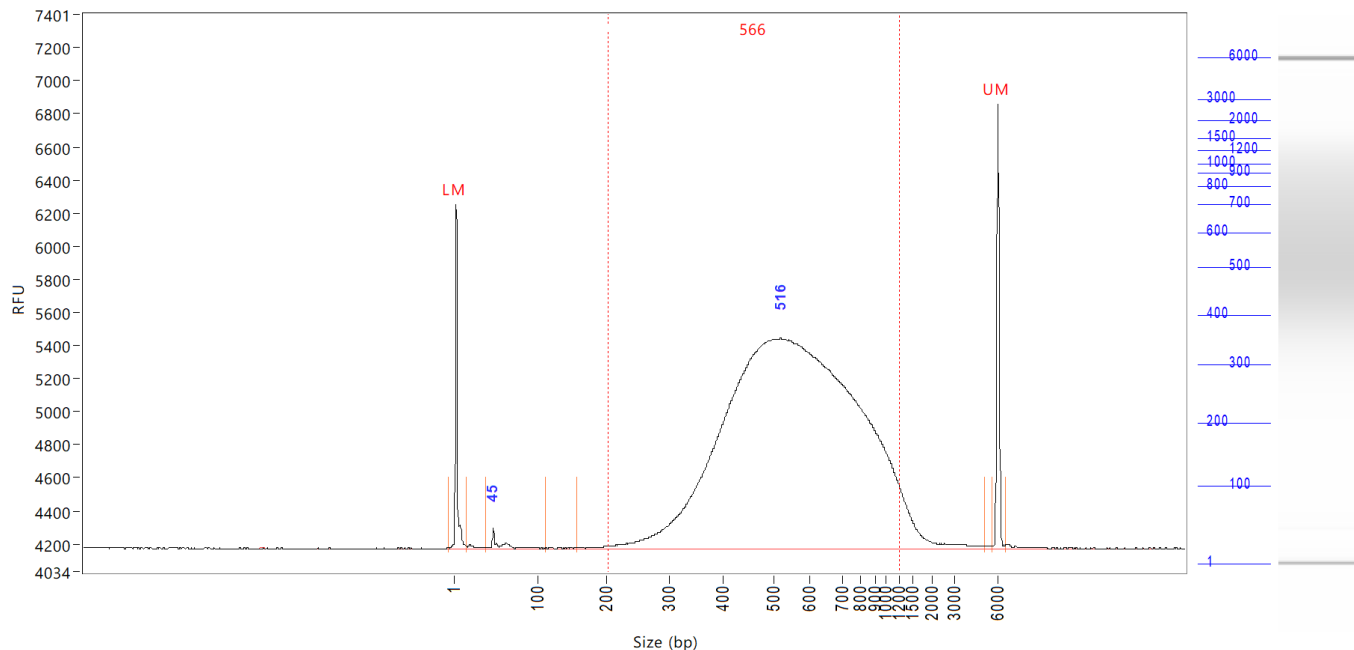

| Peak | Size (bp) | Conc. (ng/uL) | From (bp) | To (bp) | RFU  |
|------|-----------|---------------|-----------|---------|------|
| 1    | 1 (LM)    | 0.0103        | 0         | 15      | 2083 |
| 2    | 45        | 0.0166        | 38        | 110     | 124  |
| 3    | 516       | 2.8638        | 156       | 5085    | 1272 |
| 4    | 6000 (UM) | 0.0076        | 5644      | 6505    | 2689 |

TIC: 2.8803 ng/uL  
 TIM: 8.3968 nmole/L  
 Total Conc.: 2.8860 ng/uL

Smear Analysis      200 bp to 1200 bp      2.7880 ng/uL      96.6 %Total      8.1035 nmole/L      566 Avg. Size (b.p.)      31.35 %CV

Sample Peak Width (sec): 50      Sample Min Peak Height: 25      Sample Baseline V to V?: Y      Sample Baseline V to V pts: 3  
 Sample Filter: Binomial      # of Pts for Filter: 3      Sample Start Region (min): 0      Sample End Region (min): 50  
 Manual Baseline Start (min): 10      Manual Baseline End (min): 48  
 Marker Peak Width (sec): 5      Marker Min Peak Height: 200      Marker Baseline V to V?: Y      Marker Baseline V to V pts: 3  
 Lower Marker Selection: First Peak > 200 RFU      Upper Marker Selection: Last Peak > 200 RFU  
 Ladder Size (bp): 1, 100, 200, 300, 400, 500, 600, 700, 800, 900, 1000, 1200, 1500, 2000, 3000, 6000  
 Quantification Using: Ladder      Final Concentration (ng/uL): 0.0830      Dilution Factor: 12.0

Sample: 103613-001-116

Well Location: D9

Created: Friday, June 21, 2019 4:25:48 PM

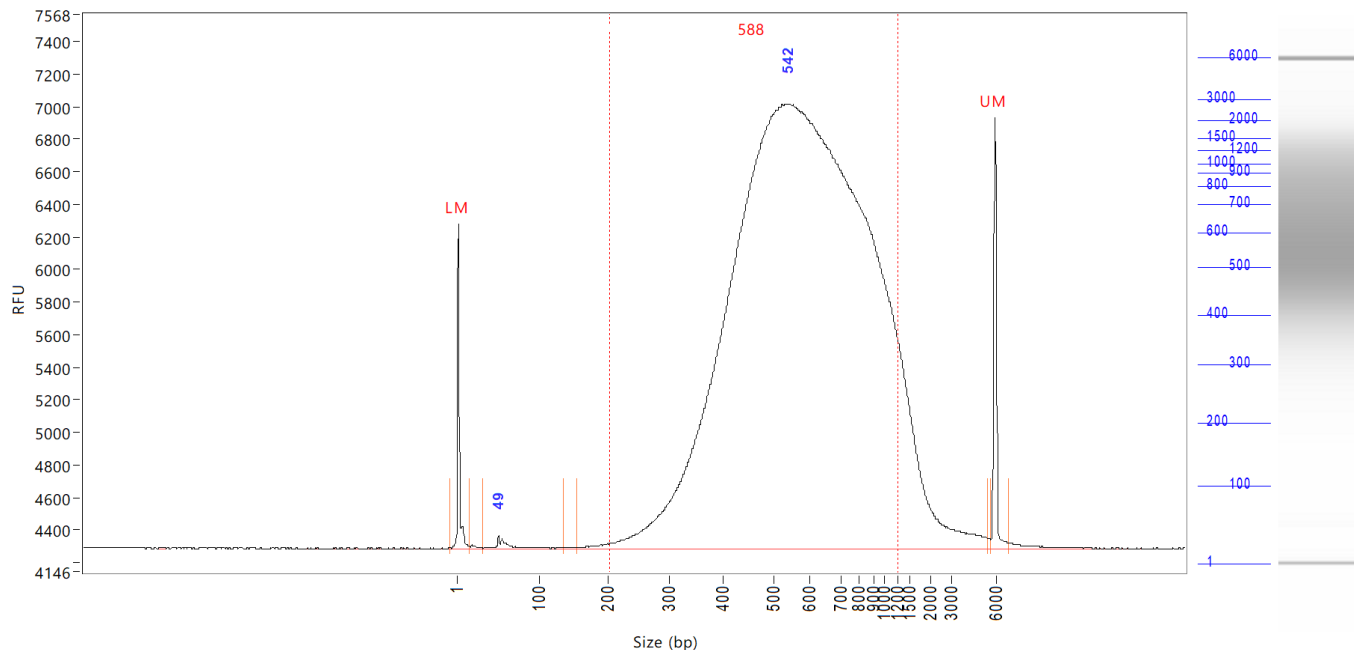

| Peak | Size (bp) | Conc. (ng/uL) | From (bp) | To (bp) | RFU  |
|------|-----------|---------------|-----------|---------|------|
| 1    | 1 (LM)    | 0.0103        | 0         | 15      | 1997 |
| 2    | 49        | 0.0227        | 31        | 134     | 76   |
| 3    | 542       | 6.5410        | 153       | 5517    | 2734 |
| 4    | 6000 (UM) | 0.0083        | 5720      | 6985    | 2647 |

TIC: 6.5637 ng/uL  
 TIM: 16.9484 nmole/L  
 Total Conc.: 6.5706 ng/uL

Smear Analysis      200 bp to 1200 bp      6.1711 ng/uL      93.9 %Total      17.2703 nmole/L      588 Avg. Size (b.p.)      32.07 %CV

Sample Peak Width (sec): 50      Sample Min Peak Height: 25      Sample Baseline V to V?: Y      Sample Baseline V to V pts: 3  
 Sample Filter: Binomial      # of Pts for Filter: 3      Sample Start Region (min): 0      Sample End Region (min): 50  
 Manual Baseline Start (min): 10      Manual Baseline End (min): 48  
 Marker Peak Width (sec): 5      Marker Min Peak Height: 200      Marker Baseline V to V?: Y      Marker Baseline V to V pts: 3  
 Lower Marker Selection: First Peak > 200 RFU      Upper Marker Selection: Last Peak > 200 RFU  
 Ladder Size (bp): 1, 100, 200, 300, 400, 500, 600, 700, 800, 900, 1000, 1200, 1500, 2000, 3000, 6000  
 Quantification Using: Ladder      Final Concentration (ng/uL): 0.0830      Dilution Factor: 12.0

Sample: 103613-001-117

Well Location: E9

Created: Friday, June 21, 2019 4:25:48 PM

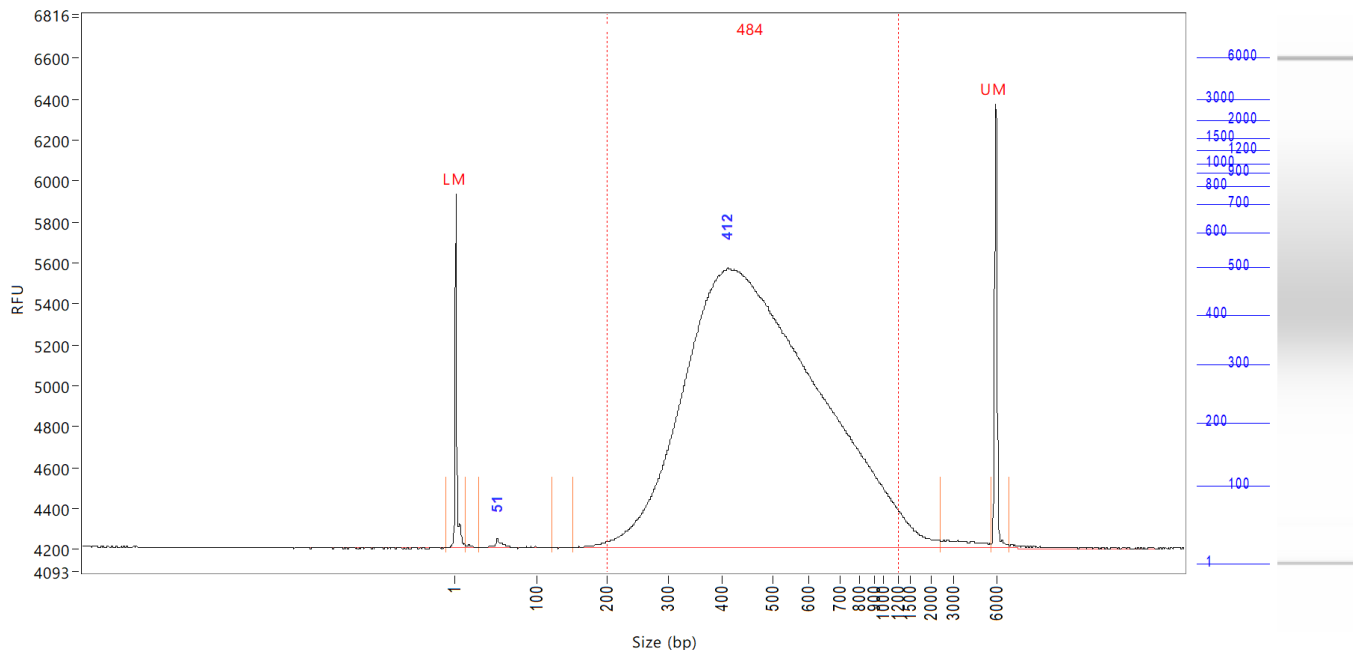

| Peak         | Size (bp) | Conc. (ng/uL) | From (bp) | To (bp) | RFU  |
|--------------|-----------|---------------|-----------|---------|------|
| 1            | 1 (LM)    | 0.0103        | 0         | 14      | 1728 |
| 2            | 51        | 0.0148        | 30        | 120     | 48   |
| 3            | 412       | 3.7697        | 151       | 2467    | 1369 |
| 4            | 6000 (UM) | 0.0077        | 5644      | 6960    | 2174 |
| TIC:         |           | 3.7845        | ng/uL     |         |      |
| TIM:         |           | 12.8606       | nmole/L   |         |      |
| Total Conc.: |           | 3.8090        | ng/uL     |         |      |

Smear Analysis      200 bp to 1200 bp      3.7087 ng/uL      97.4 %Total      12.6095 nmole/L      484 Avg. Size (b.p.)      33.07 %CV

Sample Peak Width (sec): 50      Sample Min Peak Height: 25      Sample Baseline V to V?: Y      Sample Baseline V to V pts: 3  
 Sample Filter: Binomial      # of Pts for Filter: 3      Sample Start Region (min): 0      Sample End Region (min): 50  
 Manual Baseline Start (min): 10      Manual Baseline End (min): 48  
 Marker Peak Width (sec): 5      Marker Min Peak Height: 200      Marker Baseline V to V?: Y      Marker Baseline V to V pts: 3  
 Lower Marker Selection: First Peak > 200 RFU      Upper Marker Selection: Last Peak > 200 RFU  
 Ladder Size (bp): 1, 100, 200, 300, 400, 500, 600, 700, 800, 900, 1000, 1200, 1500, 2000, 3000, 6000  
 Quantification Using: Ladder      Final Concentration (ng/uL): 0.0830      Dilution Factor: 12.0

**Sample:** 103613-001-118

**Well Location:** F9

**Created:** Friday, June 21, 2019 4:25:48 PM

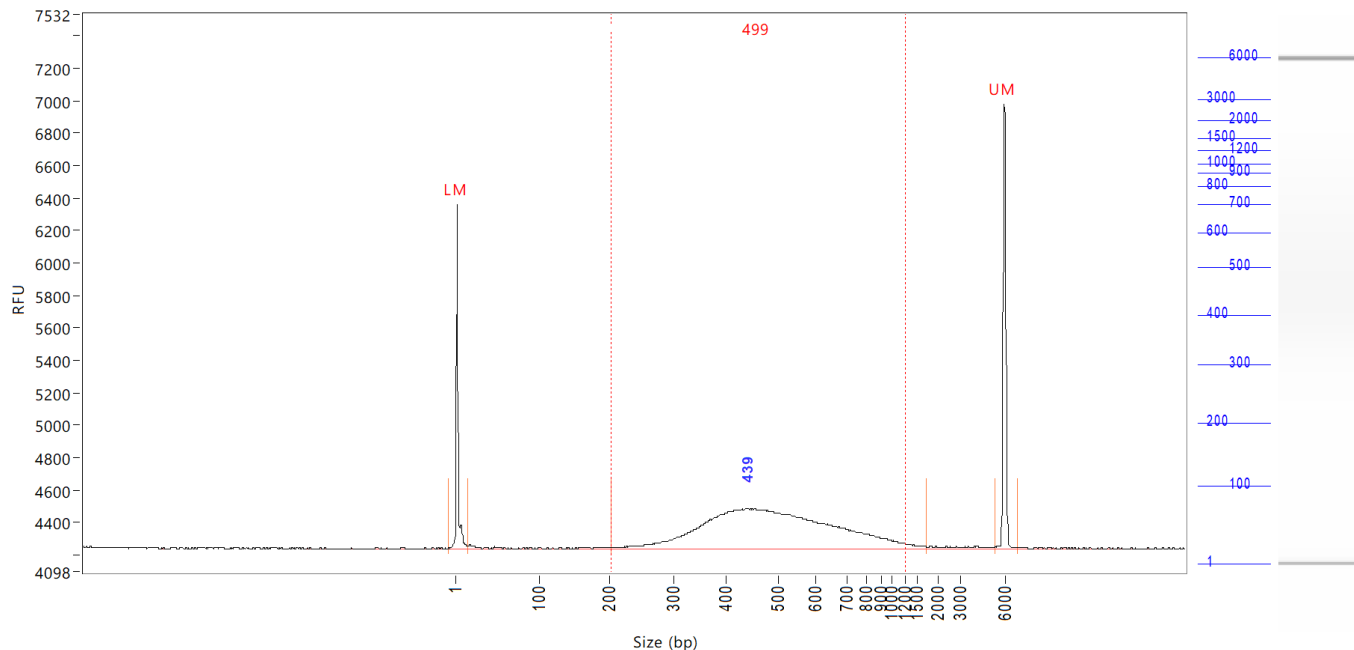

| Peak         | Size (bp) | Conc. (ng/uL) | From (bp) | To (bp) | RFU  |
|--------------|-----------|---------------|-----------|---------|------|
| 1            | 1 (LM)    | 0.0103        | 0         | 15      | 2123 |
| 2            | 439       | 0.5148        | 202       | 1714    | 246  |
| 3            | 6000 (UM) | 0.0075        | 5390      | 6884    | 2743 |
| TIC:         |           | 0.5148        | ng/uL     |         |      |
| TIM:         |           | 1.6709        | nmole/L   |         |      |
| Total Conc.: |           | 0.5317        | ng/uL     |         |      |

Smear Analysis      200 bp to 1200 bp      0.5104 ng/ul      96.0 %Total      1.6830 nmole/L      499 Avg. Size (b.p.)      31.43 %CV

Sample Peak Width (sec): 50      Sample Min Peak Height: 25      Sample Baseline V to V?: Y      Sample Baseline V to V pts: 3  
 Sample Filter: Binomial      # of Pts for Filter: 3      Sample Start Region (min): 0      Sample End Region (min): 50  
 Manual Baseline Start (min): 10      Manual Baseline End (min): 48  
 Marker Peak Width (sec): 5      Marker Min Peak Height: 200      Marker Baseline V to V?: Y      Marker Baseline V to V pts: 3  
 Lower Marker Selection: First Peak > 200 RFU      Upper Marker Selection: Last Peak > 200 RFU  
 Ladder Size (bp): 1, 100, 200, 300, 400, 500, 600, 700, 800, 900, 1000, 1200, 1500, 2000, 3000, 6000  
 Quantification Using: Ladder      Final Concentration (ng/uL): 0.0830      Dilution Factor: 12.0

Sample: 103613-001-119

Well Location: G9

Created: Friday, June 21, 2019 4:25:48 PM

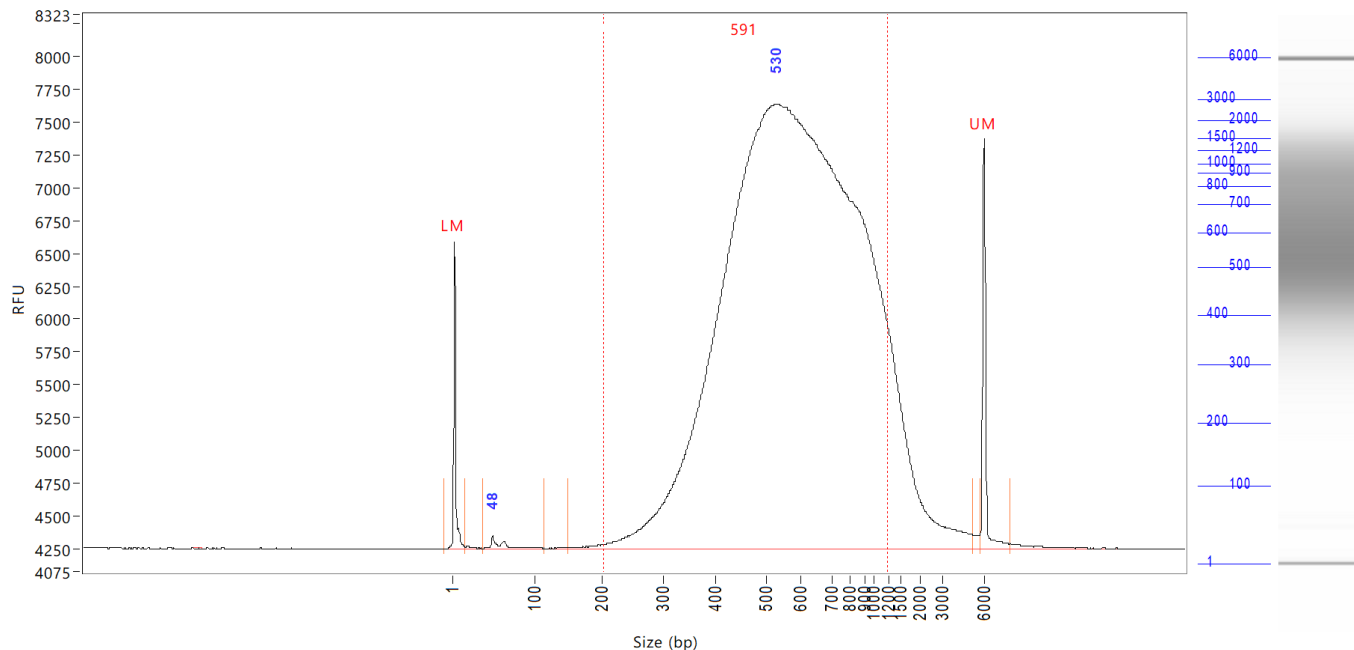

| Peak         | Size (bp) | Conc. (ng/uL) | From (bp) | To (bp) | RFU  |
|--------------|-----------|---------------|-----------|---------|------|
| 1            | 1 (LM)    | 0.0103        | 0         | 15      | 2336 |
| 2            | 48        | 0.0215        | 37        | 114     | 99   |
| 3            | 530       | 7.0081        | 148       | 5187    | 3394 |
| 4            | 6000 (UM) | 0.0090        | 5695      | 7844    | 3131 |
| TIC:         |           | 7.0296        | ng/uL     |         |      |
| TIM:         |           | 17.9214       | nmole/L   |         |      |
| Total Conc.: |           | 7.0413        | ng/uL     |         |      |

Smear Analysis      200 bp to 1200 bp      6.5801 ng/uL      93.4 %Total      18.3244 nmole/L      591 Avg. Size (b.p.)      32.19 %CV

Sample Peak Width (sec): 50      Sample Min Peak Height: 25      Sample Baseline V to V?: Y      Sample Baseline V to V pts: 3  
 Sample Filter: Binomial      # of Pts for Filter: 3      Sample Start Region (min): 0      Sample End Region (min): 50  
 Manual Baseline Start (min): 10      Manual Baseline End (min): 48  
 Marker Peak Width (sec): 5      Marker Min Peak Height: 200      Marker Baseline V to V?: Y      Marker Baseline V to V pts: 3  
 Lower Marker Selection: First Peak > 200 RFU      Upper Marker Selection: Last Peak > 200 RFU  
 Ladder Size (bp): 1, 100, 200, 300, 400, 500, 600, 700, 800, 900, 1000, 1200, 1500, 2000, 3000, 6000  
 Quantification Using: Ladder      Final Concentration (ng/uL): 0.0830      Dilution Factor: 12.0

**Sample:** 103613-001-120

**Well Location:** H9

**Created:** Friday, June 21, 2019 4:25:48 PM

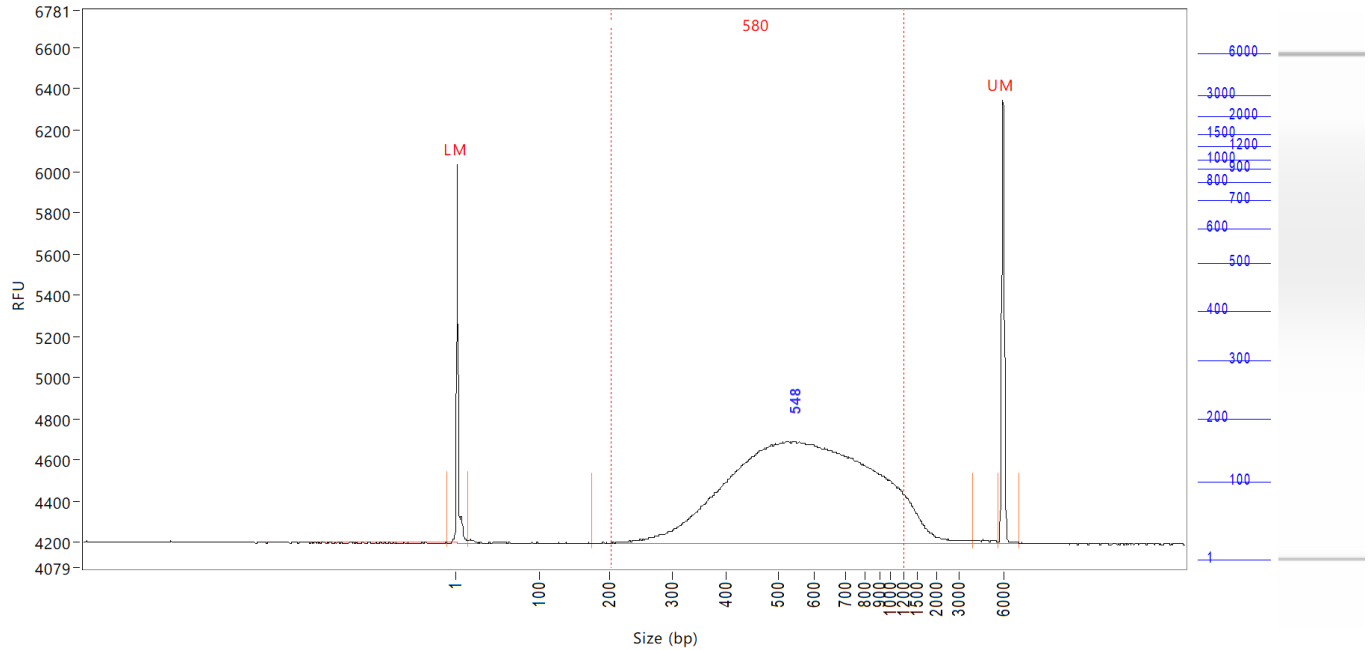

| Peak         | Size (bp) | Conc. (ng/uL) | From (bp) | To (bp) | RFU  |
|--------------|-----------|---------------|-----------|---------|------|
| 1            | 1 (LM)    | 0.0103        | 0         | 15      | 1836 |
| 2            | 548       | 1.3774        | 174       | 3941    | 494  |
| 3            | 6000 (UM) | 0.0070        | 5644      | 7137    | 2156 |
| TIC:         |           | 1.3774        | ng/uL     |         |      |
| TIM:         |           | 3.6094        | nmole/L   |         |      |
| Total Conc.: |           | 1.3858        | ng/uL     |         |      |

Smear Analysis      200 bp to 1200 bp      1.3136 ng/ul      94.8 %Total      3.7300 nmole/L      580 Avg. Size (b.p.)      32.72 %CV

Sample Peak Width (sec): 50    Sample Min Peak Height: 25    Sample Baseline V to V?: Y    Sample Baseline V to V pts: 3  
 Sample Filter: Binomial    # of Pts for Filter: 3    Sample Start Region (min): 0    Sample End Region (min): 50  
 Manual Baseline Start (min): 10    Manual Baseline End (min): 48  
 Marker Peak Width (sec): 5    Marker Min Peak Height: 200    Marker Baseline V to V?: Y    Marker Baseline V to V pts: 3  
 Lower Marker Selection: First Peak > 200 RFU    Upper Marker Selection: Last Peak > 200 RFU  
 Ladder Size (bp): 1, 100, 200, 300, 400, 500, 600, 700, 800, 900, 1000, 1200, 1500, 2000, 3000, 6000  
 Quantification Using: Ladder    Final Concentration (ng/uL): 0.0830    Dilution Factor: 12.0



**Sample:** 103613-001-121

**Well Location:** A10

**Created:** Friday, June 21, 2019 4:25:48 PM

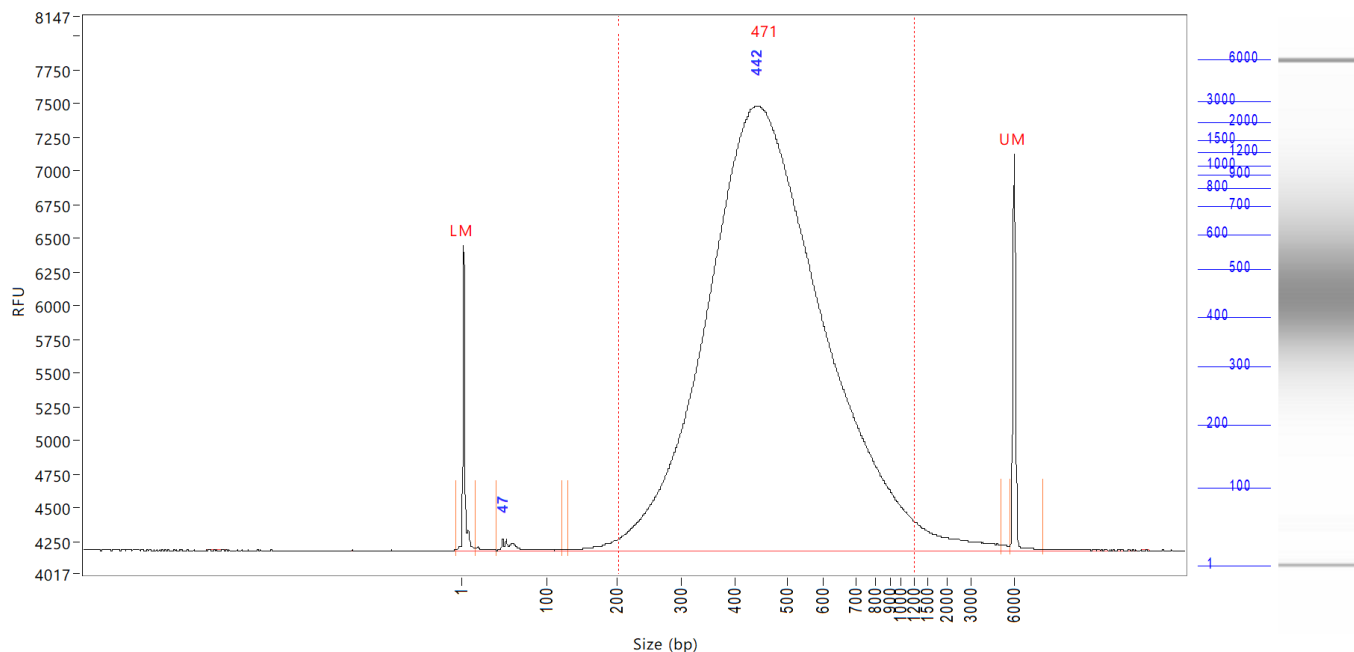

| Peak         | Size (bp) | Conc. (ng/uL) | From (bp) | To (bp) | RFU  |
|--------------|-----------|---------------|-----------|---------|------|
| 1            | 1 (LM)    | 0.0103        | 0         | 15      | 2261 |
| 2            | 47        | 0.0232        | 40        | 121     | 87   |
| 3            | 442       | 5.9690        | 130       | 5110    | 3298 |
| 4            | 6000 (UM) | 0.0079        | 5695      | 7995    | 2936 |
| TIC:         |           | 5.9921        | ng/uL     |         |      |
| TIM:         |           | 20.4450       | nmole/L   |         |      |
| Total Conc.: |           | 5.9995        | ng/uL     |         |      |

Smear Analysis      200 bp to 1200 bp      5.8582 ng/uL      97.6 %Total      20.4507 nmole/L      471 Avg. Size (b.p.)      29.40 %CV

Sample Peak Width (sec): 50      Sample Min Peak Height: 25      Sample Baseline V to V?: Y      Sample Baseline V to V pts: 3  
 Sample Filter: Binomial      # of Pts for Filter: 3      Sample Start Region (min): 0      Sample End Region (min): 50  
 Manual Baseline Start (min): 10      Manual Baseline End (min): 48  
 Marker Peak Width (sec): 5      Marker Min Peak Height: 200      Marker Baseline V to V?: Y      Marker Baseline V to V pts: 3  
 Lower Marker Selection: First Peak > 200 RFU      Upper Marker Selection: Last Peak > 200 RFU  
 Ladder Size (bp): 1, 100, 200, 300, 400, 500, 600, 700, 800, 900, 1000, 1200, 1500, 2000, 3000, 6000  
 Quantification Using: Ladder      Final Concentration (ng/uL): 0.0830      Dilution Factor: 12.0

Sample: 103613-001-122

Well Location: B10

Created: Friday, June 21, 2019 4:25:48 PM

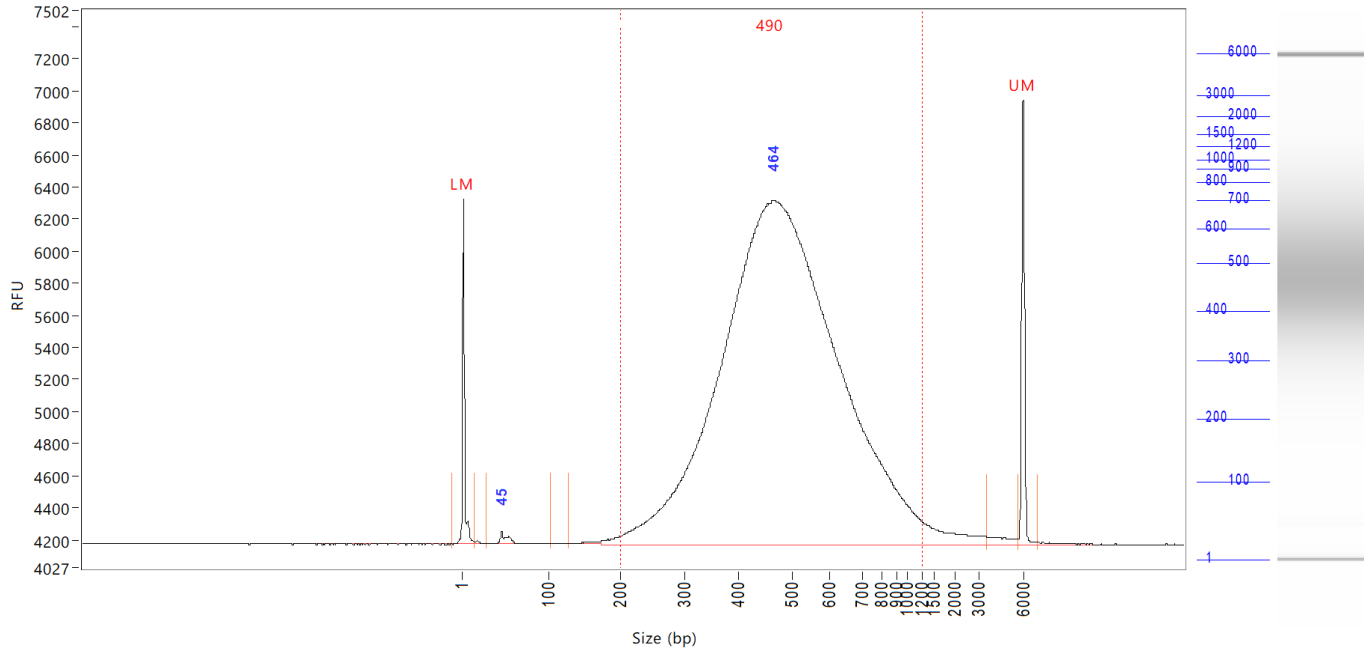

| Peak | Size (bp) | Conc. (ng/uL) | From (bp) | To (bp) | RFU  |
|------|-----------|---------------|-----------|---------|------|
| 1    | 1 (LM)    | 0.0103        | 0         | 15      | 2155 |
| 2    | 45        | 0.0189        | 28        | 104     | 81   |
| 3    | 464       | 4.0377        | 129       | 3586    | 2146 |
| 4    | 6000 (UM) | 0.0081        | 5670      | 6985    | 2777 |

TIC: 4.0565 ng/uL  
 TIM: 13.6411 nmole/L  
 Total Conc.: 4.0735 ng/uL

Smear Analysis      200 bp to 1200 bp      3.9645 ng/uL      97.3 %Total      13.3230 nmole/L      490 Avg. Size (b.p.)      28.86 %CV

Sample Peak Width (sec): 50      Sample Min Peak Height: 25      Sample Baseline V to V?: Y      Sample Baseline V to V pts: 3  
 Sample Filter: Binomial      # of Pts for Filter: 3      Sample Start Region (min): 0      Sample End Region (min): 50  
 Manual Baseline Start (min): 10      Manual Baseline End (min): 48  
 Marker Peak Width (sec): 5      Marker Min Peak Height: 200      Marker Baseline V to V?: Y      Marker Baseline V to V pts: 3  
 Lower Marker Selection: First Peak > 200 RFU      Upper Marker Selection: Last Peak > 200 RFU  
 Ladder Size (bp): 1, 100, 200, 300, 400, 500, 600, 700, 800, 900, 1000, 1200, 1500, 2000, 3000, 6000  
 Quantification Using: Ladder      Final Concentration (ng/uL): 0.0830      Dilution Factor: 12.0

Sample: 103613-001-123

Well Location: C10

Created: Friday, June 21, 2019 4:25:48 PM

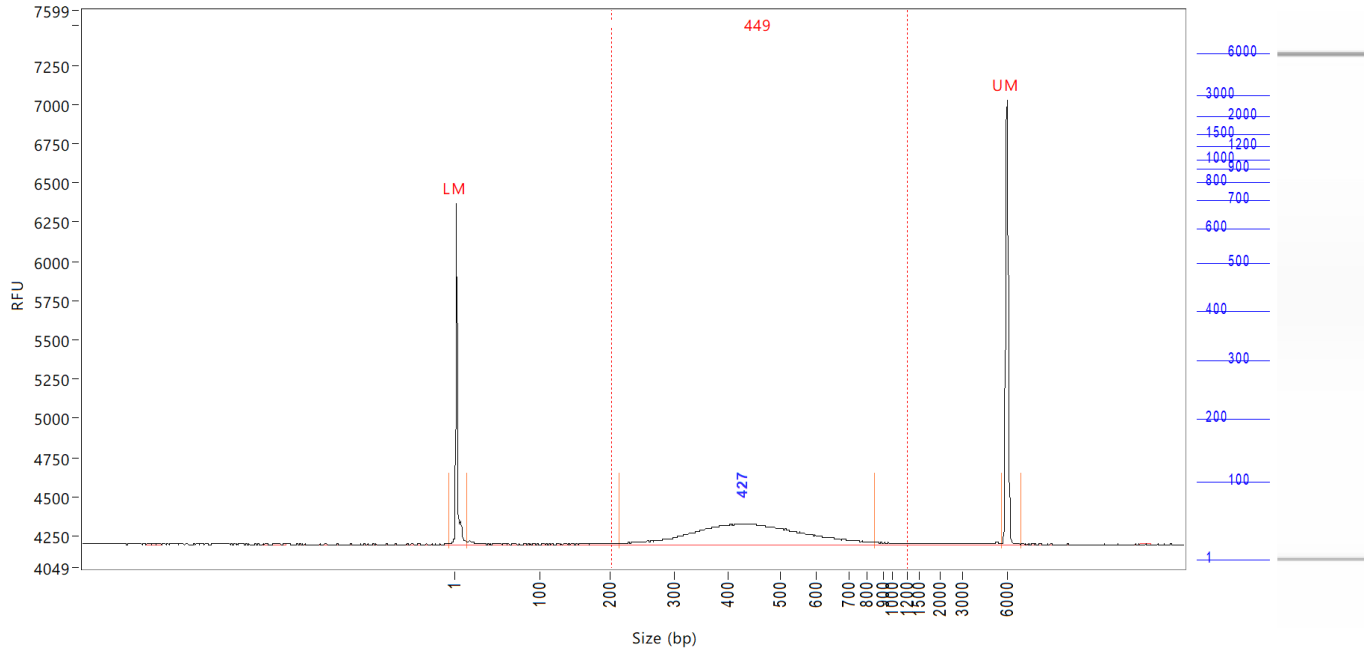

| Peak         | Size (bp) | Conc. (ng/uL) | From (bp) | To (bp) | RFU  |
|--------------|-----------|---------------|-----------|---------|------|
| 1            | 1 (LM)    | 0.0103        | 0         | 15      | 2175 |
| 2            | 427       | 0.2365        | 214       | 853     | 131  |
| 3            | 6000 (UM) | 0.0077        | 5670      | 6935    | 2835 |
| TIC:         |           | 0.2365        | ng/uL     |         |      |
| TIM:         |           | 0.8786        | nmole/L   |         |      |
| Total Conc.: |           | 0.2545        | ng/uL     |         |      |

Smear Analysis      200 bp to 1200 bp      0.2406 ng/uL      94.5 %Total      0.8825 nmole/L      449 Avg. Size (b.p.)      28.29 %CV

Sample Peak Width (sec): 50      Sample Min Peak Height: 25      Sample Baseline V to V?: Y      Sample Baseline V to V pts: 3  
 Sample Filter: Binomial      # of Pts for Filter: 3      Sample Start Region (min): 0      Sample End Region (min): 50  
 Manual Baseline Start (min): 10      Manual Baseline End (min): 48  
 Marker Peak Width (sec): 5      Marker Min Peak Height: 200      Marker Baseline V to V?: Y      Marker Baseline V to V pts: 3  
 Lower Marker Selection: First Peak > 200 RFU      Upper Marker Selection: Last Peak > 200 RFU  
 Ladder Size (bp): 1, 100, 200, 300, 400, 500, 600, 700, 800, 900, 1000, 1200, 1500, 2000, 3000, 6000  
 Quantification Using: Ladder      Final Concentration (ng/uL): 0.0830      Dilution Factor: 12.0

Sample: 103613-001-124

Well Location: D10

Created: Friday, June 21, 2019 4:25:48 PM

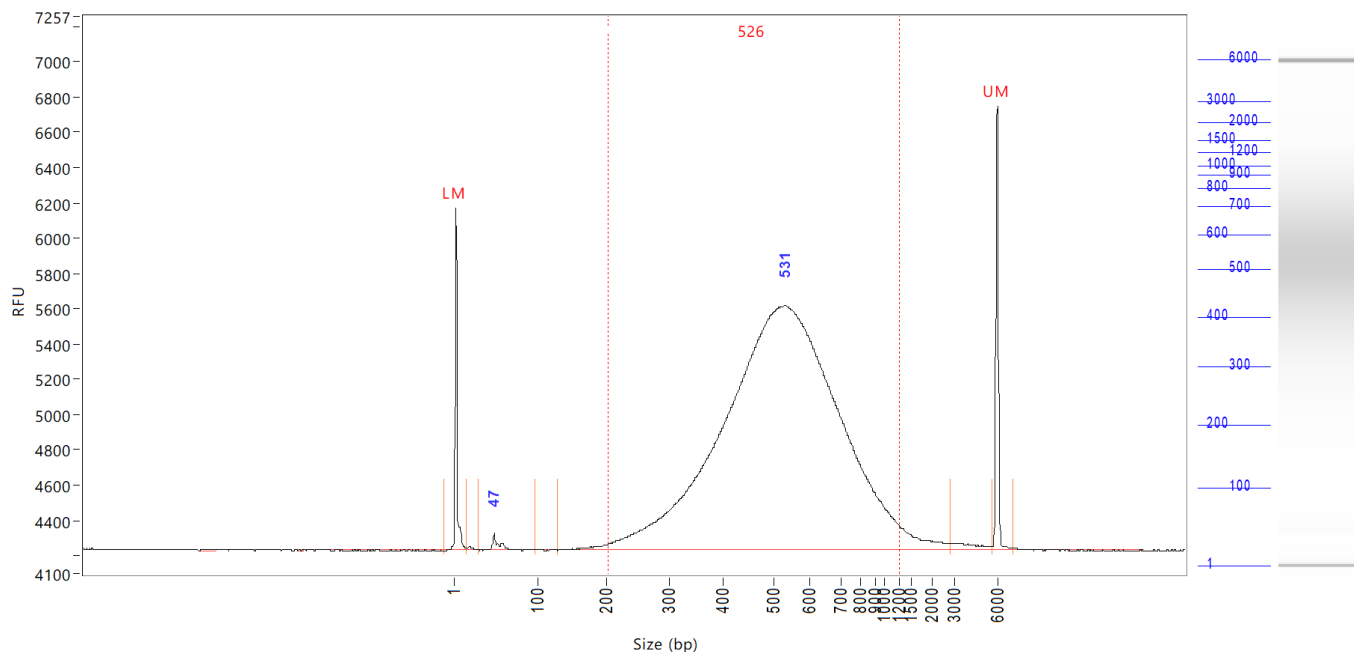

| Peak | Size (bp) | Conc. (ng/uL) | From (bp) | To (bp) | RFU  |
|------|-----------|---------------|-----------|---------|------|
| 1    | 1 (LM)    | 0.0103        | 0         | 15      | 1941 |
| 2    | 47        | 0.0169        | 29        | 96      | 94   |
| 3    | 531       | 2.7944        | 127       | 2834    | 1386 |
| 4    | 6000 (UM) | 0.0077        | 5644      | 7086    | 2520 |

TIC: 2.8114 ng/uL  
 TIM: 8.9977 nmole/L  
 Total Conc.: 2.8295 ng/uL

Smear Analysis      200 bp to 1200 bp      2.7393 ng/uL      96.8 %Total      8.5715 nmole/L      526 Avg. Size (b.p.)      29.15 %CV

Sample Peak Width (sec): 50      Sample Min Peak Height: 25      Sample Baseline V to V?: Y      Sample Baseline V to V pts: 3  
 Sample Filter: Binomial      # of Pts for Filter: 3      Sample Start Region (min): 0      Sample End Region (min): 50  
 Manual Baseline Start (min): 10      Manual Baseline End (min): 48  
 Marker Peak Width (sec): 5      Marker Min Peak Height: 200      Marker Baseline V to V?: Y      Marker Baseline V to V pts: 3  
 Lower Marker Selection: First Peak > 200 RFU      Upper Marker Selection: Last Peak > 200 RFU  
 Ladder Size (bp): 1, 100, 200, 300, 400, 500, 600, 700, 800, 900, 1000, 1200, 1500, 2000, 3000, 6000  
 Quantification Using: Ladder      Final Concentration (ng/uL): 0.0830      Dilution Factor: 12.0

**Sample:** 103613-001-125

**Well Location:** E10

**Created:** Friday, June 21, 2019 4:25:48 PM

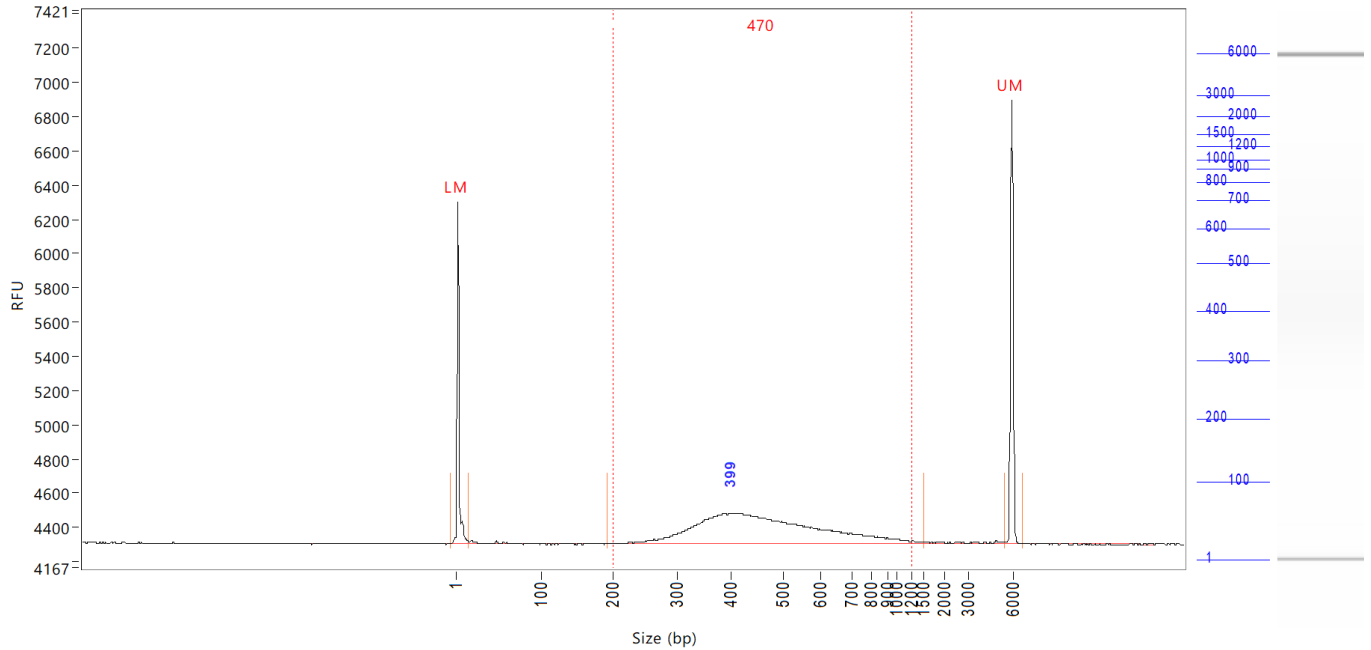

| Peak         | Size (bp) | Conc. (ng/uL) | From (bp) | To (bp) | RFU  |
|--------------|-----------|---------------|-----------|---------|------|
| 1            | 1 (LM)    | 0.0103        | 0         | 15      | 1992 |
| 2            | 399       | 0.3730        | 193       | 1510    | 177  |
| 3            | 6000 (UM) | 0.0077        | 5466      | 6657    | 2596 |
| TIC:         |           | 0.3730        | ng/uL     |         |      |
| TIM:         |           | 1.2921        | nmole/L   |         |      |
| Total Conc.: |           | 0.3870        | ng/uL     |         |      |

Smear Analysis      200 bp to 1200 bp      0.3707 ng/uL      95.8 %Total      1.2970 nmole/L      470 Avg. Size (b.p.)      31.68 %CV

Sample Peak Width (sec): 50      Sample Min Peak Height: 25      Sample Baseline V to V?: Y      Sample Baseline V to V pts: 3  
 Sample Filter: Binomial      # of Pts for Filter: 3      Sample Start Region (min): 0      Sample End Region (min): 50  
 Manual Baseline Start (min): 10      Manual Baseline End (min): 48  
 Marker Peak Width (sec): 5      Marker Min Peak Height: 200      Marker Baseline V to V?: Y      Marker Baseline V to V pts: 3  
 Lower Marker Selection: First Peak > 200 RFU      Upper Marker Selection: Last Peak > 200 RFU  
 Ladder Size (bp): 1, 100, 200, 300, 400, 500, 600, 700, 800, 900, 1000, 1200, 1500, 2000, 3000, 6000  
 Quantification Using: Ladder      Final Concentration (ng/uL): 0.0830      Dilution Factor: 12.0

**Sample:** 103613-001-126

**Well Location:** F10

**Created:** Friday, June 21, 2019 4:25:48 PM

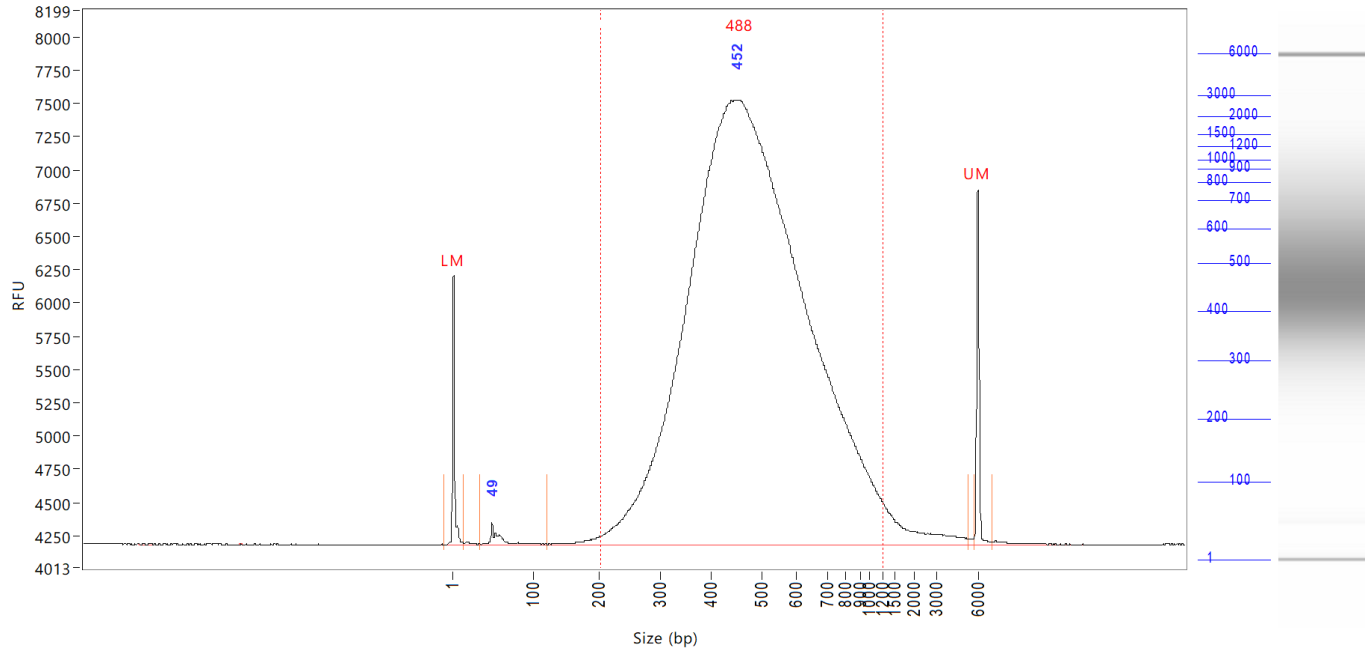

| Peak | Size (bp) | Conc. (ng/uL) | From (bp) | To (bp) | RFU  |
|------|-----------|---------------|-----------|---------|------|
| 1    | 1 (LM)    | 0.0103        | 0         | 15      | 2020 |
| 2    | 49        | 0.0360        | 35        | 121     | 166  |
| 3    | 452       | 6.8553        | 121       | 5288    | 3346 |
| 4    | 6000 (UM) | 0.0080        | 5695      | 6960    | 2665 |

TIC: 6.8913 ng/uL  
 TIM: 22.8721 nmole/L  
 Total Conc.: 6.8977 ng/uL

Smear Analysis      200 bp to 1200 bp      6.7234 ng/uL      97.5 %Total      22.6689 nmole/L      488 Avg. Size (b.p.)      30.42 %CV

Sample Peak Width (sec): 50      Sample Min Peak Height: 25      Sample Baseline V to V?: Y      Sample Baseline V to V pts: 3  
 Sample Filter: Binomial      # of Pts for Filter: 3      Sample Start Region (min): 0      Sample End Region (min): 50  
 Manual Baseline Start (min): 10      Manual Baseline End (min): 48  
 Marker Peak Width (sec): 5      Marker Min Peak Height: 200      Marker Baseline V to V?: Y      Marker Baseline V to V pts: 3  
 Lower Marker Selection: First Peak > 200 RFU      Upper Marker Selection: Last Peak > 200 RFU  
 Ladder Size (bp): 1, 100, 200, 300, 400, 500, 600, 700, 800, 900, 1000, 1200, 1500, 2000, 3000, 6000  
 Quantification Using: Ladder      Final Concentration (ng/uL): 0.0830      Dilution Factor: 12.0

Sample: 103613-001-127

Well Location: G10

Created: Friday, June 21, 2019 4:25:48 PM

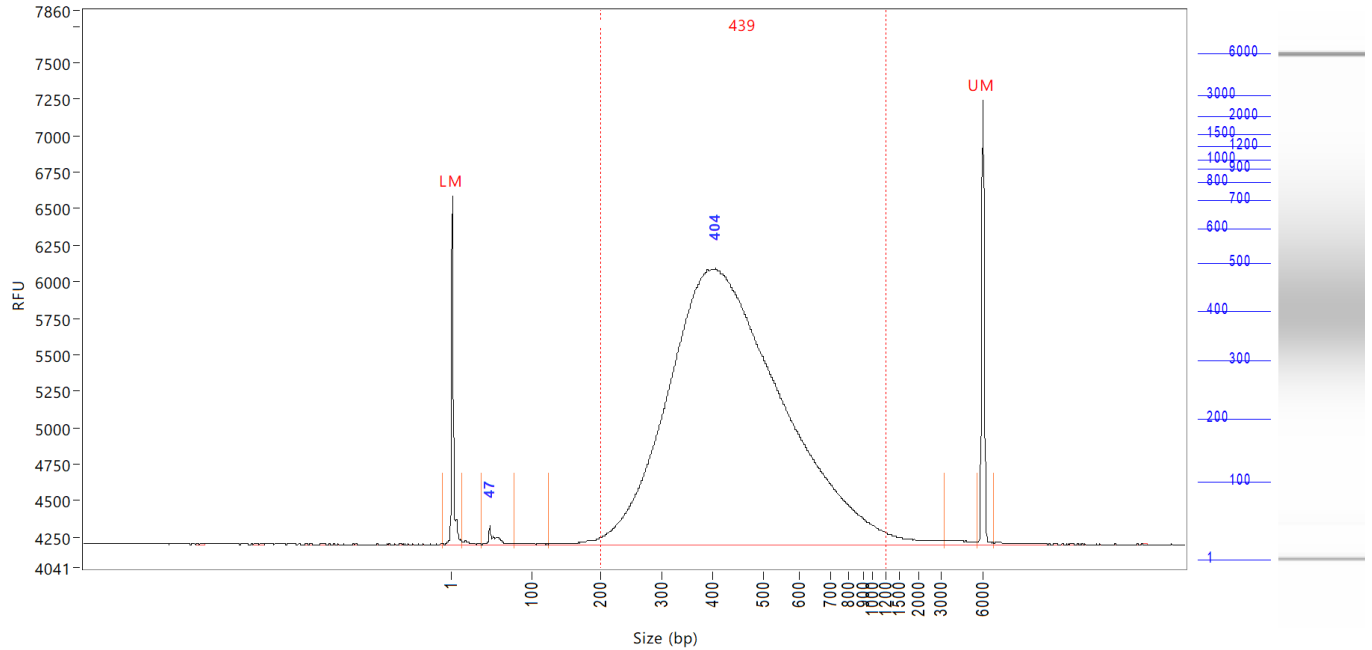

| Peak | Size (bp) | Conc. (ng/uL) | From (bp) | To (bp) | RFU  |
|------|-----------|---------------|-----------|---------|------|
| 1    | 1 (LM)    | 0.0103        | 0         | 15      | 2391 |
| 2    | 47        | 0.0165        | 38        | 77      | 132  |
| 3    | 404       | 3.2161        | 123       | 3331    | 1890 |
| 4    | 6000 (UM) | 0.0075        | 5568      | 6808    | 3049 |

TIC: 3.2326 ng/uL  
 TIM: 12.3230 nmole/L  
 Total Conc.: 3.2456 ng/uL

Smear Analysis      200 bp to 1200 bp      3.1823 ng/uL      98.0 %Total      11.9212 nmole/L      439 Avg. Size (b.p.)      29.85 %CV

Sample Peak Width (sec): 50      Sample Min Peak Height: 25      Sample Baseline V to V?: Y      Sample Baseline V to V pts: 3  
 Sample Filter: Binomial      # of Pts for Filter: 3      Sample Start Region (min): 0      Sample End Region (min): 50  
 Manual Baseline Start (min): 10      Manual Baseline End (min): 48  
 Marker Peak Width (sec): 5      Marker Min Peak Height: 200      Marker Baseline V to V?: Y      Marker Baseline V to V pts: 3  
 Lower Marker Selection: First Peak > 200 RFU      Upper Marker Selection: Last Peak > 200 RFU  
 Ladder Size (bp): 1, 100, 200, 300, 400, 500, 600, 700, 800, 900, 1000, 1200, 1500, 2000, 3000, 6000  
 Quantification Using: Ladder      Final Concentration (ng/uL): 0.0830      Dilution Factor: 12.0

Sample: 103613-001-128

Well Location: H10

Created: Friday, June 21, 2019 4:25:48 PM

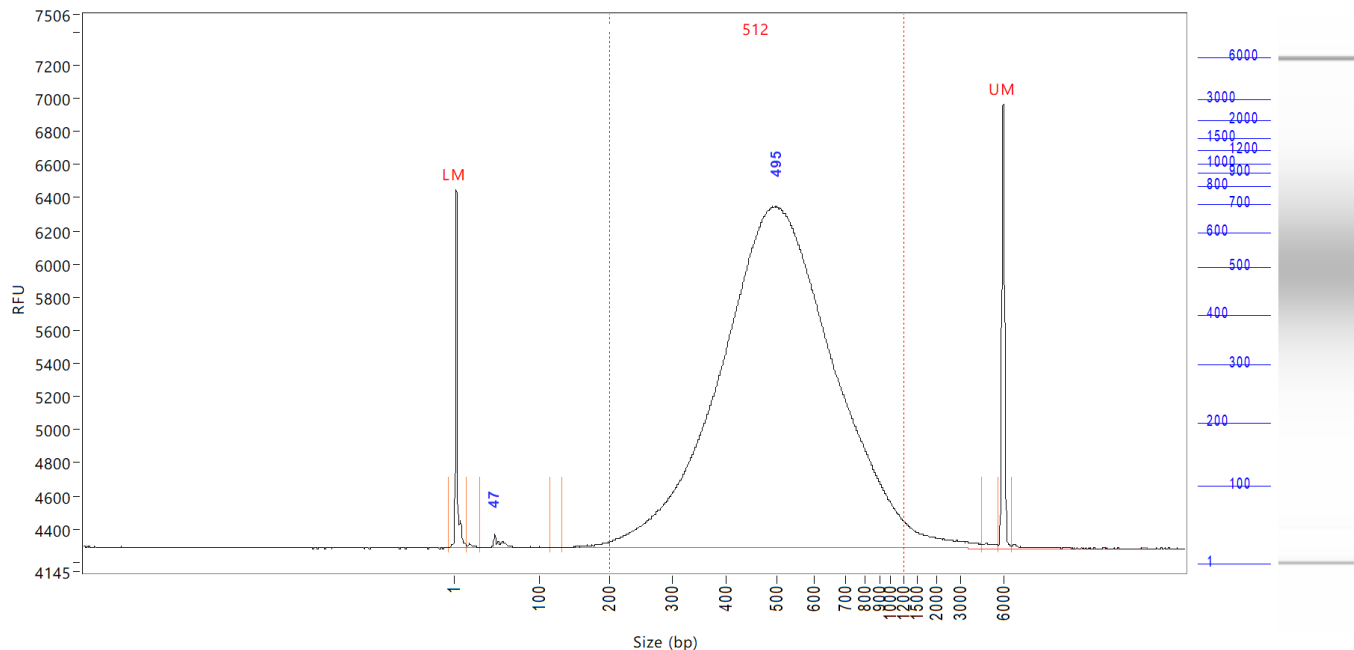

| Peak         | Size (bp) | Conc. (ng/uL) | From (bp) | To (bp) | RFU  |
|--------------|-----------|---------------|-----------|---------|------|
| 1            | 1 (LM)    | 0.0103        | 0         | 15      | 2156 |
| 2            | 47        | 0.0142        | 30        | 115     | 84   |
| 3            | 495       | 3.6702        | 132       | 4551    | 2061 |
| 4            | 6000 (UM) | 0.0075        | 5644      | 6530    | 2684 |
| TIC:         |           | 3.6845        | ng/uL     |         |      |
| TIM:         |           | 11.7267       | nmole/L   |         |      |
| Total Conc.: |           | 3.6913        | ng/uL     |         |      |

Smear Analysis      200 bp to 1200 bp      3.6053 ng/uL      97.7 %Total      11.5819 nmole/L      512 Avg. Size (b.p.)      28.36 %CV

Sample Peak Width (sec): 50      Sample Min Peak Height: 25      Sample Baseline V to V?: Y      Sample Baseline V to V pts: 3  
 Sample Filter: Binomial      # of Pts for Filter: 3      Sample Start Region (min): 0      Sample End Region (min): 50  
 Manual Baseline Start (min): 10      Manual Baseline End (min): 48  
 Marker Peak Width (sec): 5      Marker Min Peak Height: 200      Marker Baseline V to V?: Y      Marker Baseline V to V pts: 3  
 Lower Marker Selection: First Peak > 200 RFU      Upper Marker Selection: Last Peak > 200 RFU  
 Ladder Size (bp): 1, 100, 200, 300, 400, 500, 600, 700, 800, 900, 1000, 1200, 1500, 2000, 3000, 6000  
 Quantification Using: Ladder      Final Concentration (ng/uL): 0.0830      Dilution Factor: 12.0



Sample: 103613-001-129

Well Location: A11

Created: Friday, June 21, 2019 4:25:48 PM

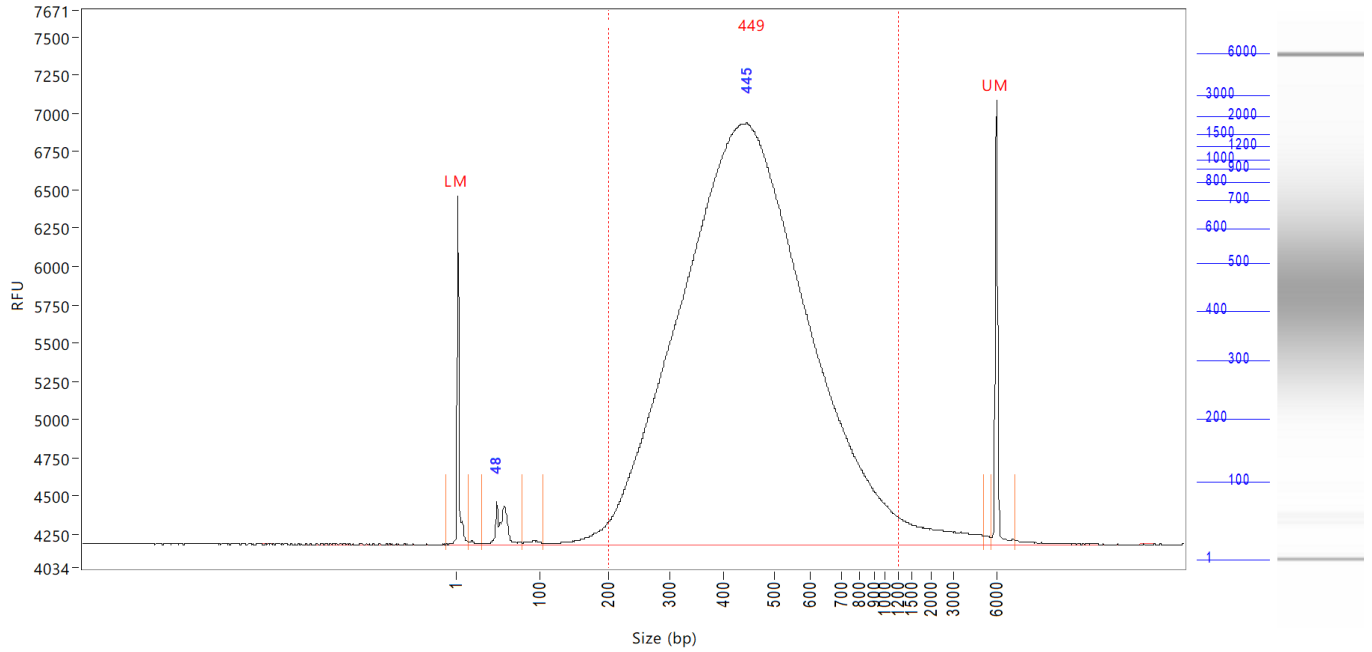

| Peak | Size (bp) | Conc. (ng/uL) | From (bp) | To (bp) | RFU  |
|------|-----------|---------------|-----------|---------|------|
| 1    | 1 (LM)    | 0.0103        | 0         | 15      | 2273 |
| 2    | 48        | 0.0620        | 31        | 78      | 283  |
| 3    | 445       | 5.6399        | 106       | 5110    | 2752 |
| 4    | 6000 (UM) | 0.0080        | 5619      | 7313    | 2906 |

TIC: 5.7018 ng/uL  
 TIM: 21.3763 nmole/L  
 Total Conc.: 5.7164 ng/uL

Smear Analysis      200 bp to 1200 bp      5.5045 ng/uL      96.3 %Total      20.1892 nmole/L      449 Avg. Size (b.p.)      31.42 %CV

Sample Peak Width (sec): 50      Sample Min Peak Height: 25      Sample Baseline V to V?: Y      Sample Baseline V to V pts: 3  
 Sample Filter: Binomial      # of Pts for Filter: 3      Sample Start Region (min): 0      Sample End Region (min): 50  
 Manual Baseline Start (min): 10      Manual Baseline End (min): 48  
 Marker Peak Width (sec): 5      Marker Min Peak Height: 200      Marker Baseline V to V?: Y      Marker Baseline V to V pts: 3  
 Lower Marker Selection: First Peak > 200 RFU      Upper Marker Selection: Last Peak > 200 RFU  
 Ladder Size (bp): 1, 100, 200, 300, 400, 500, 600, 700, 800, 900, 1000, 1200, 1500, 2000, 3000, 6000  
 Quantification Using: Ladder      Final Concentration (ng/uL): 0.0830      Dilution Factor: 12.0

**Sample:** 103613-001-130

**Well Location:** B11

**Created:** Friday, June 21, 2019 4:25:48 PM

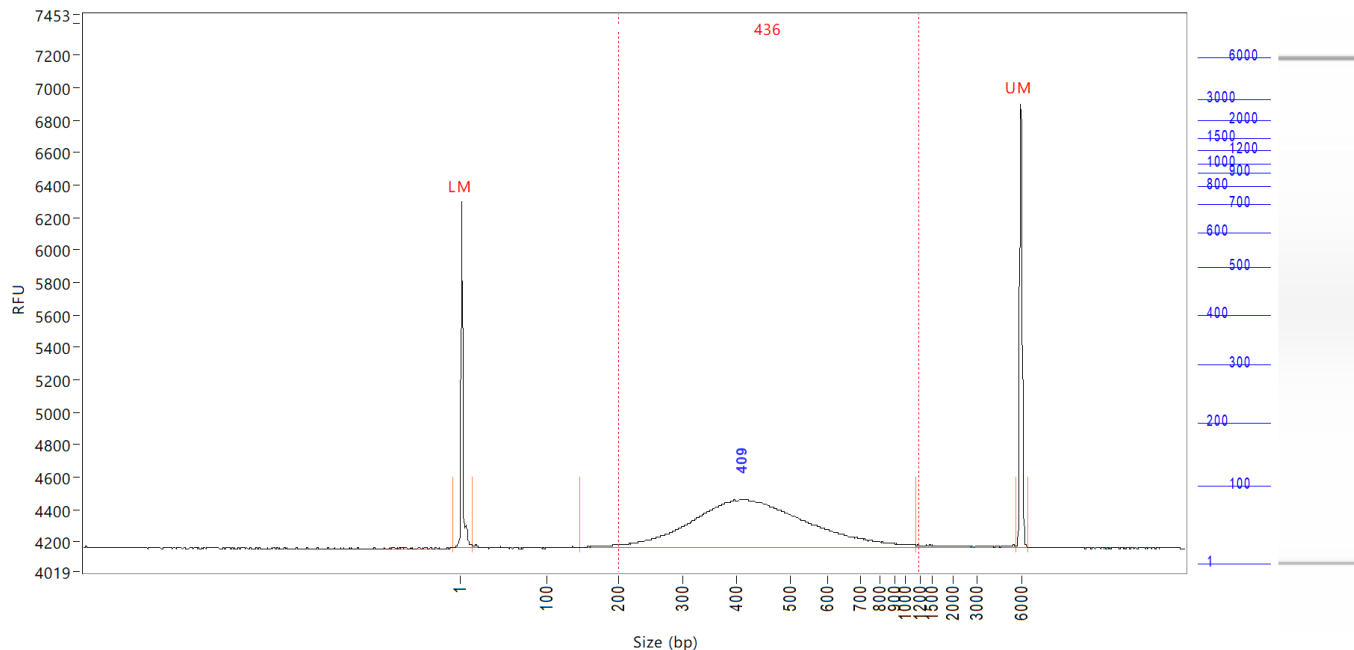

| Peak         | Size (bp) | Conc. (ng/uL) | From (bp) | To (bp) | RFU  |
|--------------|-----------|---------------|-----------|---------|------|
| 1            | 1 (LM)    | 0.0103        | 0         | 14      | 2140 |
| 2            | 409       | 0.5889        | 145       | 1157    | 299  |
| 3            | 6000 (UM) | 0.0074        | 5695      | 6505    | 2739 |
| TIC:         |           | 0.5889        | ng/uL     |         |      |
| TIM:         |           | 2.2480        | nmole/L   |         |      |
| Total Conc.: |           | 0.6089        | ng/uL     |         |      |

Smear Analysis      200 bp to 1200 bp      0.5804 ng/uL      95.3 %Total      2.1895 nmole/L      436 Avg. Size (b.p.)      30.24 %CV

Sample Peak Width (sec): 50      Sample Min Peak Height: 25      Sample Baseline V to V?: Y      Sample Baseline V to V pts: 3  
 Sample Filter: Binomial      # of Pts for Filter: 3      Sample Start Region (min): 0      Sample End Region (min): 50  
 Manual Baseline Start (min): 10      Manual Baseline End (min): 48  
 Marker Peak Width (sec): 5      Marker Min Peak Height: 200      Marker Baseline V to V?: Y      Marker Baseline V to V pts: 3  
 Lower Marker Selection: First Peak > 200 RFU      Upper Marker Selection: Last Peak > 200 RFU  
 Ladder Size (bp): 1, 100, 200, 300, 400, 500, 600, 700, 800, 900, 1000, 1200, 1500, 2000, 3000, 6000  
 Quantification Using: Ladder      Final Concentration (ng/uL): 0.0830      Dilution Factor: 12.0

Sample: 103613-001-131

Well Location: C11

Created: Friday, June 21, 2019 4:25:48 PM

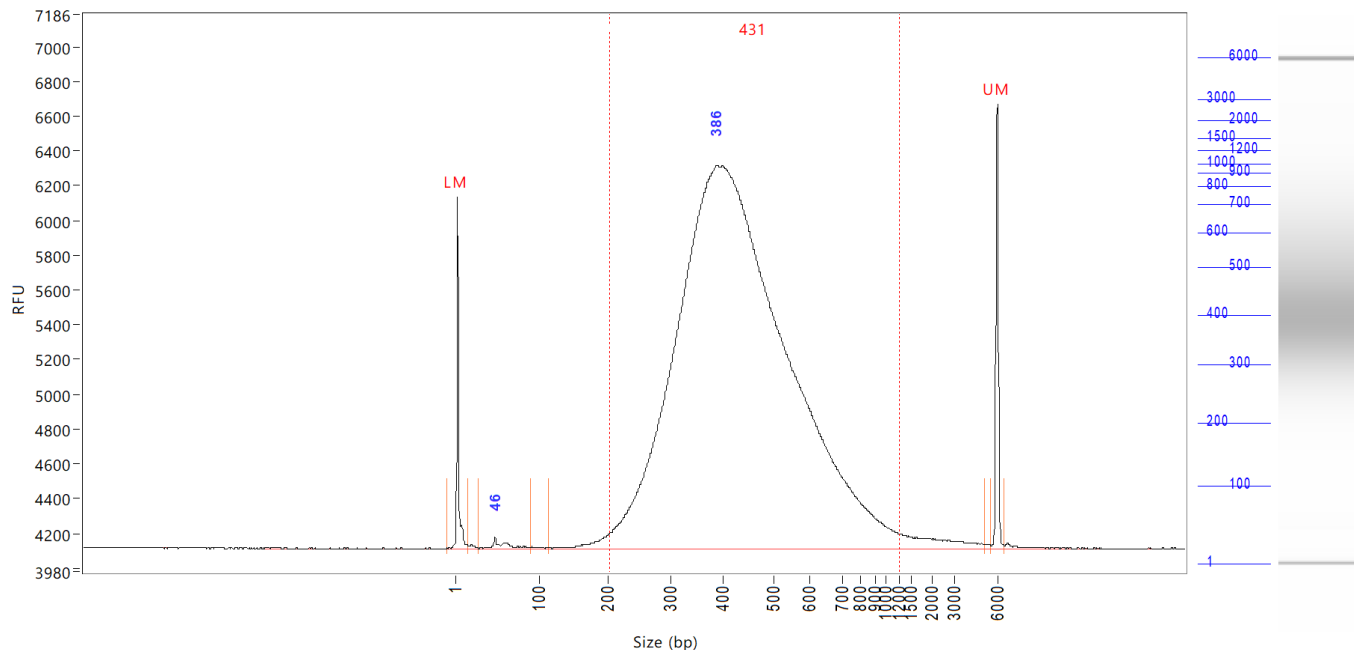

| Peak | Size (bp) | Conc. (ng/uL) | From (bp) | To (bp) | RFU  |
|------|-----------|---------------|-----------|---------|------|
| 1    | 1 (LM)    | 0.0103        | 0         | 15      | 2019 |
| 2    | 46        | 0.0180        | 27        | 89      | 68   |
| 3    | 386       | 4.4189        | 113       | 5110    | 2205 |
| 4    | 6000 (UM) | 0.0075        | 5568      | 6505    | 2561 |

TIC: 4.4370 ng/uL  
 TIM: 16.6407 nmole/L  
 Total Conc.: 4.4441 ng/uL

Smear Analysis      200 bp to 1200 bp      4.3422 ng/uL      97.7 %Total      16.5758 nmole/L      431 Avg. Size (b.p.)      29.74 %CV

Sample Peak Width (sec): 50      Sample Min Peak Height: 25      Sample Baseline V to V?: Y      Sample Baseline V to V pts: 3  
 Sample Filter: Binomial      # of Pts for Filter: 3      Sample Start Region (min): 0      Sample End Region (min): 50  
 Manual Baseline Start (min): 10      Manual Baseline End (min): 48  
 Marker Peak Width (sec): 5      Marker Min Peak Height: 200      Marker Baseline V to V?: Y      Marker Baseline V to V pts: 3  
 Lower Marker Selection: First Peak > 200 RFU      Upper Marker Selection: Last Peak > 200 RFU  
 Ladder Size (bp): 1, 100, 200, 300, 400, 500, 600, 700, 800, 900, 1000, 1200, 1500, 2000, 3000, 6000  
 Quantification Using: Ladder      Final Concentration (ng/uL): 0.0830      Dilution Factor: 12.0

Sample: 103613-001-132

Well Location: D11

Created: Friday, June 21, 2019 4:25:48 PM

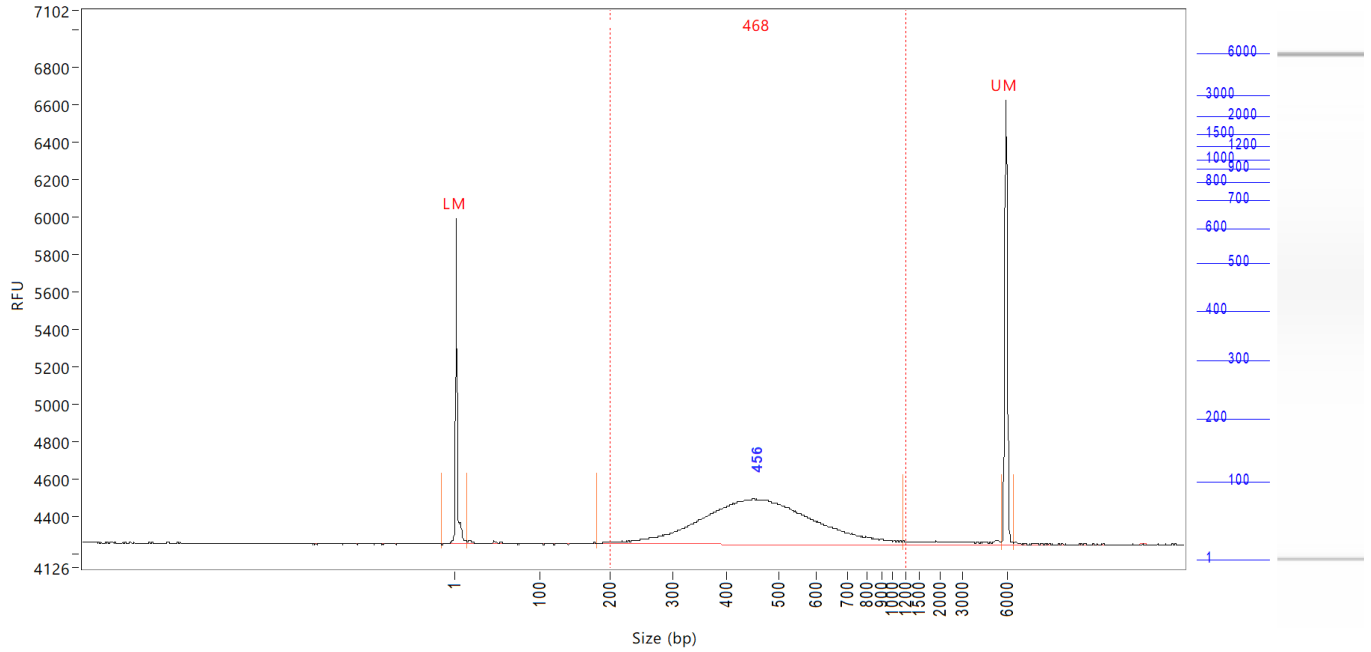

| Peak         | Size (bp) | Conc. (ng/uL) | From (bp) | To (bp) | RFU  |
|--------------|-----------|---------------|-----------|---------|------|
| 1            | 1 (LM)    | 0.0103        | 0         | 15      | 1734 |
| 2            | 456       | 0.5554        | 182       | 1162    | 241  |
| 3            | 6000 (UM) | 0.0080        | 5695      | 6505    | 2378 |
| TIC:         |           | 0.5554        | ng/uL     |         |      |
| TIM:         |           | 1.9610        | nmole/L   |         |      |
| Total Conc.: |           | 0.5839        | ng/uL     |         |      |

Smear Analysis      200 bp to 1200 bp      0.5539 ng/ul      94.9 %Total      1.9489 nmole/L      468 Avg. Size (b.p.)      28.61 %CV

Sample Peak Width (sec): 50    Sample Min Peak Height: 25    Sample Baseline V to V?: Y    Sample Baseline V to V pts: 3  
 Sample Filter: Binomial    # of Pts for Filter: 3    Sample Start Region (min): 0    Sample End Region (min): 50  
 Manual Baseline Start (min): 10    Manual Baseline End (min): 48  
 Marker Peak Width (sec): 5    Marker Min Peak Height: 200    Marker Baseline V to V?: Y    Marker Baseline V to V pts: 3  
 Lower Marker Selection: First Peak > 200 RFU    Upper Marker Selection: Last Peak > 200 RFU  
 Ladder Size (bp): 1, 100, 200, 300, 400, 500, 600, 700, 800, 900, 1000, 1200, 1500, 2000, 3000, 6000  
 Quantification Using: Ladder    Final Concentration (ng/uL): 0.0830    Dilution Factor: 12.0

Sample: 103613-001-133

Well Location: E11

Created: Friday, June 21, 2019 4:25:48 PM

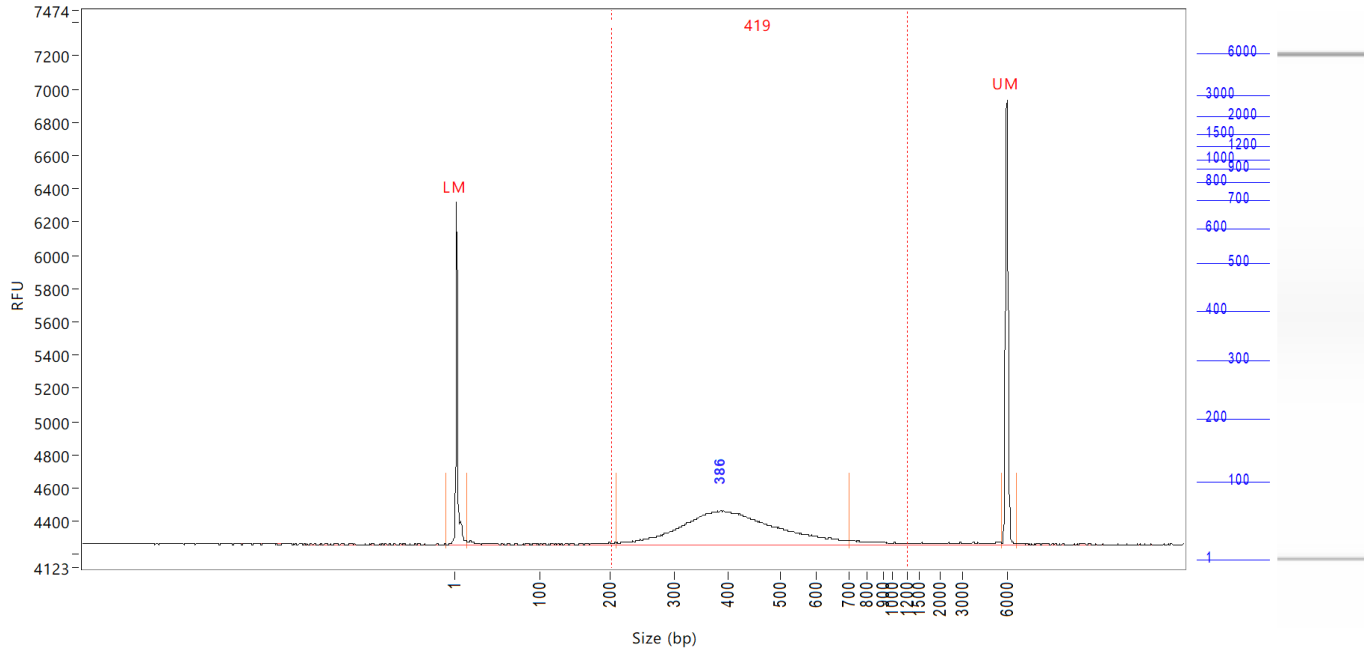

| Peak         | Size (bp) | Conc. (ng/uL) | From (bp) | To (bp) | RFU  |
|--------------|-----------|---------------|-----------|---------|------|
| 1            | 1 (LM)    | 0.0103        | 0         | 15      | 2058 |
| 2            | 386       | 0.3297        | 209       | 703     | 201  |
| 3            | 6000 (UM) | 0.0076        | 5670      | 6657    | 2676 |
| TIC:         |           | 0.3297        | ng/uL     |         |      |
| TIM:         |           | 1.3297        | nmole/L   |         |      |
| Total Conc.: |           | 0.3558        | ng/uL     |         |      |

Smear Analysis      200 bp to 1200 bp      0.3394 ng/ul      95.4 %Total      1.3331 nmole/L      419 Avg. Size (b.p.)      28.11 %CV

Sample Peak Width (sec): 50      Sample Min Peak Height: 25      Sample Baseline V to V?: Y      Sample Baseline V to V pts: 3  
 Sample Filter: Binomial      # of Pts for Filter: 3      Sample Start Region (min): 0      Sample End Region (min): 50  
 Manual Baseline Start (min): 10      Manual Baseline End (min): 48  
 Marker Peak Width (sec): 5      Marker Min Peak Height: 200      Marker Baseline V to V?: Y      Marker Baseline V to V pts: 3  
 Lower Marker Selection: First Peak > 200 RFU      Upper Marker Selection: Last Peak > 200 RFU  
 Ladder Size (bp): 1, 100, 200, 300, 400, 500, 600, 700, 800, 900, 1000, 1200, 1500, 2000, 3000, 6000  
 Quantification Using: Ladder      Final Concentration (ng/uL): 0.0830      Dilution Factor: 12.0

**Sample:** 103613-001-134

**Well Location:** F11

**Created:** Friday, June 21, 2019 4:25:48 PM

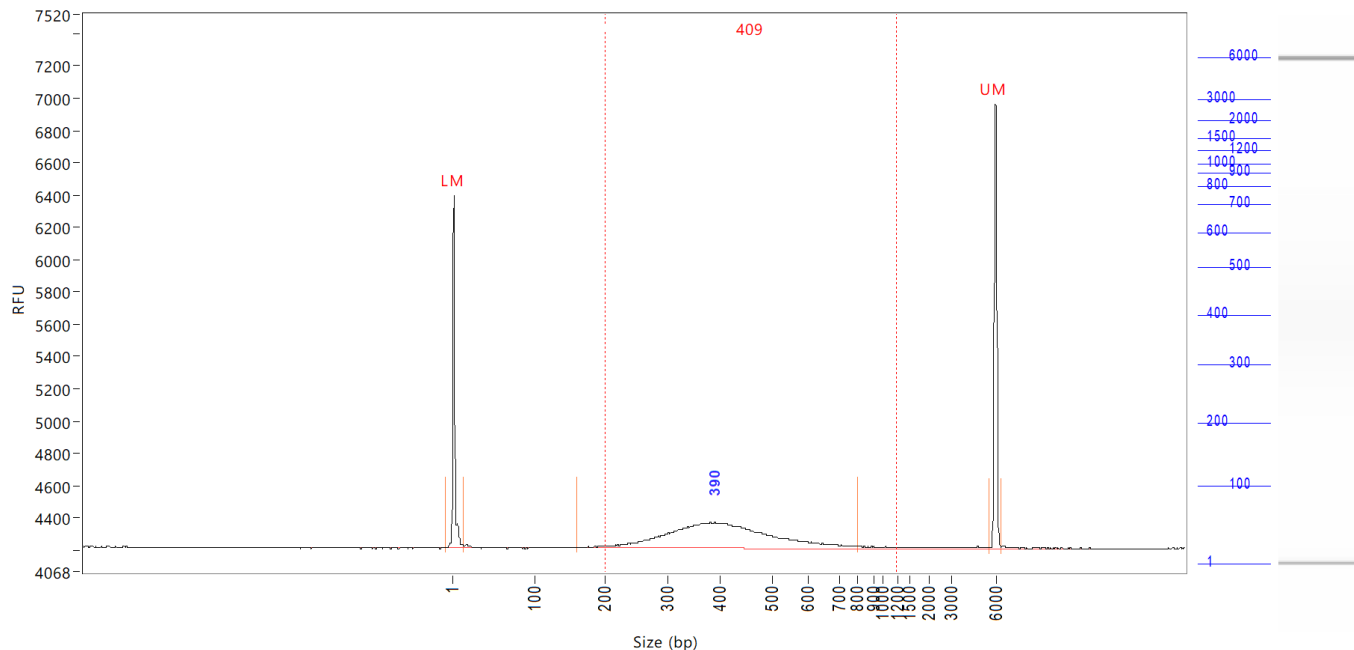

| Peak         | Size (bp) | Conc. (ng/uL) | From (bp) | To (bp) | RFU  |
|--------------|-----------|---------------|-----------|---------|------|
| 1            | 1 (LM)    | 0.0103        | 0         | 14      | 2180 |
| 2            | 390       | 0.2804        | 160       | 801     | 159  |
| 3            | 6000 (UM) | 0.0075        | 5619      | 6429    | 2757 |
| TIC:         |           | 0.2804        | ng/uL     |         |      |
| TIM:         |           | 1.1563        | nmole/L   |         |      |
| Total Conc.: |           | 0.2981        | ng/uL     |         |      |

Smear Analysis      200 bp to 1200 bp      0.2804 ng/ul      94.1 %Total      1.1290 nmole/L      409 Avg. Size (b.p.)      29.62 %CV

Sample Peak Width (sec): 50      Sample Min Peak Height: 25      Sample Baseline V to V?: Y      Sample Baseline V to V pts: 3  
 Sample Filter: Binomial      # of Pts for Filter: 3      Sample Start Region (min): 0      Sample End Region (min): 50  
 Manual Baseline Start (min): 10      Manual Baseline End (min): 48  
 Marker Peak Width (sec): 5      Marker Min Peak Height: 200      Marker Baseline V to V?: Y      Marker Baseline V to V pts: 3  
 Lower Marker Selection: First Peak > 200 RFU      Upper Marker Selection: Last Peak > 200 RFU  
 Ladder Size (bp): 1, 100, 200, 300, 400, 500, 600, 700, 800, 900, 1000, 1200, 1500, 2000, 3000, 6000  
 Quantification Using: Ladder      Final Concentration (ng/uL): 0.0830      Dilution Factor: 12.0

Sample: 103613-001-135

Well Location: G11

Created: Friday, June 21, 2019 4:25:48 PM

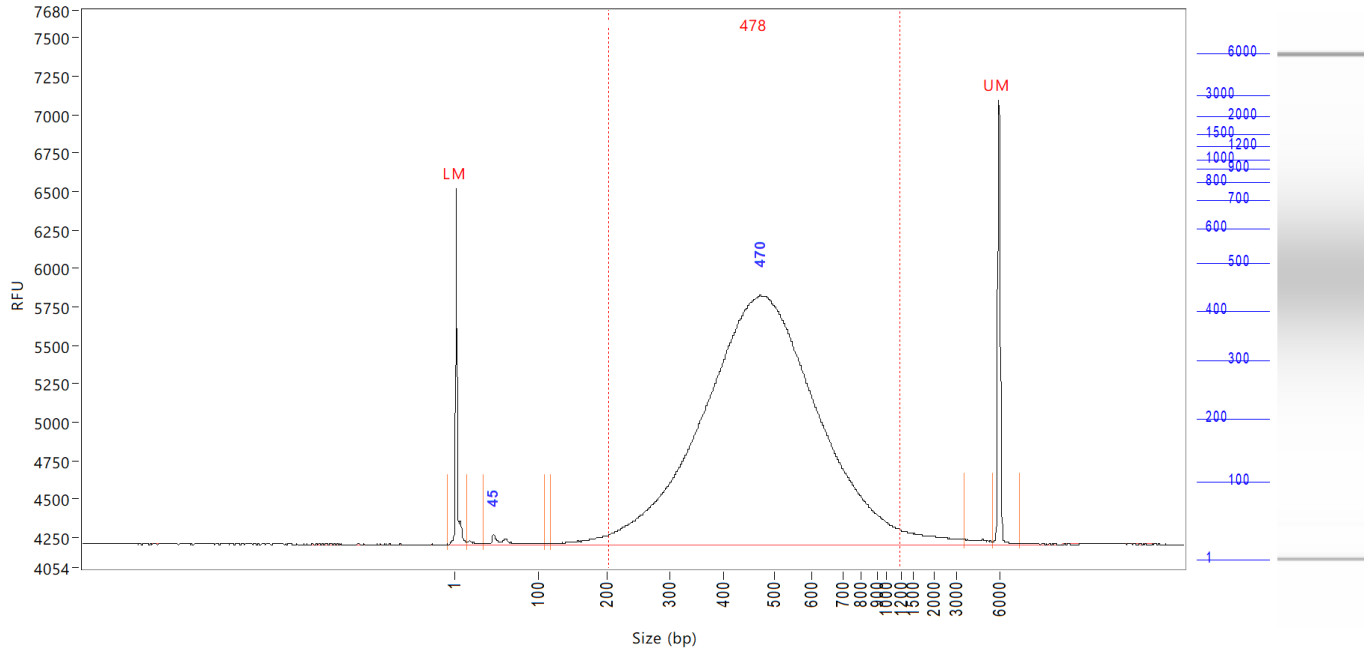

| Peak | Size (bp) | Conc. (ng/uL) | From (bp) | To (bp) | RFU  |
|------|-----------|---------------|-----------|---------|------|
| 1    | 1 (LM)    | 0.0103        | 0         | 15      | 2314 |
| 2    | 45        | 0.0170        | 35        | 108     | 69   |
| 3    | 470       | 2.8513        | 117       | 3586    | 1621 |
| 4    | 6000 (UM) | 0.0074        | 5543      | 7389    | 2895 |

TIC: 2.8682 ng/uL  
 TIM: 9.9611 nmole/L  
 Total Conc.: 2.8796 ng/uL

Smear Analysis      200 bp to 1200 bp      2.7907 ng/uL      96.9 %Total      9.6042 nmole/L      478 Avg. Size (b.p.)      28.66 %CV

Sample Peak Width (sec): 50      Sample Min Peak Height: 25      Sample Baseline V to V?: Y      Sample Baseline V to V pts: 3  
 Sample Filter: Binomial      # of Pts for Filter: 3      Sample Start Region (min): 0      Sample End Region (min): 50  
 Manual Baseline Start (min): 10      Manual Baseline End (min): 48  
 Marker Peak Width (sec): 5      Marker Min Peak Height: 200      Marker Baseline V to V?: Y      Marker Baseline V to V pts: 3  
 Lower Marker Selection: First Peak > 200 RFU      Upper Marker Selection: Last Peak > 200 RFU  
 Ladder Size (bp): 1, 100, 200, 300, 400, 500, 600, 700, 800, 900, 1000, 1200, 1500, 2000, 3000, 6000  
 Quantification Using: Ladder      Final Concentration (ng/uL): 0.0830      Dilution Factor: 12.0

Sample: 103613-001-136

Well Location: H11

Created: Friday, June 21, 2019 4:25:48 PM

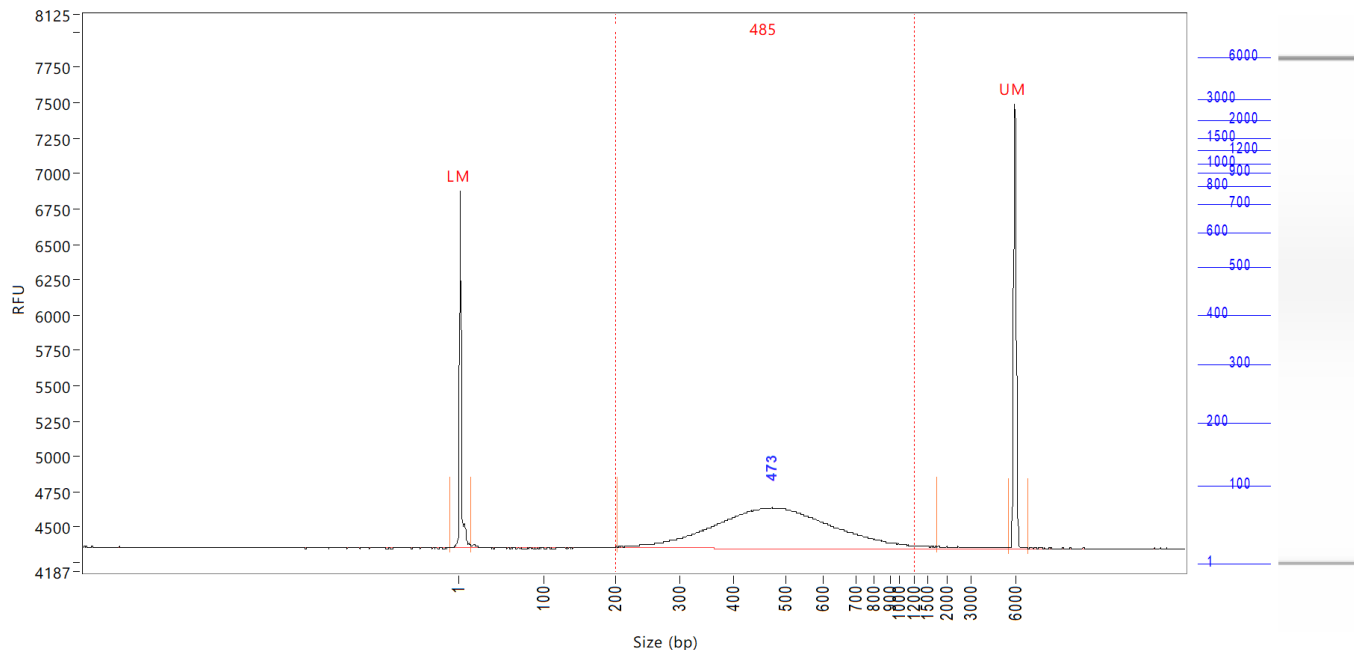

| Peak         | Size (bp) | Conc. (ng/uL) | From (bp) | To (bp) | RFU  |
|--------------|-----------|---------------|-----------|---------|------|
| 1            | 1 (LM)    | 0.0103        | 0         | 14      | 2520 |
| 2            | 473       | 0.4661        | 203       | 1760    | 287  |
| 3            | 6000 (UM) | 0.0073        | 5593      | 6935    | 3145 |
| TIC:         |           | 0.4661        | ng/uL     |         |      |
| TIM:         |           | 1.5588        | nmole/L   |         |      |
| Total Conc.: |           | 0.4789        | ng/uL     |         |      |

Smear Analysis      200 bp to 1200 bp      0.4631 ng/uL      96.7 %Total      1.5713 nmole/L      485 Avg. Size (b.p.)      28.83 %CV

Sample Peak Width (sec): 50      Sample Min Peak Height: 25      Sample Baseline V to V?: Y      Sample Baseline V to V pts: 3  
 Sample Filter: Binomial      # of Pts for Filter: 3      Sample Start Region (min): 0      Sample End Region (min): 50  
 Manual Baseline Start (min): 10      Manual Baseline End (min): 48  
 Marker Peak Width (sec): 5      Marker Min Peak Height: 200      Marker Baseline V to V?: Y      Marker Baseline V to V pts: 3  
 Lower Marker Selection: First Peak > 200 RFU      Upper Marker Selection: Last Peak > 200 RFU  
 Ladder Size (bp): 1, 100, 200, 300, 400, 500, 600, 700, 800, 900, 1000, 1200, 1500, 2000, 3000, 6000  
 Quantification Using: Ladder      Final Concentration (ng/uL): 0.0830      Dilution Factor: 12.0



Sample: 103613-001-137

Well Location: A12

Created: Friday, June 21, 2019 4:25:48 PM

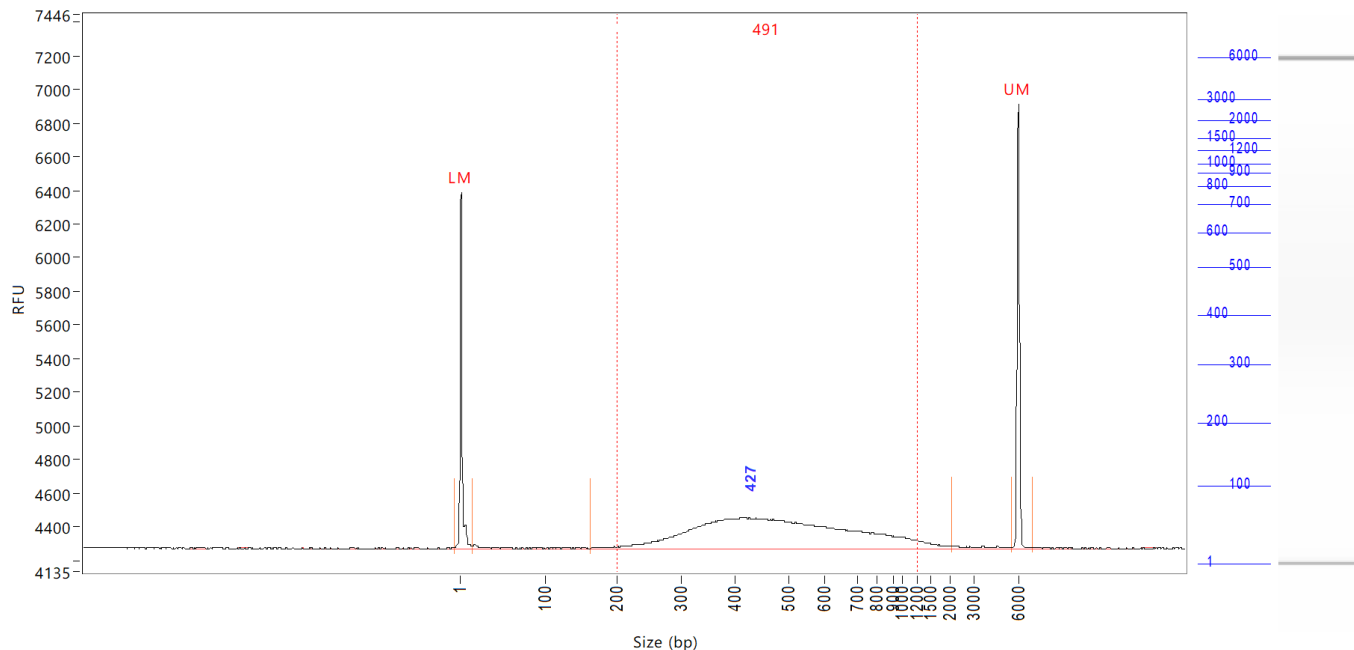

| Peak         | Size (bp) | Conc. (ng/uL) | From (bp) | To (bp) | RFU  |
|--------------|-----------|---------------|-----------|---------|------|
| 1            | 1 (LM)    | 0.0103        | 0         | 15      | 2121 |
| 2            | 427       | 0.4689        | 162       | 2051    | 183  |
| 3            | 6000 (UM) | 0.0071        | 5543      | 6960    | 2644 |
| TIC:         |           | 0.4689        | ng/uL     |         |      |
| TIM:         |           | 1.5159        | nmole/L   |         |      |
| Total Conc.: |           | 0.4850        | ng/uL     |         |      |

Smear Analysis      200 bp to 1200 bp      0.4555 ng/uL      93.9 %Total      1.5279 nmole/L      491 Avg. Size (b.p.)      36.52 %CV

Sample Peak Width (sec): 50      Sample Min Peak Height: 25      Sample Baseline V to V?: Y      Sample Baseline V to V pts: 3  
 Sample Filter: Binomial      # of Pts for Filter: 3      Sample Start Region (min): 0      Sample End Region (min): 50  
 Manual Baseline Start (min): 10      Manual Baseline End (min): 48  
 Marker Peak Width (sec): 5      Marker Min Peak Height: 200      Marker Baseline V to V?: Y      Marker Baseline V to V pts: 3  
 Lower Marker Selection: First Peak > 200 RFU      Upper Marker Selection: Last Peak > 200 RFU  
 Ladder Size (bp): 1, 100, 200, 300, 400, 500, 600, 700, 800, 900, 1000, 1200, 1500, 2000, 3000, 6000  
 Quantification Using: Ladder      Final Concentration (ng/uL): 0.0830      Dilution Factor: 12.0

Sample: 103613-001-138

Well Location: B12

Created: Friday, June 21, 2019 4:25:48 PM

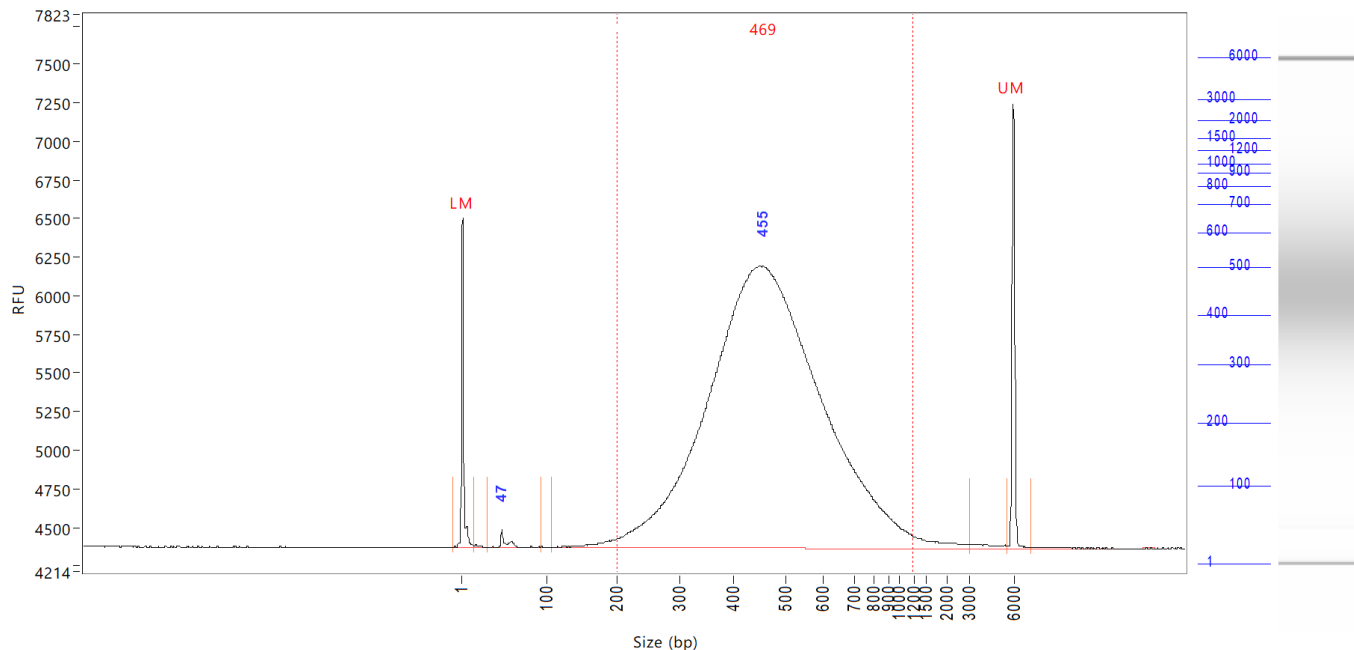

| Peak         | Size (bp) | Conc. (ng/uL) | From (bp) | To (bp) | RFU  |
|--------------|-----------|---------------|-----------|---------|------|
| 1            | 1 (LM)    | 0.0103        | 0         | 15      | 2131 |
| 2            | 47        | 0.0162        | 31        | 94      | 122  |
| 3            | 455       | 3.4042        | 106       | 3001    | 1827 |
| 4            | 6000 (UM) | 0.0081        | 5619      | 7238    | 2883 |
| TIC:         |           | 3.4204        | ng/uL     |         |      |
| TIM:         |           | 12.2271       | nmole/L   |         |      |
| Total Conc.: |           | 3.4326        | ng/uL     |         |      |

Smear Analysis      200 bp to 1200 bp      3.3532 ng/uL      97.7 %Total      11.7588 nmole/L      469 Avg. Size (b.p.)      28.33 %CV

Sample Peak Width (sec): 50      Sample Min Peak Height: 25      Sample Baseline V to V?: Y      Sample Baseline V to V pts: 3  
 Sample Filter: Binomial      # of Pts for Filter: 3      Sample Start Region (min): 0      Sample End Region (min): 50  
 Manual Baseline Start (min): 10      Manual Baseline End (min): 48  
 Marker Peak Width (sec): 5      Marker Min Peak Height: 200      Marker Baseline V to V?: Y      Marker Baseline V to V pts: 3  
 Lower Marker Selection: First Peak > 200 RFU      Upper Marker Selection: Last Peak > 200 RFU  
 Ladder Size (bp): 1, 100, 200, 300, 400, 500, 600, 700, 800, 900, 1000, 1200, 1500, 2000, 3000, 6000  
 Quantification Using: Ladder      Final Concentration (ng/uL): 0.0830      Dilution Factor: 12.0

**Sample:** ladder  
**Well Location:** G6  
**Created:** Friday, June 21, 2019 4:25:48 PM  
**Fit Type:** Point to Point

Calibration Curve

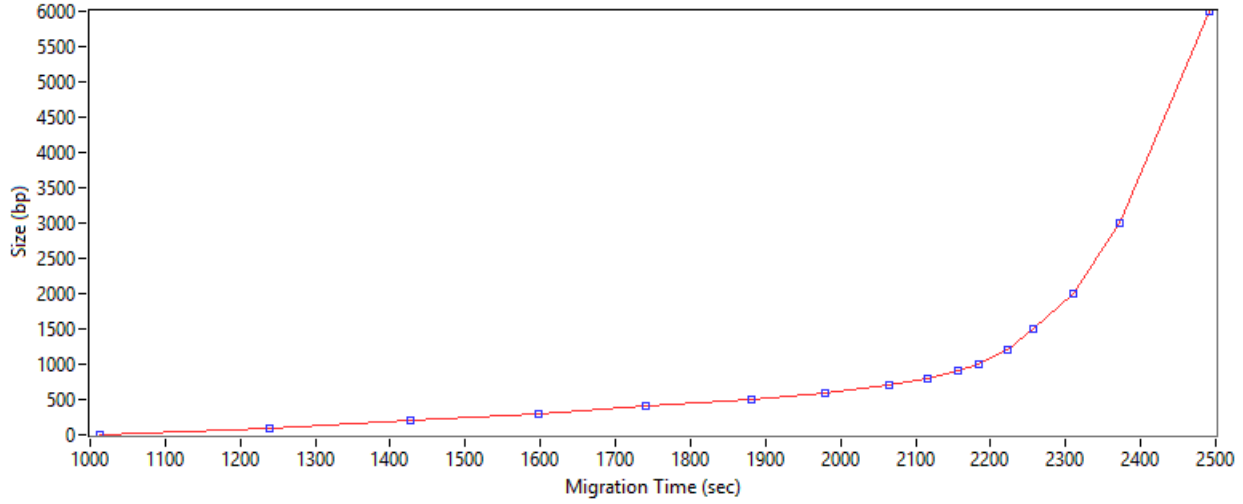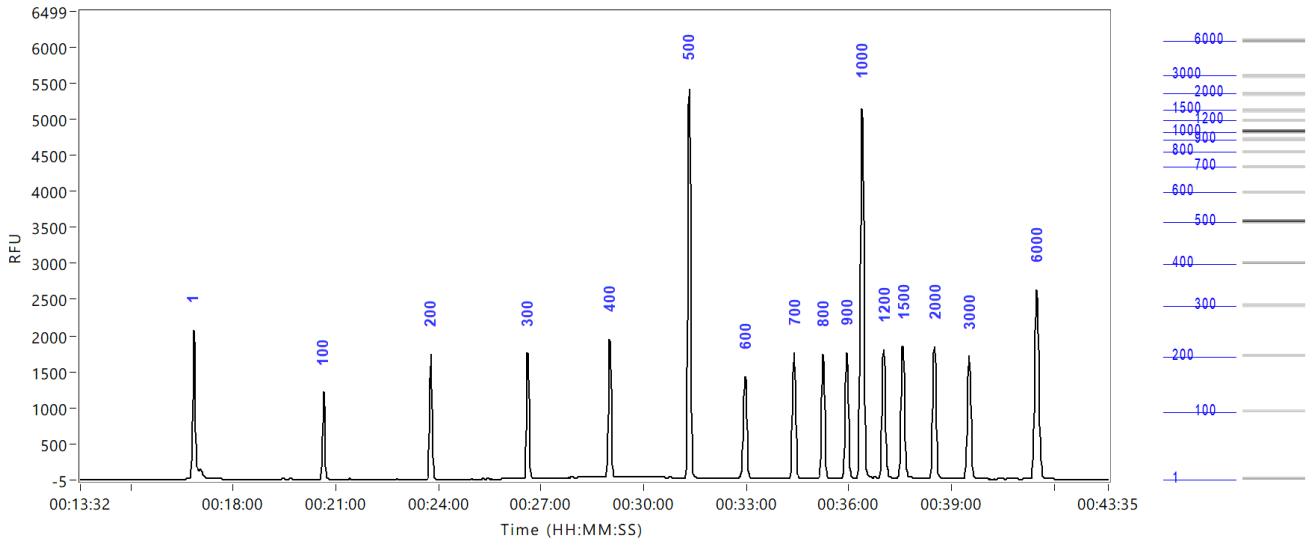

**Fragment Analyzer Run Summary:****Filename and Data Path:** X:\Lopende Opdrachten\GAI\103613\PrepQC\_103613-NGS\_HS 13-42-08\2019\_06\_21

13H\_42M.raw

**Created:** Friday, June 21, 2019 2:11:36 PM**# of Capillaries:** 96**Array Serial #:** 112118-01SFS**Effect Length:** 33 cm**Array Usage Count:** 227**FA Version #:** 1.2.0.11**Device Serial #:** 3003**METHOD INFORMATION****Method Name:** DNF-474-33 - HS NGS Fragment 1-6000bp.mthds**Gel Prime:** No**Full Conditioning:** Yes**Gel Prime to Buffer:** No**Gel Selection:** Gel 1**Perform Prerun:** 6.0 kV, 30 sec.**Rinse:** No**Marker 1:** No**Rinse:** Tray: 3, Row: A, # Dips: 1**Sample Injection:** 5.0 kV, 30 sec.**Separation:** 6.0 kV, 50.0 min.**Tray Name:** PrepQC\_103613-NGS\_HS**Analysis Mode:** NGS**NOTES**

# Gel Image

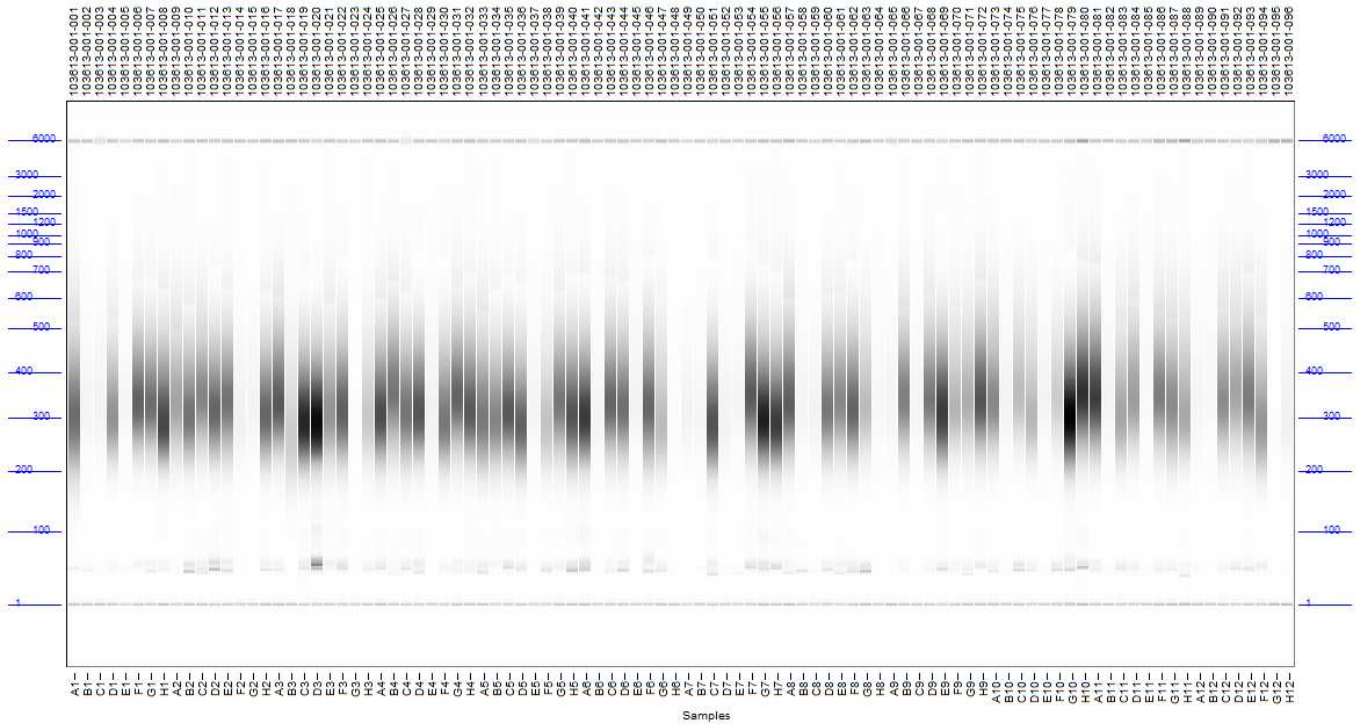

Filename and Data Path: X:\Lopende Opdrachten\GAI\103613\PrepQC\_103613-NGS\_HS 13-42-08\2019 06 21 13H 42M.raw

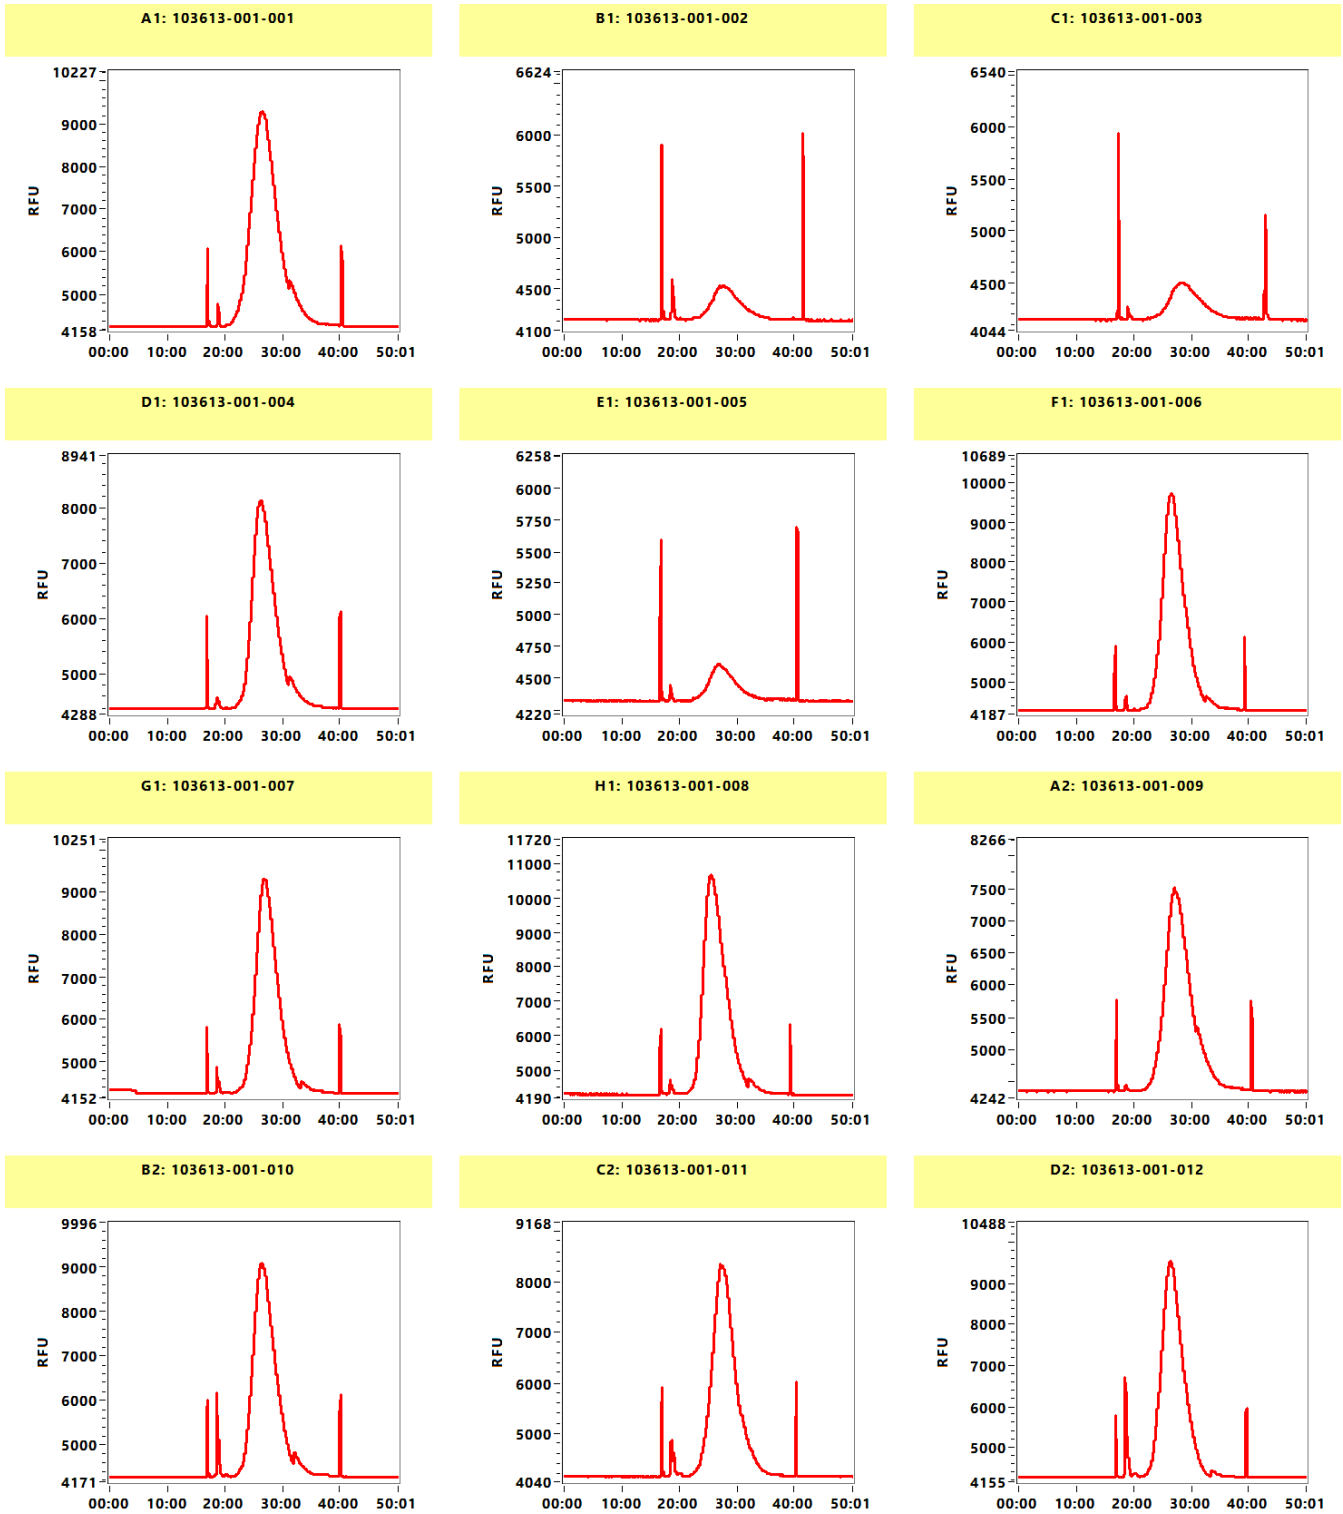

Filename and Data Path: X:\Lopende Opdrachten\GAI\103613\PrepQC\_103613-NGS\_HS 13-42-08\2019 06 21 13H 42M.raw

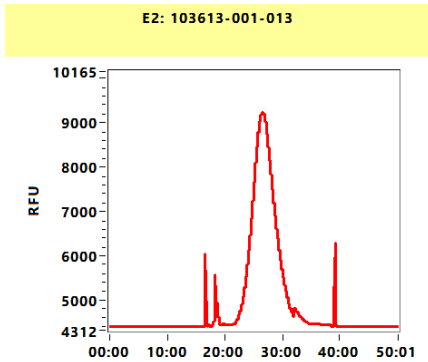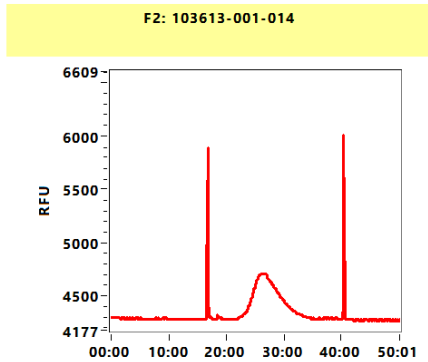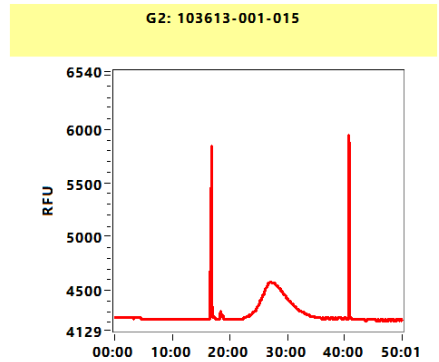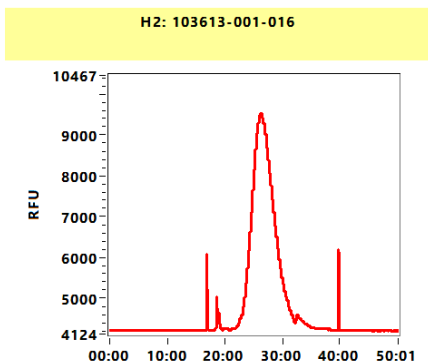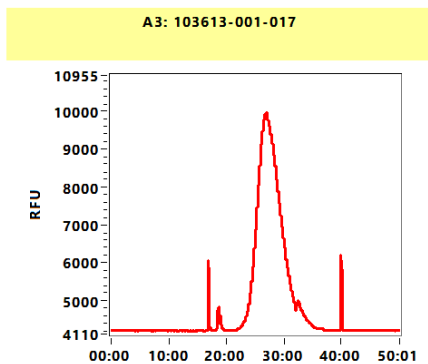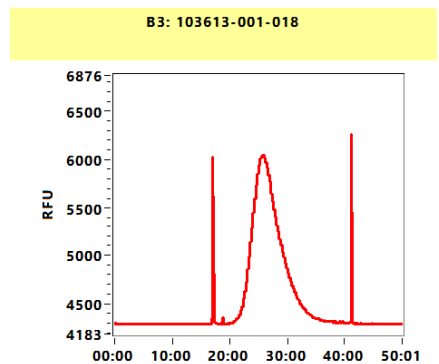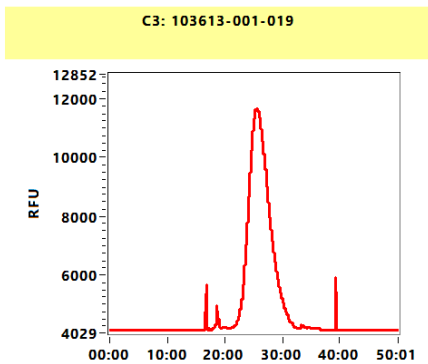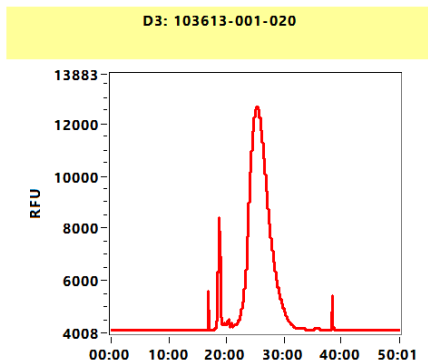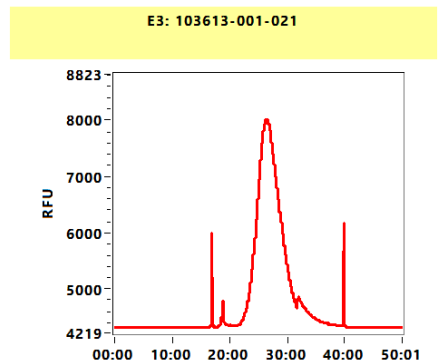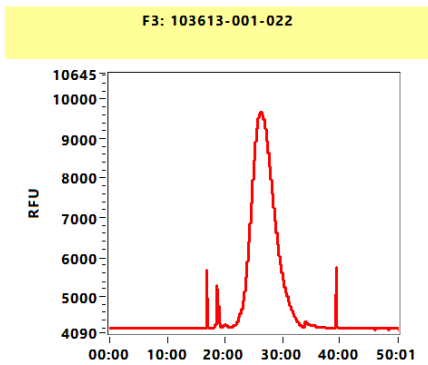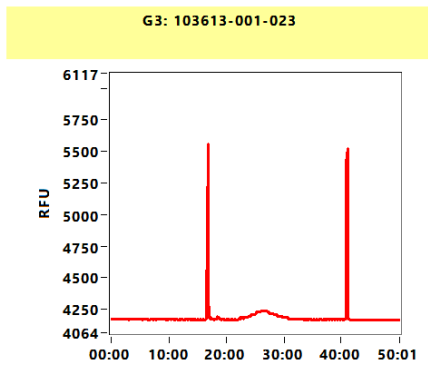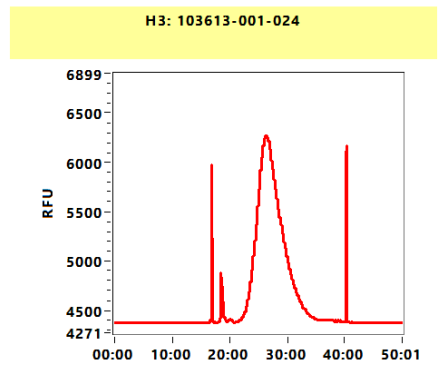

Filename and Data Path: X:\Lopende Opdrachten\GAI\103613\PrepQC\_103613-NGS\_HS 13-42-08\2019 06 21 13H 42M.raw

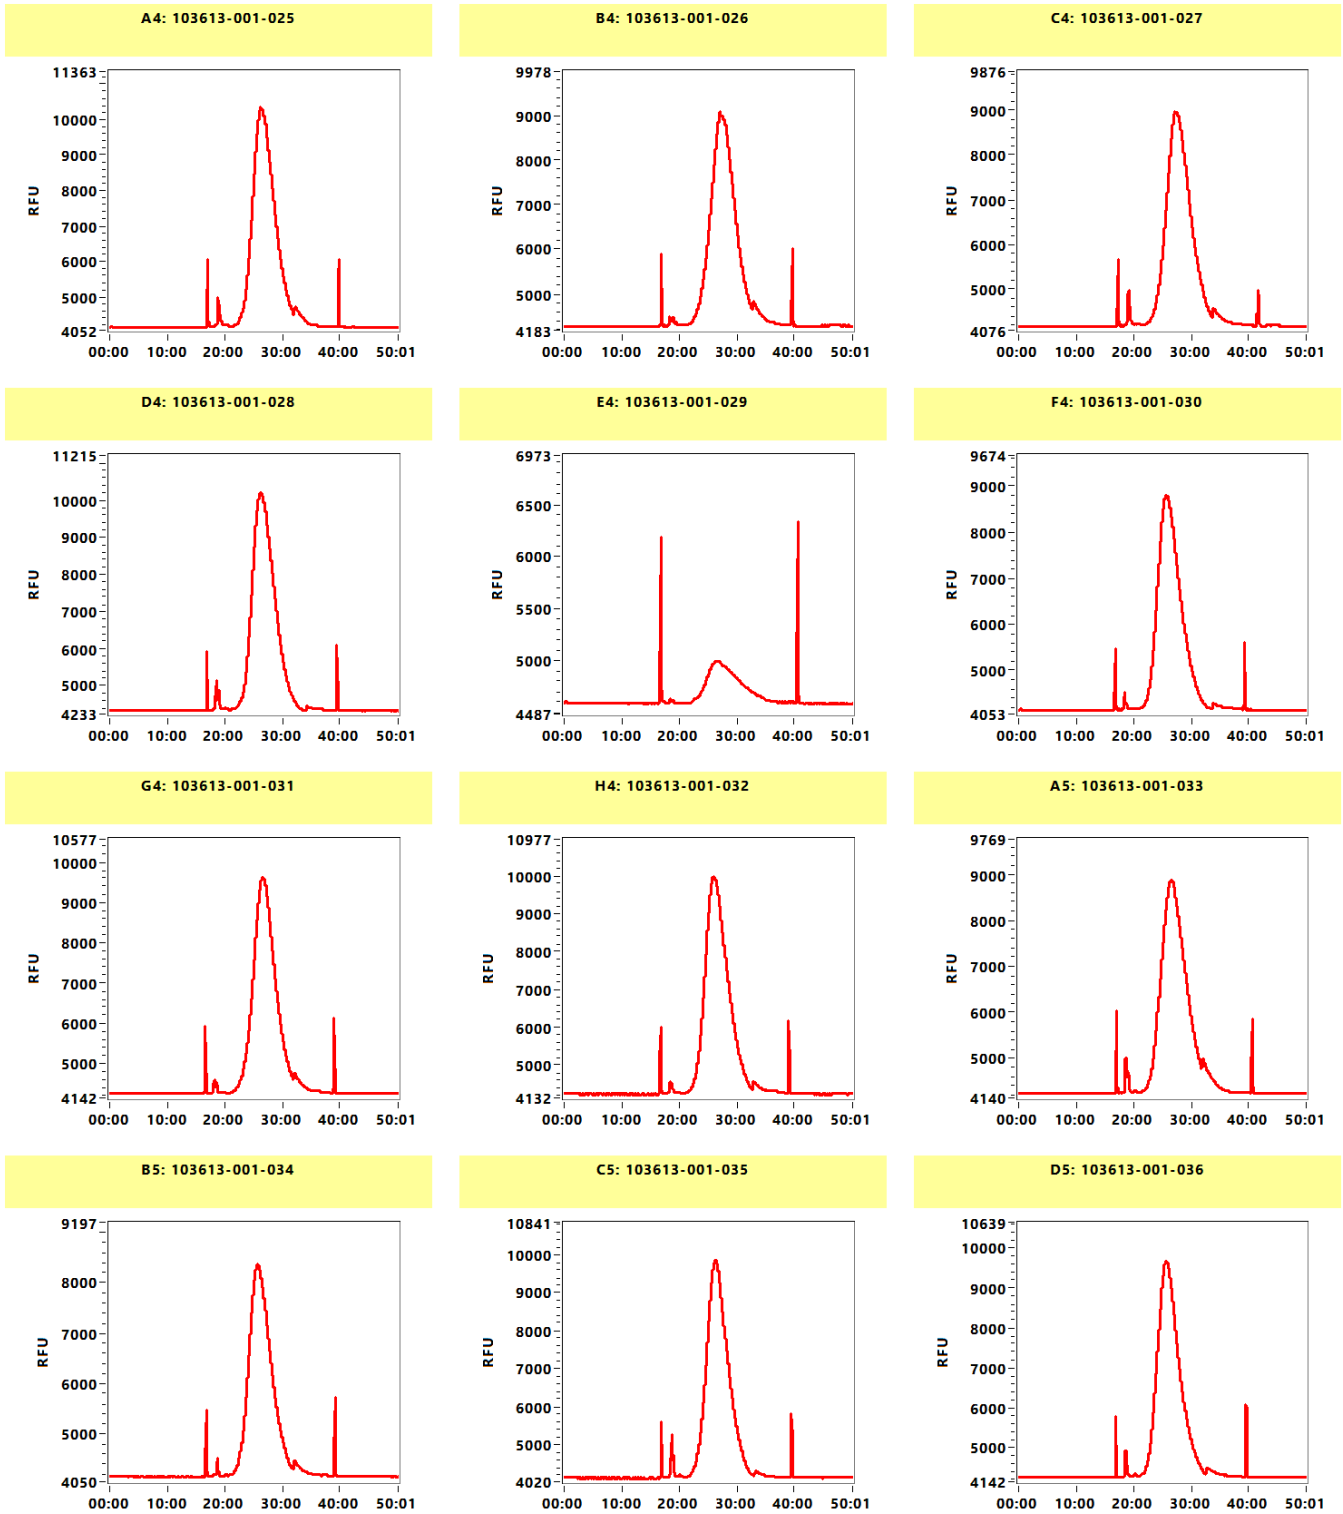



Filename and Data Path: X:\Lopende Opdrachten\GAI\103613\PrepQC\_103613-NGS\_HS 13-42-08\2019 06 21 13H 42M.raw

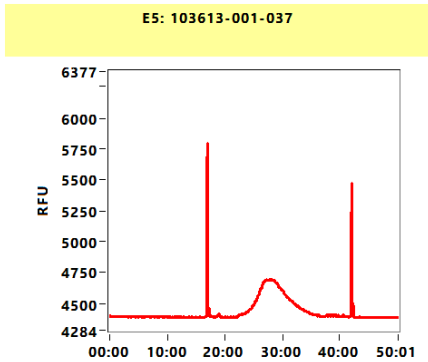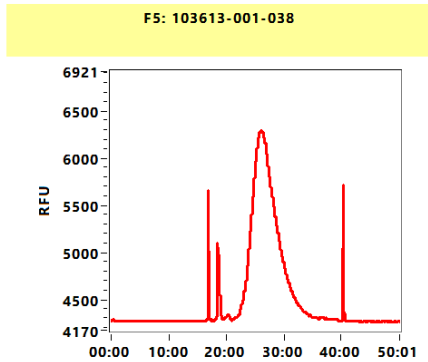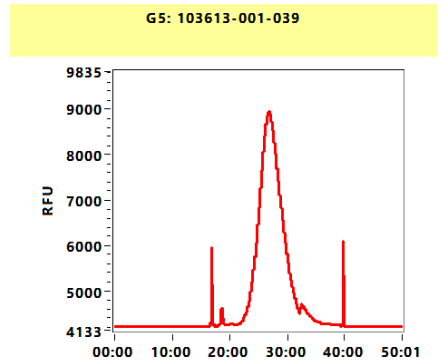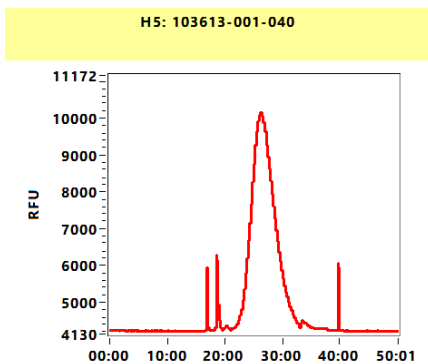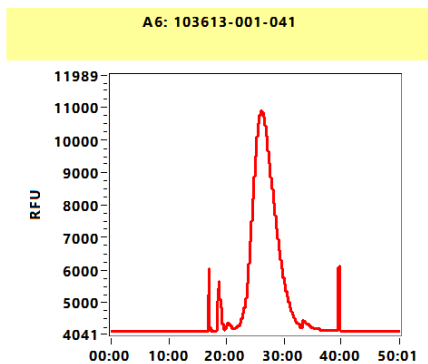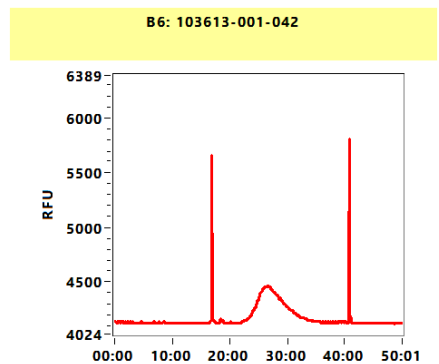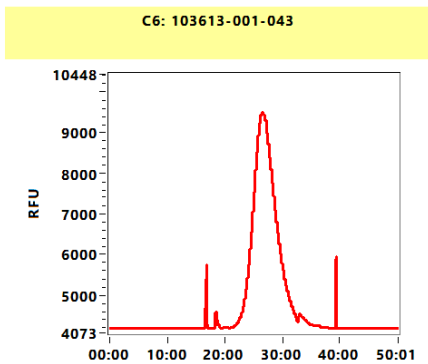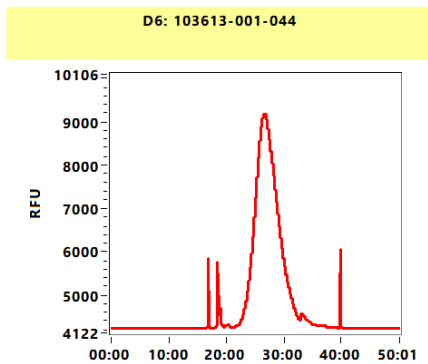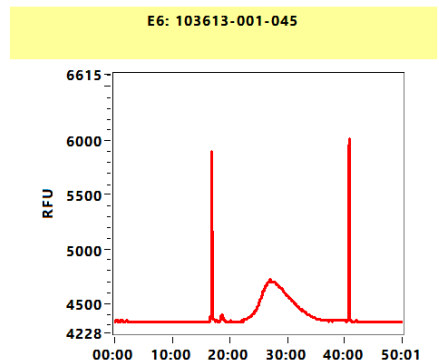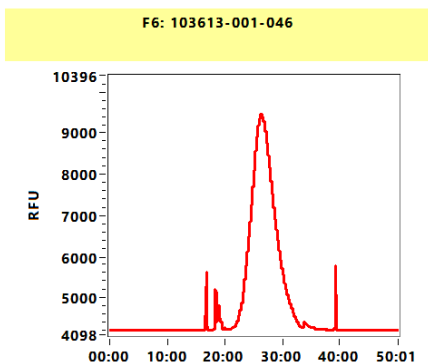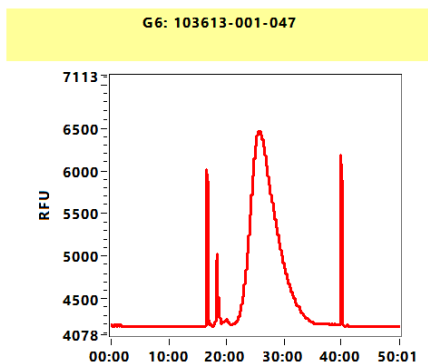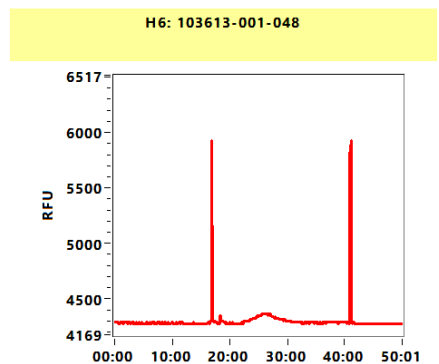

Filename and Data Path: X:\Lopende Opdrachten\GAI\103613\PrepQC\_103613-NGS\_HS 13-42-08\2019 06 21 13H 42M.raw

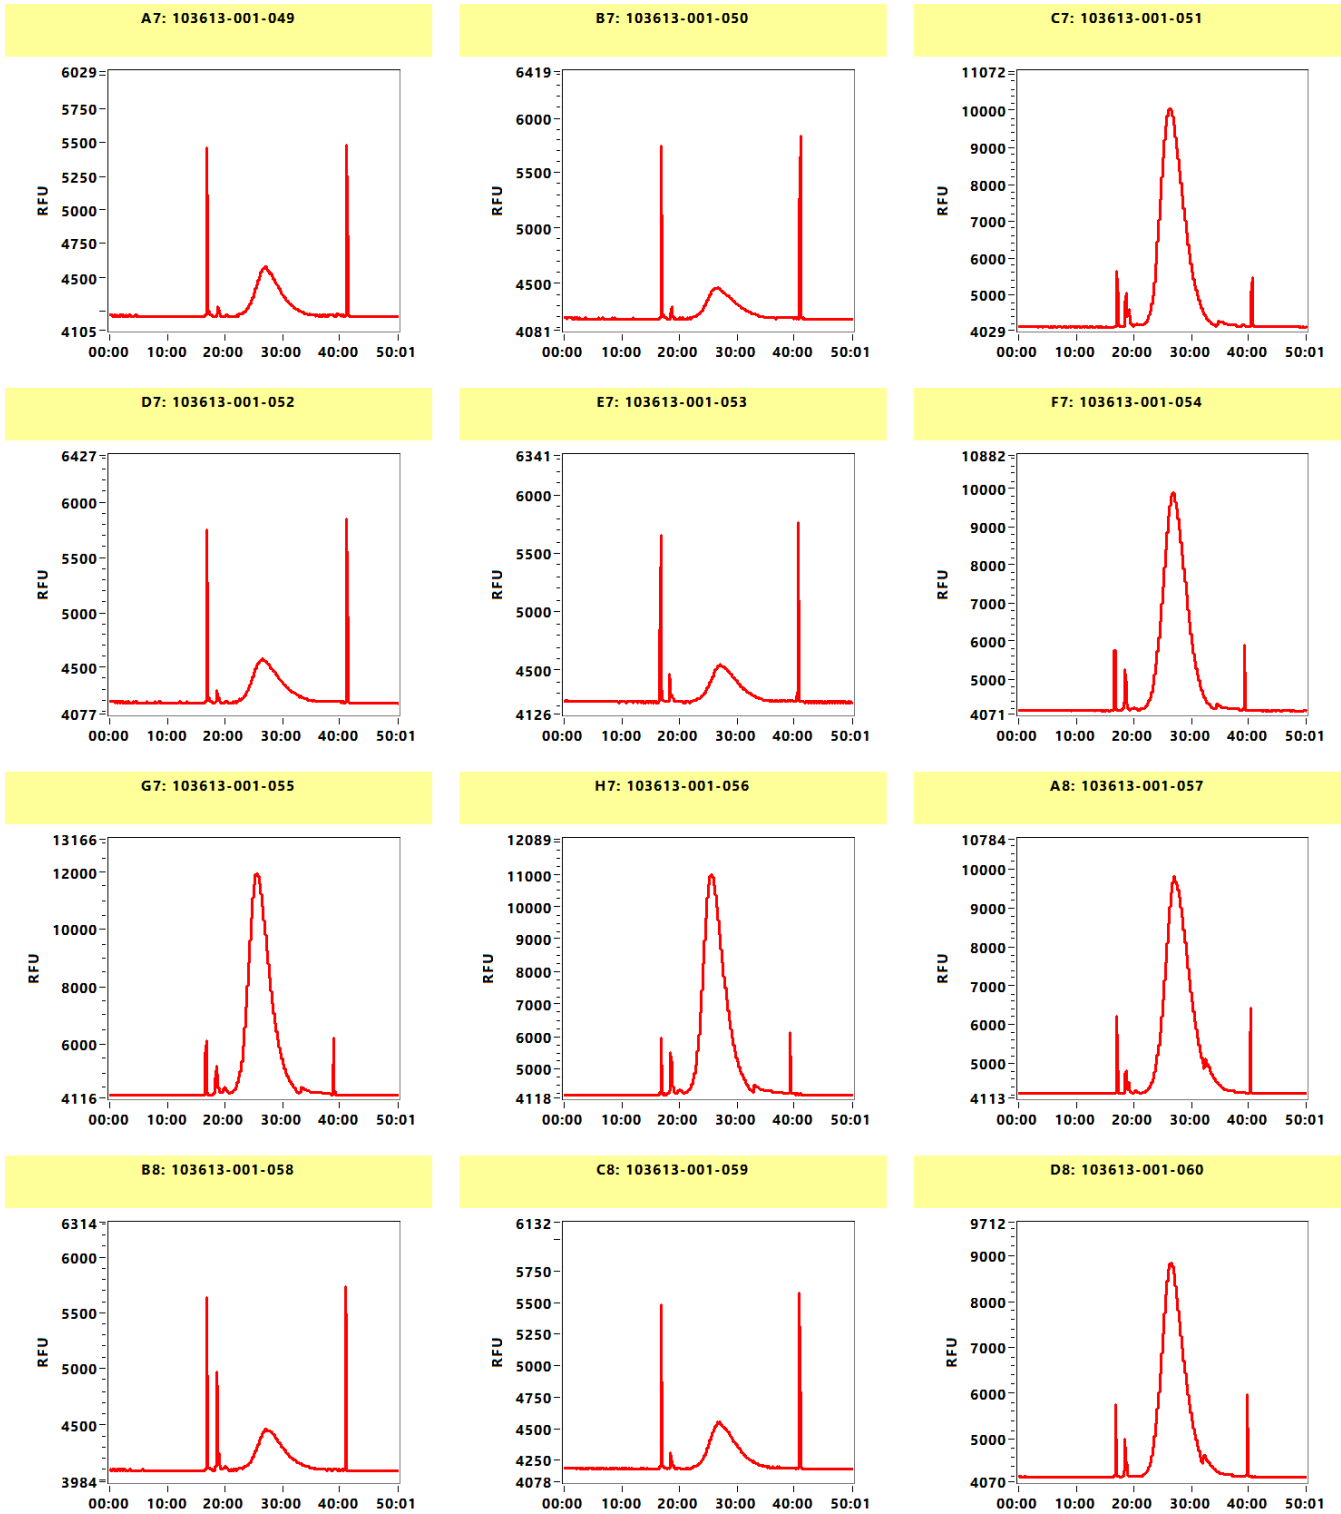

Filename and Data Path: X:\Lopende Opdrachten\GAI\103613\PrepQC\_103613-NGS\_HS 13-42-08\2019 06 21 13H 42M.raw

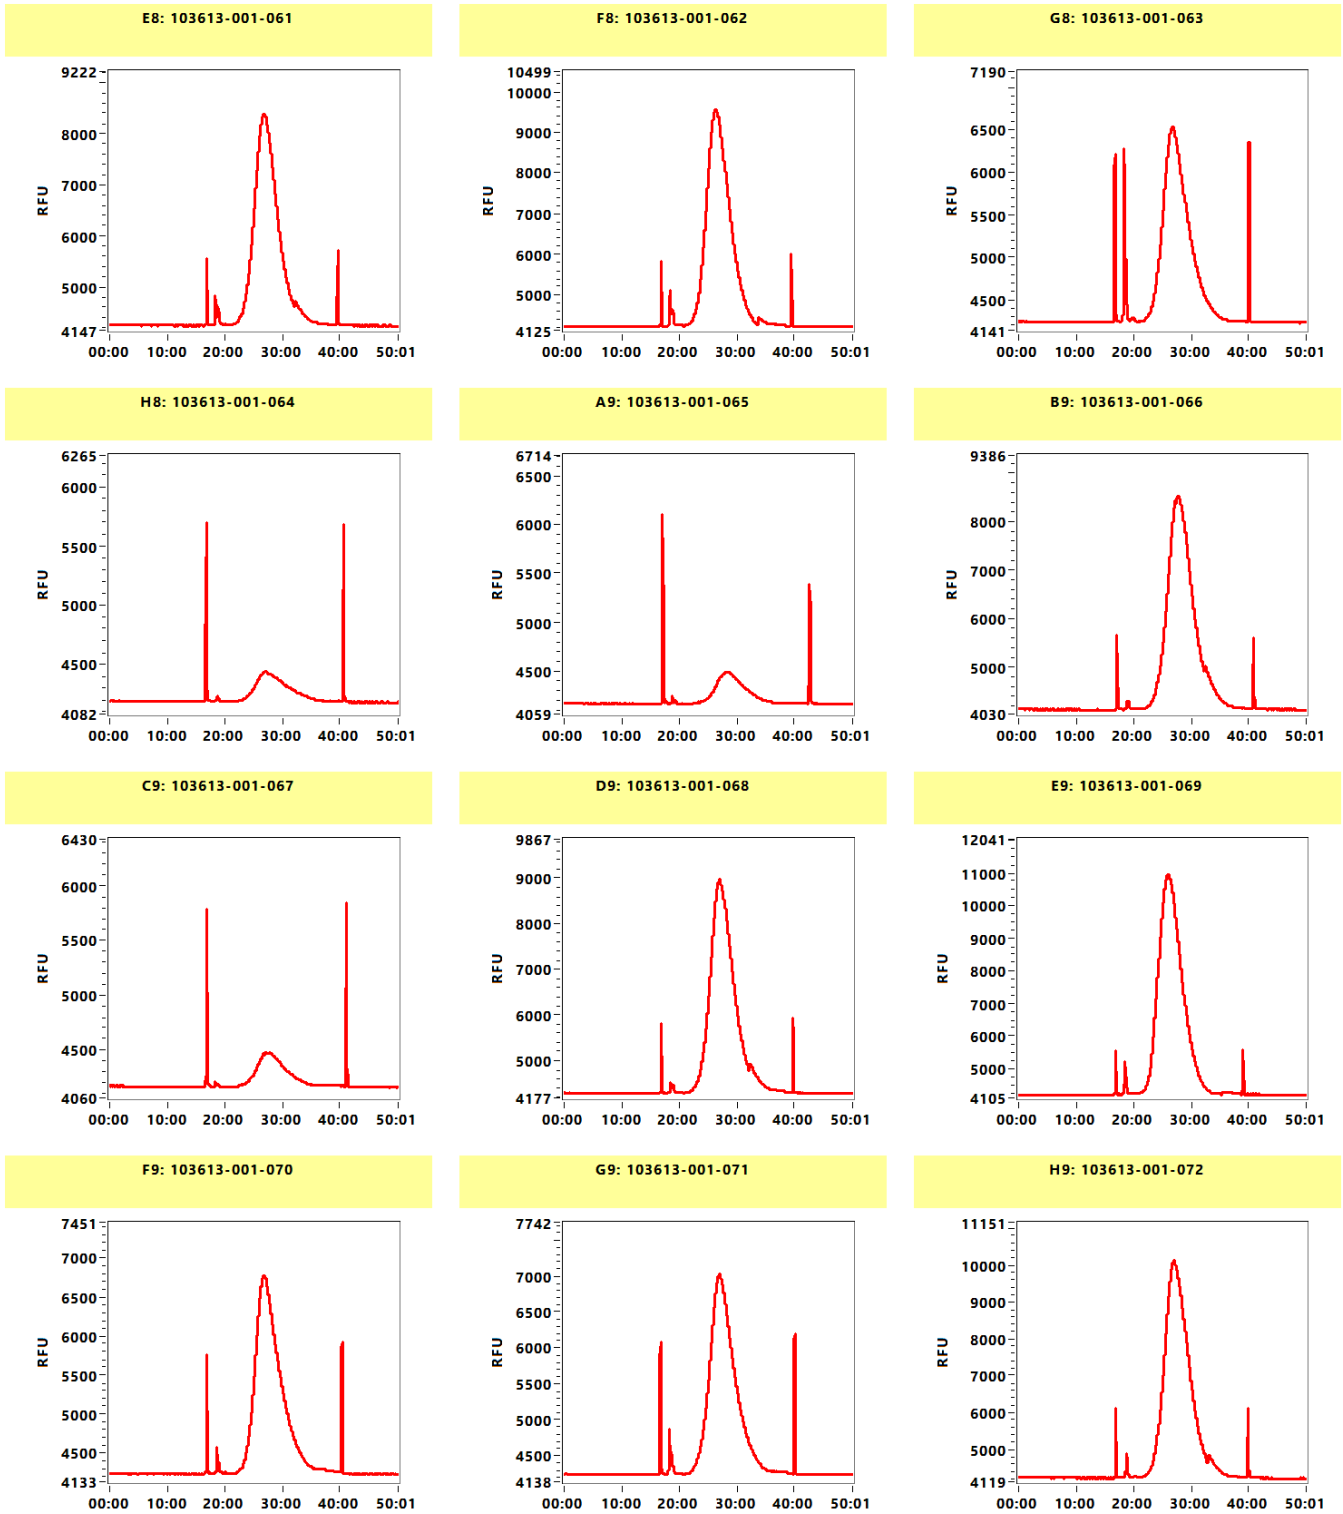

Filename and Data Path: X:\Lopende Opdrachten\GAI\103613\PrepQC\_103613-NGS\_HS 13-42-08\2019 06 21 13H 42M.raw

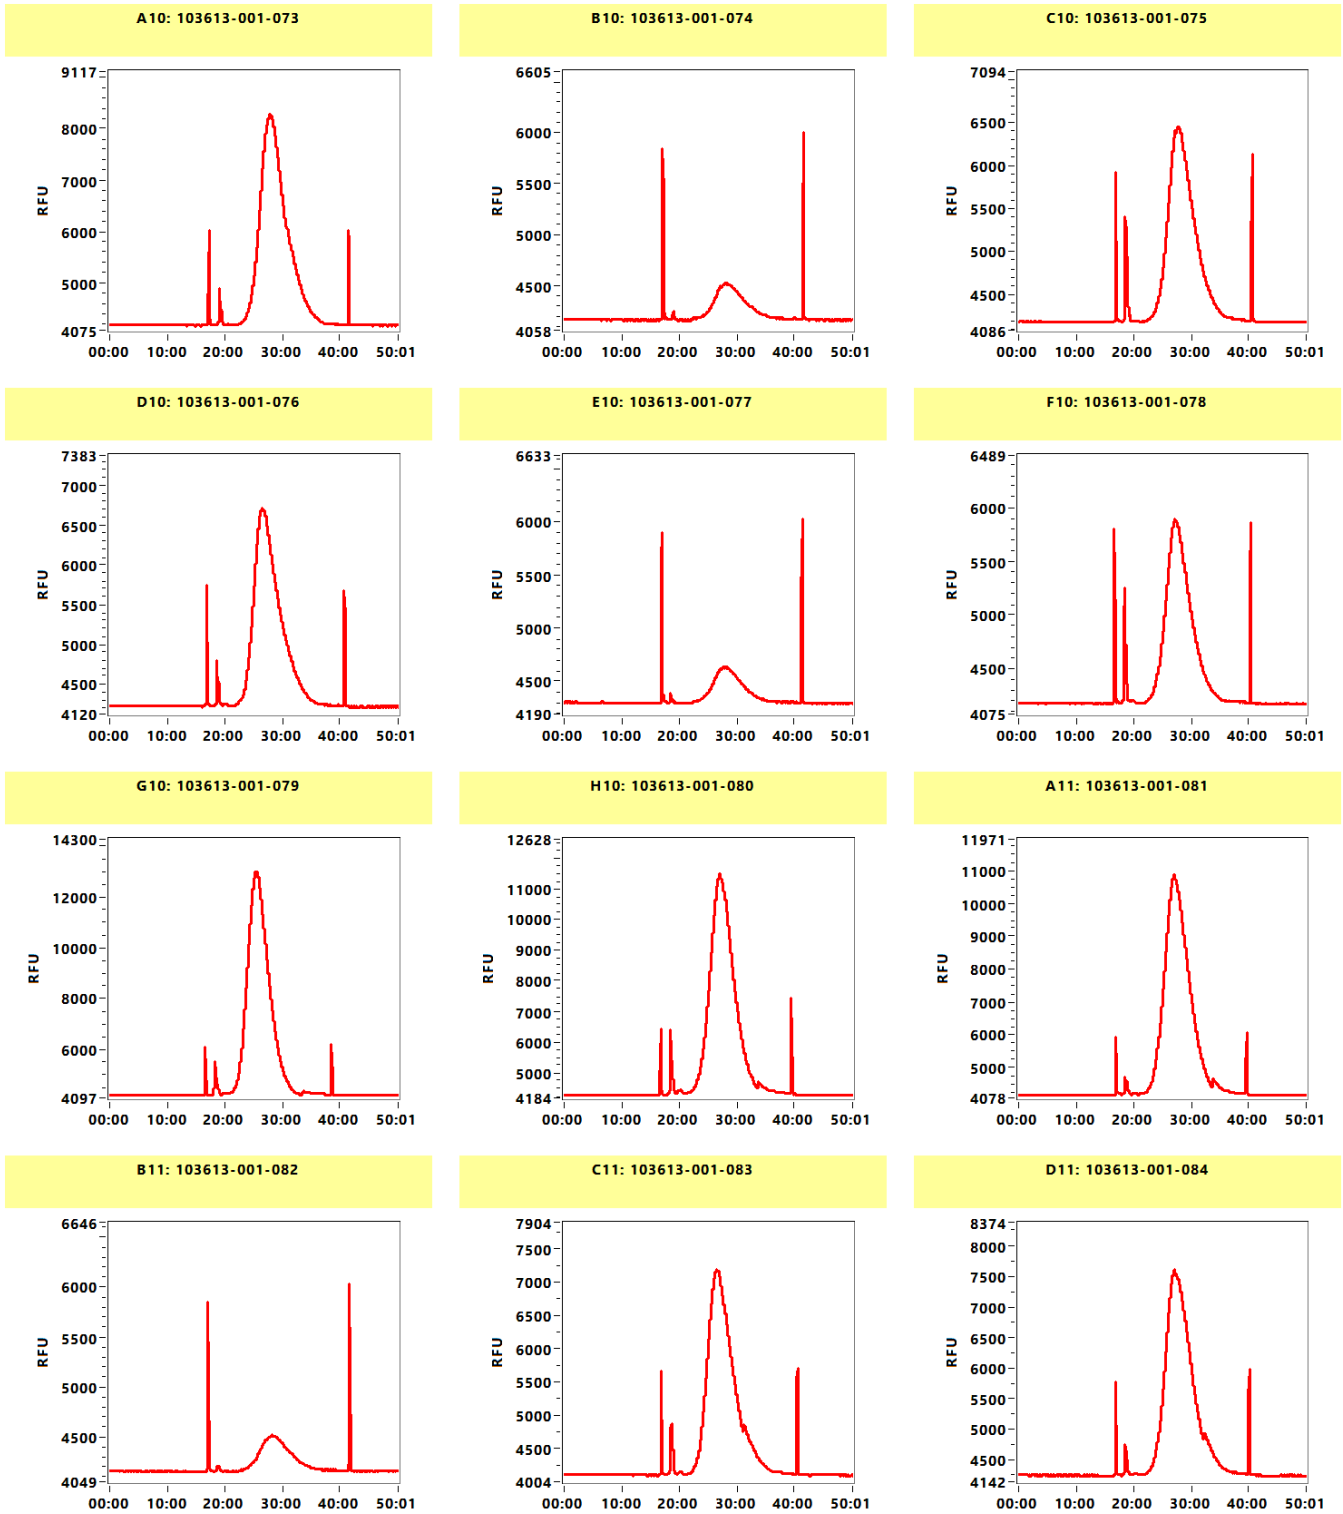

Filename and Data Path: X:\Lopende Opdrachten\GAI\103613\PrepQC\_103613-NGS\_HS 13-42-08\2019 06 21 13H 42M.raw

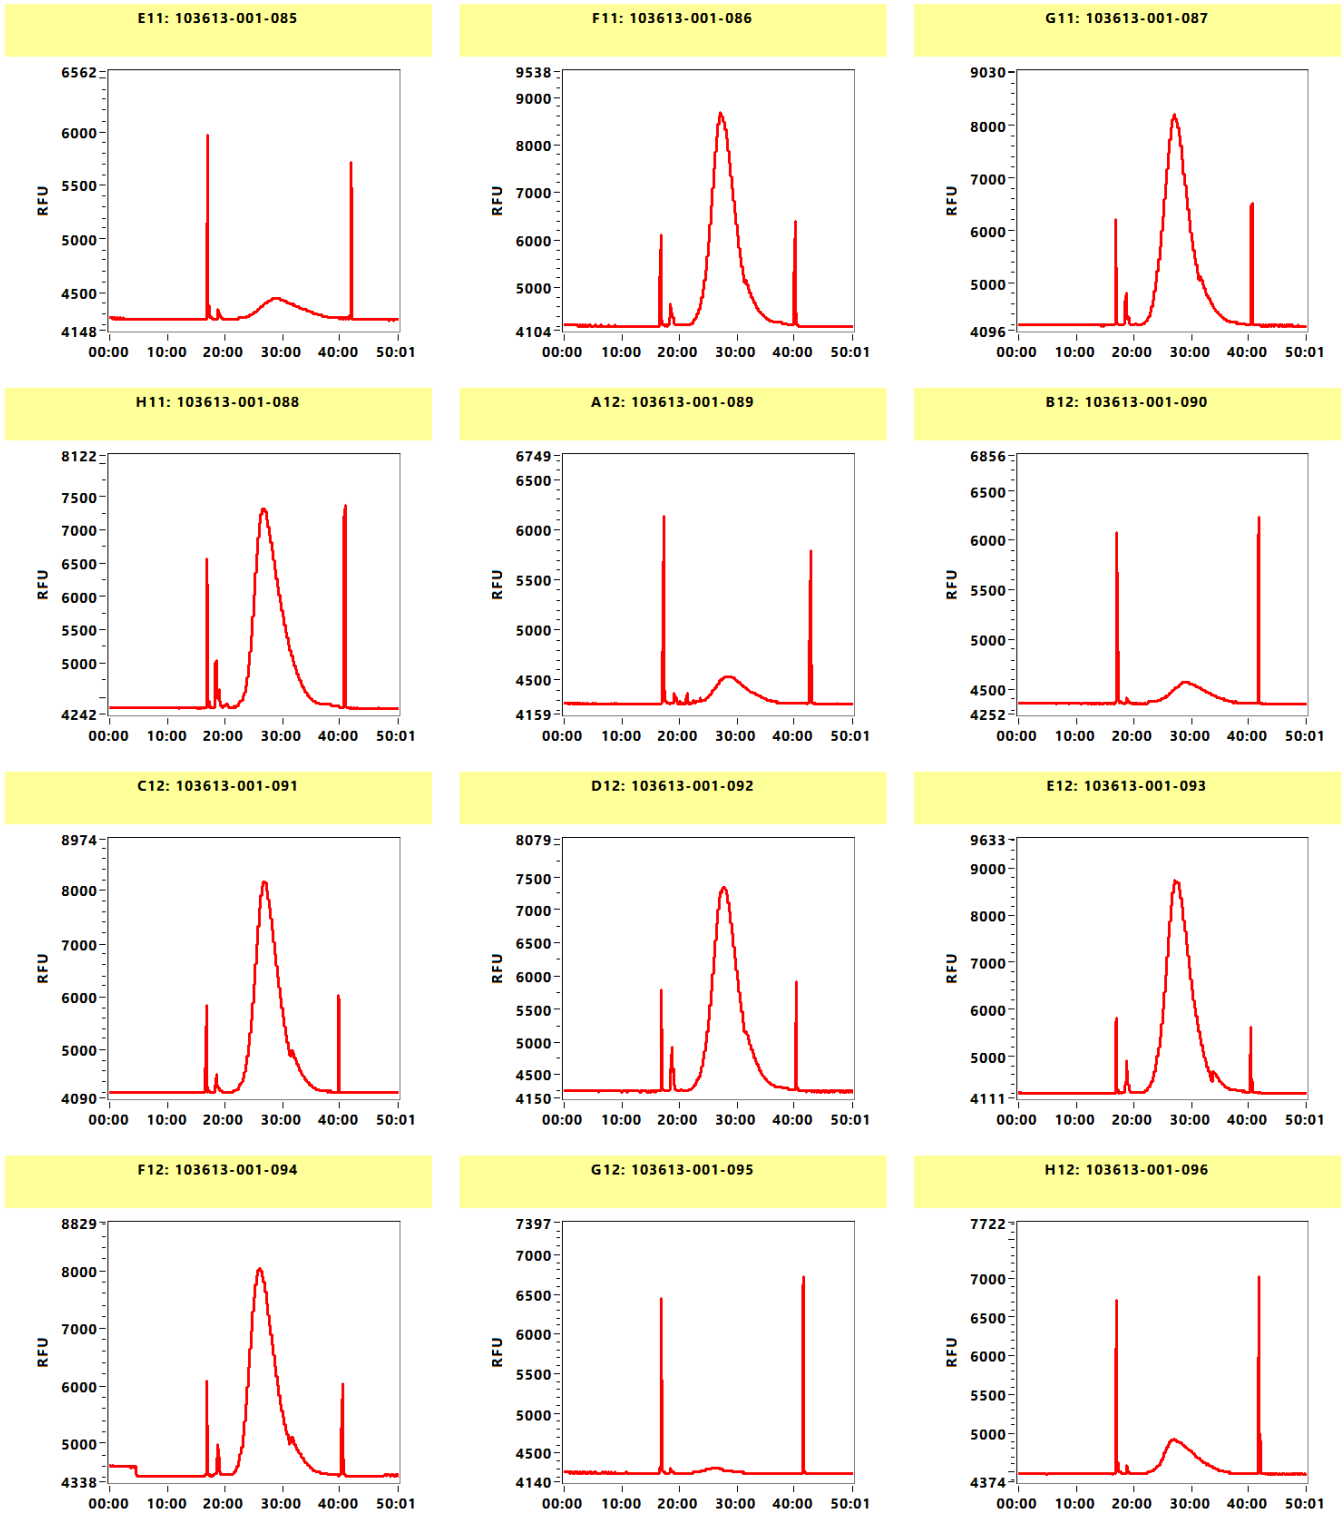

Sample: 103613-001-001

Well Location: A1

Created: Friday, June 21, 2019 2:11:36 PM

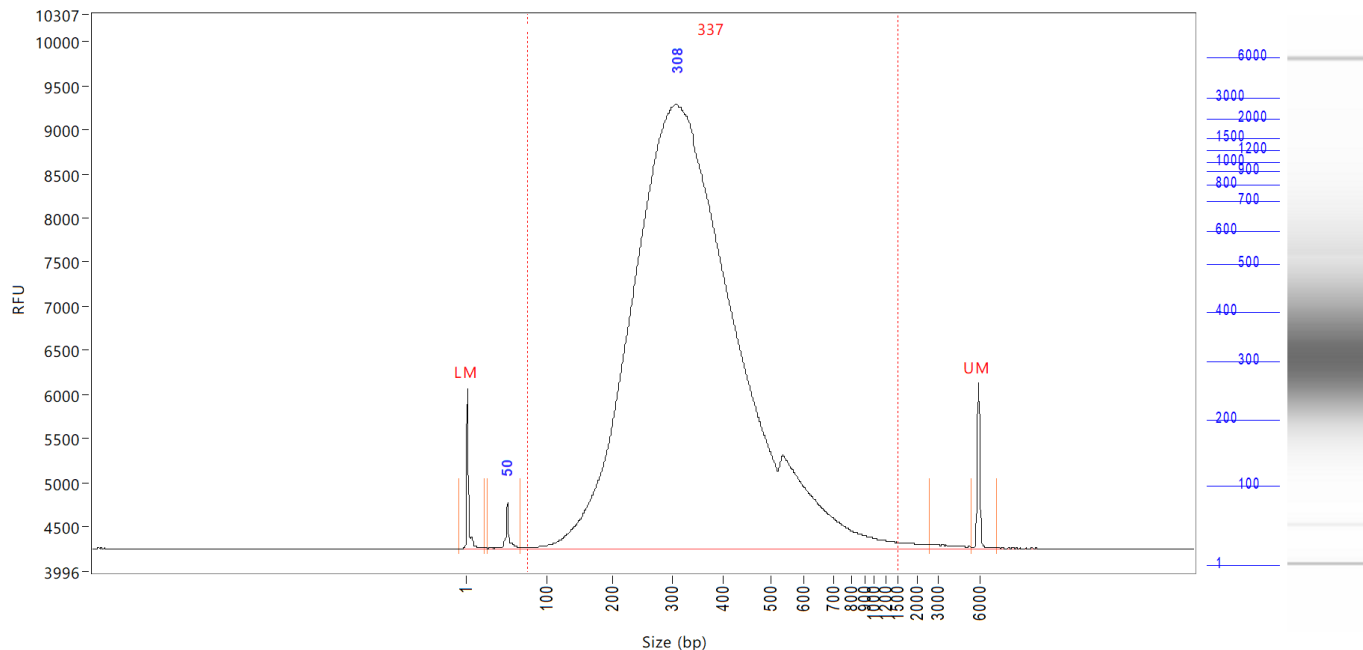

| Peak         | Size (bp) | Conc. (ng/uL) | From (bp) | To (bp) | RFU  |
|--------------|-----------|---------------|-----------|---------|------|
| 1            | 1 (LM)    | 0.0124        | 0         | 23      | 1807 |
| 2            | 50        | 0.0664        | 26        | 68      | 527  |
| 3            | 308       | 13.5857       | 68        | 2600    | 5046 |
| 4            | 6000 (UM) | 0.0077        | 5492      | 7364    | 1890 |
| TIC:         |           | 13.6522       | ng/uL     |         |      |
| TIM:         |           | 67.7187       | nmole/L   |         |      |
| Total Conc.: |           | 13.6763       | ng/uL     |         |      |

Smear Analysis      75 bp to 1500 bp      13.5515 ng/ul      99.1 %Total      66.1277 nmole/L      337 Avg. Size (b.p.)      35.67 %CV

Sample Peak Width (sec): 50      Sample Min Peak Height: 25      Sample Baseline V to V?: Y      Sample Baseline V to V pts: 3  
 Sample Filter: Binomial      # of Pts for Filter: 3      Sample Start Region (min): 0      Sample End Region (min): 50  
 Manual Baseline Start (min): 10      Manual Baseline End (min): 48  
 Marker Peak Width (sec): 5      Marker Min Peak Height: 200      Marker Baseline V to V?: Y      Marker Baseline V to V pts: 3  
 Lower Marker Selection: First Peak > 200 RFU      Upper Marker Selection: Last Peak > 200 RFU  
 Ladder Size (bp): 1, 100, 200, 300, 400, 500, 600, 700, 800, 900, 1000, 1200, 1500, 2000, 3000, 6000  
 Quantification Using: Ladder      Final Concentration (ng/uL): 0.0830      Dilution Factor: 12.0

Sample: 103613-001-002

Well Location: B1

Created: Friday, June 21, 2019 2:11:36 PM

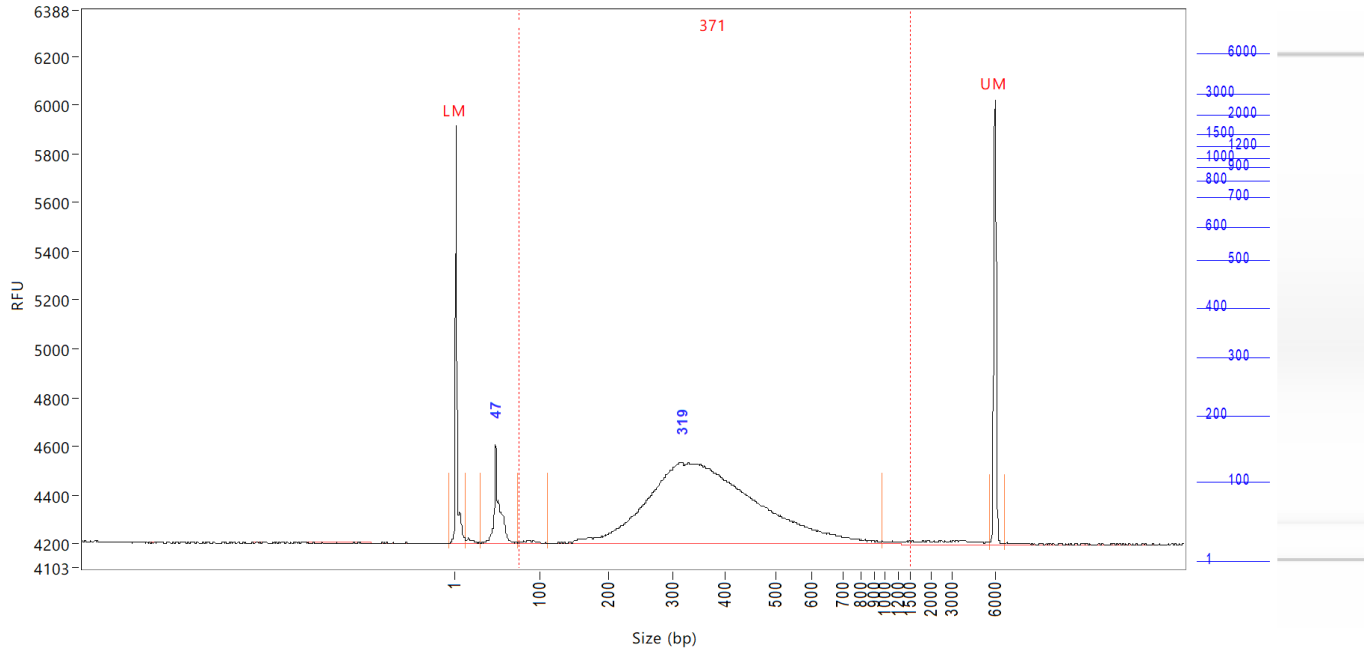

| Peak | Size (bp) | Conc. (ng/uL) | From (bp) | To (bp) | RFU  |
|------|-----------|---------------|-----------|---------|------|
| 1    | 1 (LM)    | 0.0124        | 0         | 14      | 1708 |
| 2    | 47        | 0.0795        | 30        | 75      | 402  |
| 3    | 319       | 0.9662        | 111       | 980     | 334  |
| 4    | 6000 (UM) | 0.0075        | 5644      | 6657    | 1825 |

TIC: 1.0457 ng/uL  
 TIM: 6.9234 nmole/L  
 Total Conc.: 1.0744 ng/uL

Smear Analysis      75 bp to 1500 bp      0.9757 ng/uL      90.8 %Total      4.3278 nmole/L      371 Avg. Size (b.p.)      34.54 %CV

Sample Peak Width (sec): 50      Sample Min Peak Height: 25      Sample Baseline V to V?: Y      Sample Baseline V to V pts: 3  
 Sample Filter: Binomial      # of Pts for Filter: 3      Sample Start Region (min): 0      Sample End Region (min): 50  
 Manual Baseline Start (min): 10      Manual Baseline End (min): 48  
 Marker Peak Width (sec): 5      Marker Min Peak Height: 200      Marker Baseline V to V?: Y      Marker Baseline V to V pts: 3  
 Lower Marker Selection: First Peak > 200 RFU      Upper Marker Selection: Last Peak > 200 RFU  
 Ladder Size (bp): 1, 100, 200, 300, 400, 500, 600, 700, 800, 900, 1000, 1200, 1500, 2000, 3000, 6000  
 Quantification Using: Ladder      Final Concentration (ng/uL): 0.0830      Dilution Factor: 12.0

Sample: 103613-001-003

Well Location: C1

Created: Friday, June 21, 2019 2:11:36 PM

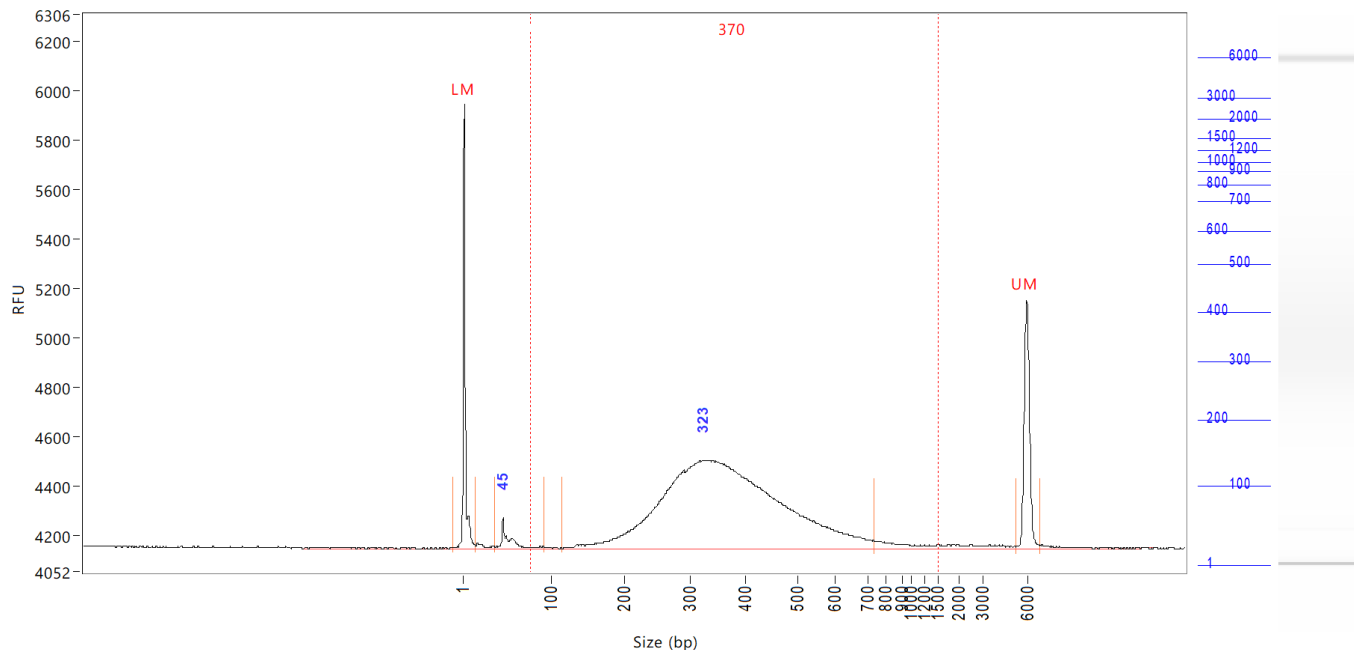

| Peak         | Size (bp) | Conc. (ng/uL) | From (bp) | To (bp) | RFU  |
|--------------|-----------|---------------|-----------|---------|------|
| 1            | 1 (LM)    | 0.0124        | 0         | 14      | 1800 |
| 2            | 45        | 0.0277        | 36        | 92      | 127  |
| 3            | 323       | 1.0273        | 114       | 736     | 356  |
| 4            | 6000 (UM) | 0.0074        | 5263      | 6834    | 1004 |
| TIC:         |           | 1.0550        | ng/uL     |         |      |
| TIM:         |           | 5.5245        | nmole/L   |         |      |
| Total Conc.: |           | 1.0930        | ng/uL     |         |      |

Smear Analysis      75 bp to 1500 bp      1.0475 ng/uL      95.8 %Total      4.6548 nmole/L      370 Avg. Size (b.p.)      35.45 %CV

Sample Peak Width (sec): 50      Sample Min Peak Height: 25      Sample Baseline V to V?: Y      Sample Baseline V to V pts: 3  
 Sample Filter: Binomial      # of Pts for Filter: 3      Sample Start Region (min): 0      Sample End Region (min): 50  
 Manual Baseline Start (min): 10      Manual Baseline End (min): 48  
 Marker Peak Width (sec): 5      Marker Min Peak Height: 200      Marker Baseline V to V?: Y      Marker Baseline V to V pts: 3  
 Lower Marker Selection: First Peak > 200 RFU      Upper Marker Selection: Last Peak > 200 RFU  
 Ladder Size (bp): 1, 100, 200, 300, 400, 500, 600, 700, 800, 900, 1000, 1200, 1500, 2000, 3000, 6000  
 Quantification Using: Ladder      Final Concentration (ng/uL): 0.0830      Dilution Factor: 12.0



Sample: 103613-001-004

Well Location: D1

Created: Friday, June 21, 2019 2:11:36 PM

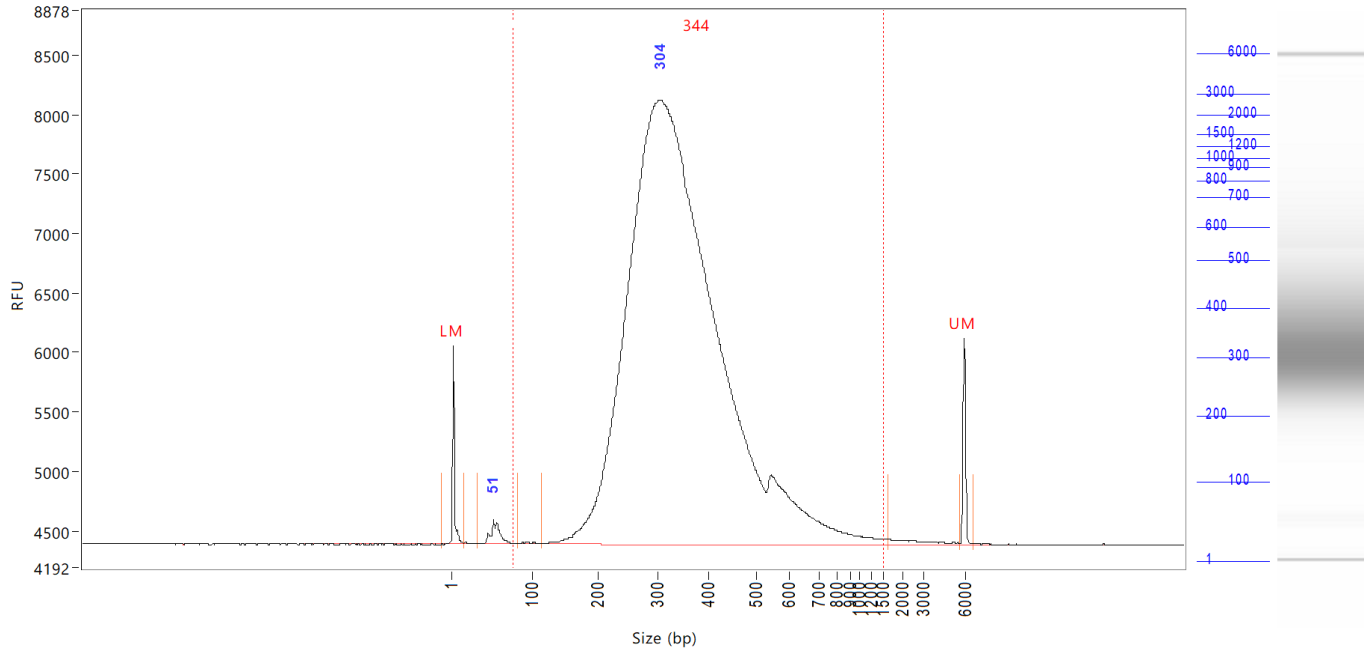

| Peak | Size (bp) | Conc. (ng/uL) | From (bp) | To (bp) | RFU  |
|------|-----------|---------------|-----------|---------|------|
| 1    | 1 (LM)    | 0.0124        | 0         | 15      | 1663 |
| 2    | 51        | 0.0777        | 33        | 82      | 203  |
| 3    | 304       | 9.6877        | 114       | 1635    | 3741 |
| 4    | 6000 (UM) | 0.0077        | 5670      | 6682    | 1736 |

TIC: 9.7655 ng/uL  
 TIM: 48.5540 nmole/L  
 Total Conc.: 9.8104 ng/uL

Smear Analysis 75 bp to 1500 bp 9.6936 ng/uL 98.8 %Total 46.3589 nmole/L 344 Avg. Size (b.p.) 31.93 %CV

Sample Peak Width (sec): 50 Sample Min Peak Height: 25 Sample Baseline V to V?: Y Sample Baseline V to V pts: 3  
 Sample Filter: Binomial # of Pts for Filter: 3 Sample Start Region (min): 0 Sample End Region (min): 50  
 Manual Baseline Start (min): 10 Manual Baseline End (min): 48  
 Marker Peak Width (sec): 5 Marker Min Peak Height: 200 Marker Baseline V to V?: Y Marker Baseline V to V pts: 3  
 Lower Marker Selection: First Peak > 200 RFU Upper Marker Selection: Last Peak > 200 RFU  
 Ladder Size (bp): 1, 100, 200, 300, 400, 500, 600, 700, 800, 900, 1000, 1200, 1500, 2000, 3000, 6000  
 Quantification Using: Ladder Final Concentration (ng/uL): 0.0830 Dilution Factor: 12.0

Sample: 103613-001-005

Well Location: E1

Created: Friday, June 21, 2019 2:11:36 PM

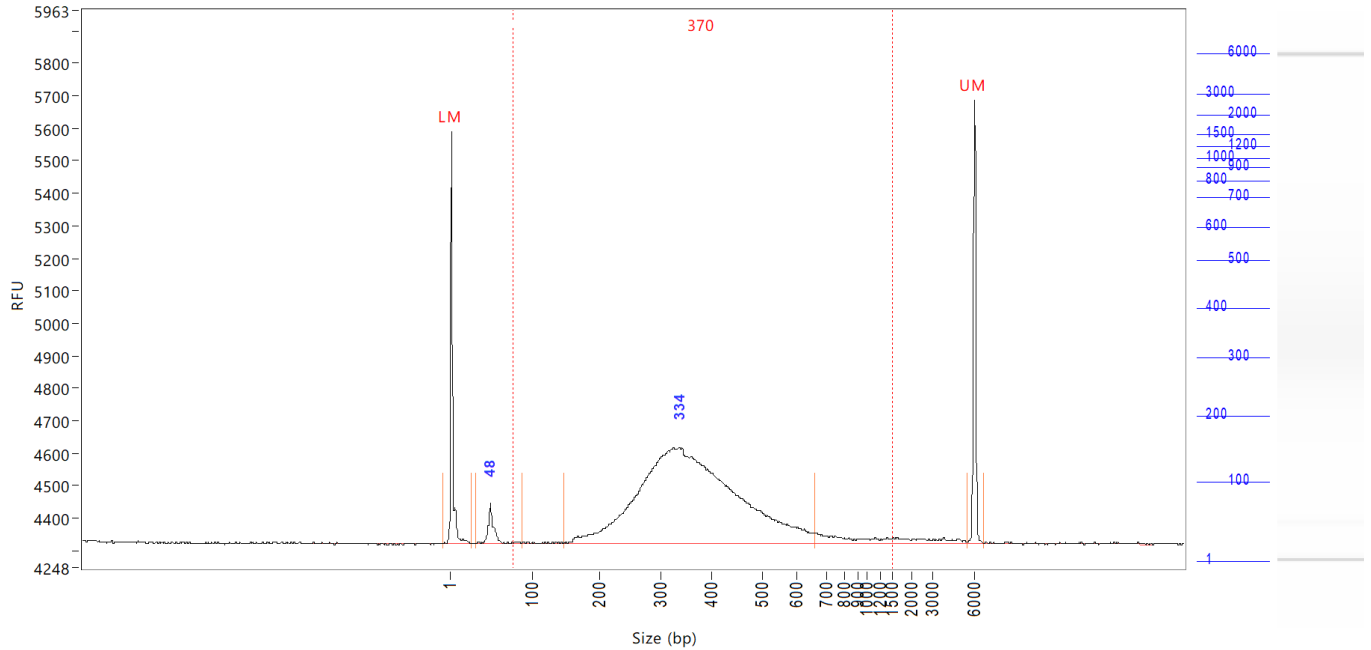

| Peak | Size (bp) | Conc. (ng/uL) | From (bp) | To (bp) | RFU  |
|------|-----------|---------------|-----------|---------|------|
| 1    | 1 (LM)    | 0.0124        | 0         | 27      | 1266 |
| 2    | 48        | 0.0352        | 31        | 87      | 124  |
| 3    | 334       | 1.0304        | 147       | 664     | 295  |
| 4    | 6000 (UM) | 0.0075        | 5517      | 6682    | 1366 |

TIC: 1.0656 ng/uL  
 TIM: 5.8932 nmole/L  
 Total Conc.: 1.1185 ng/uL

Smear Analysis      75 bp to 1500 bp      1.0655 ng/uL      95.3 %Total      4.7430 nmole/L      370 Avg. Size (b.p.)      36.29 %CV

Sample Peak Width (sec): 50      Sample Min Peak Height: 25      Sample Baseline V to V?: Y      Sample Baseline V to V pts: 3  
 Sample Filter: Binomial      # of Pts for Filter: 3      Sample Start Region (min): 0      Sample End Region (min): 50  
 Manual Baseline Start (min): 10      Manual Baseline End (min): 48  
 Marker Peak Width (sec): 5      Marker Min Peak Height: 200      Marker Baseline V to V?: Y      Marker Baseline V to V pts: 3  
 Lower Marker Selection: First Peak > 200 RFU      Upper Marker Selection: Last Peak > 200 RFU  
 Ladder Size (bp): 1, 100, 200, 300, 400, 500, 600, 700, 800, 900, 1000, 1200, 1500, 2000, 3000, 6000  
 Quantification Using: Ladder      Final Concentration (ng/uL): 0.0830      Dilution Factor: 12.0

Sample: 103613-001-006

Well Location: F1

Created: Friday, June 21, 2019 2:11:36 PM

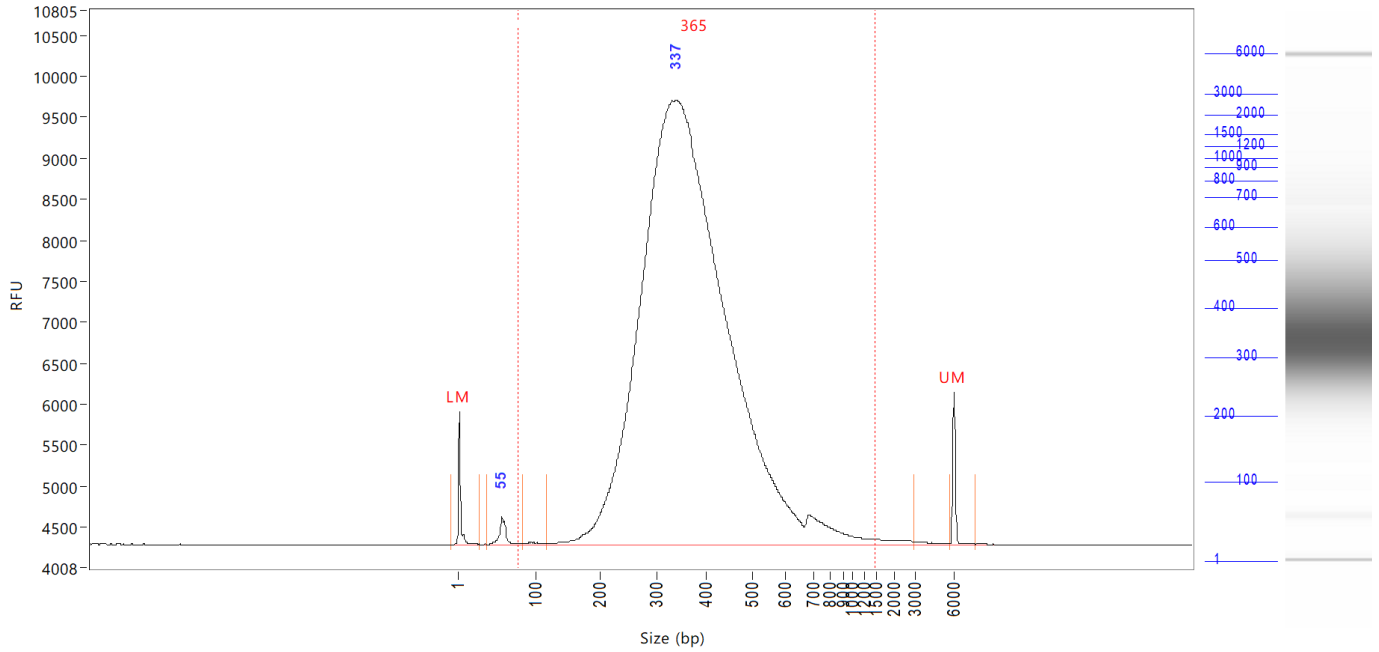

| Peak | Size (bp) | Conc. (ng/uL) | From (bp) | To (bp) | RFU  |
|------|-----------|---------------|-----------|---------|------|
| 1    | 1 (LM)    | 0.0124        | 0         | 27      | 1619 |
| 2    | 55        | 0.0878        | 36        | 82      | 349  |
| 3    | 337       | 13.4305       | 116       | 2950    | 5431 |
| 4    | 6000 (UM) | 0.0084        | 5695      | 7617    | 1862 |

TIC: 13.5183 ng/uL  
 TIM: 62.2877 nmole/L  
 Total Conc.: 13.5492 ng/uL

Smear Analysis      75 bp to 1500 bp      13.4092 ng/uL      99.0 %Total      60.4428 nmole/L      365 Avg. Size (b.p.)      29.52 %CV

Sample Peak Width (sec): 50      Sample Min Peak Height: 25      Sample Baseline V to V?: Y      Sample Baseline V to V pts: 3  
 Sample Filter: Binomial      # of Pts for Filter: 3      Sample Start Region (min): 0      Sample End Region (min): 50  
 Manual Baseline Start (min): 10      Manual Baseline End (min): 48  
 Marker Peak Width (sec): 5      Marker Min Peak Height: 200      Marker Baseline V to V?: Y      Marker Baseline V to V pts: 3  
 Lower Marker Selection: First Peak > 200 RFU      Upper Marker Selection: Last Peak > 200 RFU  
 Ladder Size (bp): 1, 100, 200, 300, 400, 500, 600, 700, 800, 900, 1000, 1200, 1500, 2000, 3000, 6000  
 Quantification Using: Ladder      Final Concentration (ng/uL): 0.0830      Dilution Factor: 12.0

Sample: 103613-001-007

Well Location: G1

Created: Friday, June 21, 2019 2:11:36 PM

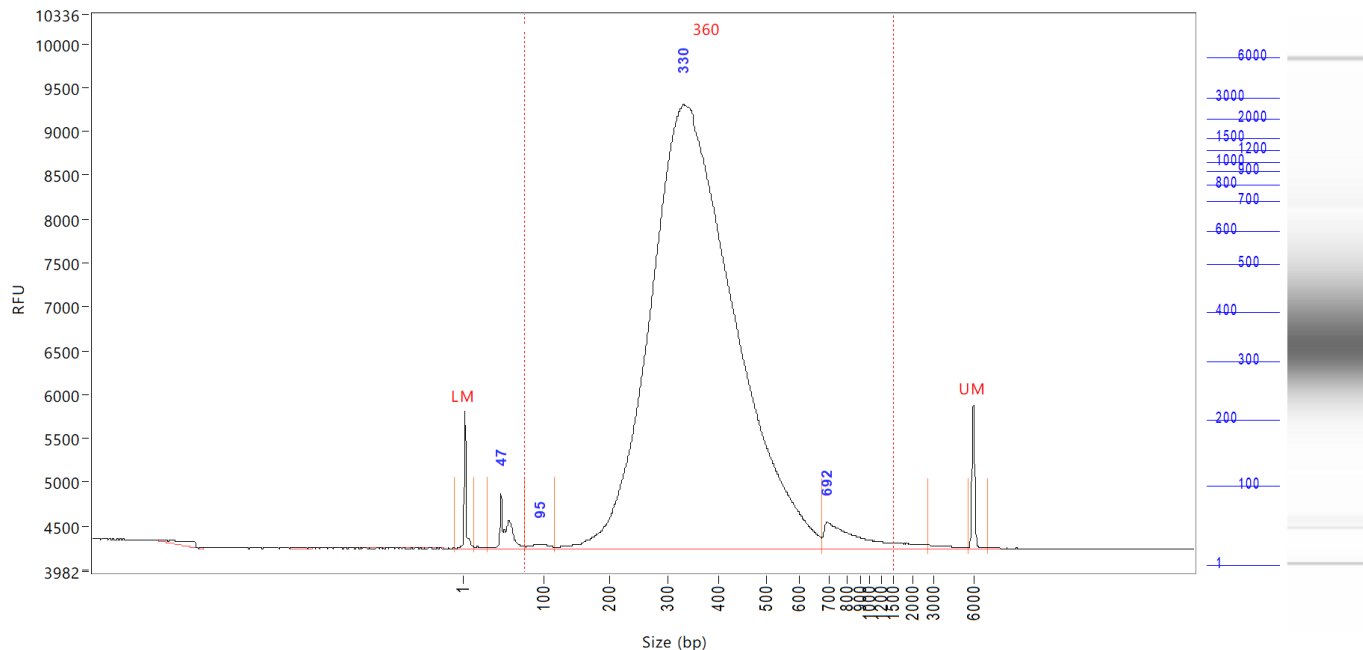

| Peak | Size (bp) | Conc. (ng/uL) | From (bp) | To (bp) | RFU  |
|------|-----------|---------------|-----------|---------|------|
| 1    | 1 (LM)    | 0.0124        | 0         | 15      | 1562 |
| 2    | 47        | 0.1757        | 31        | 77      | 632  |
| 3    | 95        | 0.0332        | 77        | 117     | 48   |
| 4    | 330       | 12.6916       | 117       | 675     | 5075 |
| 5    | 692       | 0.2537        | 675       | 2750    | 301  |
| 6    | 6000 (UM) | 0.0080        | 5644      | 7036    | 1637 |

TIC: 13.1542 ng/uL  
 TIM: 65.5716 nmole/L  
 Total Conc.: 13.1774 ng/uL

Smear Analysis      75 bp to 1500 bp      12.9436 ng/uL      98.2 %Total      59.0834 nmole/L      360 Avg. Size (b.p.)      29.77 %CV

Sample Peak Width (sec): 50      Sample Min Peak Height: 25      Sample Baseline V to V?: Y      Sample Baseline V to V pts: 3  
 Sample Filter: Binomial      # of Pts for Filter: 3      Sample Start Region (min): 0      Sample End Region (min): 50  
 Manual Baseline Start (min): 10      Manual Baseline End (min): 48  
 Marker Peak Width (sec): 5      Marker Min Peak Height: 200      Marker Baseline V to V?: Y      Marker Baseline V to V pts: 3  
 Lower Marker Selection: First Peak > 200 RFU      Upper Marker Selection: Last Peak > 200 RFU  
 Ladder Size (bp): 1, 100, 200, 300, 400, 500, 600, 700, 800, 900, 1000, 1200, 1500, 2000, 3000, 6000  
 Quantification Using: Ladder      Final Concentration (ng/uL): 0.0830      Dilution Factor: 12.0

Sample: 103613-001-008

Well Location: H1

Created: Friday, June 21, 2019 2:11:36 PM

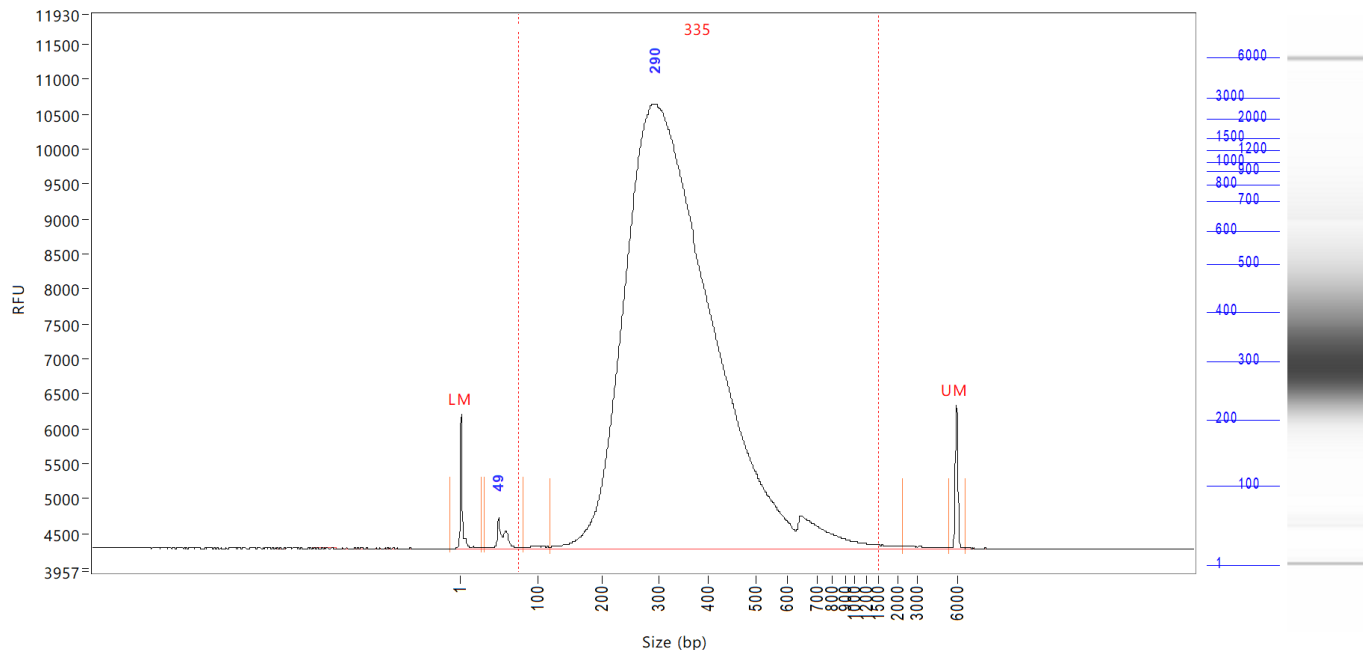

| Peak | Size (bp) | Conc. (ng/uL) | From (bp) | To (bp) | RFU  |
|------|-----------|---------------|-----------|---------|------|
| 1    | 1 (LM)    | 0.0124        | 0         | 28      | 1927 |
| 2    | 49        | 0.1014        | 31        | 82      | 434  |
| 3    | 290       | 13.8701       | 120       | 2267    | 6370 |
| 4    | 6000 (UM) | 0.0077        | 5441      | 6631    | 2060 |

TIC: 13.9715 ng/uL  
 TIM: 70.5297 nmole/L  
 Total Conc.: 14.0071 ng/uL

Smear Analysis      75 bp to 1500 bp      13.8720 ng/ul      99.0 %Total      68.0549 nmole/L      335 Avg. Size (b.p.)      31.54 %CV

Sample Peak Width (sec): 50      Sample Min Peak Height: 25      Sample Baseline V to V?: Y      Sample Baseline V to V pts: 3  
 Sample Filter: Binomial      # of Pts for Filter: 3      Sample Start Region (min): 0      Sample End Region (min): 50  
 Manual Baseline Start (min): 10      Manual Baseline End (min): 48  
 Marker Peak Width (sec): 5      Marker Min Peak Height: 200      Marker Baseline V to V?: Y      Marker Baseline V to V pts: 3  
 Lower Marker Selection: First Peak > 200 RFU      Upper Marker Selection: Last Peak > 200 RFU  
 Ladder Size (bp): 1, 100, 200, 300, 400, 500, 600, 700, 800, 900, 1000, 1200, 1500, 2000, 3000, 6000  
 Quantification Using: Ladder      Final Concentration (ng/uL): 0.0830      Dilution Factor: 12.0

**Sample:** 103613-001-009

**Well Location:** A2

**Created:** Friday, June 21, 2019 2:11:36 PM

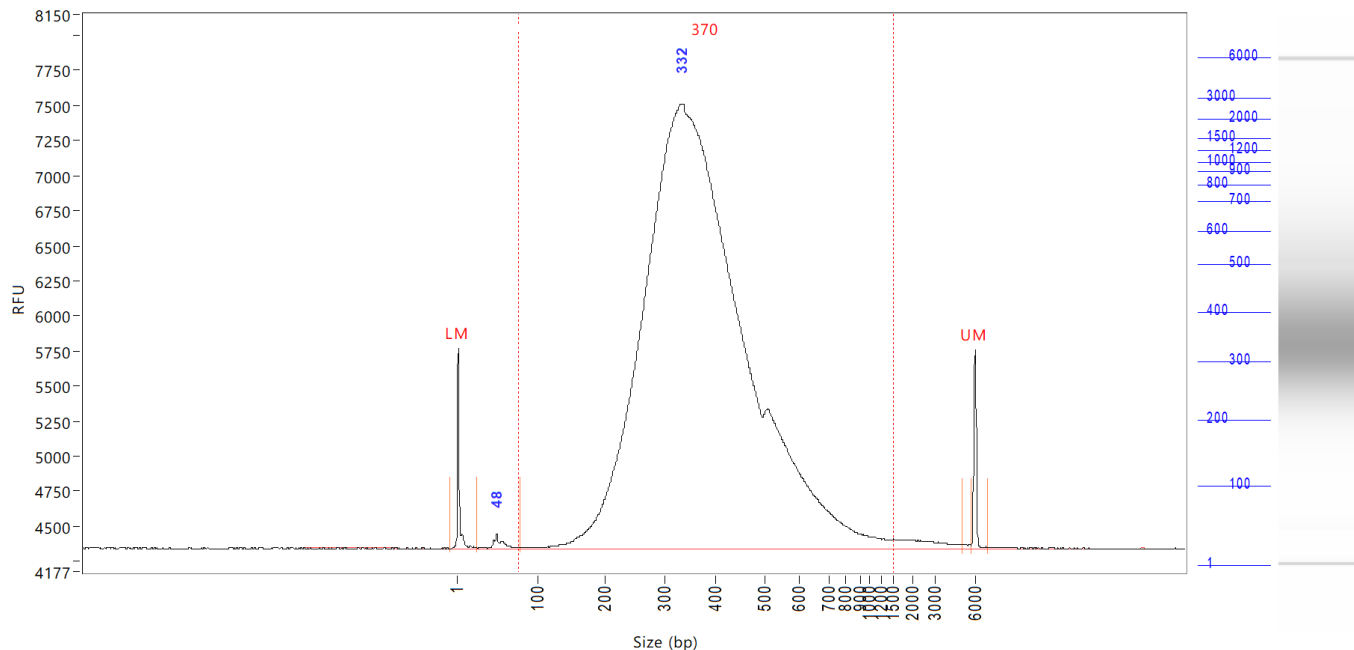

| Peak | Size (bp) | Conc. (ng/uL) | From (bp) | To (bp) | RFU  |
|------|-----------|---------------|-----------|---------|------|
| 1    | 1 (LM)    | 0.0124        | 0         | 26      | 1427 |
| 2    | 48        | 0.0365        | 26        | 77      | 102  |
| 3    | 332       | 10.3233       | 77        | 5060    | 3173 |
| 4    | 6000 (UM) | 0.0072        | 5695      | 6909    | 1413 |

TIC: 10.3598 ng/uL  
 TIM: 45.4023 nmole/L  
 Total Conc.: 10.3641 ng/uL

Smear Analysis      75 bp to 1500 bp      10.2559 ng/ul      99.0 %Total      45.6594 nmole/L      370 Avg. Size (b.p.)      32.91 %CV

Sample Peak Width (sec): 50    Sample Min Peak Height: 25    Sample Baseline V to V?: Y    Sample Baseline V to V pts: 3  
 Sample Filter: Binomial    # of Pts for Filter: 3    Sample Start Region (min): 0    Sample End Region (min): 50  
 Manual Baseline Start (min): 10    Manual Baseline End (min): 48  
 Marker Peak Width (sec): 5    Marker Min Peak Height: 200    Marker Baseline V to V?: Y    Marker Baseline V to V pts: 3  
 Lower Marker Selection: First Peak > 200 RFU    Upper Marker Selection: Last Peak > 200 RFU  
 Ladder Size (bp): 1, 100, 200, 300, 400, 500, 600, 700, 800, 900, 1000, 1200, 1500, 2000, 3000, 6000  
 Quantification Using: Ladder    Final Concentration (ng/uL): 0.0830    Dilution Factor: 12.0

Sample: 103613-001-010

Well Location: B2

Created: Friday, June 21, 2019 2:11:36 PM

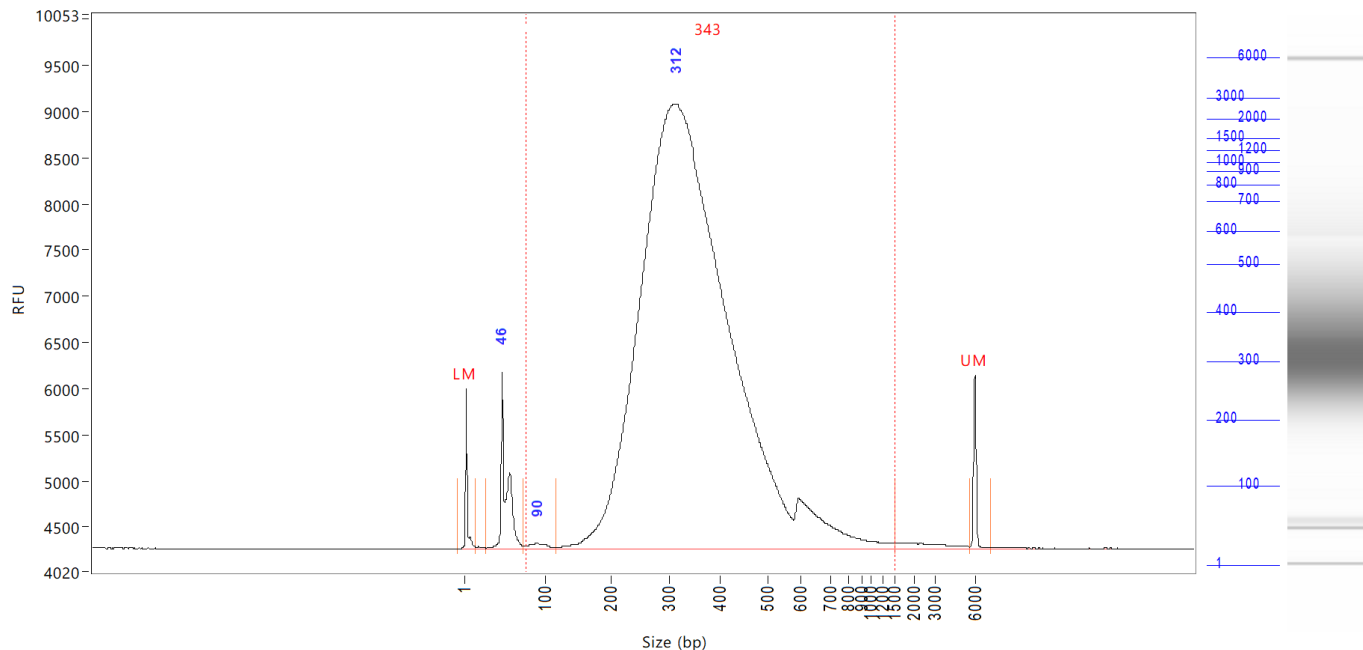

| Peak | Size (bp) | Conc. (ng/uL) | From (bp) | To (bp) | RFU  |
|------|-----------|---------------|-----------|---------|------|
| 1    | 1 (LM)    | 0.0124        | 0         | 15      | 1730 |
| 2    | 46        | 0.3996        | 26        | 74      | 1907 |
| 3    | 90        | 0.0396        | 74        | 116     | 58   |
| 4    | 312       | 11.9353       | 116       | 1519    | 4822 |
| 5    | 6000 (UM) | 0.0081        | 5619      | 7111    | 1880 |

TIC: 12.3745 ng/uL  
 TIM: 70.6277 nmole/L  
 Total Conc.: 12.4369 ng/uL

Smear Analysis      75 bp to 1500 bp      11.9725 ng/uL      96.3 %Total      57.3533 nmole/L      343 Avg. Size (b.p.)      31.83 %CV

Sample Peak Width (sec): 50      Sample Min Peak Height: 25      Sample Baseline V to V?: Y      Sample Baseline V to V pts: 3  
 Sample Filter: Binomial      # of Pts for Filter: 3      Sample Start Region (min): 0      Sample End Region (min): 50  
 Manual Baseline Start (min): 10      Manual Baseline End (min): 48  
 Marker Peak Width (sec): 5      Marker Min Peak Height: 200      Marker Baseline V to V?: Y      Marker Baseline V to V pts: 3  
 Lower Marker Selection: First Peak > 200 RFU      Upper Marker Selection: Last Peak > 200 RFU  
 Ladder Size (bp): 1, 100, 200, 300, 400, 500, 600, 700, 800, 900, 1000, 1200, 1500, 2000, 3000, 6000  
 Quantification Using: Ladder      Final Concentration (ng/uL): 0.0830      Dilution Factor: 12.0

**Sample:** 103613-001-011

**Well Location:** C2

**Created:** Friday, June 21, 2019 2:11:36 PM

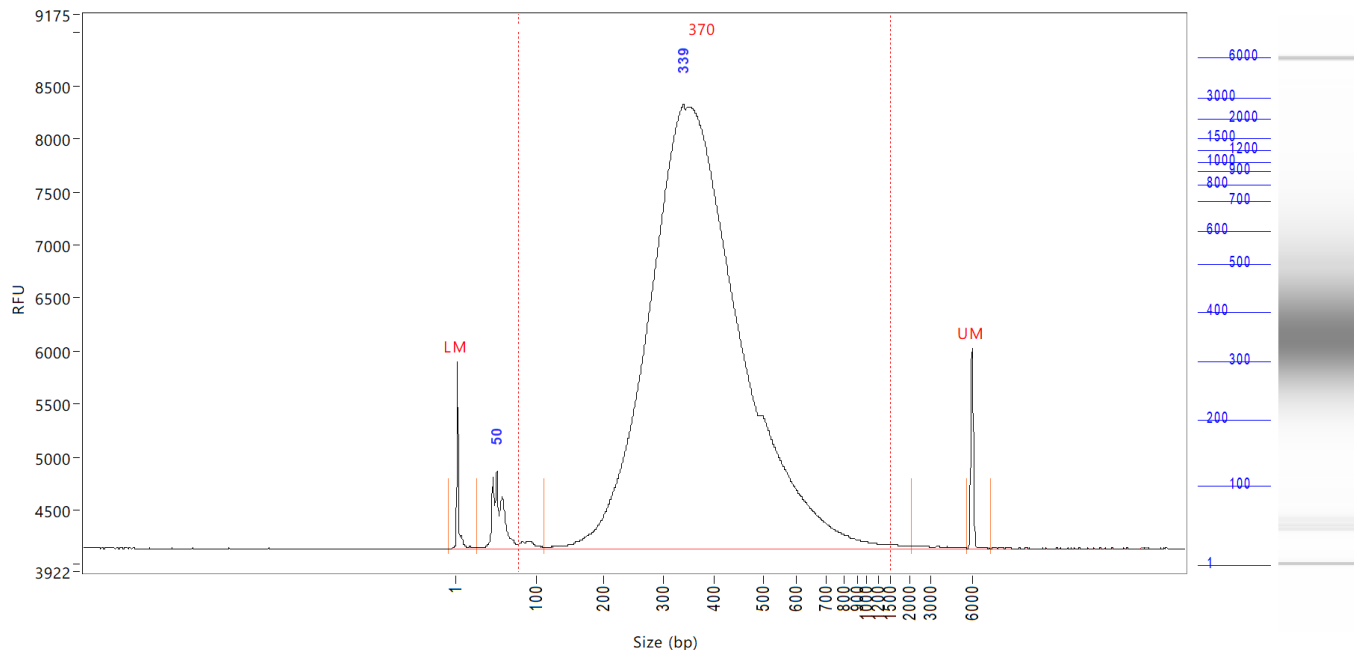

| Peak | Size (bp) | Conc. (ng/uL) | From (bp) | To (bp) | RFU  |
|------|-----------|---------------|-----------|---------|------|
| 1    | 1 (LM)    | 0.0124        | 0         | 27      | 1765 |
| 2    | 50        | 0.3080        | 27        | 111     | 729  |
| 3    | 339       | 9.8649        | 111       | 2068    | 4199 |
| 4    | 6000 (UM) | 0.0076        | 5644      | 7389    | 1891 |

TIC: 10.1729 ng/uL  
 TIM: 52.5256 nmole/L  
 Total Conc.: 10.1892 ng/uL

Smear Analysis      75 bp to 1500 bp      9.8909 ng/uL      97.1 %Total      43.9755 nmole/L      370 Avg. Size (b.p.)      29.42 %CV

Sample Peak Width (sec): 50      Sample Min Peak Height: 25      Sample Baseline V to V?: Y      Sample Baseline V to V pts: 3  
 Sample Filter: Binomial      # of Pts for Filter: 3      Sample Start Region (min): 0      Sample End Region (min): 50  
 Manual Baseline Start (min): 10      Manual Baseline End (min): 48  
 Marker Peak Width (sec): 5      Marker Min Peak Height: 200      Marker Baseline V to V?: Y      Marker Baseline V to V pts: 3  
 Lower Marker Selection: First Peak > 200 RFU      Upper Marker Selection: Last Peak > 200 RFU  
 Ladder Size (bp): 1, 100, 200, 300, 400, 500, 600, 700, 800, 900, 1000, 1200, 1500, 2000, 3000, 6000  
 Quantification Using: Ladder      Final Concentration (ng/uL): 0.0830      Dilution Factor: 12.0



Sample: 103613-001-012

Well Location: D2

Created: Friday, June 21, 2019 2:11:36 PM

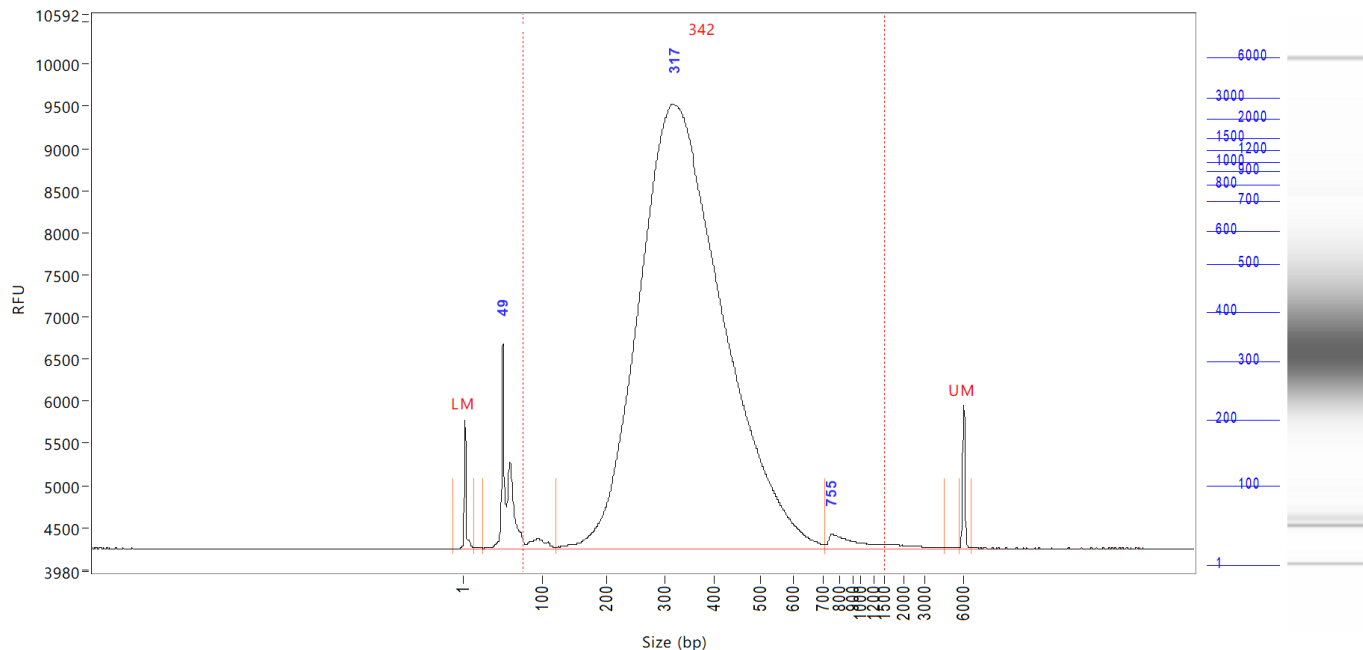

| Peak | Size (bp) | Conc. (ng/uL) | From (bp) | To (bp) | RFU  |
|------|-----------|---------------|-----------|---------|------|
| 1    | 1 (LM)    | 0.0124        | 0         | 15      | 1527 |
| 2    | 49        | 0.6711        | 24        | 121     | 2432 |
| 3    | 317       | 13.9625       | 121       | 715     | 5282 |
| 4    | 755       | 0.1412        | 715       | 4526    | 177  |
| 5    | 6000 (UM) | 0.0080        | 5670      | 6581    | 1698 |

TIC: 14.7748 ng/uL  
 TIM: 86.2823 nmole/L  
 Total Conc.: 14.7814 ng/uL

Smear Analysis      75 bp to 1500 bp      14.1563 ng/uL      95.8 %Total      68.0430 nmole/L      342 Avg. Size (b.p.)      28.83 %CV

Sample Peak Width (sec): 50      Sample Min Peak Height: 25      Sample Baseline V to V?: Y      Sample Baseline V to V pts: 3  
 Sample Filter: Binomial      # of Pts for Filter: 3      Sample Start Region (min): 0      Sample End Region (min): 50  
 Manual Baseline Start (min): 10      Manual Baseline End (min): 48  
 Marker Peak Width (sec): 5      Marker Min Peak Height: 200      Marker Baseline V to V?: Y      Marker Baseline V to V pts: 3  
 Lower Marker Selection: First Peak > 200 RFU      Upper Marker Selection: Last Peak > 200 RFU  
 Ladder Size (bp): 1, 100, 200, 300, 400, 500, 600, 700, 800, 900, 1000, 1200, 1500, 2000, 3000, 6000  
 Quantification Using: Ladder      Final Concentration (ng/uL): 0.0830      Dilution Factor: 12.0

**Sample:** 103613-001-013

**Well Location:** E2

**Created:** Friday, June 21, 2019 2:11:36 PM

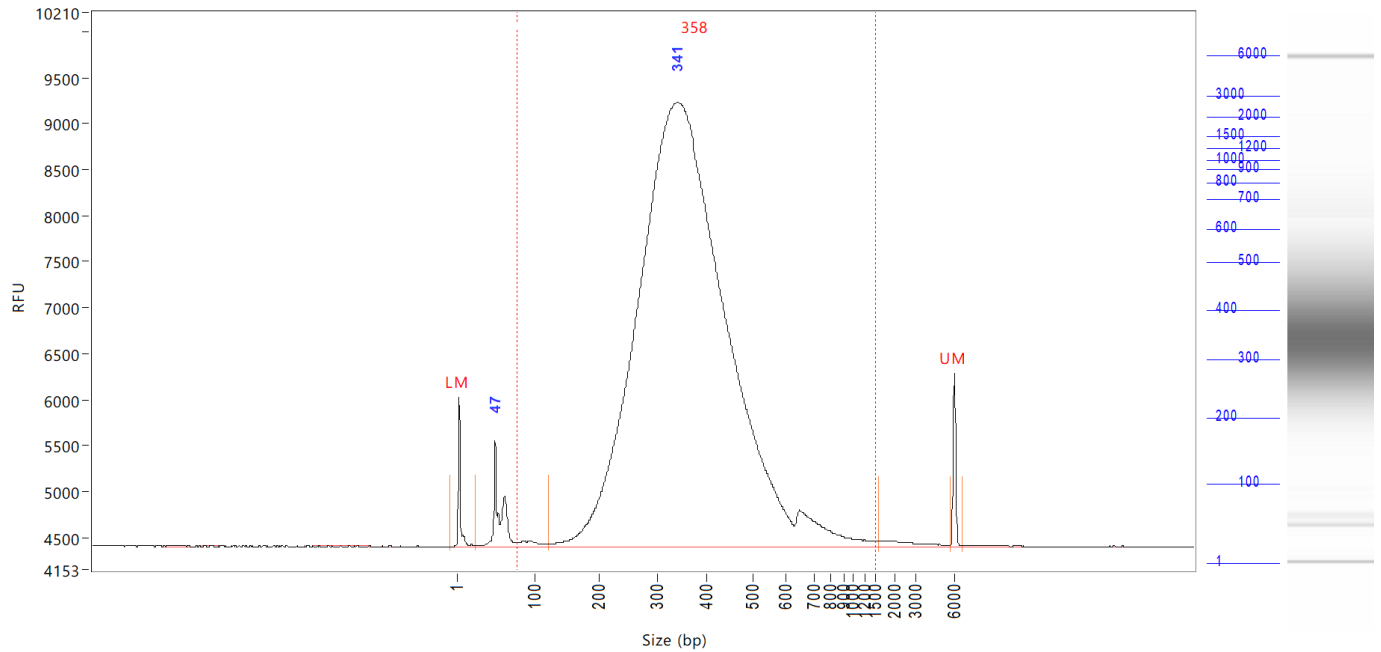

| Peak | Size (bp) | Conc. (ng/uL) | From (bp) | To (bp) | RFU  |
|------|-----------|---------------|-----------|---------|------|
| 1    | 1 (LM)    | 0.0124        | 0         | 24      | 1622 |
| 2    | 47        | 0.3158        | 24        | 119     | 1156 |
| 3    | 341       | 12.3053       | 119       | 1554    | 4837 |
| 4    | 6000 (UM) | 0.0083        | 5670      | 6556    | 1884 |

TIC: 12.6210 ng/uL  
 TIM: 65.3137 nmole/L  
 Total Conc.: 12.6695 ng/uL

Smear Analysis      75 bp to 1500 bp      12.3442 ng/uL      97.4 %Total      56.7146 nmole/L      358 Avg. Size (b.p.)      30.43 %CV

Sample Peak Width (sec): 50      Sample Min Peak Height: 25      Sample Baseline V to V?: Y      Sample Baseline V to V pts: 3  
 Sample Filter: Binomial      # of Pts for Filter: 3      Sample Start Region (min): 0      Sample End Region (min): 50  
 Manual Baseline Start (min): 10      Manual Baseline End (min): 48  
 Marker Peak Width (sec): 5      Marker Min Peak Height: 200      Marker Baseline V to V?: Y      Marker Baseline V to V pts: 3  
 Lower Marker Selection: First Peak > 200 RFU      Upper Marker Selection: Last Peak > 200 RFU  
 Ladder Size (bp): 1, 100, 200, 300, 400, 500, 600, 700, 800, 900, 1000, 1200, 1500, 2000, 3000, 6000  
 Quantification Using: Ladder      Final Concentration (ng/uL): 0.0830      Dilution Factor: 12.0

Sample: 103613-001-014

Well Location: F2

Created: Friday, June 21, 2019 2:11:36 PM

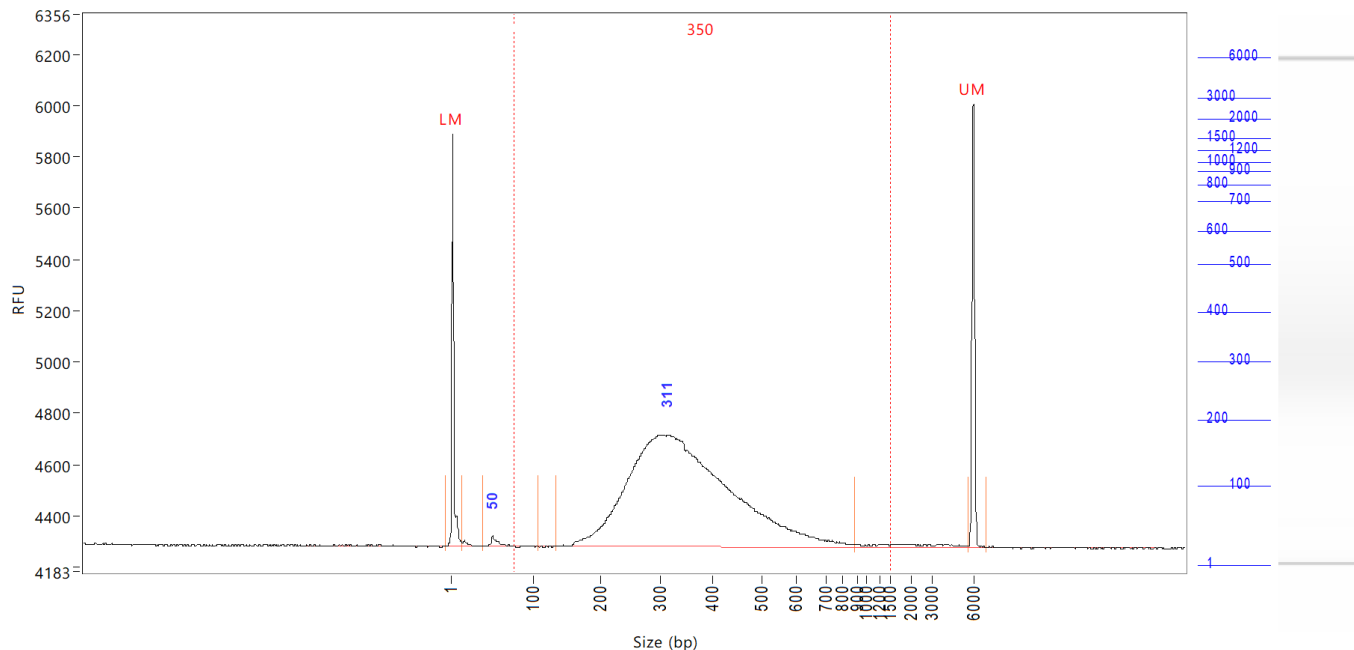

| Peak | Size (bp) | Conc. (ng/uL) | From (bp) | To (bp) | RFU  |
|------|-----------|---------------|-----------|---------|------|
| 1    | 1 (LM)    | 0.0124        | 0         | 14      | 1608 |
| 2    | 50        | 0.0103        | 39        | 108     | 41   |
| 3    | 311       | 1.3197        | 134       | 890     | 436  |
| 4    | 6000 (UM) | 0.0079        | 5644      | 6960    | 1731 |

TIC: 1.3300 ng/uL  
 TIM: 6.5687 nmole/L  
 Total Conc.: 1.3521 ng/uL

Smear Analysis      75 bp to 1500 bp      1.3256 ng/uL      98.0 %Total      6.2232 nmole/L      350 Avg. Size (b.p.)      32.96 %CV

Sample Peak Width (sec): 50      Sample Min Peak Height: 25      Sample Baseline V to V?: Y      Sample Baseline V to V pts: 3  
 Sample Filter: Binomial      # of Pts for Filter: 3      Sample Start Region (min): 0      Sample End Region (min): 50  
 Manual Baseline Start (min): 10      Manual Baseline End (min): 48  
 Marker Peak Width (sec): 5      Marker Min Peak Height: 200      Marker Baseline V to V?: Y      Marker Baseline V to V pts: 3  
 Lower Marker Selection: First Peak > 200 RFU      Upper Marker Selection: Last Peak > 200 RFU  
 Ladder Size (bp): 1, 100, 200, 300, 400, 500, 600, 700, 800, 900, 1000, 1200, 1500, 2000, 3000, 6000  
 Quantification Using: Ladder      Final Concentration (ng/uL): 0.0830      Dilution Factor: 12.0

Sample: 103613-001-015

Well Location: G2

Created: Friday, June 21, 2019 2:11:36 PM

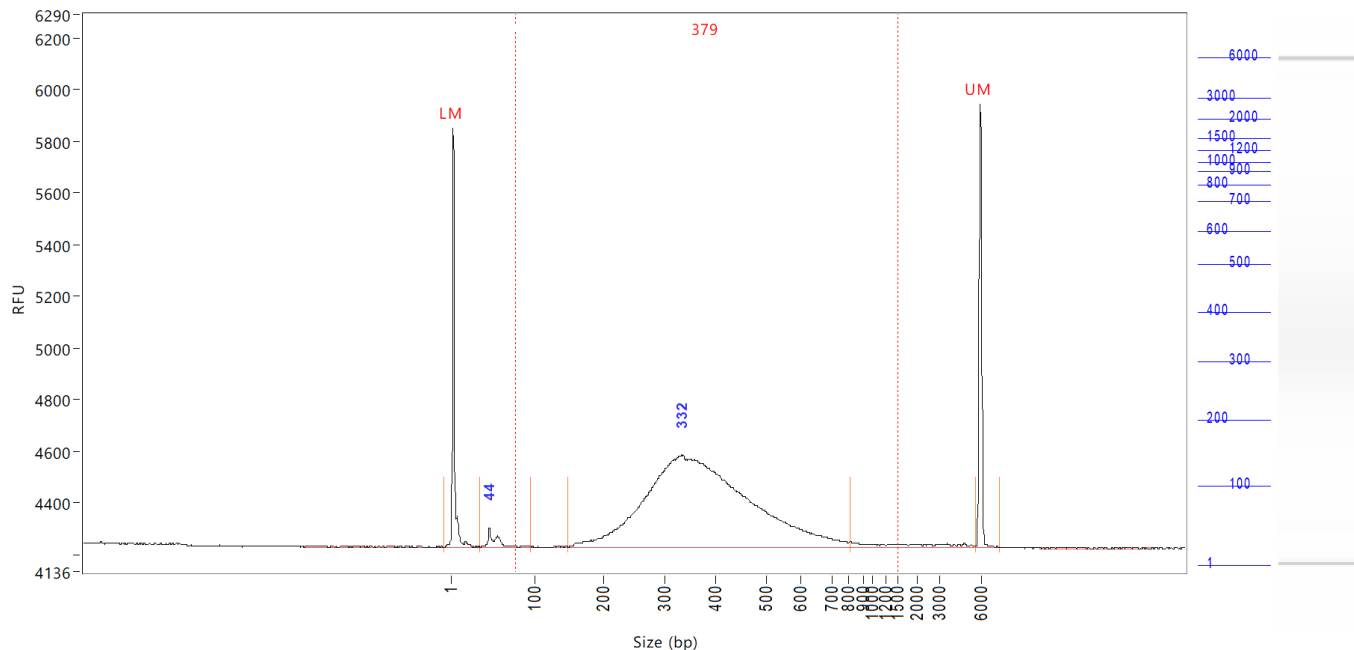

| Peak         | Size (bp) | Conc. (ng/uL) | From (bp) | To (bp) | RFU  |
|--------------|-----------|---------------|-----------|---------|------|
| 1            | 1 (LM)    | 0.0124        | 0         | 34      | 1618 |
| 2            | 44        | 0.0245        | 34        | 94      | 76   |
| 3            | 332       | 1.0246        | 148       | 811     | 357  |
| 4            | 6000 (UM) | 0.0074        | 5593      | 7389    | 1719 |
| TIC:         |           | 1.0491        | ng/uL     |         |      |
| TIM:         |           | 5.2621        | nmole/L   |         |      |
| Total Conc.: |           | 1.0797        | ng/uL     |         |      |

Smear Analysis      75 bp to 1500 bp      1.0407 ng/uL      96.4 %Total      4.5184 nmole/L      379 Avg. Size (b.p.)      34.45 %CV

Sample Peak Width (sec): 50    Sample Min Peak Height: 25    Sample Baseline V to V?: Y    Sample Baseline V to V pts: 3  
 Sample Filter: Binomial    # of Pts for Filter: 3    Sample Start Region (min): 0    Sample End Region (min): 50  
 Manual Baseline Start (min): 10    Manual Baseline End (min): 48  
 Marker Peak Width (sec): 5    Marker Min Peak Height: 200    Marker Baseline V to V?: Y    Marker Baseline V to V pts: 3  
 Lower Marker Selection: First Peak > 200 RFU    Upper Marker Selection: Last Peak > 200 RFU  
 Ladder Size (bp): 1, 100, 200, 300, 400, 500, 600, 700, 800, 900, 1000, 1200, 1500, 2000, 3000, 6000  
 Quantification Using: Ladder    Final Concentration (ng/uL): 0.0830    Dilution Factor: 12.0

Sample: 103613-001-016

Well Location: H2

Created: Friday, June 21, 2019 2:11:36 PM

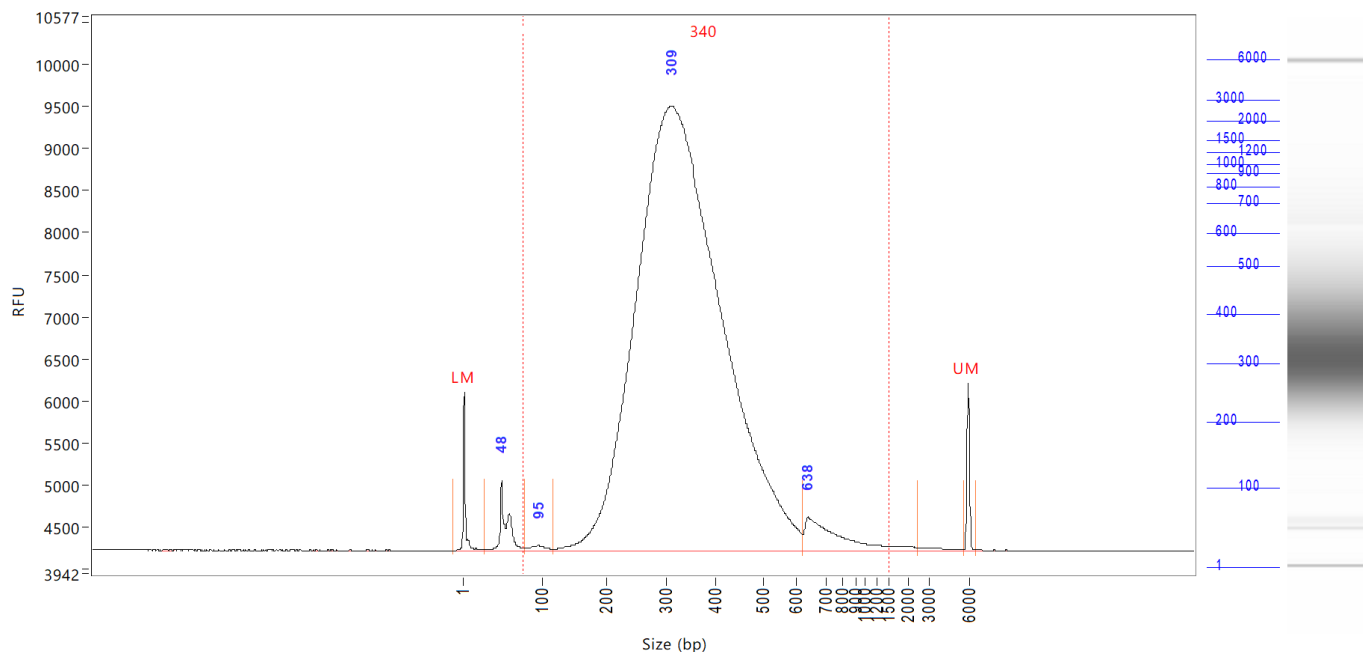

| Peak | Size (bp) | Conc. (ng/uL) | From (bp) | To (bp) | RFU  |
|------|-----------|---------------|-----------|---------|------|
| 1    | 1 (LM)    | 0.0124        | 0         | 27      | 1881 |
| 2    | 48        | 0.1971        | 27        | 78      | 838  |
| 3    | 95        | 0.0294        | 78        | 116     | 58   |
| 4    | 309       | 11.6091       | 116       | 622     | 5299 |
| 5    | 638       | 0.2761        | 622       | 2451    | 398  |
| 6    | 6000 (UM) | 0.0075        | 5670      | 6606    | 1988 |

TIC: 12.1117 ng/uL  
 TIM: 64.7264 nmole/L  
 Total Conc.: 12.1263 ng/uL

Smear Analysis 75 bp to 1500 bp 11.8942 ng/ul 98.1 %Total 57.5852 nmole/L 340 Avg. Size (b.p.) 30.81 %CV

Sample Peak Width (sec): 50 Sample Min Peak Height: 25 Sample Baseline V to V?: Y Sample Baseline V to V pts: 3  
 Sample Filter: Binomial # of Pts for Filter: 3 Sample Start Region (min): 0 Sample End Region (min): 50  
 Manual Baseline Start (min): 10 Manual Baseline End (min): 48  
 Marker Peak Width (sec): 5 Marker Min Peak Height: 200 Marker Baseline V to V?: Y Marker Baseline V to V pts: 3  
 Lower Marker Selection: First Peak > 200 RFU Upper Marker Selection: Last Peak > 200 RFU  
 Ladder Size (bp): 1, 100, 200, 300, 400, 500, 600, 700, 800, 900, 1000, 1200, 1500, 2000, 3000, 6000  
 Quantification Using: Ladder Final Concentration (ng/uL): 0.0830 Dilution Factor: 12.0

Sample: 103613-001-017

Well Location: A3

Created: Friday, June 21, 2019 2:11:36 PM

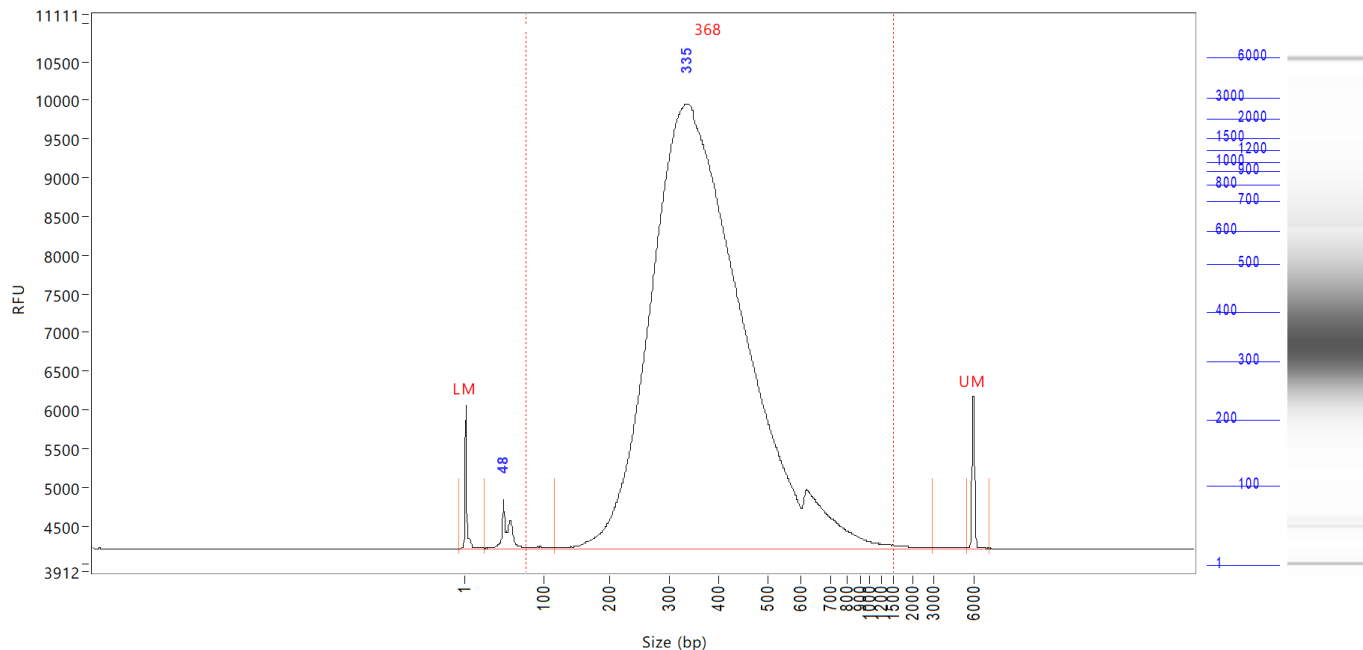

| Peak | Size (bp) | Conc. (ng/uL) | From (bp) | To (bp) | RFU  |
|------|-----------|---------------|-----------|---------|------|
| 1    | 1 (LM)    | 0.0124        | 0         | 26      | 1849 |
| 2    | 48        | 0.1667        | 26        | 115     | 629  |
| 3    | 335       | 13.0558       | 115       | 3000    | 5755 |
| 4    | 6000 (UM) | 0.0076        | 5517      | 7162    | 1977 |

TIC: 13.2225 ng/uL  
 TIM: 62.7754 nmole/L  
 Total Conc.: 13.2317 ng/uL

Smear Analysis      75 bp to 1500 bp      13.0558 ng/uL      98.7 %Total      58.3082 nmole/L      368 Avg. Size (b.p.)      29.68 %CV

Sample Peak Width (sec): 50      Sample Min Peak Height: 25      Sample Baseline V to V?: Y      Sample Baseline V to V pts: 3  
 Sample Filter: Binomial      # of Pts for Filter: 3      Sample Start Region (min): 0      Sample End Region (min): 50  
 Manual Baseline Start (min): 10      Manual Baseline End (min): 48  
 Marker Peak Width (sec): 5      Marker Min Peak Height: 200      Marker Baseline V to V?: Y      Marker Baseline V to V pts: 3  
 Lower Marker Selection: First Peak > 200 RFU      Upper Marker Selection: Last Peak > 200 RFU  
 Ladder Size (bp): 1, 100, 200, 300, 400, 500, 600, 700, 800, 900, 1000, 1200, 1500, 2000, 3000, 6000  
 Quantification Using: Ladder      Final Concentration (ng/uL): 0.0830      Dilution Factor: 12.0

Sample: 103613-001-018

Well Location: B3

Created: Friday, June 21, 2019 2:11:36 PM

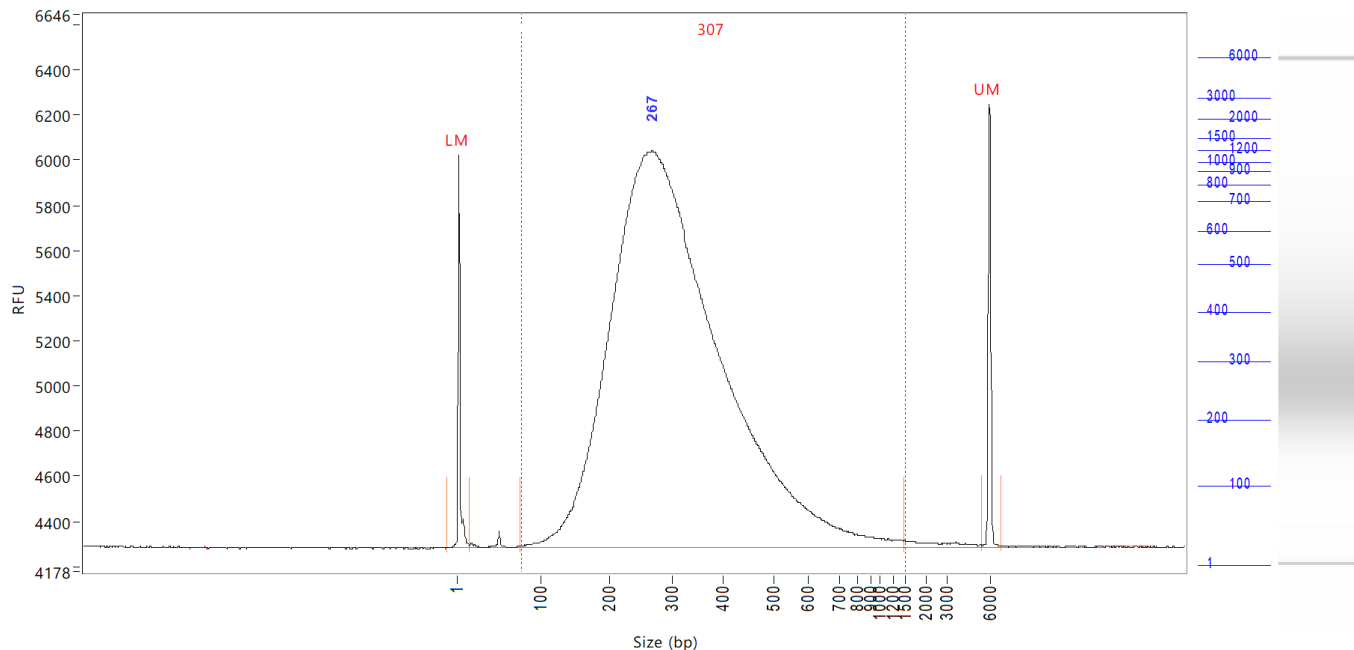

| Peak         | Size (bp) | Conc. (ng/uL) | From (bp) | To (bp) | RFU  |
|--------------|-----------|---------------|-----------|---------|------|
| 1            | 1 (LM)    | 0.0124        | 0         | 14      | 1742 |
| 2            | 267       | 5.4291        | 74        | 1464    | 1759 |
| 3            | 6000 (UM) | 0.0079        | 5466      | 6808    | 1965 |
| TIC:         |           | 5.4291        | ng/uL     |         |      |
| TIM:         |           | 29.0902       | nmole/L   |         |      |
| Total Conc.: |           | 5.4655        | ng/uL     |         |      |

Smear Analysis      75 bp to 1500 bp      5.4296 ng/uL      99.3 %Total      29.0889 nmole/L      307 Avg. Size (b.p.)      38.38 %CV

Sample Peak Width (sec): 50      Sample Min Peak Height: 25      Sample Baseline V to V?: Y      Sample Baseline V to V pts: 3  
 Sample Filter: Binomial      # of Pts for Filter: 3      Sample Start Region (min): 0      Sample End Region (min): 50  
 Manual Baseline Start (min): 10      Manual Baseline End (min): 48  
 Marker Peak Width (sec): 5      Marker Min Peak Height: 200      Marker Baseline V to V?: Y      Marker Baseline V to V pts: 3  
 Lower Marker Selection: First Peak > 200 RFU      Upper Marker Selection: Last Peak > 200 RFU  
 Ladder Size (bp): 1, 100, 200, 300, 400, 500, 600, 700, 800, 900, 1000, 1200, 1500, 2000, 3000, 6000  
 Quantification Using: Ladder      Final Concentration (ng/uL): 0.0830      Dilution Factor: 12.0

Sample: 103613-001-019

Well Location: C3

Created: Friday, June 21, 2019 2:11:36 PM

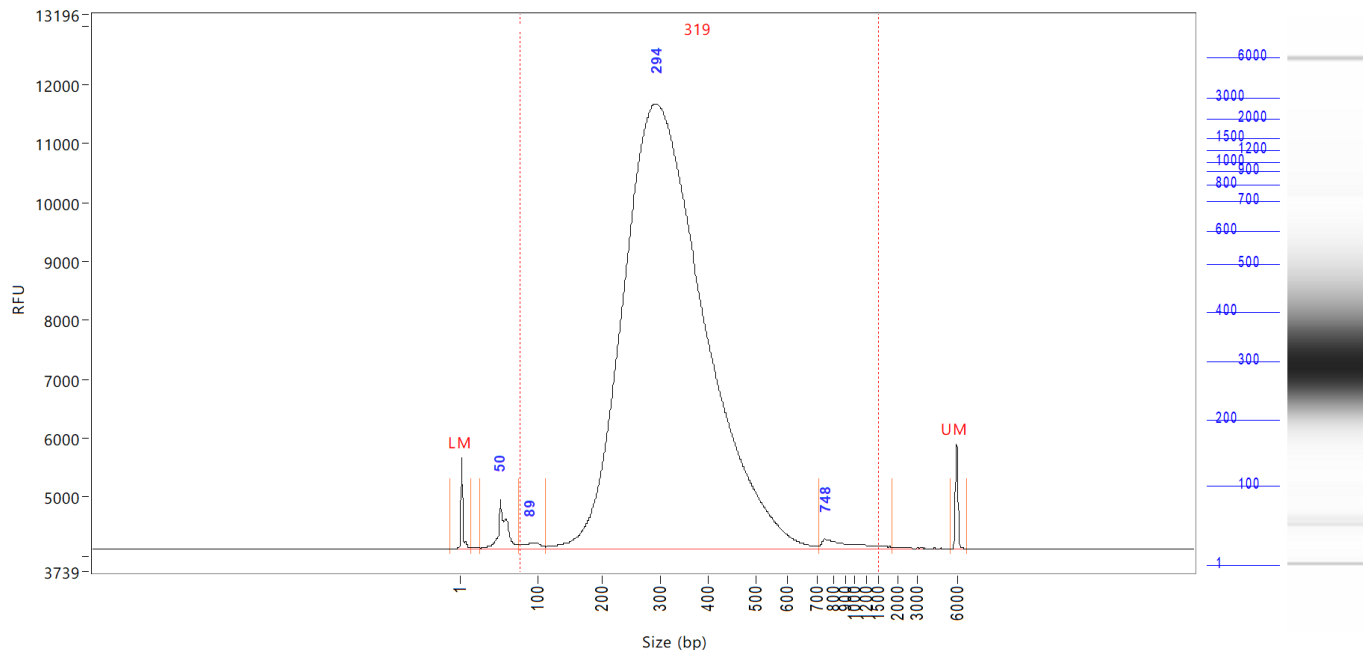

| Peak | Size (bp) | Conc. (ng/uL) | From (bp) | To (bp) | RFU  |
|------|-----------|---------------|-----------|---------|------|
| 1    | 1 (LM)    | 0.0124        | 0         | 14      | 1545 |
| 2    | 50        | 0.2939        | 26        | 74      | 846  |
| 3    | 89        | 0.0748        | 74        | 111     | 97   |
| 4    | 294       | 19.2305       | 111       | 713     | 7563 |
| 5    | 748       | 0.1214        | 713       | 1875    | 170  |
| 6    | 6000 (UM) | 0.0083        | 5543      | 6808    | 1789 |

TIC: 19.7207 ng/uL  
 TIM: 110.2772 nmole/L  
 Total Conc.: 19.7412 ng/uL

Smear Analysis      75 bp to 1500 bp      19.4127 ng/ul      98.3 %Total      100.0091 nmole/L      319 Avg. Size (b.p.)      29.04 %CV

Sample Peak Width (sec): 50      Sample Min Peak Height: 25      Sample Baseline V to V?: Y      Sample Baseline V to V pts: 3  
 Sample Filter: Binomial      # of Pts for Filter: 3      Sample Start Region (min): 0      Sample End Region (min): 50  
 Manual Baseline Start (min): 10      Manual Baseline End (min): 48  
 Marker Peak Width (sec): 5      Marker Min Peak Height: 200      Marker Baseline V to V?: Y      Marker Baseline V to V pts: 3  
 Lower Marker Selection: First Peak > 200 RFU      Upper Marker Selection: Last Peak > 200 RFU  
 Ladder Size (bp): 1, 100, 200, 300, 400, 500, 600, 700, 800, 900, 1000, 1200, 1500, 2000, 3000, 6000  
 Quantification Using: Ladder      Final Concentration (ng/uL): 0.0830      Dilution Factor: 12.0



Sample: 103613-001-020

Well Location: D3

Created: Friday, June 21, 2019 2:11:36 PM

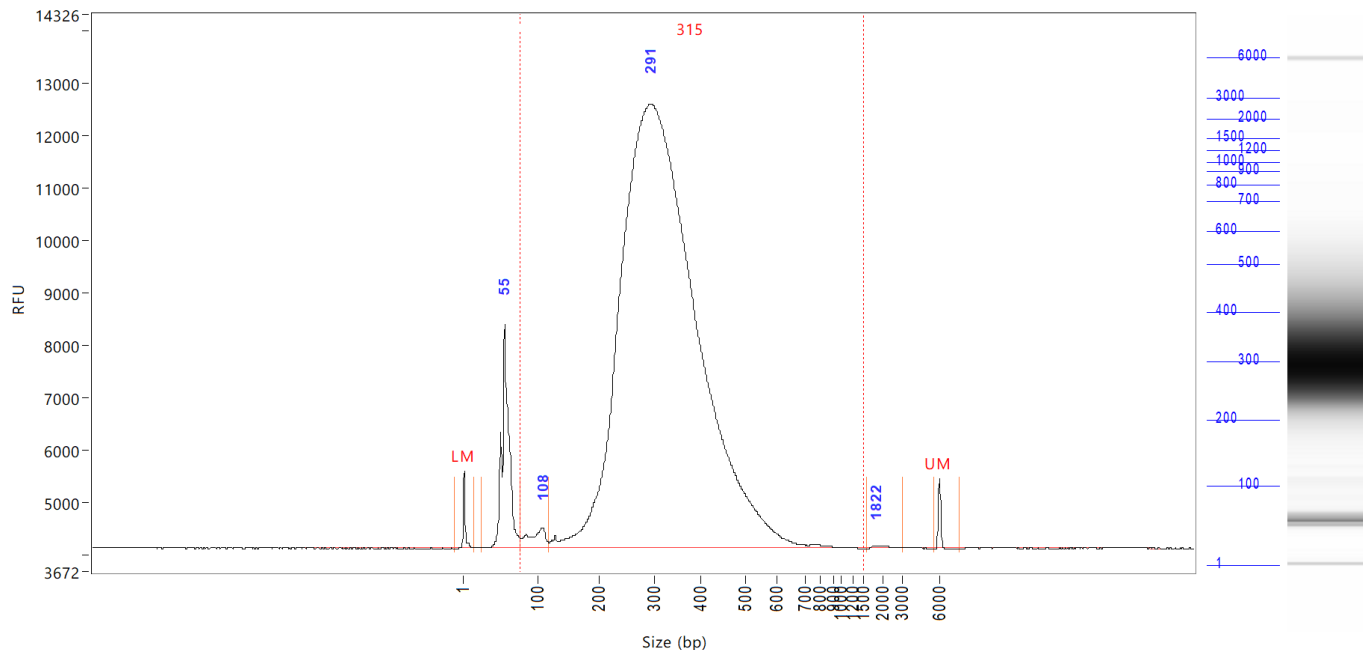

| Peak | Size (bp) | Conc. (ng/uL) | From (bp) | To (bp) | RFU  |
|------|-----------|---------------|-----------|---------|------|
| 1    | 1 (LM)    | 0.0124        | 0         | 15      | 1466 |
| 2    | 55        | 1.4379        | 26        | 78      | 4287 |
| 3    | 108       | 0.2615        | 78        | 118     | 398  |
| 4    | 291       | 22.4996       | 118       | 1581    | 8504 |
| 5    | 1822      | 0.0187        | 1581      | 3103    | 37   |
| 6    | 6000 (UM) | 0.0065        | 5543      | 7566    | 1321 |

TIC: 24.2178 ng/uL  
 TIM: 162.1750 nmole/L  
 Total Conc.: 24.2207 ng/uL

Smear Analysis      75 bp to 1500 bp      22.7739 ng/uL      94.0 %Total      118.8363 nmole/L      315 Avg. Size (b.p.)      26.50 %CV

Sample Peak Width (sec): 50      Sample Min Peak Height: 25      Sample Baseline V to V?: Y      Sample Baseline V to V pts: 3  
 Sample Filter: Binomial      # of Pts for Filter: 3      Sample Start Region (min): 0      Sample End Region (min): 50  
 Manual Baseline Start (min): 10      Manual Baseline End (min): 48  
 Marker Peak Width (sec): 5      Marker Min Peak Height: 200      Marker Baseline V to V?: Y      Marker Baseline V to V pts: 3  
 Lower Marker Selection: First Peak > 200 RFU      Upper Marker Selection: Last Peak > 200 RFU  
 Ladder Size (bp): 1, 100, 200, 300, 400, 500, 600, 700, 800, 900, 1000, 1200, 1500, 2000, 3000, 6000  
 Quantification Using: Ladder      Final Concentration (ng/uL): 0.0830      Dilution Factor: 12.0

Sample: 103613-001-021

Well Location: E3

Created: Friday, June 21, 2019 2:11:36 PM

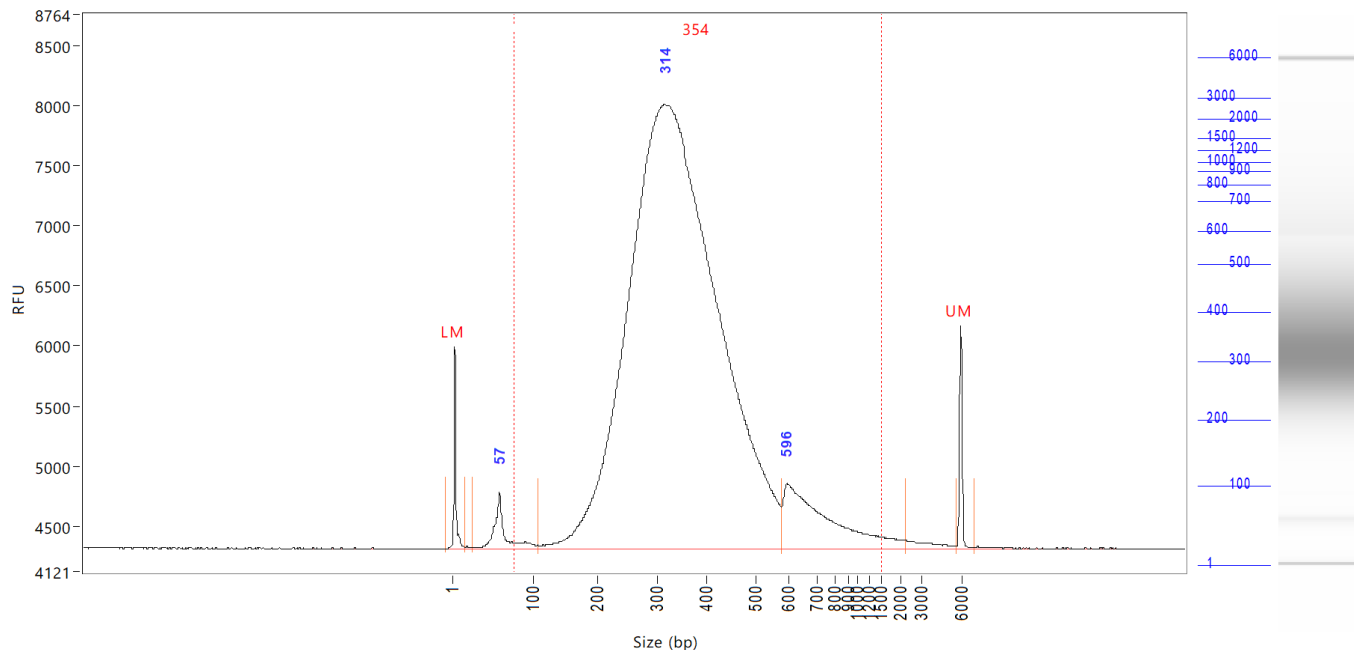

| Peak | Size (bp) | Conc. (ng/uL) | From (bp) | To (bp) | RFU  |
|------|-----------|---------------|-----------|---------|------|
| 1    | 1 (LM)    | 0.0124        | 0         | 14      | 1685 |
| 2    | 57        | 0.1855        | 24        | 109     | 475  |
| 3    | 314       | 9.6270        | 109       | 579     | 3708 |
| 4    | 596       | 0.5690        | 579       | 2267    | 540  |
| 5    | 6000 (UM) | 0.0082        | 5670      | 6960    | 1861 |

TIC: 10.3816 ng/uL  
 TIM: 53.4765 nmole/L  
 Total Conc.: 10.4182 ng/uL

Smear Analysis      75 bp to 1500 bp      10.1907 ng/uL      97.8 %Total      47.3698 nmole/L      354 Avg. Size (b.p.)      36.20 %CV

Sample Peak Width (sec): 50      Sample Min Peak Height: 25      Sample Baseline V to V?: Y      Sample Baseline V to V pts: 3  
 Sample Filter: Binomial      # of Pts for Filter: 3      Sample Start Region (min): 0      Sample End Region (min): 50  
 Manual Baseline Start (min): 10      Manual Baseline End (min): 48  
 Marker Peak Width (sec): 5      Marker Min Peak Height: 200      Marker Baseline V to V?: Y      Marker Baseline V to V pts: 3  
 Lower Marker Selection: First Peak > 200 RFU      Upper Marker Selection: Last Peak > 200 RFU  
 Ladder Size (bp): 1, 100, 200, 300, 400, 500, 600, 700, 800, 900, 1000, 1200, 1500, 2000, 3000, 6000  
 Quantification Using: Ladder      Final Concentration (ng/uL): 0.0830      Dilution Factor: 12.0

Sample: 103613-001-022

Well Location: F3

Created: Friday, June 21, 2019 2:11:36 PM

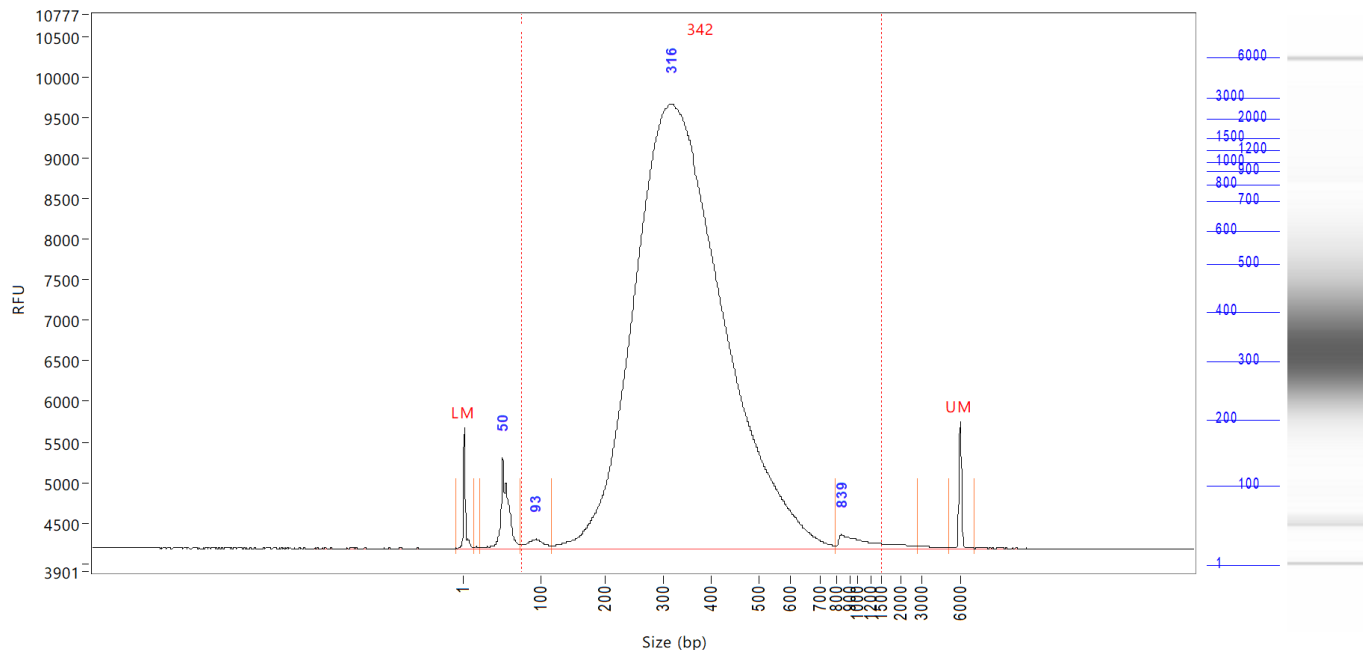

| Peak | Size (bp) | Conc. (ng/uL) | From (bp) | To (bp) | RFU  |
|------|-----------|---------------|-----------|---------|------|
| 1    | 1 (LM)    | 0.0124        | 0         | 15      | 1491 |
| 2    | 50        | 0.3614        | 23        | 75      | 1113 |
| 3    | 93        | 0.0788        | 75        | 117     | 116  |
| 4    | 316       | 15.5625       | 117       | 800     | 5493 |
| 5    | 839       | 0.1317        | 800       | 2834    | 173  |
| 6    | 6000 (UM) | 0.0076        | 5110      | 7111    | 1560 |

TIC: 16.1344 ng/uL  
 TIM: 88.0513 nmole/L  
 Total Conc.: 16.1490 ng/uL

Smear Analysis      75 bp to 1500 bp      15.7391 ng/ul      97.5 %Total      75.6451 nmole/L      342 Avg. Size (b.p.)      30.62 %CV

Sample Peak Width (sec): 50      Sample Min Peak Height: 25      Sample Baseline V to V?: Y      Sample Baseline V to V pts: 3  
 Sample Filter: Binomial      # of Pts for Filter: 3      Sample Start Region (min): 0      Sample End Region (min): 50  
 Manual Baseline Start (min): 10      Manual Baseline End (min): 48  
 Marker Peak Width (sec): 5      Marker Min Peak Height: 200      Marker Baseline V to V?: Y      Marker Baseline V to V pts: 3  
 Lower Marker Selection: First Peak > 200 RFU      Upper Marker Selection: Last Peak > 200 RFU  
 Ladder Size (bp): 1, 100, 200, 300, 400, 500, 600, 700, 800, 900, 1000, 1200, 1500, 2000, 3000, 6000  
 Quantification Using: Ladder      Final Concentration (ng/uL): 0.0830      Dilution Factor: 12.0

**Sample:** 103613-001-023

**Well Location:** G3

**Created:** Friday, June 21, 2019 2:11:36 PM

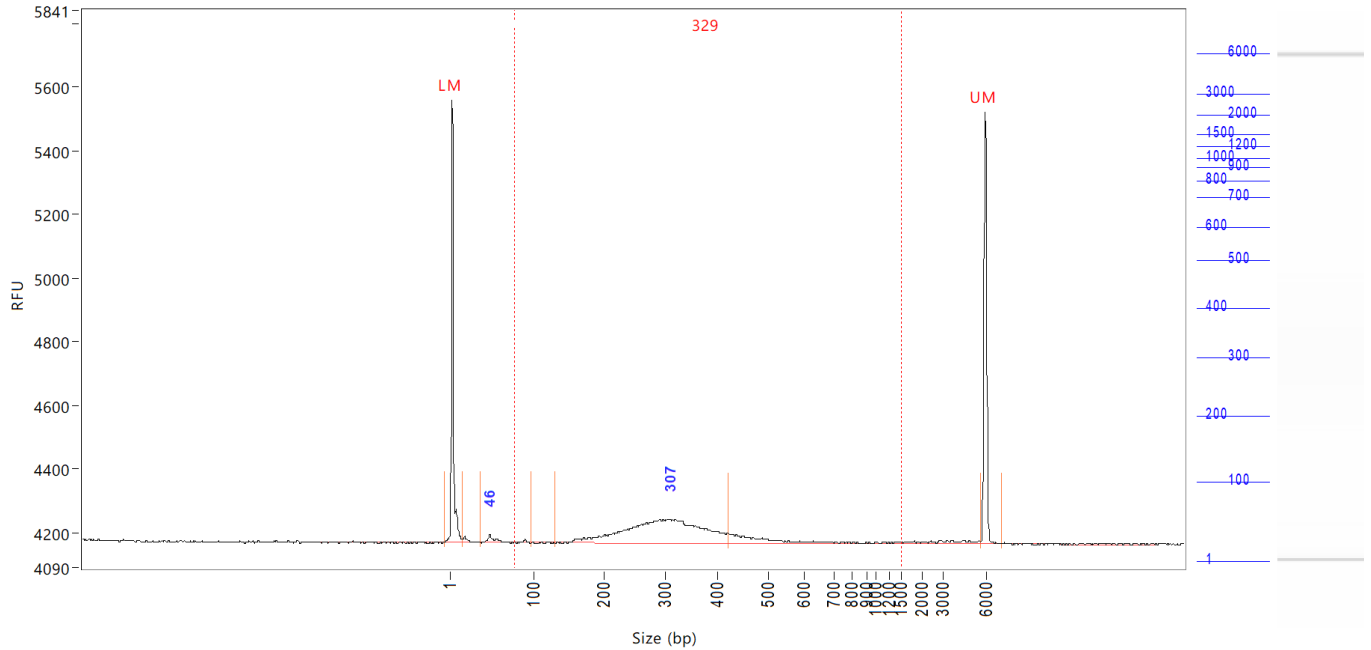

| Peak | Size (bp) | Conc. (ng/uL) | From (bp) | To (bp) | RFU  |
|------|-----------|---------------|-----------|---------|------|
| 1    | 1 (LM)    | 0.0124        | 0         | 14      | 1391 |
| 2    | 46        | 0.0095        | 36        | 95      | 27   |
| 3    | 307       | 0.2063        | 130       | 421     | 75   |
| 4    | 6000 (UM) | 0.0072        | 5695      | 7137    | 1359 |

TIC: 0.2158 ng/uL  
 TIM: 1.4363 nmole/L  
 Total Conc.: 0.2643 ng/uL

Smear Analysis      75 bp to 1500 bp      0.2416 ng/uL      91.4 %Total      1.2078 nmole/L      329 Avg. Size (b.p.)      41.34 %CV

Sample Peak Width (sec): 50      Sample Min Peak Height: 25      Sample Baseline V to V?: Y      Sample Baseline V to V pts: 3  
 Sample Filter: Binomial      # of Pts for Filter: 3      Sample Start Region (min): 0      Sample End Region (min): 50  
 Manual Baseline Start (min): 10      Manual Baseline End (min): 48  
 Marker Peak Width (sec): 5      Marker Min Peak Height: 200      Marker Baseline V to V?: Y      Marker Baseline V to V pts: 3  
 Lower Marker Selection: First Peak > 200 RFU      Upper Marker Selection: Last Peak > 200 RFU  
 Ladder Size (bp): 1, 100, 200, 300, 400, 500, 600, 700, 800, 900, 1000, 1200, 1500, 2000, 3000, 6000  
 Quantification Using: Ladder      Final Concentration (ng/uL): 0.0830      Dilution Factor: 12.0

Sample: 103613-001-024

Well Location: H3

Created: Friday, June 21, 2019 2:11:36 PM

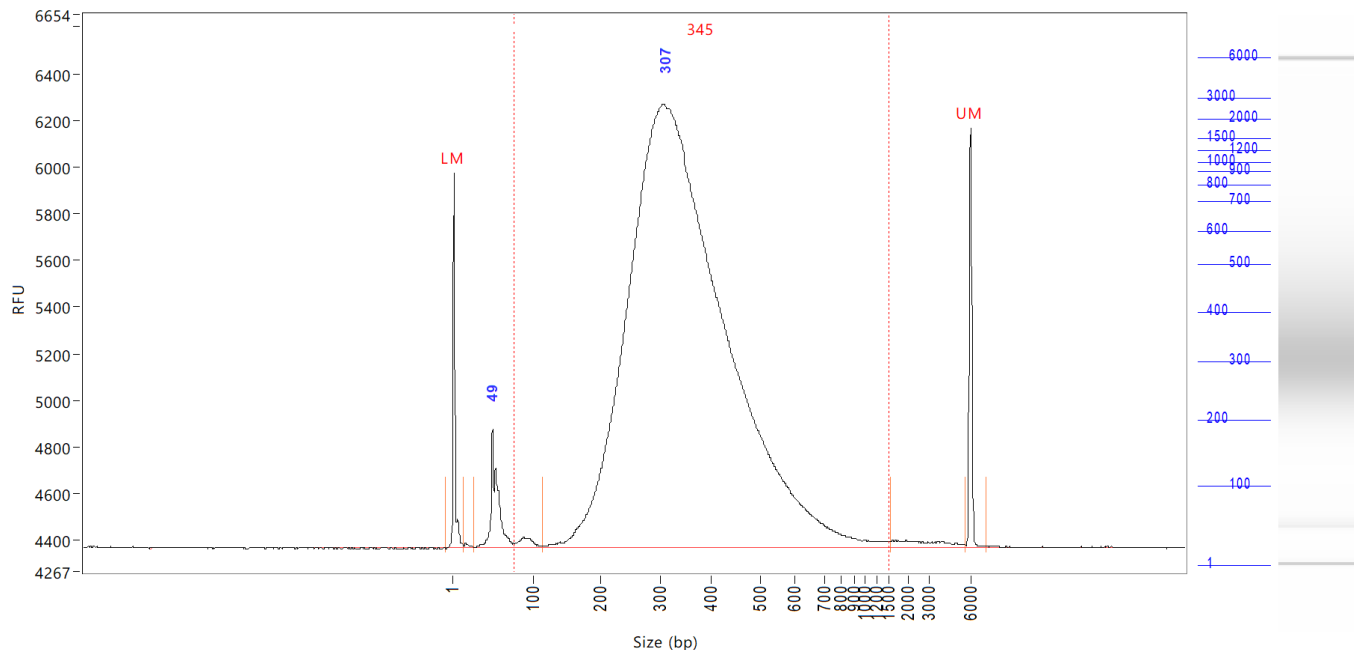

| Peak | Size (bp) | Conc. (ng/uL) | From (bp) | To (bp) | RFU  |
|------|-----------|---------------|-----------|---------|------|
| 1    | 1 (LM)    | 0.0124        | 0         | 14      | 1603 |
| 2    | 49        | 0.1714        | 26        | 113     | 508  |
| 3    | 307       | 5.4905        | 113       | 1554    | 1904 |
| 4    | 6000 (UM) | 0.0082        | 5670      | 7137    | 1799 |

TIC: 5.6619 ng/uL  
 TIM: 30.9484 nmole/L  
 Total Conc.: 5.6993 ng/uL

Smear Analysis      75 bp to 1500 bp      5.5147 ng/uL      96.8 %Total      26.3096 nmole/L      345 Avg. Size (b.p.)      32.86 %CV

Sample Peak Width (sec): 50      Sample Min Peak Height: 25      Sample Baseline V to V?: Y      Sample Baseline V to V pts: 3  
 Sample Filter: Binomial      # of Pts for Filter: 3      Sample Start Region (min): 0      Sample End Region (min): 50  
 Manual Baseline Start (min): 10      Manual Baseline End (min): 48  
 Marker Peak Width (sec): 5      Marker Min Peak Height: 200      Marker Baseline V to V?: Y      Marker Baseline V to V pts: 3  
 Lower Marker Selection: First Peak > 200 RFU      Upper Marker Selection: Last Peak > 200 RFU  
 Ladder Size (bp): 1, 100, 200, 300, 400, 500, 600, 700, 800, 900, 1000, 1200, 1500, 2000, 3000, 6000  
 Quantification Using: Ladder      Final Concentration (ng/uL): 0.0830      Dilution Factor: 12.0

**Sample:** 103613-001-025

**Well Location:** A4

**Created:** Friday, June 21, 2019 2:11:36 PM

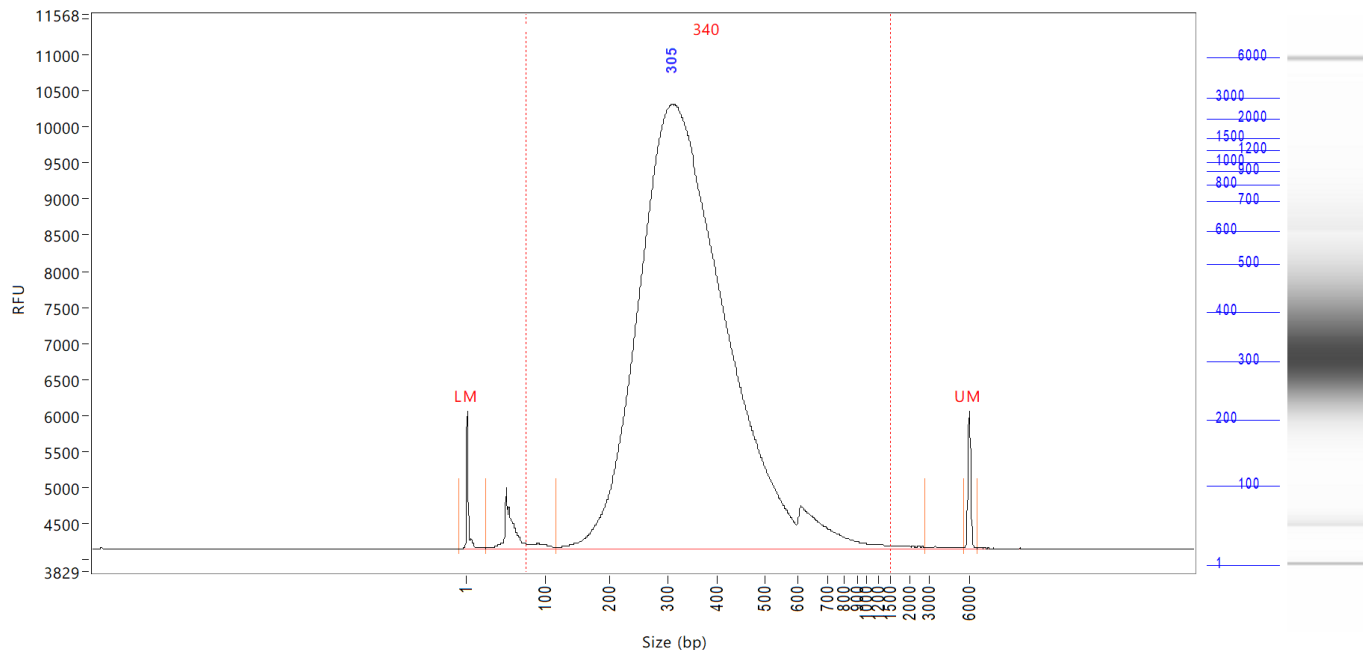

| Peak         | Size (bp) | Conc. (ng/uL) | From (bp) | To (bp) | RFU  |
|--------------|-----------|---------------|-----------|---------|------|
| 1            | 1 (LM)    | 0.0124        | 0         | 26      | 1904 |
| 2            | 305       | 13.5275       | 118       | 2800    | 6187 |
| 3            | 6000 (UM) | 0.0077        | 5619      | 6556    | 1914 |
| TIC:         |           | 13.5275       | ng/uL     |         |      |
| TIM:         |           | 64.8815       | nmole/L   |         |      |
| Total Conc.: |           | 13.8100       | ng/uL     |         |      |

Smear Analysis      75 bp to 1500 bp      13.5571 ng/uL      98.2 %Total      65.5244 nmole/L      340 Avg. Size (b.p.)      30.34 %CV

Sample Peak Width (sec): 50      Sample Min Peak Height: 25      Sample Baseline V to V?: Y      Sample Baseline V to V pts: 3  
 Sample Filter: Binomial      # of Pts for Filter: 3      Sample Start Region (min): 0      Sample End Region (min): 50  
 Manual Baseline Start (min): 10      Manual Baseline End (min): 48  
 Marker Peak Width (sec): 5      Marker Min Peak Height: 200      Marker Baseline V to V?: Y      Marker Baseline V to V pts: 3  
 Lower Marker Selection: First Peak > 200 RFU      Upper Marker Selection: Last Peak > 200 RFU  
 Ladder Size (bp): 1, 100, 200, 300, 400, 500, 600, 700, 800, 900, 1000, 1200, 1500, 2000, 3000, 6000  
 Quantification Using: Ladder      Final Concentration (ng/uL): 0.0830      Dilution Factor: 12.0

Sample: 103613-001-026

Well Location: B4

Created: Friday, June 21, 2019 2:11:36 PM

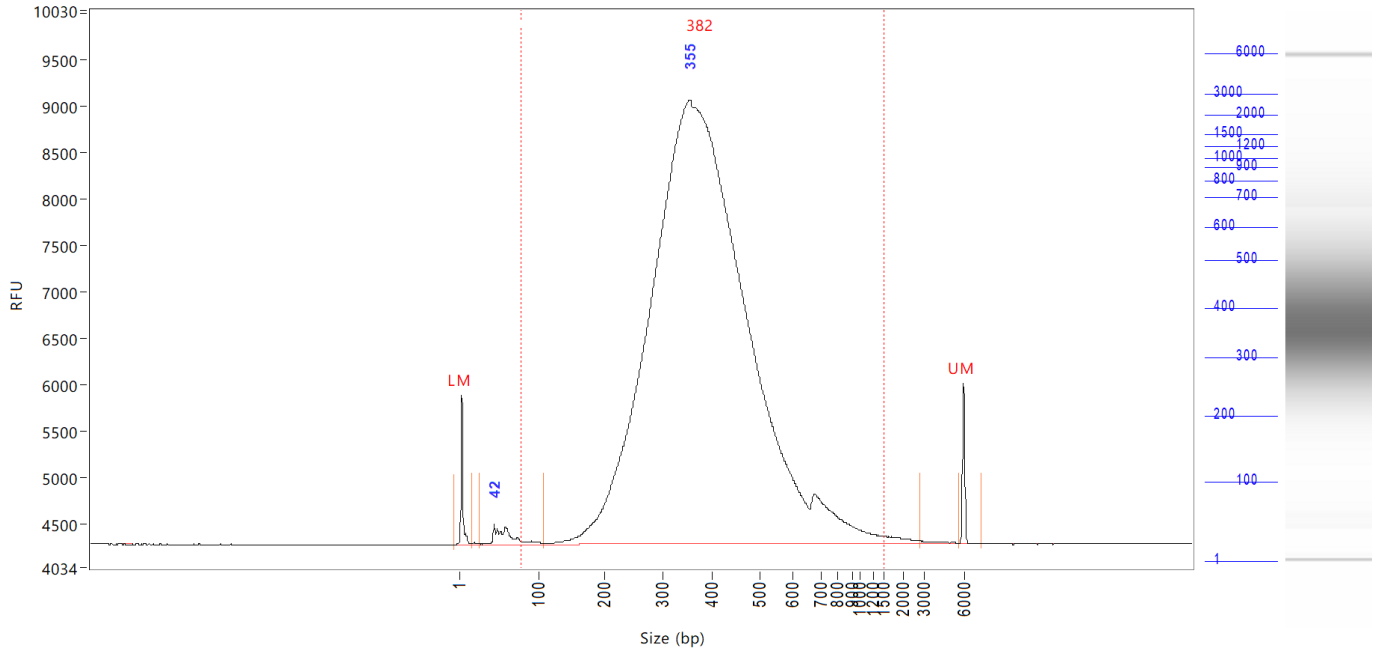

| Peak | Size (bp) | Conc. (ng/uL) | From (bp) | To (bp) | RFU  |
|------|-----------|---------------|-----------|---------|------|
| 1    | 1 (LM)    | 0.0124        | 0         | 15      | 1604 |
| 2    | 42        | 0.1406        | 25        | 108     | 215  |
| 3    | 355       | 13.7628       | 108       | 2817    | 4785 |
| 4    | 6000 (UM) | 0.0078        | 5670      | 7314    | 1721 |

TIC: 13.9033 ng/uL  
 TIM: 62.5661 nmole/L  
 Total Conc.: 13.9188 ng/uL

Smear Analysis      75 bp to 1500 bp      13.7441 ng/uL      98.7 %Total      59.2654 nmole/L      382 Avg. Size (b.p.)      31.42 %CV

Sample Peak Width (sec): 50      Sample Min Peak Height: 25      Sample Baseline V to V?: Y      Sample Baseline V to V pts: 3  
 Sample Filter: Binomial      # of Pts for Filter: 3      Sample Start Region (min): 0      Sample End Region (min): 50  
 Manual Baseline Start (min): 10      Manual Baseline End (min): 48  
 Marker Peak Width (sec): 5      Marker Min Peak Height: 200      Marker Baseline V to V?: Y      Marker Baseline V to V pts: 3  
 Lower Marker Selection: First Peak > 200 RFU      Upper Marker Selection: Last Peak > 200 RFU  
 Ladder Size (bp): 1, 100, 200, 300, 400, 500, 600, 700, 800, 900, 1000, 1200, 1500, 2000, 3000, 6000  
 Quantification Using: Ladder      Final Concentration (ng/uL): 0.0830      Dilution Factor: 12.0

Sample: 103613-001-027

Well Location: C4

Created: Friday, June 21, 2019 2:11:36 PM

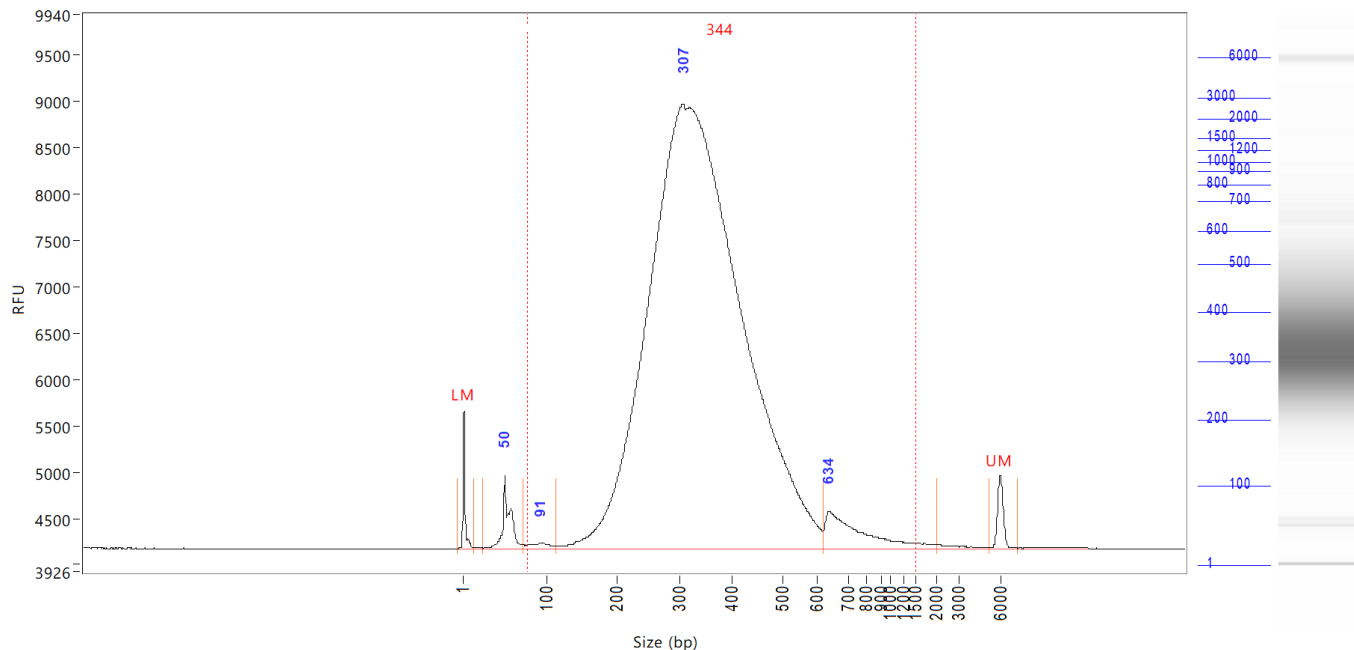

| Peak | Size (bp) | Conc. (ng/uL) | From (bp) | To (bp) | RFU  |
|------|-----------|---------------|-----------|---------|------|
| 1    | 1 (LM)    | 0.0124        | 0         | 15      | 1480 |
| 2    | 50        | 0.2453        | 23        | 72      | 788  |
| 3    | 91        | 0.0489        | 72        | 112     | 57   |
| 4    | 307       | 13.9253       | 112       | 618     | 4805 |
| 5    | 634       | 0.3637        | 618       | 2018    | 403  |
| 6    | 6000 (UM) | 0.0081        | 5187      | 7212    | 790  |

TIC: 14.5831 ng/uL  
 TIM: 77.9307 nmole/L  
 Total Conc.: 14.6074 ng/uL

Smear Analysis      75 bp to 1500 bp      14.3116 ng/ul      98.0 %Total      68.5172 nmole/L      344 Avg. Size (b.p.)      31.61 %CV

Sample Peak Width (sec): 50      Sample Min Peak Height: 25      Sample Baseline V to V?: Y      Sample Baseline V to V pts: 3  
 Sample Filter: Binomial      # of Pts for Filter: 3      Sample Start Region (min): 0      Sample End Region (min): 50  
 Manual Baseline Start (min): 10      Manual Baseline End (min): 48  
 Marker Peak Width (sec): 5      Marker Min Peak Height: 200      Marker Baseline V to V?: Y      Marker Baseline V to V pts: 3  
 Lower Marker Selection: First Peak > 200 RFU      Upper Marker Selection: Last Peak > 200 RFU  
 Ladder Size (bp): 1, 100, 200, 300, 400, 500, 600, 700, 800, 900, 1000, 1200, 1500, 2000, 3000, 6000  
 Quantification Using: Ladder      Final Concentration (ng/uL): 0.0830      Dilution Factor: 12.0



Sample: 103613-001-028

Well Location: D4

Created: Friday, June 21, 2019 2:11:36 PM

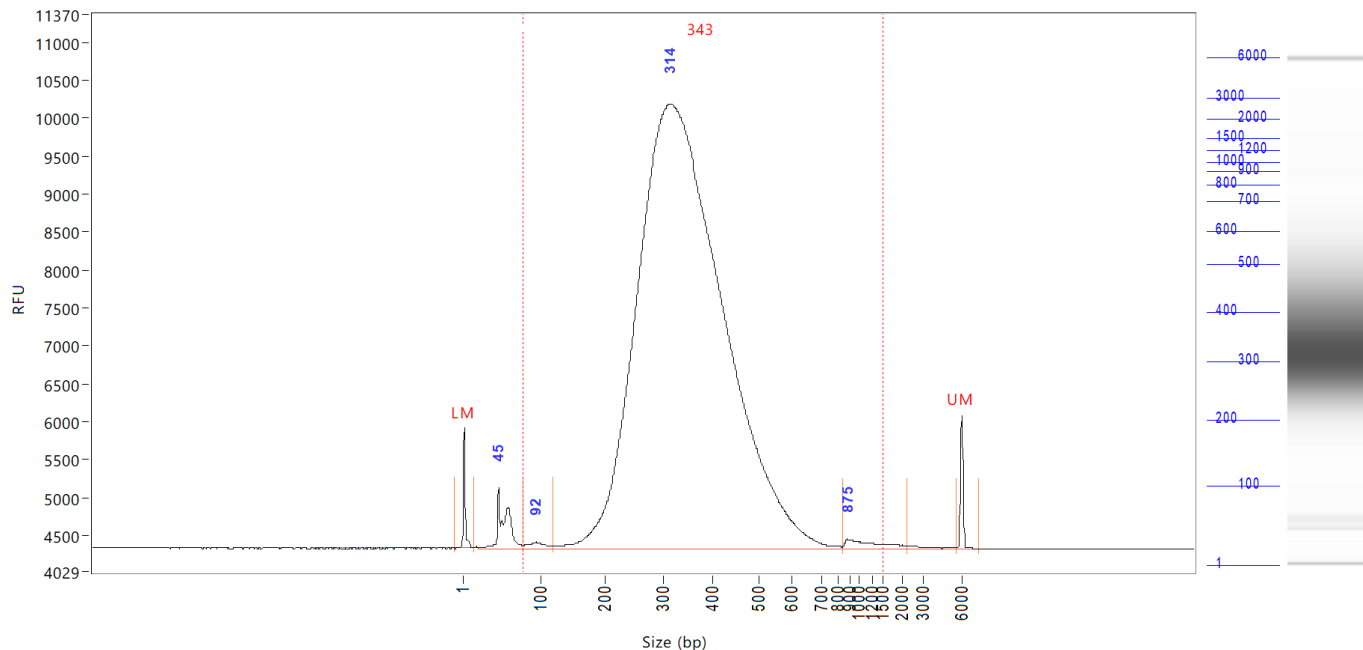

| Peak | Size (bp) | Conc. (ng/uL) | From (bp) | To (bp) | RFU  |
|------|-----------|---------------|-----------|---------|------|
| 1    | 1 (LM)    | 0.0124        | 0         | 15      | 1588 |
| 2    | 45        | 0.3057        | 15        | 78      | 800  |
| 3    | 92        | 0.0550        | 78        | 120     | 80   |
| 4    | 314       | 15.5094       | 120       | 839     | 5863 |
| 5    | 875       | 0.0859        | 839       | 2284    | 122  |
| 6    | 6000 (UM) | 0.0082        | 5644      | 7314    | 1753 |

TIC: 15.9560 ng/uL  
 TIM: 85.3360 nmole/L  
 Total Conc.: 15.9689 ng/uL

Smear Analysis      75 bp to 1500 bp      15.6301 ng/uL      97.9 %Total      74.9245 nmole/L      343 Avg. Size (b.p.)      28.18 %CV

Sample Peak Width (sec): 50      Sample Min Peak Height: 25      Sample Baseline V to V?: Y      Sample Baseline V to V pts: 3  
 Sample Filter: Binomial      # of Pts for Filter: 3      Sample Start Region (min): 0      Sample End Region (min): 50  
 Manual Baseline Start (min): 10      Manual Baseline End (min): 48  
 Marker Peak Width (sec): 5      Marker Min Peak Height: 200      Marker Baseline V to V?: Y      Marker Baseline V to V pts: 3  
 Lower Marker Selection: First Peak > 200 RFU      Upper Marker Selection: Last Peak > 200 RFU  
 Ladder Size (bp): 1, 100, 200, 300, 400, 500, 600, 700, 800, 900, 1000, 1200, 1500, 2000, 3000, 6000  
 Quantification Using: Ladder      Final Concentration (ng/uL): 0.0830      Dilution Factor: 12.0

Sample: 103613-001-029

Well Location: E4

Created: Friday, June 21, 2019 2:11:36 PM

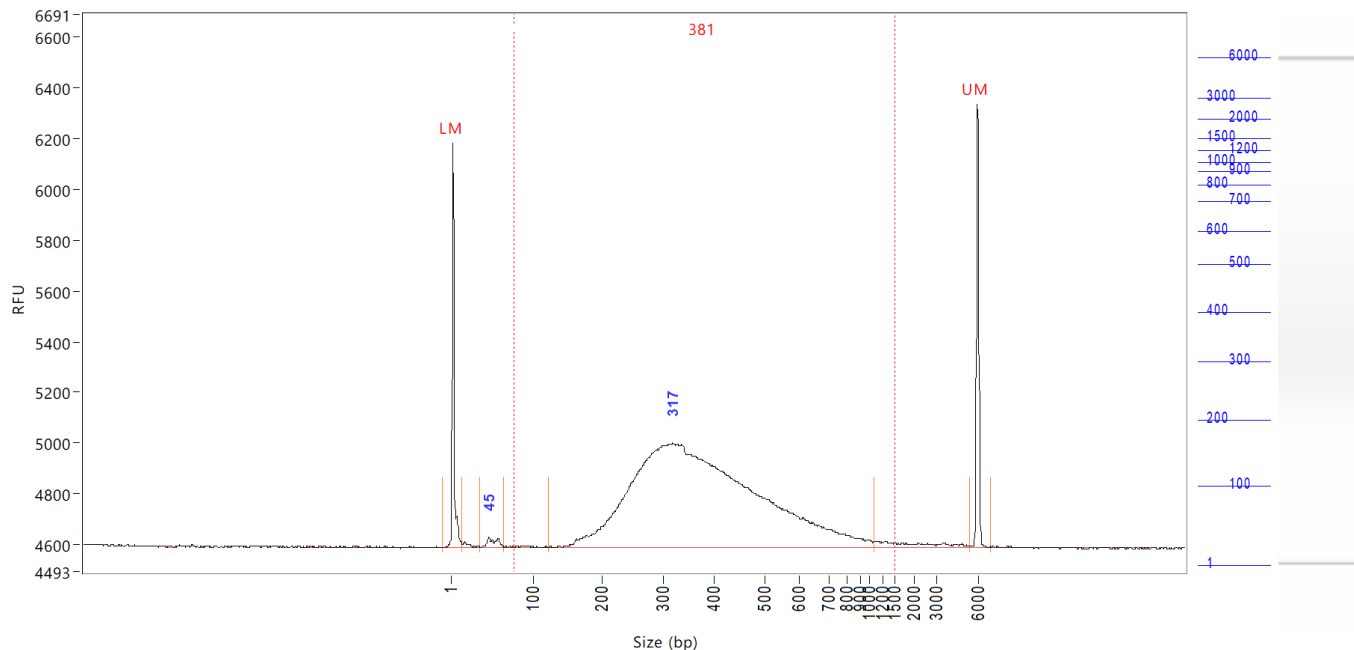

| Peak         | Size (bp) | Conc. (ng/uL) | From (bp) | To (bp) | RFU  |
|--------------|-----------|---------------|-----------|---------|------|
| 1            | 1 (LM)    | 0.0124        | 0         | 13      | 1595 |
| 2            | 45        | 0.0160        | 35        | 64      | 39   |
| 3            | 317       | 1.4652        | 122       | 1073    | 410  |
| 4            | 6000 (UM) | 0.0078        | 5441      | 6985    | 1753 |
| TIC:         |           | 1.4813        | ng/uL     |         |      |
| TIM:         |           | 6.9195        | nmole/L   |         |      |
| Total Conc.: |           | 1.5152        | ng/uL     |         |      |

Smear Analysis      75 bp to 1500 bp      1.4755 ng/uL      97.4 %Total      6.3775 nmole/L      381 Avg. Size (b.p.)      38.86 %CV

Sample Peak Width (sec): 50      Sample Min Peak Height: 25      Sample Baseline V to V?: Y      Sample Baseline V to V pts: 3  
 Sample Filter: Binomial      # of Pts for Filter: 3      Sample Start Region (min): 0      Sample End Region (min): 50  
 Manual Baseline Start (min): 10      Manual Baseline End (min): 48  
 Marker Peak Width (sec): 5      Marker Min Peak Height: 200      Marker Baseline V to V?: Y      Marker Baseline V to V pts: 3  
 Lower Marker Selection: First Peak > 200 RFU      Upper Marker Selection: Last Peak > 200 RFU  
 Ladder Size (bp): 1, 100, 200, 300, 400, 500, 600, 700, 800, 900, 1000, 1200, 1500, 2000, 3000, 6000  
 Quantification Using: Ladder      Final Concentration (ng/uL): 0.0830      Dilution Factor: 12.0

Sample: 103613-001-030

Well Location: F4

Created: Friday, June 21, 2019 2:11:36 PM

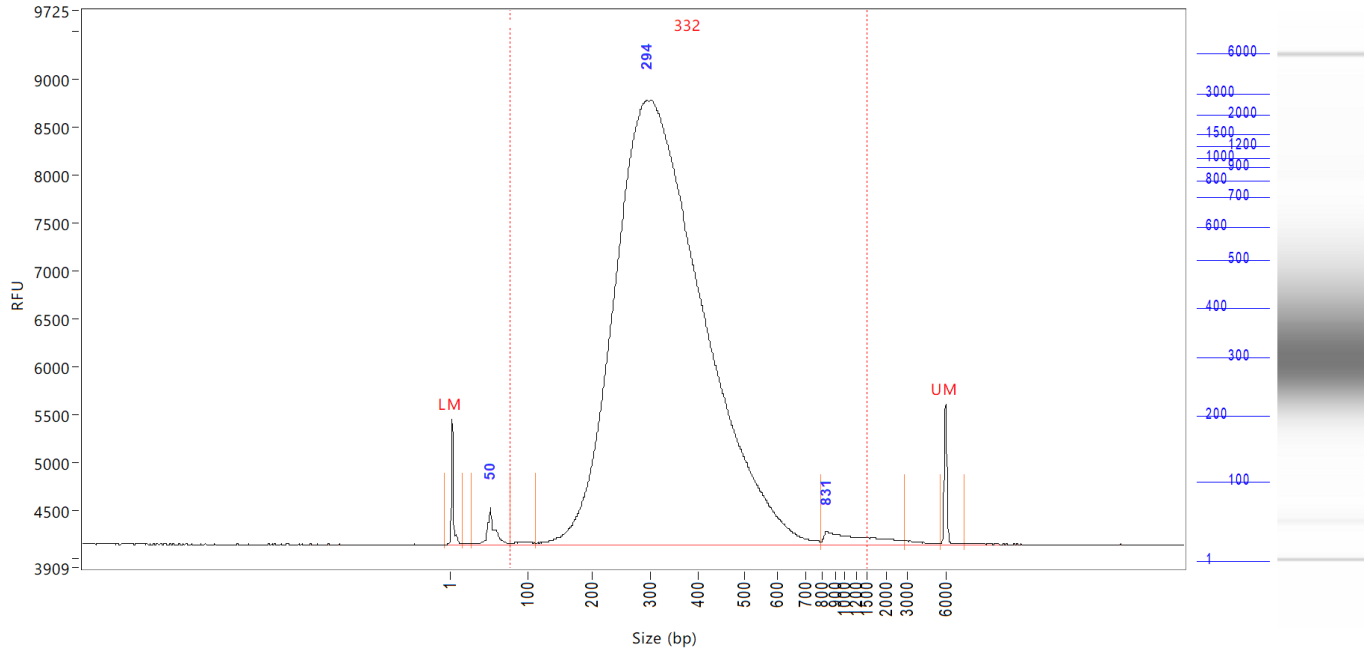

| Peak | Size (bp) | Conc. (ng/uL) | From (bp) | To (bp) | RFU  |
|------|-----------|---------------|-----------|---------|------|
| 1    | 1 (LM)    | 0.0124        | 0         | 15      | 1313 |
| 2    | 50        | 0.1378        | 28        | 76      | 389  |
| 3    | 294       | 15.5056       | 112       | 790     | 4646 |
| 4    | 831       | 0.1567        | 790       | 2950    | 134  |
| 5    | 6000 (UM) | 0.0088        | 5670      | 7440    | 1474 |

TIC: 15.8001 ng/uL  
 TIM: 82.3007 nmole/L  
 Total Conc.: 15.8446 ng/uL

Smear Analysis      75 bp to 1500 bp      15.6345 ng/uL      98.7 %Total      77.3686 nmole/L      332 Avg. Size (b.p.)      31.44 %CV

Sample Peak Width (sec): 50      Sample Min Peak Height: 25      Sample Baseline V to V?: Y      Sample Baseline V to V pts: 3  
 Sample Filter: Binomial      # of Pts for Filter: 3      Sample Start Region (min): 0      Sample End Region (min): 50  
 Manual Baseline Start (min): 10      Manual Baseline End (min): 48  
 Marker Peak Width (sec): 5      Marker Min Peak Height: 200      Marker Baseline V to V?: Y      Marker Baseline V to V pts: 3  
 Lower Marker Selection: First Peak > 200 RFU      Upper Marker Selection: Last Peak > 200 RFU  
 Ladder Size (bp): 1, 100, 200, 300, 400, 500, 600, 700, 800, 900, 1000, 1200, 1500, 2000, 3000, 6000  
 Quantification Using: Ladder      Final Concentration (ng/uL): 0.0830      Dilution Factor: 12.0

Sample: 103613-001-031

Well Location: G4

Created: Friday, June 21, 2019 2:11:36 PM

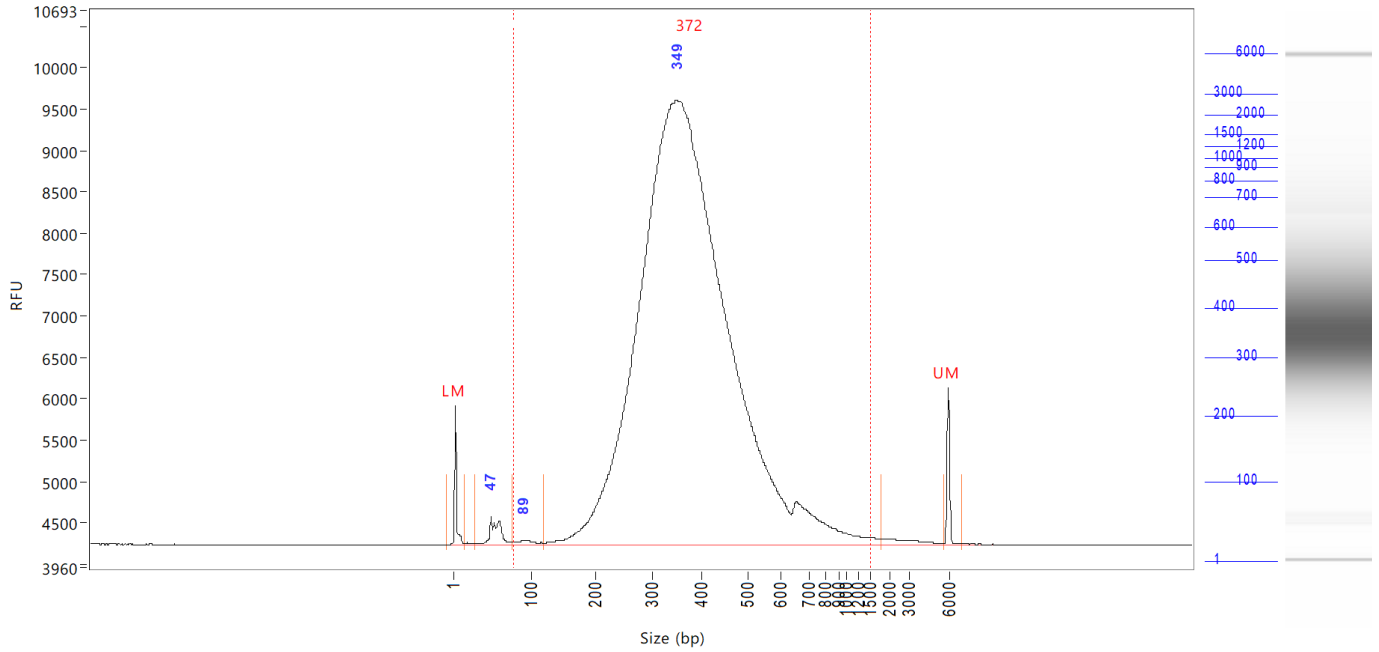

| Peak | Size (bp) | Conc. (ng/uL) | From (bp) | To (bp) | RFU  |
|------|-----------|---------------|-----------|---------|------|
| 1    | 1 (LM)    | 0.0124        | 0         | 14      | 1687 |
| 2    | 47        | 0.1357        | 28        | 74      | 343  |
| 3    | 89        | 0.0373        | 74        | 119     | 51   |
| 4    | 349       | 13.4853       | 119       | 1786    | 5381 |
| 5    | 6000 (UM) | 0.0084        | 5670      | 7036    | 1892 |

TIC: 13.6582 ng/uL  
 TIM: 64.1725 nmole/L  
 Total Conc.: 13.7133 ng/uL

Smear Analysis      75 bp to 1500 bp      13.5056 ng/uL      98.5 %Total      59.7031 nmole/L      372 Avg. Size (b.p.)      30.96 %CV

Sample Peak Width (sec): 50      Sample Min Peak Height: 25      Sample Baseline V to V?: Y      Sample Baseline V to V pts: 3  
 Sample Filter: Binomial      # of Pts for Filter: 3      Sample Start Region (min): 0      Sample End Region (min): 50  
 Manual Baseline Start (min): 10      Manual Baseline End (min): 48  
 Marker Peak Width (sec): 5      Marker Min Peak Height: 200      Marker Baseline V to V?: Y      Marker Baseline V to V pts: 3  
 Lower Marker Selection: First Peak > 200 RFU      Upper Marker Selection: Last Peak > 200 RFU  
 Ladder Size (bp): 1, 100, 200, 300, 400, 500, 600, 700, 800, 900, 1000, 1200, 1500, 2000, 3000, 6000  
 Quantification Using: Ladder      Final Concentration (ng/uL): 0.0830      Dilution Factor: 12.0

Sample: 103613-001-032

Well Location: H4

Created: Friday, June 21, 2019 2:11:36 PM

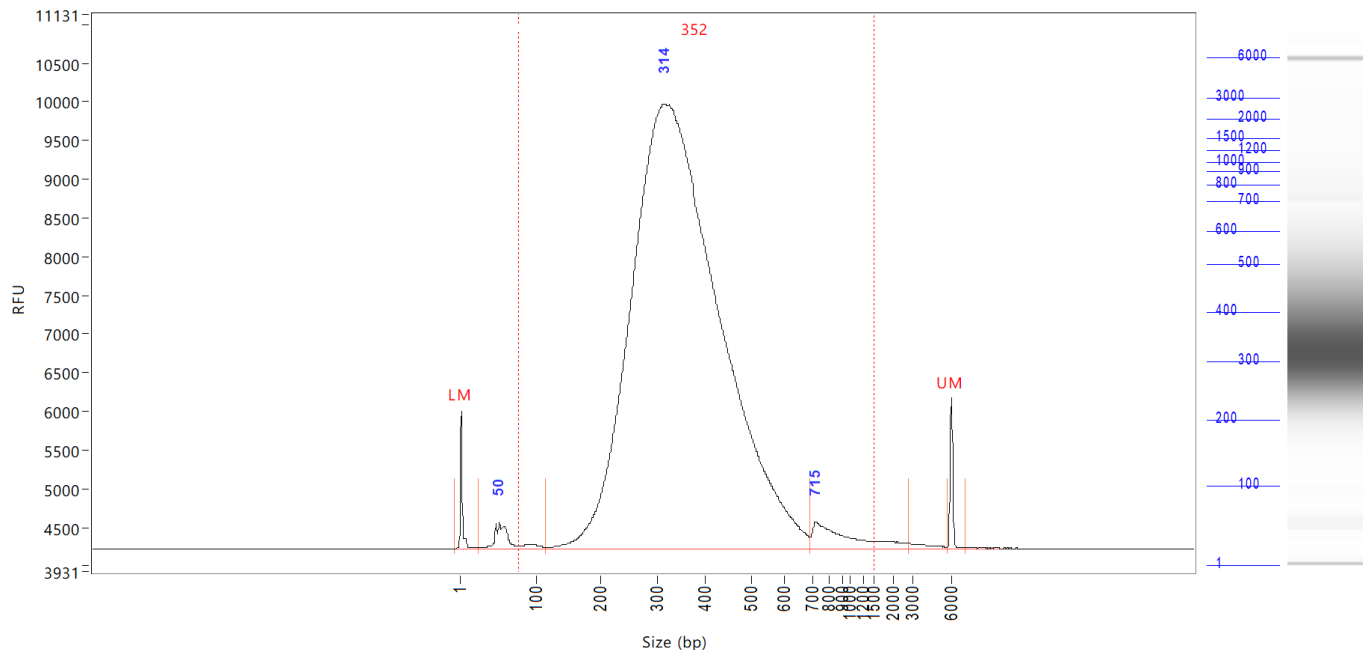

| Peak | Size (bp) | Conc. (ng/uL) | From (bp) | To (bp) | RFU  |
|------|-----------|---------------|-----------|---------|------|
| 1    | 1 (LM)    | 0.0124        | 0         | 25      | 1769 |
| 2    | 50        | 0.1864        | 25        | 114     | 340  |
| 3    | 314       | 13.7736       | 114       | 691     | 5754 |
| 4    | 715       | 0.2702        | 691       | 2800    | 343  |
| 5    | 6000 (UM) | 0.0083        | 5670      | 7010    | 1959 |

TIC: 14.2303 ng/uL  
 TIM: 71.3674 nmole/L  
 Total Conc.: 14.2572 ng/uL

Smear Analysis      75 bp to 1500 bp      14.0271 ng/uL      98.4 %Total      65.5659 nmole/L      352 Avg. Size (b.p.)      32.13 %CV

Sample Peak Width (sec): 50      Sample Min Peak Height: 25      Sample Baseline V to V?: Y      Sample Baseline V to V pts: 3  
 Sample Filter: Binomial      # of Pts for Filter: 3      Sample Start Region (min): 0      Sample End Region (min): 50  
 Manual Baseline Start (min): 10      Manual Baseline End (min): 48  
 Marker Peak Width (sec): 5      Marker Min Peak Height: 200      Marker Baseline V to V?: Y      Marker Baseline V to V pts: 3  
 Lower Marker Selection: First Peak > 200 RFU      Upper Marker Selection: Last Peak > 200 RFU  
 Ladder Size (bp): 1, 100, 200, 300, 400, 500, 600, 700, 800, 900, 1000, 1200, 1500, 2000, 3000, 6000  
 Quantification Using: Ladder      Final Concentration (ng/uL): 0.0830      Dilution Factor: 12.0

Sample: 103613-001-033

Well Location: A5

Created: Friday, June 21, 2019 2:11:36 PM

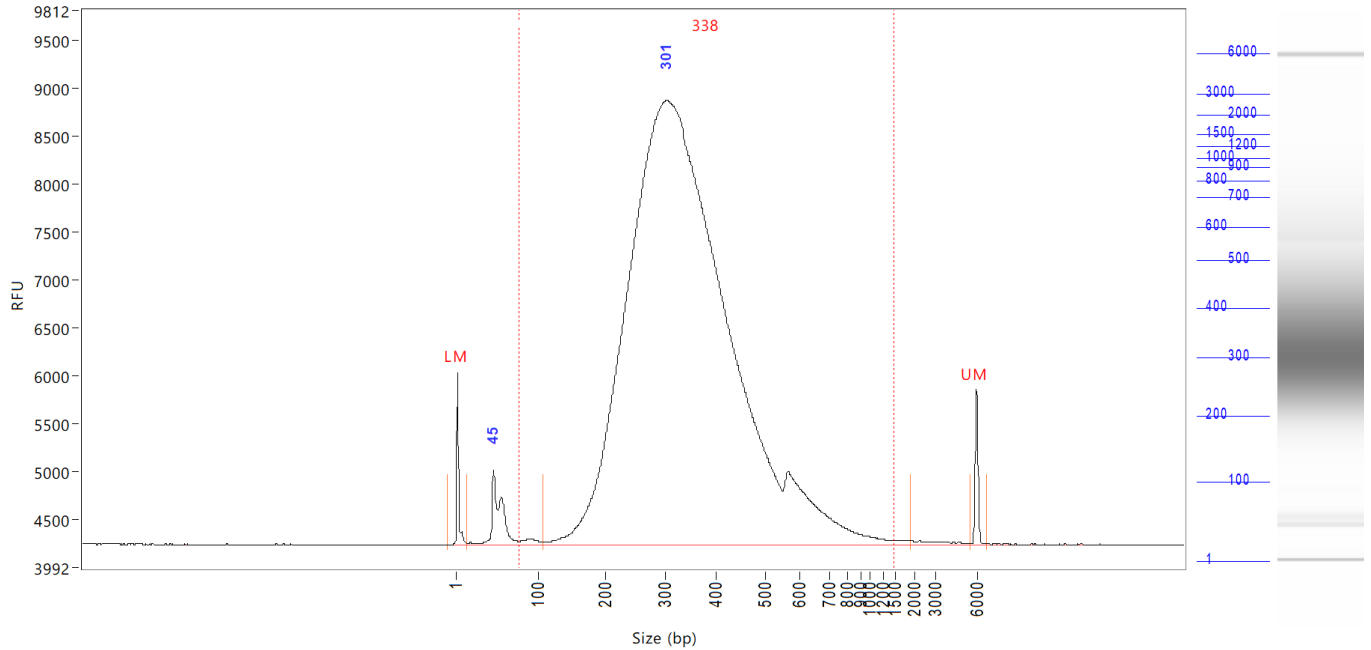

| Peak | Size (bp) | Conc. (ng/uL) | From (bp) | To (bp) | RFU  |
|------|-----------|---------------|-----------|---------|------|
| 1    | 1 (LM)    | 0.0124        | 0         | 15      | 1796 |
| 2    | 45        | 0.3060        | 15        | 109     | 774  |
| 3    | 301       | 12.6586       | 109       | 1902    | 4649 |
| 4    | 6000 (UM) | 0.0078        | 5517      | 6733    | 1627 |

TIC: 12.9646 ng/uL  
 TIM: 70.5476 nmole/L  
 Total Conc.: 12.9903 ng/uL

Smear Analysis      75 bp to 1500 bp      12.6814 ng/uL      97.6 %Total      61.7849 nmole/L      338 Avg. Size (b.p.)      33.28 %CV

Sample Peak Width (sec): 50      Sample Min Peak Height: 25      Sample Baseline V to V?: Y      Sample Baseline V to V pts: 3  
 Sample Filter: Binomial      # of Pts for Filter: 3      Sample Start Region (min): 0      Sample End Region (min): 50  
 Manual Baseline Start (min): 10      Manual Baseline End (min): 48  
 Marker Peak Width (sec): 5      Marker Min Peak Height: 200      Marker Baseline V to V?: Y      Marker Baseline V to V pts: 3  
 Lower Marker Selection: First Peak > 200 RFU      Upper Marker Selection: Last Peak > 200 RFU  
 Ladder Size (bp): 1, 100, 200, 300, 400, 500, 600, 700, 800, 900, 1000, 1200, 1500, 2000, 3000, 6000  
 Quantification Using: Ladder      Final Concentration (ng/uL): 0.0830      Dilution Factor: 12.0

Sample: 103613-001-034

Well Location: B5

Created: Friday, June 21, 2019 2:11:36 PM

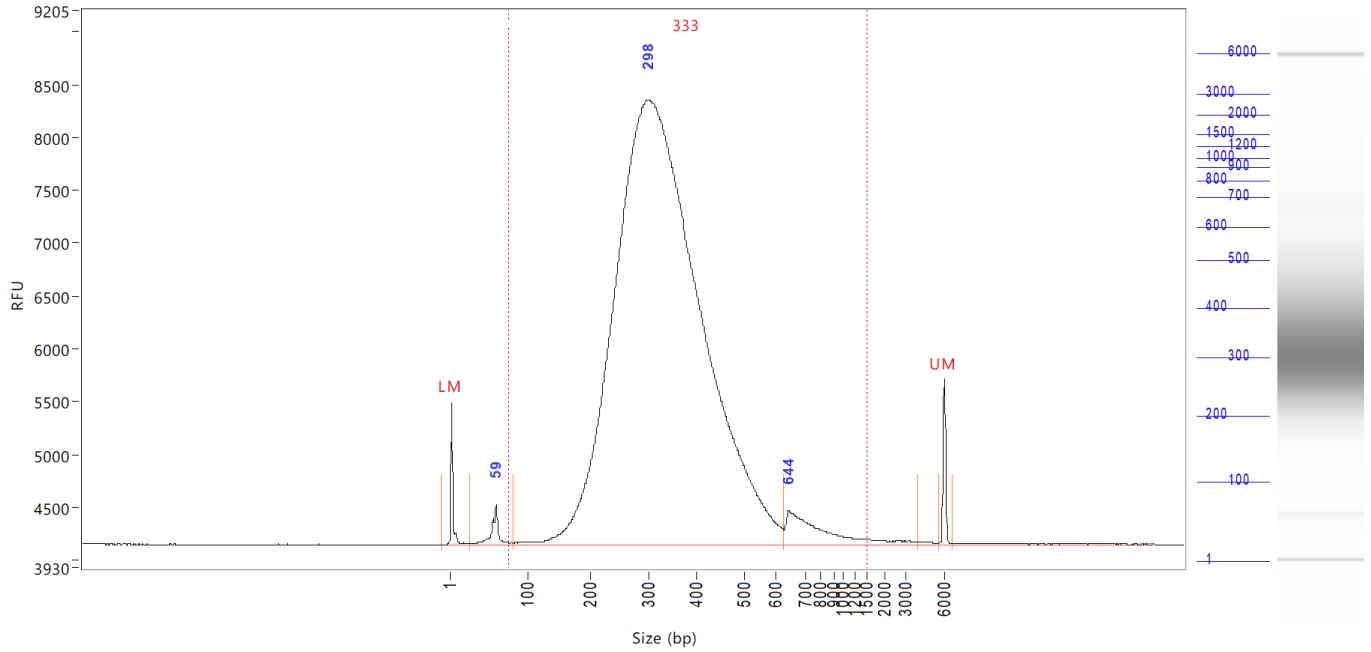

| Peak | Size (bp) | Conc. (ng/uL) | From (bp) | To (bp) | RFU  |
|------|-----------|---------------|-----------|---------|------|
| 1    | 1 (LM)    | 0.0124        | 0         | 26      | 1340 |
| 2    | 59        | 0.1187        | 26        | 81      | 375  |
| 3    | 298       | 12.7700       | 81        | 625     | 4215 |
| 4    | 644       | 0.3218        | 625       | 3992    | 323  |
| 5    | 6000 (UM) | 0.0084        | 5543      | 6657    | 1569 |

TIC: 13.2105 ng/uL  
 TIM: 69.0622 nmole/L  
 Total Conc.: 13.2168 ng/uL

Smear Analysis      75 bp to 1500 bp      13.0564 ng/uL      98.8 %Total      64.4834 nmole/L      333 Avg. Size (b.p.)      32.40 %CV

Sample Peak Width (sec): 50      Sample Min Peak Height: 25      Sample Baseline V to V?: Y      Sample Baseline V to V pts: 3  
 Sample Filter: Binomial      # of Pts for Filter: 3      Sample Start Region (min): 0      Sample End Region (min): 50  
 Manual Baseline Start (min): 10      Manual Baseline End (min): 48  
 Marker Peak Width (sec): 5      Marker Min Peak Height: 200      Marker Baseline V to V?: Y      Marker Baseline V to V pts: 3  
 Lower Marker Selection: First Peak > 200 RFU      Upper Marker Selection: Last Peak > 200 RFU  
 Ladder Size (bp): 1, 100, 200, 300, 400, 500, 600, 700, 800, 900, 1000, 1200, 1500, 2000, 3000, 6000  
 Quantification Using: Ladder      Final Concentration (ng/uL): 0.0830      Dilution Factor: 12.0

Sample: 103613-001-035

Well Location: C5

Created: Friday, June 21, 2019 2:11:36 PM

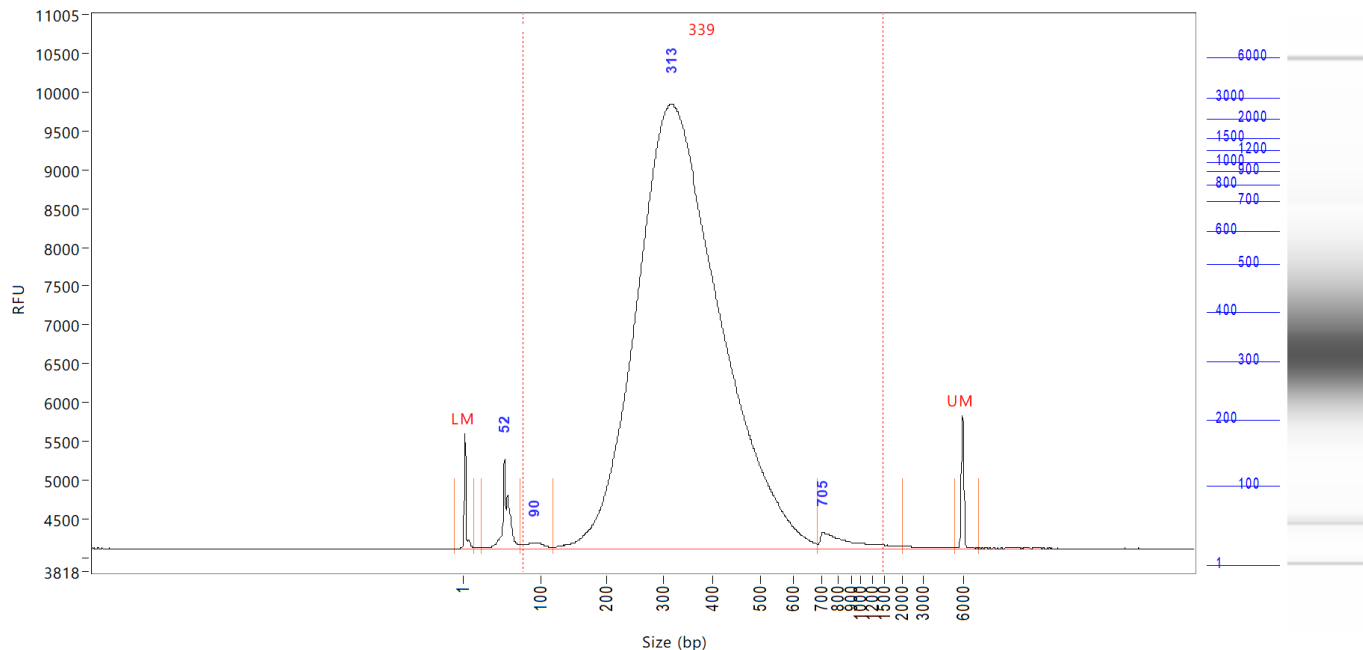

| Peak | Size (bp) | Conc. (ng/uL) | From (bp) | To (bp) | RFU  |
|------|-----------|---------------|-----------|---------|------|
| 1    | 1 (LM)    | 0.0124        | 0         | 15      | 1479 |
| 2    | 52        | 0.3087        | 24        | 73      | 1148 |
| 3    | 90        | 0.0639        | 73        | 118     | 74   |
| 4    | 313       | 15.5073       | 118       | 687     | 5744 |
| 5    | 705       | 0.1616        | 687       | 2001    | 214  |
| 6    | 6000 (UM) | 0.0085        | 5466      | 7288    | 1711 |

TIC: 16.0415 ng/uL  
 TIM: 86.9515 nmole/L  
 Total Conc.: 16.0631 ng/uL

Smear Analysis      75 bp to 1500 bp      15.7135 ng/ul      97.8 %Total      76.2512 nmole/L      339 Avg. Size (b.p.)      29.22 %CV

Sample Peak Width (sec): 50      Sample Min Peak Height: 25      Sample Baseline V to V?: Y      Sample Baseline V to V pts: 3  
 Sample Filter: Binomial      # of Pts for Filter: 3      Sample Start Region (min): 0      Sample End Region (min): 50  
 Manual Baseline Start (min): 10      Manual Baseline End (min): 48  
 Marker Peak Width (sec): 5      Marker Min Peak Height: 200      Marker Baseline V to V?: Y      Marker Baseline V to V pts: 3  
 Lower Marker Selection: First Peak > 200 RFU      Upper Marker Selection: Last Peak > 200 RFU  
 Ladder Size (bp): 1, 100, 200, 300, 400, 500, 600, 700, 800, 900, 1000, 1200, 1500, 2000, 3000, 6000  
 Quantification Using: Ladder      Final Concentration (ng/uL): 0.0830      Dilution Factor: 12.0



Sample: 103613-001-036

Well Location: D5

Created: Friday, June 21, 2019 2:11:36 PM

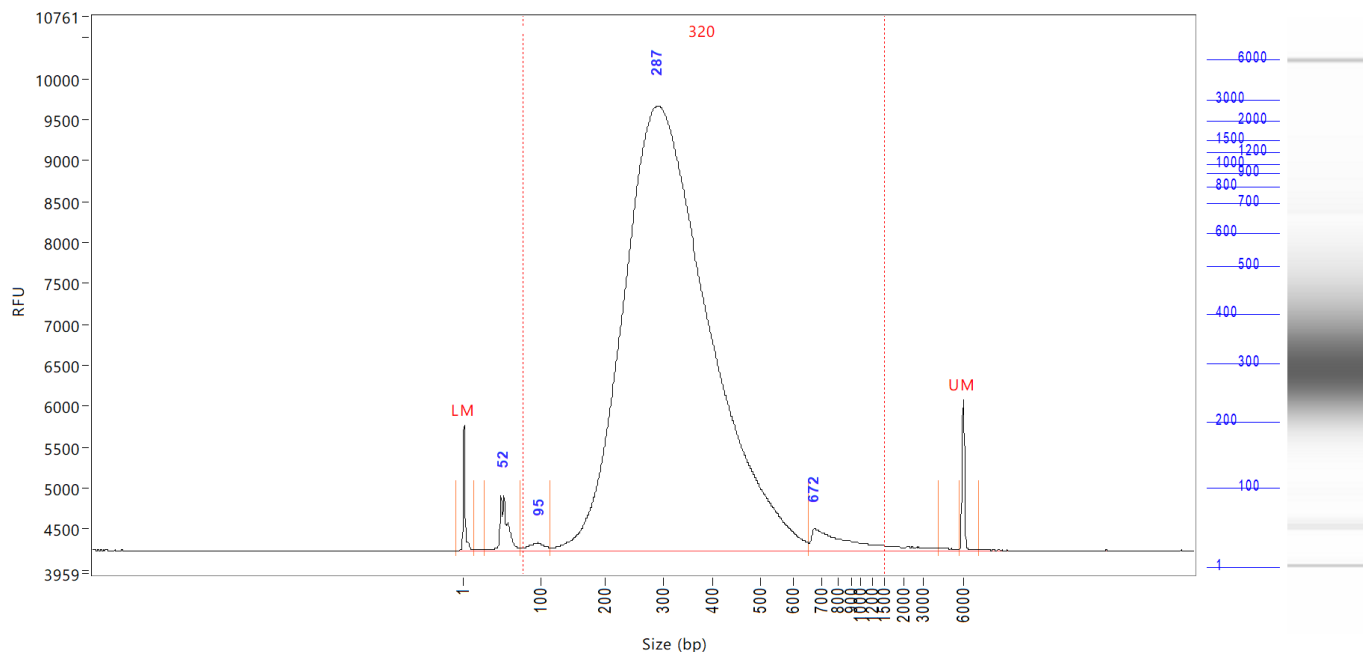

| Peak | Size (bp) | Conc. (ng/uL) | From (bp) | To (bp) | RFU  |
|------|-----------|---------------|-----------|---------|------|
| 1    | 1 (LM)    | 0.0124        | 0         | 15      | 1536 |
| 2    | 52        | 0.2259        | 29        | 73      | 676  |
| 3    | 95        | 0.0679        | 73        | 114     | 97   |
| 4    | 287       | 15.0670       | 114       | 655     | 5435 |
| 5    | 672       | 0.2621        | 655       | 4145    | 266  |
| 6    | 6000 (UM) | 0.0091        | 5670      | 7162    | 1833 |

TIC: 15.6229 ng/uL  
 TIM: 87.5097 nmole/L  
 Total Conc.: 15.6350 ng/uL

Smear Analysis      75 bp to 1500 bp      15.3500 ng/uL      98.2 %Total      78.8659 nmole/L      320 Avg. Size (b.p.)      32.82 %CV

Sample Peak Width (sec): 50      Sample Min Peak Height: 25      Sample Baseline V to V?: Y      Sample Baseline V to V pts: 3  
 Sample Filter: Binomial      # of Pts for Filter: 3      Sample Start Region (min): 0      Sample End Region (min): 50  
 Manual Baseline Start (min): 10      Manual Baseline End (min): 48  
 Marker Peak Width (sec): 5      Marker Min Peak Height: 200      Marker Baseline V to V?: Y      Marker Baseline V to V pts: 3  
 Lower Marker Selection: First Peak > 200 RFU      Upper Marker Selection: Last Peak > 200 RFU  
 Ladder Size (bp): 1, 100, 200, 300, 400, 500, 600, 700, 800, 900, 1000, 1200, 1500, 2000, 3000, 6000  
 Quantification Using: Ladder      Final Concentration (ng/uL): 0.0830      Dilution Factor: 12.0

Sample: 103613-001-037

Well Location: E5

Created: Friday, June 21, 2019 2:11:36 PM

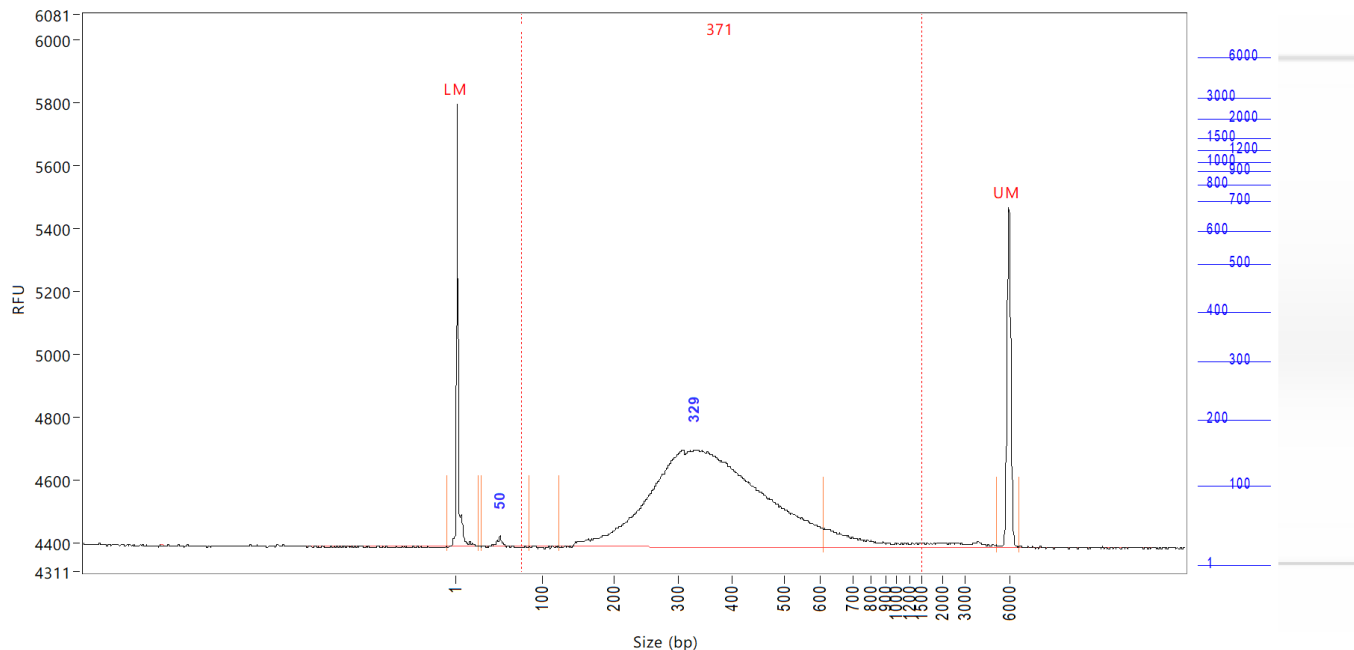

| Peak         | Size (bp) | Conc. (ng/uL) | From (bp) | To (bp) | RFU  |
|--------------|-----------|---------------|-----------|---------|------|
| 1            | 1 (LM)    | 0.0124        | 0         | 26      | 1407 |
| 2            | 50        | 0.0070        | 29        | 84      | 33   |
| 3            | 329       | 1.0986        | 124       | 609     | 309  |
| 4            | 6000 (UM) | 0.0074        | 5187      | 6707    | 1081 |
| TIC:         |           | 1.1055        | ng/uL     |         |      |
| TIM:         |           | 5.3528        | nmole/L   |         |      |
| Total Conc.: |           | 1.1749        | ng/uL     |         |      |

Smear Analysis      75 bp to 1500 bp      1.1505 ng/uL      97.9 %Total      5.0965 nmole/L      371 Avg. Size (b.p.)      35.66 %CV

Sample Peak Width (sec): 50      Sample Min Peak Height: 25      Sample Baseline V to V?: Y      Sample Baseline V to V pts: 3  
 Sample Filter: Binomial      # of Pts for Filter: 3      Sample Start Region (min): 0      Sample End Region (min): 50  
 Manual Baseline Start (min): 10      Manual Baseline End (min): 48  
 Marker Peak Width (sec): 5      Marker Min Peak Height: 200      Marker Baseline V to V?: Y      Marker Baseline V to V pts: 3  
 Lower Marker Selection: First Peak > 200 RFU      Upper Marker Selection: Last Peak > 200 RFU  
 Ladder Size (bp): 1, 100, 200, 300, 400, 500, 600, 700, 800, 900, 1000, 1200, 1500, 2000, 3000, 6000  
 Quantification Using: Ladder      Final Concentration (ng/uL): 0.0830      Dilution Factor: 12.0

Sample: 103613-001-038

Well Location: F5

Created: Friday, June 21, 2019 2:11:36 PM

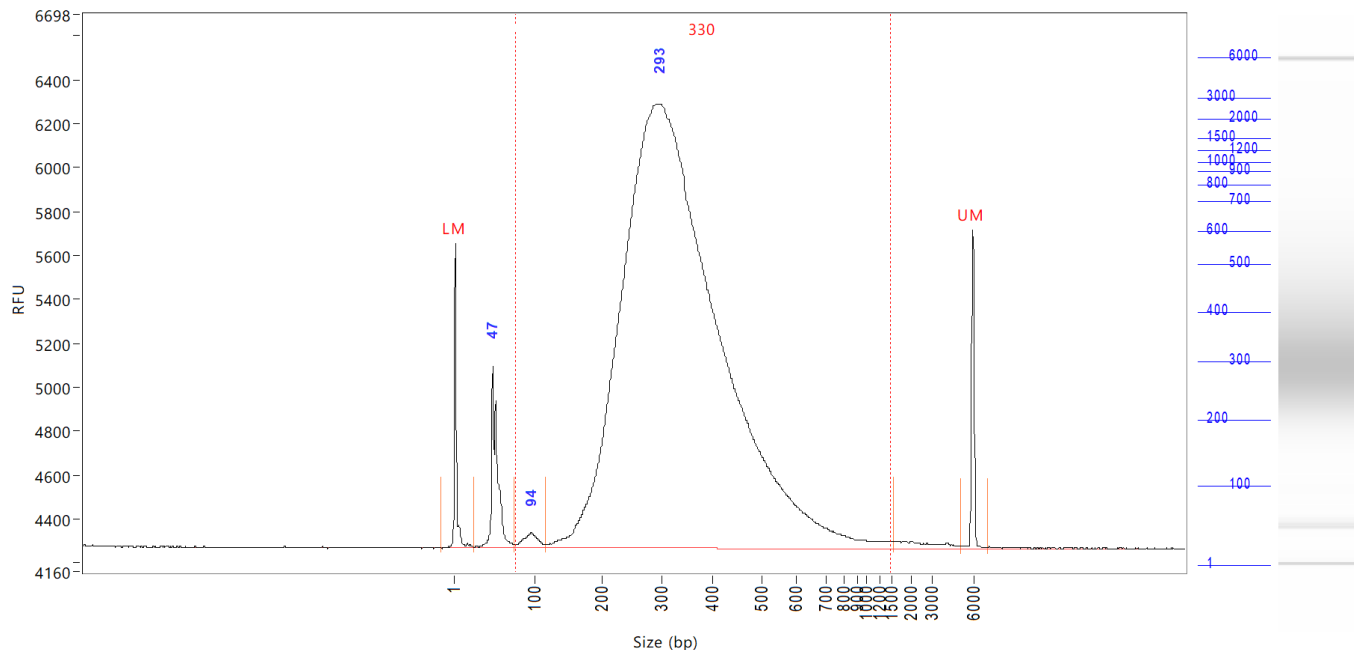

| Peak | Size (bp) | Conc. (ng/uL) | From (bp) | To (bp) | RFU  |
|------|-----------|---------------|-----------|---------|------|
| 1    | 1 (LM)    | 0.0124        | 0         | 25      | 1388 |
| 2    | 47        | 0.2274        | 25        | 74      | 826  |
| 3    | 94        | 0.0467        | 74        | 116     | 70   |
| 4    | 293       | 6.4875        | 116       | 1581    | 2026 |
| 5    | 6000 (UM) | 0.0074        | 5110      | 7111    | 1454 |

TIC: 6.7616 ng/uL  
 TIM: 40.2740 nmole/L  
 Total Conc.: 6.7903 ng/uL

Smear Analysis      75 bp to 1500 bp      6.5310 ng/uL      96.2 %Total      32.5523 nmole/L      330 Avg. Size (b.p.)      34.21 %CV

Sample Peak Width (sec): 50      Sample Min Peak Height: 25      Sample Baseline V to V?: Y      Sample Baseline V to V pts: 3  
 Sample Filter: Binomial      # of Pts for Filter: 3      Sample Start Region (min): 0      Sample End Region (min): 50  
 Manual Baseline Start (min): 10      Manual Baseline End (min): 48  
 Marker Peak Width (sec): 5      Marker Min Peak Height: 200      Marker Baseline V to V?: Y      Marker Baseline V to V pts: 3  
 Lower Marker Selection: First Peak > 200 RFU      Upper Marker Selection: Last Peak > 200 RFU  
 Ladder Size (bp): 1, 100, 200, 300, 400, 500, 600, 700, 800, 900, 1000, 1200, 1500, 2000, 3000, 6000  
 Quantification Using: Ladder      Final Concentration (ng/uL): 0.0830      Dilution Factor: 12.0

Sample: 103613-001-039

Well Location: G5

Created: Friday, June 21, 2019 2:11:36 PM

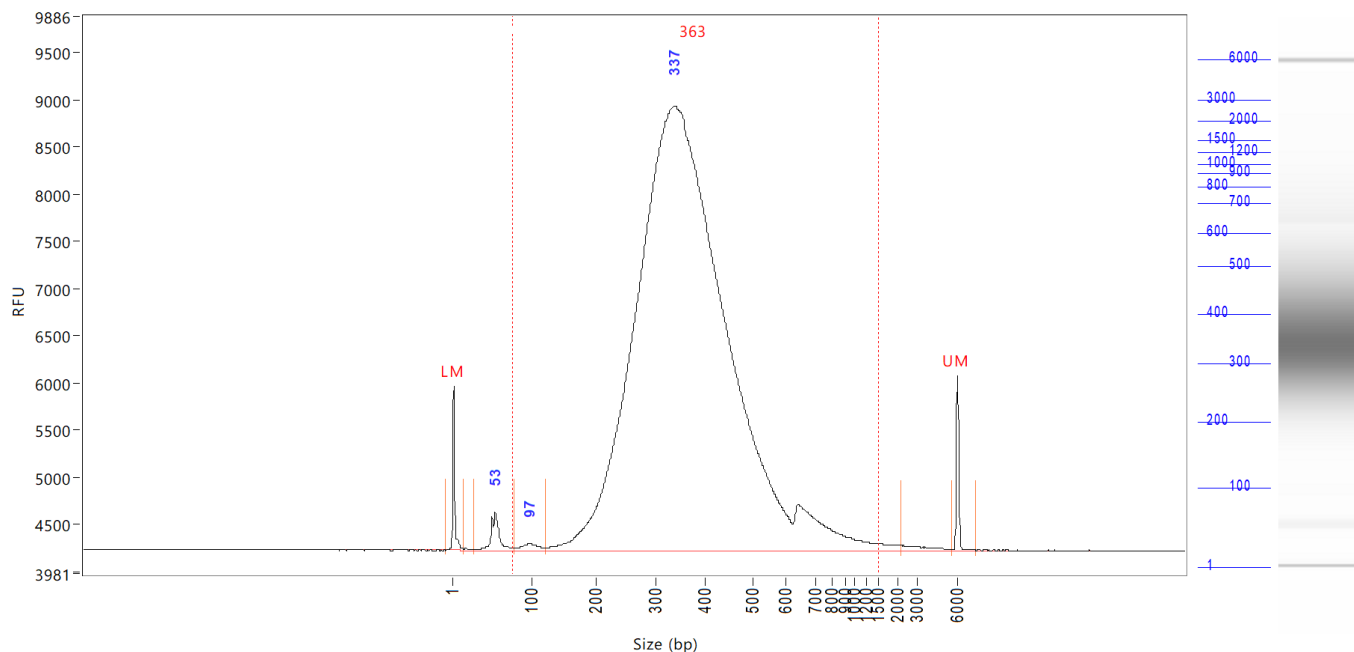

| Peak | Size (bp) | Conc. (ng/uL) | From (bp) | To (bp) | RFU  |
|------|-----------|---------------|-----------|---------|------|
| 1    | 1 (LM)    | 0.0124        | 0         | 14      | 1740 |
| 2    | 53        | 0.1273        | 27        | 78      | 398  |
| 3    | 97        | 0.0430        | 78        | 121     | 67   |
| 4    | 337       | 11.7220       | 121       | 2168    | 4717 |
| 5    | 6000 (UM) | 0.0079        | 5619      | 7364    | 1861 |

TIC: 11.8923 ng/uL  
 TIM: 57.1299 nmole/L  
 Total Conc.: 11.9257 ng/uL

Smear Analysis      75 bp to 1500 bp      11.7403 ng/uL      98.4 %Total      53.2245 nmole/L      363 Avg. Size (b.p.)      31.98 %CV

Sample Peak Width (sec): 50      Sample Min Peak Height: 25      Sample Baseline V to V?: Y      Sample Baseline V to V pts: 3  
 Sample Filter: Binomial      # of Pts for Filter: 3      Sample Start Region (min): 0      Sample End Region (min): 50  
 Manual Baseline Start (min): 10      Manual Baseline End (min): 48  
 Marker Peak Width (sec): 5      Marker Min Peak Height: 200      Marker Baseline V to V?: Y      Marker Baseline V to V pts: 3  
 Lower Marker Selection: First Peak > 200 RFU      Upper Marker Selection: Last Peak > 200 RFU  
 Ladder Size (bp): 1, 100, 200, 300, 400, 500, 600, 700, 800, 900, 1000, 1200, 1500, 2000, 3000, 6000  
 Quantification Using: Ladder      Final Concentration (ng/uL): 0.0830      Dilution Factor: 12.0

Sample: 103613-001-040

Well Location: H5

Created: Friday, June 21, 2019 2:11:36 PM

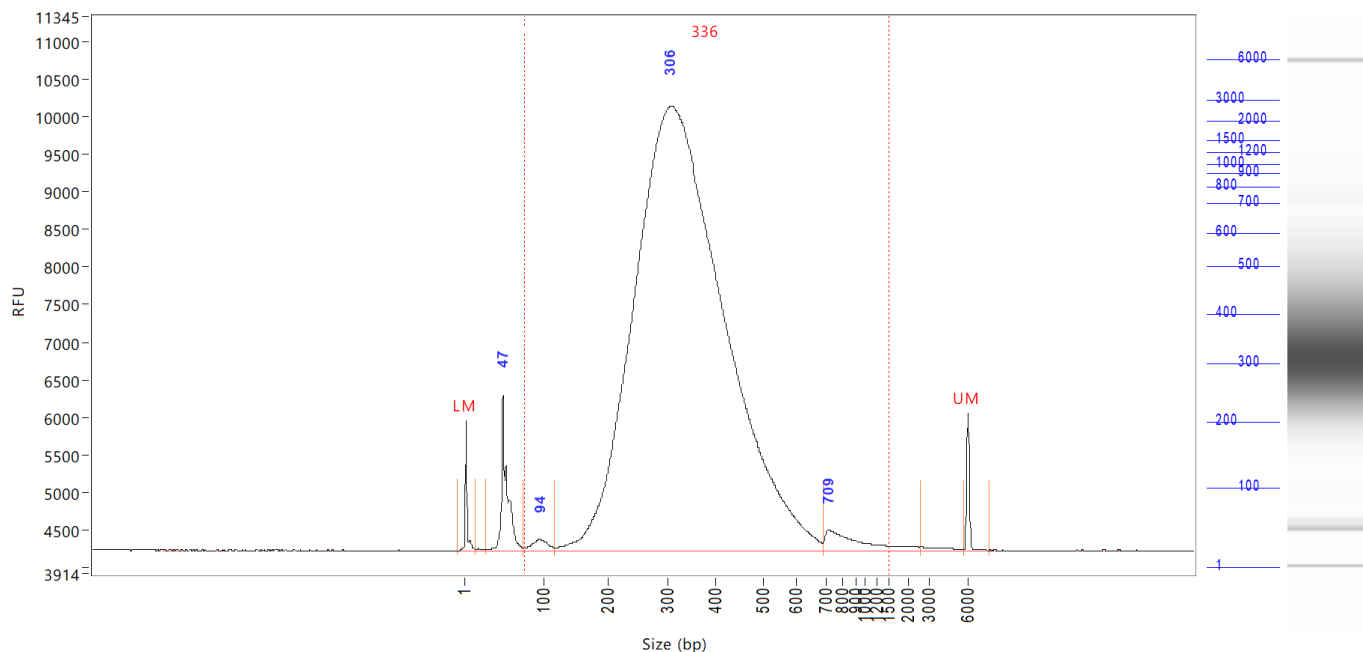

| Peak | Size (bp) | Conc. (ng/uL) | From (bp) | To (bp) | RFU  |
|------|-----------|---------------|-----------|---------|------|
| 1    | 1 (LM)    | 0.0124        | 0         | 15      | 1726 |
| 2    | 47        | 0.4499        | 27        | 75      | 2068 |
| 3    | 94        | 0.0837        | 75        | 116     | 150  |
| 4    | 306       | 14.8532       | 116       | 690     | 5936 |
| 5    | 709       | 0.2025        | 690       | 2634    | 278  |
| 6    | 6000 (UM) | 0.0078        | 5670      | 7566    | 1834 |

TIC: 15.5893 ng/uL  
 TIM: 90.0548 nmole/L  
 Total Conc.: 15.6155 ng/uL

Smear Analysis      75 bp to 1500 bp      15.1077 ng/ul      96.7 %Total      74.0712 nmole/L      336 Avg. Size (b.p.)      31.69 %CV

Sample Peak Width (sec): 50      Sample Min Peak Height: 25      Sample Baseline V to V?: Y      Sample Baseline V to V pts: 3  
 Sample Filter: Binomial      # of Pts for Filter: 3      Sample Start Region (min): 0      Sample End Region (min): 50  
 Manual Baseline Start (min): 10      Manual Baseline End (min): 48  
 Marker Peak Width (sec): 5      Marker Min Peak Height: 200      Marker Baseline V to V?: Y      Marker Baseline V to V pts: 3  
 Lower Marker Selection: First Peak > 200 RFU      Upper Marker Selection: Last Peak > 200 RFU  
 Ladder Size (bp): 1, 100, 200, 300, 400, 500, 600, 700, 800, 900, 1000, 1200, 1500, 2000, 3000, 6000  
 Quantification Using: Ladder      Final Concentration (ng/uL): 0.0830      Dilution Factor: 12.0

Sample: 103613-001-041

Well Location: A6

Created: Friday, June 21, 2019 2:11:36 PM

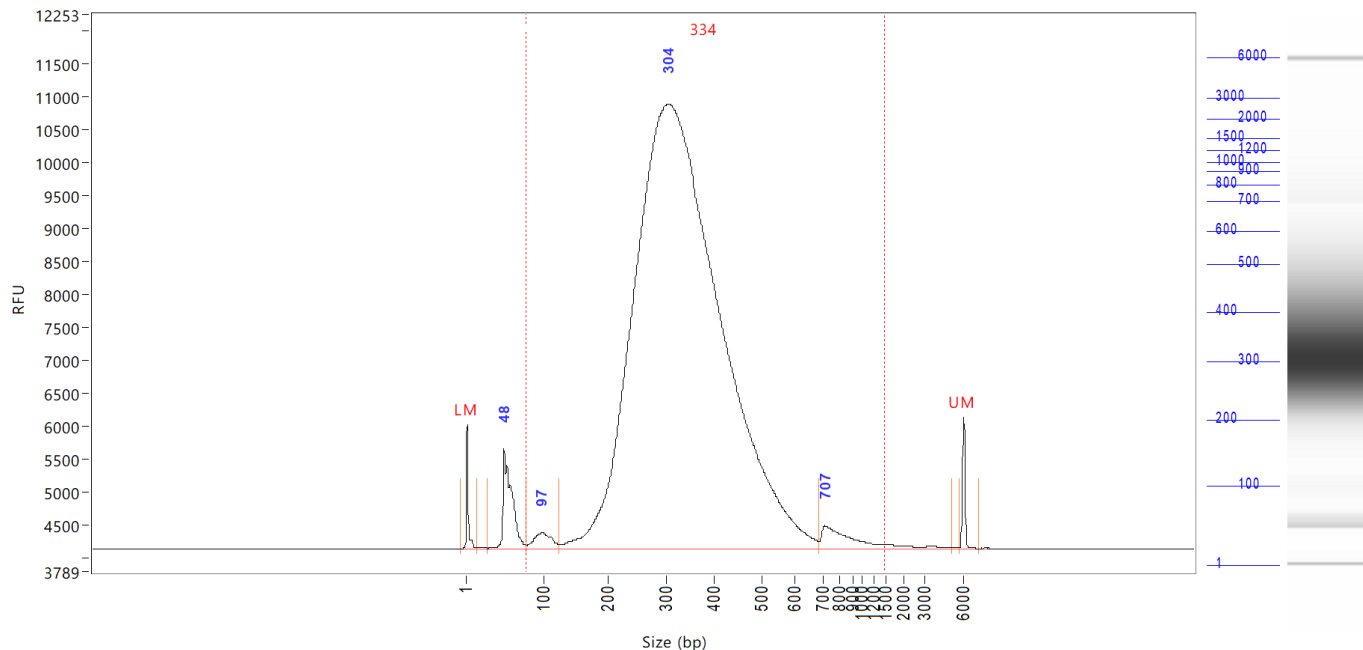

| Peak | Size (bp) | Conc. (ng/uL) | From (bp) | To (bp) | RFU  |
|------|-----------|---------------|-----------|---------|------|
| 1    | 1 (LM)    | 0.0124        | 0         | 15      | 1889 |
| 2    | 48        | 0.4883        | 28        | 77      | 1511 |
| 3    | 97        | 0.1482        | 77        | 122     | 242  |
| 4    | 304       | 15.3314       | 122       | 685     | 6765 |
| 5    | 707       | 0.2325        | 685       | 5085    | 349  |
| 6    | 6000 (UM) | 0.0083        | 5670      | 7137    | 1999 |

TIC: 16.2004 ng/uL  
 TIM: 94.0626 nmole/L  
 Total Conc.: 16.2054 ng/uL

Smear Analysis      75 bp to 1500 bp      15.6762 ng/ul      96.7 %Total      77.1707 nmole/L      334 Avg. Size (b.p.)      31.64 %CV

Sample Peak Width (sec): 50      Sample Min Peak Height: 25      Sample Baseline V to V?: Y      Sample Baseline V to V pts: 3  
 Sample Filter: Binomial      # of Pts for Filter: 3      Sample Start Region (min): 0      Sample End Region (min): 50  
 Manual Baseline Start (min): 10      Manual Baseline End (min): 48  
 Marker Peak Width (sec): 5      Marker Min Peak Height: 200      Marker Baseline V to V?: Y      Marker Baseline V to V pts: 3  
 Lower Marker Selection: First Peak > 200 RFU      Upper Marker Selection: Last Peak > 200 RFU  
 Ladder Size (bp): 1, 100, 200, 300, 400, 500, 600, 700, 800, 900, 1000, 1200, 1500, 2000, 3000, 6000  
 Quantification Using: Ladder      Final Concentration (ng/uL): 0.0830      Dilution Factor: 12.0

Sample: 103613-001-042

Well Location: B6

Created: Friday, June 21, 2019 2:11:36 PM

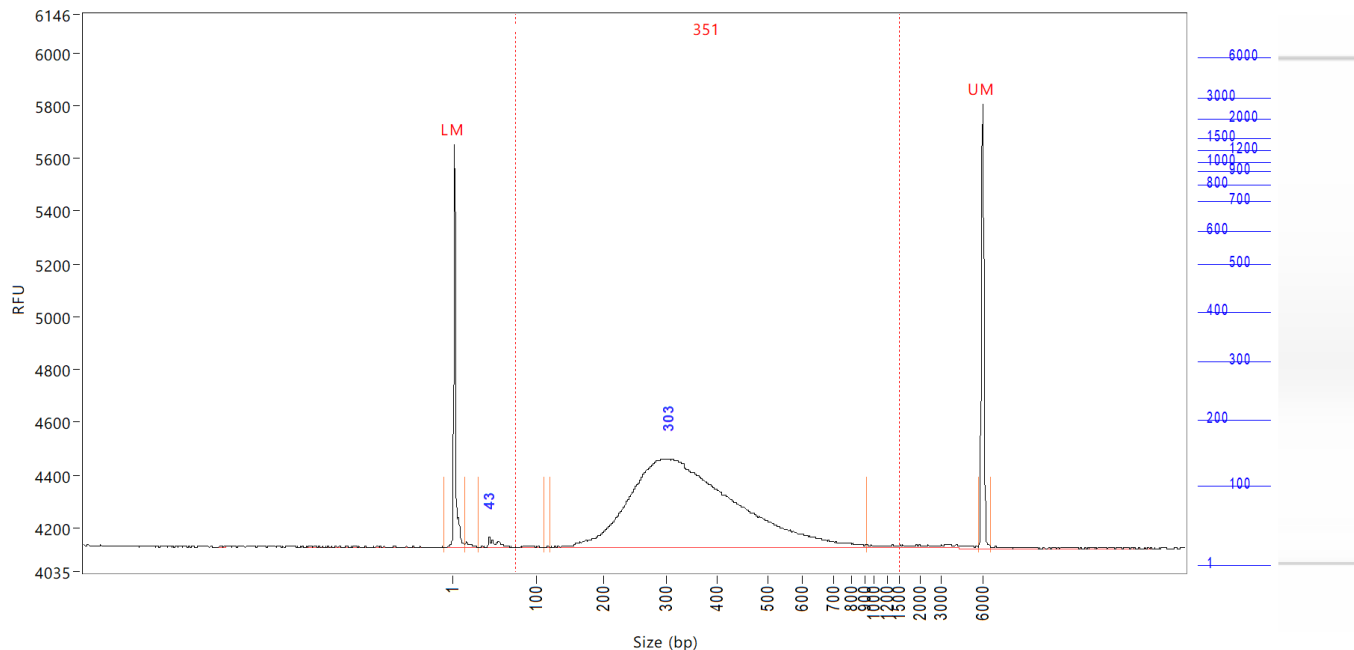

| Peak | Size (bp) | Conc. (ng/uL) | From (bp) | To (bp) | RFU  |
|------|-----------|---------------|-----------|---------|------|
| 1    | 1 (LM)    | 0.0124        | 0         | 14      | 1526 |
| 2    | 43        | 0.0184        | 31        | 112     | 42   |
| 3    | 303       | 1.0816        | 121       | 921     | 339  |
| 4    | 6000 (UM) | 0.0075        | 5695      | 6606    | 1686 |

TIC: 1.1000 ng/uL  
 TIM: 5.6243 nmole/L  
 Total Conc.: 1.1249 ng/uL

Smear Analysis      75 bp to 1500 bp      1.0916 ng/uL      97.0 %Total      5.1162 nmole/L      351 Avg. Size (b.p.)      35.60 %CV

Sample Peak Width (sec): 50      Sample Min Peak Height: 25      Sample Baseline V to V?: Y      Sample Baseline V to V pts: 3  
 Sample Filter: Binomial      # of Pts for Filter: 3      Sample Start Region (min): 0      Sample End Region (min): 50  
 Manual Baseline Start (min): 10      Manual Baseline End (min): 48  
 Marker Peak Width (sec): 5      Marker Min Peak Height: 200      Marker Baseline V to V?: Y      Marker Baseline V to V pts: 3  
 Lower Marker Selection: First Peak > 200 RFU      Upper Marker Selection: Last Peak > 200 RFU  
 Ladder Size (bp): 1, 100, 200, 300, 400, 500, 600, 700, 800, 900, 1000, 1200, 1500, 2000, 3000, 6000  
 Quantification Using: Ladder      Final Concentration (ng/uL): 0.0830      Dilution Factor: 12.0

Sample: 103613-001-043

Well Location: C6

Created: Friday, June 21, 2019 2:11:36 PM

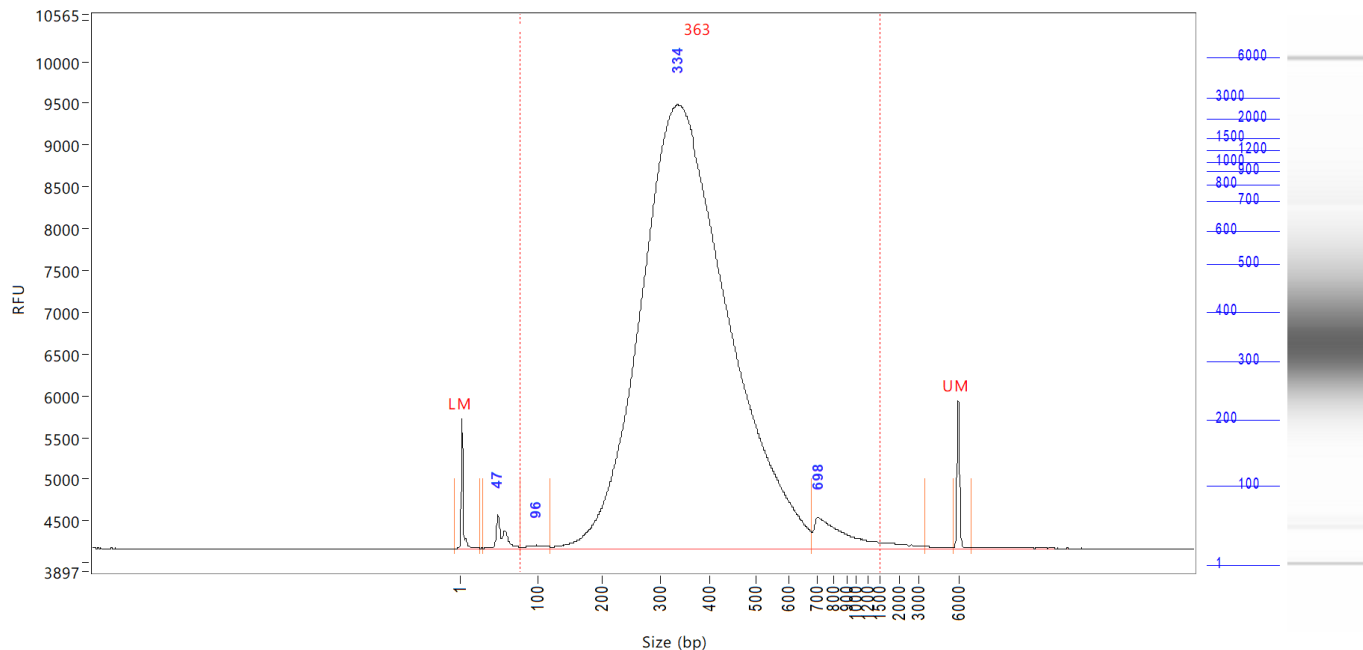

| Peak | Size (bp) | Conc. (ng/uL) | From (bp) | To (bp) | RFU  |
|------|-----------|---------------|-----------|---------|------|
| 1    | 1 (LM)    | 0.0124        | 0         | 26      | 1563 |
| 2    | 47        | 0.1288        | 29        | 77      | 403  |
| 3    | 96        | 0.0312        | 77        | 119     | 40   |
| 4    | 334       | 14.1946       | 119       | 680     | 5327 |
| 5    | 698       | 0.3152        | 680       | 3509    | 379  |
| 6    | 6000 (UM) | 0.0084        | 5619      | 7061    | 1770 |

TIC: 14.6697 ng/uL  
 TIM: 71.0550 nmole/L  
 Total Conc.: 14.6778 ng/uL

Smear Analysis      75 bp to 1500 bp      14.4967 ng/ul      98.8 %Total      65.7633 nmole/L      363 Avg. Size (b.p.)      31.29 %CV

Sample Peak Width (sec): 50      Sample Min Peak Height: 25      Sample Baseline V to V?: Y      Sample Baseline V to V pts: 3  
 Sample Filter: Binomial      # of Pts for Filter: 3      Sample Start Region (min): 0      Sample End Region (min): 50  
 Manual Baseline Start (min): 10      Manual Baseline End (min): 48  
 Marker Peak Width (sec): 5      Marker Min Peak Height: 200      Marker Baseline V to V?: Y      Marker Baseline V to V pts: 3  
 Lower Marker Selection: First Peak > 200 RFU      Upper Marker Selection: Last Peak > 200 RFU  
 Ladder Size (bp): 1, 100, 200, 300, 400, 500, 600, 700, 800, 900, 1000, 1200, 1500, 2000, 3000, 6000  
 Quantification Using: Ladder      Final Concentration (ng/uL): 0.0830      Dilution Factor: 12.0



Sample: 103613-001-044

Well Location: D6

Created: Friday, June 21, 2019 2:11:36 PM

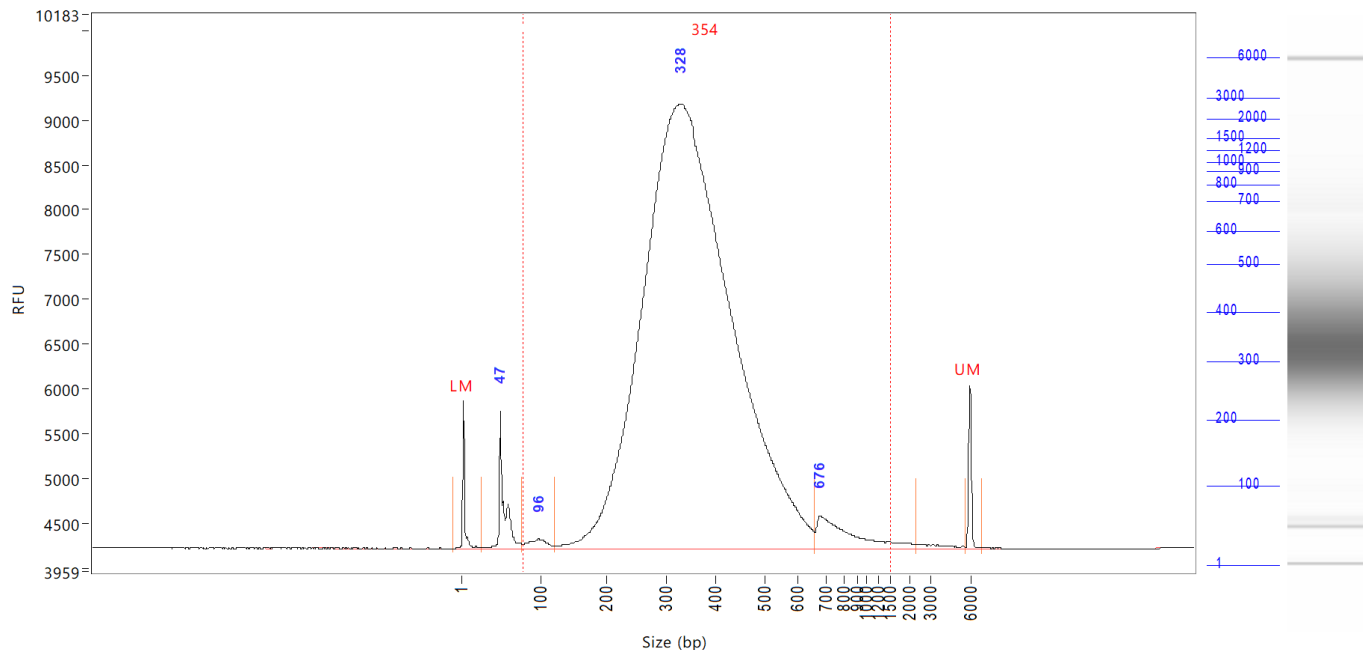

| Peak | Size (bp) | Conc. (ng/uL) | From (bp) | To (bp) | RFU  |
|------|-----------|---------------|-----------|---------|------|
| 1    | 1 (LM)    | 0.0124        | 0         | 25      | 1644 |
| 2    | 47        | 0.2958        | 25        | 75      | 1530 |
| 3    | 96        | 0.0724        | 75        | 120     | 105  |
| 4    | 328       | 12.6587       | 120       | 659     | 4972 |
| 5    | 676       | 0.2907        | 659       | 2301    | 370  |
| 6    | 6000 (UM) | 0.0084        | 5670      | 6808    | 1825 |

TIC: 13.3176 ng/uL  
 TIM: 71.2917 nmole/L  
 Total Conc.: 13.3447 ng/uL

Smear Analysis      75 bp to 1500 bp      12.9915 ng/uL      97.4 %Total      60.3957 nmole/L      354 Avg. Size (b.p.)      31.77 %CV

Sample Peak Width (sec): 50      Sample Min Peak Height: 25      Sample Baseline V to V?: Y      Sample Baseline V to V pts: 3  
 Sample Filter: Binomial      # of Pts for Filter: 3      Sample Start Region (min): 0      Sample End Region (min): 50  
 Manual Baseline Start (min): 10      Manual Baseline End (min): 48  
 Marker Peak Width (sec): 5      Marker Min Peak Height: 200      Marker Baseline V to V?: Y      Marker Baseline V to V pts: 3  
 Lower Marker Selection: First Peak > 200 RFU      Upper Marker Selection: Last Peak > 200 RFU  
 Ladder Size (bp): 1, 100, 200, 300, 400, 500, 600, 700, 800, 900, 1000, 1200, 1500, 2000, 3000, 6000  
 Quantification Using: Ladder      Final Concentration (ng/uL): 0.0830      Dilution Factor: 12.0

Sample: 103613-001-045

Well Location: E6

Created: Friday, June 21, 2019 2:11:36 PM

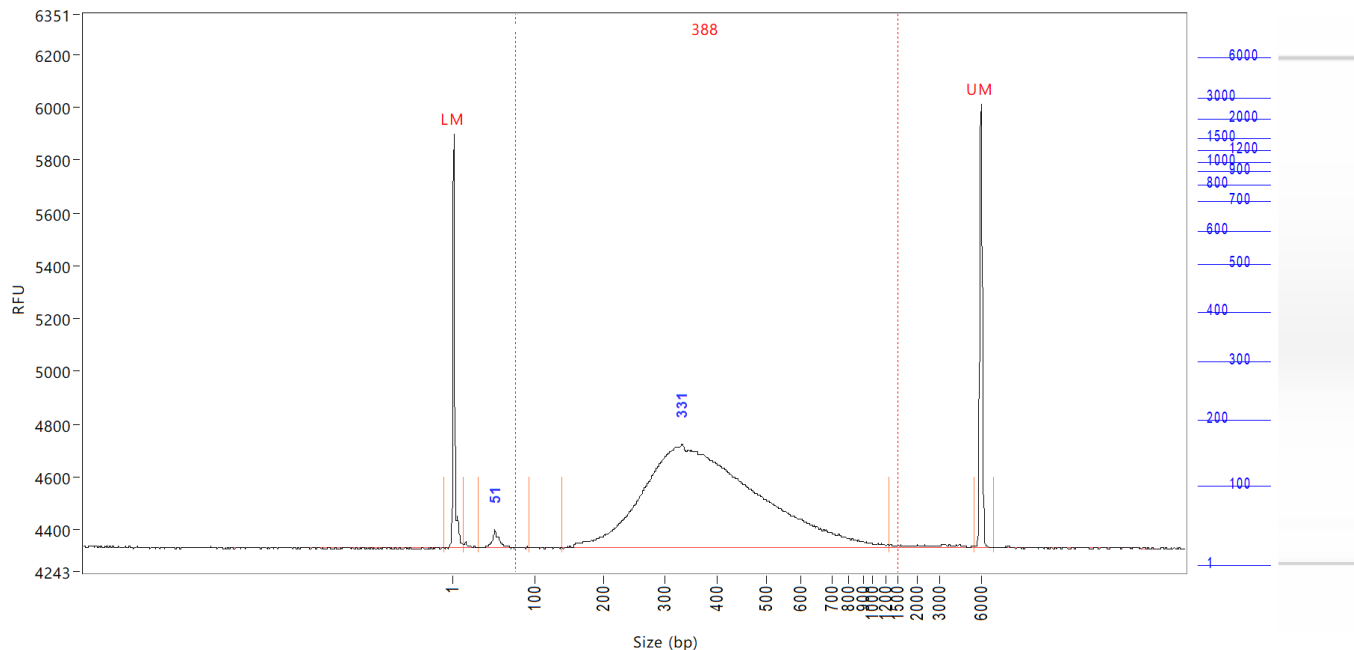

| Peak | Size (bp) | Conc. (ng/uL) | From (bp) | To (bp) | RFU  |
|------|-----------|---------------|-----------|---------|------|
| 1    | 1 (LM)    | 0.0124        | 0         | 14      | 1566 |
| 2    | 51        | 0.0225        | 32        | 92      | 69   |
| 3    | 331       | 1.3128        | 140       | 1273    | 392  |
| 4    | 6000 (UM) | 0.0078        | 5543      | 6909    | 1683 |

TIC: 1.3353 ng/uL  
 TIM: 6.2640 nmole/L  
 Total Conc.: 1.3552 ng/uL

Smear Analysis      75 bp to 1500 bp      1.3172 ng/uL      97.2 %Total      5.5894 nmole/L      388 Avg. Size (b.p.)      34.82 %CV

Sample Peak Width (sec): 50      Sample Min Peak Height: 25      Sample Baseline V to V?: Y      Sample Baseline V to V pts: 3  
 Sample Filter: Binomial      # of Pts for Filter: 3      Sample Start Region (min): 0      Sample End Region (min): 50  
 Manual Baseline Start (min): 10      Manual Baseline End (min): 48  
 Marker Peak Width (sec): 5      Marker Min Peak Height: 200      Marker Baseline V to V?: Y      Marker Baseline V to V pts: 3  
 Lower Marker Selection: First Peak > 200 RFU      Upper Marker Selection: Last Peak > 200 RFU  
 Ladder Size (bp): 1, 100, 200, 300, 400, 500, 600, 700, 800, 900, 1000, 1200, 1500, 2000, 3000, 6000  
 Quantification Using: Ladder      Final Concentration (ng/uL): 0.0830      Dilution Factor: 12.0

Sample: 103613-001-046

Well Location: F6

Created: Friday, June 21, 2019 2:11:36 PM

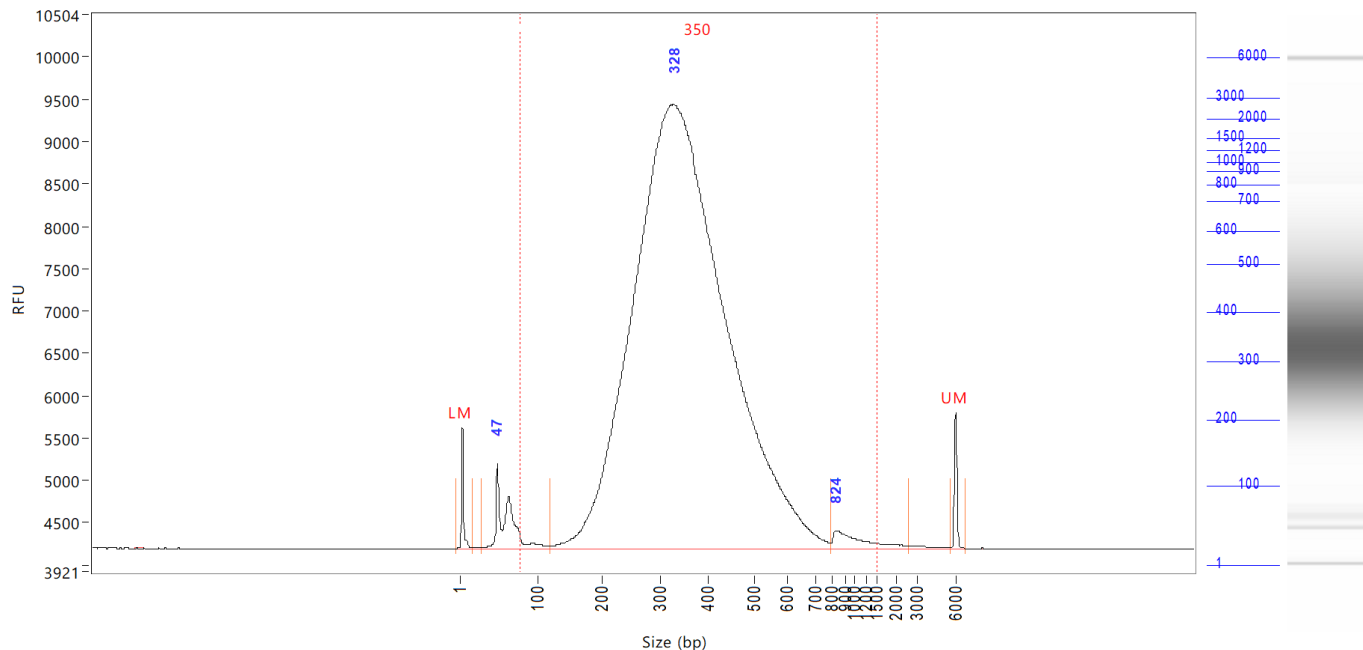

| Peak | Size (bp) | Conc. (ng/uL) | From (bp) | To (bp) | RFU  |
|------|-----------|---------------|-----------|---------|------|
| 1    | 1 (LM)    | 0.0124        | 0         | 15      | 1432 |
| 2    | 47        | 0.4876        | 28        | 118     | 1005 |
| 3    | 328       | 16.2209       | 118       | 792     | 5259 |
| 4    | 824       | 0.1566        | 792       | 2617    | 215  |
| 5    | 6000 (UM) | 0.0081        | 5568      | 6733    | 1597 |

TIC: 16.8651 ng/uL  
 TIM: 90.4509 nmole/L  
 Total Conc.: 16.8858 ng/uL

Smear Analysis      75 bp to 1500 bp      16.4106 ng/uL      97.2 %Total      77.1775 nmole/L      350 Avg. Size (b.p.)      31.65 %CV

Sample Peak Width (sec): 50      Sample Min Peak Height: 25      Sample Baseline V to V?: Y      Sample Baseline V to V pts: 3  
 Sample Filter: Binomial      # of Pts for Filter: 3      Sample Start Region (min): 0      Sample End Region (min): 50  
 Manual Baseline Start (min): 10      Manual Baseline End (min): 48  
 Marker Peak Width (sec): 5      Marker Min Peak Height: 200      Marker Baseline V to V?: Y      Marker Baseline V to V pts: 3  
 Lower Marker Selection: First Peak > 200 RFU      Upper Marker Selection: Last Peak > 200 RFU  
 Ladder Size (bp): 1, 100, 200, 300, 400, 500, 600, 700, 800, 900, 1000, 1200, 1500, 2000, 3000, 6000  
 Quantification Using: Ladder      Final Concentration (ng/uL): 0.0830      Dilution Factor: 12.0

Sample: 103613-001-047

Well Location: G6

Created: Friday, June 21, 2019 2:11:36 PM

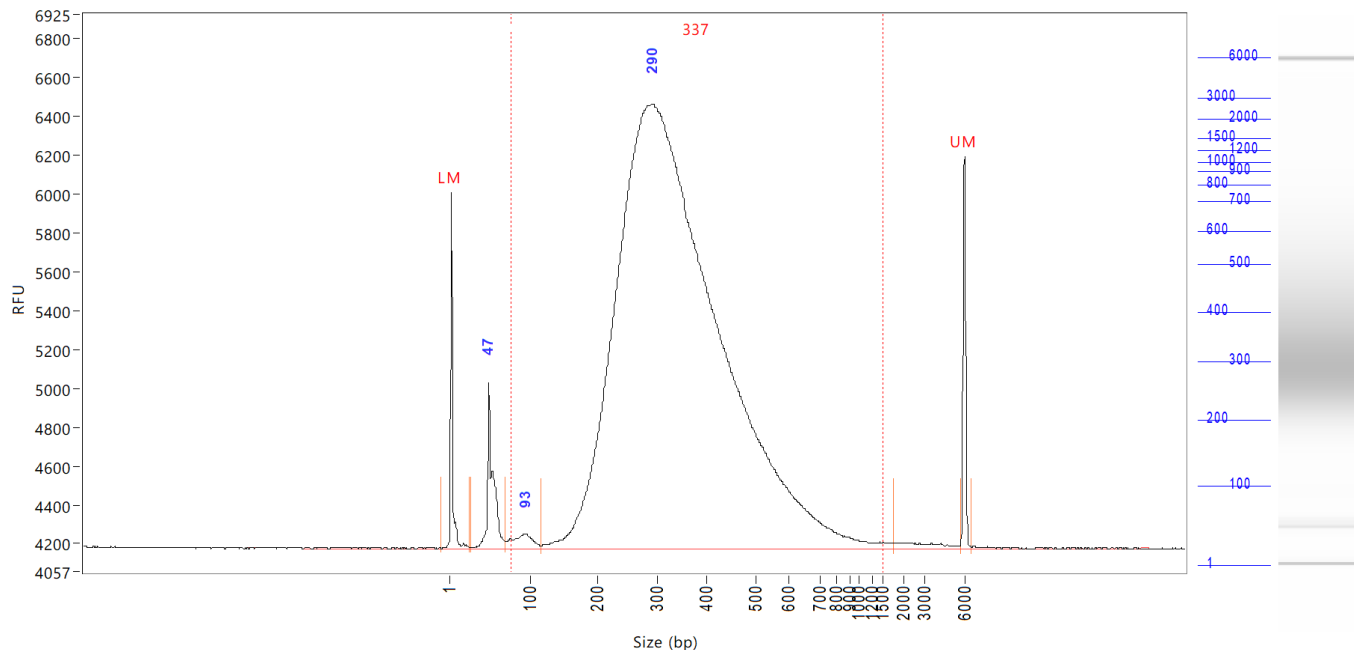

| Peak | Size (bp) | Conc. (ng/uL) | From (bp) | To (bp) | RFU  |
|------|-----------|---------------|-----------|---------|------|
| 1    | 1 (LM)    | 0.0124        | 0         | 24      | 1833 |
| 2    | 47        | 0.1691        | 27        | 69      | 851  |
| 3    | 93        | 0.0495        | 69        | 115     | 75   |
| 4    | 290       | 5.9514        | 115       | 1759    | 2291 |
| 5    | 6000 (UM) | 0.0077        | 5695      | 6505    | 2016 |

TIC: 6.1700 ng/uL  
 TIM: 35.1417 nmole/L  
 Total Conc.: 6.1935 ng/uL

Smear Analysis      75 bp to 1500 bp      5.9891 ng/uL      96.7 %Total      29.2457 nmole/L      337 Avg. Size (b.p.)      34.60 %CV

Sample Peak Width (sec): 50      Sample Min Peak Height: 25      Sample Baseline V to V?: Y      Sample Baseline V to V pts: 3  
 Sample Filter: Binomial      # of Pts for Filter: 3      Sample Start Region (min): 0      Sample End Region (min): 50  
 Manual Baseline Start (min): 10      Manual Baseline End (min): 48  
 Marker Peak Width (sec): 5      Marker Min Peak Height: 200      Marker Baseline V to V?: Y      Marker Baseline V to V pts: 3  
 Lower Marker Selection: First Peak > 200 RFU      Upper Marker Selection: Last Peak > 200 RFU  
 Ladder Size (bp): 1, 100, 200, 300, 400, 500, 600, 700, 800, 900, 1000, 1200, 1500, 2000, 3000, 6000  
 Quantification Using: Ladder      Final Concentration (ng/uL): 0.0830      Dilution Factor: 12.0

**Sample:** 103613-001-048

**Well Location:** H6

**Created:** Friday, June 21, 2019 2:11:36 PM

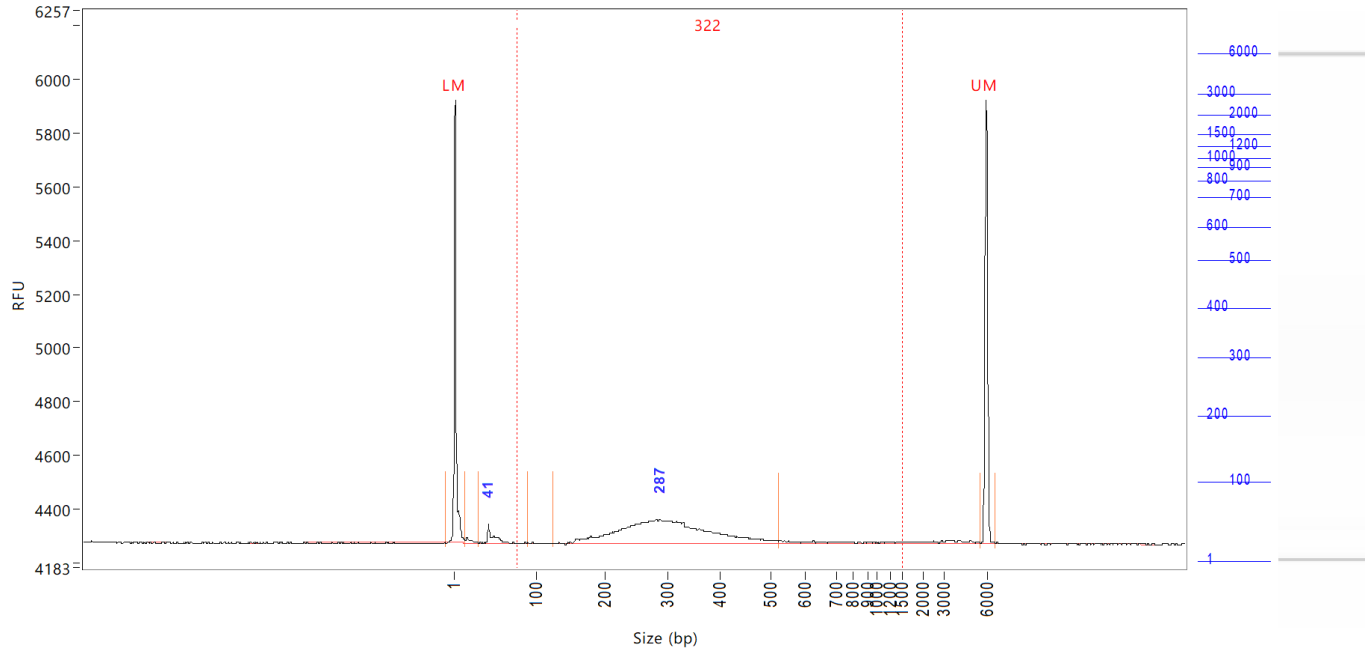

| Peak | Size (bp) | Conc. (ng/uL) | From (bp) | To (bp) | RFU  |
|------|-----------|---------------|-----------|---------|------|
| 1    | 1 (LM)    | 0.0124        | 0         | 14      | 1648 |
| 2    | 41        | 0.0140        | 30        | 89      | 67   |
| 3    | 287       | 0.2290        | 124       | 522     | 86   |
| 4    | 6000 (UM) | 0.0072        | 5619      | 6682    | 1654 |

TIC: 0.2430 ng/uL  
 TIM: 1.7515 nmole/L  
 Total Conc.: 0.2690 ng/uL

Smear Analysis      75 bp to 1500 bp      0.2413 ng/uL      89.7 %Total      1.2328 nmole/L      322 Avg. Size (b.p.)      43.37 %CV

Sample Peak Width (sec): 50      Sample Min Peak Height: 25      Sample Baseline V to V?: Y      Sample Baseline V to V pts: 3  
 Sample Filter: Binomial      # of Pts for Filter: 3      Sample Start Region (min): 0      Sample End Region (min): 50  
 Manual Baseline Start (min): 10      Manual Baseline End (min): 48  
 Marker Peak Width (sec): 5      Marker Min Peak Height: 200      Marker Baseline V to V?: Y      Marker Baseline V to V pts: 3  
 Lower Marker Selection: First Peak > 200 RFU      Upper Marker Selection: Last Peak > 200 RFU  
 Ladder Size (bp): 1, 100, 200, 300, 400, 500, 600, 700, 800, 900, 1000, 1200, 1500, 2000, 3000, 6000  
 Quantification Using: Ladder      Final Concentration (ng/uL): 0.0830      Dilution Factor: 12.0

Sample: 103613-001-049

Well Location: A7

Created: Friday, June 21, 2019 2:11:36 PM

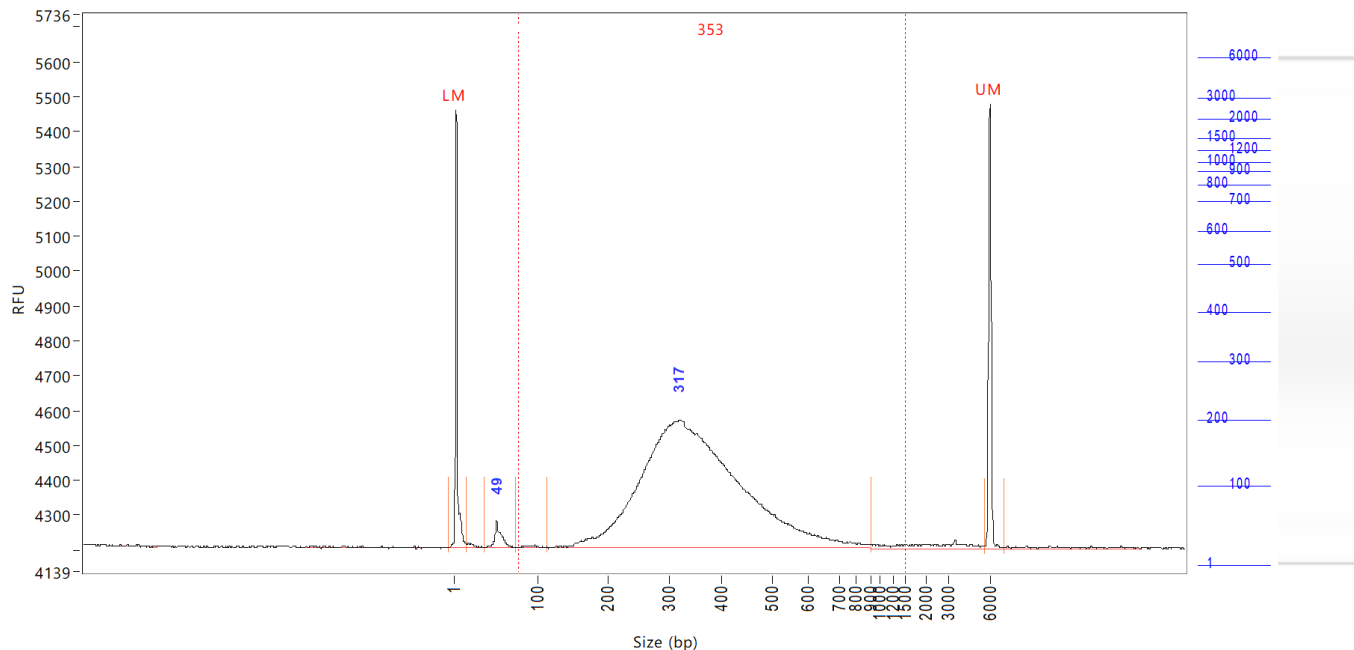

| Peak         | Size (bp) | Conc. (ng/uL) | From (bp) | To (bp) | RFU  |
|--------------|-----------|---------------|-----------|---------|------|
| 1            | 1 (LM)    | 0.0124        | 0         | 15      | 1254 |
| 2            | 49        | 0.0258        | 36        | 72      | 76   |
| 3            | 317       | 1.3263        | 113       | 905     | 368  |
| 4            | 6000 (UM) | 0.0070        | 5695      | 6985    | 1276 |
| TIC:         |           | 1.3521        | ng/uL     |         |      |
| TIM:         |           | 7.0476        | nmole/L   |         |      |
| Total Conc.: |           | 1.3851        | ng/uL     |         |      |

Smear Analysis      75 bp to 1500 bp      1.3372 ng/uL      96.5 %Total      6.2363 nmole/L      353 Avg. Size (b.p.)      33.66 %CV

Sample Peak Width (sec): 50      Sample Min Peak Height: 25      Sample Baseline V to V?: Y      Sample Baseline V to V pts: 3  
 Sample Filter: Binomial      # of Pts for Filter: 3      Sample Start Region (min): 0      Sample End Region (min): 50  
 Manual Baseline Start (min): 10      Manual Baseline End (min): 48  
 Marker Peak Width (sec): 5      Marker Min Peak Height: 200      Marker Baseline V to V?: Y      Marker Baseline V to V pts: 3  
 Lower Marker Selection: First Peak > 200 RFU      Upper Marker Selection: Last Peak > 200 RFU  
 Ladder Size (bp): 1, 100, 200, 300, 400, 500, 600, 700, 800, 900, 1000, 1200, 1500, 2000, 3000, 6000  
 Quantification Using: Ladder      Final Concentration (ng/uL): 0.0830      Dilution Factor: 12.0

Sample: 103613-001-050

Well Location: B7

Created: Friday, June 21, 2019 2:11:36 PM

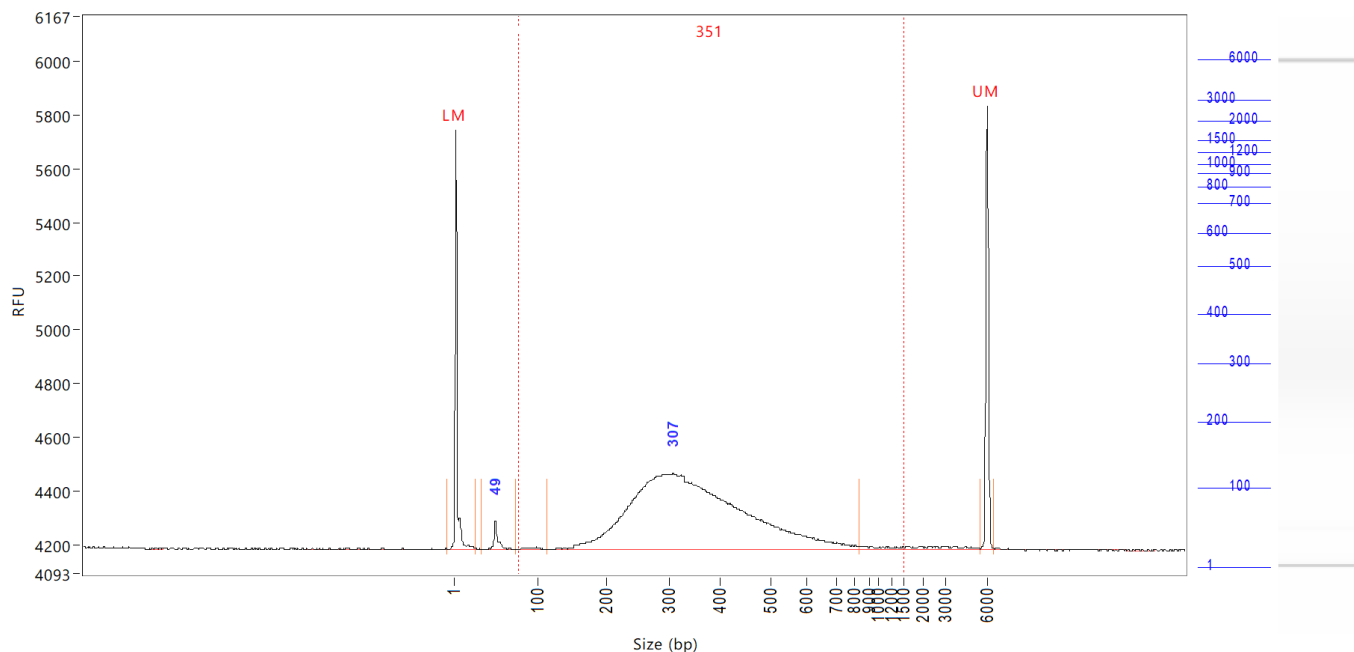

| Peak         | Size (bp) | Conc. (ng/uL) | From (bp) | To (bp) | RFU  |
|--------------|-----------|---------------|-----------|---------|------|
| 1            | 1 (LM)    | 0.0124        | 0         | 25      | 1562 |
| 2            | 49        | 0.0179        | 32        | 73      | 105  |
| 3            | 307       | 0.9357        | 112       | 837     | 283  |
| 4            | 6000 (UM) | 0.0074        | 5492      | 6505    | 1655 |
| TIC:         |           | 0.9536        | ng/uL     |         |      |
| TIM:         |           | 5.0351        | nmole/L   |         |      |
| Total Conc.: |           | 0.9810        | ng/uL     |         |      |

Smear Analysis      75 bp to 1500 bp      0.9485 ng/uL      96.7 %Total      4.4411 nmole/L      351 Avg. Size (b.p.)      37.37 %CV

Sample Peak Width (sec): 50      Sample Min Peak Height: 25      Sample Baseline V to V?: Y      Sample Baseline V to V pts: 3  
 Sample Filter: Binomial      # of Pts for Filter: 3      Sample Start Region (min): 0      Sample End Region (min): 50  
 Manual Baseline Start (min): 10      Manual Baseline End (min): 48  
 Marker Peak Width (sec): 5      Marker Min Peak Height: 200      Marker Baseline V to V?: Y      Marker Baseline V to V pts: 3  
 Lower Marker Selection: First Peak > 200 RFU      Upper Marker Selection: Last Peak > 200 RFU  
 Ladder Size (bp): 1, 100, 200, 300, 400, 500, 600, 700, 800, 900, 1000, 1200, 1500, 2000, 3000, 6000  
 Quantification Using: Ladder      Final Concentration (ng/uL): 0.0830      Dilution Factor: 12.0

Sample: 103613-001-051

Well Location: C7

Created: Friday, June 21, 2019 2:11:36 PM

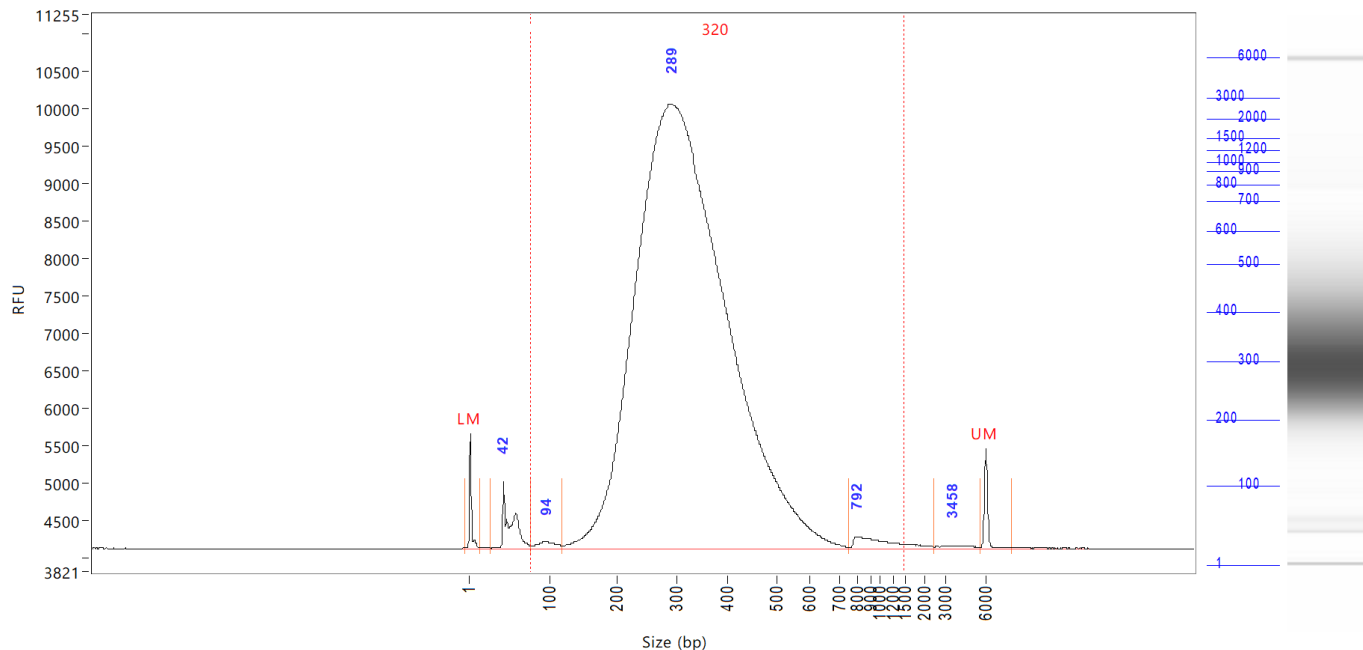

| Peak         | Size (bp) | Conc. (ng/uL) | From (bp) | To (bp) | RFU  |
|--------------|-----------|---------------|-----------|---------|------|
| 1            | 1 (LM)    | 0.0124        | 0         | 14      | 1532 |
| 2            | 42        | 0.3136        | 27        | 75      | 902  |
| 3            | 94        | 0.0704        | 75        | 116     | 93   |
| 4            | 289       | 17.1690       | 116       | 755     | 5939 |
| 5            | 792       | 0.1366        | 755       | 2451    | 163  |
| 6            | 3458      | 0.0252        | 2451      | 5568    | 41   |
| 7            | 6000 (UM) | 0.0083        | 5568      | 7895    | 1334 |
| TIC:         |           | 17.7148       | ng/uL     |         |      |
| TIM:         |           | 100.8776      | nmole/L   |         |      |
| Total Conc.: |           | 17.7181       | ng/uL     |         |      |

Smear Analysis      75 bp to 1500 bp      17.3519 ng/uL      97.9 %Total      89.2609 nmole/L      320 Avg. Size (b.p.)      31.30 %CV

Sample Peak Width (sec): 50      Sample Min Peak Height: 25      Sample Baseline V to V?: Y      Sample Baseline V to V pts: 3  
 Sample Filter: Binomial      # of Pts for Filter: 3      Sample Start Region (min): 0      Sample End Region (min): 50  
 Manual Baseline Start (min): 10      Manual Baseline End (min): 48  
 Marker Peak Width (sec): 5      Marker Min Peak Height: 200      Marker Baseline V to V?: Y      Marker Baseline V to V pts: 3  
 Lower Marker Selection: First Peak > 200 RFU      Upper Marker Selection: Last Peak > 200 RFU  
 Ladder Size (bp): 1, 100, 200, 300, 400, 500, 600, 700, 800, 900, 1000, 1200, 1500, 2000, 3000, 6000  
 Quantification Using: Ladder      Final Concentration (ng/uL): 0.0830      Dilution Factor: 12.0



**Sample:** 103613-001-052

**Well Location:** D7

**Created:** Friday, June 21, 2019 2:11:36 PM

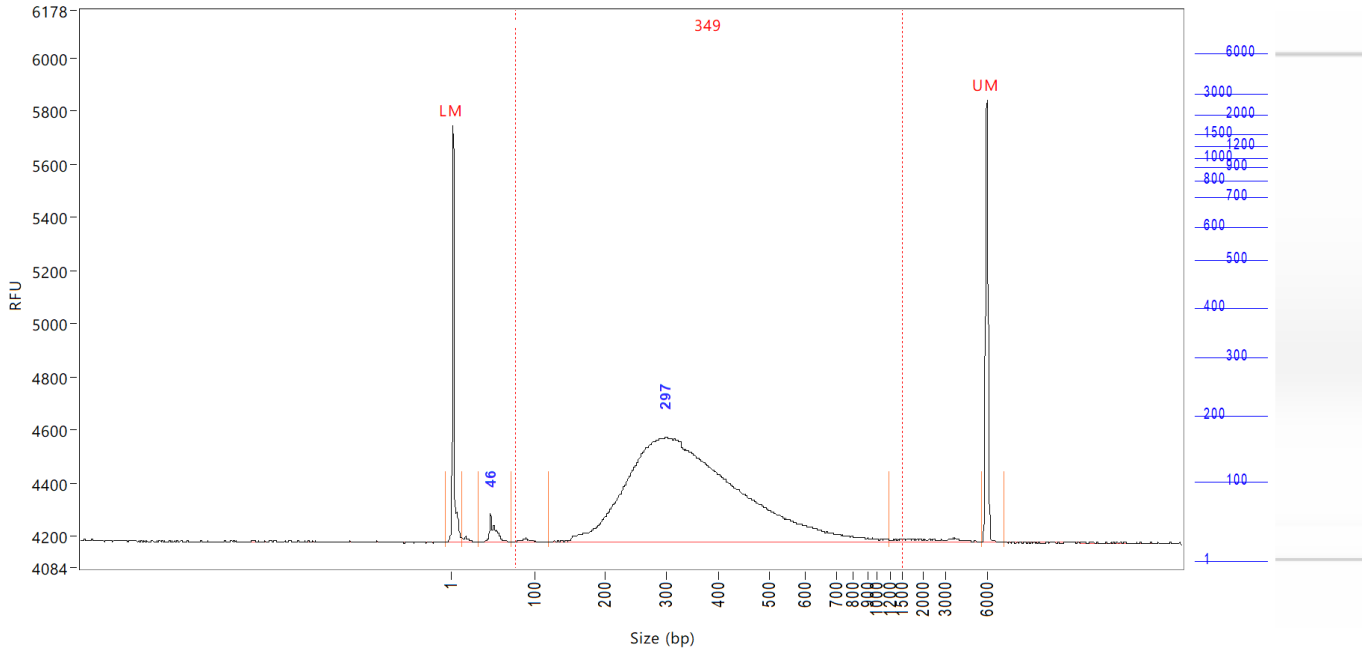

| Peak | Size (bp) | Conc. (ng/uL) | From (bp) | To (bp) | RFU  |
|------|-----------|---------------|-----------|---------|------|
| 1    | 1 (LM)    | 0.0124        | 0         | 14      | 1562 |
| 2    | 46        | 0.0250        | 31        | 71      | 106  |
| 3    | 297       | 1.3200        | 119       | 1172    | 395  |
| 4    | 6000 (UM) | 0.0076        | 5644      | 7212    | 1666 |

TIC: 1.3450 ng/uL  
 TIM: 7.0765 nmole/L  
 Total Conc.: 1.3713 ng/uL

Smear Analysis      75 bp to 1500 bp      1.3280 ng/uL      96.8 %Total      6.2655 nmole/L      349 Avg. Size (b.p.)      36.75 %CV

Sample Peak Width (sec): 50      Sample Min Peak Height: 25      Sample Baseline V to V?: Y      Sample Baseline V to V pts: 3  
 Sample Filter: Binomial      # of Pts for Filter: 3      Sample Start Region (min): 0      Sample End Region (min): 50  
 Manual Baseline Start (min): 10      Manual Baseline End (min): 48  
 Marker Peak Width (sec): 5      Marker Min Peak Height: 200      Marker Baseline V to V?: Y      Marker Baseline V to V pts: 3  
 Lower Marker Selection: First Peak > 200 RFU      Upper Marker Selection: Last Peak > 200 RFU  
 Ladder Size (bp): 1, 100, 200, 300, 400, 500, 600, 700, 800, 900, 1000, 1200, 1500, 2000, 3000, 6000  
 Quantification Using: Ladder      Final Concentration (ng/uL): 0.0830      Dilution Factor: 12.0

Sample: 103613-001-053

Well Location: E7

Created: Friday, June 21, 2019 2:11:36 PM

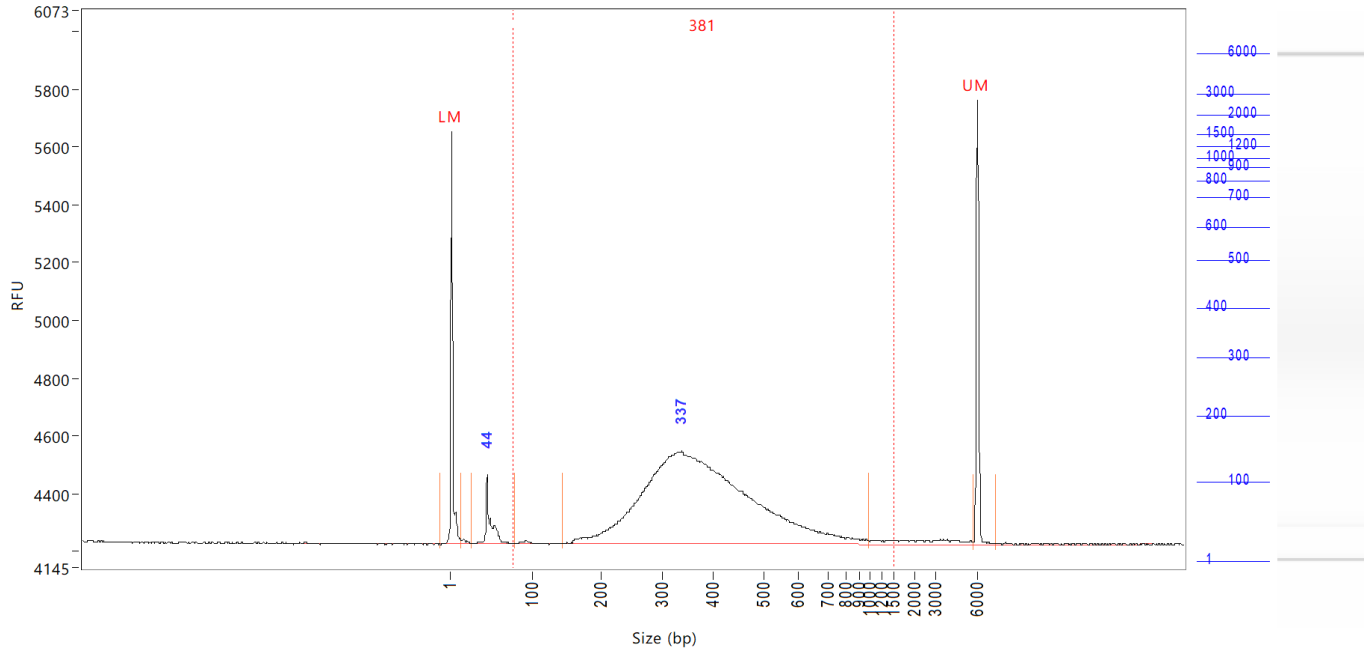

| Peak | Size (bp) | Conc. (ng/uL) | From (bp) | To (bp) | RFU  |
|------|-----------|---------------|-----------|---------|------|
| 1    | 1 (LM)    | 0.0124        | 0         | 14      | 1426 |
| 2    | 44        | 0.0505        | 27        | 77      | 237  |
| 3    | 337       | 1.0923        | 143       | 1001    | 321  |
| 4    | 6000 (UM) | 0.0077        | 5720      | 7288    | 1540 |

TIC: 1.1428 ng/uL  
 TIM: 6.4903 nmole/L  
 Total Conc.: 1.1760 ng/uL

Smear Analysis      75 bp to 1500 bp      1.1032 ng/uL      93.8 %Total      4.7600 nmole/L      381 Avg. Size (b.p.)      35.36 %CV

Sample Peak Width (sec): 50      Sample Min Peak Height: 25      Sample Baseline V to V?: Y      Sample Baseline V to V pts: 3  
 Sample Filter: Binomial      # of Pts for Filter: 3      Sample Start Region (min): 0      Sample End Region (min): 50  
 Manual Baseline Start (min): 10      Manual Baseline End (min): 48  
 Marker Peak Width (sec): 5      Marker Min Peak Height: 200      Marker Baseline V to V?: Y      Marker Baseline V to V pts: 3  
 Lower Marker Selection: First Peak > 200 RFU      Upper Marker Selection: Last Peak > 200 RFU  
 Ladder Size (bp): 1, 100, 200, 300, 400, 500, 600, 700, 800, 900, 1000, 1200, 1500, 2000, 3000, 6000  
 Quantification Using: Ladder      Final Concentration (ng/uL): 0.0830      Dilution Factor: 12.0

Sample: 103613-001-054

Well Location: F7

Created: Friday, June 21, 2019 2:11:36 PM

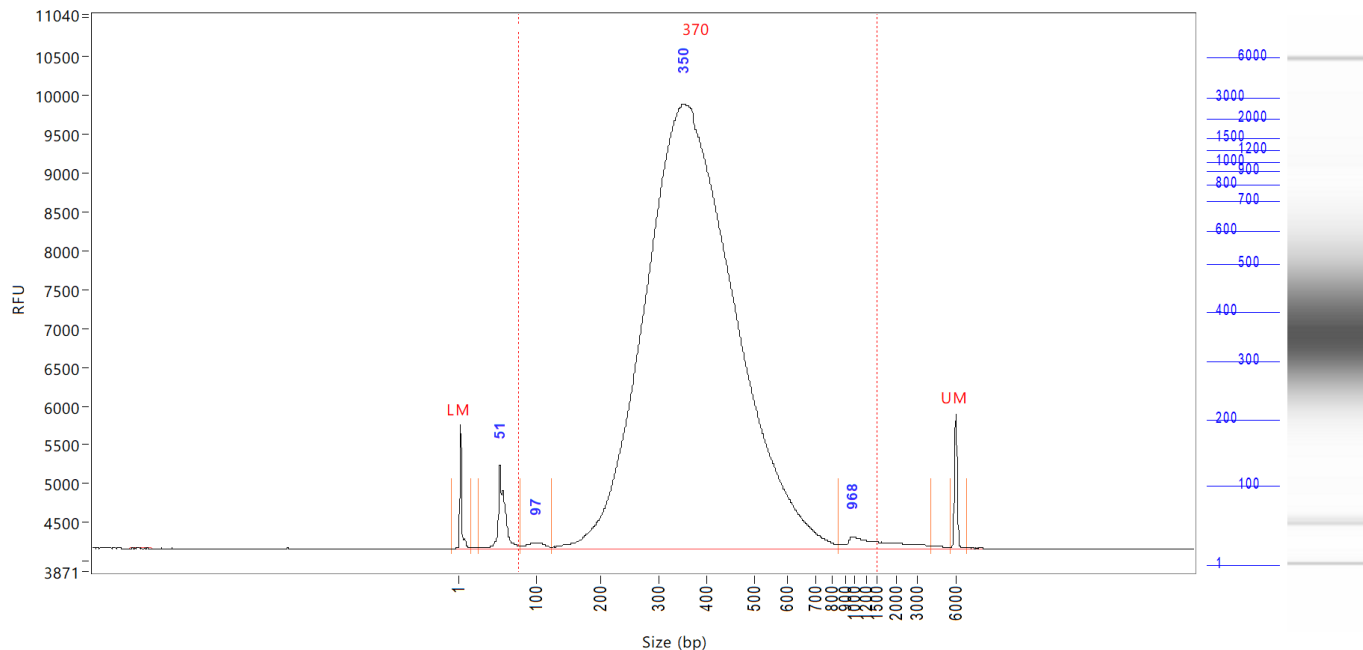

| Peak | Size (bp) | Conc. (ng/uL) | From (bp) | To (bp) | RFU  |
|------|-----------|---------------|-----------|---------|------|
| 1    | 1 (LM)    | 0.0124        | 0         | 15      | 1588 |
| 2    | 51        | 0.2936        | 26        | 79      | 1068 |
| 3    | 97        | 0.0566        | 79        | 124     | 81   |
| 4    | 350       | 15.1445       | 124       | 847     | 5730 |
| 5    | 968       | 0.1410        | 847       | 4094    | 158  |
| 6    | 6000 (UM) | 0.0082        | 5593      | 6834    | 1726 |

TIC: 15.6356 ng/uL  
 TIM: 77.7241 nmole/L  
 Total Conc.: 15.6502 ng/uL

Smear Analysis      75 bp to 1500 bp      15.2817 ng/ul      97.6 %Total      67.9497 nmole/L      370 Avg. Size (b.p.)      29.14 %CV

Sample Peak Width (sec): 50      Sample Min Peak Height: 25      Sample Baseline V to V?: Y      Sample Baseline V to V pts: 3  
 Sample Filter: Binomial      # of Pts for Filter: 3      Sample Start Region (min): 0      Sample End Region (min): 50  
 Manual Baseline Start (min): 10      Manual Baseline End (min): 48  
 Marker Peak Width (sec): 5      Marker Min Peak Height: 200      Marker Baseline V to V?: Y      Marker Baseline V to V pts: 3  
 Lower Marker Selection: First Peak > 200 RFU      Upper Marker Selection: Last Peak > 200 RFU  
 Ladder Size (bp): 1, 100, 200, 300, 400, 500, 600, 700, 800, 900, 1000, 1200, 1500, 2000, 3000, 6000  
 Quantification Using: Ladder      Final Concentration (ng/uL): 0.0830      Dilution Factor: 12.0

Sample: 103613-001-055

Well Location: G7

Created: Friday, June 21, 2019 2:11:36 PM

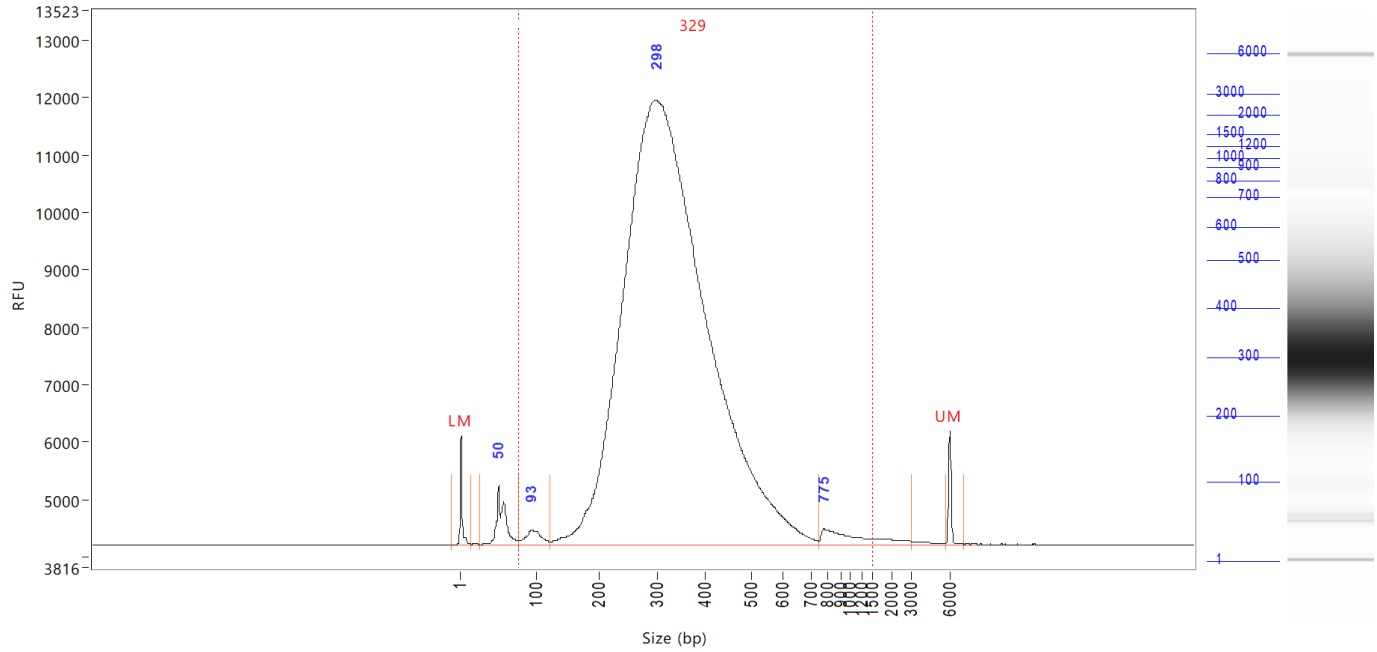

| Peak         | Size (bp) | Conc. (ng/uL) | From (bp) | To (bp) | RFU  |
|--------------|-----------|---------------|-----------|---------|------|
| 1            | 1 (LM)    | 0.0124        | 0         | 15      | 1893 |
| 2            | 50        | 0.2977        | 28        | 77      | 1028 |
| 3            | 93        | 0.1387        | 77        | 122     | 268  |
| 4            | 298       | 17.0557       | 122       | 742     | 7759 |
| 5            | 775       | 0.2127        | 742       | 3000    | 277  |
| 6            | 6000 (UM) | 0.0078        | 5670      | 7086    | 1970 |
| TIC:         |           | 17.7049       | ng/uL     |         |      |
| TIM:         |           | 97.5888       | nmole/L   |         |      |
| Total Conc.: |           | 17.7294       | ng/uL     |         |      |

Smear Analysis      75 bp to 1500 bp      17.3543 ng/uL      97.9 %Total      86.6620 nmole/L      329 Avg. Size (b.p.)      32.46 %CV

Sample Peak Width (sec): 50      Sample Min Peak Height: 25      Sample Baseline V to V?: Y      Sample Baseline V to V pts: 3  
 Sample Filter: Binomial      # of Pts for Filter: 3      Sample Start Region (min): 0      Sample End Region (min): 50  
 Manual Baseline Start (min): 10      Manual Baseline End (min): 48  
 Marker Peak Width (sec): 5      Marker Min Peak Height: 200      Marker Baseline V to V?: Y      Marker Baseline V to V pts: 3  
 Lower Marker Selection: First Peak > 200 RFU      Upper Marker Selection: Last Peak > 200 RFU  
 Ladder Size (bp): 1, 100, 200, 300, 400, 500, 600, 700, 800, 900, 1000, 1200, 1500, 2000, 3000, 6000  
 Quantification Using: Ladder      Final Concentration (ng/uL): 0.0830      Dilution Factor: 12.0

Sample: 103613-001-056

Well Location: H7

Created: Friday, June 21, 2019 2:11:36 PM

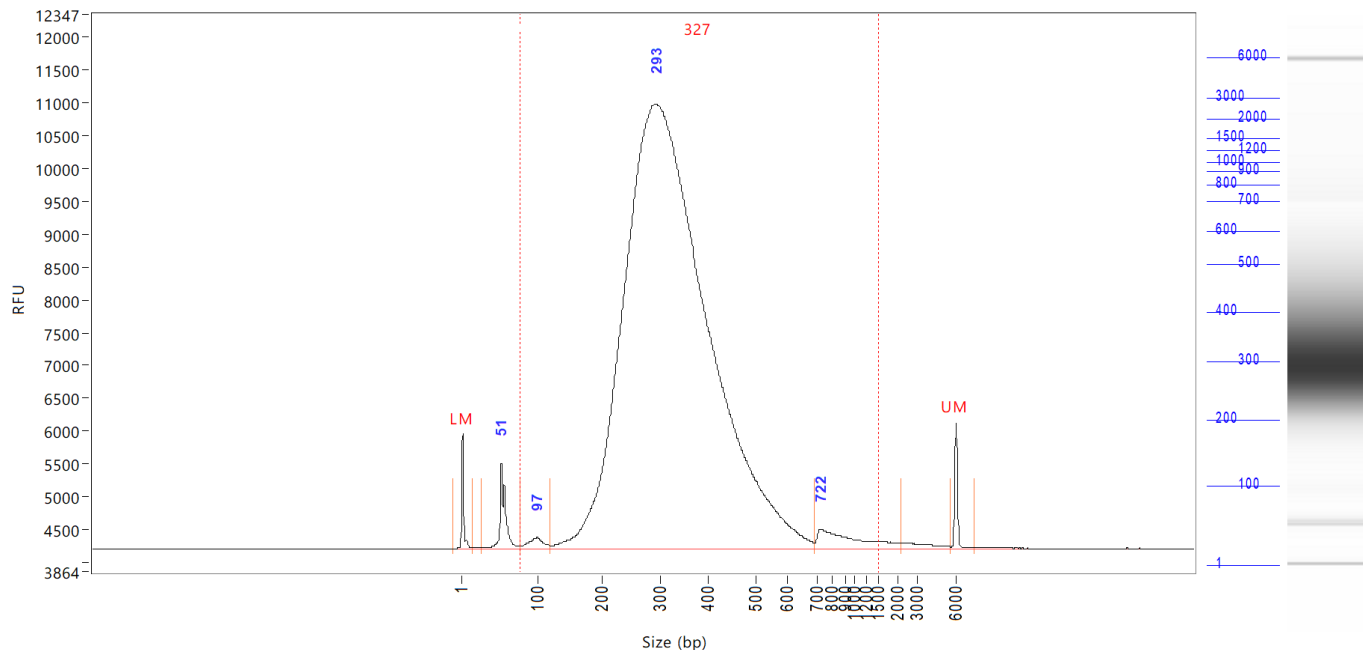

| Peak | Size (bp) | Conc. (ng/uL) | From (bp) | To (bp) | RFU  |
|------|-----------|---------------|-----------|---------|------|
| 1    | 1 (LM)    | 0.0124        | 0         | 15      | 1755 |
| 2    | 51        | 0.2689        | 27        | 76      | 1302 |
| 3    | 97        | 0.0929        | 76        | 118     | 170  |
| 4    | 293       | 15.7427       | 118       | 694     | 6781 |
| 5    | 722       | 0.2410        | 694       | 2201    | 303  |
| 6    | 6000 (UM) | 0.0084        | 5593      | 7364    | 1913 |

TIC: 16.3455 ng/uL  
 TIM: 90.8209 nmole/L  
 Total Conc.: 16.4000 ng/uL

Smear Analysis 75 bp to 1500 bp 16.0383 ng/ul 97.8 %Total 80.7347 nmole/L 327 Avg. Size (b.p.) 33.32 %CV

Sample Peak Width (sec): 50 Sample Min Peak Height: 25 Sample Baseline V to V?: Y Sample Baseline V to V pts: 3  
 Sample Filter: Binomial # of Pts for Filter: 3 Sample Start Region (min): 0 Sample End Region (min): 50  
 Manual Baseline Start (min): 10 Manual Baseline End (min): 48  
 Marker Peak Width (sec): 5 Marker Min Peak Height: 200 Marker Baseline V to V?: Y Marker Baseline V to V pts: 3  
 Lower Marker Selection: First Peak > 200 RFU Upper Marker Selection: Last Peak > 200 RFU  
 Ladder Size (bp): 1, 100, 200, 300, 400, 500, 600, 700, 800, 900, 1000, 1200, 1500, 2000, 3000, 6000  
 Quantification Using: Ladder Final Concentration (ng/uL): 0.0830 Dilution Factor: 12.0

Sample: 103613-001-057

Well Location: A8

Created: Friday, June 21, 2019 2:11:36 PM

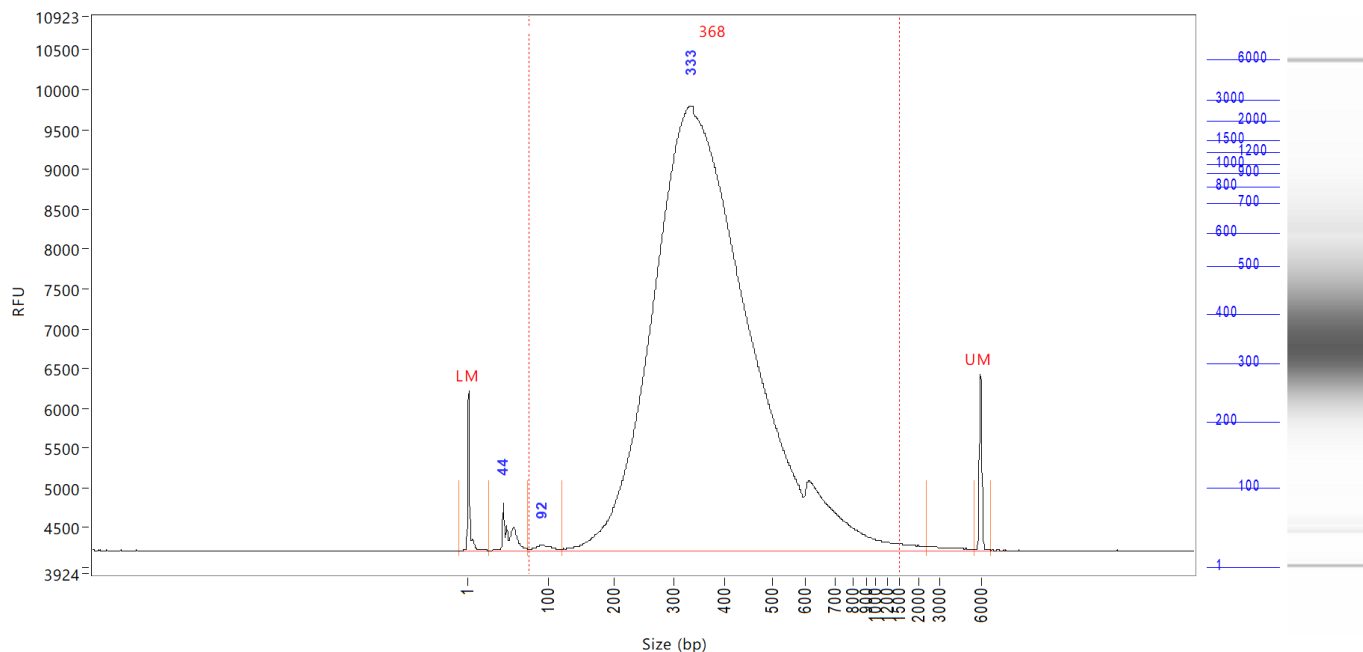

| Peak | Size (bp) | Conc. (ng/uL) | From (bp) | To (bp) | RFU  |
|------|-----------|---------------|-----------|---------|------|
| 1    | 1 (LM)    | 0.0124        | 0         | 28      | 2005 |
| 2    | 44        | 0.1360        | 28        | 75      | 601  |
| 3    | 92        | 0.0367        | 75        | 120     | 73   |
| 4    | 333       | 12.6332       | 120       | 2367    | 5592 |
| 5    | 6000 (UM) | 0.0078        | 5543      | 6758    | 2225 |

TIC: 12.8059 ng/uL  
 TIM: 60.7902 nmole/L  
 Total Conc.: 12.8284 ng/uL

Smear Analysis      75 bp to 1500 bp      12.6429 ng/uL      98.6 %Total      56.4800 nmole/L      368 Avg. Size (b.p.)      32.21 %CV

Sample Peak Width (sec): 50      Sample Min Peak Height: 25      Sample Baseline V to V?: Y      Sample Baseline V to V pts: 3  
 Sample Filter: Binomial      # of Pts for Filter: 3      Sample Start Region (min): 0      Sample End Region (min): 50  
 Manual Baseline Start (min): 10      Manual Baseline End (min): 48  
 Marker Peak Width (sec): 5      Marker Min Peak Height: 200      Marker Baseline V to V?: Y      Marker Baseline V to V pts: 3  
 Lower Marker Selection: First Peak > 200 RFU      Upper Marker Selection: Last Peak > 200 RFU  
 Ladder Size (bp): 1, 100, 200, 300, 400, 500, 600, 700, 800, 900, 1000, 1200, 1500, 2000, 3000, 6000  
 Quantification Using: Ladder      Final Concentration (ng/uL): 0.0830      Dilution Factor: 12.0

Sample: 103613-001-058

Well Location: B8

Created: Friday, June 21, 2019 2:11:36 PM

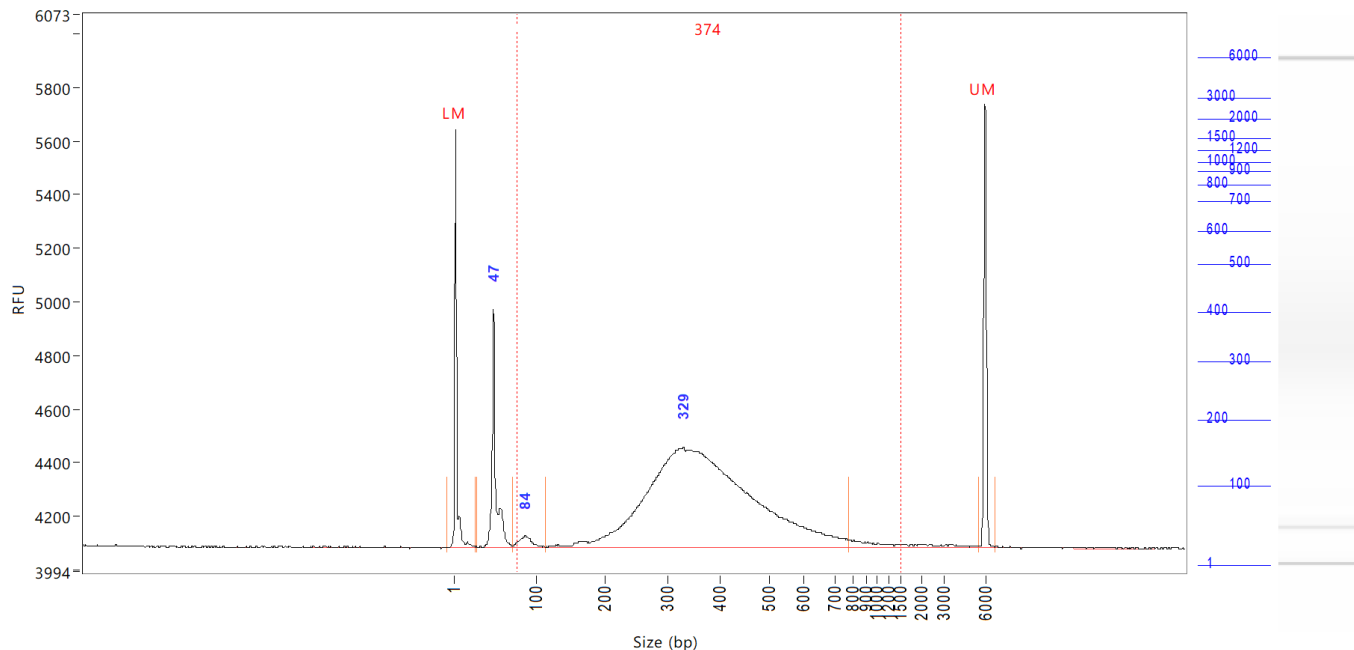

| Peak | Size (bp) | Conc. (ng/uL) | From (bp) | To (bp) | RFU  |
|------|-----------|---------------|-----------|---------|------|
| 1    | 1 (LM)    | 0.0124        | 0         | 26      | 1560 |
| 2    | 47        | 0.1412        | 27        | 71      | 886  |
| 3    | 84        | 0.0223        | 71        | 111     | 43   |
| 4    | 329       | 1.1406        | 111       | 777     | 377  |
| 5    | 6000 (UM) | 0.0075        | 5517      | 6682    | 1659 |

TIC: 1.3041 ng/uL  
 TIM: 10.2346 nmole/L  
 Total Conc.: 1.3363 ng/uL

Smear Analysis      75 bp to 1500 bp      1.1794 ng/uL      88.3 %Total      5.1908 nmole/L      374 Avg. Size (b.p.)      36.75 %CV

Sample Peak Width (sec): 50      Sample Min Peak Height: 25      Sample Baseline V to V?: Y      Sample Baseline V to V pts: 3  
 Sample Filter: Binomial      # of Pts for Filter: 3      Sample Start Region (min): 0      Sample End Region (min): 50  
 Manual Baseline Start (min): 10      Manual Baseline End (min): 48  
 Marker Peak Width (sec): 5      Marker Min Peak Height: 200      Marker Baseline V to V?: Y      Marker Baseline V to V pts: 3  
 Lower Marker Selection: First Peak > 200 RFU      Upper Marker Selection: Last Peak > 200 RFU  
 Ladder Size (bp): 1, 100, 200, 300, 400, 500, 600, 700, 800, 900, 1000, 1200, 1500, 2000, 3000, 6000  
 Quantification Using: Ladder      Final Concentration (ng/uL): 0.0830      Dilution Factor: 12.0

**Sample:** 103613-001-059

**Well Location:** C8

**Created:** Friday, June 21, 2019 2:11:36 PM

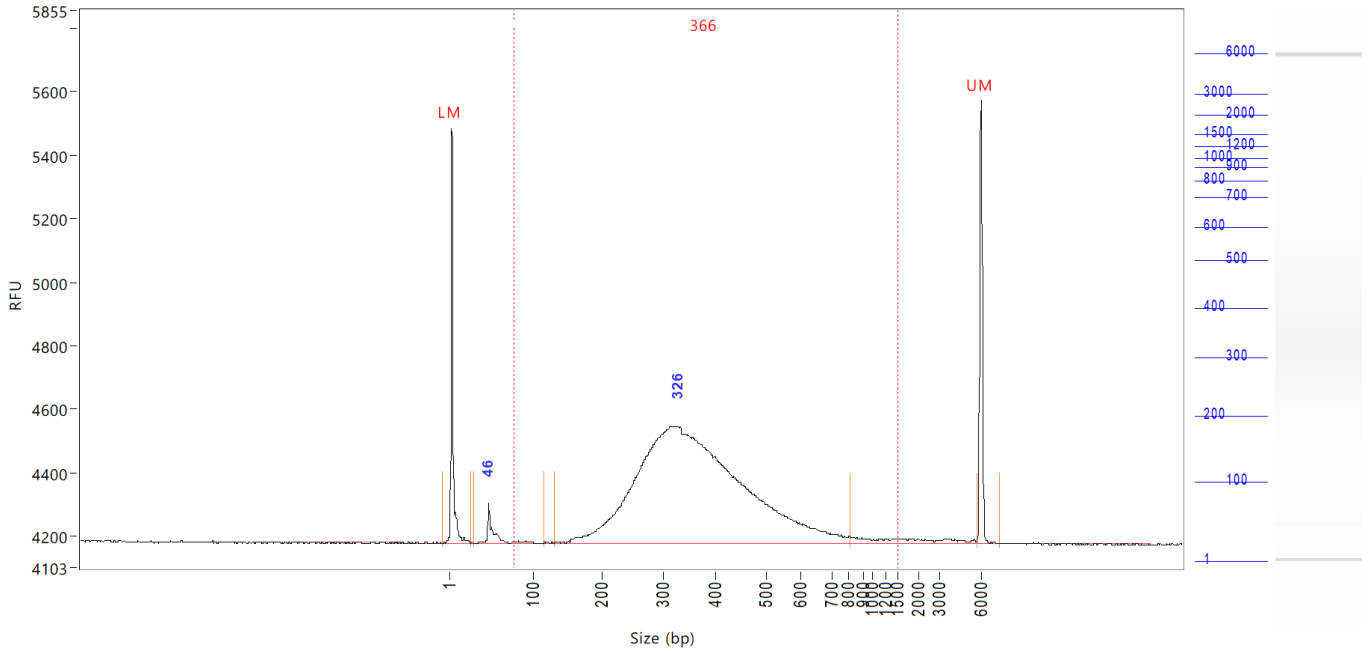

| Peak | Size (bp) | Conc. (ng/uL) | From (bp) | To (bp) | RFU  |
|------|-----------|---------------|-----------|---------|------|
| 1    | 1 (LM)    | 0.0124        | 0         | 26      | 1302 |
| 2    | 46        | 0.0294        | 28        | 115     | 124  |
| 3    | 326       | 1.3231        | 130       | 806     | 368  |
| 4    | 6000 (UM) | 0.0074        | 5670      | 7263    | 1396 |

TIC: 1.3524 ng/uL  
 TIM: 6.9710 nmole/L  
 Total Conc.: 1.3851 ng/uL

Smear Analysis      75 bp to 1500 bp      1.3404 ng/uL      96.8 %Total      6.0308 nmole/L      366 Avg. Size (b.p.)      35.29 %CV

Sample Peak Width (sec): 50      Sample Min Peak Height: 25      Sample Baseline V to V?: Y      Sample Baseline V to V pts: 3  
 Sample Filter: Binomial      # of Pts for Filter: 3      Sample Start Region (min): 0      Sample End Region (min): 50  
 Manual Baseline Start (min): 10      Manual Baseline End (min): 48  
 Marker Peak Width (sec): 5      Marker Min Peak Height: 200      Marker Baseline V to V?: Y      Marker Baseline V to V pts: 3  
 Lower Marker Selection: First Peak > 200 RFU      Upper Marker Selection: Last Peak > 200 RFU  
 Ladder Size (bp): 1, 100, 200, 300, 400, 500, 600, 700, 800, 900, 1000, 1200, 1500, 2000, 3000, 6000  
 Quantification Using: Ladder      Final Concentration (ng/uL): 0.0830      Dilution Factor: 12.0



**Sample:** 103613-001-060

**Well Location:** D8

**Created:** Friday, June 21, 2019 2:11:36 PM

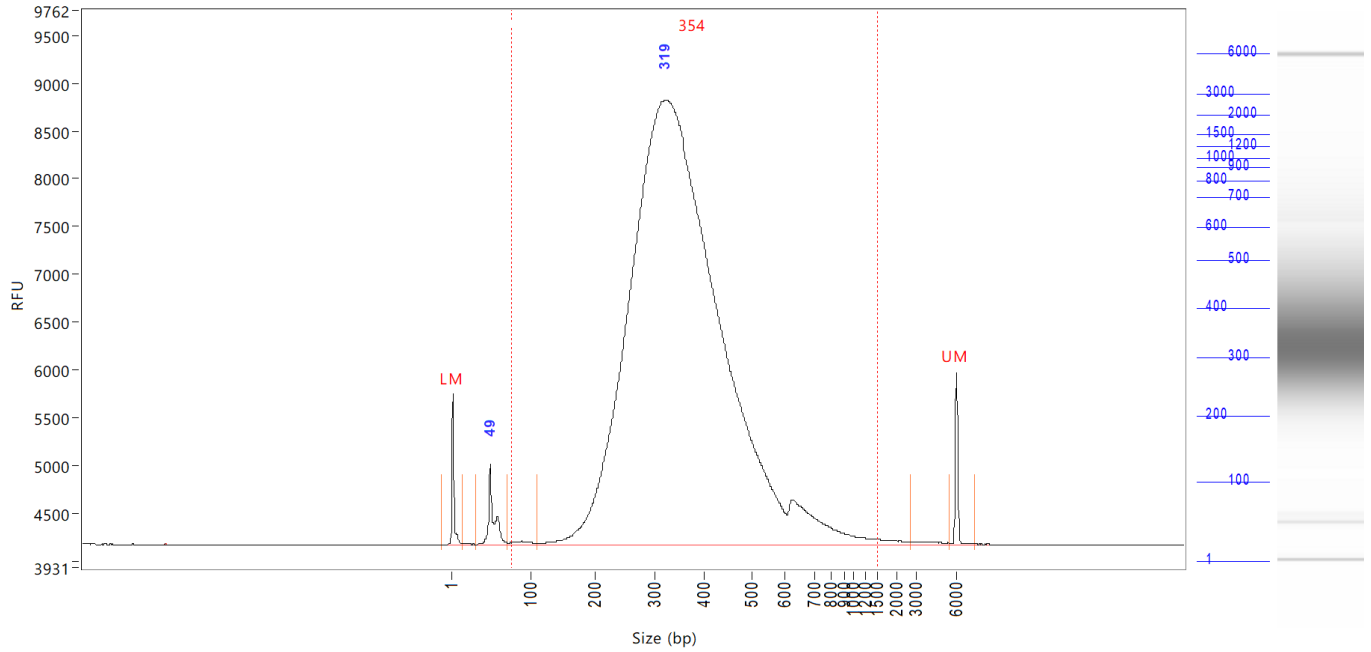

| Peak | Size (bp) | Conc. (ng/uL) | From (bp) | To (bp) | RFU  |
|------|-----------|---------------|-----------|---------|------|
| 1    | 1 (LM)    | 0.0124        | 0         | 14      | 1577 |
| 2    | 49        | 0.1843        | 32        | 71      | 846  |
| 3    | 319       | 12.6735       | 111       | 2734    | 4660 |
| 4    | 6000 (UM) | 0.0085        | 5466      | 7339    | 1800 |

TIC: 12.8578 ng/uL  
 TIM: 64.2088 nmole/L  
 Total Conc.: 12.9071 ng/uL

Smear Analysis      75 bp to 1500 bp      12.6724 ng/uL      98.2 %Total      58.9463 nmole/L      354 Avg. Size (b.p.)      31.40 %CV

Sample Peak Width (sec): 50      Sample Min Peak Height: 25      Sample Baseline V to V?: Y      Sample Baseline V to V pts: 3  
 Sample Filter: Binomial      # of Pts for Filter: 3      Sample Start Region (min): 0      Sample End Region (min): 50  
 Manual Baseline Start (min): 10      Manual Baseline End (min): 48  
 Marker Peak Width (sec): 5      Marker Min Peak Height: 200      Marker Baseline V to V?: Y      Marker Baseline V to V pts: 3  
 Lower Marker Selection: First Peak > 200 RFU      Upper Marker Selection: Last Peak > 200 RFU  
 Ladder Size (bp): 1, 100, 200, 300, 400, 500, 600, 700, 800, 900, 1000, 1200, 1500, 2000, 3000, 6000  
 Quantification Using: Ladder      Final Concentration (ng/uL): 0.0830      Dilution Factor: 12.0

Sample: 103613-001-061

Well Location: E8

Created: Friday, June 21, 2019 2:11:36 PM

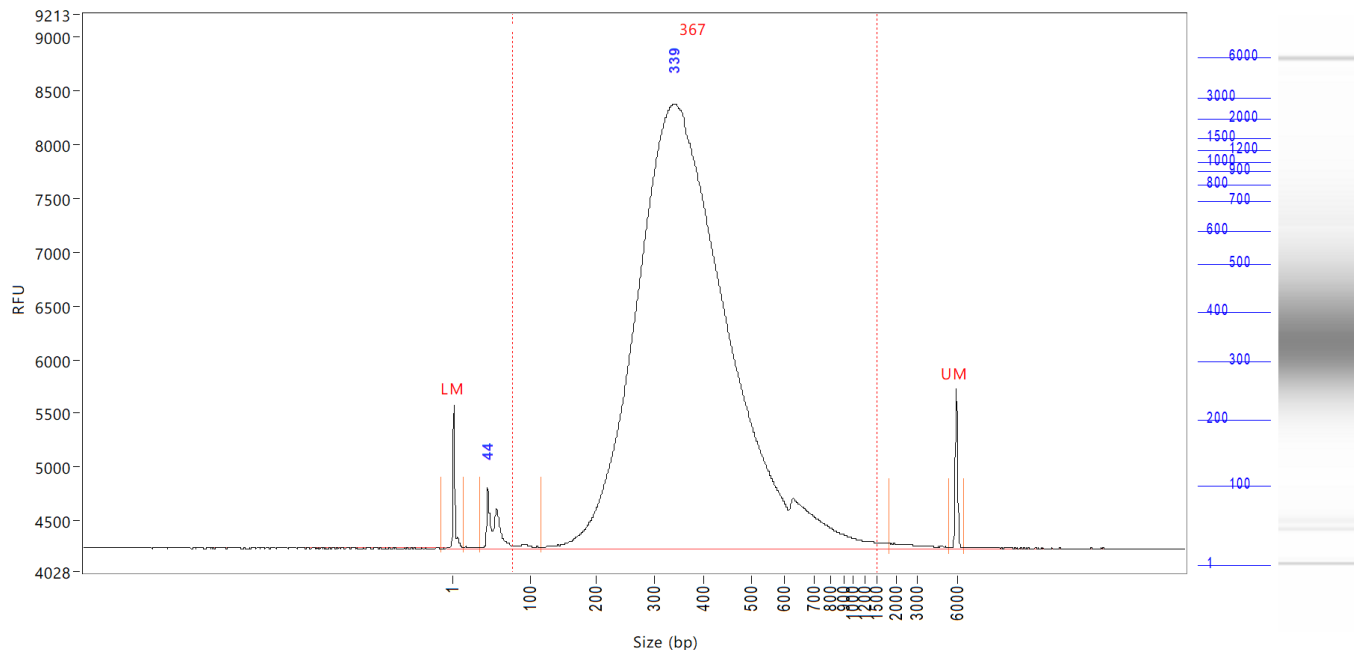

| Peak         | Size (bp) | Conc. (ng/uL) | From (bp) | To (bp) | RFU  |
|--------------|-----------|---------------|-----------|---------|------|
| 1            | 1 (LM)    | 0.0124        | 0         | 15      | 1325 |
| 2            | 44        | 0.2453        | 35        | 115     | 571  |
| 3            | 339       | 13.3039       | 115       | 1813    | 4141 |
| 4            | 6000 (UM) | 0.0082        | 5415      | 6581    | 1488 |
| TIC:         |           | 13.5492       | ng/uL     |         |      |
| TIM:         |           | 66.6564       | nmole/L   |         |      |
| Total Conc.: |           | 13.5908       | ng/uL     |         |      |

Smear Analysis      75 bp to 1500 bp      13.3162 ng/ul      98.0 %Total      59.7602 nmole/L      367 Avg. Size (b.p.)      31.19 %CV

Sample Peak Width (sec): 50      Sample Min Peak Height: 25      Sample Baseline V to V?: Y      Sample Baseline V to V pts: 3  
 Sample Filter: Binomial      # of Pts for Filter: 3      Sample Start Region (min): 0      Sample End Region (min): 50  
 Manual Baseline Start (min): 10      Manual Baseline End (min): 48  
 Marker Peak Width (sec): 5      Marker Min Peak Height: 200      Marker Baseline V to V?: Y      Marker Baseline V to V pts: 3  
 Lower Marker Selection: First Peak > 200 RFU      Upper Marker Selection: Last Peak > 200 RFU  
 Ladder Size (bp): 1, 100, 200, 300, 400, 500, 600, 700, 800, 900, 1000, 1200, 1500, 2000, 3000, 6000  
 Quantification Using: Ladder      Final Concentration (ng/uL): 0.0830      Dilution Factor: 12.0

Sample: 103613-001-062

Well Location: F8

Created: Friday, June 21, 2019 2:11:36 PM

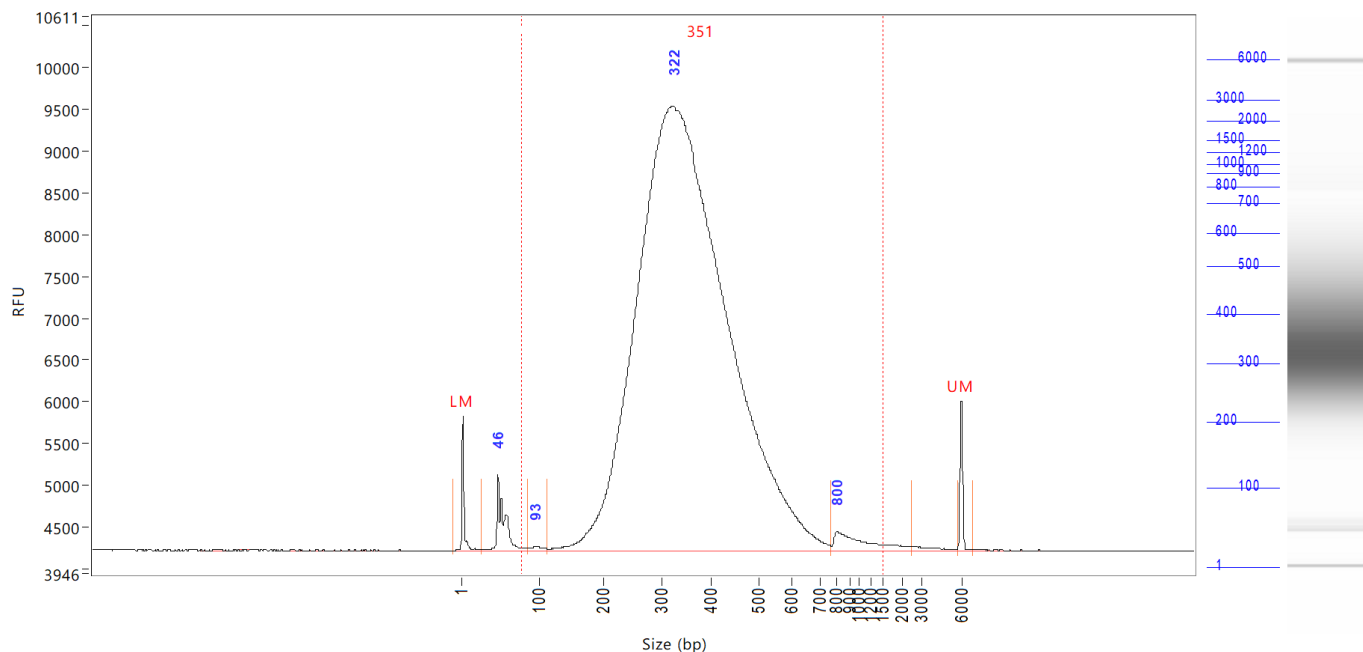

| Peak | Size (bp) | Conc. (ng/uL) | From (bp) | To (bp) | RFU  |
|------|-----------|---------------|-----------|---------|------|
| 1    | 1 (LM)    | 0.0124        | 0         | 26      | 1611 |
| 2    | 46        | 0.2483        | 26        | 84      | 905  |
| 3    | 93        | 0.0202        | 84        | 111     | 44   |
| 4    | 322       | 13.6600       | 111       | 767     | 5323 |
| 5    | 800       | 0.1563        | 767       | 2467    | 226  |
| 6    | 6000 (UM) | 0.0078        | 5695      | 6834    | 1788 |

TIC: 14.0848 ng/uL  
 TIM: 73.1936 nmole/L  
 Total Conc.: 14.1077 ng/uL

Smear Analysis      75 bp to 1500 bp      13.8120 ng/ul      97.9 %Total      64.7943 nmole/L      351 Avg. Size (b.p.)      30.84 %CV

Sample Peak Width (sec): 50      Sample Min Peak Height: 25      Sample Baseline V to V?: Y      Sample Baseline V to V pts: 3  
 Sample Filter: Binomial      # of Pts for Filter: 3      Sample Start Region (min): 0      Sample End Region (min): 50  
 Manual Baseline Start (min): 10      Manual Baseline End (min): 48  
 Marker Peak Width (sec): 5      Marker Min Peak Height: 200      Marker Baseline V to V?: Y      Marker Baseline V to V pts: 3  
 Lower Marker Selection: First Peak > 200 RFU      Upper Marker Selection: Last Peak > 200 RFU  
 Ladder Size (bp): 1, 100, 200, 300, 400, 500, 600, 700, 800, 900, 1000, 1200, 1500, 2000, 3000, 6000  
 Quantification Using: Ladder      Final Concentration (ng/uL): 0.0830      Dilution Factor: 12.0

Sample: 103613-001-063

Well Location: G8

Created: Friday, June 21, 2019 2:11:36 PM

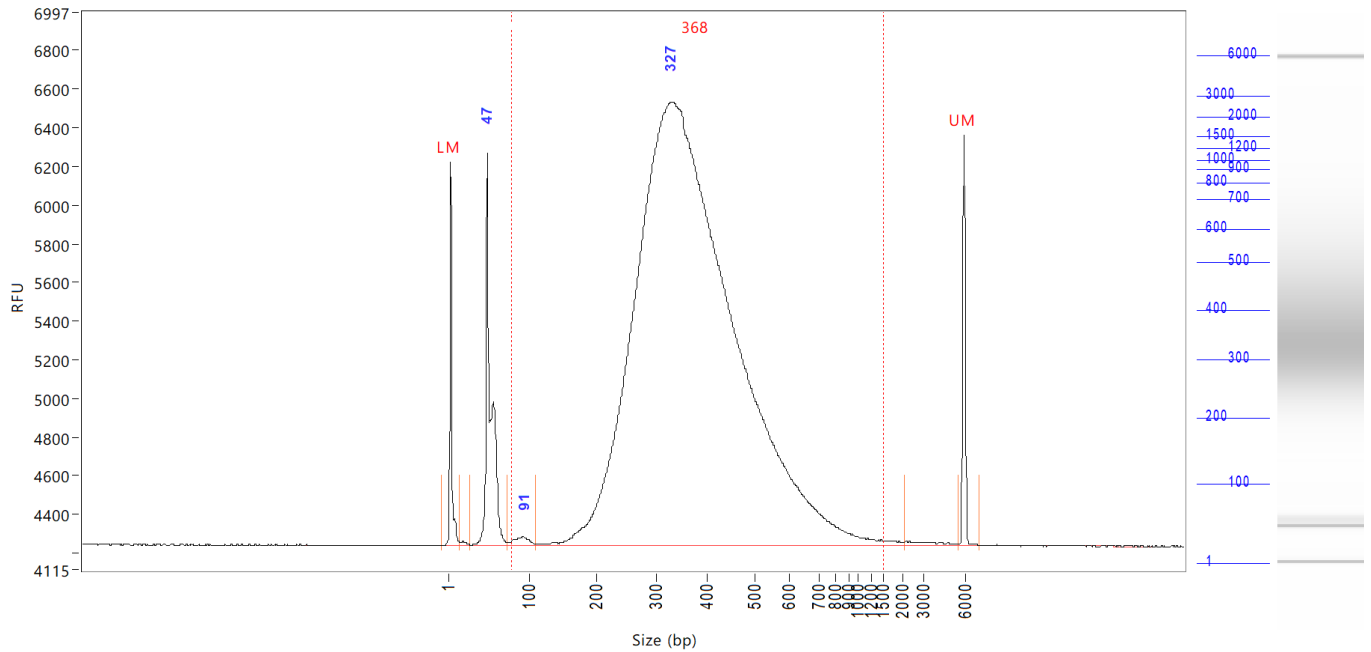

| Peak | Size (bp) | Conc. (ng/uL) | From (bp) | To (bp) | RFU  |
|------|-----------|---------------|-----------|---------|------|
| 1    | 1 (LM)    | 0.0124        | 0         | 14      | 1979 |
| 2    | 47        | 0.3443        | 26        | 72      | 2029 |
| 3    | 91        | 0.0228        | 72        | 109     | 44   |
| 4    | 327       | 5.4479        | 109       | 2068    | 2297 |
| 5    | 6000 (UM) | 0.0079        | 5619      | 7061    | 2124 |

TIC: 5.8150 ng/uL  
 TIM: 35.8675 nmole/L  
 Total Conc.: 5.8320 ng/uL

Smear Analysis      75 bp to 1500 bp      5.4613 ng/uL      93.6 %Total      24.4461 nmole/L      368 Avg. Size (b.p.)      31.47 %CV

Sample Peak Width (sec): 50      Sample Min Peak Height: 25      Sample Baseline V to V?: Y      Sample Baseline V to V pts: 3  
 Sample Filter: Binomial      # of Pts for Filter: 3      Sample Start Region (min): 0      Sample End Region (min): 50  
 Manual Baseline Start (min): 10      Manual Baseline End (min): 48  
 Marker Peak Width (sec): 5      Marker Min Peak Height: 200      Marker Baseline V to V?: Y      Marker Baseline V to V pts: 3  
 Lower Marker Selection: First Peak > 200 RFU      Upper Marker Selection: Last Peak > 200 RFU  
 Ladder Size (bp): 1, 100, 200, 300, 400, 500, 600, 700, 800, 900, 1000, 1200, 1500, 2000, 3000, 6000  
 Quantification Using: Ladder      Final Concentration (ng/uL): 0.0830      Dilution Factor: 12.0

**Sample:** 103613-001-064

**Well Location:** H8

**Created:** Friday, June 21, 2019 2:11:36 PM

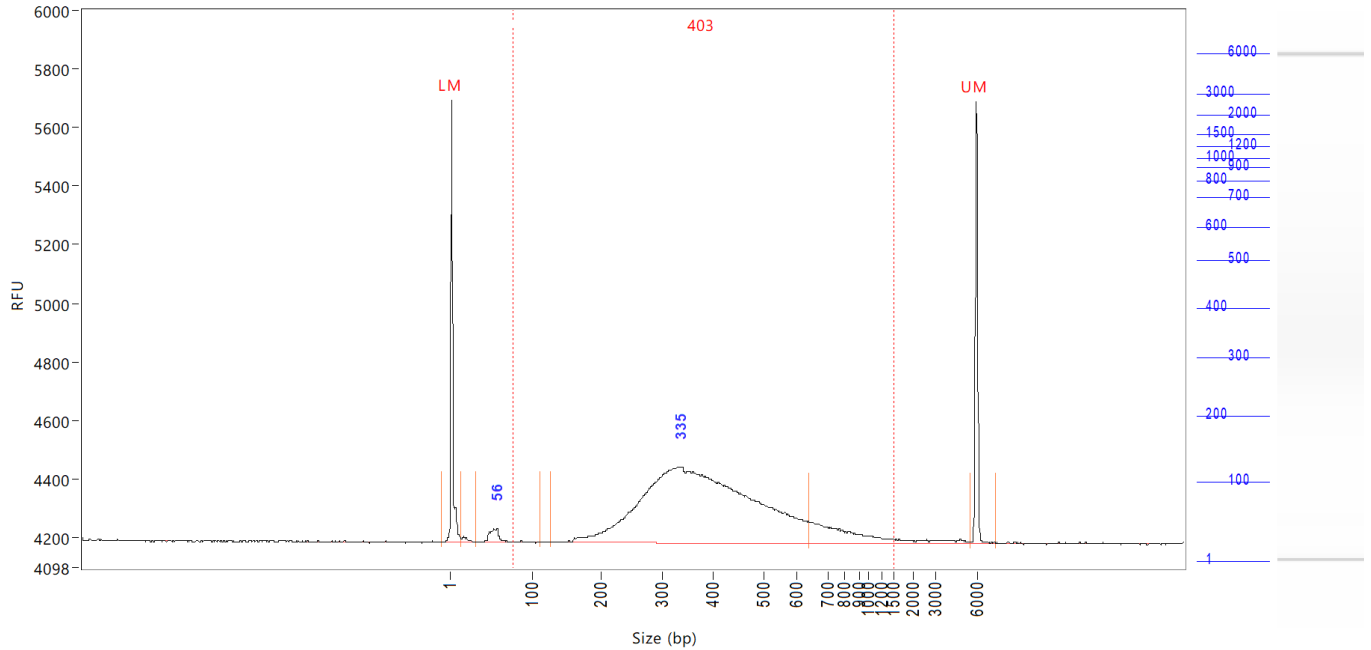

| Peak | Size (bp) | Conc. (ng/uL) | From (bp) | To (bp) | RFU  |
|------|-----------|---------------|-----------|---------|------|
| 1    | 1 (LM)    | 0.0124        | 0         | 14      | 1511 |
| 2    | 56        | 0.0223        | 32        | 110     | 49   |
| 3    | 335       | 0.8790        | 126       | 640     | 261  |
| 4    | 6000 (UM) | 0.0071        | 5593      | 7389    | 1507 |

TIC: 0.9012 ng/uL  
 TIM: 4.5385 nmole/L  
 Total Conc.: 0.9884 ng/uL

Smear Analysis      75 bp to 1500 bp      0.9485 ng/uL      96.0 %Total      3.8766 nmole/L      403 Avg. Size (b.p.)      39.02 %CV

Sample Peak Width (sec): 50      Sample Min Peak Height: 25      Sample Baseline V to V?: Y      Sample Baseline V to V pts: 3  
 Sample Filter: Binomial      # of Pts for Filter: 3      Sample Start Region (min): 0      Sample End Region (min): 50  
 Manual Baseline Start (min): 10      Manual Baseline End (min): 48  
 Marker Peak Width (sec): 5      Marker Min Peak Height: 200      Marker Baseline V to V?: Y      Marker Baseline V to V pts: 3  
 Lower Marker Selection: First Peak > 200 RFU      Upper Marker Selection: Last Peak > 200 RFU  
 Ladder Size (bp): 1, 100, 200, 300, 400, 500, 600, 700, 800, 900, 1000, 1200, 1500, 2000, 3000, 6000  
 Quantification Using: Ladder      Final Concentration (ng/uL): 0.0830      Dilution Factor: 12.0

Sample: 103613-001-065

Well Location: A9

Created: Friday, June 21, 2019 2:11:36 PM

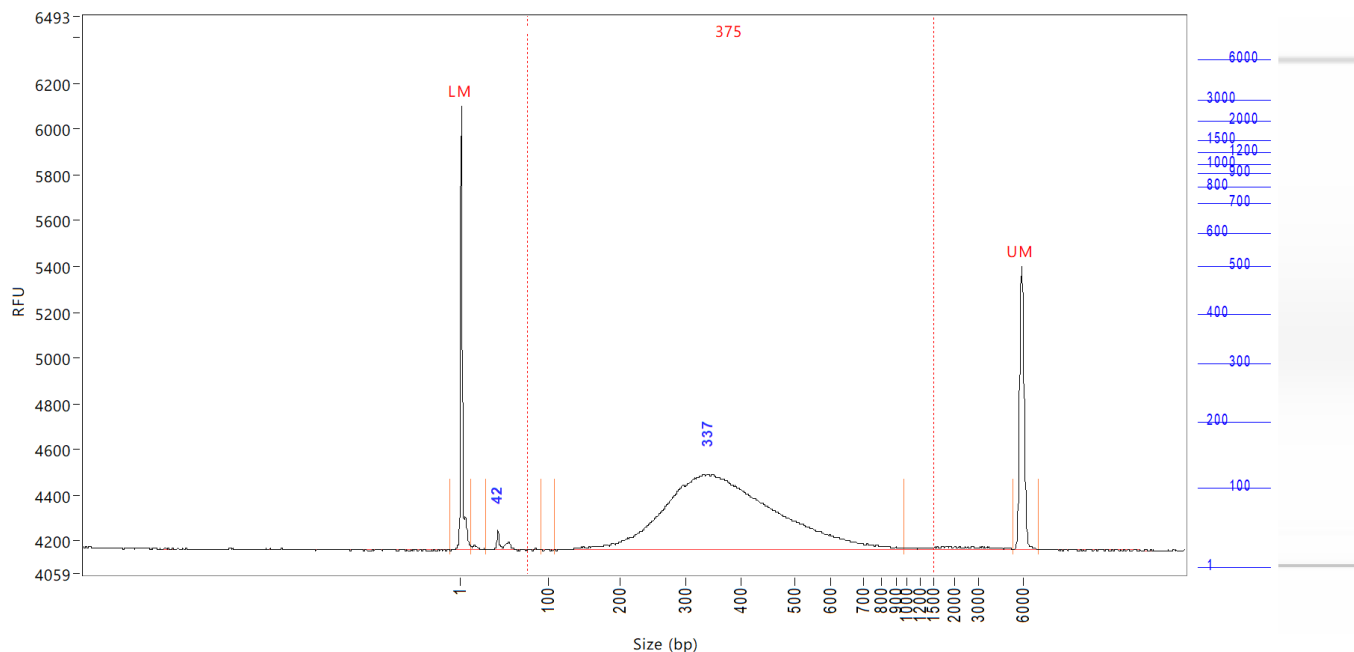

| Peak         | Size (bp) | Conc. (ng/uL) | From (bp) | To (bp) | RFU  |
|--------------|-----------|---------------|-----------|---------|------|
| 1            | 1 (LM)    | 0.0124        | 0         | 13      | 1941 |
| 2            | 42        | 0.0140        | 30        | 92      | 87   |
| 3            | 337       | 0.8391        | 108       | 976     | 329  |
| 4            | 6000 (UM) | 0.0075        | 5415      | 7162    | 1239 |
| TIC:         |           | 0.8531        | ng/uL     |         |      |
| TIM:         |           | 4.1998        | nmole/L   |         |      |
| Total Conc.: |           | 0.8733        | ng/uL     |         |      |

Smear Analysis      75 bp to 1500 bp      0.8433 ng/uL      96.6 %Total      3.6973 nmole/L      375 Avg. Size (b.p.)      33.26 %CV

Sample Peak Width (sec): 50      Sample Min Peak Height: 25      Sample Baseline V to V?: Y      Sample Baseline V to V pts: 3  
 Sample Filter: Binomial      # of Pts for Filter: 3      Sample Start Region (min): 0      Sample End Region (min): 50  
 Manual Baseline Start (min): 10      Manual Baseline End (min): 48  
 Marker Peak Width (sec): 5      Marker Min Peak Height: 200      Marker Baseline V to V?: Y      Marker Baseline V to V pts: 3  
 Lower Marker Selection: First Peak > 200 RFU      Upper Marker Selection: Last Peak > 200 RFU  
 Ladder Size (bp): 1, 100, 200, 300, 400, 500, 600, 700, 800, 900, 1000, 1200, 1500, 2000, 3000, 6000  
 Quantification Using: Ladder      Final Concentration (ng/uL): 0.0830      Dilution Factor: 12.0

Sample: 103613-001-066

Well Location: B9

Created: Friday, June 21, 2019 2:11:36 PM

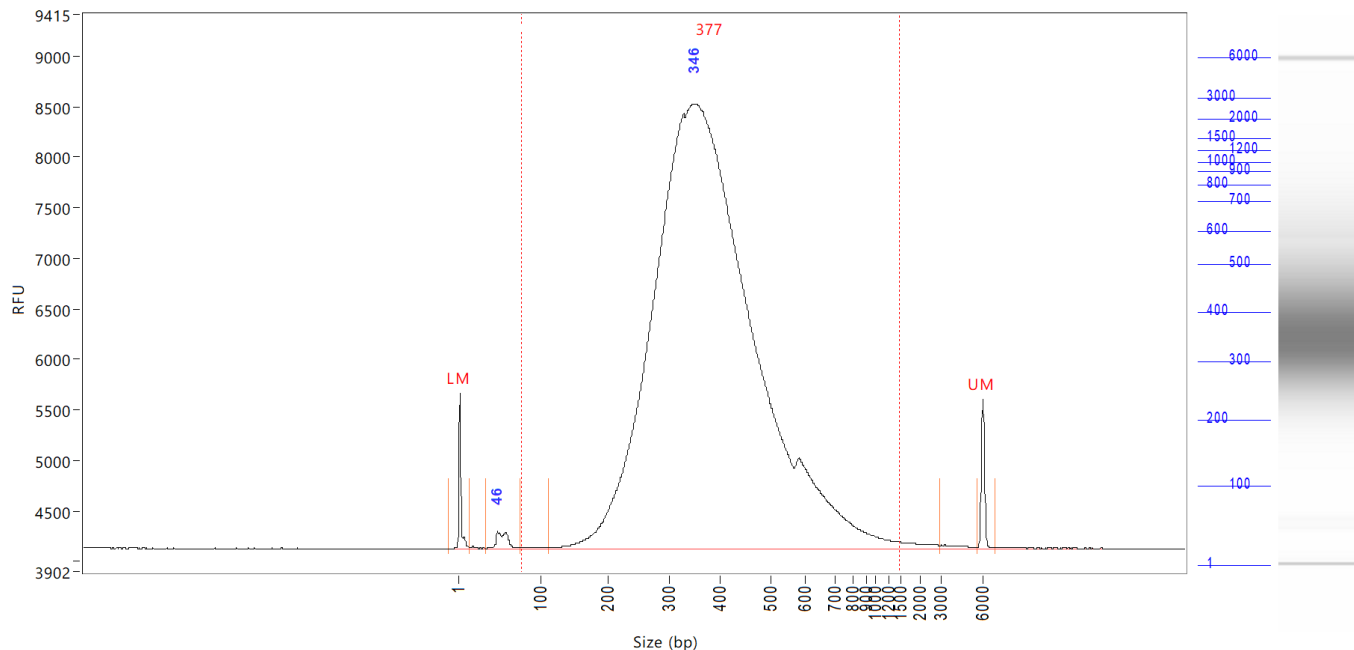

| Peak         | Size (bp) | Conc. (ng/uL) | From (bp) | To (bp) | RFU  |
|--------------|-----------|---------------|-----------|---------|------|
| 1            | 1 (LM)    | 0.0124        | 0         | 14      | 1542 |
| 2            | 46        | 0.0841        | 34        | 74      | 173  |
| 3            | 346       | 12.8808       | 110       | 2917    | 4406 |
| 4            | 6000 (UM) | 0.0083        | 5568      | 6909    | 1486 |
| TIC:         |           | 12.9649       | ng/uL     |         |      |
| TIM:         |           | 58.1256       | nmole/L   |         |      |
| Total Conc.: |           | 12.9977       | ng/uL     |         |      |

Smear Analysis      75 bp to 1500 bp      12.8561 ng/ul      98.9 %Total      56.0885 nmole/L      377 Avg. Size (b.p.)      31.50 %CV

Sample Peak Width (sec): 50      Sample Min Peak Height: 25      Sample Baseline V to V?: Y      Sample Baseline V to V pts: 3  
 Sample Filter: Binomial      # of Pts for Filter: 3      Sample Start Region (min): 0      Sample End Region (min): 50  
 Manual Baseline Start (min): 10      Manual Baseline End (min): 48  
 Marker Peak Width (sec): 5      Marker Min Peak Height: 200      Marker Baseline V to V?: Y      Marker Baseline V to V pts: 3  
 Lower Marker Selection: First Peak > 200 RFU      Upper Marker Selection: Last Peak > 200 RFU  
 Ladder Size (bp): 1, 100, 200, 300, 400, 500, 600, 700, 800, 900, 1000, 1200, 1500, 2000, 3000, 6000  
 Quantification Using: Ladder      Final Concentration (ng/uL): 0.0830      Dilution Factor: 12.0

Sample: 103613-001-067

Well Location: C9

Created: Friday, June 21, 2019 2:11:36 PM

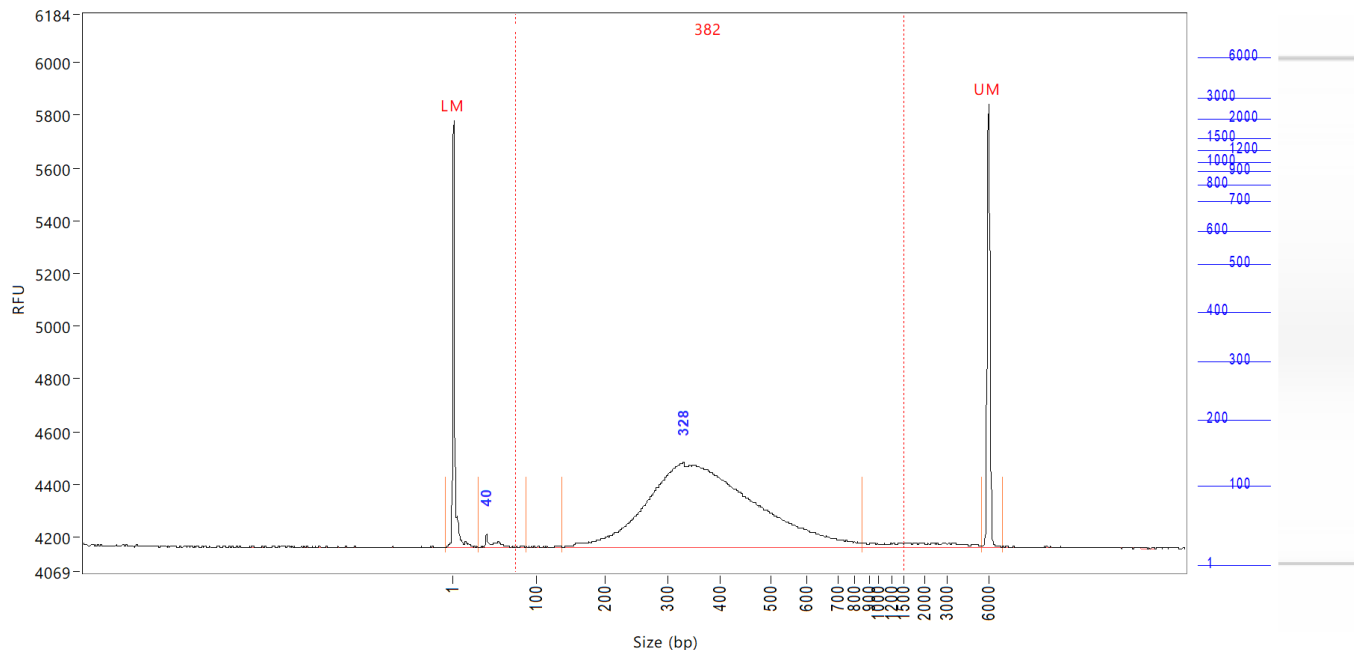

| Peak         | Size (bp) | Conc. (ng/uL) | From (bp) | To (bp) | RFU  |
|--------------|-----------|---------------|-----------|---------|------|
| 1            | 1 (LM)    | 0.0124        | 0         | 31      | 1617 |
| 2            | 40        | 0.0129        | 31        | 87      | 52   |
| 3            | 328       | 0.9505        | 137       | 854     | 321  |
| 4            | 6000 (UM) | 0.0076        | 5543      | 6935    | 1686 |
| TIC:         |           | 0.9633        | ng/uL     |         |      |
| TIM:         |           | 4.6027        | nmole/L   |         |      |
| Total Conc.: |           | 0.9950        | ng/uL     |         |      |

Smear Analysis      75 bp to 1500 bp      0.9638 ng/uL      96.9 %Total      4.1531 nmole/L      382 Avg. Size (b.p.)      35.62 %CV

Sample Peak Width (sec): 50      Sample Min Peak Height: 25      Sample Baseline V to V?: Y      Sample Baseline V to V pts: 3  
 Sample Filter: Binomial      # of Pts for Filter: 3      Sample Start Region (min): 0      Sample End Region (min): 50  
 Manual Baseline Start (min): 10      Manual Baseline End (min): 48  
 Marker Peak Width (sec): 5      Marker Min Peak Height: 200      Marker Baseline V to V?: Y      Marker Baseline V to V pts: 3  
 Lower Marker Selection: First Peak > 200 RFU      Upper Marker Selection: Last Peak > 200 RFU  
 Ladder Size (bp): 1, 100, 200, 300, 400, 500, 600, 700, 800, 900, 1000, 1200, 1500, 2000, 3000, 6000  
 Quantification Using: Ladder      Final Concentration (ng/uL): 0.0830      Dilution Factor: 12.0



**Sample:** 103613-001-068

**Well Location:** D9

**Created:** Friday, June 21, 2019 2:11:36 PM

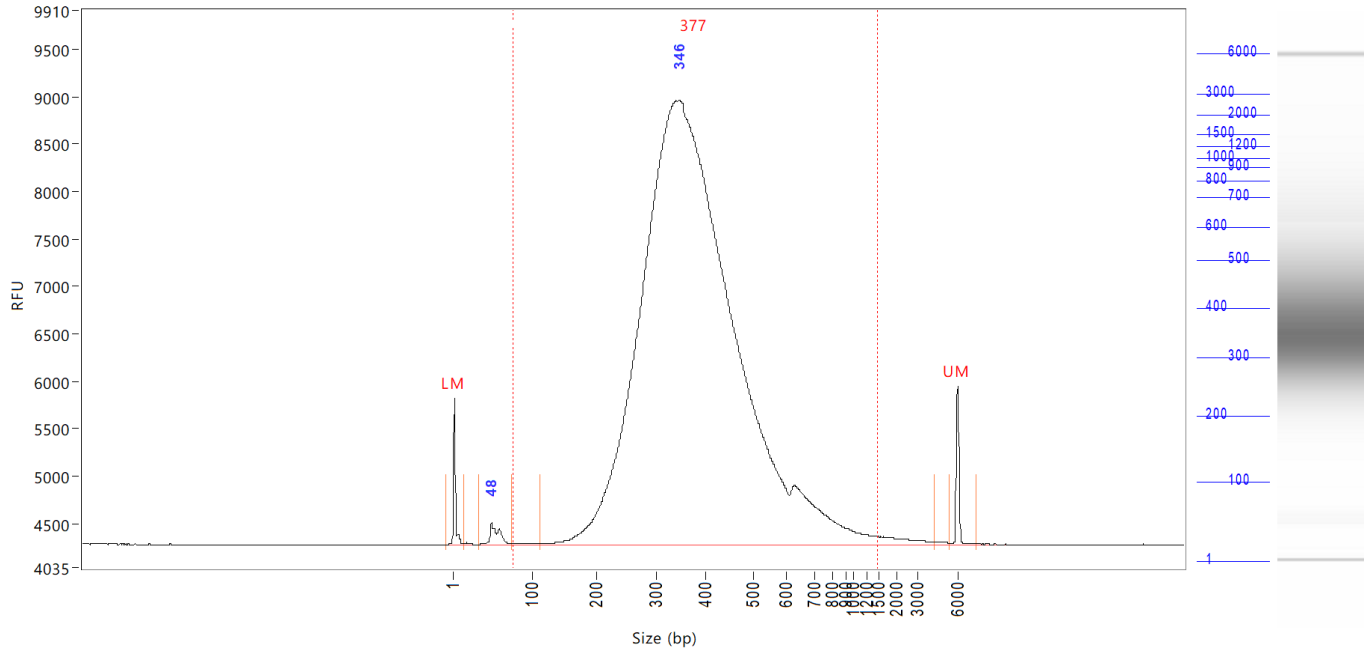

| Peak | Size (bp) | Conc. (ng/uL) | From (bp) | To (bp) | RFU  |
|------|-----------|---------------|-----------|---------|------|
| 1    | 1 (LM)    | 0.0124        | 0         | 15      | 1544 |
| 2    | 48        | 0.0904        | 34        | 74      | 230  |
| 3    | 346       | 13.3757       | 112       | 4221    | 4693 |
| 4    | 6000 (UM) | 0.0086        | 5390      | 7389    | 1672 |

TIC: 13.4661 ng/uL  
 TIM: 59.8072 nmole/L  
 Total Conc.: 13.4881 ng/uL

Smear Analysis      75 bp to 1500 bp      13.3265 ng/uL      98.8 %Total      58.1605 nmole/L      377 Avg. Size (b.p.)      31.72 %CV

Sample Peak Width (sec): 50      Sample Min Peak Height: 25      Sample Baseline V to V?: Y      Sample Baseline V to V pts: 3  
 Sample Filter: Binomial      # of Pts for Filter: 3      Sample Start Region (min): 0      Sample End Region (min): 50  
 Manual Baseline Start (min): 10      Manual Baseline End (min): 48  
 Marker Peak Width (sec): 5      Marker Min Peak Height: 200      Marker Baseline V to V?: Y      Marker Baseline V to V pts: 3  
 Lower Marker Selection: First Peak > 200 RFU      Upper Marker Selection: Last Peak > 200 RFU  
 Ladder Size (bp): 1, 100, 200, 300, 400, 500, 600, 700, 800, 900, 1000, 1200, 1500, 2000, 3000, 6000  
 Quantification Using: Ladder      Final Concentration (ng/uL): 0.0830      Dilution Factor: 12.0

Sample: 103613-001-069

Well Location: E9

Created: Friday, June 21, 2019 2:11:36 PM

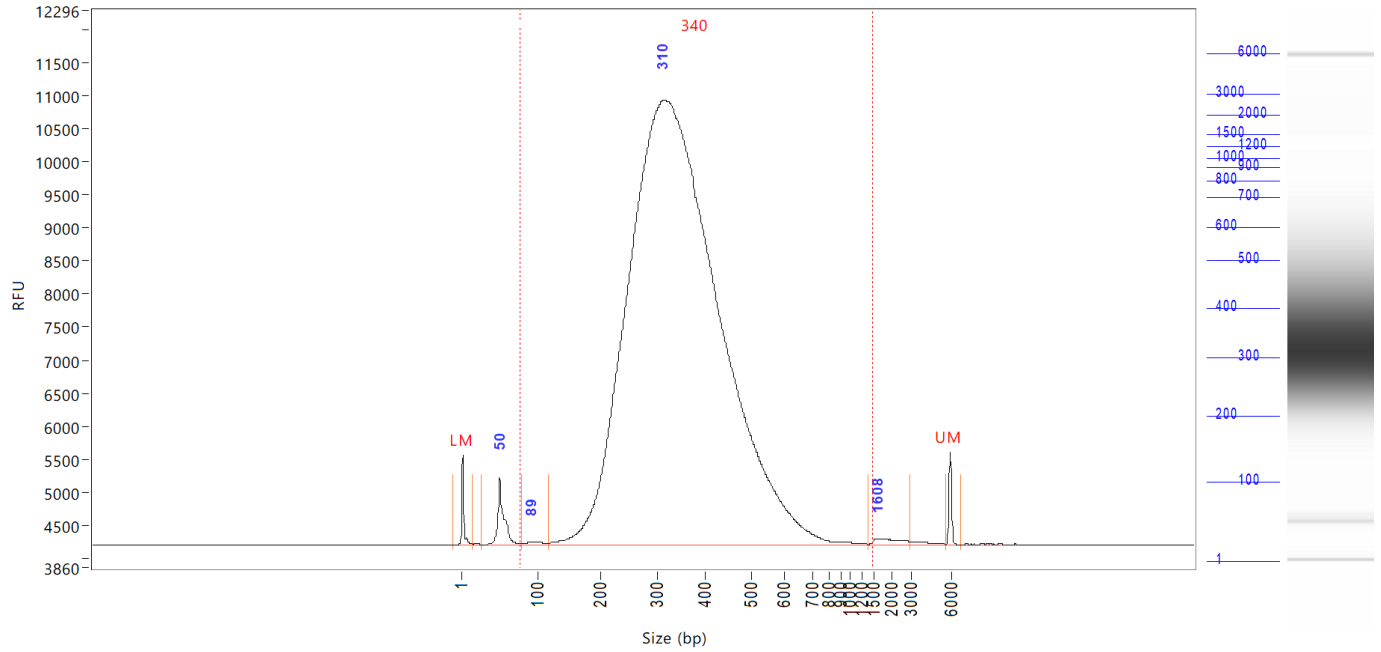

| Peak | Size (bp) | Conc. (ng/uL) | From (bp) | To (bp) | RFU  |
|------|-----------|---------------|-----------|---------|------|
| 1    | 1 (LM)    | 0.0124        | 0         | 16      | 1365 |
| 2    | 50        | 0.3054        | 27        | 79      | 1028 |
| 3    | 89        | 0.0397        | 79        | 118     | 47   |
| 4    | 310       | 21.9774       | 118       | 1373    | 6745 |
| 5    | 1608      | 0.0628        | 1373      | 2967    | 85   |
| 6    | 6000 (UM) | 0.0075        | 5670      | 6859    | 1395 |

TIC: 22.3854 ng/uL  
 TIM: 116.6835 nmole/L  
 Total Conc.: 22.4120 ng/uL

Smear Analysis      75 bp to 1500 bp      22.0210 ng/uL      98.3 %Total      106.5466 nmole/L      340 Avg. Size (b.p.)      27.75 %CV

Sample Peak Width (sec): 50      Sample Min Peak Height: 25      Sample Baseline V to V?: Y      Sample Baseline V to V pts: 3  
 Sample Filter: Binomial      # of Pts for Filter: 3      Sample Start Region (min): 0      Sample End Region (min): 50  
 Manual Baseline Start (min): 10      Manual Baseline End (min): 48  
 Marker Peak Width (sec): 5      Marker Min Peak Height: 200      Marker Baseline V to V?: Y      Marker Baseline V to V pts: 3  
 Lower Marker Selection: First Peak > 200 RFU      Upper Marker Selection: Last Peak > 200 RFU  
 Ladder Size (bp): 1, 100, 200, 300, 400, 500, 600, 700, 800, 900, 1000, 1200, 1500, 2000, 3000, 6000  
 Quantification Using: Ladder      Final Concentration (ng/uL): 0.0830      Dilution Factor: 12.0

**Sample:** 103613-001-070

**Well Location:** F9

**Created:** Friday, June 21, 2019 2:11:36 PM

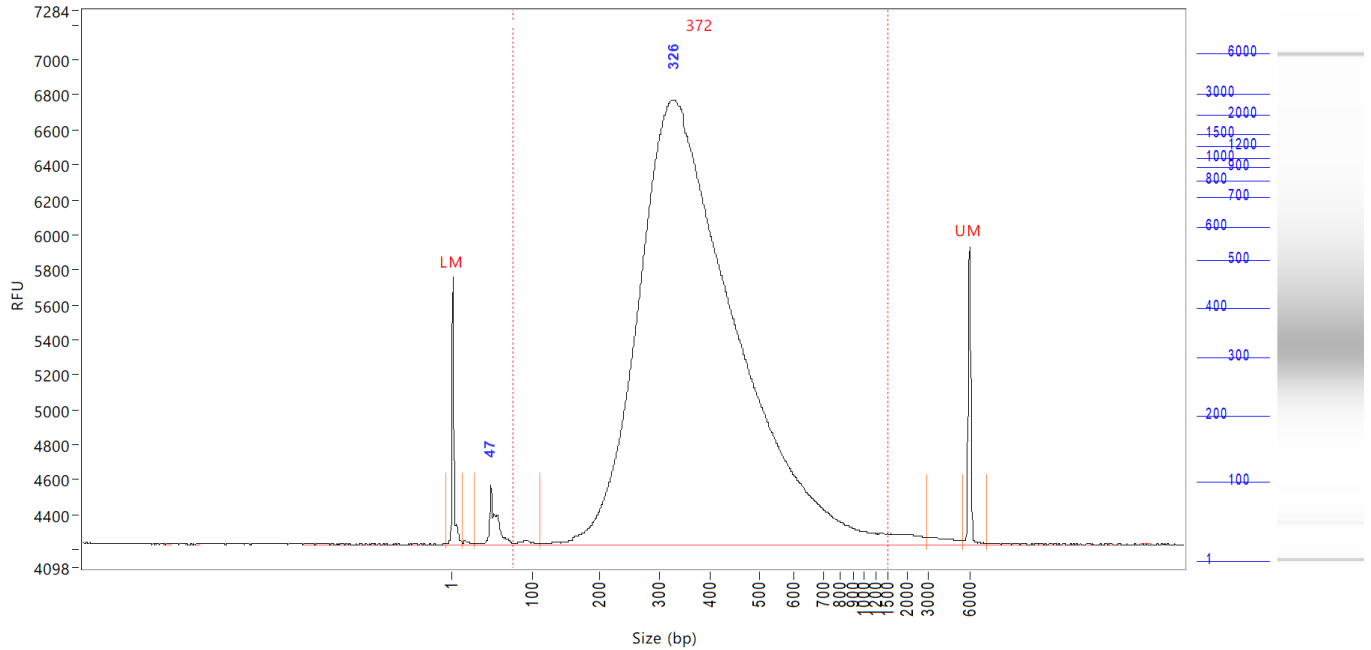

| Peak | Size (bp) | Conc. (ng/uL) | From (bp) | To (bp) | RFU  |
|------|-----------|---------------|-----------|---------|------|
| 1    | 1 (LM)    | 0.0124        | 0         | 14      | 1531 |
| 2    | 47        | 0.1085        | 29        | 111     | 343  |
| 3    | 326       | 7.3158        | 111       | 2933    | 2545 |
| 4    | 6000 (UM) | 0.0080        | 5517      | 7238    | 1703 |

TIC: 7.4242 ng/uL  
 TIM: 34.6272 nmole/L  
 Total Conc.: 7.4506 ng/uL

Smear Analysis      75 bp to 1500 bp      7.2870 ng/uL      97.8 %Total      32.2003 nmole/L      372 Avg. Size (b.p.)      33.00 %CV

Sample Peak Width (sec): 50      Sample Min Peak Height: 25      Sample Baseline V to V?: Y      Sample Baseline V to V pts: 3  
 Sample Filter: Binomial      # of Pts for Filter: 3      Sample Start Region (min): 0      Sample End Region (min): 50  
 Manual Baseline Start (min): 10      Manual Baseline End (min): 48  
 Marker Peak Width (sec): 5      Marker Min Peak Height: 200      Marker Baseline V to V?: Y      Marker Baseline V to V pts: 3  
 Lower Marker Selection: First Peak > 200 RFU      Upper Marker Selection: Last Peak > 200 RFU  
 Ladder Size (bp): 1, 100, 200, 300, 400, 500, 600, 700, 800, 900, 1000, 1200, 1500, 2000, 3000, 6000  
 Quantification Using: Ladder      Final Concentration (ng/uL): 0.0830      Dilution Factor: 12.0

Sample: 103613-001-071

Well Location: G9

Created: Friday, June 21, 2019 2:11:36 PM

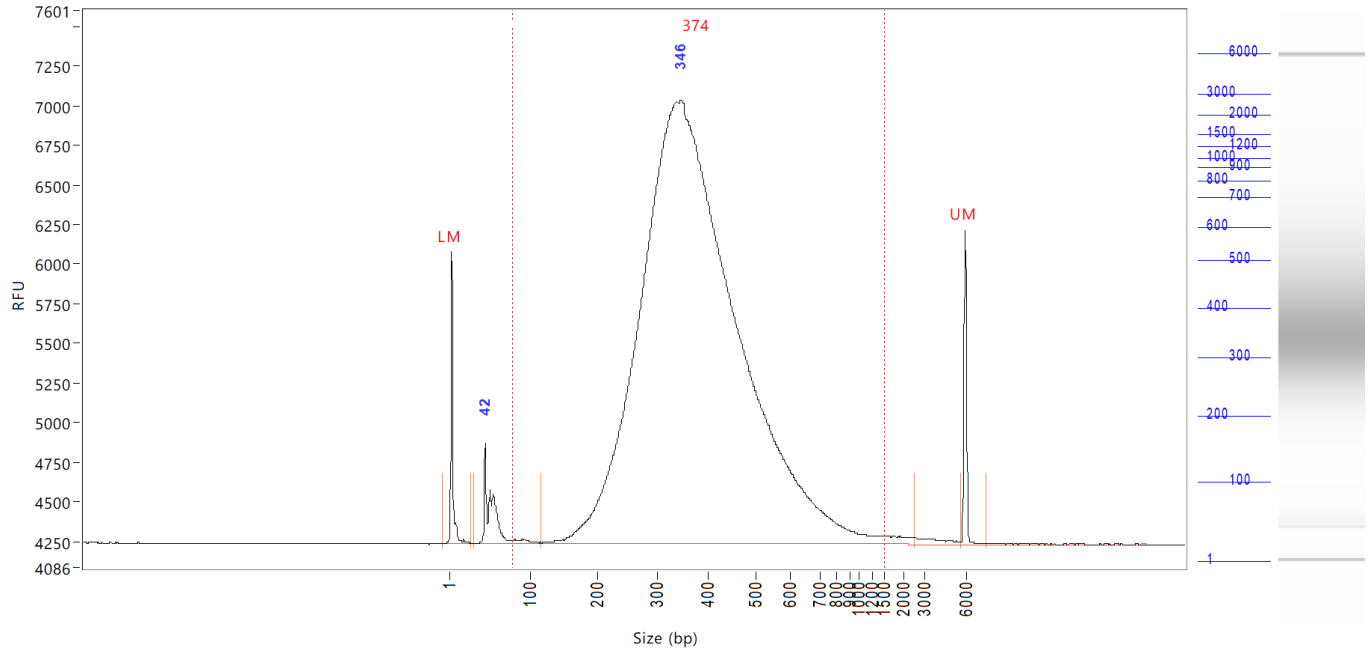

| Peak | Size (bp) | Conc. (ng/uL) | From (bp) | To (bp) | RFU  |
|------|-----------|---------------|-----------|---------|------|
| 1    | 1 (LM)    | 0.0124        | 0         | 26      | 1846 |
| 2    | 42        | 0.1644        | 29        | 115     | 634  |
| 3    | 346       | 6.7812        | 115       | 2534    | 2804 |
| 4    | 6000 (UM) | 0.0077        | 5670      | 7541    | 1977 |

TIC: 6.9456 ng/uL  
 TIM: 34.3469 nmole/L  
 Total Conc.: 6.9654 ng/uL

Smear Analysis      75 bp to 1500 bp      6.7729 ng/uL      97.2 %Total      29.7789 nmole/L      374 Avg. Size (b.p.)      31.70 %CV

Sample Peak Width (sec): 50      Sample Min Peak Height: 25      Sample Baseline V to V?: Y      Sample Baseline V to V pts: 3  
 Sample Filter: Binomial      # of Pts for Filter: 3      Sample Start Region (min): 0      Sample End Region (min): 50  
 Manual Baseline Start (min): 10      Manual Baseline End (min): 48  
 Marker Peak Width (sec): 5      Marker Min Peak Height: 200      Marker Baseline V to V?: Y      Marker Baseline V to V pts: 3  
 Lower Marker Selection: First Peak > 200 RFU      Upper Marker Selection: Last Peak > 200 RFU  
 Ladder Size (bp): 1, 100, 200, 300, 400, 500, 600, 700, 800, 900, 1000, 1200, 1500, 2000, 3000, 6000  
 Quantification Using: Ladder      Final Concentration (ng/uL): 0.0830      Dilution Factor: 12.0

Sample: 103613-001-072

Well Location: H9

Created: Friday, June 21, 2019 2:11:36 PM

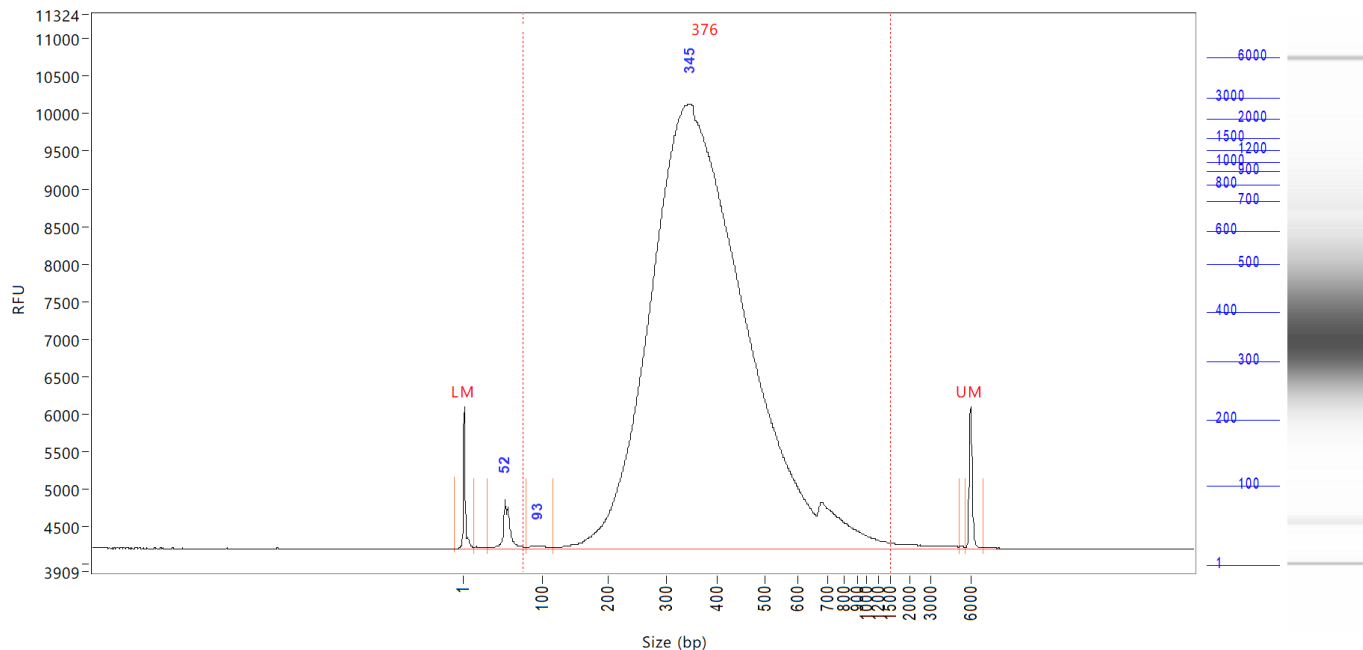

| Peak | Size (bp) | Conc. (ng/uL) | From (bp) | To (bp) | RFU  |
|------|-----------|---------------|-----------|---------|------|
| 1    | 1 (LM)    | 0.0124        | 0         | 14      | 1884 |
| 2    | 52        | 0.1534        | 31        | 79      | 650  |
| 3    | 93        | 0.0209        | 79        | 116     | 40   |
| 4    | 345       | 14.1495       | 116       | 5212    | 5924 |
| 5    | 6000 (UM) | 0.0085        | 5593      | 6960    | 1900 |

TIC: 14.3238 ng/uL  
 TIM: 65.5550 nmole/L  
 Total Conc.: 14.3310 ng/uL

Smear Analysis      75 bp to 1500 bp      14.1217 ng/uL      98.5 %Total      61.8132 nmole/L      376 Avg. Size (b.p.)      31.38 %CV

Sample Peak Width (sec): 50      Sample Min Peak Height: 25      Sample Baseline V to V?: Y      Sample Baseline V to V pts: 3  
 Sample Filter: Binomial      # of Pts for Filter: 3      Sample Start Region (min): 0      Sample End Region (min): 50  
 Manual Baseline Start (min): 10      Manual Baseline End (min): 48  
 Marker Peak Width (sec): 5      Marker Min Peak Height: 200      Marker Baseline V to V?: Y      Marker Baseline V to V pts: 3  
 Lower Marker Selection: First Peak > 200 RFU      Upper Marker Selection: Last Peak > 200 RFU  
 Ladder Size (bp): 1, 100, 200, 300, 400, 500, 600, 700, 800, 900, 1000, 1200, 1500, 2000, 3000, 6000  
 Quantification Using: Ladder      Final Concentration (ng/uL): 0.0830      Dilution Factor: 12.0

Sample: 103613-001-073

Well Location: A10

Created: Friday, June 21, 2019 2:11:36 PM

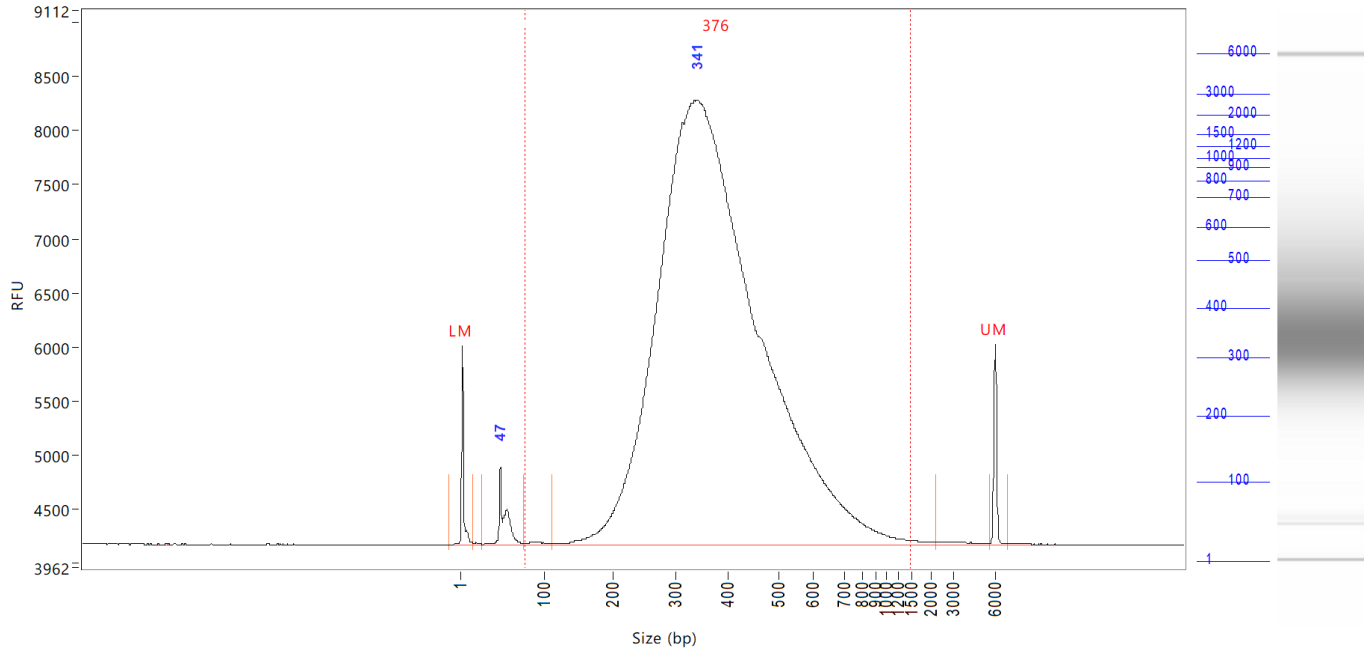

| Peak | Size (bp) | Conc. (ng/uL) | From (bp) | To (bp) | RFU  |
|------|-----------|---------------|-----------|---------|------|
| 1    | 1 (LM)    | 0.0124        | 0         | 15      | 1839 |
| 2    | 47        | 0.1479        | 26        | 74      | 714  |
| 3    | 341       | 10.2593       | 111       | 2251    | 4115 |
| 4    | 6000 (UM) | 0.0081        | 5593      | 6884    | 1852 |

TIC: 10.4072 ng/uL  
 TIM: 49.4044 nmole/L  
 Total Conc.: 10.4428 ng/uL

Smear Analysis      75 bp to 1500 bp      10.2613 ng/ul      98.3 %Total      44.9589 nmole/L      376 Avg. Size (b.p.)      30.83 %CV

Sample Peak Width (sec): 50      Sample Min Peak Height: 25      Sample Baseline V to V?: Y      Sample Baseline V to V pts: 3  
 Sample Filter: Binomial      # of Pts for Filter: 3      Sample Start Region (min): 0      Sample End Region (min): 50  
 Manual Baseline Start (min): 10      Manual Baseline End (min): 48  
 Marker Peak Width (sec): 5      Marker Min Peak Height: 200      Marker Baseline V to V?: Y      Marker Baseline V to V pts: 3  
 Lower Marker Selection: First Peak > 200 RFU      Upper Marker Selection: Last Peak > 200 RFU  
 Ladder Size (bp): 1, 100, 200, 300, 400, 500, 600, 700, 800, 900, 1000, 1200, 1500, 2000, 3000, 6000  
 Quantification Using: Ladder      Final Concentration (ng/uL): 0.0830      Dilution Factor: 12.0

Sample: 103613-001-074

Well Location: B10

Created: Friday, June 21, 2019 2:11:36 PM

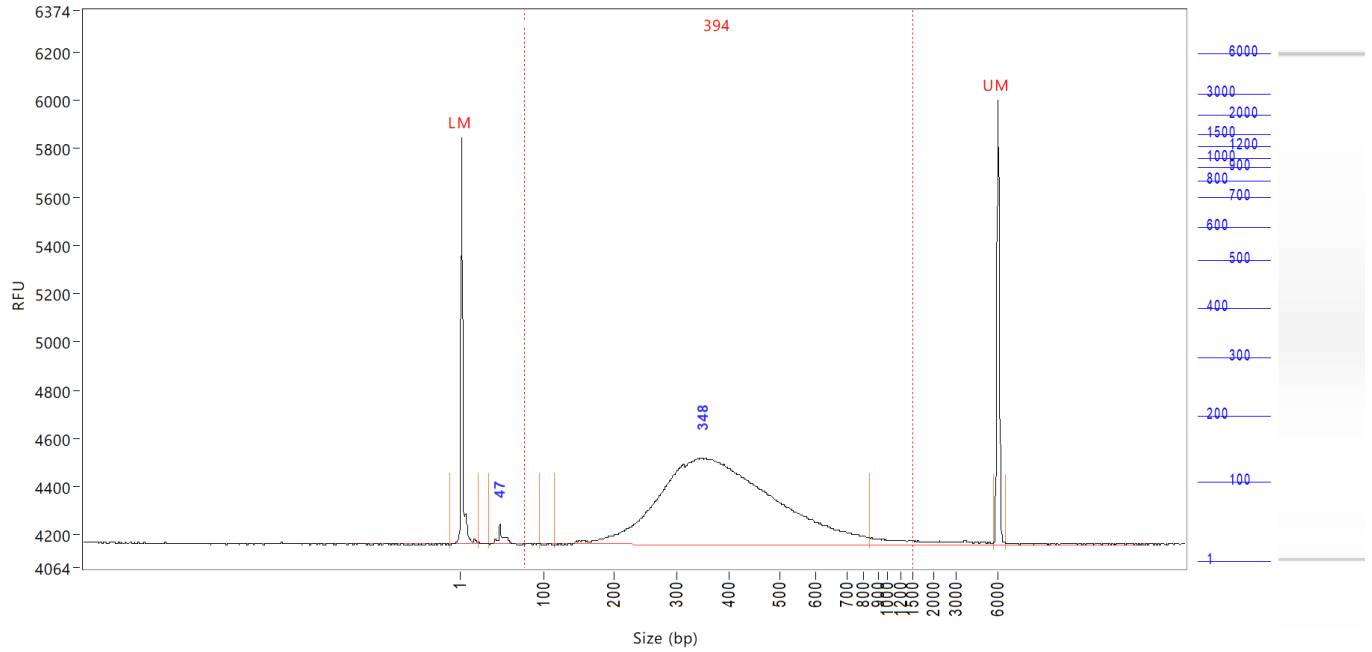

| Peak | Size (bp) | Conc. (ng/uL) | From (bp) | To (bp) | RFU  |
|------|-----------|---------------|-----------|---------|------|
| 1    | 1 (LM)    | 0.0124        | 0         | 21      | 1686 |
| 2    | 47        | 0.0172        | 34        | 95      | 84   |
| 3    | 348       | 1.0716        | 114       | 837     | 358  |
| 4    | 6000 (UM) | 0.0080        | 5670      | 6606    | 1845 |

TIC: 1.0888 ng/uL  
 TIM: 5.1425 nmole/L  
 Total Conc.: 1.1176 ng/uL

Smear Analysis      75 bp to 1500 bp      1.0866 ng/uL      97.2 %Total      4.5403 nmole/L      394 Avg. Size (b.p.)      35.06 %CV

Sample Peak Width (sec): 50      Sample Min Peak Height: 25      Sample Baseline V to V?: Y      Sample Baseline V to V pts: 3  
 Sample Filter: Binomial      # of Pts for Filter: 3      Sample Start Region (min): 0      Sample End Region (min): 50  
 Manual Baseline Start (min): 10      Manual Baseline End (min): 48  
 Marker Peak Width (sec): 5      Marker Min Peak Height: 200      Marker Baseline V to V?: Y      Marker Baseline V to V pts: 3  
 Lower Marker Selection: First Peak > 200 RFU      Upper Marker Selection: Last Peak > 200 RFU  
 Ladder Size (bp): 1, 100, 200, 300, 400, 500, 600, 700, 800, 900, 1000, 1200, 1500, 2000, 3000, 6000  
 Quantification Using: Ladder      Final Concentration (ng/uL): 0.0830      Dilution Factor: 12.0

Sample: 103613-001-075

Well Location: C10

Created: Friday, June 21, 2019 2:11:36 PM

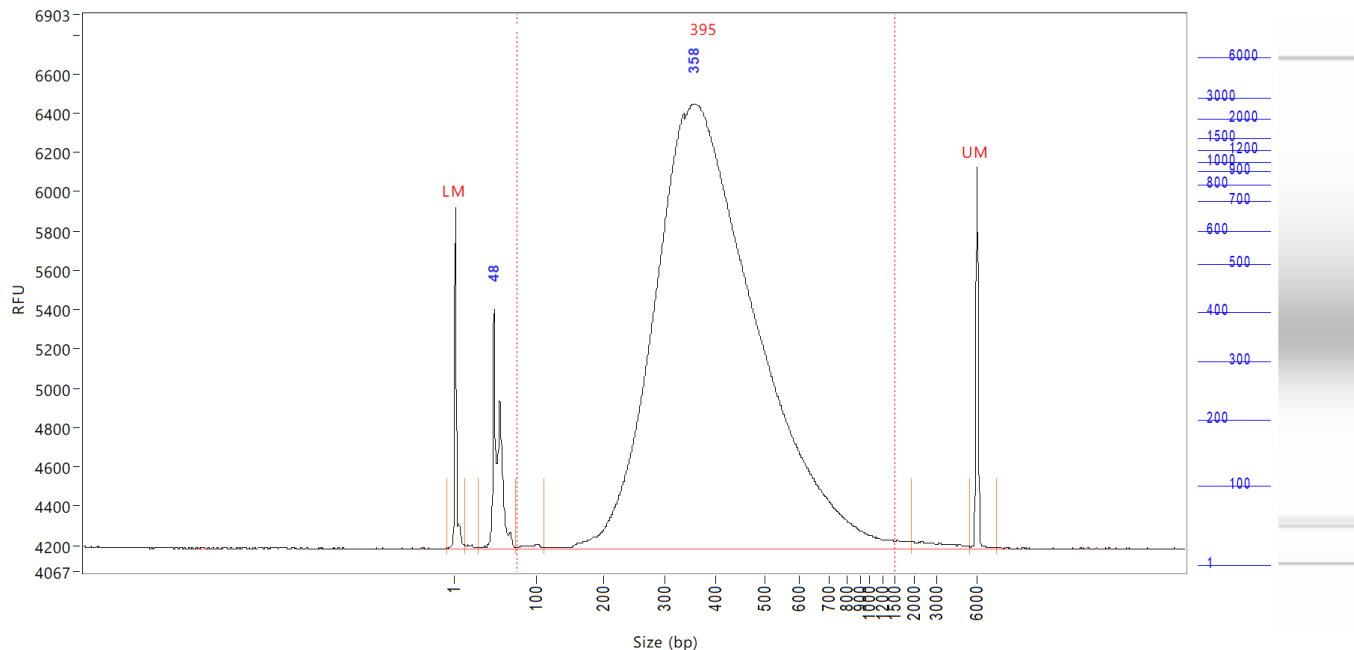

| Peak         | Size (bp) | Conc. (ng/uL) | From (bp) | To (bp) | RFU  |
|--------------|-----------|---------------|-----------|---------|------|
| 1            | 1 (LM)    | 0.0124        | 0         | 15      | 1734 |
| 2            | 48        | 0.2747        | 29        | 75      | 1218 |
| 3            | 358       | 5.9964        | 111       | 1938    | 2266 |
| 4            | 6000 (UM) | 0.0080        | 5517      | 7389    | 1943 |
| TIC:         |           | 6.2711        | ng/uL     |         |      |
| TIM:         |           | 33.2791       | nmole/L   |         |      |
| Total Conc.: |           | 6.3102        | ng/uL     |         |      |

Smear Analysis      75 bp to 1500 bp      5.9970 ng/uL      95.0 %Total      25.0038 nmole/L      395 Avg. Size (b.p.)      30.74 %CV

Sample Peak Width (sec): 50      Sample Min Peak Height: 25      Sample Baseline V to V?: Y      Sample Baseline V to V pts: 3  
 Sample Filter: Binomial      # of Pts for Filter: 3      Sample Start Region (min): 0      Sample End Region (min): 50  
 Manual Baseline Start (min): 10      Manual Baseline End (min): 48  
 Marker Peak Width (sec): 5      Marker Min Peak Height: 200      Marker Baseline V to V?: Y      Marker Baseline V to V pts: 3  
 Lower Marker Selection: First Peak > 200 RFU      Upper Marker Selection: Last Peak > 200 RFU  
 Ladder Size (bp): 1, 100, 200, 300, 400, 500, 600, 700, 800, 900, 1000, 1200, 1500, 2000, 3000, 6000  
 Quantification Using: Ladder      Final Concentration (ng/uL): 0.0830      Dilution Factor: 12.0



**Sample:** 103613-001-076

**Well Location:** D10

**Created:** Friday, June 21, 2019 2:11:36 PM

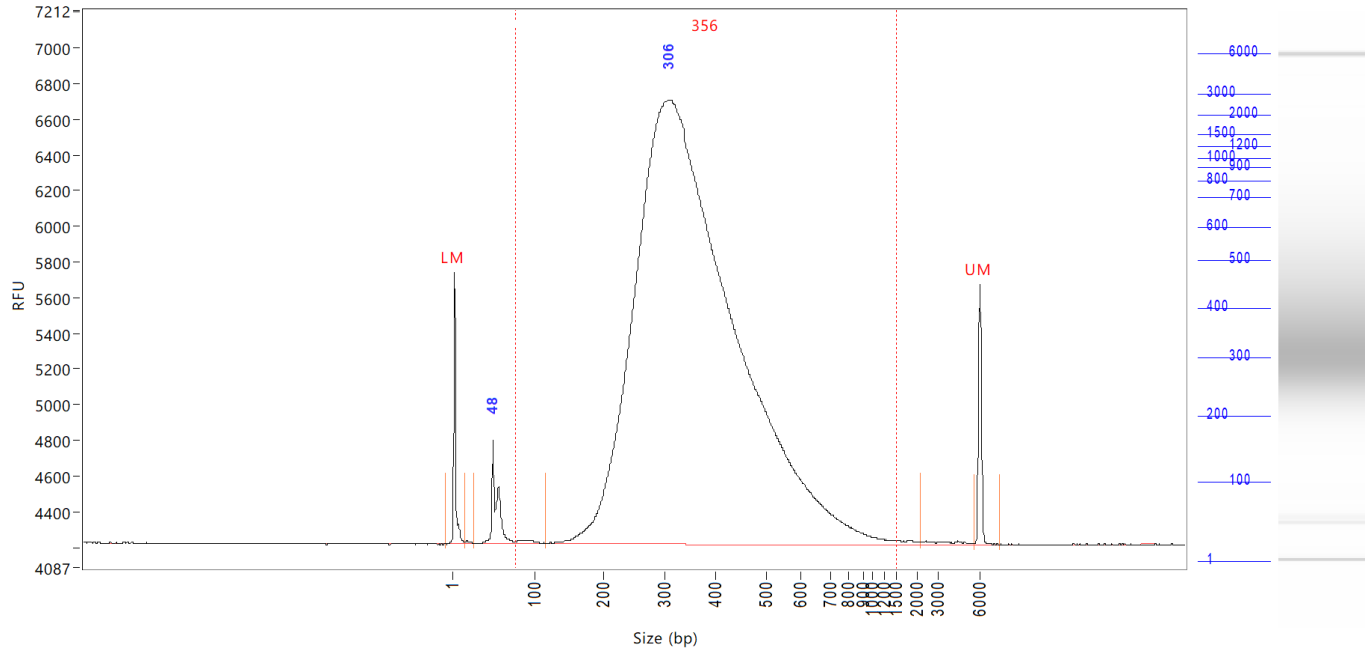

| Peak | Size (bp) | Conc. (ng/uL) | From (bp) | To (bp) | RFU  |
|------|-----------|---------------|-----------|---------|------|
| 1    | 1 (LM)    | 0.0124        | 0         | 14      | 1521 |
| 2    | 48        | 0.1551        | 26        | 114     | 579  |
| 3    | 306       | 7.4241        | 114       | 2184    | 2494 |
| 4    | 6000 (UM) | 0.0077        | 5568      | 7415    | 1457 |

TIC: 7.5792 ng/uL  
 TIM: 38.6560 nmole/L  
 Total Conc.: 7.5949 ng/uL

Smear Analysis      75 bp to 1500 bp      7.4319 ng/uL      97.9 %Total      34.3894 nmole/L      356 Avg. Size (b.p.)      31.87 %CV

Sample Peak Width (sec): 50      Sample Min Peak Height: 25      Sample Baseline V to V?: Y      Sample Baseline V to V pts: 3  
 Sample Filter: Binomial      # of Pts for Filter: 3      Sample Start Region (min): 0      Sample End Region (min): 50  
 Manual Baseline Start (min): 10      Manual Baseline End (min): 48  
 Marker Peak Width (sec): 5      Marker Min Peak Height: 200      Marker Baseline V to V?: Y      Marker Baseline V to V pts: 3  
 Lower Marker Selection: First Peak > 200 RFU      Upper Marker Selection: Last Peak > 200 RFU  
 Ladder Size (bp): 1, 100, 200, 300, 400, 500, 600, 700, 800, 900, 1000, 1200, 1500, 2000, 3000, 6000  
 Quantification Using: Ladder      Final Concentration (ng/uL): 0.0830      Dilution Factor: 12.0

Sample: 103613-001-077

Well Location: E10

Created: Friday, June 21, 2019 2:11:36 PM

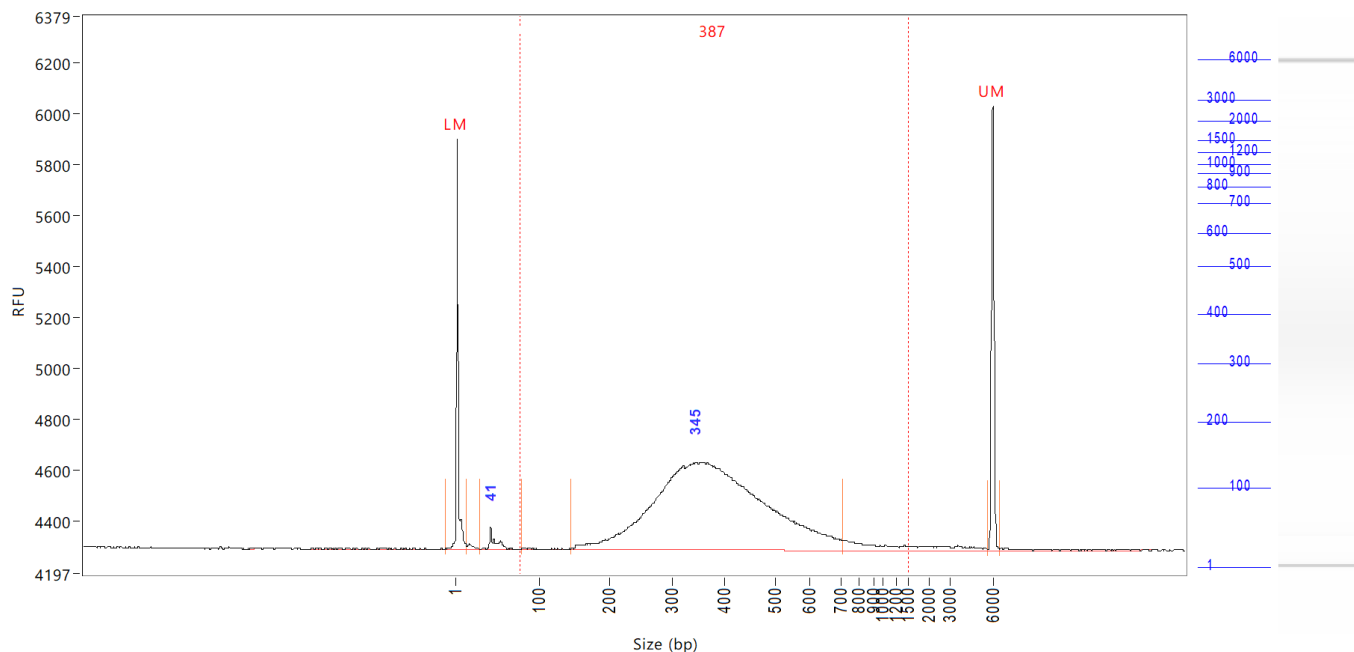

| Peak         | Size (bp) | Conc. (ng/uL) | From (bp) | To (bp) | RFU  |
|--------------|-----------|---------------|-----------|---------|------|
| 1            | 1 (LM)    | 0.0124        | 0         | 13      | 1607 |
| 2            | 41        | 0.0222        | 28        | 79      | 89   |
| 3            | 345       | 1.0894        | 144       | 709     | 343  |
| 4            | 6000 (UM) | 0.0077        | 5619      | 6480    | 1743 |
| TIC:         |           | 1.1116        | ng/uL     |         |      |
| TIM:         |           | 5.5660        | nmole/L   |         |      |
| Total Conc.: |           | 1.1688        | ng/uL     |         |      |

Smear Analysis      75 bp to 1500 bp      1.1220 ng/uL      96.0 %Total      4.7726 nmole/L      387 Avg. Size (b.p.)      35.89 %CV

Sample Peak Width (sec): 50      Sample Min Peak Height: 25      Sample Baseline V to V?: Y      Sample Baseline V to V pts: 3  
 Sample Filter: Binomial      # of Pts for Filter: 3      Sample Start Region (min): 0      Sample End Region (min): 50  
 Manual Baseline Start (min): 10      Manual Baseline End (min): 48  
 Marker Peak Width (sec): 5      Marker Min Peak Height: 200      Marker Baseline V to V?: Y      Marker Baseline V to V pts: 3  
 Lower Marker Selection: First Peak > 200 RFU      Upper Marker Selection: Last Peak > 200 RFU  
 Ladder Size (bp): 1, 100, 200, 300, 400, 500, 600, 700, 800, 900, 1000, 1200, 1500, 2000, 3000, 6000  
 Quantification Using: Ladder      Final Concentration (ng/uL): 0.0830      Dilution Factor: 12.0

**Sample:** 103613-001-078

**Well Location:** F10

**Created:** Friday, June 21, 2019 2:11:36 PM

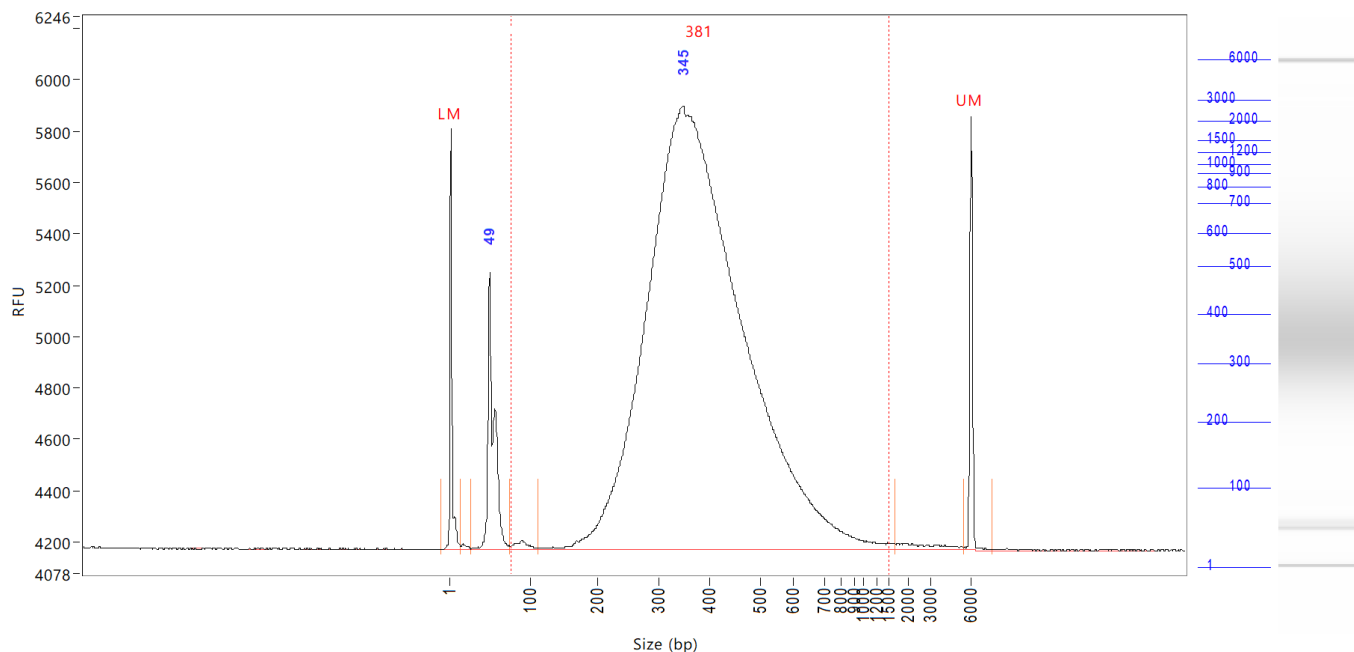

| Peak         | Size (bp) | Conc. (ng/uL) | From (bp) | To (bp) | RFU  |
|--------------|-----------|---------------|-----------|---------|------|
| 1            | 1 (LM)    | 0.0124        | 0         | 15      | 1637 |
| 2            | 49        | 0.2686        | 26        | 74      | 1076 |
| 3            | 345       | 4.5942        | 110       | 1652    | 1728 |
| 4            | 6000 (UM) | 0.0074        | 5441      | 7490    | 1684 |
| TIC:         |           | 4.8628        | ng/uL     |         |      |
| TIM:         |           | 28.1972       | nmole/L   |         |      |
| Total Conc.: |           | 4.9059        | ng/uL     |         |      |

Smear Analysis      75 bp to 1500 bp      4.6076 ng/uL      93.9 %Total      19.9056 nmole/L      381 Avg. Size (b.p.)      30.12 %CV

Sample Peak Width (sec): 50      Sample Min Peak Height: 25      Sample Baseline V to V?: Y      Sample Baseline V to V pts: 3  
 Sample Filter: Binomial      # of Pts for Filter: 3      Sample Start Region (min): 0      Sample End Region (min): 50  
 Manual Baseline Start (min): 10      Manual Baseline End (min): 48  
 Marker Peak Width (sec): 5      Marker Min Peak Height: 200      Marker Baseline V to V?: Y      Marker Baseline V to V pts: 3  
 Lower Marker Selection: First Peak > 200 RFU      Upper Marker Selection: Last Peak > 200 RFU  
 Ladder Size (bp): 1, 100, 200, 300, 400, 500, 600, 700, 800, 900, 1000, 1200, 1500, 2000, 3000, 6000  
 Quantification Using: Ladder      Final Concentration (ng/uL): 0.0830      Dilution Factor: 12.0

Sample: 103613-001-079

Well Location: G10

Created: Friday, June 21, 2019 2:11:36 PM

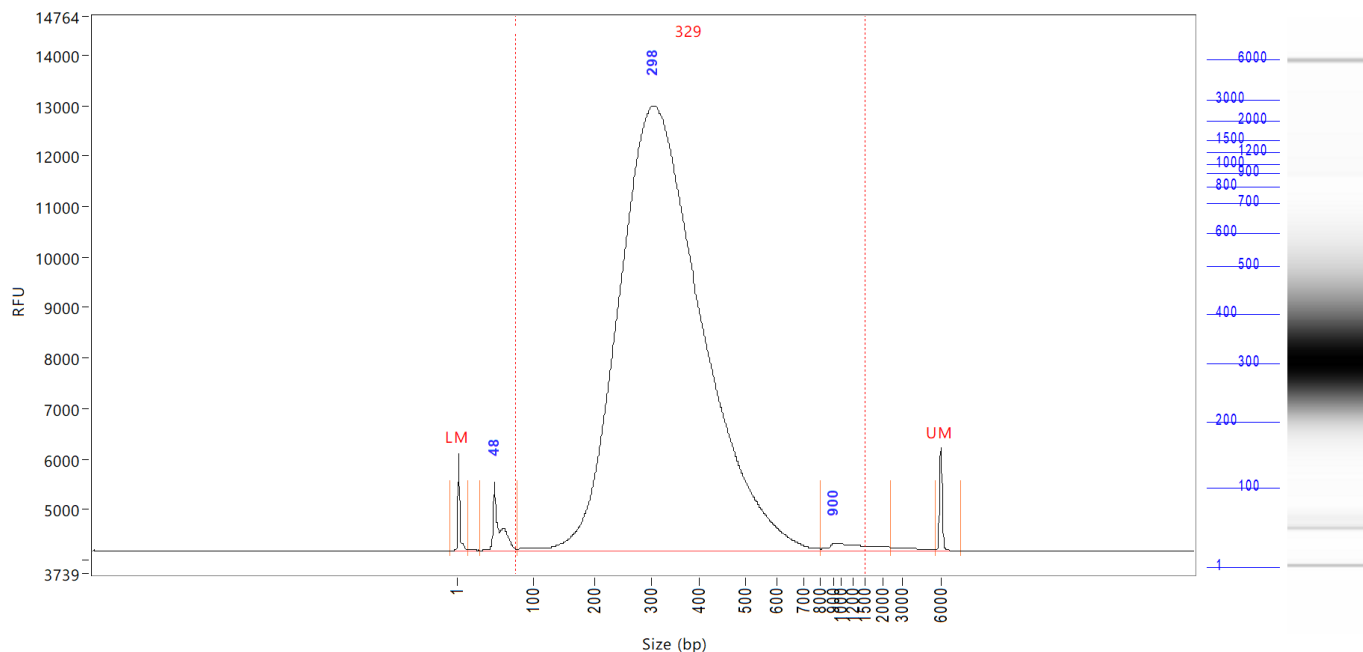

| Peak | Size (bp) | Conc. (ng/uL) | From (bp) | To (bp) | RFU  |
|------|-----------|---------------|-----------|---------|------|
| 1    | 1 (LM)    | 0.0124        | 0         | 15      | 1916 |
| 2    | 48        | 0.2998        | 31        | 78      | 1352 |
| 3    | 298       | 18.5979       | 78        | 804     | 8814 |
| 4    | 900       | 0.1142        | 804       | 2417    | 160  |
| 5    | 6000 (UM) | 0.0082        | 5593      | 7617    | 2052 |

TIC: 19.0119 ng/uL  
 TIM: 102.9239 nmole/L  
 Total Conc.: 19.0488 ng/uL

Smear Analysis      75 bp to 1500 bp      18.6787 ng/uL      98.1 %Total      93.4157 nmole/L      329 Avg. Size (b.p.)      29.82 %CV

Sample Peak Width (sec): 50      Sample Min Peak Height: 25      Sample Baseline V to V?: Y      Sample Baseline V to V pts: 3  
 Sample Filter: Binomial      # of Pts for Filter: 3      Sample Start Region (min): 0      Sample End Region (min): 50  
 Manual Baseline Start (min): 10      Manual Baseline End (min): 48  
 Marker Peak Width (sec): 5      Marker Min Peak Height: 200      Marker Baseline V to V?: Y      Marker Baseline V to V pts: 3  
 Lower Marker Selection: First Peak > 200 RFU      Upper Marker Selection: Last Peak > 200 RFU  
 Ladder Size (bp): 1, 100, 200, 300, 400, 500, 600, 700, 800, 900, 1000, 1200, 1500, 2000, 3000, 6000  
 Quantification Using: Ladder      Final Concentration (ng/uL): 0.0830      Dilution Factor: 12.0

**Sample:** 103613-001-080

**Well Location:** H10

**Created:** Friday, June 21, 2019 2:11:36 PM

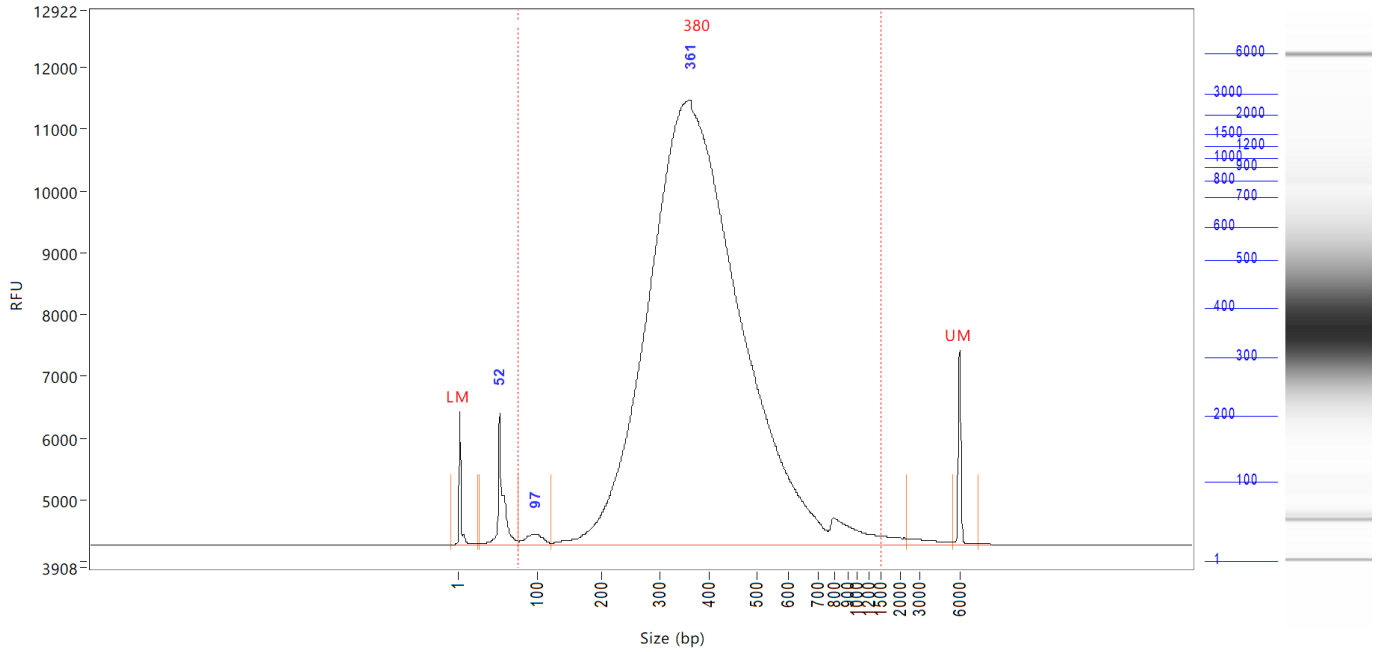

| Peak | Size (bp) | Conc. (ng/uL) | From (bp) | To (bp) | RFU  |
|------|-----------|---------------|-----------|---------|------|
| 1    | 1 (LM)    | 0.0124        | 0         | 26      | 2151 |
| 2    | 52        | 0.3105        | 27        | 76      | 2138 |
| 3    | 97        | 0.0865        | 76        | 122     | 164  |
| 4    | 361       | 14.0777       | 122       | 2384    | 7207 |
| 5    | 6000 (UM) | 0.0108        | 5517      | 7415    | 3157 |

TIC: 14.4747 ng/uL  
 TIM: 70.9032 nmole/L  
 Total Conc.: 14.5166 ng/uL

Smear Analysis      75 bp to 1500 bp      14.1203 ng/uL      97.3 %Total      61.1409 nmole/L      380 Avg. Size (b.p.)      31.60 %CV

Sample Peak Width (sec): 50      Sample Min Peak Height: 25      Sample Baseline V to V?: Y      Sample Baseline V to V pts: 3  
 Sample Filter: Binomial      # of Pts for Filter: 3      Sample Start Region (min): 0      Sample End Region (min): 50  
 Manual Baseline Start (min): 10      Manual Baseline End (min): 48  
 Marker Peak Width (sec): 5      Marker Min Peak Height: 200      Marker Baseline V to V?: Y      Marker Baseline V to V pts: 3  
 Lower Marker Selection: First Peak > 200 RFU      Upper Marker Selection: Last Peak > 200 RFU  
 Ladder Size (bp): 1, 100, 200, 300, 400, 500, 600, 700, 800, 900, 1000, 1200, 1500, 2000, 3000, 6000  
 Quantification Using: Ladder      Final Concentration (ng/uL): 0.0830      Dilution Factor: 12.0

Sample: 103613-001-081

Well Location: A11

Created: Friday, June 21, 2019 2:11:36 PM

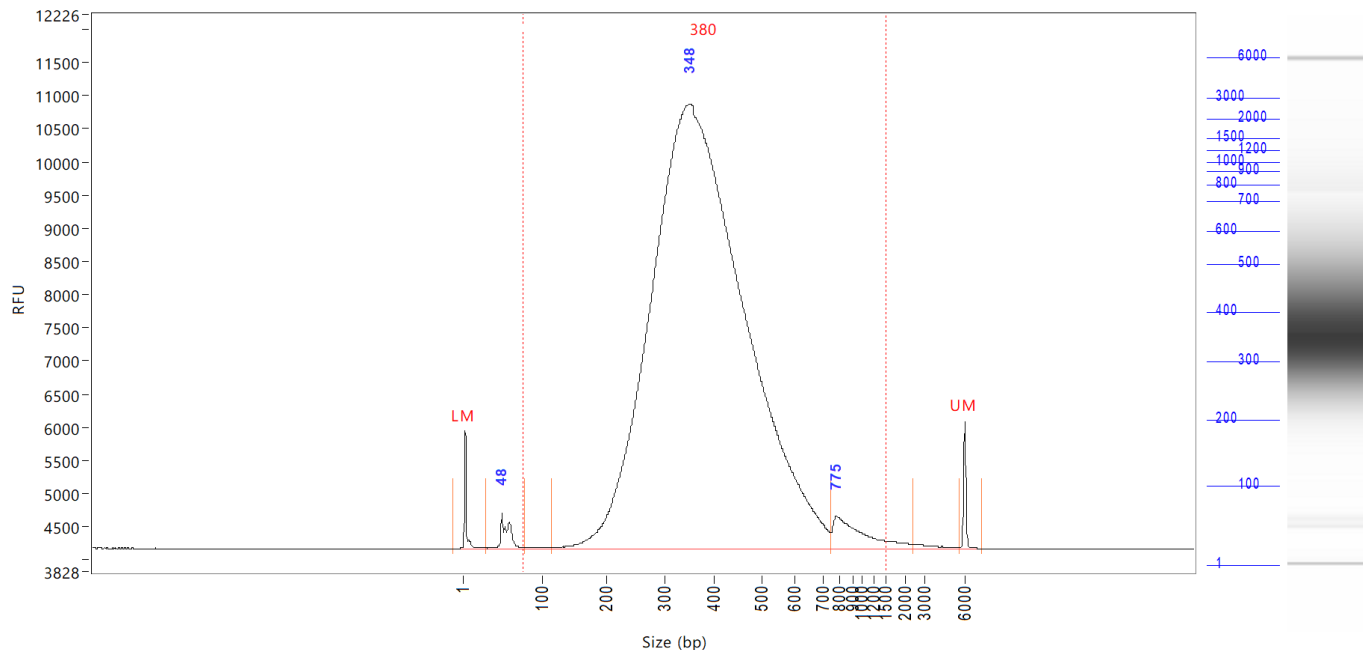

| Peak | Size (bp) | Conc. (ng/uL) | From (bp) | To (bp) | RFU  |
|------|-----------|---------------|-----------|---------|------|
| 1    | 1 (LM)    | 0.0124        | 0         | 29      | 1770 |
| 2    | 48        | 0.1562        | 29        | 78      | 543  |
| 3    | 348       | 16.1599       | 114       | 744     | 6712 |
| 4    | 775       | 0.3095        | 744       | 2384    | 495  |
| 5    | 6000 (UM) | 0.0077        | 5644      | 7238    | 1906 |

TIC: 16.6256 ng/uL  
 TIM: 76.8851 nmole/L  
 Total Conc.: 16.6694 ng/uL

Smear Analysis      75 bp to 1500 bp      16.4410 ng/uL      98.6 %Total      71.1799 nmole/L      380 Avg. Size (b.p.)      31.62 %CV

Sample Peak Width (sec): 50      Sample Min Peak Height: 25      Sample Baseline V to V?: Y      Sample Baseline V to V pts: 3  
 Sample Filter: Binomial      # of Pts for Filter: 3      Sample Start Region (min): 0      Sample End Region (min): 50  
 Manual Baseline Start (min): 10      Manual Baseline End (min): 48  
 Marker Peak Width (sec): 5      Marker Min Peak Height: 200      Marker Baseline V to V?: Y      Marker Baseline V to V pts: 3  
 Lower Marker Selection: First Peak > 200 RFU      Upper Marker Selection: Last Peak > 200 RFU  
 Ladder Size (bp): 1, 100, 200, 300, 400, 500, 600, 700, 800, 900, 1000, 1200, 1500, 2000, 3000, 6000  
 Quantification Using: Ladder      Final Concentration (ng/uL): 0.0830      Dilution Factor: 12.0

Sample: 103613-001-082

Well Location: B11

Created: Friday, June 21, 2019 2:11:36 PM

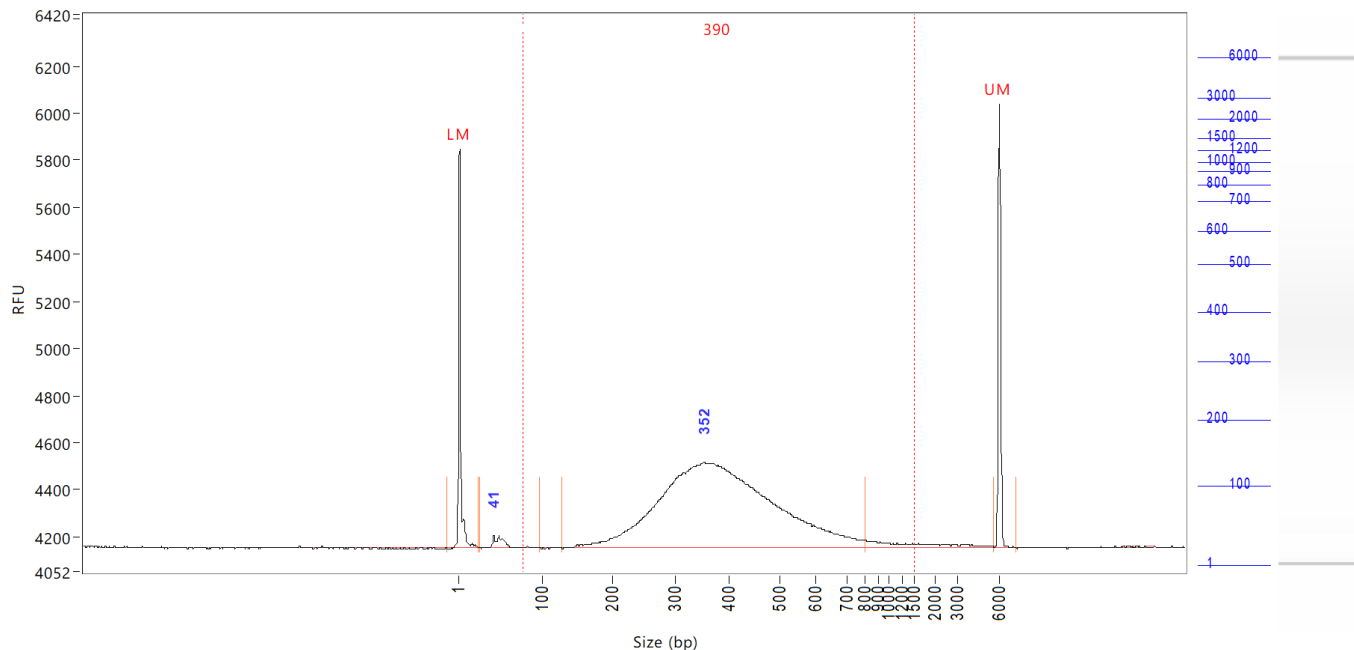

| Peak         | Size (bp) | Conc. (ng/uL) | From (bp) | To (bp) | RFU  |
|--------------|-----------|---------------|-----------|---------|------|
| 1            | 1 (LM)    | 0.0124        | 0         | 24      | 1696 |
| 2            | 41        | 0.0180        | 26        | 96      | 53   |
| 3            | 352       | 1.0708        | 127       | 804     | 363  |
| 4            | 6000 (UM) | 0.0076        | 5593      | 7212    | 1886 |
| TIC:         |           | 1.0888        | ng/uL     |         |      |
| TIM:         |           | 5.2272        | nmole/L   |         |      |
| Total Conc.: |           | 1.1155        | ng/uL     |         |      |

Smear Analysis      75 bp to 1500 bp      1.0862 ng/uL      97.4 %Total      4.5777 nmole/L      390 Avg. Size (b.p.)      34.20 %CV

Sample Peak Width (sec): 50    Sample Min Peak Height: 25    Sample Baseline V to V?: Y    Sample Baseline V to V pts: 3  
 Sample Filter: Binomial    # of Pts for Filter: 3    Sample Start Region (min): 0    Sample End Region (min): 50  
 Manual Baseline Start (min): 10    Manual Baseline End (min): 48  
 Marker Peak Width (sec): 5    Marker Min Peak Height: 200    Marker Baseline V to V?: Y    Marker Baseline V to V pts: 3  
 Lower Marker Selection: First Peak > 200 RFU    Upper Marker Selection: Last Peak > 200 RFU  
 Ladder Size (bp): 1, 100, 200, 300, 400, 500, 600, 700, 800, 900, 1000, 1200, 1500, 2000, 3000, 6000  
 Quantification Using: Ladder    Final Concentration (ng/uL): 0.0830    Dilution Factor: 12.0

Sample: 103613-001-083

Well Location: C11

Created: Friday, June 21, 2019 2:11:36 PM

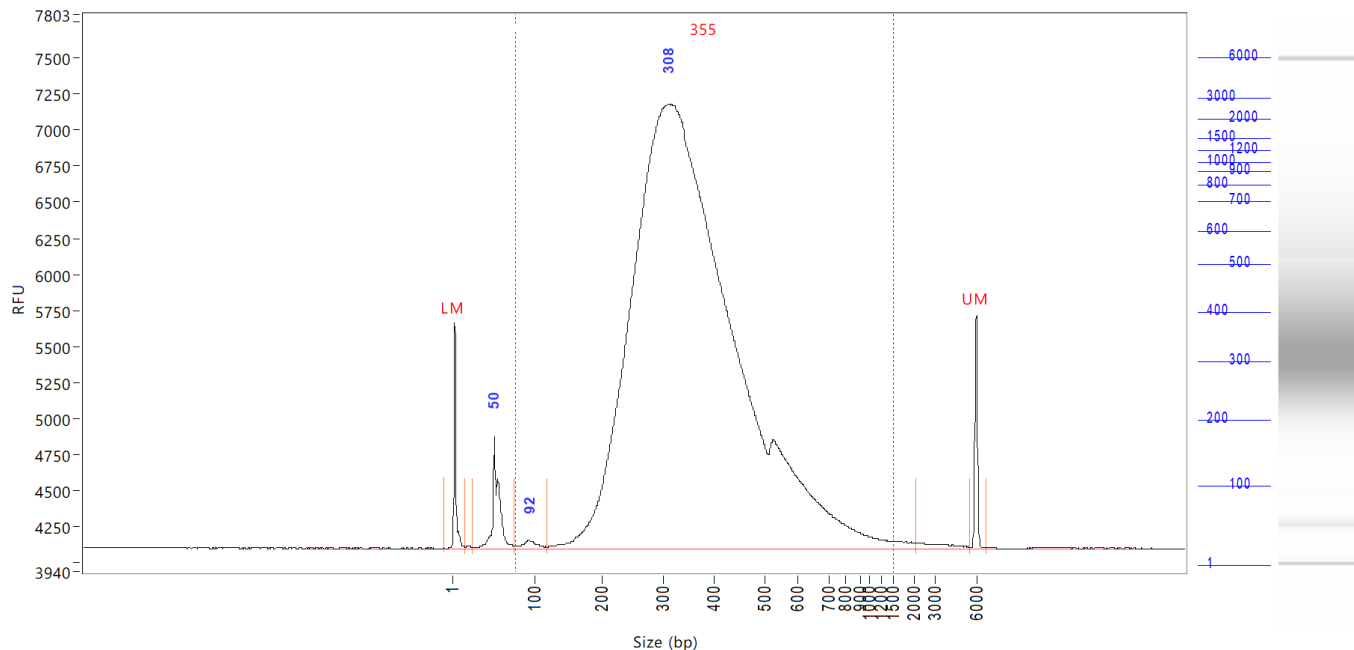

| Peak | Size (bp) | Conc. (ng/uL) | From (bp) | To (bp) | RFU  |
|------|-----------|---------------|-----------|---------|------|
| 1    | 1 (LM)    | 0.0124        | 0         | 15      | 1566 |
| 2    | 50        | 0.2050        | 24        | 75      | 774  |
| 3    | 92        | 0.0324        | 75        | 117     | 55   |
| 4    | 308       | 9.3691        | 117       | 2084    | 3086 |
| 5    | 6000 (UM) | 0.0078        | 5517      | 6783    | 1618 |

TIC: 9.6066 ng/uL  
 TIM: 50.0865 nmole/L  
 Total Conc.: 9.6361 ng/uL

Smear Analysis      75 bp to 1500 bp      9.3826 ng/uL      97.4 %Total      43.5352 nmole/L      355 Avg. Size (b.p.)      34.34 %CV

Sample Peak Width (sec): 50      Sample Min Peak Height: 25      Sample Baseline V to V?: Y      Sample Baseline V to V pts: 3  
 Sample Filter: Binomial      # of Pts for Filter: 3      Sample Start Region (min): 0      Sample End Region (min): 50  
 Manual Baseline Start (min): 10      Manual Baseline End (min): 48  
 Marker Peak Width (sec): 5      Marker Min Peak Height: 200      Marker Baseline V to V?: Y      Marker Baseline V to V pts: 3  
 Lower Marker Selection: First Peak > 200 RFU      Upper Marker Selection: Last Peak > 200 RFU  
 Ladder Size (bp): 1, 100, 200, 300, 400, 500, 600, 700, 800, 900, 1000, 1200, 1500, 2000, 3000, 6000  
 Quantification Using: Ladder      Final Concentration (ng/uL): 0.0830      Dilution Factor: 12.0



Sample: 103613-001-084

Well Location: D11

Created: Friday, June 21, 2019 2:11:36 PM

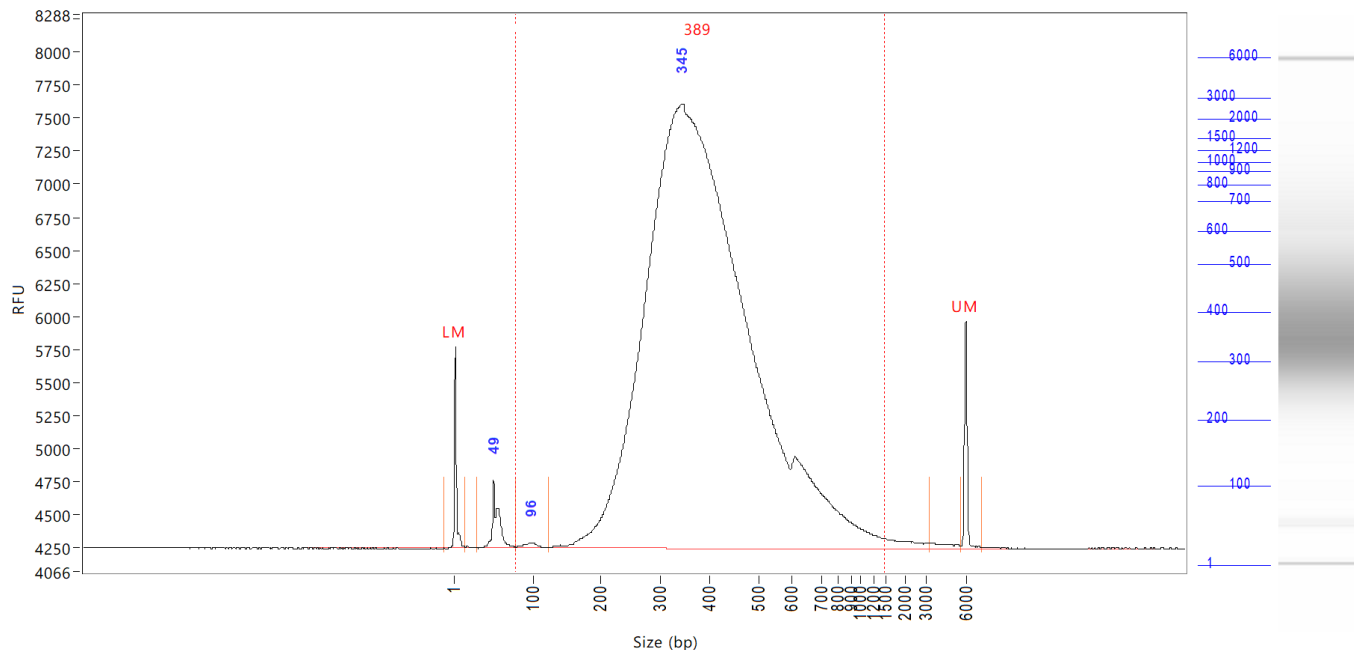

| Peak | Size (bp) | Conc. (ng/uL) | From (bp) | To (bp) | RFU  |
|------|-----------|---------------|-----------|---------|------|
| 1    | 1 (LM)    | 0.0124        | 0         | 15      | 1523 |
| 2    | 49        | 0.1410        | 30        | 76      | 513  |
| 3    | 96        | 0.0249        | 76        | 122     | 39   |
| 4    | 345       | 10.3934       | 122       | 3255    | 3370 |
| 5    | 6000 (UM) | 0.0084        | 5593      | 7111    | 1725 |

TIC: 10.5594 ng/uL  
 TIM: 47.8682 nmole/L  
 Total Conc.: 10.5799 ng/uL

Smear Analysis      75 bp to 1500 bp      10.3761 ng/uL      98.1 %Total      43.8325 nmole/L      389 Avg. Size (b.p.)      33.25 %CV

Sample Peak Width (sec): 50      Sample Min Peak Height: 25      Sample Baseline V to V?: Y      Sample Baseline V to V pts: 3  
 Sample Filter: Binomial      # of Pts for Filter: 3      Sample Start Region (min): 0      Sample End Region (min): 50  
 Manual Baseline Start (min): 10      Manual Baseline End (min): 48  
 Marker Peak Width (sec): 5      Marker Min Peak Height: 200      Marker Baseline V to V?: Y      Marker Baseline V to V pts: 3  
 Lower Marker Selection: First Peak > 200 RFU      Upper Marker Selection: Last Peak > 200 RFU  
 Ladder Size (bp): 1, 100, 200, 300, 400, 500, 600, 700, 800, 900, 1000, 1200, 1500, 2000, 3000, 6000  
 Quantification Using: Ladder      Final Concentration (ng/uL): 0.0830      Dilution Factor: 12.0

**Sample:** 103613-001-085

**Well Location:** E11

**Created:** Friday, June 21, 2019 2:11:36 PM

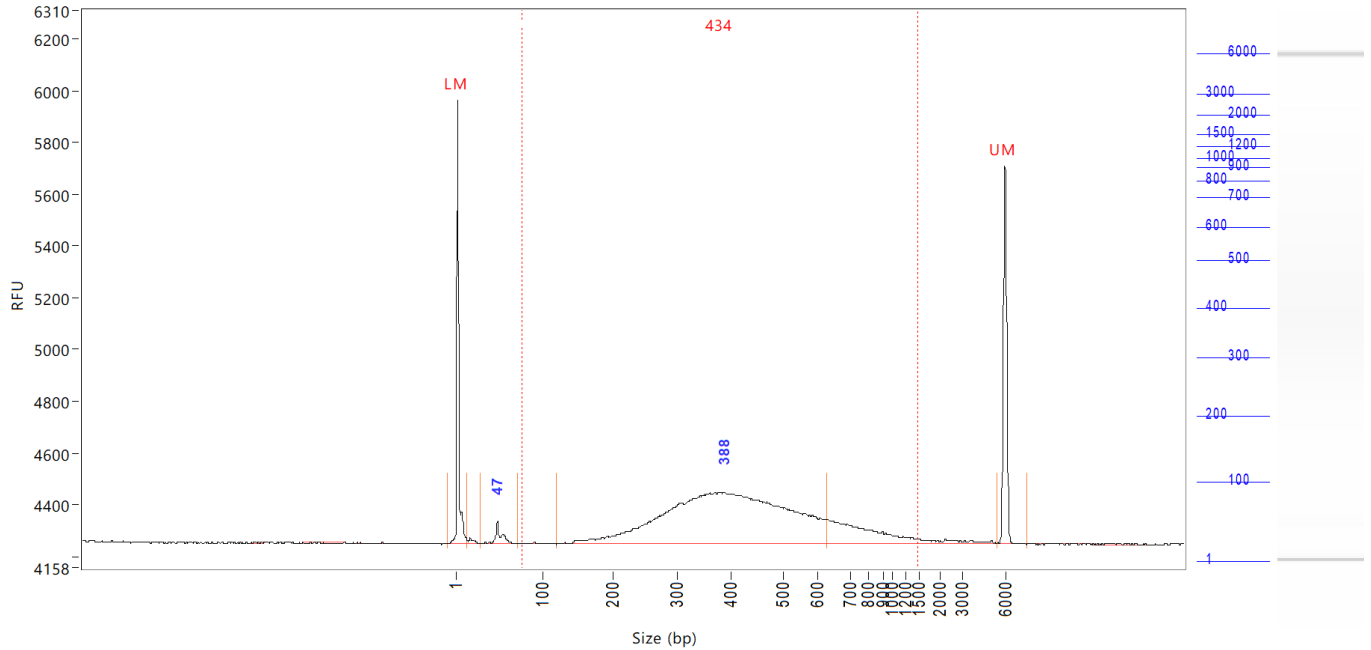

| Peak | Size (bp) | Conc. (ng/uL) | From (bp) | To (bp) | RFU  |
|------|-----------|---------------|-----------|---------|------|
| 1    | 1 (LM)    | 0.0124        | 0         | 14      | 1713 |
| 2    | 47        | 0.0165        | 28        | 72      | 84   |
| 3    | 388       | 0.6644        | 121       | 630     | 197  |
| 4    | 6000 (UM) | 0.0076        | 5441      | 7465    | 1457 |

TIC: 0.6809 ng/uL  
 TIM: 3.3774 nmole/L  
 Total Conc.: 0.7837 ng/uL

Smear Analysis      75 bp to 1500 bp      0.7500 ng/uL      95.7 %Total      2.8417 nmole/L      434 Avg. Size (b.p.)      40.70 %CV

Sample Peak Width (sec): 50    Sample Min Peak Height: 25    Sample Baseline V to V?: Y    Sample Baseline V to V pts: 3  
 Sample Filter: Binomial    # of Pts for Filter: 3    Sample Start Region (min): 0    Sample End Region (min): 50  
 Manual Baseline Start (min): 10    Manual Baseline End (min): 48  
 Marker Peak Width (sec): 5    Marker Min Peak Height: 200    Marker Baseline V to V?: Y    Marker Baseline V to V pts: 3  
 Lower Marker Selection: First Peak > 200 RFU    Upper Marker Selection: Last Peak > 200 RFU  
 Ladder Size (bp): 1, 100, 200, 300, 400, 500, 600, 700, 800, 900, 1000, 1200, 1500, 2000, 3000, 6000  
 Quantification Using: Ladder    Final Concentration (ng/uL): 0.0830    Dilution Factor: 12.0

**Sample:** 103613-001-086

**Well Location:** F11

**Created:** Friday, June 21, 2019 2:11:36 PM

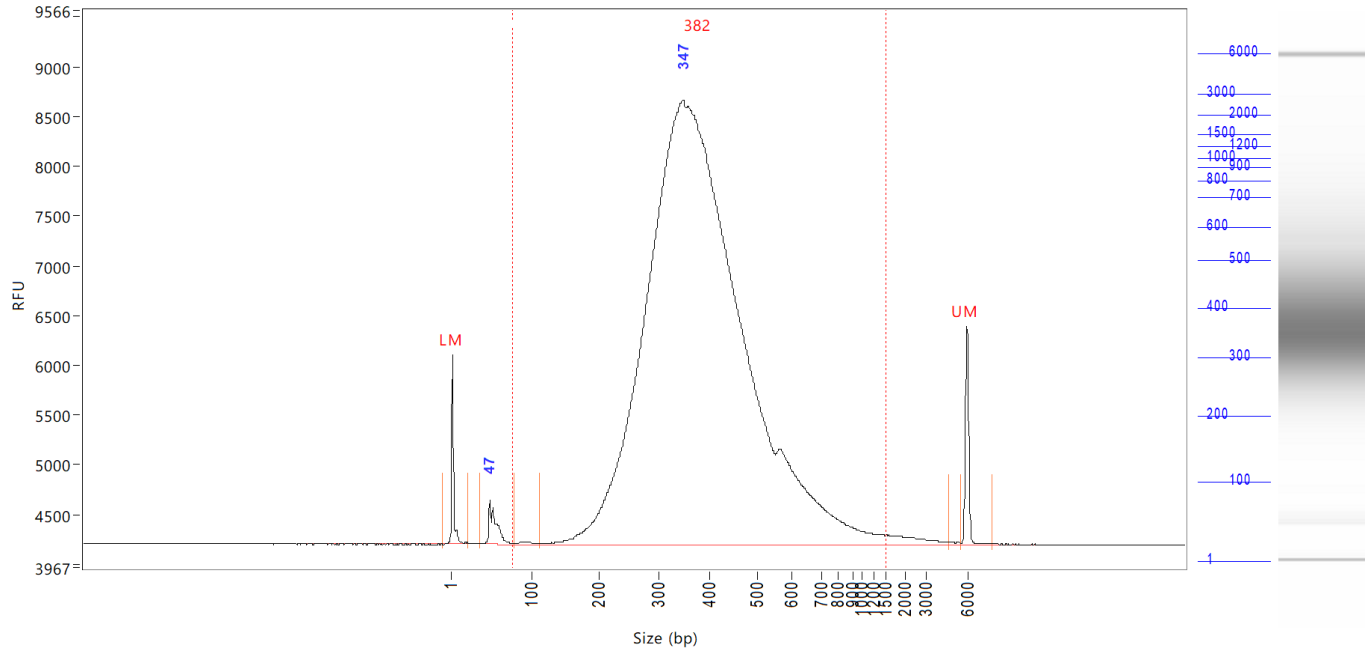

| Peak | Size (bp) | Conc. (ng/uL) | From (bp) | To (bp) | RFU  |
|------|-----------|---------------|-----------|---------|------|
| 1    | 1 (LM)    | 0.0124        | 0         | 21      | 1910 |
| 2    | 47        | 0.1105        | 35        | 78      | 445  |
| 3    | 347       | 10.0243       | 112       | 4628    | 4472 |
| 4    | 6000 (UM) | 0.0101        | 5543      | 7794    | 2198 |

TIC: 10.1348 ng/uL  
 TIM: 45.2761 nmole/L  
 Total Conc.: 10.1514 ng/uL

Smear Analysis      75 bp to 1500 bp      9.9780 ng/uL      98.3 %Total      42.9242 nmole/L      382 Avg. Size (b.p.)      31.68 %CV

Sample Peak Width (sec): 50      Sample Min Peak Height: 25      Sample Baseline V to V?: Y      Sample Baseline V to V pts: 3  
 Sample Filter: Binomial      # of Pts for Filter: 3      Sample Start Region (min): 0      Sample End Region (min): 50  
 Manual Baseline Start (min): 10      Manual Baseline End (min): 48  
 Marker Peak Width (sec): 5      Marker Min Peak Height: 200      Marker Baseline V to V?: Y      Marker Baseline V to V pts: 3  
 Lower Marker Selection: First Peak > 200 RFU      Upper Marker Selection: Last Peak > 200 RFU  
 Ladder Size (bp): 1, 100, 200, 300, 400, 500, 600, 700, 800, 900, 1000, 1200, 1500, 2000, 3000, 6000  
 Quantification Using: Ladder      Final Concentration (ng/uL): 0.0830      Dilution Factor: 12.0

Sample: 103613-001-087

Well Location: G11

Created: Friday, June 21, 2019 2:11:36 PM

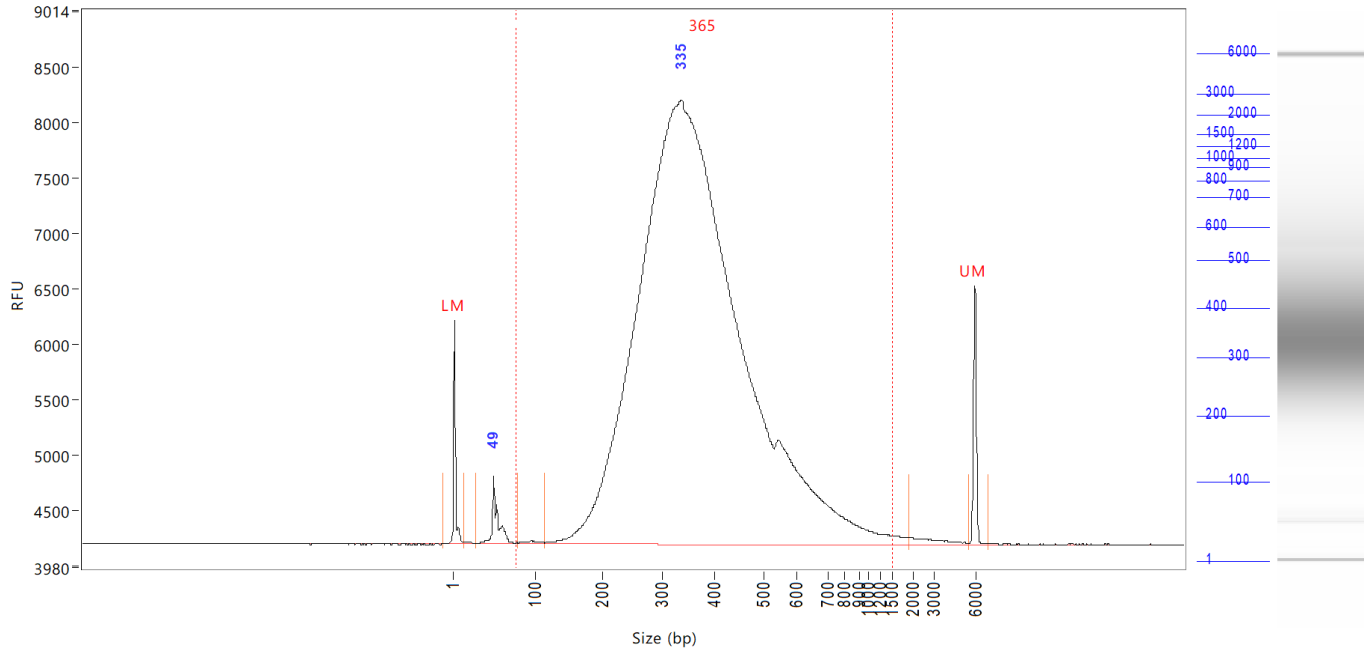

| Peak | Size (bp) | Conc. (ng/uL) | From (bp) | To (bp) | RFU  |
|------|-----------|---------------|-----------|---------|------|
| 1    | 1 (LM)    | 0.0124        | 0         | 15      | 2027 |
| 2    | 49        | 0.1130        | 28        | 78      | 615  |
| 3    | 335       | 9.3054        | 114       | 1911    | 4019 |
| 4    | 6000 (UM) | 0.0097        | 5517      | 7010    | 2335 |

TIC: 9.4184 ng/uL  
 TIM: 45.0938 nmole/L  
 Total Conc.: 9.4671 ng/uL

Smear Analysis      75 bp to 1500 bp      9.3034 ng/uL      98.3 %Total      41.9077 nmole/L      365 Avg. Size (b.p.)      34.06 %CV

Sample Peak Width (sec): 50      Sample Min Peak Height: 25      Sample Baseline V to V?: Y      Sample Baseline V to V pts: 3  
 Sample Filter: Binomial      # of Pts for Filter: 3      Sample Start Region (min): 0      Sample End Region (min): 50  
 Manual Baseline Start (min): 10      Manual Baseline End (min): 48  
 Marker Peak Width (sec): 5      Marker Min Peak Height: 200      Marker Baseline V to V?: Y      Marker Baseline V to V pts: 3  
 Lower Marker Selection: First Peak > 200 RFU      Upper Marker Selection: Last Peak > 200 RFU  
 Ladder Size (bp): 1, 100, 200, 300, 400, 500, 600, 700, 800, 900, 1000, 1200, 1500, 2000, 3000, 6000  
 Quantification Using: Ladder      Final Concentration (ng/uL): 0.0830      Dilution Factor: 12.0

**Sample:** 103613-001-088

**Well Location:** H11

**Created:** Friday, June 21, 2019 2:11:36 PM

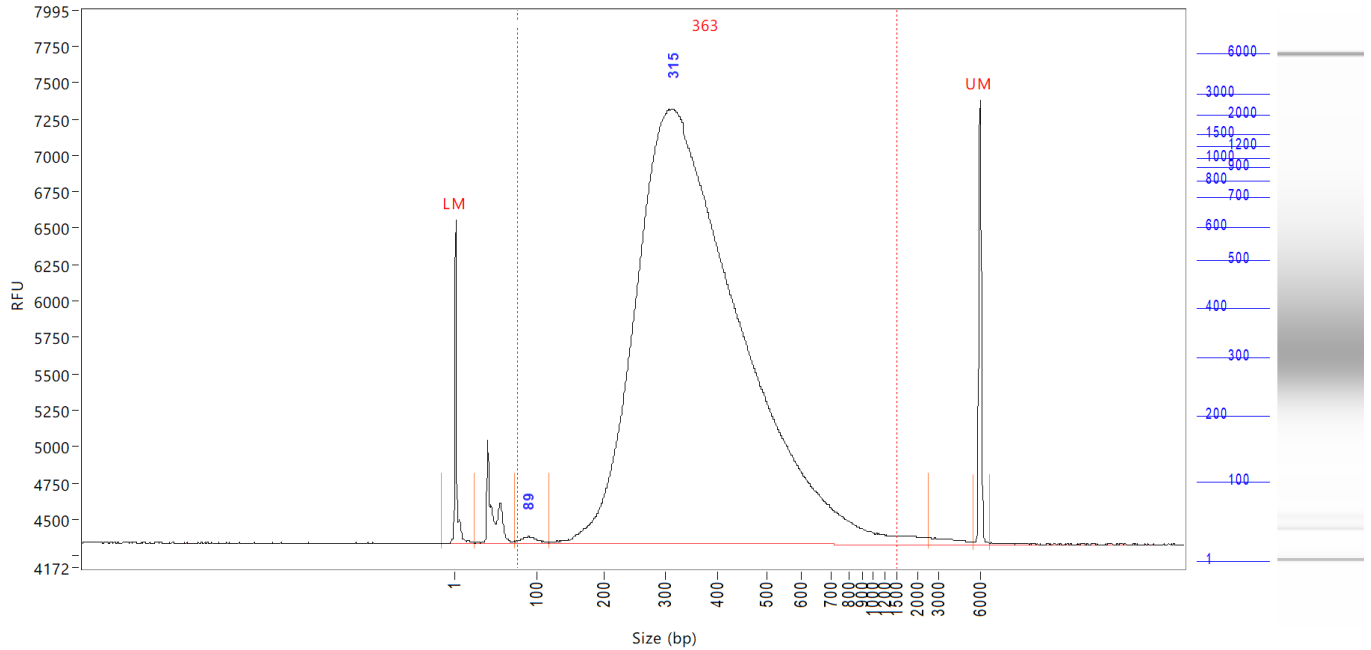

| Peak | Size (bp) | Conc. (ng/uL) | From (bp) | To (bp) | RFU  |
|------|-----------|---------------|-----------|---------|------|
| 1    | 1 (LM)    | 0.0124        | 0         | 26      | 2220 |
| 2    | 89        | 0.0225        | 73        | 118     | 48   |
| 3    | 315       | 6.3337        | 118       | 2567    | 2984 |
| 4    | 6000 (UM) | 0.0097        | 5517      | 6707    | 3054 |

TIC: 6.3561 ng/uL  
 TIM: 28.6441 nmole/L  
 Total Conc.: 6.5036 ng/uL

Smear Analysis      75 bp to 1500 bp      6.3328 ng/uL      97.4 %Total      28.7321 nmole/L      363 Avg. Size (b.p.)      33.82 %CV

Sample Peak Width (sec): 50      Sample Min Peak Height: 25      Sample Baseline V to V?: Y      Sample Baseline V to V pts: 3  
 Sample Filter: Binomial      # of Pts for Filter: 3      Sample Start Region (min): 0      Sample End Region (min): 50  
 Manual Baseline Start (min): 10      Manual Baseline End (min): 48  
 Marker Peak Width (sec): 5      Marker Min Peak Height: 200      Marker Baseline V to V?: Y      Marker Baseline V to V pts: 3  
 Lower Marker Selection: First Peak > 200 RFU      Upper Marker Selection: Last Peak > 200 RFU  
 Ladder Size (bp): 1, 100, 200, 300, 400, 500, 600, 700, 800, 900, 1000, 1200, 1500, 2000, 3000, 6000  
 Quantification Using: Ladder      Final Concentration (ng/uL): 0.0830      Dilution Factor: 12.0

Sample: 103613-001-089

Well Location: A12

Created: Friday, June 21, 2019 2:11:36 PM

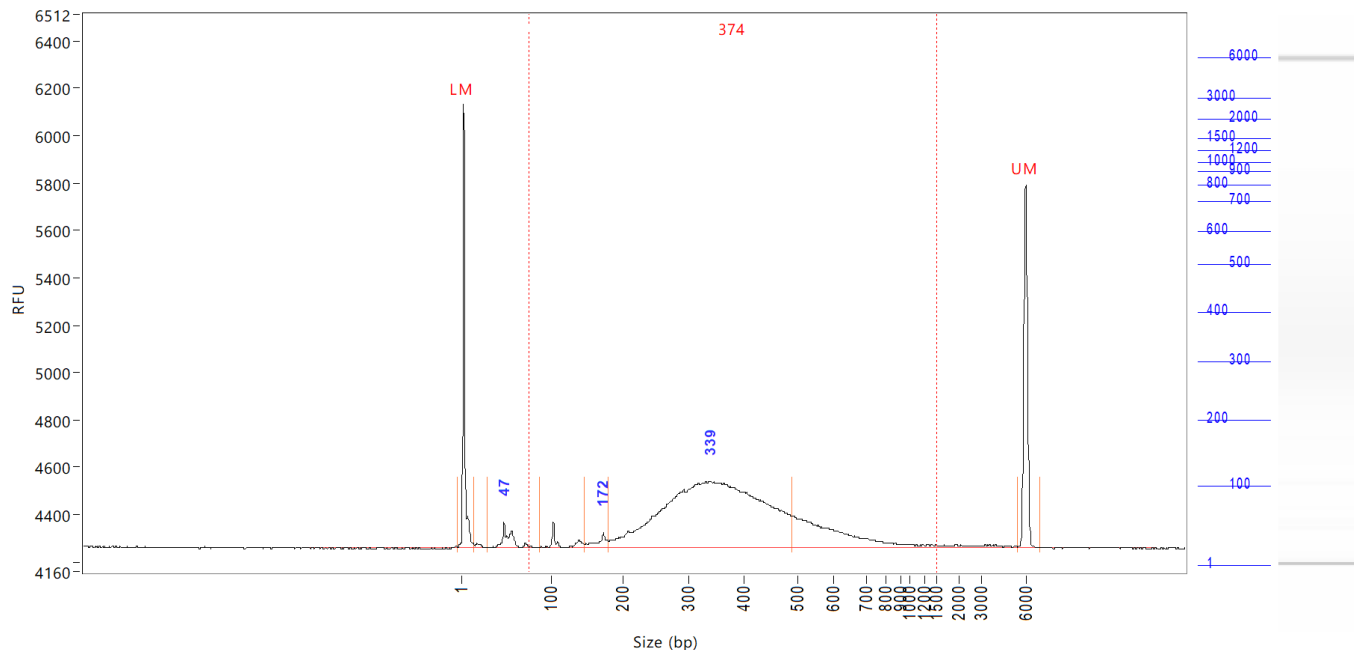

| Peak | Size (bp) | Conc. (ng/uL) | From (bp) | To (bp) | RFU  |
|------|-----------|---------------|-----------|---------|------|
| 1    | 1 (LM)    | 0.0124        | 0         | 14      | 1875 |
| 2    | 47        | 0.0309        | 28        | 87      | 107  |
| 3    | 172       | 0.0173        | 145       | 179     | 66   |
| 4    | 339       | 0.7201        | 179       | 489     | 279  |
| 5    | 6000 (UM) | 0.0078        | 5441      | 6909    | 1532 |

TIC: 0.7683 ng/uL  
 TIM: 4.6109 nmole/L  
 Total Conc.: 0.9348 ng/uL

Smear Analysis      75 bp to 1500 bp      0.8894 ng/uL      95.1 %Total      3.9164 nmole/L      374 Avg. Size (b.p.)      38.49 %CV

Sample Peak Width (sec): 50      Sample Min Peak Height: 25      Sample Baseline V to V?: Y      Sample Baseline V to V pts: 3  
 Sample Filter: Binomial      # of Pts for Filter: 3      Sample Start Region (min): 0      Sample End Region (min): 50  
 Manual Baseline Start (min): 10      Manual Baseline End (min): 48  
 Marker Peak Width (sec): 5      Marker Min Peak Height: 200      Marker Baseline V to V?: Y      Marker Baseline V to V pts: 3  
 Lower Marker Selection: First Peak > 200 RFU      Upper Marker Selection: Last Peak > 200 RFU  
 Ladder Size (bp): 1, 100, 200, 300, 400, 500, 600, 700, 800, 900, 1000, 1200, 1500, 2000, 3000, 6000  
 Quantification Using: Ladder      Final Concentration (ng/uL): 0.0830      Dilution Factor: 12.0

**Sample:** 103613-001-090

**Well Location:** B12

**Created:** Friday, June 21, 2019 2:11:36 PM

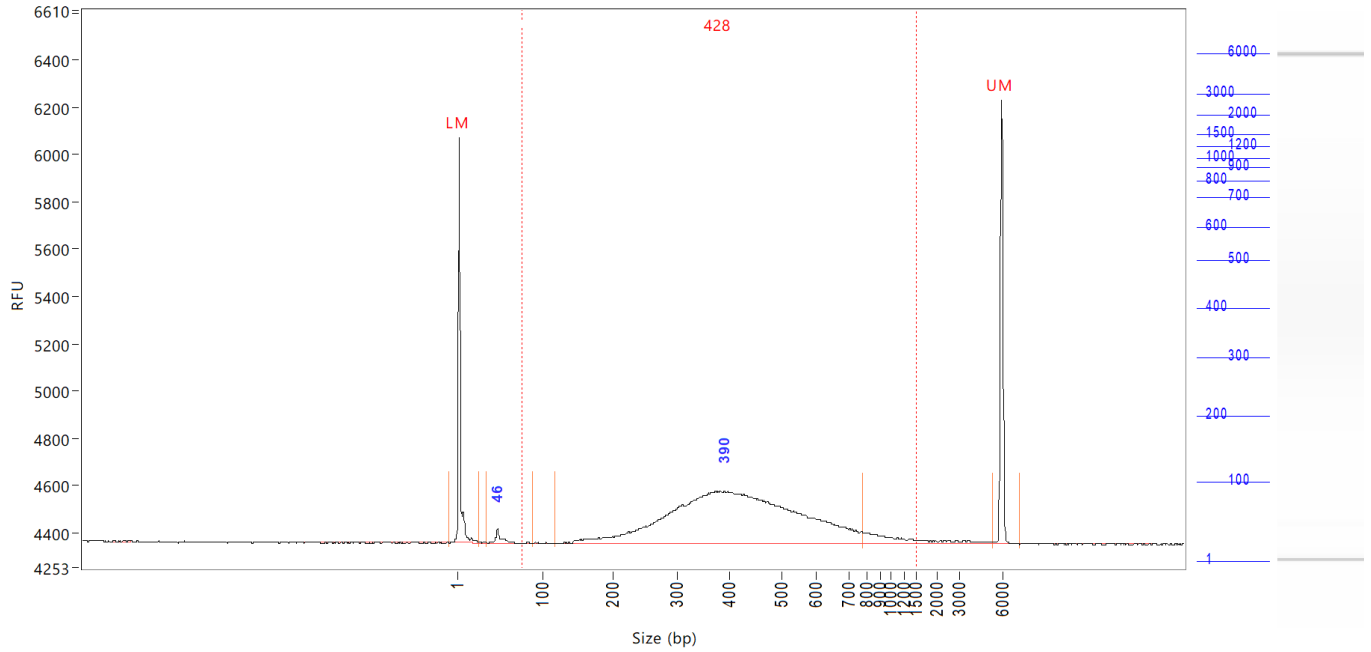

| Peak | Size (bp) | Conc. (ng/uL) | From (bp) | To (bp) | RFU  |
|------|-----------|---------------|-----------|---------|------|
| 1    | 1 (LM)    | 0.0124        | 0         | 25      | 1712 |
| 2    | 46        | 0.0118        | 35        | 88      | 62   |
| 3    | 390       | 0.7247        | 118       | 784     | 221  |
| 4    | 6000 (UM) | 0.0077        | 5415      | 7288    | 1879 |

TIC: 0.7366 ng/uL  
 TIM: 3.3034 nmole/L  
 Total Conc.: 0.7742 ng/uL

Smear Analysis      75 bp to 1500 bp      0.7505 ng/uL      96.9 %Total      2.8830 nmole/L      428 Avg. Size (b.p.)      37.92 %CV

Sample Peak Width (sec): 50      Sample Min Peak Height: 25      Sample Baseline V to V?: Y      Sample Baseline V to V pts: 3  
 Sample Filter: Binomial      # of Pts for Filter: 3      Sample Start Region (min): 0      Sample End Region (min): 50  
 Manual Baseline Start (min): 10      Manual Baseline End (min): 48  
 Marker Peak Width (sec): 5      Marker Min Peak Height: 200      Marker Baseline V to V?: Y      Marker Baseline V to V pts: 3  
 Lower Marker Selection: First Peak > 200 RFU      Upper Marker Selection: Last Peak > 200 RFU  
 Ladder Size (bp): 1, 100, 200, 300, 400, 500, 600, 700, 800, 900, 1000, 1200, 1500, 2000, 3000, 6000  
 Quantification Using: Ladder      Final Concentration (ng/uL): 0.0830      Dilution Factor: 12.0

Sample: 103613-001-091

Well Location: C12

Created: Friday, June 21, 2019 2:11:36 PM

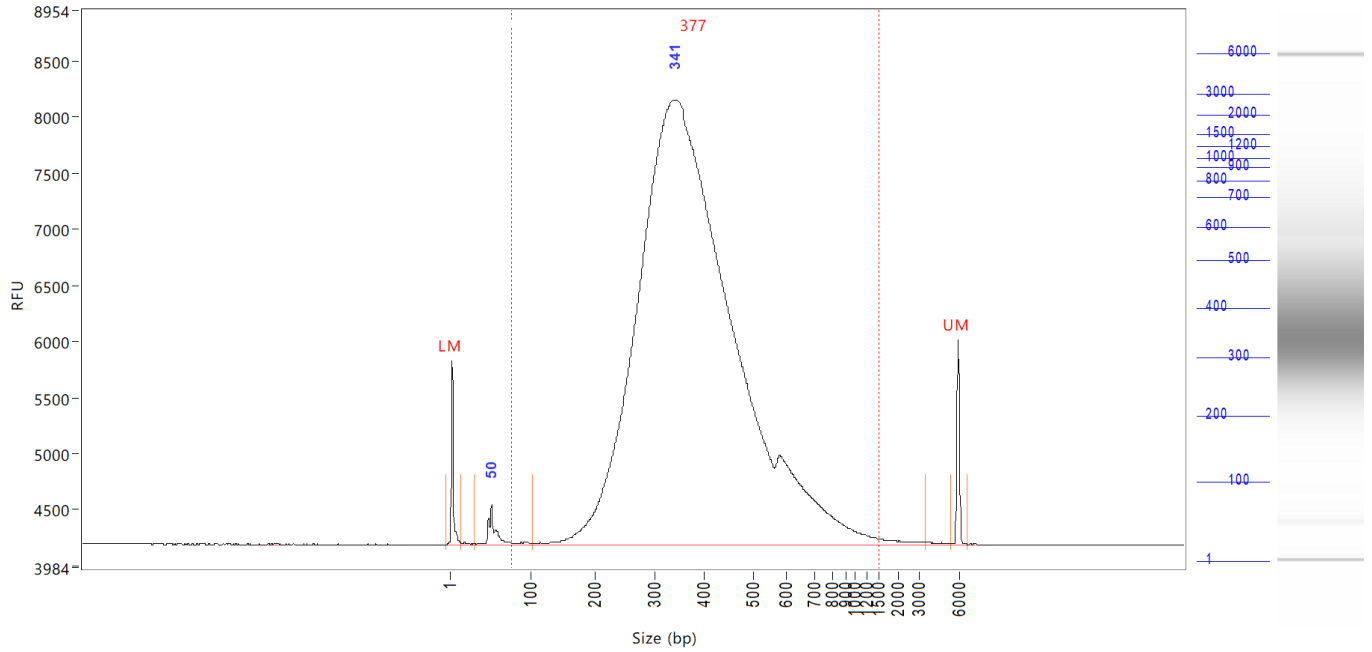

| Peak | Size (bp) | Conc. (ng/uL) | From (bp) | To (bp) | RFU  |
|------|-----------|---------------|-----------|---------|------|
| 1    | 1 (LM)    | 0.0124        | 0         | 14      | 1646 |
| 2    | 50        | 0.1003        | 31        | 104     | 354  |
| 3    | 341       | 10.8618       | 104       | 3560    | 3971 |
| 4    | 6000 (UM) | 0.0080        | 5415      | 6707    | 1833 |

TIC: 10.9622 ng/uL  
 TIM: 49.7887 nmole/L  
 Total Conc.: 10.9733 ng/uL

Smear Analysis      75 bp to 1500 bp      10.8462 ng/uL      98.8 %Total      47.3841 nmole/L      377 Avg. Size (b.p.)      32.41 %CV

Sample Peak Width (sec): 50      Sample Min Peak Height: 25      Sample Baseline V to V?: Y      Sample Baseline V to V pts: 3  
 Sample Filter: Binomial      # of Pts for Filter: 3      Sample Start Region (min): 0      Sample End Region (min): 50  
 Manual Baseline Start (min): 10      Manual Baseline End (min): 48  
 Marker Peak Width (sec): 5      Marker Min Peak Height: 200      Marker Baseline V to V?: Y      Marker Baseline V to V pts: 3  
 Lower Marker Selection: First Peak > 200 RFU      Upper Marker Selection: Last Peak > 200 RFU  
 Ladder Size (bp): 1, 100, 200, 300, 400, 500, 600, 700, 800, 900, 1000, 1200, 1500, 2000, 3000, 6000  
 Quantification Using: Ladder      Final Concentration (ng/uL): 0.0830      Dilution Factor: 12.0



Sample: 103613-001-092

Well Location: D12

Created: Friday, June 21, 2019 2:11:36 PM

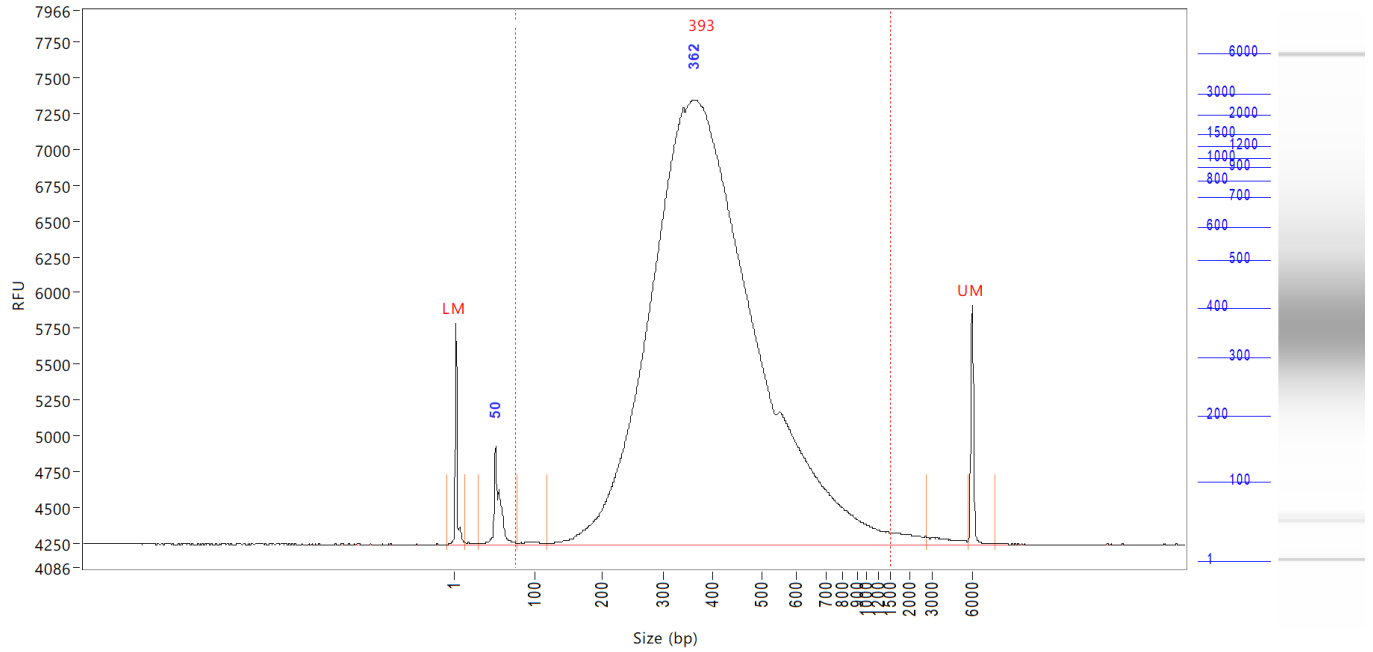

| Peak | Size (bp) | Conc. (ng/uL) | From (bp) | To (bp) | RFU  |
|------|-----------|---------------|-----------|---------|------|
| 1    | 1 (LM)    | 0.0124        | 0         | 15      | 1542 |
| 2    | 50        | 0.1677        | 30        | 78      | 688  |
| 3    | 362       | 9.4379        | 118       | 2784    | 3101 |
| 4    | 6000 (UM) | 0.0084        | 5670      | 7692    | 1668 |

TIC: 9.6056 ng/uL  
 TIM: 43.9066 nmole/L  
 Total Conc.: 9.6544 ng/uL

Smear Analysis 75 bp to 1500 bp 9.4058 ng/uL 97.4 %Total 39.3889 nmole/L 393 Avg. Size (b.p.) 33.61 %CV

Sample Peak Width (sec): 50 Sample Min Peak Height: 25 Sample Baseline V to V?: Y Sample Baseline V to V pts: 3  
 Sample Filter: Binomial # of Pts for Filter: 3 Sample Start Region (min): 0 Sample End Region (min): 50  
 Manual Baseline Start (min): 10 Manual Baseline End (min): 48  
 Marker Peak Width (sec): 5 Marker Min Peak Height: 200 Marker Baseline V to V?: Y Marker Baseline V to V pts: 3  
 Lower Marker Selection: First Peak > 200 RFU Upper Marker Selection: Last Peak > 200 RFU  
 Ladder Size (bp): 1, 100, 200, 300, 400, 500, 600, 700, 800, 900, 1000, 1200, 1500, 2000, 3000, 6000  
 Quantification Using: Ladder Final Concentration (ng/uL): 0.0830 Dilution Factor: 12.0

Sample: 103613-001-093

Well Location: E12

Created: Friday, June 21, 2019 2:11:36 PM

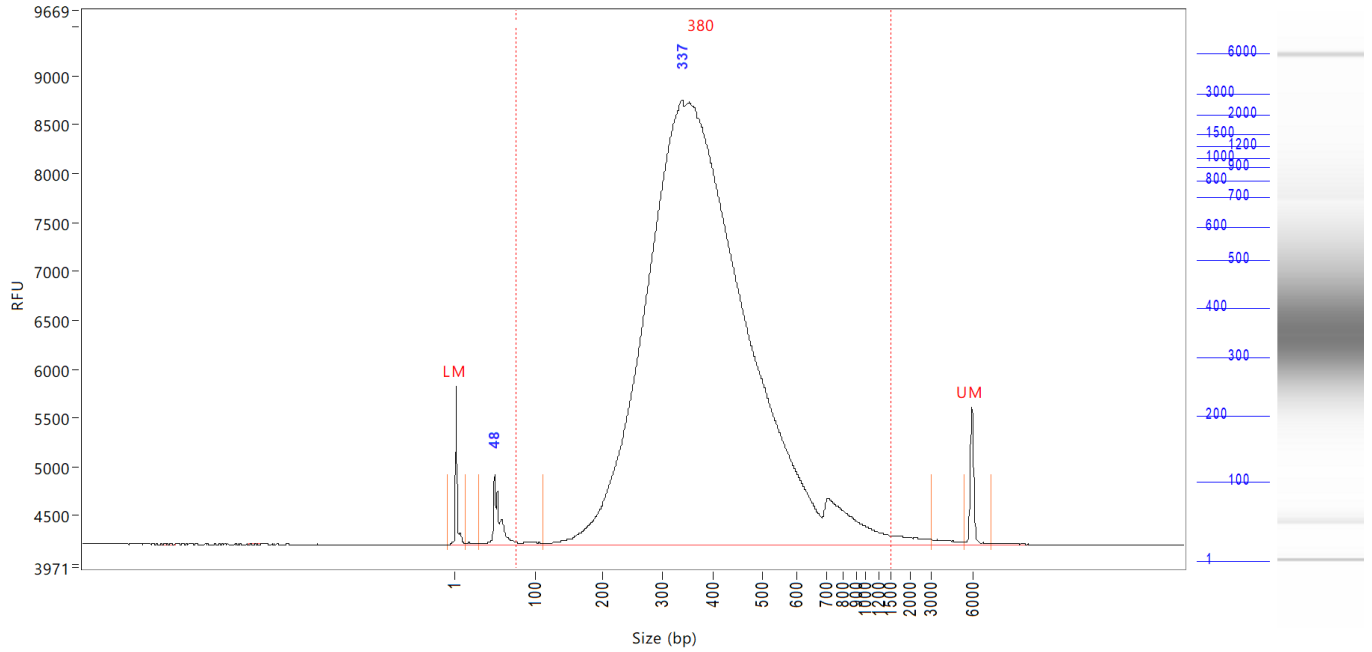

| Peak | Size (bp) | Conc. (ng/uL) | From (bp) | To (bp) | RFU  |
|------|-----------|---------------|-----------|---------|------|
| 1    | 1 (LM)    | 0.0124        | 0         | 15      | 1613 |
| 2    | 48        | 0.2009        | 30        | 111     | 711  |
| 3    | 337       | 13.2972       | 111       | 3001    | 4553 |
| 4    | 6000 (UM) | 0.0086        | 5492      | 7364    | 1406 |

TIC: 13.4980 ng/uL  
 TIM: 62.4081 nmole/L  
 Total Conc.: 13.5274 ng/uL

Smear Analysis      75 bp to 1500 bp      13.2585 ng/ul      98.0 %Total      57.4537 nmole/L      380 Avg. Size (b.p.)      33.26 %CV

Sample Peak Width (sec): 50      Sample Min Peak Height: 25      Sample Baseline V to V?: Y      Sample Baseline V to V pts: 3  
 Sample Filter: Binomial      # of Pts for Filter: 3      Sample Start Region (min): 0      Sample End Region (min): 50  
 Manual Baseline Start (min): 10      Manual Baseline End (min): 48  
 Marker Peak Width (sec): 5      Marker Min Peak Height: 200      Marker Baseline V to V?: Y      Marker Baseline V to V pts: 3  
 Lower Marker Selection: First Peak > 200 RFU      Upper Marker Selection: Last Peak > 200 RFU  
 Ladder Size (bp): 1, 100, 200, 300, 400, 500, 600, 700, 800, 900, 1000, 1200, 1500, 2000, 3000, 6000  
 Quantification Using: Ladder      Final Concentration (ng/uL): 0.0830      Dilution Factor: 12.0

**Sample:** 103613-001-094

**Well Location:** F12

**Created:** Friday, June 21, 2019 2:11:36 PM

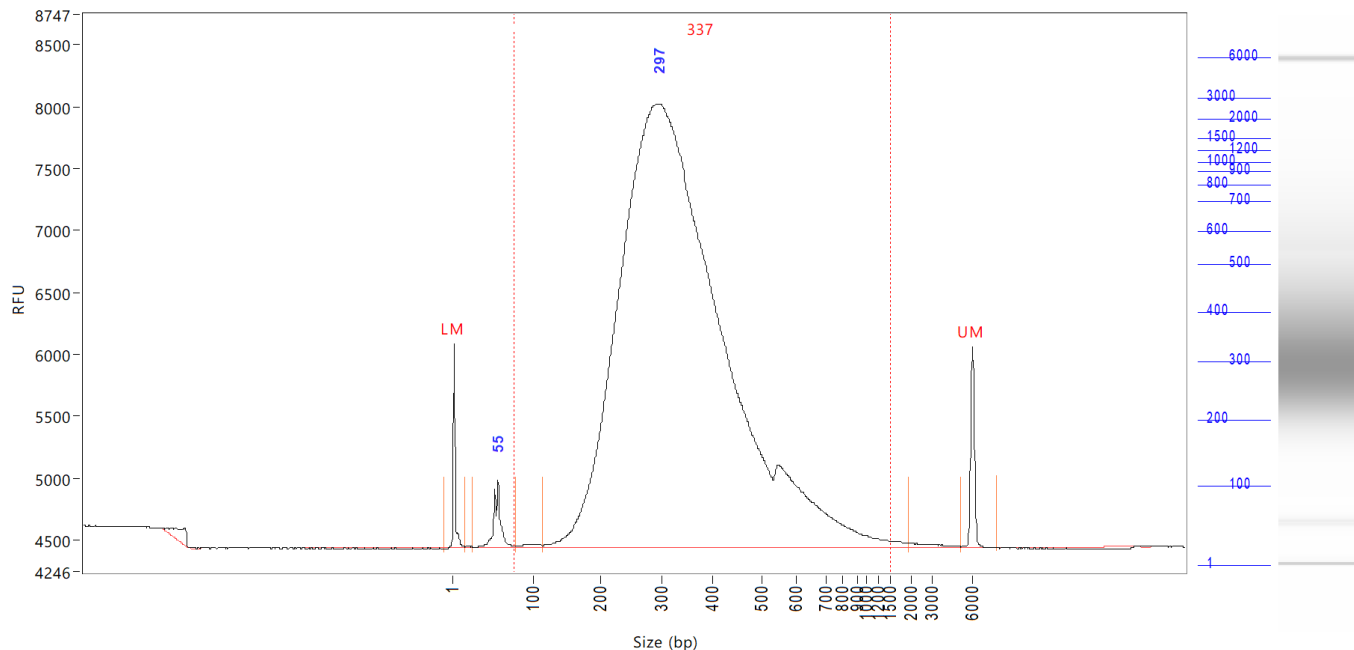

| Peak | Size (bp) | Conc. (ng/uL) | From (bp) | To (bp) | RFU  |
|------|-----------|---------------|-----------|---------|------|
| 1    | 1 (LM)    | 0.0124        | 0         | 15      | 1651 |
| 2    | 55        | 0.1457        | 25        | 78      | 551  |
| 3    | 297       | 10.6549       | 112       | 1973    | 3587 |
| 4    | 6000 (UM) | 0.0098        | 5161      | 7794    | 1611 |

TIC: 10.8006 ng/uL  
 TIM: 56.1272 nmole/L  
 Total Conc.: 10.8363 ng/uL

Smear Analysis      75 bp to 1500 bp      10.6605 ng/ul      98.4 %Total      52.0620 nmole/L      337 Avg. Size (b.p.)      35.96 %CV

Sample Peak Width (sec): 50      Sample Min Peak Height: 25      Sample Baseline V to V?: Y      Sample Baseline V to V pts: 3  
 Sample Filter: Binomial      # of Pts for Filter: 3      Sample Start Region (min): 0      Sample End Region (min): 50  
 Manual Baseline Start (min): 10      Manual Baseline End (min): 48  
 Marker Peak Width (sec): 5      Marker Min Peak Height: 200      Marker Baseline V to V?: Y      Marker Baseline V to V pts: 3  
 Lower Marker Selection: First Peak > 200 RFU      Upper Marker Selection: Last Peak > 200 RFU  
 Ladder Size (bp): 1, 100, 200, 300, 400, 500, 600, 700, 800, 900, 1000, 1200, 1500, 2000, 3000, 6000  
 Quantification Using: Ladder      Final Concentration (ng/uL): 0.0830      Dilution Factor: 12.0

**Sample:** 103613-001-095

**Well Location:** G12

**Created:** Friday, June 21, 2019 2:11:36 PM

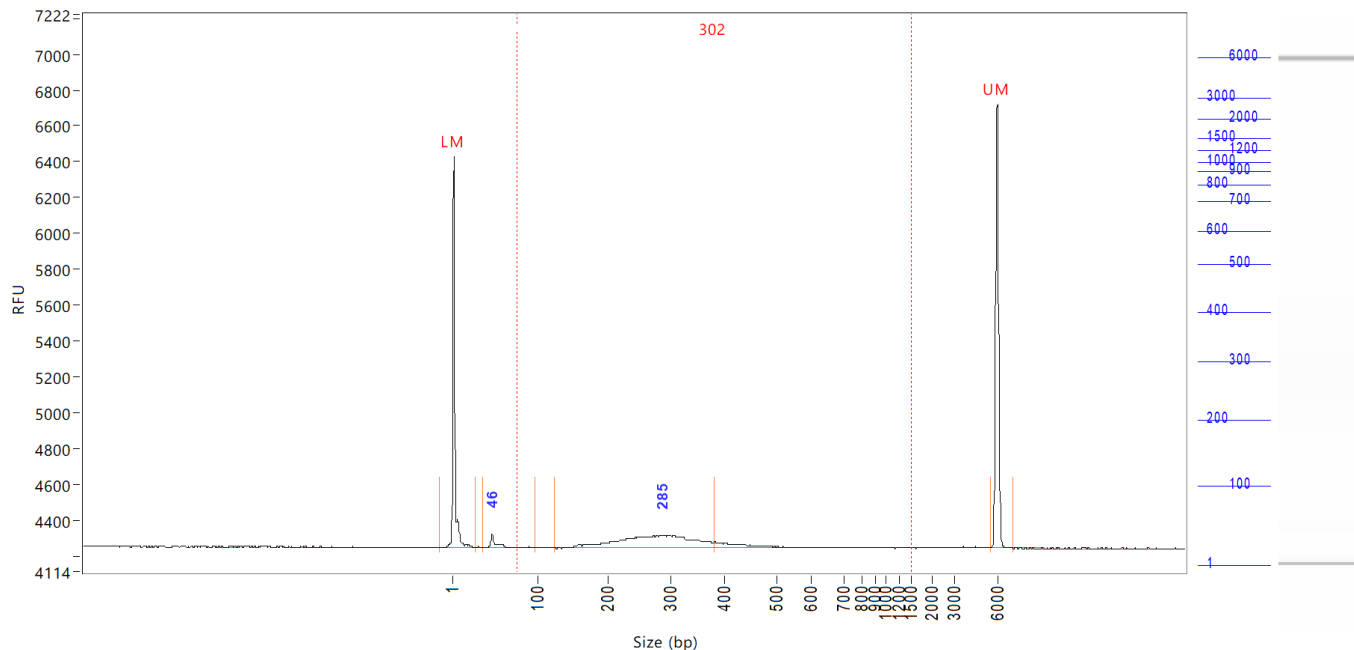

| Peak         | Size (bp) | Conc. (ng/uL) | From (bp) | To (bp) | RFU  |
|--------------|-----------|---------------|-----------|---------|------|
| 1            | 1 (LM)    | 0.0124        | 0         | 28      | 2182 |
| 2            | 46        | 0.0104        | 36        | 97      | 72   |
| 3            | 285       | 0.1140        | 125       | 380     | 67   |
| 4            | 6000 (UM) | 0.0094        | 5568      | 7111    | 2481 |
| TIC:         |           | 0.1244        | ng/uL     |         |      |
| TIM:         |           | 1.0341        | nmole/L   |         |      |
| Total Conc.: |           | 0.1492        | ng/uL     |         |      |

Smear Analysis      75 bp to 1500 bp      0.1347 ng/uL      90.3 %Total      0.7342 nmole/L      302 Avg. Size (b.p.)      36.98 %CV

Sample Peak Width (sec): 50      Sample Min Peak Height: 25      Sample Baseline V to V?: Y      Sample Baseline V to V pts: 3  
 Sample Filter: Binomial      # of Pts for Filter: 3      Sample Start Region (min): 0      Sample End Region (min): 50  
 Manual Baseline Start (min): 10      Manual Baseline End (min): 48  
 Marker Peak Width (sec): 5      Marker Min Peak Height: 200      Marker Baseline V to V?: Y      Marker Baseline V to V pts: 3  
 Lower Marker Selection: First Peak > 200 RFU      Upper Marker Selection: Last Peak > 200 RFU  
 Ladder Size (bp): 1, 100, 200, 300, 400, 500, 600, 700, 800, 900, 1000, 1200, 1500, 2000, 3000, 6000  
 Quantification Using: Ladder      Final Concentration (ng/uL): 0.0830      Dilution Factor: 12.0

Sample: 103613-001-096

Well Location: H12

Created: Friday, June 21, 2019 2:11:36 PM

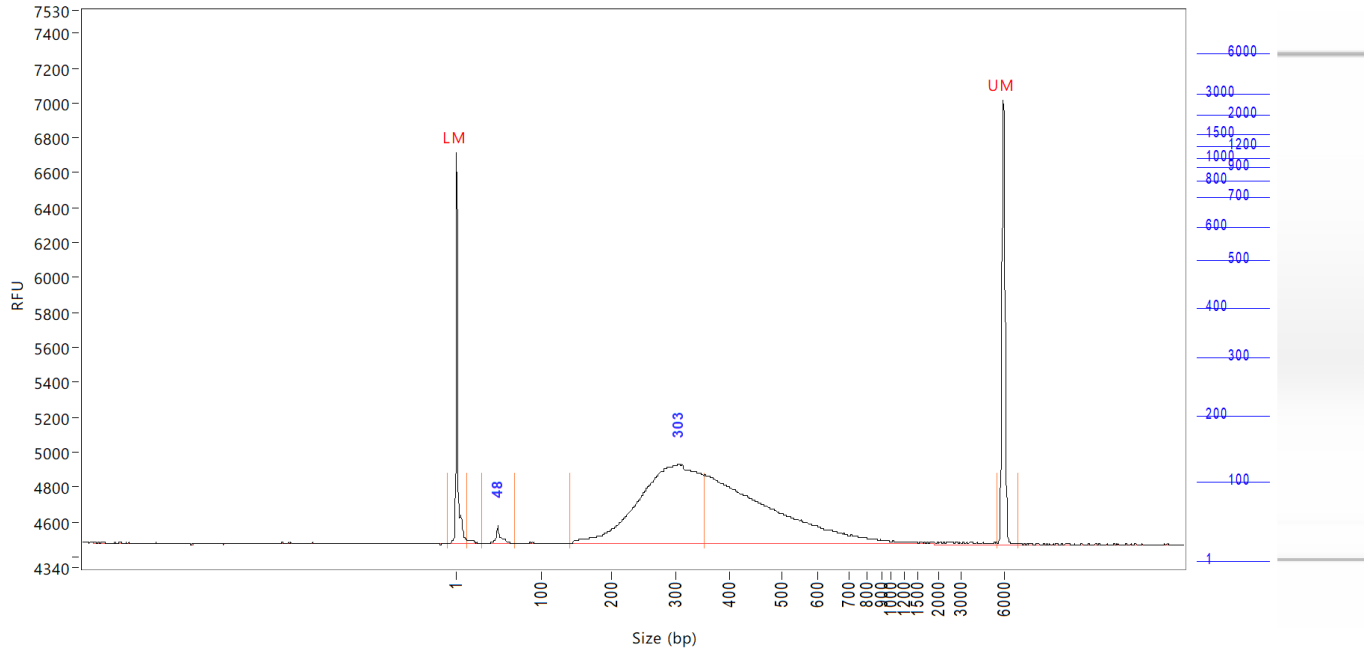

| Peak | Size (bp) | Conc. (ng/uL) | From (bp) | To (bp) | RFU  |
|------|-----------|---------------|-----------|---------|------|
| 1    | 1 (LM)    | 0.0124        | 0         | 15      | 2234 |
| 2    | 48        | 0.0147        | 31        | 70      | 106  |
| 3    | 303       | 0.5975        | 141       | 354     | 453  |
| 4    | 6000 (UM) | 0.0091        | 5593      | 7036    | 2547 |

TIC: 0.6123 ng/uL  
 TIM: 3.9929 nmole/L  
 Total Conc.: 1.1100 ng/uL

Smear Analysis      75 bp to 1500 bp      1.0832 ng/uL      97.6 %Total      4.8779 nmole/L      365 Avg. Size (b.p.)      36.35 %CV

Sample Peak Width (sec): 10      Sample Min Peak Height: 100      Sample Baseline V to V?: Y      Sample Baseline V to V pts: 3  
 Sample Filter: Binomial      # of Pts for Filter: 3      Sample Start Region (min): 0      Sample End Region (min): 50  
 Manual Baseline Start (min): 10      Manual Baseline End (min): 48  
 Marker Peak Width (sec): 5      Marker Min Peak Height: 200      Marker Baseline V to V?: Y      Marker Baseline V to V pts: 3  
 Lower Marker Selection: First Peak > 200 RFU      Upper Marker Selection: Last Peak > 200 RFU  
 Ladder Size (bp): 1, 100, 200, 300, 400, 500, 600, 700, 800, 900, 1000, 1200, 1500, 2000, 3000, 6000  
 Quantification Using: Ladder      Final Concentration (ng/uL): 0.0830      Dilution Factor: 12.0

**Sample:** DNA Size Ladder

**Well Location:** H12

**Created:** Friday, June 21, 2019 2:11:36 PM

**Import From:** X:\Lopende Opdrachten\Diagnosics\BRAVO targeted Seq\103291-065 Exp92170\Sample prep\PrepQC\_103291-065\_103

**Fit Type:** Point to Point

Calibration Curve

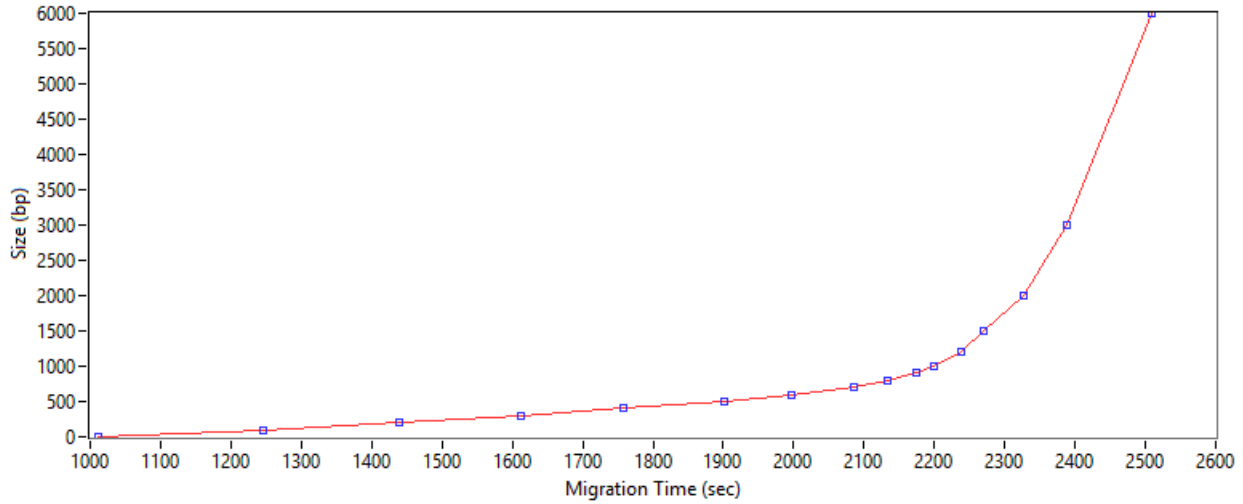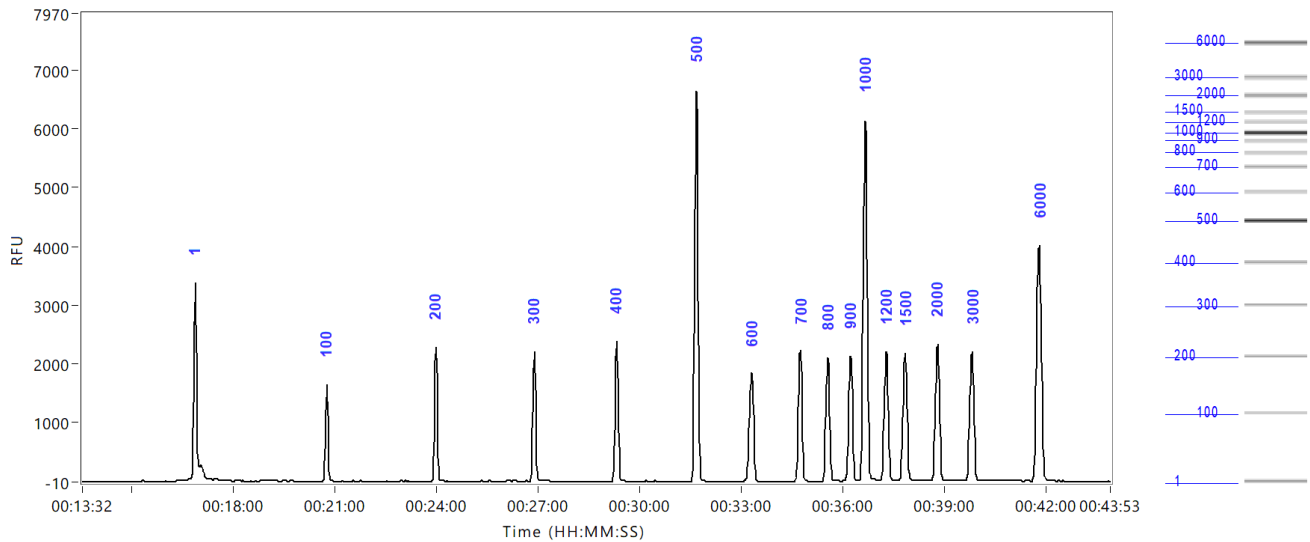

Supplement: 12940_2022_860_MOESM4_ESM.pdf [file 12940_2022_860_MOESM4_ESM.pdf]
